# Supplementary material for: Discovery of a Highly Selective Cell‐Active Inhibitor of the Histone Lysine Demethylases KDM2/7
Source: PubMed Central journal article supplement (PMC5725665; doi:10.1002/anie.201706788), 2017-11-07
Supplement: ANIE-56-15555-s001.pdf [file ANIE-56-15555-s001.pdf]

## Supporting Information

### **Discovery of a Highly Selective Cell-Active Inhibitor of the Histone Lysine Demethylases KDM2/7**

*Philip A. Gerken, Jamie R. Wolstenhulme, Anthony Tumber, Stephanie B. Hatch, Yijia Zhang, Susanne Müller, Shane A. Chandler, Barbara Mair, Fengling Li, Sebastian M. B. Nijman, Rebecca Konietzny, Tamas Szommer, Clarence Yapp, Oleg Fedorov, Justin L. P. Benesch, Masoud Vedadi, Benedikt M. Kessler, Akane Kawamura, Paul E. Brennan,\* and Martin D. Smith\**

anie\_201706788\_sm\_miscellaneous\_information.pdf

# Supporting Information

## Table of Contents

|       |                                                                                     |     |
|-------|-------------------------------------------------------------------------------------|-----|
| I)    | Synthesis – General Information .....                                               | 2   |
| II)   | Synthesis – Experimental Procedures .....                                           | 4   |
|       | 2.1 General Experimental Procedures .....                                           | 4   |
|       | 2.2 Experimental Procedures .....                                                   | 7   |
| III)  | Biological Activity Assays .....                                                    | 99  |
|       | 3.1 AlphaScreen and Rapidfire assays .....                                          | 99  |
|       | 3.2 Selectivity-screening against other epigenetic writer and reader proteins ..... | 106 |
|       | 3.3 Cellular immunofluorescence activity assay and HeLa cytotoxicity .....          | 109 |
|       | 3.4 Additional viability assays .....                                               | 110 |
| IV)   | Transcriptomics .....                                                               | 111 |
| V)    | Native Mass-Spectrometry .....                                                      | 123 |
| VI)   | Mode of Action Studies .....                                                        | 124 |
| VII)  | Photoaffinity Labelling .....                                                       | 126 |
| VIII) | Computational Docking .....                                                         | 128 |
| IX)   | NMR Spectra .....                                                                   | 129 |
| X)    | HPLC Traces .....                                                                   | 260 |
| XI)   | X-ray Crystallography Data .....                                                    | 267 |
| XII)  | References .....                                                                    | 269 |

## I) Synthesis – General Information

### Reaction Conditions

Reactions were carried out in flame-dried glassware under an atmosphere of argon unless stated otherwise. Room temperature (rt) refers to 20-25 °C. Temperatures of 0 °C were obtained using an ice/water bath. Temperatures of -78 °C were obtained using a dry ice/acetone bath. Reflux conditions were obtained using an oil bath or a Drysyn® heating block equipped with a contact thermometer. Temperatures of 0 °C or below which had to be maintained for extended periods of time were obtained using a Julabo FT902 immersion cooler.

### Solvents

Acetonitrile, dichloromethane, diethyl ether, methanol and tetrahydrofuran were purified by filtration through activated alumina columns employing the method of Grubbs *et al.*<sup>1</sup> Dimethylsulfoxide, dimethylformamide, and *N*-methylpyrrolidinone were purchased as an anhydrous solvent in a Sure/Seal™ bottle from Sigma-Aldrich. All other solvents were used as supplied without prior purification.

### Reagents and Catalysts

All reagents were used directly as supplied by major chemical suppliers or following purification procedures described by Perrin and Armarego.<sup>2</sup>

### Chromatography

Thin layer chromatography was performed on Merck Kieselgel 60 F<sub>254</sub> 0.25 mm precoated aluminium plates. Product spots were visualized under UV light ( $\lambda = 254$  nm) and/or by staining with potassium permanganate solution, vanillin solution, or ninhydrin solution. Flash pressure column chromatography was performed using VWR silica gel 60 (40-63  $\mu\text{m}$  particle size) using head pressure by means of a nitrogen line.

### Nuclear Magnetic Resonance Spectrometry

NMR spectroscopy was carried out using Bruker Avance spectrometers in the deuterated solvent stated, using the residual non-deuterated solvent signal as an internal reference. <sup>19</sup>F NMR spectra were referenced externally to CFCl<sub>3</sub> in CDCl<sub>3</sub>. Magnetic field strengths are quoted in MHz and refer to the resonance frequency

of the relevant nucleus. Chemical shifts are quoted in ppm with signal splittings recorded as singlet (s), doublet (d), triplet (t), quartet (q), quintet (quin), sextet (sex), septet (sept), octet (oct), nonet (non) and multiplet (m). The abbreviation br. is to denote broad, app. to denote apparent, Ph to denote phenyl, and C=O to denote carbonyl groups. Coupling constants,  $J$ , are measured to the nearest 0.1 Hz for  $^1\text{H}$  NMR spectra and to the nearest 1 Hz for  $^{13}\text{C}$  NMR spectra and are presented as observed. For rotameric molecules, spectra were obtained at 348 K in deuterated benzene or deuterated dimethylsulfoxide.

## Mass Spectrometry

Low resolution mass spectra were recorded on a Micromass LCT Premier spectrometer under conditions of electrospray ionization (ESI). High resolution mass spectra were carried out using Bruker MicroTOF and Micromass GCT spectrometers under conditions of electrospray ionization (ESI), field ionization (FI) and chemical ionization (CI). Values are reported as a ratio of mass to charge in Daltons.

## Polarimetry

Optical rotations were recorded on a Perkin-Elmer 241 polarimeter with a path length of 1 dm (using the sodium D line, 589 nm). Concentrations are reported in g/100 mL. Temperatures are reported in °C.

## Melting Points

Melting points were determined using a Reichert melting point apparatus and are uncorrected.

## HPLC

Analytical chiral HPLC was performed on a Dionex UltiMate 3000 system comprising a Dionex LPG-3400A pump, WPS-3000SL autosampler, TCC-3000SD column compartment, DAD-3000 diode-array detector, fitted with the appropriate Daicel Chiralpak column (dimensions: 0.46 cm  $\varnothing$  x 25 cm) and corresponding guard column (0.4 cm  $\varnothing$  x 1 cm). Wavelengths ( $\lambda$ ) are reported in nm, retention times ( $\tau_R$ ) are reported in minutes and solvent flow rates are reported in mL min<sup>-1</sup>. Semi-preparatory HPLC was performed on the same system, fitted with a YMC Chiral amylose-SA S-5 $\mu\text{m}$  column (dimensions: 250 x 10.0 mm I.D.).

## II) Synthesis – Experimental Procedures

### 2.1 General Experimental Procedures

#### General Procedures for Synthesis of Class 1 Racemic Indolines:

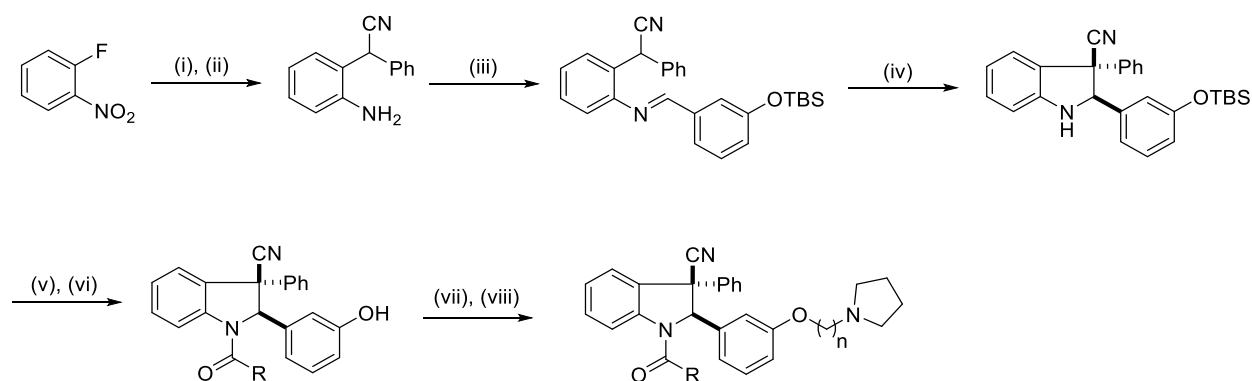

#### Class 1

**Scheme 1:** Reagents and conditions: (i) PhCH<sub>2</sub>CN (1 eq.), NaOH (50% aq., 13 eq.), toluene, 0 °C, 47%; (ii) Zn powder (10 eq.), NH<sub>4</sub>Cl (15 eq.), 5:1 acetone/H<sub>2</sub>O, rt, 82%; (iii) **21** (1.1 eq.), 3 Å mol. sieves, toluene, 100 °C, 46%; (iv) <sup>t</sup>BuOK (2 eq.), toluene, 0 °C, 81%; (v) RCOCl (1.2 eq.), pyridine (1.25 equiv), CH<sub>2</sub>Cl<sub>2</sub>, 0 °C, 59%-97%; (vi) TBAF (1.2 eq.), THF, rt, 62%-99%; (vii) Br-(CH<sub>2</sub>)<sub>n</sub>-Br (3 eq.), K<sub>2</sub>CO<sub>3</sub> (5 eq.), acetone, reflux, 31%-94%; (viii) pyrrolidine (2 eq.), K<sub>2</sub>CO<sub>3</sub> (5 eq.), CH<sub>3</sub>CN, 60 °C, 65%-99%.

#### General Procedures for Synthesis of Class 2 Racemic Indolines:

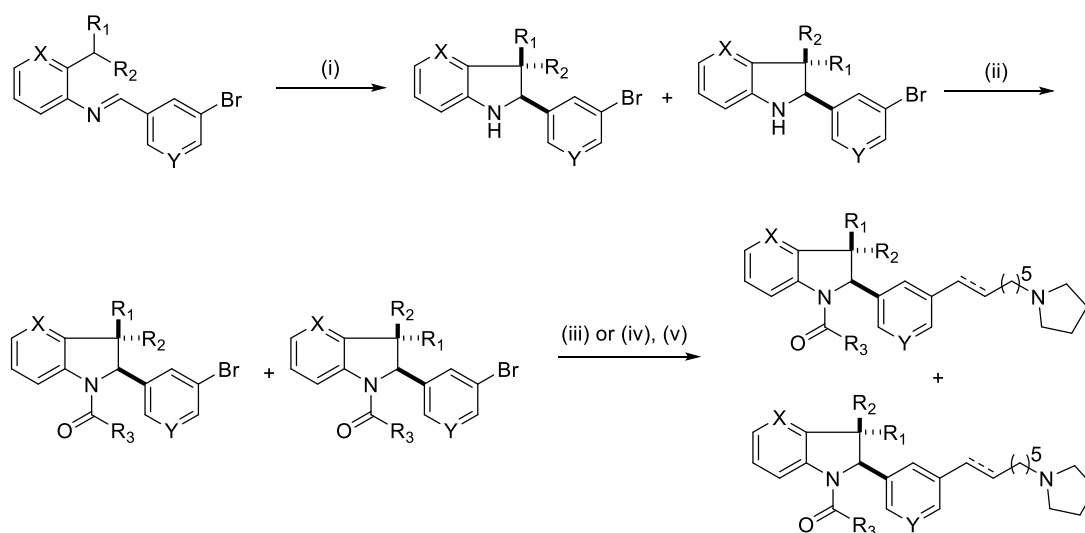

#### Class 2

**Scheme 2:** Reagents and conditions: (i) KO<sup>t</sup>Bu (1.1-1.8 eq.), toluene, 0 °C. (ii) R<sub>3</sub>COCl (2-5 eq.), pyridine (2-5 eq.), CH<sub>2</sub>Cl<sub>2</sub>, rt; (iii) Bu<sub>3</sub>SnC<sub>7</sub>H<sub>12</sub>N(C<sub>4</sub>H<sub>8</sub>) (1.2 eq.) Pd(PPh<sub>3</sub>)<sub>4</sub> (0.1 eq.) NMP, heating; (iv) C<sub>7</sub>H<sub>11</sub>N(C<sub>4</sub>H<sub>8</sub>) (1.2 eq.), PdCl<sub>2</sub>(PPh<sub>3</sub>)<sub>2</sub> (0.05 eq.), CuI (0.05 eq.), NH<sup>t</sup>Pr<sub>2</sub>, heating; (v) H<sub>2</sub>, Pd/C, MeOH, rt.

### **General Procedure 1: Racemic cyclization of imines to form indolines**

KO<sup>t</sup>Bu (1.1-1.8 eq.) was added to a solution of imine (1 eq.) in toluene and stirred at 0 °C until completion. NH<sub>4</sub>Cl (saturated aq., 10 mL/mmol imine) was added, and the mixture was extracted with EtOAc. The combined organic extracts were washed with brine, dried over Na<sub>2</sub>SO<sub>4</sub>, filtered, and concentrated.

### **General Procedure 2: Acylation of indolines with acyl chlorides and chloroformates**

Acyl chloride (2-5 eq.) was added portionwise/dropwise to a solution of indoline (1 eq.) and pyridine (2-5 eq.) in CH<sub>2</sub>Cl<sub>2</sub>. The reaction mixture was stirred at rt until completion. NaHCO<sub>3</sub> (saturated aq., 10 mL/mmol indoline) was added, and the mixture was extracted with CH<sub>2</sub>Cl<sub>2</sub>. The combined organic extracts were washed with brine, dried over Na<sub>2</sub>SO<sub>4</sub>, filtered, and concentrated.

### **General Procedure 3: Deprotection of TBS-protected phenols**

To a solution of the appropriate TBS protected phenol (300 mg) in THF (5 mL) at room temperature was added TBAF (1.0 M in THF, 1.2 eq.) and the reaction was stirred for 10 minutes before acidifying with 1 M HCl and extracting with EtOAc. The organic layer was dried over MgSO<sub>4</sub> and evaporated under reduced pressure. Purification by column chromatography afforded the respective product.

### **General Procedure 4: Alkylation of phenols with alkyl dibromide**

To a solution of the appropriate phenol (200 mg) in acetone (5 mL, pre-dried over 3 ÅMS) was added K<sub>2</sub>CO<sub>3</sub> (5.0 eq.) and the required alkyl dibromide (3.0 eq.). The reaction was stirred at reflux overnight before cooling to room temperature and concentrating *in vacuo*. The residue was dissolved in EtOAc, washed with water and brine, dried over MgSO<sub>4</sub> and evaporated under reduced pressure. Purification by column chromatography afforded the respective product.

### **General Procedure 5: Alkylation of pyrrolidine**

To a solution of the appropriate bromide (200 mg) in MeCN (5 mL) was added K<sub>2</sub>CO<sub>3</sub> (5.0 eq.) and pyrrolidine (2.0 eq.). The reaction was heated to 60 °C overnight before diluting with EtOAc and washing with water and brine. The organic phase was dried over MgSO<sub>4</sub> and evaporated under reduced pressure. Purification by column chromatography (SiO<sub>2</sub>, DCM/MeOH/Et<sub>3</sub>N 95:5:0.5) afforded the respective product.

**General Procedure 6: Stille-Migita cross-coupling**

A solution of aryl bromide/triflate (1 eq.) and vinyl stannane (1.2 eq.) in NMP was degassed with Ar. Pd(Ph<sub>3</sub>)<sub>4</sub> (0.1 eq.) was added, and the mixture was stirred at the specified temperature until completion. The reaction mixture was allowed to cool to rt, diluted with CH<sub>2</sub>Cl<sub>2</sub>, and washed 3 times with H<sub>2</sub>O, then brine. The organic layer was dried over Na<sub>2</sub>SO<sub>4</sub>, filtered, and concentrated.

**General Procedure 7: Sonogashira cross-coupling in *N,N*-diisopropylamine**

Indoline (1 eq.), PdCl<sub>2</sub>(PPh<sub>3</sub>)<sub>2</sub> (0.05 eq.), and CuI (0.05 eq.) were degassed 3 times in a Schlenk tube with Ar. A degassed solution of alkyne (1.2 eq.) in *N,N*-diisopropylamine was added, and the reaction mixture was stirred at the specified temperature until completion. The reaction mixture was allowed to cool to rt, filtered through Celite™ and eluted with EtOAc. The filtrate was washed 3 times with H<sub>2</sub>O, then brine, dried over Na<sub>2</sub>SO<sub>4</sub>, filtered, and concentrated.

**General Procedure 8: Hydrogenation and hydrogenolysis over Pd/C**

Pd/C (wet degussa type, 10% w/w substrate) was added to a solution of the substrate in the specified solvent. The suspension was first degassed 3 times with N<sub>2</sub> using a pump-flood procedure and then flushed 3 times with H<sub>2</sub> using a pump-flood procedure. The reaction mixture was stirred under a H<sub>2</sub> atmosphere until completion and flushed with N<sub>2</sub>. The suspension was filtered through Celite™, eluted with EtOAc, and concentrated.

## 2.2 Experimental Procedures

### 2-Phenylnitrile nitrobenzene **19**

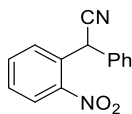

Nitrile **19** was prepared according to a modified literature procedure.<sup>3</sup> NaOH (aq., 50% w/w, 12 mL, 150 mmol) was added to a suspension of 1-fluoro-2-nitrobenzene (3.2 mL, 30 mmol), benzyl cyanide (3.5 mL, 30 mmol), and tetrabutylammonium bisulfate (10.2 g, 30.0 mmol) in toluene (80 mL). The mixture was stirred at 0 °C for 60 min. HCl (aq., 1 M, 150 mL) was added, and the mixture was extracted with CH<sub>2</sub>Cl<sub>2</sub>. The combined organic extracts were washed with brine, dried over MgSO<sub>4</sub>, filtered, and concentrated. Purification by flash pressure column chromatography (10% EtOAc/petroleum ether) afforded nitrile **19** as a yellow solid (3.34 g, 14.0 mmol, 47%).

<sup>1</sup>H NMR (400 MHz, CDCl<sub>3</sub>): δ 6.18 (s, 1H), 7.30-7.41 (m, 5H), 7.56 (ddd, *J* = 8.3 Hz, *J* = 7.4 Hz, *J* = 1.3 Hz, 1H), 7.68-7.77 (m, 2H), 8.08 (dd, *J* = 8.3 Hz, *J* = 1.3 Hz, 1H).

<sup>13</sup>C NMR (100.6 MHz, CDCl<sub>3</sub>): δ 38.3, 118.6, 125.8, 127.9, 128.7, 129.3, 129.7, 130.5, 130.9, 134.1, 134.1, 147.6.

HRMS (ES<sup>+</sup>): C<sub>14</sub>H<sub>10</sub>N<sub>2</sub>NaO<sub>2</sub><sup>+</sup> requires 261.0634; found 261.0640.

MP: 47-48 °C.

### 2-Phenylnitrile aniline **20**

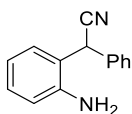

Aniline **20** was prepared according to a modified literature procedure.<sup>4</sup> Zinc powder (8.24 g, 126 mmol) and NH<sub>4</sub>Cl (10.1 g, 189 mmol) were added to a solution of nitrile **19** (3.00 g, 12.6 mmol) in 5:1 acetone/H<sub>2</sub>O (240 mL). The mixture was stirred at rt for 20 min, then filtered through Celite<sup>TM</sup>, eluted with EtOAc, and washed with water, then brine. The organic layer was dried over MgSO<sub>4</sub>, filtered, and concentrated. Purification by flash pressure column chromatography (13% EtOAc/petroleum ether) afforded aniline **20** as an orange solid (2.16 g, 10.4 mmol, 82%).



**<sup>1</sup>H NMR (400 MHz, CDCl<sub>3</sub>):** δ 3.54 (br. s, 2H), 5.19 (s, 1H), 6.74 (dd, *J* = 7.8 Hz, 1.2 Hz, 1H), 6.89 (td, *J* = 7.8 Hz, 1.2 Hz, 1H), 7.21 (td, *J* = 7.8 Hz, 1.2 Hz, 1H), 7.30-7.44 (m, 6H).

**<sup>13</sup>C NMR (100.6 MHz, CDCl<sub>3</sub>):** δ 39.0, 117.5, 118.9, 119.5, 120.0, 127.7, 128.5, 129.4, 129.5, 129.6, 133.9, 143.8.

**HRMS (ES<sup>+</sup>):** C<sub>14</sub>H<sub>12</sub>N<sub>2</sub>Na<sup>+</sup> requires 231.0893; found 231.0901.

**MP:** 72-73 °C.

### 3-((Tert-butyltrimethylsilyloxy)benzylidene)benzaldehyde **21**

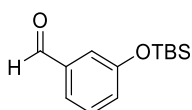

Aldehyde **21** was prepared according to a literature procedure.<sup>5</sup> To a solution of 3-hydroxybenzaldehyde (5.00 g, 40.9 mmol) in acetonitrile (10 mL) was added K<sub>2</sub>CO<sub>3</sub> (11.3 g, 81.9 mmol) followed by TBSCl (7.40 g, 49.1 mmol). The reaction was stirred at room temperature for 24 hours before EtOAc was added and the organic layer washed with water and brine. After drying over MgSO<sub>4</sub> and evaporation under reduced pressure, purification by column chromatography (SiO<sub>2</sub>, EtOAc/PE 1:19) afforded the title compound as a colourless liquid (6.86 g, 29.2 mmol, 71% yield). The spectral data match those reported in the literature.

**<sup>1</sup>H NMR (400 MHz, CDCl<sub>3</sub>):** δ 0.23 (s, 6H), 1.00 (s, 9H), 7.11 (ddd, *J* = 8.0 Hz, *J* = 2.5 Hz, *J* = 1.2 Hz, 1H), 7.33 (dd, *J* = 2.4 Hz, *J* = 1.6 Hz, 1H), 7.40 (t, *J* = 7.8 Hz, 1H), 7.48 (dt, *J* = 7.6 Hz, *J* = 1.3 Hz, 1H), 9.96 (s, 1H).

**<sup>13</sup>C NMR (100.6 MHz, CDCl<sub>3</sub>):** δ -4.4, 18.2, 25.6, 119.9, 123.6, 126.6, 130.1, 137.9, 156.4, 192.2.

### (*E*)-2-(2-((3-((Tert-butyltrimethylsilyloxy)benzylidene)amino)phenyl)-2-phenylacetonitrile) **22**

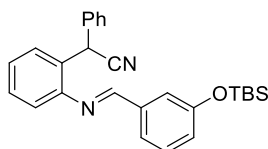

To a solution of 3-((tert-butyltrimethylsilyloxy)benzylidene)benzaldehyde **21** (2.62 g, 11.0 mmol) in toluene (50 mL) was added 2-(2-aminophenyl)-2-phenylacetonitrile **20** (2.07 g, 10.0 mmol) and 3 Å MS (10 g). The reaction was stirred at 100 °C for 72 hours before filtering through celite (EtOAc) and evaporating under reduced pressure.

Purification by column chromatography (SiO<sub>2</sub>, EtOAc/PE 1:19) afforded the title compound as a colourless oil (1.95 g, 4.58 mmol, 46% yield).

<sup>1</sup>H NMR (400 MHz, CDCl<sub>3</sub>): δ 0.25 (s, 6H), 1.02 (s, 9H), 5.95 (s, 1H), 7.01 (ddd, *J* = 8.0 Hz, *J* = 2.5 Hz, *J* = 1.0 Hz, 1H), 7.07 (dd, *J* = 7.9 Hz, *J* = 1.2 Hz, 1H), 7.22-7.31 (m, 1H), 7.32-7.43 (m, 5H), 7.44-7.48 (m, 1H), 7.52 (dd, *J* = 7.7 Hz, *J* = 1.4 Hz, 1H), 8.33 (s, 1H).

<sup>13</sup>C NMR (100.6 MHz, CDCl<sub>3</sub>): δ -4.3, 18.3, 25.7, 37.4, 118.1, 119.6, 120.3, 122.7, 123.9, 126.9, 127.8, 127.8, 128.4, 128.9, 129.5, 129.9, 131.0, 136.3, 137.4, 148.7, 156.2, 160.7.

HRMS (ES<sup>+</sup>): [C<sub>27</sub>H<sub>31</sub>ON<sub>2</sub>Si]<sup>+</sup> (M+H)<sup>+</sup> requires 427.2211; found 427.2194.

(2*RS*,3*RS*)-2-(3-((Tert-butyltrimethylsilyloxy)phenyl)-3-phenylindoline-3-carbonitrile **23** and (2*RS*,3*SR*)-2-(3-((tert-butyltrimethylsilyloxy)phenyl)-3-phenylindoline-3-carbonitrile **24**

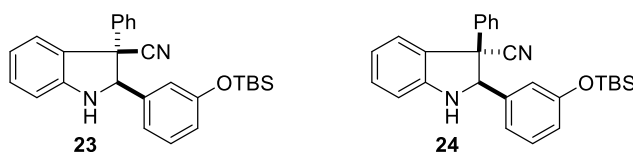

To a solution of 2-(2-((3-((tert-butyltrimethylsilyloxy)benzylidene)amino)phenyl)-2-phenylacetonitrile **22** (1.30 g, 3.05 mmol) in PhMe (100 mL) at 0 °C was added <sup>t</sup>BuOK (674 mg, 6.10 mmol). The reaction was stirred for 30 minutes before quenching with NH<sub>4</sub>Cl and extracting with EtOAc. The combined organic layers were washed with brine, dried over MgSO<sub>4</sub> and evaporated under reduced pressure. Purification by column chromatography (SiO<sub>2</sub>, EtOAc/PE 1:19) afforded the title compounds as a colourless liquid (1.03 g, 2.42 mmol, 81% yield, 9:1 d.r.).

N.B. Stereochemistry assigned by analogy to previously reported similar indolines.<sup>6</sup>

(2*RS*,3*RS*)-2-(3-((Tert-butyltrimethylsilyloxy)phenyl)-3-phenylindoline-3-carbonitrile **23**:

<sup>1</sup>H NMR (400 MHz, CDCl<sub>3</sub>): δ 0.13 (s, 3H), 0.15 (s, 3H), 0.95 (s, 9H), 4.29 (br. s, NH, 1H), 4.99 (s, 1H), 6.74 (t, *J* = 1.9 Hz, 1H), 6.83-6.90 (m, 4H), 7.02-7.05 (m, 1H), 7.21 (t, *J* = 7.9 Hz, 1H), 7.26 (td, *J* = 7.8 Hz, *J* = 1.2 Hz, 1H), 7.38-7.47 (m, 5H).

<sup>13</sup>C NMR (100.6 MHz, CDCl<sub>3</sub>): δ -4.4, -4.4, 18.2, 25.7, 58.3, 77.4, 110.4, 118.8, 119.1, 120.5, 120.5, 120.9, 125.8, 127.4, 127.7, 128.4, 128.8, 129.5, 130.2, 137.8, 138.0, 150.3, 155.7

**HRMS (ES<sup>+</sup>):** [C<sub>27</sub>H<sub>30</sub>N<sub>2</sub>NaOSi]<sup>+</sup> (M+Na)<sup>+</sup> requires 449.2020; found 449.2025.

(2*RS*,3*SR*)-2-(3-((Tert-butyldimethylsilyloxy)phenyl)-3-phenylindoline-3-carbonitrile **24**:

**<sup>1</sup>H NMR (400 MHz, CDCl<sub>3</sub>):** δ 0.08 (s, 3H), 0.10 (s, 3H), 0.94 (s, 9H), 4.19 (d, *J* = 2.7 Hz, 1H), 5.51 (d, *J* = 2.8 Hz, 1H), 6.61-6.66 (m, 2H), 6.75-6.80 (m, 3H), 6.87-6.96 (m, 2H), 6.96-7.02 (m, 1H), 7.03-7.10 (m, 3H), 7.27-7.34 (m, 2H).

**<sup>13</sup>C NMR (100.6 MHz, CDCl<sub>3</sub>):** δ -4.4, -4.4, 18.1, 25.7, 55.2, 74.3, 110.4, 119.1, 120.1, 120.5, 120.7, 121.8, 125.6, 127.8, 127.9, 128.0, 128.3, 129.0, 130.2, 134.3, 137.2, 150.1, 155.5.

**HRMS (ES<sup>+</sup>):** [C<sub>27</sub>H<sub>30</sub>N<sub>2</sub>NaOSi]<sup>+</sup> (M+Na)<sup>+</sup> requires 449.2020; found 449.2027.

(2*RS*,3*RS*)-1-Acetyl-2-(3-((tert-butyldimethylsilyloxy)phenyl)-3-phenylindoline-3-carbonitrile **25**

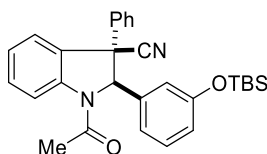

To a solution of 2-(3-((tert-butyldimethylsilyloxy)phenyl)-3-phenylindoline-3-carbonitrile **23** (1.00 g, 2.35 mmol) in CH<sub>2</sub>Cl<sub>2</sub> (40 mL) at 0 °C was added pyridine (240 μL, 2.94 mmol), and AcCl (200 mL, 2.82 mmol). The reaction was stirred for 15 minutes before quenching with NaHCO<sub>3</sub> and extracting into DCM. The combined DCM layers were washed with brine, dried over MgSO<sub>4</sub> and evaporated under reduced pressure. Purification by column chromatography (SiO<sub>2</sub>, EtOAc/PE 1:9) afforded the title compound as a colourless liquid which slowly crystallized into a white solid (1.03 g, 2.19 mmol, 93% yield).

**<sup>1</sup>H NMR (400 MHz, CDCl<sub>3</sub>):** δ 0.01 (s, 3H), 0.03 (s, 3H), 0.84 (s, 9H), 1.88 (s, 3H), 5.13 (s, 1H), 6.55 (t, *J* = 1.8 Hz, 1H), 6.75-6.82 (m, 2H), 7.11-7.22 (m, 4H), 7.23-7.27 (m, 1H), 7.27-7.34 (m, 3H), 7.41 (ddd, *J* = 8.8 Hz, *J* = 7.5 Hz, *J* = 1.4 Hz, 1H), 8.33 (br. s, 1H).

**<sup>13</sup>C NMR (125.75 MHz, CDCl<sub>3</sub>):** δ -4.5, -4.5, 18.2, 24.1, 25.7, 57.6, 76.3, 117.2, 117.6, 118.4, 119.4, 121.7, 125.5, 125.6, 125.7, 128.2, 128.9, 129.6, 130.6, 130.7, 138.7, 140.3, 143.1, 156.6, 169.0.

**HRMS (ESI<sup>+</sup>, m/z):** [C<sub>29</sub>H<sub>32</sub>N<sub>2</sub>NaO<sub>2</sub>Si]<sup>+</sup> (M+Na)<sup>+</sup> calc. 491.2125, found 491.2131.

(2*RS*,3*RS*)-1-acetyl-2-(3-hydroxyphenyl)-3-phenylindoline-3-carbonitrile **26**

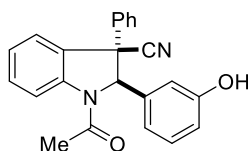

To a solution of 2-(3-((tert-butyldimethylsilyloxy)phenyl)-3-phenylindoline-3-carbonitrile **25** (1.00 g, 2.14 mmol) in THF (20 mL) at room temperature was added TBAF (1 M in THF, 4.3 mL, 4.3 mmol). The reaction was stirred for 10 minutes before being diluted with EtOAc (50 mL) and acidified with 1 M HCl. The aqueous layer was discarded and the organic layer dried over MgSO<sub>4</sub> and evaporated under reduced pressure. Purification by column chromatography (SiO<sub>2</sub>, EtOAc/PE 1:3) afforded the title compound as a colourless liquid which slowly crystallized into a white solid (562 mg, 1.71 mmol, 80% yield).

<sup>1</sup>H NMR (500 MHz, CDCl<sub>3</sub>): δ 1.98 (br. s, 3H), 5.27 (br. s, 1H), 5.69 (br. s, 1H), 6.70 (t, *J* = 1.9 Hz, 1H), 6.84 (d, *J* = 7.7 Hz, 1H), 6.88 (dd, *J* = 8.0 Hz, *J* = 1.9 Hz, 1H), 7.24-7.29 (m, 3H), 7.31 (t, *J* = 7.9 Hz, 1H), 7.33-7.38 (m, 1H), 7.39-7.45 (m, 3H), 7.48-7.53 (m, 1H), 8.42 (br. s, 1H).

<sup>13</sup>C NMR (125.75 MHz, CDCl<sub>3</sub>): δ 24.1, 57.6, 76.3, 112.9, 116.9, 117.3, 118.5, 118.7, 125.5, 125.6, 125.8, 128.7, 129.0, 129.6, 130.8, 130.8, 139.0, 140.3, 142.9, 156.7, 169.4.

HRMS (ESI<sup>+</sup>, *m/z*): [C<sub>23</sub>H<sub>18</sub>N<sub>2</sub>NaO<sub>2</sub>]<sup>+</sup> (*M*+Na)<sup>+</sup> calc. 377.1260, found 377.1261.

Methyl 6-hydroxyhexanoate **27**

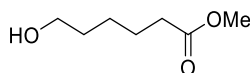

Ester **27** was prepared according to a literature procedure.<sup>7</sup> To a solution of ε-caprolactone (10.0 g, 87.6 mmol) in dry MeOH (100 mL) was added H<sub>2</sub>SO<sub>4</sub> (0.8 mL) and the reaction was stirred at room temperature for 48 hours. The reaction was concentrated under reduced pressure and diluted with ether before washing with water, NaHCO<sub>3</sub> and brine. The ether layer was dried over MgSO<sub>4</sub> and evaporated under reduced pressure to

afford the title compound which did not require further purification. The spectral data match those reported in the literature.

**<sup>1</sup>H NMR (400 MHz, CDCl<sub>3</sub>):** δ 1.36-1.46 (2H, m), 1.55-1.64 (2H, m), 1.64-1.72 (2H, m), 1.67 (1H br. s, OH), 2.34 (2H, t, *J* = 7.5 Hz), 3.66 (2H, t, *J* = 6.6 Hz), 3.68 (3H, s).

**<sup>13</sup>C NMR (100.6 MHz, CDCl<sub>3</sub>):** δ 24.6, 25.3, 32.3, 34.0, 51.5, 62.6, 174.2.

#### Methyl 6-oxohexanoate **28**

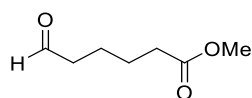

Aldehyde **28** was prepared according to a literature procedure.<sup>8</sup> To a solution of PCC (8.20 g, 38.0 mmol) in DCM (70 mL) was added methyl 6-hydroxyhexanoate **27** (5.11 g, 35.0 mmol) in DCM (10 mL). The reaction was stirred at room temperature for 2 hours before ether was added. The solution was decanted and the black residue washed several times with ether. Purification by column chromatography (SiO<sub>2</sub>, Et<sub>2</sub>O/PE 1:3) afforded the title compound as a colourless liquid (2.99 g, 20.7 mmol, 59% yield). The spectral data match those reported in the literature.

**<sup>1</sup>H NMR (400 MHz, CDCl<sub>3</sub>):** δ 1.62-1.68 (m, 4H), 2.29-2.36 (m, 2H), 2.43-2.49 (m, 2H), 3.65 (s, 3H), 9.75 (t, *J* = 1.6 Hz, 1H).

**<sup>13</sup>C NMR (100.6 MHz, CDCl<sub>3</sub>):** δ 21.5, 24.3, 33.7, 43.5, 51.6, 173.7, 202.0.

#### Methyl 6-cyclopentylidenehexanoate **29**

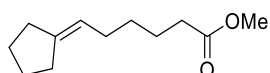

To a solution of cyclopentyltriphenylphosphonium bromide (10.0 g, 24.3 mmol) in THF (100 mL) at 0 °C was slowly added <sup>n</sup>BuLi (1.6 M soln hexanes, 15.2 mL, 24.3 mmol). The reaction was stirred at room temperature for 1 hour before cooling to 0 °C. A solution of methyl 6-oxohexanoate **28** (2.70 g, 18.7 mmol) in THF (5 mL) was added and the reaction was stirred for 24 hours before quenching with NH<sub>4</sub>Cl and extracting into EtOAc. The

organic phase was washed with brine, dried over  $\text{MgSO}_4$  and evaporated under reduced pressure. Purification by column chromatography ( $\text{SiO}_2$ ,  $\text{Et}_2\text{O}/\text{PE}$  1:49) afforded the title compound as a colourless liquid (2.92 g, 14.9 mmol, 80% yield).

$^1\text{H NMR}$  (400 MHz,  $\text{CDCl}_3$ ):  $\delta$  1.33-1.42 (m, 2H), 1.54-1.70 (m, 6H), 1.94-2.02 (m, 2H), 2.12-2.18 (m, 2H), 2.18-2.25 (m, 2H), 2.31 (t,  $J = 7.6$  Hz, 2H), 3.67 (s, 3H), 5.18-5.25 (m, 1H).

$^{13}\text{C NMR}$  (100.6 MHz,  $\text{CDCl}_3$ ):  $\delta = 24.7, 26.3, 26.4, 28.6, 29.2, 29.2, 33.6, 34.1, 51.4, 119.6, 143.5, 174.3$ .

HRMS (ESI<sup>+</sup>,  $m/z$ ):  $[\text{C}_{12}\text{H}_{20}\text{NaO}_2]^+$  ( $\text{M}+\text{Na}$ )<sup>+</sup> calc. 219.1356, found 219.1359.

### Methyl 6-cyclopentylhexanoate **30**

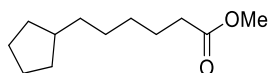

To a solution of methyl 6-cyclopentylidenehexanoate **29** (2.90 g, 14.8 mmol) in EtOAc (100 mL) at room temperature was added 10% Pd/C (314 mg). The reaction was stirred under an atmosphere of  $\text{H}_2$  for 20 hours before filtering through Celite™ (eluting with EtOAc) and evaporating under reduced pressure to afford the title compound as a colourless liquid (2.91 g, 99% yield).

$^1\text{H NMR}$  (400 MHz,  $\text{CDCl}_3$ ):  $\delta$  1.01-1.13 (m, 2H), 1.26-1.37 (m, 6H), 1.45-1.69 (m, 6H), 1.69-1.81 (m, 3H), 2.32 (t,  $J = 7.5$  Hz, 2H), 3.69 (s, 3H).

$^{13}\text{C NMR}$  (100.6 MHz,  $\text{CDCl}_3$ ):  $\delta$  25.0, 25.2, 28.4, 29.4, 32.7, 34.1, 36.0, 40.1, 51.4, 174.4.

HRMS (ESI<sup>+</sup>,  $m/z$ ):  $[\text{C}_{12}\text{H}_{22}\text{NaO}_2]^+$  ( $\text{M}+\text{Na}$ )<sup>+</sup> calc. 221.1512, found 221.1522.

### (2*RS*,3*RS*)-1-Acetyl-2-(3-((6-cyclopentylhexyl)oxy)phenyl)-3-phenylindoline-3-carbonitrile **32**

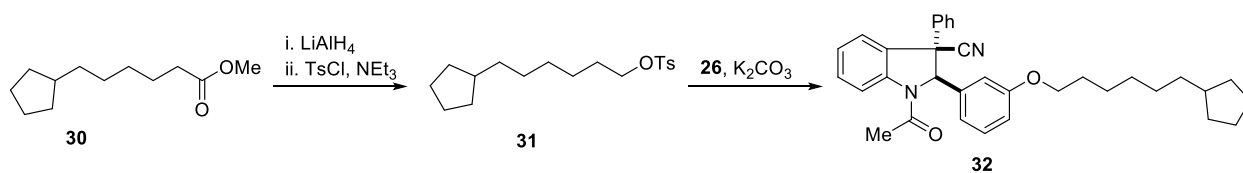

To a solution of methyl 6-cyclopentylhexanoate **30** (2.90 g, 14.8 mmol) in THF (100 mL) at 0 °C was added  $\text{LiAlH}_4$  (1.69 g, 44.4 mmol) and the reaction was warmed to room temperature after 10 minutes and stirred for 2 hours before cooling to 0 °C and quenching with  $\text{Na}_2\text{SO}_4 \cdot 10\text{H}_2\text{O}$  and filtering through Celite™ and then silica

(eluting with EtOAc). After concentrating *in vacuo* the residue was dissolved in DCM (50 mL), and Et<sub>3</sub>N (2.80 mL, 20.0 mmol) and TsCl (2.86 g, 15.0 mmol) were added. The reaction was stirred for 24 hours before quenching with NaHCO<sub>3</sub>. The organic layer was further washed with brine, dried over MgSO<sub>4</sub> and evaporated under reduced pressure. Purification by column chromatography (SiO<sub>2</sub>, PhMe/PE 4:1) afforded 6-cyclopentylhexyl 4-methylbenzenesulfonate **31** as a colourless liquid (182 mg, 0.56 mmol, 4% yield), which was used directly in the subsequent step.

To a solution of *syn*-1-acetyl-2-(3-hydroxyphenyl)-3-phenylindoline-3-carbonitrile **26** (125 mg, 0.38 mmol) in acetone (5 mL, pre-dried over 3 ÅMS) was added K<sub>2</sub>CO<sub>3</sub> (266 mg, 1.91 mmol) and 6-cyclopentylhexyl 4-methylbenzenesulfonate **31** (135 mg, 0.42 mmol). The reaction was stirred at reflux overnight before cooling to room temperature and concentrating *in vacuo*. The residue was dissolved in EtOAc, washed with water and brine, dried over MgSO<sub>4</sub> and evaporated under reduced pressure. Purification by column chromatography (SiO<sub>2</sub>, EtOAc/PE 1:9) afforded the title compound as a colourless oil (59 mg, 0.12 mmol, 31% yield).

<sup>1</sup>H NMR (400 MHz, CDCl<sub>3</sub>): δ 1.01-1.14 (m, 2H), 1.28-1.38 (m, 6H), 1.38-1.67 (m, 6H), 1.69-1.81 (m, 5H), 1.97 (br. s, 3H), 3.91 (t, *J* = 6.6 Hz, 2H), 5.27 (br. s, 1H), 6.75 (t, *J* = 1.6 Hz, 1H), 6.80 (d, *J* = 7.6 Hz, 1H), 6.92 (dd, *J* = 8.2 Hz, *J* = 2.1 Hz, 1H), 7.23 (td, *J* = 7.6 Hz, *J* = 0.9 Hz, 1H), 7.25-7.29 (m, 2H), 7.29-7.35 (m, 2H), 7.37-7.43 (m, 3H), 7.48-7.53 (m, 1H), 8.42 (br. s, 1H).

<sup>13</sup>C NMR (125.75 MHz, CDCl<sub>3</sub>): δ 24.1, 25.2, 26.1, 28.7, 29.2, 29.7, 32.8, 36.2, 40.2, 57.6, 68.1, 76.5, 113.0, 115.0, 117.3, 118.2, 118.5, 125.4, 125.6, 125.7, 125.8, 128.9, 129.6, 130.6, 130.7, 138.8, 140.5, 143.1, 159.8, 169.2.

HRMS (ESI<sup>+</sup>, *m/z*): [C<sub>34</sub>H<sub>39</sub>O<sub>2</sub>N<sub>2</sub>]<sup>+</sup> (M+Na)<sup>+</sup> calc. 507.3006, found 507.3000.

(2*RS*,3*RS*)-1-Benzoyl-2-(3-((tert-butyldimethylsilyl)oxy)phenyl)-3-phenylindoline-3-carbonitrile **34**

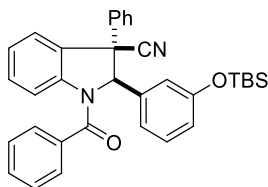

Prepared according to general procedure 2 using indoline **23** (1 eq.), benzoyl chloride (2 eq.), and pyridine (2 eq.) in CH<sub>2</sub>Cl<sub>2</sub> (0.2 M). Purification by flash pressure column chromatography (SiO<sub>2</sub>, EtOAc/PE 1:19) afforded the title compound as a white solid (59% yield).

<sup>1</sup>H NMR (500 MHz, CDCl<sub>3</sub>): δ 0.06 (s, 3H), 0.07 (s, 3H), 0.91 (s, 9H), 5.30 (s, 1H), 6.50 (s, 1H), 6.66 (br. s, 1H), 6.83 (ddd, *J* = 8.2 Hz, *J* = 2.4 Hz, *J* = 0.9 Hz, 1H), 7.05-7.21 (m, 3H), 7.21-7.32 (m, 5H), 7.35-7.50 (m, 6H), 7.89 (br. s, 1H).

<sup>13</sup>C NMR (125.75 MHz, CDCl<sub>3</sub>): δ -4.5, -4.5, 18.2, 25.7, 57.1, 117.4, 117.6, 118.5, 119.7, 121.3, 125.7, 125.8, 125.9, 126.9, 128.5, 128.9, 129.5, 129.5, 130.0, 130.1, 130.4, 130.7, 135.6, 138.8, 139.5, 143.1, 156.2, 169.6.

HRMS (ESI<sup>+</sup>, *m/z*): [C<sub>32</sub>H<sub>39</sub>O<sub>2</sub>N<sub>2</sub>Si]<sup>+</sup> (*M*+H)<sup>+</sup> calc. 511.2786, found 511.2769.

(2*RS*,3*RS*)-2-(3-((Tert-butyl)dimethylsilyloxy)phenyl)-1-(3-methylbutanoyl)-3-phenylindoline-3-carbonitrile **35**

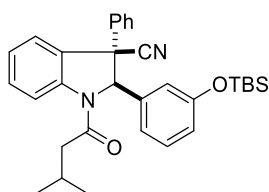

Prepared according to general procedure 2 using indoline **23** (1 eq.), isovaleryl chloride (2 eq.), and pyridine (2 eq.) in CH<sub>2</sub>Cl<sub>2</sub> (0.2 M). Purification by flash pressure column chromatography (SiO<sub>2</sub>, EtOAc/PE 1:19) afforded the title compound as a white solid (88% yield).

<sup>1</sup>H NMR (400 MHz, CDCl<sub>3</sub>): δ 0.09 (s, 3H), 0.10 (s, 3H), 0.70 (d, *J* = 6.4 Hz, 3H), 0.79 (d, *J* = 6.4 Hz, 3H), 0.93 (s, 9H), 1.83-2.21 (m, 3H), 5.27 (br. s, 1H), 6.64 (t, *J* = 1.9 Hz, 1H), 6.84-6.90 (m, 2H), 7.20-7.27 (m, 3H), 7.29 (d, *J* = 8.0 Hz, 1H), 7.32-7.43 (m, 4H), 7.47-7.53 (m, 1H), 8.44 (br. s, 1H).

<sup>13</sup>C NMR (125.75 MHz, CDCl<sub>3</sub>): δ -4.5, 18.2, 22.2, 22.4, 25.2, 25.7, 27.8, 44.3, 57.5, 75.7, 117.3, 117.7, 118.5, 119.5, 121.7, 125.4, 125.5, 125.7, 128.8, 128.9, 129.5, 130.5, 130.7, 138.9, 140.2, 143.3, 156.5, 171.3.

HRMS (ESI<sup>+</sup>, *m/z*): [C<sub>32</sub>H<sub>39</sub>O<sub>2</sub>N<sub>2</sub>Si]<sup>+</sup> (*M*+H)<sup>+</sup> calc. 511.2786, found 511.2769.



(2*RS*,3*RS*)-2-(3-((Tert-butyl dimethylsilyl)oxy)phenyl)-1-(furan-2-carbonyl)-3-phenylindoline-3-carbonitrile **36**

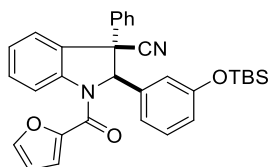

Prepared according to general procedure 2 using indoline **23** (1 eq.), 2-furoyl chloride (2 eq.), and pyridine (2 eq.) in CH<sub>2</sub>Cl<sub>2</sub> (0.2 M). Purification by flash pressure column chromatography (SiO<sub>2</sub>, EtOAc/PE 1:9) afforded the title compound as a white solid (76% yield).

<sup>1</sup>H NMR (400 MHz, CDCl<sub>3</sub>): δ 0.06 (s, 3H), 0.08 (s, 3H), 0.91 (s, 9H), 6.01 (s, 1H), 6.36 (dd, *J* = 3.6 Hz, *J* = 1.8 Hz, 1H), 6.65 (t, *J* = 2.0 Hz, 1H), 6.81 (ddd, *J* = 8.2 Hz, *J* = 2.4 Hz, *J* = 0.9 Hz, 1H), 6.87 (d, *J* = 7.7 Hz, 1H), 7.01 (dd, *J* = 3.5 Hz, *J* = 0.8 Hz, 1H), 7.22 (t, *J* = 7.9 Hz, 1H), 7.27 (td, *J* = 7.7 Hz, *J* = 0.9 Hz, 1H), 7.31-7.35 (m, 2H), 7.35-7.43 (m, 5H), 7.50-7.56 (m, 1H), 8.37 (d, *J* = 7.6 Hz, 1H).

<sup>13</sup>C NMR (100.6 MHz, CDCl<sub>3</sub>): δ -4.5, 18.2, 25.7, 58.1, 75.6, 111.9, 117.6, 118.0, 118.4, 118.5, 119.5, 121.3, 125.7, 125.7, 126.0, 128.8, 129.4, 129.5, 130.2, 130.6, 139.5, 140.0, 143.6, 144.7, 147.1, 156.2, 157.8.

HRMS (ESI<sup>+</sup>, *m/z*): [C<sub>32</sub>H<sub>33</sub>O<sub>3</sub>N<sub>2</sub>Si]<sup>+</sup> (M+H)<sup>+</sup> calc. 521.2250, found 521.2250.

(2*RS*,3*RS*)-2-(3-((Tert-butyl dimethylsilyl)oxy)phenyl)-3-phenyl-1-(4-(trifluoromethyl)benzoyl)indoline-3-carbonitrile **37**

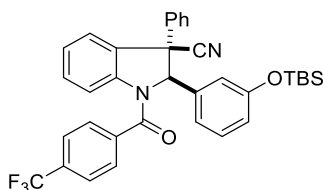

Prepared according to general procedure 2 using indoline **23** (1 eq.), 4-trifluoromethyl benzoyl chloride (2 eq.), and pyridine (2 eq.) in CH<sub>2</sub>Cl<sub>2</sub> (0.2 M). Purification by flash pressure column chromatography (SiO<sub>2</sub>, EtOAc/PE 1:19) afforded the title compound as a white solid (73% yield).

<sup>1</sup>H NMR (500 MHz, CDCl<sub>3</sub>): δ 0.06 (s, 3H), 0.07 (s, 3H), 0.91 (s, 9H), 5.15 (br. s, 1H), 6.46 (s, 1H), 6.62 (br. s, 1H), 6.84 (ddd, *J* = 8.1 Hz, *J* = 2.3 Hz, *J* = 0.7 Hz, 1H), 7.08-7.24 (m, 3H), 7.26-7.33 (m, 3H), 7.39-7.45 (m, 4H), 7.46-7.57 (m, 3H), 8.24 (br. s, 1H).

<sup>13</sup>C NMR (125.75 MHz, CDCl<sub>3</sub>): δ -4.6, -4.5, 18.2, 25.6, 57.2, 77.1, 117.6, 118.3, 119.5, 121.6, 123.6 (q, *J* = 272.1 Hz), 125.5, 125.6, 126.1, 126.3, 127.2, 128.3 (q, *J* = 6.3 Hz), 129.1, 129.6, 129.9, 130.4, 130.6, 132.4 (q, *J* = 32.6 Hz), 138.5, 139.0, 139.4, 142.7, 156.3, 168.1.

HRMS (ESI<sup>+</sup>, *m/z*): [C<sub>35</sub>H<sub>34</sub>O<sub>2</sub>N<sub>2</sub>Si]<sup>+</sup> (M+H)<sup>+</sup> calc. 599.2347, found 599.2329.

Ethyl (2*RS*,3*RS*)-2-(3-((tert-butyldimethylsilyl)oxy)phenyl)-3-cyano-3-phenylindoline-1-carboxylate **38**

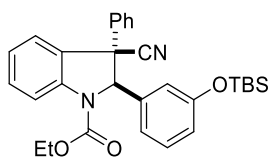

Prepared according to general procedure 2 using indoline **23** (1 eq.), ethyl chloroformate (2 eq.), and pyridine (2 eq.) in CH<sub>2</sub>Cl<sub>2</sub> (0.2 M). Purification by flash pressure column chromatography (SiO<sub>2</sub>, EtOAc/PE 1:19) afforded the title compound as a white solid (97% yield).

<sup>1</sup>H NMR (400 MHz, CDCl<sub>3</sub>): δ 0.09 (s, 3H), 0.11 (s, 3H), 0.93 (s, 9H), 1.08 (br. s, 3H), 4.01-4.19 (m, 2H), 5.33 (s, 1H), 6.63 (t, *J* = 2.0 Hz, 1H), 6.82-6.87 (m, 2H), 7.17 (td, *J* = 7.6 Hz, *J* = 1.0 Hz, 1H), 7.21-7.29 (m, 3H), 7.30-7.34 (m, 1H), 7.35-7.43 (m, 3H), 7.48 (ddd, *J* = 8.8 Hz, *J* = 7.5 Hz, *J* = 1.3 Hz, 1H), 8.02 (br. s, 1H).

<sup>13</sup>C NMR (100.6 MHz, CDCl<sub>3</sub>): δ -4.5, 14.1, 18.2, 25.7, 56.8, 62.1, 75.0, 115.1, 117.5, 118.7, 119.4, 121.1, 124.4, 125.8, 125.9, 128.7, 128.8, 129.4, 130.0, 130.7, 139.5, 140.6, 142.6, 152.5, 156.1.

HRMS (ESI<sup>+</sup>, *m/z*): [C<sub>30</sub>H<sub>35</sub>O<sub>3</sub>N<sub>2</sub>Si]<sup>+</sup> (M+H)<sup>+</sup> calc. 499.2412, found 499.2399.

(2*RS*,3*RS*)-1-Benzoyl-2-(3-hydroxyphenyl)-3-phenylindoline-3-carbonitrile **39**

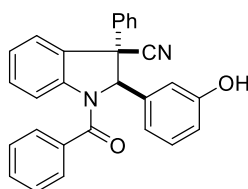

Prepared according to general procedure 3 to afford the title compound after column chromatography (SiO<sub>2</sub>, EtOAc/PE 1:3) as a white solid (81% yield).

<sup>1</sup>H NMR (700 MHz, CDCl<sub>3</sub>): δ 5.30 (s, 1H), 5.33 (br. s, 1H), 6.52 (br. s, 1H), 6.61 (br. s, 1H), 6.76 (dd, *J* = 8.0 Hz, *J* = 2.4 Hz, 1H), 7.10-7.19 (m, 3H), 7.19-7.32 (m, 6H), 7.35-7.45 (m, 6H).

<sup>13</sup>C NMR (125.75 MHz, CDCl<sub>3</sub>): δ 57.0, 60.5, 113.3, 116.5, 117.2, 118.6, 118.9, 125.7, 125.8, 126.0, 126.9, 128.5, 129.0, 129.5, 129.9, 130.3, 130.4, 130.8, 135.5, 139.1, 139.5, 142.9, 156.1, 169.6.

HRMS (ESI<sup>+</sup>, *m/z*): [C<sub>28</sub>H<sub>20</sub>N<sub>2</sub>NaO<sub>2</sub>]<sup>+</sup> (*M*+Na)<sup>+</sup> calc. 439.1417, found 439.1425.

**(2*RS*,3*RS*)-2-(3-Hydroxyphenyl)-1-(3-methylbutanoyl)-3-phenylindoline-3-carbonitrile 40**

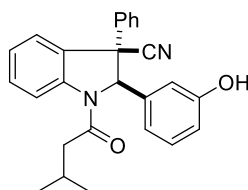

Prepared according to general procedure 3 to afford the title compound after column chromatography (SiO<sub>2</sub>, EtOAc/PE 1:3) as a white solid (62% yield).

<sup>1</sup>H NMR (500 MHz, CDCl<sub>3</sub>): δ 0.73 (d, *J* = 5.7 Hz, 3H), 0.80 (d, *J* = 5.7 Hz, 3H), 1.82-2.22 (m, 3H), 5.32 (br. s, 1H), 5.71 (br. s, 1H), 6.70 (t, *J* = 1.9 Hz, 1H), 6.84 (d, *J* = 7.7 Hz, 1H), 6.87 (dd, *J* = 8.2 Hz, *J* = 2.1 Hz, 1H), 7.24 (td, *J* = 7.5 Hz, *J* = 1.0 Hz, 1H), 7.25-7.28 (m, 2H), 7.29-7.32 (m, 1H), 7.35 (d, *J* = 7.5 Hz, 1H), 7.38-7.44 (m, 3H), 7.49 (ddd, *J* = 8.2 Hz, *J* = 7.5 Hz, *J* = 1.3 Hz, 1H), 8.44 (br. s, 1H).

<sup>13</sup>C NMR (125.75 MHz, CDCl<sub>3</sub>): δ 22.2, 22.4, 25.3, 44.3, 75.7, 113.0, 116.8, 117.4, 118.6, 118.7, 125.5, 125.6, 125.7, 125.8, 128.9, 129.6, 130.7, 130.8, 139.1, 140.2, 143.0, 156.6, 171.6.<sup>†</sup>

<sup>†</sup> 1 peak obscured.

HRMS (ESI<sup>+</sup>, *m/z*): [C<sub>26</sub>H<sub>25</sub>O<sub>2</sub>N<sub>2</sub>]<sup>+</sup> (*M*+H)<sup>+</sup> calc. 397.1911, found 397.1902.

(2*RS*,3*RS*)-1-(Furan-2-carbonyl)-2-(3-hydroxyphenyl)-3-phenylindoline-3-carbonitrile **41**

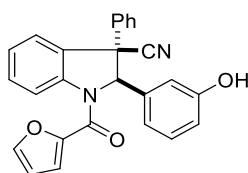

Prepared according to general procedure 3 to afford the title compound after column chromatography (SiO<sub>2</sub>, EtOAc/PE 1:3) as a white solid (71% yield).

<sup>1</sup>H NMR (500 MHz, CDCl<sub>3</sub>): δ 5.43 (s, 1H), 6.05 (s, 1H), 6.38 (dd, *J* = 3.5 Hz, *J* = 1.7 Hz, 1H), 6.71 (t, *J* = 2.0 Hz, 1H), 6.79 (ddd, *J* = 8.1 Hz, *J* = 2.4 Hz, *J* = 0.7 Hz, 1H), 6.84 (d, *J* = 7.7 Hz, 1H), 7.03 (dd, *J* = 3.5 Hz, *J* = 0.7 Hz, 1H), 7.23 (t, *J* = 7.9 Hz, 1H), 7.28 (td, *J* = 7.6 Hz, *J* = 0.9 Hz, 1H), 7.32-7.44 (m, 7H), 7.51 (ddd, *J* = 8.8 Hz, *J* = 7.5 Hz, *J* = 1.3 Hz, 1H), 8.35 (br. s, 1H).

<sup>13</sup>C NMR (125.75 MHz, CDCl<sub>3</sub>): δ 58.0, 75.6, 112.0, 116.4, 118.0, 118.6, 118.6, 118.8, 125.7, 125.8, 126.1, 128.9, 129.2, 129.6, 130.4, 130.7, 139.8, 140.0, 143.3, 144.8, 146.9, 156.2, 157.9.<sup>†</sup>

<sup>†</sup> 1 peak obscured.

HRMS (ESI<sup>+</sup>, *m/z*): [C<sub>26</sub>H<sub>18</sub>N<sub>2</sub>NaO<sub>3</sub>]<sup>+</sup> (*M*+Na)<sup>+</sup> calc. 429.1210, found 429.1219.

(2*RS*,3*RS*)-2-(3-Hydroxyphenyl)-3-phenyl-1-(4-(trifluoromethyl)benzoyl)indoline-3-carbonitrile **42**

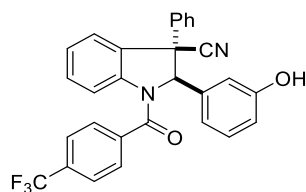

Prepared according to general procedure 3 to afford the title compound after column chromatography (SiO<sub>2</sub>, EtOAc/PE 1:4) as a white solid (99% yield).

<sup>1</sup>H NMR (400 MHz, CDCl<sub>3</sub>): δ 5.24 (s, 1H), 5.32 (s, 1H), 6.53 (s, 1H), 6.59 (br. s, 1H), 6.80 (dd, *J* = 7.7 Hz, *J* = 2.0 Hz, 1H), 7.12-7.61 (m, 13H), 8.29 (br. s, 1H).

<sup>13</sup>C NMR (100.6 MHz, CDCl<sub>3</sub>): δ = 57.1, 77.1, 113.1, 116.7, 118.4, 123.5 (q, *J* = 273.3), 125.6, 126.1, 126.3, 127.2, 128.3, 129.1, 129.7, 129.7, 129.8, 130.5, 130.7, 132.5 (q, *J* = 33.5), 138.8, 138.9, 139.4, 142.5, 149.9, 156.3, 168.2.

HRMS (ESI<sup>+</sup>, *m/z*): [C<sub>29</sub>H<sub>19</sub>F<sub>3</sub>N<sub>2</sub>NaO<sub>2</sub>]<sup>+</sup> (M+Na)<sup>+</sup> calc. 507.1291, found 507.1301.

Ethyl (2*RS*,3*RS*)-3-cyano-2-(3-hydroxyphenyl)-3-phenylindoline-1-carboxylate **43**

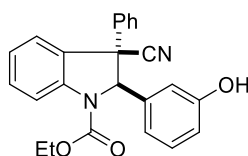

Prepared according to general procedure 3 to afford the title compound after column chromatography (SiO<sub>2</sub>, EtOAc/PE 1:4) as a white solid (81% yield).

<sup>1</sup>H NMR (400 MHz, CDCl<sub>3</sub>): δ 1.12 (br. s, 3H), 4.04-4.26 (m, 2H), 5.38 (s, 1H), 5.51 (br. s, 1H), 6.69 (t, *J* = 2.2 Hz, 1H), 6.77-6.83 (m, 2H), 7.19 (td, *J* = 7.6 Hz, *J* = 1.0 Hz, 1H), 7.23 (t, *J* = 7.9 Hz, 1H), 7.26-7.32 (m, 2H), 7.32-7.35 (m, 1H), 7.38-7.45 (m, 3H), 7.46-7.51 (m, 1H), 8.02 (br. s, 1H).

<sup>13</sup>C NMR (100.6 MHz, CDCl<sub>3</sub>): δ 14.1, 56.8, 62.3, 75.1, 112.9, 115.2, 116.3, 118.5, 118.8, 124.5, 125.7, 126.0, 128.6, 128.7, 129.5, 130.3, 130.8, 139.8, 140.5, 142.4, 152.6, 156.2.

HRMS (ESI<sup>+</sup>, *m/z*): [C<sub>24</sub>H<sub>21</sub>O<sub>3</sub>N<sub>2</sub>]<sup>+</sup> (M+H)<sup>+</sup> calc. 385.1558, found 385.1542.

(2*RS*,3*RS*)-1-Acetyl-2-(3-(4-bromobutoxy)phenyl)-3-phenylindoline-3-carbonitrile **44**

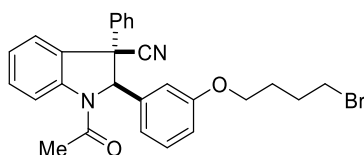

Prepared according to general procedure 4 to afford the title compound after column chromatography (SiO<sub>2</sub>, EtOAc/PE 3:17) as a white solid (89% yield, contains minor impurities).

<sup>1</sup>H NMR (700 MHz, CDCl<sub>3</sub>): δ 1.91-2.10 (m, 7H), 3.50 (t, *J* = 6.5 Hz, 2H), 3.94-4.00 (m, 2H), 5.27 (br. s, 1H), 6.75 (s, 1H), 6.83 (d, *J* = 7.6 Hz, 1H), 6.93 (d, *J* = 7.4 Hz, 1H), 7.25 (t, *J* = 7.7 Hz, 1H), 7.27-7.29 (m, 2H), 7.32-7.37 (m, 2H), 7.38-7.45 (m, 3H), 7.52 (t, *J* = 7.8 Hz, 1H), 8.45 (br. s, 1H).

<sup>13</sup>C NMR (176.05 MHz, CDCl<sub>3</sub>): δ 24.2, 27.8, 29.4, 33.4, 57.6, 66.9, 76.4, 112.9, 115.0, 117.3, 118.5, 118.6, 125.5, 125.6, 125.7, 128.9, 129.6, 130.7, 130.8, 138.9, 140.4, 143.0, 143.0, 159.5, 169.1.

HRMS (ESI<sup>+</sup>, *m/z*): [C<sub>27</sub>H<sub>25</sub><sup>79</sup>BrN<sub>2</sub>NaO<sub>2</sub>]<sup>+</sup> (*M*+Na)<sup>+</sup> calc. 511.0992, found 511.0999.

(2*RS*,3*RS*)-1-Acetyl-2-(3-((5-bromopentyl)oxy)phenyl)-3-phenylindoline-3-carbonitrile **45**

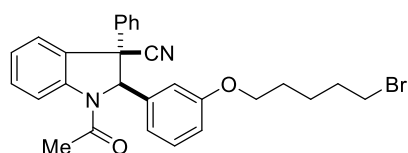

Prepared according to general procedure 4 to afford the title compound after column chromatography (SiO<sub>2</sub>, EtOAc/PE 3:17) as a white solid (94% yield).

<sup>1</sup>H NMR (500 MHz, CDCl<sub>3</sub>): δ 1.59-1.67 (m, 2H), 1.78-1.84 (m, 2H), 1.95 (tt, *J* = 7.6 Hz, *J* = 6.9 Hz, 2H), 1.99 (br. s, 3H, Ac), 3.46 (t, *J* = 6.8 Hz, 2H), 3.95 (td, *J* = 6.2 Hz, *J* = 2.3 Hz, 2H), 5.28 (br. s, 1H), 6.75 (s, 1H), 6.83 (d, *J* = 7.6 Hz, 1H), 6.93 (dd, *J* = 8.2 Hz, *J* = 2.1 Hz, 1H), 7.25 (td, *J* = 7.6 Hz, *J* = 0.9 Hz, 1H), 7.27-7.28 (m, 1H), 7.29-7.30 (m, 1H), 7.32-7.37 (m, 2H), 7.39-7.45 (m, 3H), 7.52 (ddd, *J* = 8.2 Hz, *J* = 7.5 Hz, *J* = 1.3 Hz, 1H), 8.44 (br. s, 1H).

<sup>13</sup>C NMR (125.75 MHz, CDCl<sub>3</sub>): δ 24.2, 24.8, 28.3, 29.3, 32.5, 33.6, 57.6, 67.6, 112.9, 115.1, 117.3, 118.5, 118.5, 125.5, 125.6, 125.8, 125.8, 125.9, 129.6, 130.7, 130.7, 138.8, 140.4, 143.0, 159.6, 169.1.

HRMS (ESI<sup>+</sup>, *m/z*): [C<sub>28</sub>H<sub>28</sub>O<sub>2</sub>N<sub>2</sub><sup>79</sup>Br]<sup>+</sup> (*M*+H)<sup>+</sup> calc. 503.1329, found 503.1324.

(2*RS*,3*RS*)-1-Acetyl-2-(3-((6-bromohexyl)oxy)phenyl)-3-phenylindoline-3-carbonitrile **46**

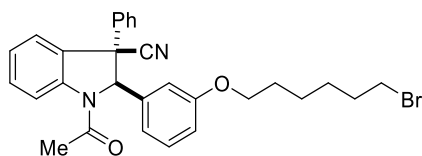

Prepared according to general procedure 4 to afford the title compound after column chromatography (SiO<sub>2</sub>, EtOAc/PE 3:17) as a white solid (85% yield, contains minor impurities).

<sup>1</sup>H NMR (500 MHz, CDCl<sub>3</sub>): δ 1.45-1.54 (m, 4H), 1.74-1.82 (m, 2H), 1.86-1.93 (m, 2H), 1.97 (br. s, 3H), 3.43 (t, *J* = 6.8 Hz, 2H), 3.88-3.96 (m, 2H), 5.26 (br. s, 1H), 6.74 (br. s, 1H), 6.81 (d, *J* = 7.7 Hz, 1H), 6.92 (dd, *J* = 8.4 Hz, *J* = 2.3 Hz, 1H), 7.23 (td, *J* = 7.5 Hz, *J* = 0.8 Hz, 1H), 7.25-7.28 (m, 2H), 7.30-7.35 (m, 2H), 7.37-7.43 (m, 3H), 7.51 (ddd, *J* = 8.2 Hz, *J* = 7.7 Hz, *J* = 1.4 Hz, 1H), 8.42 (br. s, 1H).

<sup>13</sup>C NMR (125.75 MHz, CDCl<sub>3</sub>): δ 24.2, 25.3, 27.9, 29.0, 32.7, 33.8, 57.6, 67.8, 76.5, 112.9, 115.0, 117.3, 118.4, 118.5, 125.5, 125.6, 125.8, 128.2, 128.9, 129.6, 130.6, 130.7, 138.8, 140.4, 143.0, 159.7, 169.1.

HRMS (ESI<sup>+</sup>, *m/z*): [C<sub>29</sub>H<sub>29</sub><sup>79</sup>BrN<sub>2</sub>NaO<sub>2</sub>]<sup>+</sup> (M+Na)<sup>+</sup> calc. 539.1305, found 539.1311.

**(2RS,3RS)-1-Acetyl-2-(3-((7-bromoheptyl)oxy)phenyl)-3-phenylindoline-3-carbonitrile 47**

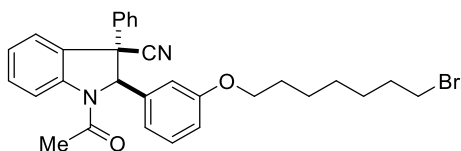

Prepared according to general procedure 4 to afford the title compound after column chromatography (SiO<sub>2</sub>, EtOAc/PE 3:17) as a white solid (89% yield).

<sup>1</sup>H NMR (500 MHz, CDCl<sub>3</sub>): δ 1.34-1.42 (2H, m), 1.42-1.52 (4H, m), 1.76 (2H, quin, *J* = 6.9 Hz), 1.88 (2H, quin, *J* = 6.9 Hz), 1.97 (3H, br. s), 3.43 (2H, t, *J* = 6.8 Hz), 3.91 (2H, m), 5.26 (1H, br. s), 6.74 (1H, s), 6.81 (1H, d, *J* = 7.7 Hz), 6.92 (1H, dd, *J* = 8.2, 2.0 Hz), 7.20-7.29 (3H, m), 7.30-7.35 (2H, m), 7.37-7.44 (3H, m), 7.51 (1H, m), 8.43 (1H, br. s).

<sup>13</sup>C NMR (125.75 MHz, CDCl<sub>3</sub>): δ 24.2, 25.9, 28.1, 28.5, 29.1, 32.7, 34.0, 57.6, 67.9, 76.5, 112.9, 115.0, 117.3, 118.3, 118.5, 125.5, 125.6, 125.8, 128.7, 128.9, 129.6, 130.6, 130.7, 138.8, 140.4, 143.0, 159.7, 169.1.

HRMS (ESI<sup>+</sup>, *m/z*): [C<sub>30</sub>H<sub>31</sub><sup>79</sup>BrN<sub>2</sub>NaO<sub>2</sub>]<sup>+</sup> (M+Na)<sup>+</sup> calc. 553.1461, found 553.1469.

(2*RS*,3*RS*)-1-Acetyl-2-(3-((8-bromooctyl)oxy)phenyl)-3-phenylindoline-3-carbonitrile **48**

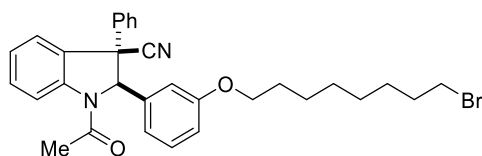

Prepared according to general procedure 4 to afford the title compound after column chromatography (SiO<sub>2</sub>, EtOAc/PE 3:17) as a white solid (86% yield).

**<sup>1</sup>H NMR (500 MHz, CDCl<sub>3</sub>):** δ 1.33-1.42 (m, 4H), 1.42-1.52 (m, 4H), 1.77 (tt, *J* = 7.4 Hz, *J* = 6.9 Hz, 2H), 1.89 (tt, *J* = 7.4 Hz, *J* = 6.9 Hz, 2H), 1.99 (br. s, 3H, Ac), 3.44 (t, *J* = 6.9 Hz, 2H), 3.93 (td, *J* = 6.5 Hz, *J* = 2.1 Hz, 2H), 5.27 (br. s, 1H), 6.76 (s, 1H), 6.82 (d, *J* = 7.7 Hz, 1H), 6.94 (dd, *J* = 8.2 Hz, *J* = 2.1 Hz, 1H), 7.25 (td, *J* = 7.6 Hz, *J* = 0.7 Hz, 1H), 7.27-7.30 (m, 2H), 7.31-7.37 (m, 2H), 7.38-7.45 (m, 3H), 7.52 (td, *J* = 7.9 Hz, *J* = 1.2 Hz, 1H), 8.44 (br. s, 1H).

**<sup>13</sup>C NMR (125.75 MHz, CDCl<sub>3</sub>):** δ 24.2, 25.9, 28.1, 28.7, 29.1, 29.2, 29.7, 32.8, 34.0, 57.6, 68.0, 112.9, 115.0, 117.3, 118.3, 118.5, 125.5, 125.6, 125.8, 128.9, 129.6, 129.6, 130.6, 130.7, 138.8, 140.4, 143.0, 159.8, 169.1.

**HRMS (ESI<sup>+</sup>, *m/z*):** [C<sub>31</sub>H<sub>34</sub>O<sub>2</sub>N<sub>2</sub><sup>79</sup>Br]<sup>+</sup> (M+H)<sup>+</sup> calc. 545.1798, found 545.1789.

(2*RS*,3*RS*)-1-acetyl-2-(3-((9-bromononyl)oxy)phenyl)-3-phenylindoline-3-carbonitrile **49**

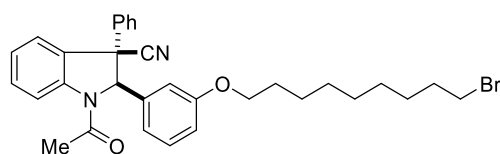

Prepared according to general procedure 4 to afford the title compound after column chromatography (SiO<sub>2</sub>, EtOAc/PE 3:17) as a white solid (71% yield).

**<sup>1</sup>H NMR (700 MHz, CDCl<sub>3</sub>):** δ 1.30-1.38 (m, 6H), 1.40-1.48 (m, 4H), 1.72-1.79 (m, 2H), 1.84-1.90 (m, 2H), 1.97 (s, 3H), 3.42 (t, *J* = 6.8 Hz, 2H), 3.88-3.94 (m, 2H), 5.26 (s, 1H), 6.74 (s, 1H), 6.80 (d, *J* = 7.8 Hz, 1H), 6.92 (d, *J* = 8.5 Hz, 1H), 7.23 (t, *J* = 7.5 Hz, 1H), 7.25-7.28 (m, 2H), 7.29-7.35 (m, 2H), 7.36-7.43 (m, 3H), 7.50 (t, *J* = 7.9 Hz, 1H), 8.43 (br. s, 1H).



<sup>13</sup>C NMR (176.05 MHz, CDCl<sub>3</sub>): δ 24.1, 26.0, 28.1, 28.7, 29.2, 29.3, 29.3, 32.8, 34.0, 57.6, 68.0, 76.5, 112.9, 115.0, 117.3, 118.3, 118.5, 125.5, 125.6, 125.7, 128.7, 128.9, 129.6, 130.6, 130.7, 138.8, 140.4, 143.1, 159.8, 169.1.

HRMS (ESI<sup>+</sup>, m/z): [C<sub>32</sub>H<sub>35</sub><sup>79</sup>BrN<sub>2</sub>NaO<sub>2</sub>]<sup>+</sup> (M+Na)<sup>+</sup> calc. 581.1774, found 581.1777.

(2*RS*,3*RS*)-1-Benzoyl-2-(3-((7-bromoheptyl)oxy)phenyl)-3-phenylindoline-3-carbonitrile **50**

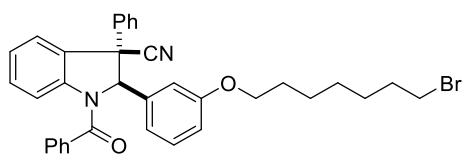

Prepared according to general procedure 4 to afford the title compound after column chromatography (SiO<sub>2</sub>, EtOAc/PE 3:17) as a white solid (74% yield, contains minor impurities).

<sup>1</sup>H NMR (700 MHz, CDCl<sub>3</sub>): δ 1.36-1.42 (m, 2H), 1.42-1.52 (m, 4H), 1.71-1.78 (m, 2H), 1.86-1.92 (m, 2H), 3.44 (t, *J* = 6.8 Hz, 2H), 3.83-3.91 (m, 2H), 5.36 (s, 1H), 6.57 (s, 1H), 6.65 (s, 1H), 6.87 (dd, *J* = 8.2 Hz, *J* = 2.0 Hz, 1H), 7.01-7.51 (m, 15H).

<sup>13</sup>C NMR (176.05 MHz, CDCl<sub>3</sub>): δ 25.9, 28.1, 28.5, 29.0, 32.7, 34.0, 57.0, 67.8, 77.2, 112.9, 115.1, 117.3, 118.5, 118.6, 125.7, 126.0, 126.9, 128.4, 128.5, 128.9, 129.5, 130.0, 130.1, 130.4, 130.7, 135.6, 138.9, 139.6, 143.0, 159.3, 169.5.

HRMS (ESI<sup>+</sup>, m/z): [C<sub>35</sub>H<sub>34</sub>O<sub>2</sub>N<sub>2</sub><sup>79</sup>Br]<sup>+</sup> (M+H)<sup>+</sup> calc. 593.1798, found 593.1792.

(2*RS*,3*RS*)-2-(3-((7-Bromoheptyl)oxy)phenyl)-1-(3-methylbutanoyl)-3-phenylindoline-3-carbonitrile **52**

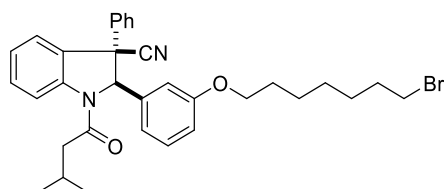

Prepared according to general procedure 4 to afford the title compound after column chromatography (SiO<sub>2</sub>, EtOAc/PE 1:9) as a white solid (73% yield).

**<sup>1</sup>H NMR (700 MHz, CDCl<sub>3</sub>):** δ 0.69-0.88 (m, 6H), 1.36-1.42 (m, 2H), 1.44-1.52 (m, 4H), 1.74-1.80 (m, 2H), 1.85-2.00 (m, 3H), 2.01-2.21 (m, 2H), 3.44 (t, *J* = 6.9 Hz, 2H), 3.90-3.96 (m, 2H), 5.32 (s, 1H), 6.74 (s, 1H), 6.81 (d, *J* = 7.6 Hz, 1H), 6.92 (dd, *J* = 8.1 Hz, *J* = 1.6 Hz, 1H), 7.24 (t, *J* = 7.5 Hz, 1H), 7.26-7.29 (m, 2H), 7.32 (t, *J* = 7.9 Hz, 1H), 7.35 (d, *J* = 7.7 Hz, 1H), 7.36-7.43 (m, 3H), 7.52 (t, *J* = 7.9 Hz, 1H), 8.47 (br. s, 1H).

**<sup>13</sup>C NMR (176.05 MHz, CDCl<sub>3</sub>):** δ 22.2, 22.4, 25.3, 25.8, 28.1, 28.5, 29.0, 32.7, 33.9, 44.3, 57.5, 67.9, 75.8, 112.9, 115.1, 117.4, 118.5, 118.6, 125.4, 125.5, 125.7, 128.1, 128.9, 129.5, 130.5, 130.7, 139.0, 140.4, 143.2, 159.7, 171.3.

**HRMS (ESI<sup>+</sup>, *m/z*):** [C<sub>33</sub>H<sub>38</sub>O<sub>2</sub>N<sub>2</sub><sup>79</sup>Br]<sup>+</sup> (M+H)<sup>+</sup> calc. 573.2111, found 573.2104.

(2*RS*,3*RS*)-2-(3-((7-Bromoheptyl)oxy)phenyl)-1-(furan-2-carbonyl)-3-phenylindoline-3-carbonitrile **53**

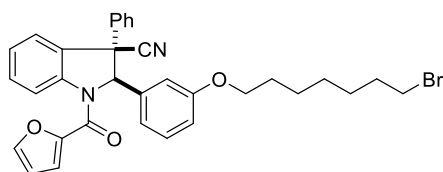

Prepared according to general procedure 4 to afford the title compound after column chromatography (SiO<sub>2</sub>, EtOAc/PE 1:4) as a white solid (66% yield).

**<sup>1</sup>H NMR (700 MHz, CDCl<sub>3</sub>):** δ 1.36-1.41 (m, 2H), 1.42-1.51 (m, 4H), 1.72-1.78 (m, 2H), 1.86-1.92 (m, 2H), 3.43 (t, *J* = 6.9 Hz, 2H), 3.85-3.92 (m, 2H), 6.05 (s, 1H), 6.38 (dd, *J* = 3.5 Hz, *J* = 1.7 Hz, 1H), 6.74 (t, *J* = 1.8 Hz, 1H), 6.83 (d, *J* = 7.7 Hz, 1H), 6.85 (dd, *J* = 8.2 Hz, *J* = 2.0 Hz, 1H), 7.02 (d, *J* = 3.5 Hz, 1H), 7.26 (t, *J* = 7.9 Hz, 1H), 7.27-7.30 (m, 1H), 7.33-7.36 (m, 2H), 7.36-7.40 (m, 3H), 7.40-7.44 (m, 2H), 7.54 (t, *J* = 7.9 Hz, 1H), 8.36 (br. s, 1H).

**<sup>13</sup>C NMR (176.05 MHz, CDCl<sub>3</sub>):** δ 25.8, 28.1, 28.5, 29.0, 32.7, 34.0, 58.0, 67.9, 75.8, 111.9, 112.7, 114.9, 118.0, 118.3, 118.4, 118.6, 125.7, 125.7, 126.0, 128.8, 129.3, 129.5, 130.1, 130.6, 139.5, 140.1, 143.5, 144.7, 147.1, 157.8, 159.4.

**HRMS (ESI<sup>+</sup>, *m/z*):** [C<sub>33</sub>H<sub>32</sub>O<sub>3</sub>N<sub>2</sub><sup>79</sup>Br]<sup>+</sup> (M+H)<sup>+</sup> calc. 583.1591, found 583.1585.

(2*RS*,3*RS*)-2-(3-((7-bromoheptyl)oxy)phenyl)-3-phenyl-1-(4-(trifluoromethyl)benzoyl)indoline-3-carbonitrile **54**

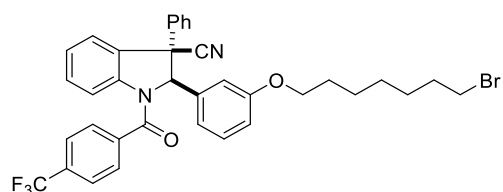

Prepared according to general procedure 4 to afford the title compound after column chromatography (SiO<sub>2</sub>, EtOAc/PE 1:9) as a white solid (86% yield).

<sup>1</sup>H NMR (500 MHz, CDCl<sub>3</sub>): δ 1.35-1.53 (m, 6H), 1.71-1.79 (m, 2H), 1.90 (tt, *J* = 7.3 Hz, *J* = 6.8 Hz, 2H), 3.44 (t, *J* = 6.8 Hz, 2H), 3.79-3.90 (m, 2H), 5.21 (br. s, 1H), 6.49 (br. s, 1H), 6.62 (br. s, 1H), 6.89 (dd, *J* = 8.2 Hz, *J* = 2.0 Hz, 1H), 7.14-7.35 (m, 6H), 7.40-7.47 (m, 4H), 7.47-7.57 (m, 3H), 8.22 (br. s, 1H).

<sup>13</sup>C NMR (125.75 MHz, CDCl<sub>3</sub>): δ 25.8, 28.1, 28.5, 29.0, 32.7, 34.0, 57.1, 60.4, 67.9, 112.9, 115.3, 117.5, 118.4, 123.6 (q, *J* = 274.0 Hz), 125.5, 125.6, 126.1, 126.3, 127.2, 129.1, 129.6, 129.9, 130.3, 130.7, 132.3 (q, *J* = 29.7 Hz), 138.6, 139.0, 139.6, 142.6, 159.5, 168.1.

HRMS (ESI<sup>+</sup>, *m/z*): [C<sub>36</sub>H<sub>33</sub>O<sub>2</sub>N<sub>2</sub><sup>79</sup>BrF<sub>3</sub>]<sup>+</sup> (M+H)<sup>+</sup> calc. 661.1672, found 661.1664.

Ethyl (2*RS*,3*RS*)-2-(3-((7-bromoheptyl)oxy)phenyl)-3-cyano-3-phenylindoline-1-carboxylate **55**

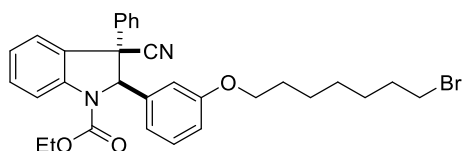

Prepared according to general procedure 4 to afford the title compound after column chromatography (SiO<sub>2</sub>, EtOAc/PE 1:8) as a white solid (56% yield).

<sup>1</sup>H NMR (700 MHz, CDCl<sub>3</sub>): δ 1.11 (br. s, 3H), 1.36-1.42 (m, 2H), 1.44-1.53 (m, 4H), 1.74-1.81 (m, 2H), 1.86-1.93 (m, 2H), 3.44 (t, *J* = 6.8 Hz, 2H), 3.91-3.96 (m, 2H), 4.05-4.23 (m, 2H), 5.38 (s, 1H), 6.76 (s, 1H), 6.81 (d, *J* = 7.6 Hz, 1H), 6.90 (dd, *J* = 8.2 Hz, *J* = 2.1 Hz, 1H), 7.19 (t, *J* = 7.5 Hz, 1H), 7.27-7.31 (m, 3H), 7.33 (d, *J* = 7.5 Hz, 1H), 7.36-7.44 (m, 3H), 7.50 (t, *J* = 7.8 Hz, 1H), 8.04 (br. s, 1H).

<sup>13</sup>C NMR (176.05 MHz, CDCl<sub>3</sub>): δ 14.2, 25.9, 28.1, 28.5, 29.1, 32.7, 34.0, 56.8, 62.1, 67.8, 75.3, 112.8, 114.7, 115.2, 118.3, 118.8, 124.4, 125.8, 125.9, 128.7, 128.7, 129.4, 130.0, 130.7, 139.6, 140.7, 142.5, 152.5, 159.4.

**HRMS (ESI<sup>+</sup>, m/z):** [C<sub>31</sub>H<sub>34</sub>O<sub>3</sub>N<sub>2</sub><sup>79</sup>Br]<sup>+</sup> (M+H)<sup>+</sup> calc. 561.1747, found 561.1740.

(2*RS*,3*RS*)-1-Acetyl-3-phenyl-2-(3-(4-(pyrrolidin-1-yl)butoxy)phenyl)indoline-3-carbonitrile **56**

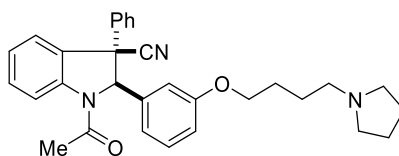

Prepared according to general procedure 5 to afford the title compound as a highly hygroscopic colourless solid (99% yield).

**<sup>1</sup>H NMR (400 MHz, CDCl<sub>3</sub>):** δ 1.72-2.06 (m, 11H), 2.58-2.73 (m, 6H), 3.89-3.99 (m, 2H), 5.26 (s, 1H), 6.73 (t, *J* = 1.8 Hz, 1H), 6.80 (d, *J* = 7.8 Hz, 1H), 6.90 (dd, *J* = 8.3 Hz, *J* = 2.1 Hz, 1H), 7.22 (td, *J* = 7.5 Hz, *J* = 0.9 Hz, 1H), 7.24-7.28 (m, 2H), 7.28-7.34 (m, 2H), 7.36-7.43 (m, 3H), 7.50 (ddd, *J* = 8.9 Hz, *J* = 7.6 Hz, *J* = 1.3 Hz, 1H), 8.42 (br. s, 1H).

**<sup>13</sup>C NMR (100.6 MHz, CDCl<sub>3</sub>):** δ 23.4, 24.2, 24.9, 27.1, 54.1, 55.9, 57.6, 67.6, 76.4, 112.9, 115.0, 117.2, 118.4, 118.6, 125.5, 125.6, 125.7, 128.9, 129.6, 130.6, 130.7, 130.7, 138.8, 140.4, 143.0, 159.6, 169.1.

**HRMS (ESI<sup>+</sup>, m/z):** [C<sub>31</sub>H<sub>34</sub>O<sub>2</sub>N<sub>3</sub>]<sup>+</sup> (M+H)<sup>+</sup> calc. 480.2646, found 480.2632.

(2*RS*,3*RS*)-1-Acetyl-3-phenyl-2-(3-((5-(pyrrolidin-1-yl)pentyl)oxy)phenyl)indoline-3-carbonitrile **57**

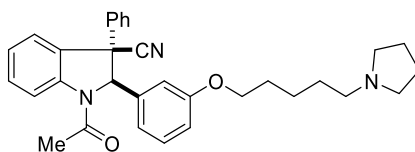

Prepared according to general procedure 5 to afford the title compound as a highly hygroscopic colourless solid (87% yield).

**<sup>1</sup>H NMR (500 MHz, CDCl<sub>3</sub>):** δ 1.43-1.54 (m, 2H), 1.64-1.73 (m, 2H), 1.73-1.82 (m, 6H), 1.83-2.10 (br. s, 3H), 2.60-2.66 (m, 2H), 2.70-2.78 (m, 4H), 3.86-3.95 (m, 2H), 5.26 (s, 1H), 6.72 (t, *J* = 1.7 Hz, 1H), 6.78 (d, *J* = 7.9 Hz, 1H), 6.89 (dd, *J* = 8.4 Hz, *J* = 2.0 Hz, 1H), 7.21 (td, *J* = 7.6 Hz, *J* = 0.9 Hz, 1H), 7.22-7.26 (m, 2H), 7.27-7.33 (m, 2H), 7.34-7.42 (m, 3H), 7.46-7.52 (m, 1H), 8.41 (br. s, 1H).

<sup>13</sup>C NMR (125.75 MHz, CDCl<sub>3</sub>): δ 23.4, 23.9, 24.2, 27.6, 28.9, 54.0, 56.1, 57.7, 67.6, 76.5, 112.9, 115.0, 117.2, 118.4, 118.6, 125.4, 125.5, 125.7, 125.7, 128.9, 130.6, 130.7, 138.8, 140.4, 143.0, 159.6, 169.1.<sup>†</sup>

<sup>†</sup> 1 peak obscured.

HRMS (ESI<sup>+</sup>, m/z): [C<sub>32</sub>H<sub>36</sub>O<sub>2</sub>N<sub>3</sub>]<sup>+</sup> (M+H)<sup>+</sup> calc. 494.2802, found 494.2785.

(2*RS*,3*RS*)-1-Acetyl-3-phenyl-2-(3-((6-(pyrrolidin-1-yl)hexyl)oxy)phenyl)indoline-3-carbonitrile **58**

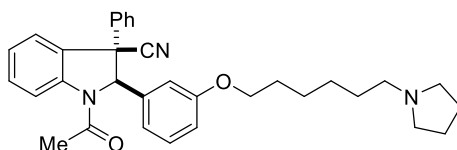

Prepared according to general procedure 5 to afford the title compound as a highly hygroscopic colourless solid (80% yield).

<sup>1</sup>H NMR (400 MHz, CDCl<sub>3</sub>): δ 1.36-1.54 (m, 4H), 1.62-1.72 (m, 2H), 1.73-1.82 (m, 2H), 1.85-2.06 (m, 7H), 2.57-2.64 (m, 2H), 2.65-2.78 (m, 4H), 3.92 (t, *J* = 6.4 Hz, 2H), 5.27 (s, 1H), 6.75 (s, 1H), 6.81 (d, *J* = 7.7 Hz, 1H), 6.92 (dd, *J* = 8.2 Hz, *J* = 1.9 Hz, 1H), 7.21-7.30 (m, 3H), 7.32 (t, *J* = 8.0 Hz, 2H), 7.37-7.45 (m, 3H), 7.51 (td, *J* = 8.4 Hz, *J* = 1.3 Hz, 1H), 8.43 (br. s, 1H).

<sup>13</sup>C NMR (100.6 MHz, CDCl<sub>3</sub>): δ 23.4, 24.2, 25.9, 27.2, 28.1, 29.0, 54.1, 57.6, 56.3, 67.8, 76.4, 112.9, 115.0, 118.3, 118.5, 125.4, 125.6, 125.7, 128.9, 129.6, 130.6, 130.7, 138.8, 140.4, 143.0, 159.7, 169.1.<sup>†</sup>

<sup>†</sup> 2 peaks obscured.

HRMS (ESI<sup>+</sup>, m/z): [C<sub>33</sub>H<sub>38</sub>O<sub>2</sub>N<sub>3</sub>]<sup>+</sup> (M+H)<sup>+</sup> calc. 508.2959, found 508.2945.

(2*RS*,3*RS*)-1-Acetyl-3-phenyl-2-(3-((7-(pyrrolidin-1-yl)heptyl)oxy)phenyl)indoline-3-carbonitrile **59**

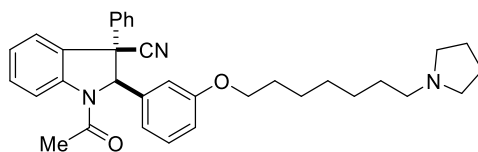

Prepared according to general procedure 5 to afford the title compound as a highly hydroscopic colourless solid (90% yield).

**<sup>1</sup>H NMR (400 MHz, CDCl<sub>3</sub>):** δ 1.32-1.50 (m, 6H), 1.58-1.69 (m, 2H), 1.70-1.79 (m, 2H), 1.84-2.06 (m, 7H), 2.55-2.62 (m, 2H), 2.64-2.79 (m, 4H), 3.85-3.95 (m, 2H), 5.25 (s, 1H), 6.73 (t, *J* = 1.7 Hz, 1H), 6.79 (d, *J* = 7.9 Hz, 1H), 6.91 (dd, *J* = 8.0 Hz, *J* = 2.0 Hz, 1H), 7.22 (td, *J* = 7.5 Hz, *J* = 1.0 Hz, 1H), 7.24-7.27 (m, 2H), 7.28-7.34 (m, 2H), 7.36-7.43 (m, 3H), 7.47-7.53 (m, 1H), 8.41 (br. s, 1H).

**<sup>13</sup>C NMR (100.6 MHz, CDCl<sub>3</sub>):** δ 23.4, 24.2, 25.9, 27.4, 28.0, 29.1, 29.2, 54.1, 56.4, 57.5, 67.9, 76.5, 112.9, 115.0, 117.2, 118.3, 118.5, 125.4, 125.6, 125.8, 128.9, 129.6, 130.6, 130.6, 130.7, 138.8, 140.4, 143.1, 159.7, 169.2.

**HRMS (ESI<sup>+</sup>, *m/z*):** [C<sub>34</sub>H<sub>40</sub>O<sub>2</sub>N<sub>3</sub>]<sup>+</sup> (M+H)<sup>+</sup> calc. 522.3126, found 522.3104.

(2*RS*,3*RS*)-1-Acetyl-3-phenyl-2-(3-((8-(pyrrolidin-1-yl)octyl)oxy)phenyl)indoline-3-carbonitrile **60**

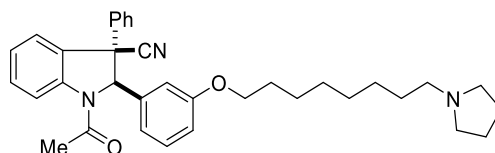

Prepared according to general procedure 5 to afford the title compound as a highly hydroscopic colourless solid (98% yield).

**<sup>1</sup>H NMR (400 MHz, CDCl<sub>3</sub>):** δ 1.29-1.48 (m, 8H), 1.57-1.68 (m, 2H), 1.69-1.78 (m, 2H), 1.83-2.06 (m, 7H), 2.55-2.63 (m, 2H), 2.66-2.78 (m, 4H), 3.85-3.93 (m, 2H), 5.26 (s, 1H), 6.73 (t, *J* = 1.7 Hz, 1H), 6.78 (d, *J* = 8.1 Hz, 1H), 6.90 (dd, *J* = 8.3 Hz, *J* = 2.2 Hz, 1H), 7.21 (td, *J* = 7.5 Hz, *J* = 0.7 Hz, 1H), 7.23-7.34 (m, 4H), 7.35-7.42 (m, 3H), 7.46-7.51 (m, 1H), 8.41 (br. s, 1H).

**<sup>13</sup>C NMR (100.6 MHz, CDCl<sub>3</sub>):** δ 23.4, 24.1, 25.9, 27.4, 28.0, 29.1, 29.2, 29.3, 54.0, 56.4, 57.6, 68.0, 76.5, 112.9, 115.0, 117.2, 118.3, 118.5, 125.4, 125.7, 125.8, 128.9, 129.6, 130.6, 130.6, 130.7, 138.8, 140.4, 143.0, 159.8, 169.2.

**HRMS (ESI<sup>+</sup>, *m/z*):** [C<sub>35</sub>H<sub>42</sub>O<sub>2</sub>N<sub>3</sub>]<sup>+</sup> (M+H)<sup>+</sup> calc. 536.3283, found 536.3258.

(2*RS*,3*RS*)-1-Acetyl-3-phenyl-2-(3-((9-(pyrrolidin-1-yl)nonyl)oxy)phenyl)indoline-3-carbonitrile **62**

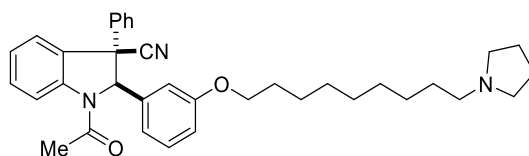

Prepared according to general procedure 5 to afford the title compound as a highly hydroscopic colourless solid (99% yield).

**<sup>1</sup>H NMR (400 MHz, CDCl<sub>3</sub>):** δ = 1.26-1.45 (m, 10H), 1.60-1.79 (m, 4H), 1.86-2.04 (m, 7H), 2.61-2.70 (m, 2H), 2.76-2.88 (m, 4H), 3.84-3.93 (m, 2H), 5.24 (s, 1H), 6.72 (t, *J* = 1.7 Hz, 1H), 6.78 (d, *J* = 7.8 Hz, 1H), 6.90 (dd, *J* = 8.0 Hz, *J* = 1.9 Hz, 1H), 7.21 (td, *J* = 7.6 Hz, *J* = 0.8 Hz, 1H), 7.22-7.26 (m, 2H), 7.27-7.33 (m, 2H), 7.34-7.42 (m, 3H), 7.48 (ddd, *J* = 8.9 Hz, *J* = 7.6 Hz, *J* = 1.3 Hz, 1H), 8.40 (br. s, 1H).

**<sup>13</sup>C NMR (100.6 MHz, CDCl<sub>3</sub>):** δ 23.4, 24.2, 26.0, 27.3, 27.6, 29.1, 29.2, 29.3, 29.4, 53.9, 56.2, 57.6, 68.0, 76.4, 112.9, 115.0, 117.2, 118.2, 118.5, 125.4, 125.5, 125.7, 125.7, 128.9, 129.6, 130.6, 130.7, 138.8, 140.4, 143.0, 159.8, 169.1.

**HRMS (ESI<sup>+</sup>, *m/z*):** [C<sub>36</sub>H<sub>44</sub>O<sub>2</sub>N<sub>3</sub>]<sup>+</sup> (*M*+*H*)<sup>+</sup> calc. 550.3428, found 550.3411.

(2*RS*,3*RS*)-1-Benzoyl-3-phenyl-2-(3-((7-(pyrrolidin-1-yl)heptyl)oxy)phenyl)indoline-3-carbonitrile **63**

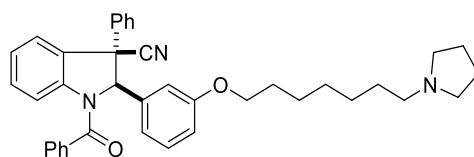

Prepared according to general procedure 5 to afford the title compound as a highly hydroscopic colourless solid (99% yield).

**<sup>1</sup>H NMR (500 MHz, CDCl<sub>3</sub>):** δ 1.34-1.49 (m, 6H), 1.69-1.78 (m, 4H), 1.93-2.04 (m, 4H), 2.67-2.77 (m, 2H), 2.78-3.00 (m, 4H), 3.82-3.91 (m, 2H), 5.36 (s, 1H), 6.57 (br. s, 1H), 6.64 (d, *J* = 6.8 Hz, 1H), 6.87 (dd, *J* = 8.4 Hz, *J* = 2.2 Hz, 1H), 7.08-7.51 (m, 15H).

<sup>13</sup>C NMR (125.75 MHz, CDCl<sub>3</sub>): δ 23.4, 25.8, 27.2, 27.2, 29.0, 29.0, 53.9, 56.1, 57.0, 67.8, 77.2, 112.8, 115.2, 117.2, 118.5, 118.7, 125.7, 125.7, 126.0, 126.9, 128.5, 128.9, 129.5, 129.9, 130.1, 130.4, 130.7, 135.6, 138.9, 139.6, 143.0, 159.3, 169.5.

HRMS (ESI<sup>+</sup>, m/z): [C<sub>39</sub>H<sub>42</sub>N<sub>3</sub>O<sub>2</sub>]<sup>+</sup> (M+H)<sup>+</sup> calc. 584.3272, found 584.3274.

(2*RS*,3*RS*)-1-(Furan-2-carbonyl)-3-phenyl-2-(3-((7-(pyrrolidin-1-yl)heptyl)oxy)phenyl)indoline-3-carbonitrile **64**

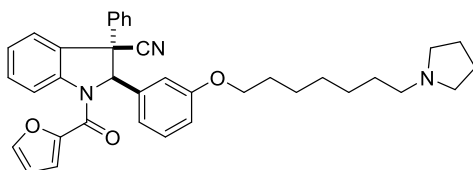

Prepared according to general procedure 5 to afford the title compound as a highly hygroscopic colourless solid (99% yield).

<sup>1</sup>H NMR (500 MHz, CDCl<sub>3</sub>): δ 1.28-1.47 (m, 6H), 1.62-1.76 (m, 4H), 1.84-1.95 (m, 4H), 2.57-2.67 (m, 2H), 2.69-2.85 (m, 4H), 3.81-3.92 (m, 2H), 6.03 (s, 1H), 6.35-6.38 (m, 1H), 6.73 (s, 1H), 6.80 (d, *J* = 7.8 Hz, 1H), 6.83 (d, *J* = 8.2 Hz, 1H), 6.99 (d, *J* = 2.9 Hz, 1H), 7.20-7.29 (m, 2H), 7.30-7.43 (m, 7H), 7.52 (t, *J* = 7.8 Hz, 1H), 8.35 (br. s, 1H).

<sup>13</sup>C NMR (125.75 MHz, CDCl<sub>3</sub>): δ 23.8, 26.3, 27.7, 28.2, 29.5, 29.5, 54.4, 56.7, 58.5, 68.3, 76.2, 112.3, 113.1, 115.3, 118.4, 118.8, 119.0, 126.1, 126.2, 126.4, 129.3, 129.7, 130.0, 130.5, 131.0, 139.9, 140.5, 143.9, 145.1, 147.5, 158.2, 159.8.<sup>†</sup>

<sup>†</sup> 1 peak obscured.

HRMS (ESI<sup>+</sup>, m/z): [C<sub>37</sub>H<sub>40</sub>O<sub>3</sub>N<sub>3</sub>]<sup>+</sup> (M+H)<sup>+</sup> calc. 574.3064, found 574.3050.



(2*RS*,3*RS*)-1-(3-Methylbutanoyl)-3-phenyl-2-(3-((7-(pyrrolidin-1-yl)heptyl)oxy)phenyl)indoline-3-carbonitrile **65**

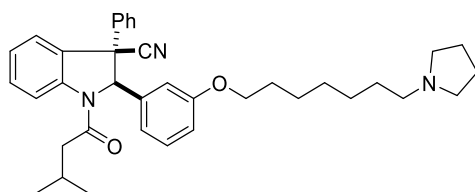

Prepared according to general procedure 5 to afford the title compound as a highly hygroscopic colourless solid (99% yield).

**<sup>1</sup>H NMR (500 MHz, CDCl<sub>3</sub>):** δ 0.67-0.86 (m, 6H), 1.34-1.51 (m, 6H), 1.63-1.82 (m, 4H), 1.87-2.21 (m, 7H), 2.61-2.70 (m, 2H), 2.71-2.89 (m, 4H), 3.88-3.95 (m, 2H), 5.32 (s, 1H), 6.75 (t, *J* = 1.7 Hz, 1H), 6.80 (d, *J* = 7.6 Hz, 1H), 6.92 (dd, *J* = 8.3 Hz, *J* = 2.1 Hz, 1H), 7.24 (td, *J* = 7.6 Hz, *J* = 0.9 Hz, 1H), 7.26-7.29 (m, 2H), 7.29-7.37 (m, 2H), 7.37-7.44 (m, 3H), 7.52 (ddd, *J* = 8.8 Hz, *J* = 7.4 Hz, *J* = 1.3 Hz, 1H), 8.47 (br. s, 1H).

**<sup>13</sup>C NMR (125.75 MHz, CDCl<sub>3</sub>):** δ 22.2, 22.4, 23.4, 23.4, 25.3, 25.9, 27.3, 27.7, 29.0, 29.1, 44.3, 54.0, 56.2, 67.9, 75.8, 112.9, 115.1, 117.4, 118.4, 118.6, 125.4, 125.5, 125.7, 128.1, 128.9, 129.5, 130.5, 139.0, 140.3, 143.2, 159.7, 171.3.

**HRMS (ESI<sup>+</sup>, *m/z*):** [C<sub>37</sub>H<sub>46</sub>N<sub>3</sub>O<sub>2</sub>]<sup>+</sup> (*M*+*H*)<sup>+</sup> calc. 564.3585, found 564.3591.

(2*RS*,3*RS*)-3-Phenyl-2-(3-((7-(pyrrolidin-1-yl)heptyl)oxy)phenyl)-1-(4-(trifluoromethyl)benzoyl)indoline-3-carbonitrile **66**

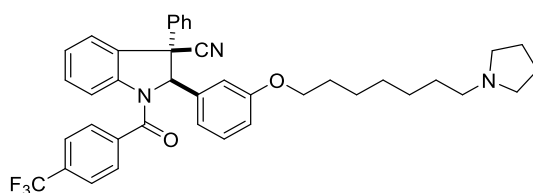

Prepared according to general procedure 5 to afford the title compound as a highly hygroscopic colourless solid (78% yield).

**<sup>1</sup>H NMR (500 MHz, CDCl<sub>3</sub>):** δ 1.32-1.50 (m, 6H), 1.63-1.78 (m, 4H), 1.87-1.99 (m, 4H), 2.60-2.69 (m, 2H), 2.69-2.88 (m, 4H), 3.77-3.91 (m, 2H), 5.21 (br. s, 1H), 6.47 (br. s, 1H), 6.61 (d, *J* = 5.9 Hz, 1H), 6.88 (dd, *J* = 8.3 Hz, *J* = 2.4 Hz, 1H), 7.12-7.35 (m, 7H), 7.37-7.63 (m, 7H).

<sup>13</sup>C NMR (125.75 MHz, CDCl<sub>3</sub>): δ 23.4, 25.8, 27.3, 27.8, 29.0, 29.1, 54.0, 56.3, 57.1, 67.9, 77.3, 112.9, 115.3, 117.5, 118.4, 123.5 (q, *J* = 273.1 Hz), 125.5, 125.6, 126.1, 126.3, 127.2, 128.3 (q, *J* = 18.4 Hz), 129.1, 129.6, 129.9, 130.3, 130.7, 132.3 (q, *J* = 33.6 Hz), 138.6, 139.0, 139.6, 142.6, 159.5, 168.2.

HRMS (ESI<sup>+</sup>, *m/z*): [C<sub>40</sub>H<sub>41</sub>O<sub>2</sub>N<sub>3</sub>F<sub>3</sub>]<sup>+</sup> (M+H)<sup>+</sup> calc. 652.3156, found 652.3128.

Ethyl (2*RS*,3*RS*)-3-cyano-3-phenyl-2-(3-((7-(pyrrolidin-1-yl)heptyl)oxy)phenyl)indoline-1-carboxylate **67**

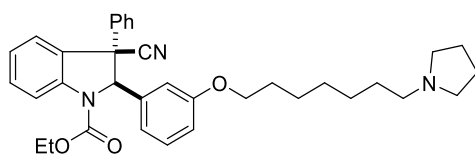

Prepared according to general procedure 5 to afford the title compound as a highly hydroscopic colourless solid (86% yield).

<sup>1</sup>H NMR (700 MHz, CDCl<sub>3</sub>): δ 1.10 (br. s, 3H), 1.35-1.41 (m, 4H), 1.43-1.49 (m, 2H), 1.62-1.70 (m, 2H), 1.73-1.79 (m, 2H), 1.87-1.95 (m, 4H), 2.61 (t, *J* = 7.5 Hz, 2H), 2.66-2.82 (m, 4H), 3.92 (t, *J* = 6.4 Hz, 2H), 4.04-4.23 (m, 2H), 5.38 (s, 1H), 6.75 (s, 1H), 6.80 (d, *J* = 7.6 Hz, 1H), 6.89 (dd, *J* = 8.0 Hz, *J* = 2.2 Hz, 1H), 7.18 (t, *J* = 7.6 Hz, 1H), 7.27-7.30 (m, 3H), 7.32 (d, *J* = 7.7 Hz, 1H), 7.36-7.39 (m, 1H), 7.39-7.43 (m, 2H), 7.49 (t, *J* = 8.0 Hz, 1H), 8.03 (br. s, 1H).

<sup>13</sup>C NMR (176.05 MHz, CDCl<sub>3</sub>): δ 14.2, 23.4, 25.9, 27.4, 27.9, 29.1, 29.2, 54.0, 56.3, 56.8, 62.1, 67.9, 75.3, 112.8, 114.7, 115.2, 118.2, 118.8, 124.4, 125.8, 125.9, 128.7, 128.7, 129.4, 130.0, 130.7, 139.6, 140.6, 142.4, 152.5, 159.4.

HRMS (ESI<sup>+</sup>, *m/z*): [C<sub>35</sub>H<sub>42</sub>N<sub>3</sub>O<sub>3</sub>]<sup>+</sup> (M+H)<sup>+</sup> calc. 552.3221, found 552.3223.

(2*RS*,3*RS*)-1-Acetyl-2-(3-((7-(diethylamino)heptyl)oxy)phenyl)-3-phenylindoline-3-carbonitrile **18**

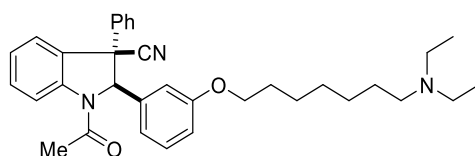

To a solution of *syn*-1-acetyl-2-(3-((7-bromoheptyl)oxy)phenyl)-3-phenylindoline-3-carbonitrile **47** (300 mg) in MeCN (5 mL) was added K<sub>2</sub>CO<sub>3</sub> (5.0 eq.) and diethylamine (4.0 eq.). The reaction was heated to 60 °C overnight before diluting with EtOAc and washing with water and brine. The organic phase was dried over MgSO<sub>4</sub> and evaporated under reduced pressure. Purification by column chromatography (SiO<sub>2</sub>, DCM/MeOH/Et<sub>3</sub>N 95:5:0.5) afforded the title compound as a highly hygroscopic colourless solid (75% yield).

<sup>1</sup>H NMR (400 MHz, CDCl<sub>3</sub>): δ 1.23 (t, *J* = 7.2 Hz, 6H), 1.31-1.52 (m, 6H), 1.60-1.71 (m, 2H), 1.71-1.81 (m, 2H), 1.97 (br. s, 3H), 2.66-2.73 (m, 2H), 2.83 (q, *J* = 7.2 Hz, 4H), 3.87-3.96 (m, 2H), 5.27 (br. s, 1H), 6.75 (t, *J* = 1.7 Hz, 1H), 6.81 (d, *J* = 7.7 Hz, 1H), 6.92 (dd, *J* = 8.2 Hz, *J* = 2.1 Hz, 1H), 7.24 (dd, *J* = 7.6 Hz, *J* = 0.9 Hz, 1H), 7.25-7.28 (m, 2H), 7.30-7.36 (m, 2H), 7.37-7.45 (m, 3H), 7.49-7.55 (m, 1H), 8.43 (br. s, 1H).

<sup>13</sup>C NMR (100.6 MHz, CDCl<sub>3</sub>): δ 10.1, 24.2, 25.0, 25.9, 27.2, 29.0, 29.1, 46.0, 46.6, 52.0, 67.9, 76.4, 112.9, 115.0, 117.3, 118.3, 118.5, 125.4, 125.5, 125.7, 128.9, 129.6, 130.6, 130.6, 130.7, 138.8, 140.4, 143.2, 159.7.<sup>†</sup>

<sup>†</sup> 1 peak obscured.

HRMS (ESI<sup>+</sup>, *m/z*): [C<sub>34</sub>H<sub>42</sub>O<sub>2</sub>N<sub>3</sub>]<sup>+</sup> (M+H)<sup>+</sup> calc. 524.3272, found 524.3257.

(2*RS*,3*RS*)-1-Acetyl-3-phenyl-2-(3-((7-(piperidin-1-yl)heptyl)oxy)phenyl)indoline-3-carbonitrile **69**

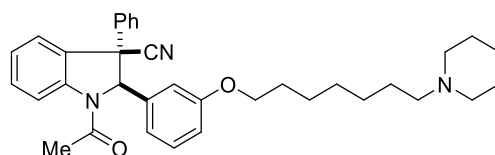

To a solution of *syn*-1-acetyl-2-(3-((7-bromoheptyl)oxy)phenyl)-3-phenylindoline-3-carbonitrile **47** (300 mg) in MeCN (5 mL) was added K<sub>2</sub>CO<sub>3</sub> (5.0 eq.) and piperidine (4.0 eq.). The reaction was heated to 60 °C overnight before diluting with EtOAc and washing with water and brine. The organic phase was dried over MgSO<sub>4</sub> and evaporated under reduced pressure. Purification by column chromatography (SiO<sub>2</sub>, DCM/MeOH/Et<sub>3</sub>N 95:5:0.5) afforded the title compound as a highly hygroscopic colourless solid (65% yield).

<sup>1</sup>H NMR (500 MHz, CDCl<sub>3</sub>): δ 1.29-1.56 (m, 9H), 1.59-1.68 (m, 2H), 1.69-1.80 (m, 6H), 1.98 (br. s, 3H, Ac), 2.43-2.50 (m, 2H), 2.50-2.67 (m, 3H), 3.92 (td, *J* = 6.5 Hz, *J* = 1.8 Hz, 2H), 5.27 (br. s, 1H), 6.75 (br. s, 1H), 6.81 (d, *J* = 7.8 Hz, 1H), 6.92 (dd, *J* = 8.3 Hz, *J* = 2.1 Hz, 1H), 7.24 (td, *J* = 7.6 Hz, *J* = 1.0 Hz, 1H), 7.26-7.29 (m, 2H), 7.30-7.36 (m, 2H), 7.37-7.44 (m, 3H), 7.51 (ddd, *J* = 8.1 Hz, *J* = 7.6 Hz, *J* = 1.3 Hz, 1H), 8.43 (br. s, 1H).

<sup>13</sup>C NMR (125.75 MHz, CDCl<sub>3</sub>): δ 23.9, 24.2, 25.0, 25.9, 25.9, 27.4, 29.1, 29.2, 54.2, 57.6, 59.0, 67.9, 76.5, 112.9, 115.0, 117.3, 118.3, 118.5, 125.5, 125.6, 125.7, 128.7, 128.9, 129.6, 130.6, 130.7, 138.8, 140.4, 143.0, 159.7, 169.1.

HRMS (ESI<sup>+</sup>, m/z): [C<sub>35</sub>H<sub>42</sub>O<sub>2</sub>N<sub>3</sub>]<sup>+</sup> (M+H)<sup>+</sup> calc. 536.3272, found 536.3258.

(2*RS*,3*RS*)-1-Acetyl-2-(3-((7-morpholinoheptyl)oxy)phenyl)-3-phenylindoline-3-carbonitrile **70**

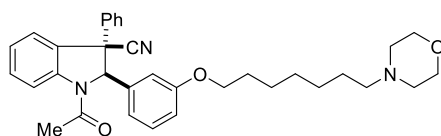

To a solution of *syn*-1-acetyl-2-(3-((7-bromoheptyl)oxy)phenyl)-3-phenylindoline-3-carbonitrile **47** (300 mg) in MeCN (5 mL) was added K<sub>2</sub>CO<sub>3</sub> (5.0 eq.) and morpholine (4.0 eq.). The reaction was heated to 60 °C overnight before diluting with EtOAc and washing with water and brine. The organic phase was dried over MgSO<sub>4</sub> and evaporated under reduced pressure. Purification by column chromatography (SiO<sub>2</sub>, DCM/MeOH/Et<sub>3</sub>N 95:5:0.5) afforded the title compound as a highly hygroscopic colourless solid (88% yield).

<sup>1</sup>H NMR (400 MHz, CDCl<sub>3</sub>): δ 1.33-1.59 (m, 8H), 1.73-1.82 (m, 2H), 1.98 (br. s, 3H), 2.32-2.39 (m, 2H), 2.42-2.52 (m, 4H), 3.75 (t, *J* = 4.6 Hz, 4H), 3.88-3.97 (m, 2H), 5.28 (br. s, 1H), 6.75 (t, *J* = 1.9 Hz, 1H), 6.82 (d, *J* = 7.7 Hz, 1H), 6.93 (dd, *J* = 8.2 Hz, *J* = 2.1 Hz, 1H), 7.25 (td, *J* = 7.5 Hz, *J* = 1.0 Hz, 1H), 7.26-7.28 (m, 2H), 7.31-7.37 (m, 2H), 7.38-7.45 (m, 3H), 7.52 (ddd, *J* = 8.8 Hz, *J* = 7.5 Hz, *J* = 1.3 Hz, 1H), 8.44 (br. s, 1H).

<sup>13</sup>C NMR (100.6 MHz, CDCl<sub>3</sub>): δ 24.2, 26.0, 26.5, 27.4, 29.1, 29.3, 53.8, 56.1, 59.2, 67.0, 68.0, 76.5, 112.9, 115.0, 117.2, 118.3, 118.5, 125.5, 125.6, 125.8, 128.9, 129.6, 130.6, 130.6, 130.7, 138.8, 140.4, 143.1, 159.8.<sup>†</sup>

<sup>†</sup> 1 peak obscured.

HRMS (ESI<sup>+</sup>, m/z): [C<sub>34</sub>H<sub>40</sub>O<sub>3</sub>N<sub>3</sub>]<sup>+</sup> (M+H)<sup>+</sup> calc. 538.3064, found 538.3044.

2-(3-Nitropyridin-2-yl)-2-phenylacetonitrile **72**

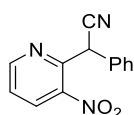

Nitrile **72** was prepared according to a modified literature procedure.<sup>19</sup> Benzyl cyanide (1.20 mL, 10.4 mmol) was added to a suspension of tris[2-(2-methoxyethoxy)ethyl]amine (3.0 mL, 9.4 mmol) and KOH (2.33 g, 41.6 mmol) in THF (25 mL). The mixture was stirred at 50 °C for 10 min, and a solution of 2-chloro-3-nitropyridine (1.48 g, 9.36 mmol) in THF (15 mL) was added over 1 h by syringe pump. The mixture was stirred at 50 °C for a further 30 min, then allowed to cool to rt and quenched with NH<sub>4</sub>Cl (saturated aq., 50 mL). The mixture was extracted with EtOAc, and the combined organic extracts were washed with pH 6 phosphate buffer, then brine, dried over MgSO<sub>4</sub>, filtered, and concentrated. Purification by flash pressure column chromatography (22% EtOAc/petroleum ether) afforded nitrile **72** as a yellow solid (1.02 g, 4.26 mmol, 46%).

<sup>1</sup>H NMR (400 MHz, CDCl<sub>3</sub>): δ 8.89 (1H, dd, *J* = 4.6 Hz, 1.5 Hz), 8.32 (1H, dd, *J* = 8.3 Hz, 1.7 Hz), 7.48 (1H, dd, *J* = 8.3 Hz, 4.6 Hz), 7.38-7.44 (2H, m), 7.24-7.32 (3H, m), 6.25 (1H, s).

<sup>13</sup>C NMR(100.6 MHz, CDCl<sub>3</sub>): δ 153.7, 149.5, 143.9, 133.8, 133.2, 129.2, 128.9, 128.3, 124.2, 118.0, 42.0.

HRMS (ES<sup>+</sup>): [C<sub>13</sub>H<sub>9</sub>O<sub>2</sub>N<sub>3</sub>Na]<sup>+</sup> ([M+Na]<sup>+</sup>) requires 262.0587; found 262.0588.

MP: 96-98 °C.

Ethyl 2-cyano-2-(nitrophenyl)acetate **73**

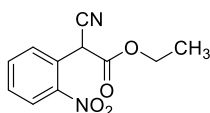

Ethyl cyanoacetate (4.3 mL, 40 mmol) was added dropwise to a suspension of KO<sup>t</sup>Bu (4.9 g, 44 mmol) in THF (50 mL) and stirred at 0 °C for 10 min. 1-Fluoro-2-nitrobenzene (2.1 mL, 20 mmol) was added dropwise and stirred at 60 °C for 16 h. The mixture was diluted with EtOAc, and HCl (aq., 1 M, 30 mL) was added. The solution with extracted with EtOAc. The combined organic extracts were washed with brine, dried over MgSO<sub>4</sub>, filtered, and concentrated. Purification by flash pressure column chromatography (45% Et<sub>2</sub>O/hexane) afforded nitrile **73** as a yellow oil (1.9 g, 8.0 mmol, 40%).

<sup>1</sup>H NMR (400 MHz, CDCl<sub>3</sub>): δ 8.23 (1H, d, *J* = 7.8 Hz), 7.74-7.81 (2H, m), 7.65 (1H, m), 5.66 (1H, s), 4.30 (2H, q, *J* = 7.1 Hz), 1.32 (3H, t, *J* = 7.1 Hz).

<sup>13</sup>C (100.6 MHz, CDCl<sub>3</sub>): δ 163.5, 147.3, 134.5, 131.5, 130.6, 126.0, 125.2, 114.4, 63.8, 41.2, 13.8.

**HRMS (ES<sup>+</sup>):** C<sub>11</sub>H<sub>10</sub>NaN<sub>2</sub>O<sub>4</sub><sup>+</sup> ([M+Na]<sup>+</sup>) requires 257.0538; found 257.0541.

Methyl 2-(nitrophenyl)-2-phenylacetate **74**

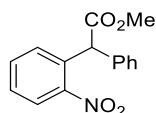

A solution of methyl phenylacetate (0.56 mL, 4.0 mmol) in THF (20 mL) was added to a solution of KHMDS (0.5 M in toluene, 16.8 mL, 8.40 mmol) in THF (20 mL) and stirred at -78 °C for 10 min. 1-Fluoro-2-nitrobenzene (0.42 mL, 4.0 mmol) was added dropwise, and the mixture was stirred at -60 °C for 30 min. The solution was allowed to warm to 0 °C, and H<sub>2</sub>O (10 mL) was added. The mixture was extracted with EtOAc. Purification by flash pressure column chromatography (10% Et<sub>2</sub>O/petroleum ether) afforded ester **74** as a pale yellow oil (335 mg, 1.24 mmol, 31%).

**<sup>1</sup>H NMR (400 MHz, CDCl<sub>3</sub>):** δ 7.56 (1H, dd, *J* = 7.9 Hz, 1.3 Hz), 6.95-7.14 (6H, m), 6.72 (1H, dt, *J* = 7.9 Hz, 1.3 Hz), 6.58 (1H, dt, *J* = 7.9 Hz, 1.2 Hz), 5.75 (1H, app. s), 3.31 (3H, s).

**<sup>13</sup>C (100.6 MHz, CDCl<sub>3</sub>):** δ 172.1, 149.9, 137.5, 134.6, 133.0, 132.0, 130.0, 129.6, 128.3, 128.2, 125.2, 54.0, 52.4.

**HRMS (ES<sup>+</sup>):** C<sub>15</sub>H<sub>13</sub>NaNO<sub>4</sub><sup>+</sup> ([M+Na]<sup>+</sup>) requires 294.0742; found 294.0745.

2-(2-Nitrophenyl)-2-(thiazol-2-yl)acetonitrile **75**

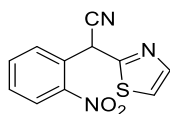

Thiazole **75** was prepared according to a modified literature procedure.<sup>9</sup> A solution of 2-nitrophenylacetonitrile (800 mg, 4.93 mmol) in DMSO (8 mL) was added dropwise to a suspension of 2-chlorothiazole (0.42 mL, 4.9 mmol) and Cs<sub>2</sub>CO<sub>3</sub> (3.54 g, 10.9 mmol) in DMSO (8 mL) and stirred at 80 °C for 16 h. The mixture was allowed to cool to rt, and NH<sub>4</sub>Cl (saturated aq.) was added. The mixture was extracted with CH<sub>2</sub>Cl<sub>2</sub>. The combined organic extracts were washed three times with H<sub>2</sub>O, then brine, dried over Na<sub>2</sub>SO<sub>4</sub>, filtered, and concentrated. Purification by flash pressure column chromatography (20% EtOAc/petroleum ether) afforded nitrile **75** as an orange solid (344 mg, 1.40 mmol, 28%).

**<sup>1</sup>H NMR (400 MHz, CDCl<sub>3</sub>):** δ 8.18 (1H, dd, *J* = 7.8 Hz, 1.2 Hz), 7.97 (1H, dd, *J* = 7.8 Hz, 1.3 Hz), 7.74-7.83 (2H, m), 7.63 (1H, td, *J* = 7.8 Hz, 1.3 Hz), 7.39 (1H, d, *J* = 3.4 Hz), 6.61 (1H, s).

**<sup>13</sup>C NMR (100.6 MHz, CDCl<sub>3</sub>):** δ 161.3, 147.1, 143.6, 134.6, 131.2, 130.5, 128.2, 125.9, 121.2, 116.7, 37.2.

**HRMS (ES<sup>+</sup>):** [C<sub>11</sub>H<sub>7</sub>O<sub>2</sub>Na<sup>32</sup>S]<sup>+</sup> ([M+Na]<sup>+</sup>) requires 268.0151; found 268.0151.

**MP:** 40-41 °C.

(*E*)-((5'-Bromopyridin-3'-yl)methylene)amino)phenyl-2-phenylacetonitrile **76**

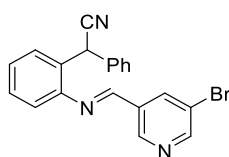

5-Bromo-3-pyridinecarboxaldehyde (800 mg, 4.30 mmol) was added to a suspension of aniline **20** (597 mg, 2.87 mmol) and MgSO<sub>4</sub> (1.73 g, 14.3 mmol) in dry toluene (25 mL). The mixture was stirred at rt for 2 h, then filtered and concentrated. The crude product was triturated with ice-cooled Et<sub>2</sub>O to afford imine **76** as a yellow solid (1.02 g, 2.71 mmol, 94%).

**<sup>1</sup>H NMR (400 MHz, CDCl<sub>3</sub>):** δ 8.85 (1H, d, *J* = 1.7 Hz), 8.74 (1H, d, *J* = 2.2 Hz), 8.33-8.39 (2H, m), 7.45 (1H, dd, *J* = 7.6 Hz, 1.5 Hz), 7.35 (1H, td, *J* = 7.7 Hz, 1.5 Hz), 7.19-7.33 (6H, m, *Ph*), 7.05 (1H, dd, *J* = 7.7 Hz, 1.2 Hz), 5.83 (1H, s).

**<sup>13</sup>C NMR (100.6 MHz, CDCl<sub>3</sub>):** δ 156.1, 153.4, 148.9, 147.8, 137.2, 135.8, 132.9, 131.2, 129.7, 129.0, 128.9, 128.0, 127.9, 127.7, 121.4, 119.8, 117.8, 37.7.

**HRMS (ES<sup>+</sup>):** C<sub>20</sub>H<sub>14</sub><sup>79</sup>BrN<sub>3</sub>Na<sup>+</sup> ([M+Na]<sup>+</sup>) requires 398.0263; found 398.0265. C<sub>20</sub>H<sub>14</sub><sup>81</sup>BrN<sub>3</sub>Na<sup>+</sup> ([M+Na]<sup>+</sup>) requires 400.0244; found 400.0244.

**MP:** 115-118 °C.

(*E*)-2-(2-((3-Bromobenzylidene)amino)phenyl)-2-phenylacetonitrile **77**

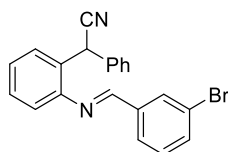

3-Bromobenzaldehyde (0.25 mL, 2.1 mmol) was added to a suspension of aniline **20** (370 mg, 1.78 mmol) and MgSO<sub>4</sub> (1.07 g, 8.89 mmol) in dry toluene (12 mL). The mixture was stirred at rt for 16 h, then filtered and concentrated. Purification by flash pressure column chromatography (8-15% Et<sub>2</sub>O/petroleum ether) afforded imine **77** as a yellow solid (497 mg, 1.32 mmol, 74%).

<sup>1</sup>H NMR (400 MHz, C<sub>6</sub>D<sub>6</sub>): δ 7.78 (1H, t, *J* = 1.4 Hz), 7.55 (1H, s), 7.48 (1H, dd, *J* = 7.6 Hz, 1.4 Hz), 7.41 (1H, dt, *J* = 7.8 Hz, 1.4 Hz), 7.21-7.27 (3H, m), 6.85-7.01 (5H, m), 6.74 (1H, t, *J* = 7.8 Hz), 6.53 (1H, dd, *J* = 7.6 Hz, 1.4 Hz), 5.66 (1H, s).

<sup>13</sup>C NMR (100.6 MHz, C<sub>6</sub>D<sub>6</sub>): δ 159.3, 149.0, 138.6, 137.2, 134.9, 132.6, 132.2, 130.8, 129.8, 129.4, 129.2, 128.5, 128.1, 127.8, 127.8, 123.6, 120.4, 118.5, 38.5.

HRMS (ES<sup>+</sup>): C<sub>21</sub>H<sub>16</sub><sup>79</sup>BrN<sub>2</sub><sup>+</sup> ([M+H]<sup>+</sup>) requires 375.0491; found 375.0488. C<sub>21</sub>H<sub>16</sub><sup>81</sup>BrN<sub>2</sub><sup>+</sup> ([M+H]<sup>+</sup>) requires 377.0471; found 377.0467.

MP: 123-126 °C.

(*E*)-2-(2-(((5-Bromofuran-2-yl)methylene)amino)phenyl)-2-phenylacetone nitrile **78**

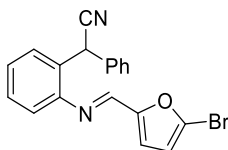

5-Bromo-2-furaldehyde (333 mg, 1.90 mmol) was added to a suspension of aniline **20** (330 mg, 1.58 mmol) and MgSO<sub>4</sub> (954 mg, 7.92 mmol) in CH<sub>2</sub>Cl<sub>2</sub> (12 mL). The mixture was stirred at rt for 16 h, then filtered and concentrated. Purification by flash pressure column chromatography (20% Et<sub>2</sub>O/petroleum ether) afforded imine **78** as a yellow oil (398 mg, 1.09 mmol, 69%).

<sup>1</sup>H NMR (400 MHz, C<sub>6</sub>D<sub>6</sub>): δ 7.41-7.48 (2H, m), 7.29-7.35 (2H, m), 6.86-6.99 (5H, m), 6.47 (1H, dd, *J* = 7.3 Hz, 1.9 Hz), 6.28 (1H, d, *J* = 3.4 Hz), 5.84-5.91 (2H, m).

<sup>13</sup>C NMR (100.6 MHz, C<sub>6</sub>D<sub>6</sub>): δ 154.9, 148.7, 147.1, 137.4, 132.7, 129.7, 129.4, 129.2, 128.6, 127.8, 127.4, 120.6,



118.0, 117.8, 114.7, 38.1.<sup>†</sup>

† 1 peak obscured.

**HRMS (ES<sup>+</sup>):** C<sub>19</sub>H<sub>13</sub><sup>79</sup>BrNaN<sub>2</sub>O<sup>+</sup> ([M+Na]<sup>+</sup>) requires 387.0104; found 387.0096. C<sub>19</sub>H<sub>13</sub><sup>81</sup>BrNaN<sub>2</sub>O<sup>+</sup> ([M+Na]<sup>+</sup>) requires 389.0083; found 389.0074.

(*E*)-2-(2-(((4-Bromofuran-2-yl)methylene)amino)phenyl)-2-phenylacetonitrile **79**

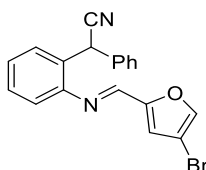

Imine **79** was prepared according to a modified literature procedure.<sup>10</sup> Pyrrolidine (14  $\mu$ L, 0.17 mmol) was added to a stirred slurry of aniline **20** (350 mg, 1.68 mmol), 4-bromo-2-furaldehyde (382 mg, 2.18 mmol), and 3 Å molecular sieves (1.7 g) in CH<sub>2</sub>Cl<sub>2</sub> (10 mL). The mixture was stirred at 50 °C for 18 h, then filtered through Celite<sup>TM</sup>, eluted with CH<sub>2</sub>Cl<sub>2</sub>, and concentrated. Purification by flash pressure column chromatography (10-45% Et<sub>2</sub>O/petroleum ether) afforded imine **79** as an orange oil (359 mg, 0.98 mmol, 59%).

**<sup>1</sup>H NMR (400 MHz, C<sub>6</sub>D<sub>6</sub>):**  $\delta$  7.41-7.47 (2H, m), 7.29-7.34 (2H, m), 6.86-6.98 (6H, m), 6.54 (1H, s), 6.43 (1H, m), 5.89 (1H, s).

**<sup>13</sup>C NMR (100.6 MHz, C<sub>6</sub>D<sub>6</sub>):**  $\delta$  153.6, 148.4, 147.5, 144.3, 137.3, 132.8, 129.7, 129.4, 129.2, 128.5, 128.0, 120.5, 118.0, 117.8, 102.7, 38.0.<sup>†</sup>

† 1 peak obscured.

**HRMS (ES<sup>+</sup>):** C<sub>19</sub>H<sub>13</sub><sup>79</sup>BrNaN<sub>2</sub>O<sup>+</sup> ([M+Na]<sup>+</sup>) requires 387.0104; found 387.0095. C<sub>19</sub>H<sub>13</sub><sup>81</sup>BrNaN<sub>2</sub>O<sup>+</sup> ([M+Na]<sup>+</sup>) requires 389.0083; found 389.0074.

(*E*)-2-(2-(((5-Bromopyridin-3-yl)methylene)amino)phenyl)-2-phenylacetonitrile **80**

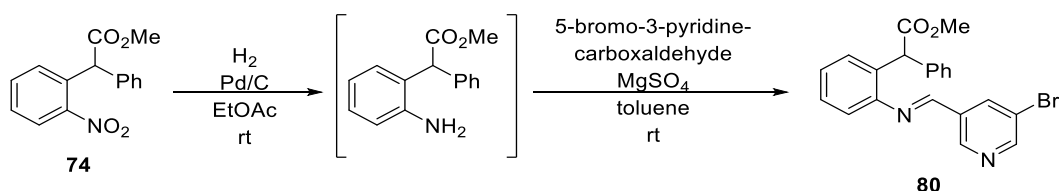

Pd/C (wet degussa type, 16 mg) was added to a solution of ester **74** (160 mg, 0.59 mmol) in EtOAc (6 mL). The suspension was degassed 3 times with hydrogen using a pump-flood procedure and placed under hydrogen for 2.5 h. The mixture was filtered through Celite™, eluted with EtOAc, and concentrated at 26 °C. The resulting residue was dissolved in toluene (6 mL), and MgSO<sub>4</sub> (355 mg, 2.95 mmol) and 5-Bromo-3-pyridinecarboxaldehyde (121 mg, 0.65 mmol) were added. The mixture was stirred at rt for 16 h, then filtered and concentrated. Purification by flash pressure column chromatography (17% EtOAc/petroleum ether) afforded imine **80** as a yellow oil (220 mg, 0.54 mmol, 91%).

<sup>1</sup>H NMR (400 MHz, C<sub>6</sub>D<sub>6</sub>): δ 8.63 (1H, d, *J* = 2.0 Hz), 8.59 (1H, d, *J* = 2.0 Hz), 8.12 (1H, t, *J* = 2.0 Hz), 7.59 (1H, s), 7.34-7.44 (3H, m), 6.98-7.14 (5H, m), 6.67 (1H, dd, *J* = 7.6 Hz, 1.5 Hz), 5.74 (1H, s), 3.32 (3H, s).

<sup>13</sup>C NMR (100.6 MHz, C<sub>6</sub>D<sub>6</sub>): δ 173.3, 155.6, 153.5, 149.5, 149.4, 138.7, 137.4, 135.6, 133.9, 130.0, 129.8, 129.3, 128.6, 127.9, 127.8, 121.9, 117.7, 53.6, 52.1.

HRMS (ES<sup>+</sup>): C<sub>21</sub>H<sub>17</sub><sup>79</sup>BrNaN<sub>2</sub>O<sub>2</sub><sup>+</sup> ([M+Na]<sup>+</sup>) requires 431.0371; found 431.0364.

(E)-2-(2-(((5-(benzyloxy)pyridin-3-yl)methylene)amino)phenyl)-2-phenylacetonitrile **13**

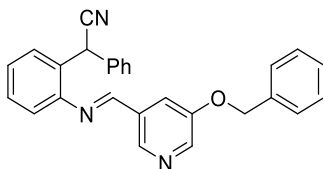

A solution of 5-(benzyloxy)nicotinaldehyde (4.86 g, 22.8 mmol) in toluene (25 mL) was added to a slurry of aniline **20** (4 g, 19 mmol) and MgSO<sub>4</sub> (11.4 g, 95 mmol) in toluene (75 mL). The mixture was stirred at rt for 16 h, filtered, and concentrated. Purification by flash pressure column chromatography (30% EtOAc/petroleum ether) afforded imine **13** as a pale yellow solid (6.05 g, 15 mmol, 79%).

<sup>1</sup>H NMR (500 MHz, C<sub>6</sub>D<sub>6</sub>): δ 8.59 (1H, d, *J* = 2.9 Hz), 8.41 (1H, d, *J* = 1.6 Hz), 7.74 (1H, dd, *J* = 2.9 Hz, 1.6 Hz), 7.63

(1H, s), 7.43 (1H, dd,  $J = 7.5$  Hz, 1.7 Hz), 7.18-7.24 (4H, m), 7.13 (2H, app. t,  $J = 7.6$  Hz), 7.05 (1H, t,  $J = 7.4$  Hz), 6.84-7.00 (5H, m), 6.50 (1H, dd,  $J = 7.8$  Hz, 1.4 Hz), 5.65 (1H, s), 4.72 (1H, d,  $J = 12.0$  Hz), 4.67 (1H, d,  $J = 12.0$  Hz).

$^{13}\text{C}$  NMR (126 MHz,  $\text{C}_6\text{D}_6$ ):  $\delta$  157.6, 155.4, 148.5, 144.7, 142.9, 136.8, 136.5, 132.4, 131.8, 129.5, 129.1, 128.9, 128.6, 128.5, 127.7, 127.5, 120.0, 118.2, 117.9, 70.3, 38.3.<sup>‡</sup>

<sup>‡</sup> 2 peaks obscured.

HRMS ( $\text{ES}^+$ ):  $[\text{C}_{27}\text{H}_{22}\text{ON}_3]^+$  ( $[\text{M}+\text{H}]^+$ ) requires 404.1757; found 404.1759.

MP: 78-80 °C.

(E)-2-(3-(((5-bromopyridin-3-yl)methylene)amino)pyridin-2-yl)-2-phenylacetonitrile **82**

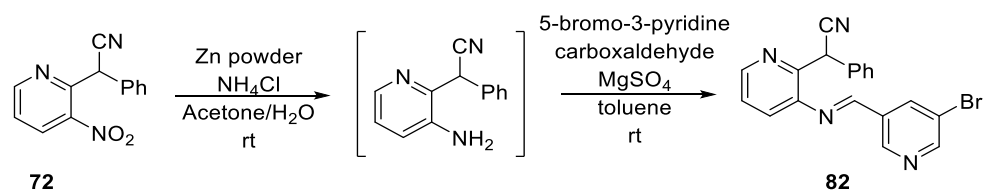

Zn powder (2.73 g, 41.8 mmol) and NH<sub>4</sub>Cl (3.35 g, 62.7 mmol) were added to a solution of nitrile **72** (1.0 g, 4.2 mmol) in 5:1 acetone/H<sub>2</sub>O (78 mL) and stirred at rt for 4.5 h. The mixture was filtered through Celite, and the filtrate was partitioned between EtOAc and H<sub>2</sub>O. The organic layer was washed with brine, dried over Na<sub>2</sub>SO<sub>4</sub>, filtered, and concentrated. The remaining residue (250 mg) was dissolved in toluene (10 mL). 5-Bromopyridinecarboxaldehyde (289 mg, 1.55 mmol) and MgSO<sub>4</sub> (719 mg, 5.97 mmol) were added, and the suspension was stirred at rt for 24 h. The mixture was filtered and concentrated. The crude product was triturated three times with ice-cooled Et<sub>2</sub>O to afford imine **82** as a yellow solid (265 mg, 0.70 mmol, 59%, contains minor impurities).

$^1\text{H}$  NMR (400 MHz,  $\text{CDCl}_3$ ):  $\delta$  8.69 (1H, d,  $J = 2.0$  Hz), 8.61 (1H, d,  $J = 2.0$  Hz), 8.36 (1H, dd,  $J = 4.8$  Hz, 1.6 Hz), 8.21 (1H, t,  $J = 2.0$  Hz), 8.16 (1H, s), 7.17-7.25 (3H, m), 7.11-7.16 (1H, dd,  $J = 7.8$  Hz, 4.8 Hz), 6.98-7.10 (3H, m), 5.74 (1H, s).

$^{13}\text{C}$  NMR (101 MHz,  $\text{CDCl}_3$ ):  $\delta$  158.0, 153.8, 150.1, 149.0, 148.4, 143.4, 137.4, 134.7, 132.4, 128.9, 128.1, 127.8, 125.5, 124.4, 121.5, 118.9, 41.1.

**HRMS (ES<sup>+</sup>):** [C<sub>19</sub>H<sub>14</sub>N<sub>4</sub><sup>79</sup>Br]<sup>+</sup> ([M+H]<sup>+</sup>) requires 377.0396; found 377.0400. [C<sub>19</sub>H<sub>14</sub>N<sub>4</sub><sup>81</sup>Br]<sup>+</sup> ([M+H]<sup>+</sup>) requires 379.0376; found 379.0379.

**MP:** 116-118 °C.

(2*RS*, 3*SR*)-2-(5'-Bromopyridin-3'-yl)-3-phenylindoline-3-carbonitrile **83** and (2*RS*, 3*RS*)-2-(5'-bromopyridin-3'-yl)-3-phenylindoline-3-carbonitrile **84**

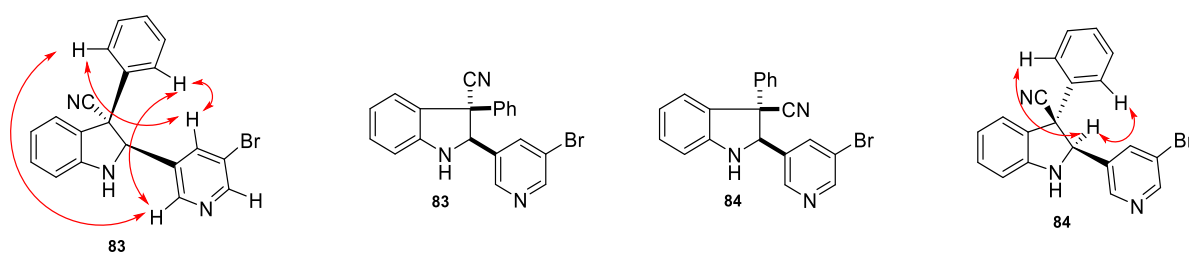

Indolines **83** and **84** were prepared according to general procedure 1, using KO<sup>t</sup>Bu (656 mg, 5.85 mmol) and imine **76** (1.10 g, 2.92 mmol) in toluene (50 mL). The reaction mixture was stirred at 0 °C for 20 min. Purification by flash pressure column chromatography (18% EtOAc/petroleum ether) afforded separately indoline **83** as a colorless solid (338 mg, 0.90 mmol, 31%) and indoline **84** as a colorless solid (580 mg, 1.54 mmol, 53%).

N.B. Stereochemistry assigned by nOe analysis, with red arrows indicating through-space interactions.

(2*RS*,3*SR*)-2-(5-Bromopyridin-3-yl)-3-phenylindoline-3-carbonitrile **83**

<sup>1</sup>H NMR (500 MHz, C<sub>6</sub>D<sub>6</sub>): δ 8.46 (1H, d, *J* = 2.0 Hz), 8.36 (1H, d, *J* = 2.0 Hz), 7.16 (1H, app. s), 7.05 (1H, td, *J* = 7.7 Hz, 1.2 Hz), 6.99 (1H, app. d, *J* = 7.7 Hz), 6.69-6.75 (3H, m), 6.60-6.68 (3H, m), 6.41 (1H, d, *J* = 7.7 Hz), 4.69 (1H, d, *J* = 3.4 Hz), 2.72 (1H, d, *J* = 3.4 Hz, NH).

<sup>13</sup>C NMR (126 MHz, C<sub>6</sub>D<sub>6</sub>): δ 151.4, 150.4, 147.8, 137.8, 134.7, 134.4, 130.7, 128.9, 128.9, 128.7, 128.2, 126.1, 121.8, 121.5, 120.7, 111.0, 71.9, 56.0.

**HRMS (ES<sup>+</sup>):** [C<sub>20</sub>H<sub>14</sub><sup>79</sup>BrN<sub>3</sub>Na]<sup>+</sup> ([M+Na]<sup>+</sup>) calc. 398.0263; found 398.0270. [C<sub>20</sub>H<sub>14</sub><sup>81</sup>BrN<sub>3</sub>Na]<sup>+</sup> ([M+Na]<sup>+</sup>) calc. 400.0244; found 400.0250.

**MP:** 133-136 °C

(2*RS*,3*RS*)-2-(5-Bromopyridin-3-yl)-3-phenylindoline-3-carbonitrile **84**

**<sup>1</sup>H NMR (500 MHz, C<sub>6</sub>D<sub>6</sub>):** δ 8.65 (1H, app. s), 8.08 (1H, app. s), 7.91 (1H, t, *J* = 1.9 Hz), 7.17-7.20 (2H, m), 6.95-7.04 (4H, m), 6.67 (1H, app. d, *J* = 7.7 Hz), 6.60 (1H, td, *J* = 7.7 Hz, 0.9 Hz), 6.43 (1H, app. d, *J* = 7.7 Hz), 4.21 (1H, d, *J* = 3.2 Hz), 2.93 (1 H, d, *J* = 3.2 Hz, NH).

**<sup>13</sup>C NMR (126 MHz, C<sub>6</sub>D<sub>6</sub>):** δ 152.3, 150.6, 148.1, 138.5, 137.4, 134.6, 130.7, 129.5, 129.2, 128.7, 127.5, 126.2, 121.5, 121.4, 118.8, 111.2, 75.4, 58.9.

**HRMS (ES<sup>+</sup>):** [C<sub>20</sub>H<sub>14</sub><sup>79</sup>BrN<sub>3</sub>Na]<sup>+</sup> ([M+Na]<sup>+</sup>) calc. 398.0263; found 398.0270. [C<sub>20</sub>H<sub>14</sub><sup>81</sup>BrN<sub>3</sub>Na]<sup>+</sup> ([M+Na]<sup>+</sup>) calc. 400.0244; found 400.0252.

**MP:** 69-70 °C.

Ethyl (2*RS*, 3*RS*)-2-(5-bromopyridin-3-yl)-3-cyanoindoline-3-carboxylate **85**

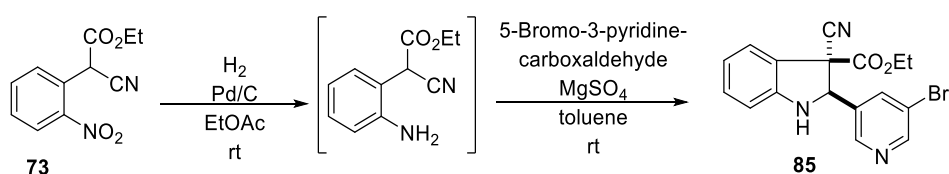

Pd/C (wet degussa type, 10% palladium by weight, 80 mg) was added to a solution of nitrile **73** (800 mg, 3.42 mmol) in EtOAc (20 mL). The suspension was degassed 3 times with hydrogen using a pump-flood procedure and placed under hydrogen for 45 min. The mixture was filtered through Celite<sup>TM</sup>, eluted with EtOAc, and concentrated at 26 °C. The resulting residue was dissolved in toluene (24 mL), and MgSO<sub>4</sub> (2.06 g, 17.1 mmol) and 5-Bromo-3-pyridinecarboxaldehyde (699 mg, 3.76 mmol) were added. The mixture was stirred at rt for 16 h, then filtered and concentrated. Purification by flash pressure column chromatography (28% EtOAc/petroleum ether) afforded imine **85** as a pale yellow solid (889 mg, 2.38 mmol, 68%, contains minor impurities).

N.B. Stereochemistry assigned by X-ray crystallography. Major diastereomer (as drawn):

**<sup>1</sup>H NMR (400 MHz, C<sub>6</sub>D<sub>6</sub>):** δ 8.69 (1H, d, *J* = 1.9 Hz), 8.60 (1H, d, *J* = 2.2 Hz), 7.85 (1H, app. t, *J* = 2.0 Hz), 7.09 (1H, d, *J* = 7.9 Hz), 6.98 (1H, td, *J* = 7.7 Hz, 1.2 Hz), 6.62 (1H, td, *J* = 7.7 Hz, 1.0 Hz), 6.34 (1H, d, *J* = 7.9 Hz), 4.66 (1H, d, *J* = 3.4 Hz), 3.35 (2H, q, *J* = 7.1 Hz), 2.72 (1H, d, *J* = 3.4 Hz, NH), 0.42 (3H, t, *J* = 7.1 Hz).

**<sup>13</sup>C NMR (101 MHz, C<sub>6</sub>D<sub>6</sub>):** δ 164.7, 152.0, 150.8, 148.1, 138.0, 134.4, 131.2, 125.5, 124.6, 121.4, 121.1, 118.4, 111.5, 70.2, 63.2, 57.5, 13.7.

**HRMS (ES<sup>+</sup>):** [C<sub>17</sub>H<sub>14</sub><sup>79</sup>BrNaN<sub>3</sub>O<sub>2</sub>]<sup>+</sup> ([M+Na]<sup>+</sup>) calc. 394.0167; found 394.0169. [C<sub>17</sub>H<sub>14</sub><sup>81</sup>BrNaN<sub>3</sub>O<sub>2</sub>]<sup>+</sup> ([M+Na]<sup>+</sup>) calc. 396.0142; found 396.0148.

**MP:** 100-102 °C.

Methyl (2*RS*,3*SR*)-2-(5-bromopyridin-3-yl)-3-phenylindoline-3-carboxylate **86** and methyl (2*RS*,3*RS*)-2-(5-bromopyridin-3-yl)-3-phenylindoline-3-carboxylate **87**

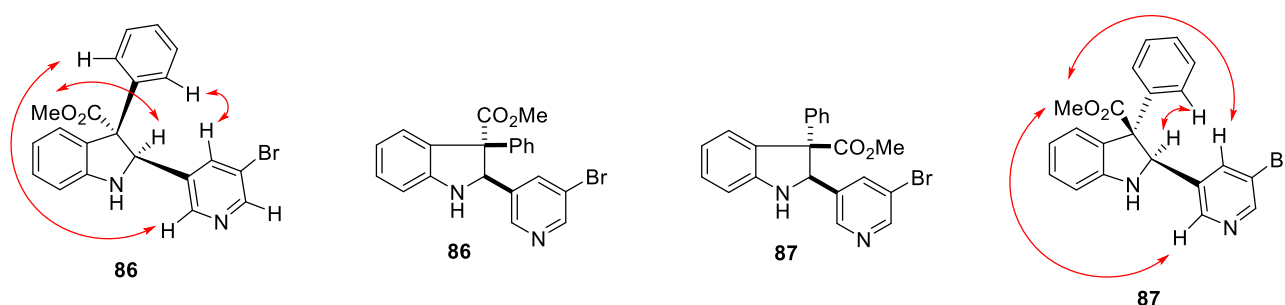

Indolines **86** and **87** were prepared according to general procedure 1, using KO<sup>t</sup>Bu (72 mg, 0.65 mmol) and imine **80** (240 mg, 0.59 mmol) in toluene (11 mL). The reaction mixture was stirred at 0 °C for 20 min. Purification by flash pressure column chromatography (18% EtOAc/petroleum ether) afforded separately indoline **86** as a colorless solid (76 mg, 0.19 mmol, 31%) and indoline **87** as a colorless solid (66 mg, 0.16 mmol, 27%).

N.B. Stereochemistry assigned by nOe analysis, with red arrows indicating through-space interactions.

Methyl (2*RS*,3*SR*)-2-(5-bromopyridin-3-yl)-3-phenylindoline-3-carboxylate **86**

<sup>1</sup>H NMR (500 MHz, C<sub>6</sub>D<sub>6</sub>): δ 8.68 (1H, d, *J* = 1.7 Hz), 8.52 (1H, d, *J* = 2.4 Hz), 7.51 (1H, d, *J* = 7.6 Hz), 7.40 (1H, t, *J* = 1.9 Hz), 7.16 (1H, obscured), 6.83 (1H, td, *J* = 7.6 Hz, 1.0 Hz), 6.69-6.79 (3H, m), 6.50 (1H, d, *J* = 7.7 Hz), 6.44 (2H, m), 5.55 (1H, d, *J* = 3.6 Hz), 3.26 (3H, s), 2.91 (1H, d, *J* = 3.3 Hz, NH).

<sup>13</sup>C NMR (126 MHz, C<sub>6</sub>D<sub>6</sub>): δ 173.7, 151.2, 150.4, 149.1, 138.8, 138.8, 137.4, 130.0, 128.6, 128.4, 127.9, 127.4, 120.5, 120.5, 110.5, 67.8, 67.2, 52.6.<sup>‡</sup>

<sup>‡</sup> 1 peak obscured.

**HRMS (ES<sup>+</sup>):** [C<sub>21</sub>H<sub>18</sub><sup>79</sup>BrN<sub>2</sub>O<sub>2</sub>]<sup>+</sup> ([M+H]<sup>+</sup>) calc. 409.0546; found 409.0538. [C<sub>21</sub>H<sub>18</sub><sup>81</sup>BrN<sub>2</sub>O<sub>2</sub>]<sup>+</sup> ([M+H]<sup>+</sup>) calc. 411.0526; found 411.0516.

MP: 118-121 °C.

Methyl (2*RS*,3*RS*)-2-(5-bromopyridin-3-yl)-3-phenylindoline-3-carboxylate **87**

<sup>1</sup>H NMR (500 MHz, C<sub>6</sub>D<sub>6</sub>): δ 8.64 (1H, d, *J* = 2.2 Hz), 8.34 (1H, d, *J* = 1.7 Hz), 7.79 (1H, t, *J* = 2.1 Hz), 7.37 (1H, d, *J* = 7.4 Hz), 7.32 (2H, m), 7.01-7.11 (4H, m), 6.77 (1H, td, *J* = 7.5 Hz, 1.0 Hz), 6.46 (1H, d, *J* = 7.7 Hz), 4.57 (1H, d, *J* = 2.4 Hz), 3.06 (1H, app. s, NH), 2.89 (3H, s).

<sup>13</sup>C NMR (126 MHz, C<sub>6</sub>D<sub>6</sub>): δ 171.0, 151.0, 150.9, 148.4, 142.8, 138.7, 137.7, 129.7, 129.5, 129.1, 128.5, 128.4, 128.4, 120.7, 120.5, 110.6, 73.0, 67.4, 51.8.

HRMS (ES<sup>+</sup>): [C<sub>21</sub>H<sub>18</sub><sup>79</sup>BrN<sub>2</sub>O<sub>2</sub>]<sup>+</sup> ([M+H]<sup>+</sup>) calc. 409.0546; found 409.0536. [C<sub>21</sub>H<sub>18</sub><sup>81</sup>BrN<sub>2</sub>O<sub>2</sub>]<sup>+</sup> ([M+H]<sup>+</sup>) calc. 411.0526; found 411.0515.

MP: 72-76 °C.

(2*RS*,3*RS*)-2-(5-Bromopyridin-3-yl)-3-(thiazol-2-yl)indoline-3-carbonitrile **88**

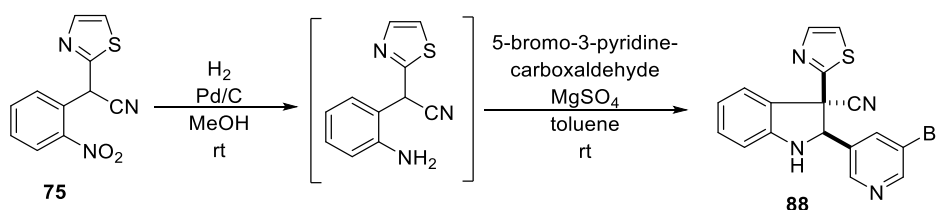

Pd/C (wet Degussa type, 30 mg) was added to a solution of nitrile **75** (300 mg, 1.22 mmol) in MeOH (12 mL). The suspension was first degassed 3 times with N<sub>2</sub> and then 3 times with H<sub>2</sub> using a pump-flood procedure. The mixture was stirred under a H<sub>2</sub> atmosphere for 18 h, then flushed with N<sub>2</sub> before being filtered through Celite<sup>TM</sup>, eluted with EtOAc, and concentrated. Purification by flash pressure column chromatography (25% EtOAc/petroleum ether) afforded an orange solid (150 mg, impure), which was re-dissolved in toluene (6 mL). MgSO<sub>4</sub> (414 mg, 3.44 mmol) and 5-bromo-3-pyridinecarboxaldehyde (166 mg, 0.89 mmol) were added, and the mixture was stirred at rt for 48 h. The mixture was filtered and concentrated. Purification by flash pressure column chromatography (40% EtOAc/petroleum ether) afforded indoline **88** as a yellow solid (62 mg, 0.16 mmol, 13%).

N.B. Stereochemistry assigned by analogy to indolines **83** and **84**.

<sup>1</sup>H NMR (500 MHz, C<sub>6</sub>D<sub>6</sub>): δ 8.54 (1H, d, *J* = 2.4 Hz), 8.46 (1H, d, *J* = 1.9 Hz), 7.42 (1H, t, *J* = 2.1 Hz), 7.07 (1H, d, *J*

= 3.3 Hz), 6.98-7.05 (2H, m), 6.62 (1H, td,  $J = 7.6$  Hz, 0.9 Hz), 6.38 (1H, d,  $J = 7.9$  Hz), 6.16 (1H, d,  $J = 3.3$  Hz), 4.72 (1H, d,  $J = 3.5$  Hz), 2.79 (1H, d,  $J = 3.3$  Hz, NH).

**$^{13}\text{C}$  NMR (126 MHz,  $\text{C}_6\text{D}_6$ ):**  $\delta$  164.5, 151.7, 150.3, 147.9, 143.8, 137.6, 133.8, 131.5, 127.4, 126.2, 121.6, 121.3, 120.8, 119.4, 111.5, 72.0, 54.7.

**HRMS (ES<sup>+</sup>):**  $[\text{C}_{17}\text{H}_{12}\text{N}_4^{79}\text{Br}^{32}\text{S}]^+$  ( $[\text{M}+\text{H}]^+$ ) requires 382.9961; found 382.9963.  $[\text{C}_{17}\text{H}_{12}\text{N}_4^{81}\text{Br}^{32}\text{S}]^+$  ( $[\text{M}+\text{H}]^+$ ) requires 384.9940; found 384.9941.

**MP:** 152-155 °C.

(2*RS*,3*SR*)-2-(3-Bromophenyl)-3-phenylindoline-3-carbonitrile **89** and (2*RS*,3*RS*)-2-(3-bromophenyl)-3-phenylindoline-3-carbonitrile **90**

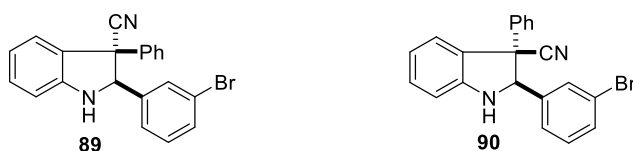

Indolines **89** and **90** were prepared according to general procedure 1, using  $\text{KO}^t\text{Bu}$  (278 mg, 2.48 mmol) and imine **77** (465 mg, 1.24 mmol) in toluene (20 mL). The reaction mixture was stirred at 0 °C for 15 min. Purification by flash pressure column chromatography (13%  $\text{Et}_2\text{O}$ /petroleum ether) afforded separately indoline **89** as a colorless solid (118 mg, 0.31 mmol, 25%) and indoline **90** as a colorless solid (194 mg, 0.52 mmol, 42%).

N.B. Stereochemistry assigned by analogy to previously reported similar indolines.<sup>6</sup>

(2*RS*,3*SR*)-2-(3-Bromophenyl)-3-phenylindoline-3-carbonitrile **89**

**$^1\text{H}$  NMR (500 MHz,  $\text{C}_6\text{D}_6$ ):**  $\delta$  2.78 (1H, d,  $J = 3.3$  Hz), 4.84 (1H, d,  $J = 3.3$  Hz), 6.41 (1H, app. d,  $J = 7.6$  Hz), 6.57 (1H, t,  $J = 7.8$  Hz), 6.65 (1H, td,  $J = 7.5$  Hz, 1.0 Hz), 6.68-6.82 (5H, m), 6.90 (1H, app. d,  $J = 7.8$  Hz), 7.02-7.09 (3H, m), 7.14 (1H, t,  $J = 1.8$  Hz).

**$^{13}\text{C}$  NMR (125.75 MHz,  $\text{C}_6\text{D}_6$ ):**  $\delta$  55.9, 74.4, 110.8, 121.5, 122.0, 122.8, 126.1, 126.8, 128.4, 128.7, 128.7, 129.0, 129.9, 130.5, 131.3, 131.8, 135.1, 139.1, 150.7.



**HRMS (ESI<sup>+</sup>, m/z):** [C<sub>21</sub>H<sub>16</sub><sup>79</sup>BrN<sub>2</sub>]<sup>+</sup> ([M+H]<sup>+</sup>) calc. 375.0491; found 375.0485. [C<sub>21</sub>H<sub>16</sub><sup>81</sup>BrN<sub>2</sub>]<sup>+</sup> ([M+H]<sup>+</sup>) calc. 377.0471; found 377.0465.

**MP:** 140-143 °C.

(2*RS*,3*RS*)-2-(3-bromophenyl)-3-phenylindoline-3-carbonitrile **90**

**<sup>1</sup>H NMR (500 MHz, C<sub>6</sub>D<sub>6</sub>):** δ 3.01 (1H, d, *J* = 3.0 Hz), 4.35 (1H, d, *J* = 3.0 Hz), 6.42 (1H, app. d, *J* = 7.9 Hz), 6.60 (1H, dt, *J* = 7.5 Hz, 0.9 Hz), 6.69-6.78 (2H, m), 6.97-7.06 (5H, m), 7.22-7.30 (3H, m), 7.40 (1H, t, *J* = 1.8 Hz).

**<sup>13</sup>C NMR (125.75 MHz, C<sub>6</sub>D<sub>6</sub>):** δ 58.9, 77.8, 111.0, 118.9, 121.2, 123.0, 126.2, 127.0, 128.0, 128.4, 129.0, 129.4, 130.5, 130.6, 131.7, 132.6, 138.3, 139.6, 150.3.

**HRMS (ESI<sup>+</sup>, m/z):** [C<sub>21</sub>H<sub>16</sub><sup>79</sup>BrN<sub>2</sub>]<sup>+</sup> ([M+H]<sup>+</sup>) calc. 375.0491; found 375.0484. [C<sub>21</sub>H<sub>16</sub><sup>81</sup>BrN<sub>2</sub>]<sup>+</sup> ([M+H]<sup>+</sup>) calc. 377.0471; found 377.0463.

**MP:** 120-122 °C.

(2*SR*,3*RS*)-2-(4-Bromofuran-2-yl)-3-phenylindoline-3-carbonitrile **92**

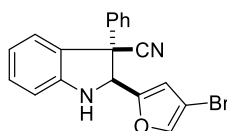

Indoline **92** was prepared according to general procedure 1, using KO<sup>t</sup>Bu (109 mg, 0.98 mmol) and imine **79** (325 mg, 0.89 mmol) in toluene (12 mL). The reaction mixture was stirred at 15 °C for 15 min. Purification by flash pressure column chromatography (15% Et<sub>2</sub>O/petroleum ether) afforded indoline **92** as a colorless solid (240 mg, 0.65 mmol, 73%).

N.B. Stereochemistry assigned by analogy to previously reported similar indolines.<sup>6</sup>

**<sup>1</sup>H NMR (400 MHz, C<sub>6</sub>D<sub>6</sub>):** δ 3.10 (1H, d, *J* = 2.5 Hz, NH), 4.47 (1H, d, *J* = 2.5 Hz), 6.33 (1H, app. s), 6.38 (1H, app. d, *J* = 7.8 Hz), 6.57 (1H, td, *J* = 7.5 Hz, 0.8 Hz), 6.80 (1H, d, *J* = 7.5 Hz), 6.87 (1H, d, *J* = 0.7 Hz), 6.94-7.06 (4H, m), 7.32-7.41 (2H, m).

**<sup>13</sup>C NMR (100.6 MHz, C<sub>6</sub>D<sub>6</sub>):** δ 57.7, 71.1, 101.1, 110.9, 112.9, 119.0, 121.3, 126.1, 127.7, 127.8, 129.0, 129.5, 130.6, 139.2, 141.9, 150.3, 153.4.

**HRMS (ESI<sup>+</sup>, m/z):** [C<sub>19</sub>H<sub>13</sub><sup>79</sup>BrNaN<sub>2</sub>O]<sup>+</sup> ([M+Na]<sup>+</sup>) calc. 387.0104; found 387.0097. [C<sub>19</sub>H<sub>13</sub><sup>81</sup>BrNaN<sub>2</sub>O]<sup>+</sup> ([M+Na]<sup>+</sup>) calc. 389.0083; found 389.0076.

**MP:** 137-140 °C.

(2*R*,3*R*)-2-(5-(Benzyloxy)pyridin-3-yl)-3-phenylindoline-3-carbonitrile (**(R,R)-15**) and (2*S*,3*S*)-2-(5-(benzyloxy)pyridin-3-yl)-3-phenylindoline-3-carbonitrile (**(S,S)-15**)

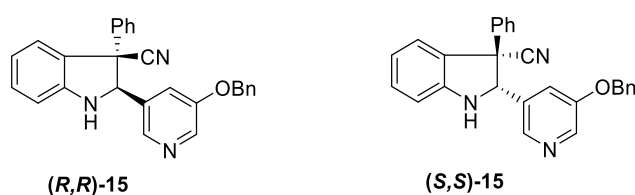

(2*R*,3*R*)-2-(5-(Benzyloxy)pyridin-3-yl)-3-phenylindoline-3-carbonitrile (**(R,R)-15**)

Catalyst **16** (70 mg, 0.11 mmol) was added to a solution of imine **13** (880 mg, 2.18 mmol) in toluene (33 mL), and the suspension was stirred at -30 °C for 30 min. CsOH·H<sub>2</sub>O (732 mg, 4.36 mmol) was added and stirred at -30 °C for 16 h. The mixture was diluted with EtOAc (40 mL), and NH<sub>4</sub>Cl (sat. aq., 40 mL) was added. The mixture was allowed to warm to rt, the organic and aqueous layers were separated, and the aqueous layer was extracted with EtOAc. The combined organic layers were washed with brine, dried over Na<sub>2</sub>SO<sub>4</sub>, filtered, and concentrated. Purification by flash pressure column chromatography (35% EtOAc/petroleum ether) afforded indoline (**(R,R)-15**) as a colorless solid (787 mg, 1.95 mmol, d.r. 7:1, e.r. 17:83, 89%). Resolution by semi-preparatory chiral HPLC (YMC chiral amylose SA, 5% <sup>i</sup>PrOH, 95% hexane, 5.0 mL/min) afforded indoline (**(R,R)-15**) as a colorless solid (d.r. > 20:1, e.r. > 99:1).

(2*S*,3*S*)-2-(5-(Benzyloxy)pyridin-3-yl)-3-phenylindoline-3-carbonitrile (**(S,S)-15**)

Indoline (**(S,S)-15**) was prepared in an analogous manner to indoline (**(R,R)-15**) using catalyst **14** (47 mg, 0.074 mmol), imine **13** (600 mg, 1.49 mmol), and CsOH·H<sub>2</sub>O (500 mg, 2.97 mmol) in toluene (19 mL). The reaction mixture was stirred at -30 °C for 16 h. Purification by flash pressure column chromatography (35% EtOAc/petroleum ether) afforded indoline (**(S,S)-15**) as a colorless solid (538 mg, 1.33 mmol, d.r. 10:1, e.r. 88:12, 90%). Resolution by semi-preparatory chiral HPLC (YMC chiral amylose SA, 5% <sup>i</sup>PrOH, 95% hexane, 5.0 mL/min) afforded indoline (**(S,S)-15**) as a colorless solid (d.r. > 20:1, e.r. > 99:1).

N.B. Stereochemistry assigned by X-ray crystallography of **17**.

<sup>1</sup>H (400 MHz, C<sub>6</sub>D<sub>6</sub>): δ 8.58 (1H, d, *J* = 2.9 Hz), 7.91 (1H, d, *J* = 1.4 Hz), 7.63 (1H, t, *J* = 2.0 Hz), 7.27 (2H, m), 6.93-7.14 (7H, m), 6.74 (1H, d, *J* = 7.6 Hz), 6.61 (1H, t, *J* = 7.6 Hz), 6.44 (1H, d, *J* = 8.0 Hz), 4.73 (1H, d, *J* = 11.8 Hz), 4.69 (1H, d, *J* = 11.8 Hz), 4.40 (1H, d, *J* = 3.2 Hz), 3.06 (1H, d, *J* = 3.0 Hz, NH).<sup>†</sup>

<sup>13</sup>C (101 MHz, C<sub>6</sub>D<sub>6</sub>): δ 155.3, 150.6, 142.2, 140.1, 137.5, 136.8, 133.0, 130.3, 129.1, 128.7, 128.6, 127.5, 125.9, 121.0, 120.5, 119.0, 110.8, 75.7, 70.4, 58.6.<sup>‡</sup>

<sup>†</sup> 2 peaks obscured.

<sup>‡</sup> 3 peaks obscured.

HRMS (ES<sup>+</sup>): [C<sub>27</sub>H<sub>22</sub>ON<sub>3</sub>]<sup>+</sup> ([M+H]<sup>+</sup>) requires 404.1757; found 404.1763.

MP: 48-50 °C.

[α]<sub>D</sub><sup>25.0</sup> (*R,R*) = +26 (*c* = 0.1, CHCl<sub>3</sub>); [α]<sub>D</sub><sup>25.0</sup> (*S,S*) = -19 (*c* = 0.1, CHCl<sub>3</sub>).

Chiral HPLC: (Chiralpak IA, 10% *i*PrOH, 90% hexane, 1.0 mL/min, λ = 254 nm, 20 μL injection): τ<sub>R</sub> (*R,R*) = 33.2 min, τ<sub>R</sub> (*S,S*) = 27.5 min.

(2*RS*, 3*SR*)-1-Acetyl-2-(5'-bromopyridin-3'-yl)-3-phenylindoline-3-carbonitrile **93**

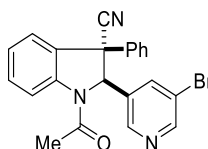

Indoline **93** was prepared according to general procedure 2, using indoline **83** (250 mg, 0.66 mmol), acetyl chloride (57 μL, 0.80 mmol), and pyridine (64 μL, 0.80 mmol) in CH<sub>2</sub>Cl<sub>2</sub> (13 mL). The reaction mixture was stirred at rt for 15 min. Purification by flash pressure column chromatography (30% EtOAc/petroleum ether) afforded indoline **93** as a colorless solid (270 mg, 0.65 mmol, 98%).

<sup>1</sup>H NMR (500 MHz, C<sub>6</sub>D<sub>6</sub>, 348 K): δ 1.64 (3H, s), 5.62 (1H, s), 6.71-6.84 (6H, m), 6.88 (2H, m), 7.08 (1H, t, *J* = 7.8 Hz), 7.87 (1H, s), 8.10 (1H, br. s), 8.23 (1H, d, *J* = 2.2 Hz).

<sup>13</sup>C NMR (125.75 MHz, C<sub>6</sub>D<sub>6</sub>, 348 K): δ 24.0, 55.8, 72.9, 117.6, 120.8, 121.4, 125.7, 126.8, 129.1, 129.1, 129.5, 131.6, 133.7, 134.3, 137.4, 144.6, 146.9, 151.3, 168.2.<sup>†</sup>

† 1 peak obscured.

**HRMS (ESI<sup>+</sup>, m/z):** [C<sub>22</sub>H<sub>16</sub><sup>79</sup>BrN<sub>3</sub>NaO]<sup>+</sup> ([M+Na]<sup>+</sup>) calc. 440.0369; found 440.0371. [C<sub>22</sub>H<sub>16</sub><sup>81</sup>BrN<sub>3</sub>NaO]<sup>+</sup> ([M+Na]<sup>+</sup>) calc. 442.0349; found 442.0353.

**MP:** 126-128 °C.

(2*RS*, 3*RS*)-1-Acetyl-2-(5'-bromopyridin-3'-yl)-3-phenylindoline-3-carbonitrile **94**

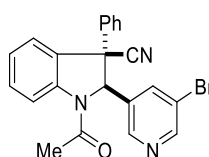

Indoline **94** was prepared according to general procedure 2, using indoline **84** (400 mg, 1.06 mmol), acetyl chloride (91 μL, 1.3 mmol), and pyridine (103 μL, 1.28 mmol) in CH<sub>2</sub>Cl<sub>2</sub> (20 mL). The reaction mixture was stirred at rt for 15 min. Purification by flash pressure column chromatography (30% EtOAc/petroleum ether) afforded indoline **94** as a colorless solid (379 mg, 0.91 mmol, 85%).

**<sup>1</sup>H NMR (500 MHz, C<sub>6</sub>D<sub>6</sub>, 348 K):** δ 1.49 (3H, s), 5.18 (1H, br. s), 6.74 (1H, t, *J* = 7.8 Hz), 6.96-7.03 (4H, m), 7.06 (1H, t, *J* = 7.8 Hz), 7.17 (2H, m), 7.55 (1H, app. t, *J* = 1.8 Hz), 8.04 (1H, br. s), 8.41 (1H, d, *J* = 1.6 Hz), 8.56 (1H, d, *J* = 2.2 Hz).

**<sup>13</sup>C NMR (125.75 MHz, C<sub>6</sub>D<sub>6</sub>, 348 K):** δ 23.7, 57.9, 74.0, 117.5, 118.9, 121.8, 126.1, 126.2, 126.5, 129.5, 129.8, 130.2, 131.4, 136.0, 136.8, 140.8, 143.4, 147.1, 152.9, 167.9.

**HRMS (ESI<sup>+</sup>, m/z):** [C<sub>22</sub>H<sub>16</sub><sup>79</sup>BrN<sub>3</sub>NaO]<sup>+</sup> ([M+Na]<sup>+</sup>) calc. 440.0369; found 440.0370. [C<sub>22</sub>H<sub>16</sub><sup>81</sup>BrN<sub>3</sub>NaO]<sup>+</sup> ([M+Na]<sup>+</sup>) calc. 442.0349; found 442.0350.

**MP:** 90-94 °C.

(2*RS*,3*SR*)-1-Acetyl-3-phenyl-2-(5'-((trimethylsilyl)ethynyl)pyridin-3'-yl)indoline-3-carbonitrile **95**

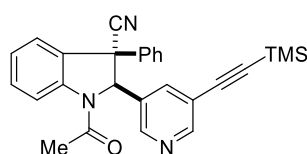

A suspension of indoline **93** (120 mg, 0.29 mmol), PdCl<sub>2</sub>(PPh<sub>3</sub>)<sub>2</sub> (10 mg, 0.014 mmol), and CuI (3.0 mg, 0.014 mmol) in diisopropylamine (4 mL) was degassed and put under an Ar atmosphere before ethynyltrimethylsilane (50 μL, 0.34 mmol) was added. The mixture was stirred at 65 °C for 5.5 h, then filtered through Celite™. The filtrate was washed with water, then brine, dried over MgSO<sub>4</sub>, filtered, and concentrated. Purification by flash pressure column chromatography (30% EtOAc/petroleum ether) afforded alkyne **95** as a colorless solid (121 mg, 0.28 mmol, 96%).

<sup>1</sup>H NMR (500 MHz, C<sub>6</sub>D<sub>6</sub>, 348 K): δ 0.12 (9H, s), 1.60 (3H, s), 5.62 (1H, s), 6.67-6.83 (5H, m), 6.85-6.94 (3H, m), 7.06 (1H, td, *J* = 7.8 Hz, 1.4 Hz), 7.85 (1H, s), 8.15 (1H, br. s), 8.43 (1H, s).

<sup>13</sup>C NMR (125.75 MHz, C<sub>6</sub>D<sub>6</sub>, 348 K): δ 0.02, 24.0, 55.9, 73.3, 99.5, 102.0, 117.7, 120.5, 121.5, 125.6, 126.7, 129.1, 129.2, 129.4, 131.5, 132.2, 133.9, 137.1, 144.8, 148.2, 153.0, 168.2. ‡

‡ 1 peak obscured.

HRMS (ESI<sup>+</sup>, *m/z*): [C<sub>27</sub>H<sub>25</sub>N<sub>3</sub>NaOSi]<sup>+</sup> ([M+Na]<sup>+</sup>) calc. 458.1659; found 458.1655.

MP: 125-127 °C.

(2*RS*,3*RS*)-1-Acetyl-3-phenyl-2-(5-((trimethylsilyl)ethynyl)pyridin-3-yl)indoline-3-carbonitrile **96**

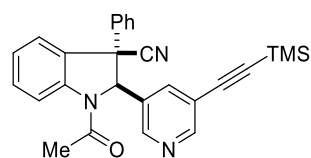

A suspension of indoline **94** (150 mg, 0.36 mmol), PdCl<sub>2</sub>(PPh<sub>3</sub>)<sub>2</sub> (13 mg, 0.018 mmol), and CuI (3.5 mg, 0.018 mmol) in diisopropylamine (4 mL) was degassed and put under an Ar atmosphere before ethynyltrimethylsilane (61 μL, 0.43 mmol) was added. The mixture was stirred at 65 °C for 5.5 h, then filtered through Celite™. The filtrate was washed three times with water, then with brine, dried over MgSO<sub>4</sub>, filtered, and concentrated. Purification by flash pressure column chromatography (30% EtOAc/petroleum ether) afforded alkyne **96** as a colorless solid (141 mg, 0.32 mmol, 89%).

<sup>1</sup>H NMR (500 MHz, C<sub>6</sub>D<sub>6</sub>, 348 K): δ 0.14 (9H, s), 1.47 (3H, s), 5.16 (1H, s), 6.71 (1H, t, *J* = 7.8 Hz), 6.95-7.01 (4H, m), 7.03 (1H, t, *J* = 7.8 Hz), 7.13-7.18 (2H, obscured), 7.59 (1H, s), 8.10 (1H, br. s), 8.47 (1H, app. s), 8.78 (1H, app. s).

<sup>13</sup>C NMR (125.75 MHz, C<sub>6</sub>D<sub>6</sub>, 348 K): δ 0.04, 23.6, 58.0, 74.5, 99.9, 102.2, 117.6, 118.9, 126.0, 126.2, 126.4, 129.4, 129.7, 130.2, 131.3, 134.0, 136.6, 141.1, 143.6, 148.0, 154.6, 167.9. †

† 1 peak obscured.

HRMS (ESI<sup>+</sup>, m/z): [C<sub>27</sub>H<sub>26</sub>N<sub>3</sub>O<sub>3</sub>Si]<sup>+</sup> ([M+H]<sup>+</sup>) calc. 436.1840; found 436.1850.

MP: 155-157 °C.

(2*RS*,3*SR*)-1-Acetyl-2-(5-ethynylpyridin-3-yl)-3-phenylindoline-3-carbonitrile **97**

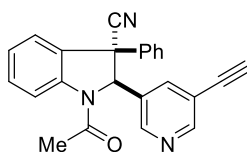

TBAF (1.0 M in THF, 0.3 mL, 0.3 mmol) was added dropwise to a solution of alkyne **95** (110 mg, 0.25 mmol) in THF (5 mL) at 0 °C and stirred at rt for 15 min. The mixture was diluted with EtOAc (10 mL) and washed three times with water, then with brine, dried over MgSO<sub>4</sub>, filtered, and concentrated. Purification by flash pressure column chromatography (36% EtOAc/petroleum ether) afforded alkyne **97** as a colorless oil (90 mg, 0.25 mmol, 99%).

<sup>1</sup>H NMR (500 MHz, C<sub>6</sub>D<sub>6</sub>, 348 K): δ 1.60 (3H, s), 2.58 (1H, s), 5.61 (1H, s), 6.70-6.81 (5H, m), 6.83 (1H, app. s), 6.89 (2H, m), 7.07 (1H, t, *J* = 7.8 Hz), 7.86 (1H, app. s), 8.17 (1H, br. s), 8.36 (1H, app. s).

<sup>13</sup>C NMR (125.75 MHz, C<sub>6</sub>D<sub>6</sub>, 348 K): δ 24.0, 55.9, 73.2, 80.3, 81.6, 117.7, 119.5, 121.4, 125.6, 126.7, 129.1, 129.1, 129.4, 131.5, 132.3, 133.8, 137.5, 144.8, 148.5, 153.0, 168.2. †

† 1 peak obscured.

HRMS (ESI<sup>+</sup>, m/z): [C<sub>24</sub>H<sub>17</sub>N<sub>3</sub>NaO]<sup>+</sup> ([M+Na]<sup>+</sup>) calc. 386.1264; found 386.1268.

(2*RS*,3*RS*)-1-acetyl-2-(5-ethynylpyridin-3-yl)-3-phenylindoline-3-carbonitrile **98**

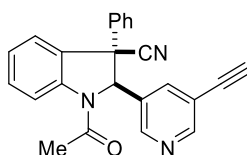

TBAF (1.0 M in THF, 0.35 mL, 0.35 mmol) was added dropwise to a solution of alkyne **96** (120 mg, 0.28 mmol) in THF (5 mL) at 0 °C and stirred at rt for 15 min. The mixture was diluted with EtOAc (10 mL) and washed three times with water, then with brine, dried over MgSO<sub>4</sub>, filtered, and concentrated. Purification by flash pressure column chromatography (36% EtOAc/petroleum ether) afforded alkyne **98** as a colorless oil (94 mg, 0.26 mmol, 92%).

**<sup>1</sup>H NMR (500 MHz, C<sub>6</sub>D<sub>6</sub>, 348 K):** δ 1.45 (3H, s), 2.66 (1H, s), 5.16 (1H, s), 6.73 (1H, t, *J* = 7.6 Hz), 6.95-7.03 (4H, m), 7.05 (1H, t, *J* = 7.9 Hz), 7.14-7.20 (2H, obscured), 7.53 (1H, app. s), 8.12 (1H, br. s), 8.46 (1H, app. s), 8.71 (1H, app. s).

**<sup>13</sup>C NMR (125.75 MHz, C<sub>6</sub>D<sub>6</sub>, 348 K):** δ 23.6, 58.0, 74.4, 80.5, 82.1, 117.5, 118.9, 120.5, 126.0, 126.2, 126.4, 129.4, 129.7, 130.2, 131.3, 133.9, 137.0, 141.0, 143.6, 148.3, 154.5, 167.9.

**HRMS (ESI<sup>+</sup>, m/z):** [C<sub>24</sub>H<sub>17</sub>N<sub>3</sub>NaO]<sup>+</sup> ([M+Na]<sup>+</sup>) calc. 386.1264; found 386.1265.

Ethyl (2*RS*,3*RS*)-1-acetyl-2-(5-bromopyridin-3-yl)-3-cyanoindoline-3-carboxylate **99**

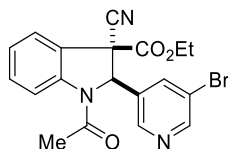

Indoline **99** was prepared according to general procedure 2, using indoline **85** (840 mg, 2.26 mmol), acetyl chloride (0.20 mL, 2.7 mmol), and pyridine (0.20 mL, 2.7 mmol) in CH<sub>2</sub>Cl<sub>2</sub> (35 mL). The reaction mixture was stirred at rt for 15 min. Purification by flash pressure column chromatography (36% EtOAc/petroleum ether) afforded indoline **99** as a colorless solid (819 mg, 1.97 mmol, 87%).

**<sup>1</sup>H NMR (500 MHz, C<sub>6</sub>D<sub>6</sub>, 348 K):** δ 0.63 (3H, t, *J* = 7.1 Hz), 1.55 (3H, s), 3.48 (2H, q, *J* = 7.1 Hz), 5.73 (1H, s), 6.77 (1H, t, *J* = 7.6 Hz), 7.00 (1H, t, *J* = 7.8 Hz), 7.36 (1H, t, *J* = 1.8 Hz), 7.72 (1H, br. s), 8.25 (1H, d, *J* = 1.6 Hz), 8.44 (1H, d, *J* = 1.8 Hz).<sup>†</sup>

**<sup>13</sup>C NMR (125.75 MHz, C<sub>6</sub>D<sub>6</sub>, 348 K):** δ 13.3, 13.4, 55.6, 63.6, 69.5, 116.7, 117.5, 120.8, 125.0, 125.2, 127.1, 131.4, 133.6, 137.2, 143.5, 147.2, 152.1, 163.9, 167.3.

<sup>†</sup> 1 peak obscured.

**HRMS (ESI<sup>+</sup>, m/z):** [C<sub>19</sub>H<sub>16</sub><sup>79</sup>BrNaN<sub>3</sub>O<sub>3</sub>]<sup>+</sup> ([M+Na]<sup>+</sup>) calc. 436.0273; found 436.0276. [C<sub>19</sub>H<sub>16</sub><sup>81</sup>BrNaN<sub>3</sub>O<sub>3</sub>]<sup>+</sup> ([M+Na]<sup>+</sup>) calc. 438.0248; found 438.0257.

**MP:** 91-93 °C.

Methyl (2*RS*,3*SR*)-1-acetyl-2-(5-bromopyridin-3-yl)-3-phenylindoline-3-carboxylate **100**

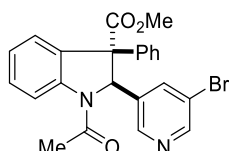

Indoline **100** was prepared according to general procedure 2, using indoline **86** (65 mg, 0.16 mmol), acetyl chloride (14  $\mu$ L, 0.19 mmol), and pyridine (15  $\mu$ L, 0.19 mmol) in CH<sub>2</sub>Cl<sub>2</sub> (5 mL). The reaction mixture was stirred at rt for 15 min. Purification by flash pressure column chromatography (30% EtOAc/petroleum ether) afforded indoline **100** as a colorless paste (72 mg, 0.16 mmol, 99%).

**<sup>1</sup>H NMR (500 MHz, C<sub>6</sub>D<sub>6</sub>, 348 K):**  $\delta$  1.83 (3H, s), 3.19 (3H, s), 6.31 (1H, s), 6.72-6.77 (2H, m), 6.77-6.81 (3H, m), 6.90 (1H, td,  $J$  = 7.7 Hz, 1.0 Hz), 7.00 (1H, app. s), 7.15 (1H, obscured), 7.30 (1H, d,  $J$  = 7.7 Hz), 8.02 (1H, d,  $J$  = 1.4 Hz), 8.24 (1H, d,  $J$  = 2.1 Hz), 8.41 (1H, br. s).

**<sup>13</sup>C NMR (125.75 MHz, C<sub>6</sub>D<sub>6</sub>, 348 K):**  $\delta$  23.7, 52.8, 67.9, 69.6, 117.5, 120.4, 124.4, 127.9, 128.1, 128.6, 129.5, 130.4, 136.2, 136.9, 137.1, 144.7, 147.1, 150.3, 167.9, 172.6.<sup>†</sup>

<sup>†</sup> 1 peak obscured.

**HRMS (ES<sup>+</sup>):** [C<sub>23</sub>H<sub>20</sub><sup>79</sup>BrO<sub>3</sub>N<sub>2</sub>]<sup>+</sup> ([M+H]<sup>+</sup>) calc. 451.0652; found 451.0651. [C<sub>23</sub>H<sub>20</sub><sup>81</sup>BrO<sub>3</sub>N<sub>2</sub>]<sup>+</sup> ([M+H]<sup>+</sup>) calc. 453.0631; found 453.0627.

(2*RS*,3*RS*)-1-acetyl-2-(5-bromopyridin-3-yl)-3-(thiazol-2-yl)indoline-3-carbonitrile **102**

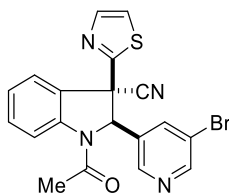

Indoline **102** was prepared according to general procedure 2, using indoline **88** (52 mg, 0.14 mmol), acetyl chloride (24  $\mu$ L, 0.33 mmol), and pyridine (26  $\mu$ L, 0.33 mmol) in CH<sub>2</sub>Cl<sub>2</sub> (3 mL). The reaction mixture was stirred



at rt for 1 h. NaHCO<sub>3</sub> (saturated aq., 3 mL) was added, and the mixture was stirred at rt for a further 10 min. Purification by flash pressure column chromatography (42% EtOAc/petroleum ether) afforded indoline **102** as a pale yellow solid (55 mg, 0.13 mmol, 92%).

<sup>1</sup>H NMR (400 MHz, CDCl<sub>3</sub>): δ 2.24 (3H, br. s), 6.08 (1H, br. s), 7.24 (1H, d, *J* = 3.3 Hz), 7.28-7.35 (2H, m), 7.49 (1H, d, *J* = 7.6 Hz), 7.61 (1H, td, *J* = 7.9 Hz, 1.2 Hz), 7.80 (1H, d, *J* = 3.3 Hz), 8.07 (1H, d, *J* = 1.9 Hz), 8.36 (1H, br. s), 8.43 (1H, d, *J* = 1.3 Hz).

<sup>13</sup>C NMR (100.6 MHz, CDCl<sub>3</sub>): δ 24.2, 53.2, 71.5, 117.7, 118.6, 120.5, 121.9, 125.8, 126.4, 132.2, 132.4, 136.9, 143.3, 143.9, 146.3, 151.3, 162.2, 168.0.<sup>†</sup>

<sup>†</sup> 1 peak obscured.

HRMS (ES<sup>+</sup>): [C<sub>19</sub>H<sub>14</sub><sup>79</sup>BrN<sub>4</sub>O<sup>32</sup>S]<sup>+</sup> ([M+H]<sup>+</sup>) calc. 425.0066; found 425.0066. [C<sub>19</sub>H<sub>14</sub><sup>81</sup>BrN<sub>4</sub>O<sup>32</sup>S]<sup>+</sup> ([M+H]<sup>+</sup>) calc. 427.0046; found 427.0045.

MP: 188-190 °C.

(2*RS*,3*SR*)-1-Acetyl-2-(3-bromophenyl)-3-phenylindoline-3-carbonitrile **103**

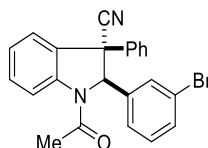

Indoline **103** was prepared according to general procedure 2, using indoline **89** (100 mg, 0.27 mmol), acetyl chloride (23 μL, 0.32 mmol), and pyridine (26 μL, 0.32 mmol) in CH<sub>2</sub>Cl<sub>2</sub> (6 mL). The reaction mixture was stirred at rt for 25 min. Purification by flash pressure column chromatography (15% EtOAc/petroleum ether) afforded indoline **103** as a colorless solid (97 mg, 0.23 mmol, 87%).

<sup>1</sup>H NMR (500 MHz, C<sub>6</sub>D<sub>6</sub>, 348 K): δ 1.62 (3H, s), 5.52 (1H, s), 6.33 (1H, t, *J* = 7.8 Hz), 6.40 (1H, d, *J* = 7.8 Hz), 6.61 (1H, br. s), 6.73-6.88 (6H, m), 6.93 (2H, app. d, *J* = 7.3 Hz), 7.13 (1H, td, *J* = 7.7 Hz, 1.4 Hz), 8.48 (1H, br. s).

<sup>13</sup>C (125.75 MHz, C<sub>6</sub>D<sub>6</sub>, 348 K): δ 24.1, 56.2, 75.1, 117.9, 121.7, 123.1, 125.5, 125.7, 126.6, 128.8, 128.8, 129.2, 130.3, 131.3, 131.4, 131.8, 134.2, 139.2, 145.2, 168.6.<sup>‡</sup>

<sup>‡</sup> 1 peak obscured.

**HRMS (ESI<sup>+</sup>, m/z):** [C<sub>23</sub>H<sub>17</sub><sup>79</sup>BrNaN<sub>2</sub>O]<sup>+</sup> ([M+Na]<sup>+</sup>) calc. 439.0422; found 439.0415.

**MP:** 125-128 °C.

(2*RS*,3*RS*)-1-Acetyl-2-(3-bromophenyl)-3-phenylindoline-3-carbonitrile **104**

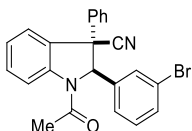

Indoline **104** was prepared according to general procedure 2, using indoline **90** (170 mg, 0.45 mmol), acetyl chloride (39  $\mu$ L, 0.54 mmol), and pyridine (44  $\mu$ L, 0.54 mmol) in CH<sub>2</sub>Cl<sub>2</sub> (10 mL). The reaction mixture was stirred at rt for 25 min. Purification by flash pressure column chromatography (16% EtOAc/petroleum ether) afforded indoline **104** as a colorless solid (179 mg, 0.43 mmol, 95%).

**<sup>1</sup>H NMR (500 MHz, C<sub>6</sub>D<sub>6</sub>, 348 K):**  $\delta$  1.48 (3H, s), 5.08 (1H, s), 6.68 (1H, t, *J* = 7.9 Hz), 6.77 (1H, t, *J* = 7.6 Hz), 6.90 (1H, d, *J* = 7.9 Hz), 6.96-7.04 (3H, m), 7.06 (1H, d, *J* = 7.6 Hz), 7.13 (1H, t, *J* = 7.9 Hz), 7.19 (1H, d, *J* = 8.2 Hz), 7.20-7.25 (2H, m), 7.37 (1H, s), 8.42 (1H, br. s).

**<sup>13</sup>C NMR (125.75 MHz, C<sub>6</sub>D<sub>6</sub>, 348 K):**  $\delta$  23.8, 58.4, 76.4, 117.7, 118.8, 124.0, 125.3, 125.9, 126.2, 126.4, 129.3, 130.0, 130.2, 130.5, 131.2, 131.6, 133.2, 141.0, 141.6, 144.1, 168.3.

**HRMS (ESI<sup>+</sup>, m/z):** C<sub>23</sub>H<sub>17</sub><sup>79</sup>BrNaN<sub>2</sub>O<sup>+</sup> ([M+Na]<sup>+</sup>) calc. 439.0422; found 439.0414.

**MP:** 149-152 °C.

(2*RS*,3*RS*)-1-Acetyl-2-(5-bromofuran-2-yl)-3-phenylindoline-3-carbonitrile **105** and (2*RS*,3*SR*)-1-acetyl-2-(5-bromofuran-2-yl)-3-phenylindoline-3-carbonitrile **106**

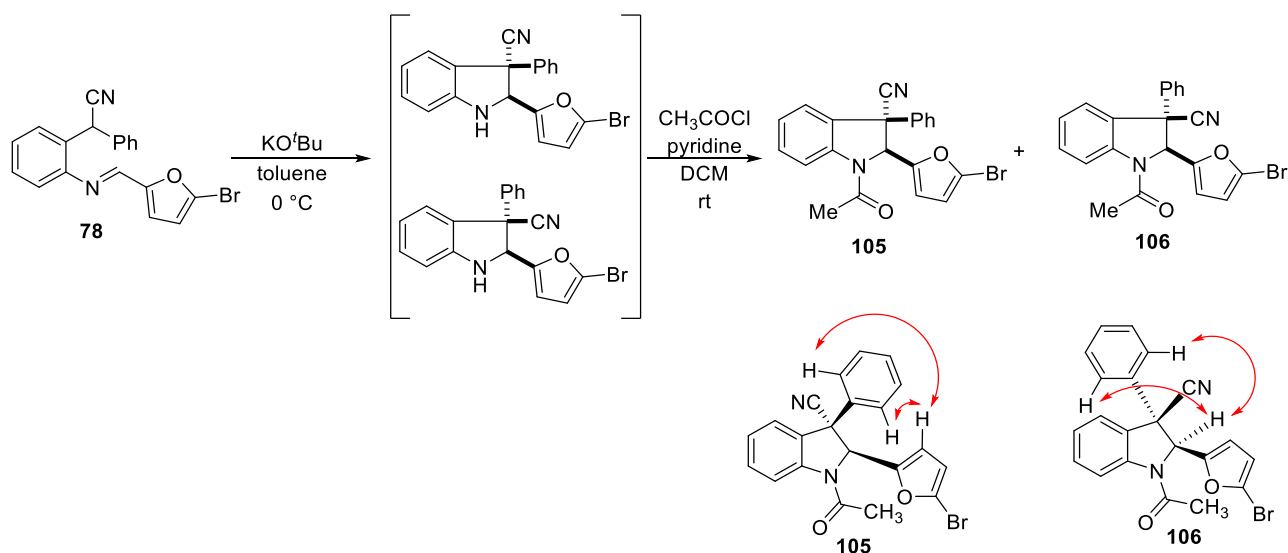

KO<sup>t</sup>Bu (68 mg, 0.60 mmol) was added to a solution of imine **78** (200 mg, 0.55 mmol) in toluene (8 mL) and stirred at 0 °C for 10 min. NH<sub>4</sub>Cl (saturated aq., 6 mL) was added, and the mixture was extracted with EtOAc. The combined organic extracts were washed with brine, dried over MgSO<sub>4</sub>, filtered. The resulting residue (200 mg) was dissolved in CH<sub>2</sub>Cl<sub>2</sub> (10 mL) with pyridine (53 μL, 0.66 mmol). Acetyl chloride (47 μL, 0.66 mmol) was added dropwise, and the solution was stirred at rt for 10 min. NaHCO<sub>3</sub> (saturated aq., 5 mL) was added, and the mixture was extracted with CH<sub>2</sub>Cl<sub>2</sub>. The combined organic extracts were washed with brine, dried over MgSO<sub>4</sub>, filtered, and concentrated. Purification by flash pressure column chromatography (3.5% Et<sub>2</sub>O/toluene) afforded separately indoline **106** as a colorless oil (115 mg, 0.28 mmol, 51%) and indoline **105** as a colorless oil (71 mg, 0.17 mmol, 32%).

N.B. Stereochemistry assigned by nOe analysis, with red arrows indicating through-space interactions.

(2*RS*,3*RS*)-1-Acetyl-2-(5-bromofuran-2-yl)-3-phenylindoline-3-carbonitrile **106**

<sup>1</sup>H NMR (500 MHz, C<sub>6</sub>D<sub>6</sub>, 348 K): δ 1.53 (3H, s), 5.27 (1H, br. s), 5.80 (1H, d, *J* = 3.4 Hz), 5.85 (1H, d, *J* = 3.4 Hz), 6.77 (1H, td, *J* = 7.6 Hz, 0.8 Hz), 6.93-7.01 (3H, m), 7.06-7.13 (2H, m), 7.18-7.23 (2H, m), 8.30 (1H, br. s).

<sup>13</sup>C NMR (125.75 MHz, C<sub>6</sub>D<sub>6</sub>, 125.75): δ 23.2, 56.9, 70.9, 111.9, 113.4, 118.0, 118.7, 123.9, 125.7, 126.2, 126.3, 129.4, 130.0, 130.1, 131.0, 140.5, 143.4, 153.2, 168.0.

HRMS (ESI<sup>+</sup>, *m/z*): [C<sub>21</sub>H<sub>16</sub><sup>79</sup>BrN<sub>2</sub>O<sub>2</sub>]<sup>+</sup> ([M+H]<sup>+</sup>) calc. 407.0390; found 407.0382. [C<sub>21</sub>H<sub>16</sub><sup>81</sup>BrN<sub>2</sub>O<sub>2</sub>]<sup>+</sup> ([M+H]<sup>+</sup>) calc. 409.0369; found 409.0361.

(2*RS*,3*SR*)-1-Acetyl-2-(5-bromofuran-2-yl)-3-phenylindoline-3-carbonitrile **105**

**<sup>1</sup>H NMR (500 MHz, C<sub>6</sub>D<sub>6</sub>, 348 K):** δ 1.63 (3H, s), 5.43 (1H, d, *J* = 3.2 Hz), 5.48 (1H, d, *J* = 3.2 Hz), 5.60 (1H, s), 6.74 (1H, td, *J* = 7.7 Hz, 0.9 Hz), 6.82 (1H, app. d, *J* = 7.7 Hz), 6.91-7.02 (3H, m), 7.10 (1H, td, *J* = 7.7 Hz, 1.2 Hz), 7.13-7.14 (2H, m), 8.35 (1H, br. s).

**<sup>13</sup>C NMR (125.75 MHz, C<sub>6</sub>D<sub>6</sub>, 125.75):** δ 23.5, 55.4, 70.1, 112.5, 112.7, 118.1, 121.0, 123.2, 125.3, 126.4, 128.9, 128.9, 129.4, 130.1, 131.2, 134.0, 144.7, 151.5, 168.2.

**HRMS (ESI<sup>+</sup>, *m/z*):** [C<sub>21</sub>H<sub>16</sub><sup>79</sup>BrN<sub>2</sub>O<sub>2</sub>]<sup>+</sup> ([M+H]<sup>+</sup>) calc. 407.0390; found 407.0382. [C<sub>21</sub>H<sub>16</sub><sup>81</sup>BrN<sub>2</sub>O<sub>2</sub>]<sup>+</sup> ([M+H]<sup>+</sup>) calc. 409.0369; found 409.0362.

(2*SR*,3*RS*/*SR*)-1-Acetyl-2-(4-bromofuran-2-yl)-3-phenylindoline-3-carbonitrile **107**

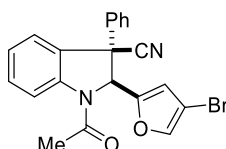

Indoline **107** was prepared according to general procedure 2, using indoline **92** (133 mg, 0.36 mmol), acetyl chloride (31 μL, 0.44 mmol), and pyridine (35 μL, 0.44 mmol) in CH<sub>2</sub>Cl<sub>2</sub> (7 mL). The reaction mixture was stirred at rt for 10 min. Purification by flash pressure column chromatography (15% EtOAc/petroleum ether) afforded indoline **107** as a yellow oil (144 mg, 0.38 mmol, 97%).

**<sup>1</sup>H NMR (500 MHz, C<sub>6</sub>D<sub>6</sub>, 348 K):** δ 1.52 (3H, s), 5.25 (1H, br. s), 6.08 (1H, s), 6.78 (1H, t, *J* = 7.6 Hz), 6.92 (1H, s), 6.94-7.02 (3H, m), 7.07-7.13 (2H, m), 7.20-7.25 (2H, m), 8.26 (1H, br. s).

**<sup>13</sup>C NMR (125.75 MHz, C<sub>6</sub>D<sub>6</sub>, 348 K):** δ 23.2, 56.7, 70.8, 101.3, 112.9, 118.0, 118.6, 125.8, 126.1, 126.3, 128.9, 129.4, 130.2, 131.0, 140.5, 142.6, 143.3, 152.2, 167.8.

**HRMS (ESI<sup>+</sup>, *m/z*):** [C<sub>21</sub>H<sub>16</sub><sup>79</sup>BrN<sub>2</sub>O<sub>2</sub>]<sup>+</sup> ([M+H]<sup>+</sup>) calc. 407.0390; found 407.0383. [C<sub>21</sub>H<sub>16</sub><sup>81</sup>BrN<sub>2</sub>O<sub>2</sub>]<sup>+</sup> ([M+H]<sup>+</sup>) calc. 409.0369; found 409.0362.

(2*RS*,3*RS*)-1-acetyl-2-(5-(benzyloxy)pyridin-3-yl)-3-phenylindoline-3-carbonitrile **108** and (2*RS*,3*SR*)-1-acetyl-2-(5-(benzyloxy)pyridin-3-yl)-3-phenylindoline-3-carbonitrile **109**

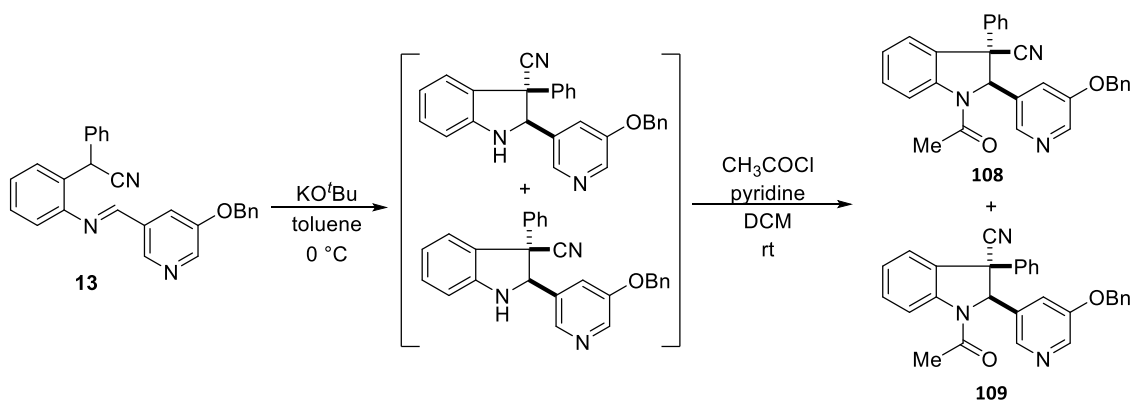

#### Racemic:

$t$ BuOK (706 mg, 6.29 mmol) was added to a solution of imine **13** (1.27 g, 3.15 mmol) in toluene (60 mL) and stirred at  $0\text{ }^\circ\text{C}$  for 25 min.  $\text{NH}_4\text{Cl}$  (saturated aq., 60 mL) was added, and the mixture was extracted 3 times with EtOAc. The combined organic extracts were washed with brine, dried over  $\text{Na}_2\text{SO}_4$ , filtered, and concentrated. Purification by flash pressure column chromatography (30% EtOAc/petroleum ether) afforded an inseparable mixture of diastereomers (853 mg, 2.11 mmol, 67%). This mixture (755 mg, 1.87 mmol) was dissolved in  $\text{CH}_2\text{Cl}_2$  (40 mL) with pyridine (212  $\mu\text{L}$ , 2.63 mmol). Acetyl chloride (181  $\mu\text{L}$ , 2.53 mmol) was added dropwise, and the solution was stirred at rt for 30 min.  $\text{NaHCO}_3$  (saturated aq., 40 mL) was added, and the mixture was extracted with  $\text{CH}_2\text{Cl}_2$ . The combined organic extracts were washed with brine, dried over  $\text{MgSO}_4$ , filtered, and concentrated. Purification by flash pressure column chromatography (15% EtOAc/petroleum ether) afforded separately diastereomers **108** as a colorless solid (376 mg, 0.84 mmol, 45%) and **109** as a colorless solid (167 mg, 0.38 mmol, 20%).

#### Asymmetric:

Indolines **(R,R)-108** and **(S,S)-108** were prepared according to general procedure 2 using indoline **(R,R)-15** (157 mg, 0.39 mmol), acetyl chloride (33  $\mu\text{L}$ , 0.47 mmol), and pyridine (38  $\mu\text{L}$ , 0.47 mmol) in  $\text{CH}_2\text{Cl}_2$  (8.5 mL) and indoline **(S,S)-15** (216 mg, 0.54 mmol), acetyl chloride (46  $\mu\text{L}$ , 0.64 mmol), and pyridine (52  $\mu\text{L}$ , 0.64 mmol) in  $\text{CH}_2\text{Cl}_2$  (10 mL). Purification by flash pressure column chromatography (50% EtOAc/petroleum ether) afforded indolines **(R,R)-108** (165 mg, 0.37 mmol, 95%) and **(S,S)-108** (230 mg, 0.52 mmol, 96%) respectively.

(2*RS*,3*RS*)-1-Acetyl-2-(5-(benzyloxy)pyridin-3-yl)-3-phenylindoline-3-carbonitrile **108**

**<sup>1</sup>H (500 MHz, C<sub>6</sub>D<sub>6</sub>, 348 K):** δ 8.45 (1H, s), 8.33 (1H, br. s), 8.26 (1H, s), 7.22 (2H, app. d, *J* = 7.6 Hz), 6.97-7.13 (11H, m), 6.77 (1H, t, *J* = 7.6 Hz), 5.20 (1H, br. s), 4.50-4.61 (2H, d, *J* = 12.5 Hz), 1.48 (3H, s).

**<sup>13</sup>C (126 MHz, C<sub>6</sub>D<sub>6</sub>, 348 K):** δ 168.2, 156.1, 144.0, 141.7, 141.3, 140.9, 136.8, 134.8, 131.2, 130.2, 129.9, 129.4, 129.1, 126.4, 126.3, 125.9, 119.7, 119.0, 117.7, 74.7, 71.2, 58.3, 23.7. ‡

‡ 2 peaks obscured.

**HRMS (ES<sup>+</sup>):** [C<sub>29</sub>H<sub>24</sub>N<sub>3</sub>O<sub>2</sub>]<sup>+</sup> ([M+H]<sup>+</sup>) calc. 446.1863; found 446.1854.

**MP:** 61-64 °C.

[α]<sub>D</sub><sup>25.0</sup> (*R,R*) = +76 (*c* = 0.1, CHCl<sub>3</sub>); [α]<sub>D</sub><sup>25.0</sup> (*S,S*) = -84 (*c* = 0.1, CHCl<sub>3</sub>).

(2*RS*,3*SR*)-1-Acetyl-2-(5-(benzyloxy)pyridin-3-yl)-3-phenylindoline-3-carbonitrile **109**

**<sup>1</sup>H (500 MHz, C<sub>6</sub>D<sub>6</sub>):** δ 8.61 (1H, br. s), 8.45 (1H, d, *J* = 2.7 Hz), 8.28 (1H, app. s), 7.19-7.24 (2H, m), 6.87-7.12 (11H, m), 6.70 (1H, td, *J* = 7.6 Hz, 1.0 Hz), 5.09 (1H, br. s), 4.42 (1H, d, *J* = 11.7 Hz), 4.38 (1H, d, *J* = 11.7 Hz), 1.36 (3H, br. s).

**<sup>13</sup>C (126 MHz, C<sub>6</sub>D<sub>6</sub>):** δ 168.0, 155.5, 143.5, 141.1, 140.7, 140.0, 136.1, 134.4, 130.9, 129.8, 129.0, 128.7, 127.9, 126.0, 125.9, 125.7, 118.8, 118.7, 117.3, 73.9, 70.3, 57.8, 23.3. ‡

‡ 2 peaks obscured.

**HRMS (ES<sup>+</sup>):** [C<sub>29</sub>H<sub>24</sub>N<sub>3</sub>O<sub>2</sub>]<sup>+</sup> ([M+H]<sup>+</sup>) calc. 446.1863; found 446.1860.

**MP:** 63-68 °C.

(2*RS*,3*SR*)-1-acetyl-2-(5-hydroxypyridin-3-yl)-3-phenylindoline-3-carbonitrile **110**

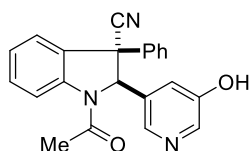

Indoline **110** was prepared according to general procedure 8, using indoline **109** (150 mg, 0.34 mmol) and Pd/C (wet degussa type, 15 mg). The reaction mixture was stirred under a H<sub>2</sub> atmosphere for 5.5 h. The crude residue was triturated with toluene to afford indoline **110** as a colorless solid (75 mg, 0.21 mmol, 63%).

<sup>1</sup>H NMR (500 MHz, CD<sub>3</sub>OD): δ 8.28 (1H, br. s), 7.77 (1H, d, *J* = 2.4 Hz), 7.59 (1H, td, *J* = 7.8 Hz, 1.1 Hz), 7.38 (1H, d, *J* = 1.3 Hz), 7.31 (1H, td, *J* = 7.8 Hz, 1.1 Hz), 7.19-7.28 (4H, m), 7.15 (2H, m), 6.61 (1H, app. t, *J* = 1.9 Hz), 6.30 (1H, s), 2.16 (3H, br. s).<sup>†</sup>

<sup>13</sup>C NMR (126 MHz, CD<sub>3</sub>OD): δ 171.5, 155.7, 145.3, 140.0, 138.5, 134.5, 133.7, 132.4, 130.4, 129.8, 129.8, 127.6, 127.0, 122.5, 122.3, 118.8, 72.9, 56.6, 24.2.<sup>‡</sup>

<sup>†</sup> OH peak not observed due to exchange with MeOD.

<sup>‡</sup> 1 peak obscured.

HRMS (ES<sup>+</sup>): [C<sub>22</sub>H<sub>18</sub>N<sub>3</sub>O<sub>2</sub>]<sup>+</sup> ([M+H]<sup>+</sup>) calc. 356.1394; found 356.1390.

MP: 132-136 °C.

(2*RS*,3*RS*)-1-acetyl-2-(5-hydroxypyridin-3-yl)-3-phenylindoline-3-carbonitrile **17**

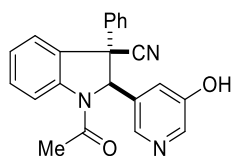

Indoline **17** was prepared according to general procedure 8, using indoline **108** (390 mg, 0.88 mmol) and Pd/C (wet degussa type, 36 mg). The reaction mixture was stirred under a H<sub>2</sub> atmosphere for 5 h. The crude residue was triturated with toluene to afford indoline **17** as a colorless solid (308 mg, 0.87 mmol, 98%). The non-racemic forms of indoline **17** were prepared from (*R,R*)-**108** and (*S,S*)-**108**, following an identical protocol.

<sup>1</sup>H NMR (500 MHz, CD<sub>3</sub>OD): δ 8.33 (1H, br. s), 8.15 (1H, br. s), 8.06 (1H, br. s), 7.57 (1H, t, *J* = 7.7 Hz), 7.36-7.46 (4H, m), 7.32 (1H, t, *J* = 7.7 Hz), 7.28 (2H, m), 7.05 (1H, t, *J* = 2.0 Hz), 5.75 (1H, s), 1.99 (3H, br. s).<sup>†</sup>

$^{13}\text{C}$  NMR (126 MHz,  $\text{CD}_3\text{OD}$ ):  $\delta$  171.2, 156.3, 144.2, 141.0, 140.0, 139.6, 136.6, 132.2, 130.9, 130.4, 127.2, 127.2, 126.9, 121.7, 119.8, 118.5, 74.1, 58.8, 24.0.<sup>‡</sup>

† OH peak not observed.

‡ 1 peak obscured.

HRMS ( $\text{ES}^+$ ):  $[\text{C}_{22}\text{H}_{18}\text{N}_3\text{O}_2]^+$  ( $[\text{M}+\text{H}]^+$ ) calc. 356.1394; found 356.1389.

MP: 120-125 °C.

$[\alpha]_D^{25.0}$  (*R,R*) = +72 ( $c = 0.1$ ,  $\text{CHCl}_3$ );  $[\alpha]_D^{25.0}$  (*S,S*) = -73 ( $c = 0.1$ ,  $\text{CHCl}_3$ ).

5-((2*R*,3*R*)-1-Acetyl-3-cyano-3-phenylindolin-2-yl)pyridin-3-yl trifluoromethanesulfonate (***R,R***-111) and 5-((2*S*,3*S*)-1-acetyl-3-cyano-3-phenylindolin-2-yl)pyridin-3-yl trifluoromethanesulfonate (***S,S***-111)

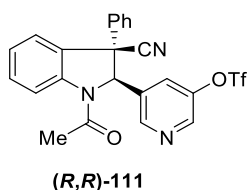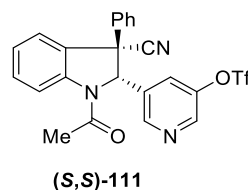

5-((2*R*,3*R*)-1-Acetyl-3-cyano-3-phenylindolin-2-yl)pyridin-3-yl trifluoromethanesulfonate (***R,R***-111)

Diisopropylethylamine (49  $\mu\text{L}$ , 0.28 mmol) was added to a solution of indoline (***R,R***-17) (50 mg, 0.14 mmol) and *N*-phenyl-bis(trifluoromethylsulfonimide) (100 mg, 0.28 mmol) in  $\text{CH}_2\text{Cl}_2$  (4 mL) at 0 °C. The reaction mixture was allowed to warm to rt and stirred for 3 h.  $\text{H}_2\text{O}$  (10 mL) was added, and the mixture was extracted with  $\text{CH}_2\text{Cl}_2$ . The combined organic extracts were washed with brine, dried over  $\text{Na}_2\text{SO}_4$ , filtered, and concentrated. Purification by flash pressure column chromatography (30% EtOAc/petroleum ether) afforded indoline (***R,R***-111) as a colorless solid (53 mg, 0.11 mmol, 79%).

5-((2*S*,3*S*)-1-Acetyl-3-cyano-3-phenylindolin-2-yl)pyridin-3-yl trifluoromethanesulfonate (***S,S***-111)

Indoline (***S,S***-111) was prepared in an analogous manner to indoline (***R,R***-111), using indoline (***S,S***-17) (148 mg, 0.42 mmol), diisopropylethylamine (0.15 mL, 0.83 mmol), and *N*-phenyl-bis(trifluoromethylsulfonimide) (298 mg, 0.83 mmol) in  $\text{CH}_2\text{Cl}_2$  (12 mL). The reaction mixture was stirred at rt for 3 h. Purification by flash



pressure column chromatography (30% EtOAc/petroleum ether) afforded indoline(**S,S**)-**111** as a colorless solid (189 mg, 0.39 mmol, 93%).

$^1\text{H}$  (500 MHz,  $\text{C}_6\text{D}_6$ , 348 K):  $\delta$  8.44 (1H, app. s), 8.34 (1H, d,  $J = 2.1$  Hz), 7.96 (1H, br. s), 7.24 (1H, app. s), 7.11-7.21 (2H, obscured), 7.06 (1H, t,  $J = 7.9$  Hz), 6.94-7.03 (4H, m), 6.74 (1H, t,  $J = 7.6$  Hz), 5.23 (1H, s), 1.50 (3H, s).

$^{13}\text{C}$  (126 MHz,  $\text{C}_6\text{D}_6$ , 348 K):  $\delta$  167.7, 148.4, 147.4, 144.2, 143.2, 140.4, 136.2, 131.4, 130.3, 129.7, 129.6, 127.1, 126.6, 126.2, 126.2, 118.6, 117.2, 73.6, 57.7, 23.5.<sup>†</sup>

<sup>†</sup>  $\text{CF}_3$  signal obscured due to insufficient signal-to-noise ratio.

$^{19}\text{F}$  (377 MHz,  $\text{C}_6\text{D}_6$ ):  $\delta$  -72.7.

HRMS ( $\text{ES}^+$ ):  $[\text{C}_{23}\text{H}_{17}\text{O}_4\text{N}_3\text{F}_3^{32}\text{S}]^+$  ( $[\text{M}+\text{H}]^+$ ) requires 488.0886; found 488.0887.

$[\alpha]_D^{25.0}$  (*R,R*) = +51 ( $c = 0.1$ ,  $\text{CHCl}_3$ ),  $[\alpha]_D^{25.0}$  (*S,S*) = -60 ( $c = 0.1$ ,  $\text{CHCl}_3$ ).

(2*RS*,3*SR*)-1-acetyl-2-(5-bromopyridin-3-yl)-3-phenyl-2,3-dihydro-1H-pyrrolo[3,2-*b*]pyridine-3-carbonitrile **112**

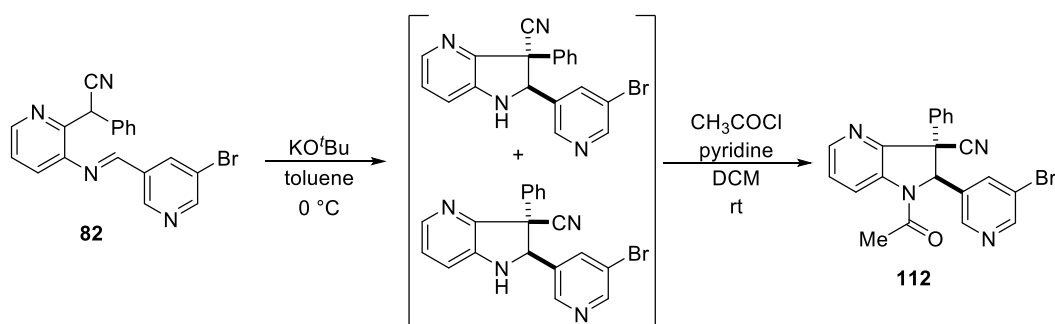

$\text{KO}^t\text{Bu}$  (65 mg, 0.58 mmol) was added to a solution of imine **82** (200 mg, 0.53 mmol) in toluene and stirred at  $0\text{ }^\circ\text{C}$  for 20 min.  $\text{NH}_4\text{Cl}$  (saturated aq., 20 mL) was added, and the mixture was extracted with EtOAc. The combined organic extracts were washed with brine, dried over  $\text{Na}_2\text{SO}_4$ , filtered, and concentrated. Purification by flash pressure column chromatography (50% EtOAc/petroleum ether) afforded a 1:1.23 inseparable mixture of diastereoisomers (87 mg, 0.23 mmol, 44%). 60 mg (0.16 mmol) of the residue was dissolved in  $\text{CH}_2\text{Cl}_2$  (6 mL). Pyridine (19  $\mu\text{L}$ , 0.24 mmol) was added, followed by acetyl chloride (17  $\mu\text{L}$ , 0.24 mmol). The mixture was stirred at  $\text{rt}$  for 2 h.  $\text{NaHCO}_3$  (saturated aq., 6 mL) was added, and the mixture was extracted with  $\text{CH}_2\text{Cl}_2$ . The combined organic extracts were washed with brine, dried over  $\text{Na}_2\text{SO}_4$ , filtered and concentrated. Purification by flash pressure column chromatography afforded indoline **112** as a colorless solid (38 mg, 0.09 mmol, 57%).

N.B. Stereochemistry assigned by analogy to indolines **93** and **94**.

**<sup>1</sup>H NMR (500 MHz, C<sub>6</sub>D<sub>6</sub>, 348 K):** δ 1.41 (3H, s), 5.17 (1H, s), 6.63 (1H, dd, *J* = 8.2 Hz, 4.7 Hz), 6.93-7.03 (3H, m), 7.23 (2H, app. d, *J* = 8.0 Hz), 7.48 (1H, t, *J* = 1.9 Hz), 7.98 (1H, dd, *J* = 4.7 Hz, 1.3 Hz), 8.19 (1H, br. s), 8.33 (1H, d, *J* = 1.9 Hz), 8.57 (1H, d, *J* = 1.9 Hz).

**<sup>13</sup>C NMR (125.75 MHz, C<sub>6</sub>D<sub>6</sub>, 348 K):** δ 23.2, 59.4, 72.3, 117.5, 121.9, 124.3, 125.0, 126.2, 129.5, 130.3, 135.5, 136.7, 137.5, 139.8, 146.9, 147.4, 149.8, 153.1, 168.6.

**HRMS (ES<sup>+</sup>):** [C<sub>21</sub>H<sub>16</sub><sup>79</sup>BrN<sub>4</sub>O]<sup>+</sup> ([M+H]<sup>+</sup>) calc. 419.0502; found 419.0504. [C<sub>21</sub>H<sub>16</sub><sup>81</sup>BrN<sub>4</sub>O]<sup>+</sup> ([M+H]<sup>+</sup>) calc. 421.0482; found 421.0482.

(2*RS*,3*RS*)-2-(5-bromopyridin-3-yl)-1-(2-cyanoacetyl)-3-phenylindoline-3-carbonitrile **113**

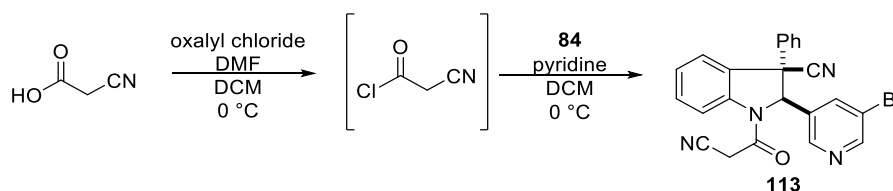

1 drop of DMF was added to a solution of cyanoacetic acid (200 mg, 2.35 mmol) in CH<sub>2</sub>Cl<sub>2</sub> (8 mL), and the mixture was cooled to 0 °C. Oxalyl chloride (0.18 mL, 2.1 mmol) was added dropwise and the mixture was stirred at 0 °C for 1 h. 4 mL of the reaction mixture was transferred to a solution of indoline **84** (60 mg, 0.16 mmol) in CH<sub>2</sub>Cl<sub>2</sub> (4 mL) at 0 °C, and the mixture was stirred at 0 °C for 25 min. NaHCO<sub>3</sub> (sat aq., 10 mL) was added, and the mixture was extracted with DCM. The combined organic extracts were washed with brine, dried over Na<sub>2</sub>SO<sub>4</sub>, filtered, and concentrated. Purification by flash pressure column chromatography (30% EtOAc/Petroleum ether) afforded indoline **113** as a colorless oil (56 mg, 0.13 mmol, 79%).

**<sup>1</sup>H NMR (500 MHz, C<sub>6</sub>D<sub>6</sub>, 348 K):** δ 2.24 (1H, d, *J* = 18.5 Hz), 2.30 (1H, d, *J* = 18.5 Hz), 5.01 (1H, s), 6.70 (1H, t, *J* = 7.6 Hz), 6.93 (1H, d, *J* = 7.5 Hz), 6.95-7.04 (4H, m), 7.08 (2H, m), 7.42 (1H, app. s), 7.84 (1H, br. s), 8.28 (1H, d, *J* = 1.6 Hz), 8.55 (1H, d, *J* = 1.9 Hz).

**<sup>13</sup>C NMR (125.75 MHz, C<sub>6</sub>D<sub>6</sub>, 348 K):** δ 26.6, 58.2, 73.6, 112.5, 117.5, 118.4, 122.0, 126.1, 126.7, 127.3, 129.9, 130.4, 131.5, 134.5, 136.6, 139.9, 142.2, 146.7, 153.5, 160.0.<sup>†</sup>

<sup>†</sup> 1 peak obscured.

**HRMS (ES<sup>+</sup>):** [C<sub>23</sub>H<sub>16</sub><sup>79</sup>BrN<sub>4</sub>O]<sup>+</sup> ([M+H]<sup>+</sup>) calc. 443.0502; found 443.0502. [C<sub>23</sub>H<sub>16</sub><sup>81</sup>BrN<sub>4</sub>O]<sup>+</sup> ([M+H]<sup>+</sup>) calc. 445.0482; found 445.0480.

**MP:** 93-95 °C.

2-(1,3-Dioxoisindolin-2-yl)acetyl chloride **114**

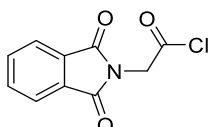

Acyl chloride **114** was prepared according to a literature procedure.<sup>11</sup> DMF (1 drop) was added to a suspension of *N*-phthaloylglycine (1.00 g, 4.87 mmol) in CH<sub>2</sub>Cl<sub>2</sub> (35 mL) and cooled to 0 °C. Oxalyl chloride (0.82 mL, 9.8 mmol) was added dropwise, and the mixture was stirred at 0 °C for 1.5 h. The reaction mixture was concentrated at rt to afford acyl chloride **114** as a yellow solid (1.12 g, 5.01 mmol, quant). The spectral data matched those reported in the literature.

<sup>1</sup>H NMR (400 MHz, CDCl<sub>3</sub>): δ 4.79 (2H, s), 7.75 (2H, m), 7.88 (2H, m).

<sup>13</sup>C NMR (100.6 MHz, CDCl<sub>3</sub>): δ 47.7, 124.1, 131.7, 134.8, 166.7, 169.2.

(2*RS*,3*RS*)-2-(5-Bromopyridin-3-yl)-1-(2-(1,3-dioxoisindolin-2-yl)acetyl)-3-phenylindoline-3-carbonitrile **115**

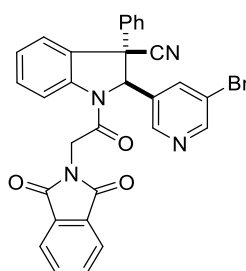

Indoline **115** was prepared according to general procedure 2, using indoline **84** (80 mg, 0.21 mmol), acyl chloride **114** (119 mg, 0.53 mmol), and pyridine (43 μL, 0.53 mmol) in CH<sub>2</sub>Cl<sub>2</sub> (6.5 mL). The reaction mixture was stirred at rt for 1 h. Purification by flash pressure column chromatography (30-35% EtOAc/petroleum ether) afforded indoline **115** as a colorless solid (75 mg, 0.13 mmol, 63%).

**<sup>1</sup>H NMR (400 MHz, dmsO-D<sub>6</sub>):** δ 4.14 (1H, d, *J* = 17.2 Hz), 4.92 (1H, d, *J* = 17.2 Hz), 6.22 (1H, s), 7.32-7.42 (3H, m), 7.43-7.50 (2H, m), 7.50-7.57 (2H, m), 7.60 (1H, t, *J* = 7.8 Hz), 7.82-7.93 (4H, m), 8.00 (1H, app. s), 8.11 (1H, d, *J* = 7.8 Hz), 8.57 (1H, d, *J* = 1.6 Hz), 8.79 (1H, d, *J* = 1.9 Hz).

**<sup>13</sup>C NMR (100.6 MHz, dmsO-D<sub>6</sub>):** δ 56.4, 69.5, 116.4, 117.8, 119.8, 122.8, 125.1, 125.3, 125.8, 127.7, 128.4, 128.6, 129.1, 130.6, 131.1, 134.2, 134.4, 136.4, 138.1, 140.9, 145.8, 150.9, 164.3, 166.5.

**HRMS (ES<sup>+</sup>):** [C<sub>30</sub>H<sub>20</sub>O<sub>3</sub>N<sub>4</sub><sup>79</sup>Br]<sup>+</sup> ([M+H]<sup>+</sup>) requires 563.0713; found 563.0714. [C<sub>30</sub>H<sub>20</sub>O<sub>3</sub>N<sub>4</sub><sup>81</sup>Br]<sup>+</sup> ([M+H]<sup>+</sup>) requires 565.0693; found 565.0692.

**MP:** 250-252 °C.

(2*RS*,3*RS*)-2-(5-Bromopyridin-3-yl)-1-(3-(3-methyl-3H-diazirin-3-yl)propanoyl)-3-phenylindoline-3-carbonitrile

**116**

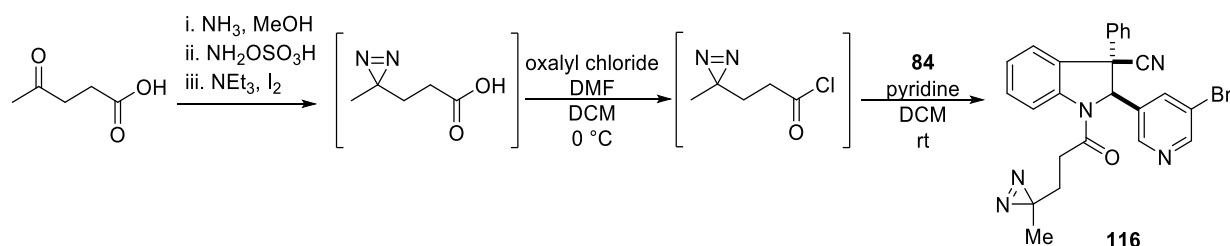

Diazirine **116** was prepared according to a modified literature procedure.<sup>12</sup> A solution of NH<sub>3</sub> in MeOH (7 N, 5.0 mL, 35 mmol) was added dropwise to a solution of levulinic acid (0.44 mL, 4.3 mmol) in MeOH (1 mL) at 0 °C and stirred for 3 h. A solution of hydroxylamine *O*-sulfonic acid (510 mg, 4.95 mmol) in MeOH (1.5 mL) was added and stirred at rt for 16 h. The excess NH<sub>3</sub> was removed by blowing the mixture down with N<sub>2</sub>. The white precipitate was filtered off and the filtrate concentrated. The remaining residue was dissolved in MeOH (0.5 mL) and cooled to 0 °C. NEt<sub>3</sub> (0.90 mL, 6.5 mmol) was added and stirred at 0 °C for 5 min. I<sub>2</sub> was added portionwise until the yellow colour of the solution remained (app.rox. 1 g). The solution was diluted with EtOAc, washed with HCl (aq., 1 M), Na<sub>2</sub>S<sub>2</sub>O<sub>3</sub> (aq., 10% w/w), and brine. The organic layer was dried over Na<sub>2</sub>SO<sub>4</sub>, filtered, and concentrated.

The crude residue (210 mg) was dissolved in CH<sub>2</sub>Cl<sub>2</sub> (12 mL) and 1 drop DMF was added. The solution was cooled to 0 °C, and oxalyl chloride (0.30 mL, 3.3 mmol) was added dropwise. The reaction mixture was stirred at 0 °C for 1.5 h and concentrated.

The crude residue (78 mg) was dissolved in CH<sub>2</sub>Cl<sub>2</sub> (1.5 mL) and added dropwise to a solution of indoline **84** (50 mg, 0.13 mmol) and pyridine (43 μL, 0.53 mmol) in CH<sub>2</sub>Cl<sub>2</sub> (2 mL) and stirred at rt for 30 min. NaHCO<sub>3</sub> (saturated aq., 5 mL) was added, and the mixture was extracted with CH<sub>2</sub>Cl<sub>2</sub>. The combined organic extracts were washed with brine, dried over Na<sub>2</sub>SO<sub>4</sub>, filtered, and concentrated. Purification by flash pressure column chromatography (25% EtOAc/petroleum ether) afforded indoline **116** as a colourless gum (40 mg, 0.082 mmol, 62%).

<sup>1</sup>H NMR (500 MHz, C<sub>6</sub>D<sub>6</sub>, 348 K): δ 0.56 (3H, s), 1.42 (2H, t, *J* = 6.7 Hz), 1.57 (2H, app. m), 5.25 (1H, s), 6.73 (1H, td, *J* = 7.6 Hz, 0.8 Hz), 6.94-7.10 (5H, m), 7.20 (2H, m), 7.56 (1H, t, *J* = 2.1 Hz), 8.06 (1H, br. s), 8.42 (1H, d, *J* = 1.9 Hz), 8.56 (1H, d, *J* = 2.1 Hz).

<sup>13</sup>C NMR (126 MHz, C<sub>6</sub>D<sub>6</sub>, 348 K): δ 19.7, 24.7, 29.0, 29.7, 57.5, 73.2, 117.2, 118.3, 121.4, 125.8, 125.9, 126.1, 129.1, 129.8, 130.9, 135.4, 136.4, 140.3, 142.7, 146.6, 152.6, 169.0.<sup>†</sup>

<sup>†</sup> 1 peak obscured.

HRMS (ES<sup>+</sup>): [C<sub>25</sub>H<sub>21</sub>ON<sub>5</sub><sup>79</sup>Br]<sup>+</sup> ([M+H]<sup>+</sup>) requires 486.0924; found 486.0924. [C<sub>25</sub>H<sub>21</sub>ON<sub>5</sub><sup>81</sup>Br]<sup>+</sup> ([M+H]<sup>+</sup>) requires 488.0904; found 488.0902.

#### 1-(5'-Azidopentyl)pyrrolidine **118**

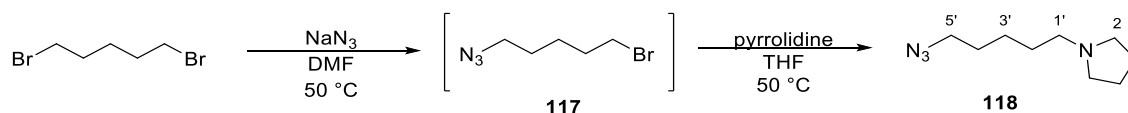

Azide **118** was prepared according to a literature procedure.<sup>13</sup> NaN<sub>3</sub> (286 mg, 4.42 mmol) was added to a solution of 1,5-dibromopentane (1.2 mL, 8.8 mL) in DMF (30 mL) and stirred at 50 °C for 3 h. The mixture was allowed to cool to rt, diluted with EtOAc, and washed with H<sub>2</sub>O, then brine. The organic layer was dried over Na<sub>2</sub>SO<sub>4</sub>, filtered, and concentrated. Purification by flash pressure column chromatography (3.5% Et<sub>2</sub>O/hexane) afforded **117** as a colorless liquid (557 mg, 2.90 mmol, 66%). Azide **117** was not fully characterized due to concerns about its toxicity and stability.

A solution of azide **117** (200 mg, 1.04 mmol) in dry THF (2 mL) was added dropwise to a solution of pyrrolidine (0.96 mL, 12 mmol) in dry THF (3 mL) and stirred at 50 °C for 1 h. Water (5 mL) was added, and the mixture was extracted with Et<sub>2</sub>O. The combined organic extracts were washed with brine, dried over MgSO<sub>4</sub>, filtered, and

concentrated to afford azide **118** as a yellow liquid (171 mg, 0.94 mmol, 90%).

$^1\text{H NMR}$  (400 MHz,  $\text{CDCl}_3$ ):  $\delta$  1.41 (2H, m), 1.49-1.68 (4H, m), 1.81 (4H, m), 2.37-2.55 (6H, m), 3.27 (2H, t,  $J = 7.0$  Hz).

$^{13}\text{C NMR}$  (100.6 MHz,  $\text{CDCl}_3$ ):  $\delta$  23.5, 24.9, 28.5, 28.9, 51.5, 54.3, 56.4.

**HRMS** ( $\text{ES}^+$ ):  $[\text{C}_9\text{H}_{19}\text{N}_4]^+$  ( $[\text{M}+\text{H}]^+$ ) requires 183.1604; found 183.1605.

(2*RS*,3*SR*)-1-Acetyl-3-phenyl-2-(5-(1-(5-(pyrrolidin-1-yl)pentyl)-1*H*-1,2,3-triazol-4-yl)pyridin-3-yl)indoline-3-carbonitrile **119**

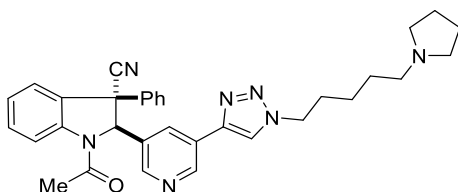

Indoline **119** was prepared according to a modified literature procedure.<sup>14</sup>  $\text{CuSO}_4$  (aq., 2.5 mM, 0.55 mL, 0.0014 mmol) and sodium-L-ascorbate (aq., 12.5 mM, 0.55 mL, 0.0069 mmol) were added to a solution of alkyne **97** (25 mg, 0.070 mmol) and azide **118** (15 mg, 0.083 mmol) in  $t\text{BuOH}$  (1.1 mL). The mixture was stirred at rt for 16 h.  $\text{H}_2\text{O}$  (4 mL) was added, and the mixture was extracted with EtOAc. The combined organic extracts were washed with brine, dried over  $\text{Na}_2\text{SO}_4$ , filtered, and concentrated. Purification by preparatory TLC (6%  $\text{MeOH}/\text{CH}_2\text{Cl}_2 + 0.5\%$  aq.  $\text{NH}_4\text{OH}$ ) afforded indoline **119** as a colorless solid (9.3 mg, 0.017 mmol, 26%).

$^1\text{H NMR}$  (500 MHz,  $\text{C}_6\text{D}_6$ , 348 K):  $\delta$  1.10 (2H, quin,  $J = 7.2$  Hz), 1.31 (2H, quin,  $J = 7.2$  Hz), 1.47 (2H, quin,  $J = 7.2$  Hz), 1.61 (4H, m), 1.70 (3H, s), 2.26 (2H, t,  $J = 7.0$  Hz), 2.36 (4H, m), 3.69 (2H, t,  $J = 7.1$  Hz), 5.82 (1H, s), 6.72-6.82 (5H, m), 6.84 (1H, dd,  $J = 7.7$  Hz, 0.9 Hz), 7.04-7.09 (2H, m), 7.12 (1H, td,  $J = 7.8$  Hz, 1.4 Hz), 7.65 (1H, t,  $J = 2.0$  Hz), 8.04 (1H, app. s), 8.32 (1H, br. s), 8.75 (1H, d,  $J = 2.0$  Hz).

$^{13}\text{C NMR}$  (125.75 MHz,  $\text{C}_6\text{D}_6$ , 348 K):  $\delta$  24.1, 24.4, 24.9, 28.9, 30.5, 50.4, 54.6, 56.1, 56.3, 73.7, 117.9, 120.0, 121.7, 125.6, 126.7, 127.6, 128.9, 129.1, 129.3, 129.3, 131.5, 131.7, 132.9, 134.2, 144.2, 145.1, 147.6, 148.4, 168.5.

**HRMS** ( $\text{ESI}^+$ ,  $m/z$ ):  $[\text{C}_{33}\text{H}_{36}\text{N}_7\text{O}]^+$  ( $[\text{M}+\text{H}]^+$ ) calc. 546.2976; found 546.2983.

**MP**: 116-123  $^\circ\text{C}$ .

(2*RS*,3*RS*)-1-Acetyl-3-phenyl-2-(5-(1-(5-(pyrrolidin-1-yl)pentyl)-1*H*-1,2,3-triazol-4-yl)pyridin-3-yl)indoline-3-carbonitrile **2**

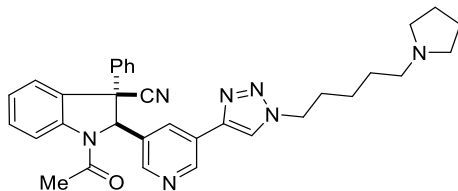

Indoline **2** was prepared according to a modified literature procedure.<sup>14</sup> CuSO<sub>4</sub> (aq., 10 mM, 0.33 mL, 0.0033 mmol) and sodium-L-ascorbate (aq., 50 mM, 0.13 mL, 0.0065 mmol) were added to a solution of alkyne **98** (24 mg, 0.070 mmol) and azide **118** (12 mg, 0.066 mmol) in 3:1 <sup>t</sup>BuOH/H<sub>2</sub>O (1 mL). The mixture was stirred at rt for 16 h. H<sub>2</sub>O (4 mL) was added, and the mixture was extracted with EtOAc. The combined organic extracts were washed with brine, dried over Na<sub>2</sub>SO<sub>4</sub>, filtered, and concentrated. Purification by preparatory TLC (6% MeOH/CH<sub>2</sub>Cl<sub>2</sub> + 0.5% aq. NH<sub>4</sub>OH) afforded indoline **2** as a colorless solid (9.5 mg, 0.017 mmol, 26%).

<sup>1</sup>H NMR (500 MHz, C<sub>6</sub>D<sub>6</sub>, 348 K): δ 1.13 (2H, quin, *J* = 7.3 Hz), 1.33 (2H, quin, *J* = 7.3 Hz), 1.50 (2H, quin, *J* = 7.5 Hz), 1.55 (3H, s), 1.62 (4H, m), 2.27 (2H, t, *J* = 7.3 Hz), 2.37 (4H, m), 3.72 (2H, t, *J* = 7.3 Hz), 5.35 (1H, s), 6.76 (1H, t, *J* = 7.5 Hz), 6.88 (1H, s), 6.95-7.05 (3H, m), 7.08 (1H, d, *J* = 7.5 Hz), 7.11 (1H, t, *J* = 7.6 Hz), 7.25 (2H, m), 8.32 (1H, br. s), 8.36 (1H, t, *J* = 2.0 Hz), 8.61 (1H, d, *J* = 2.0 Hz), 9.06 (1H, d, *J* = 2.0 Hz).

<sup>13</sup>C NMR (125.75 MHz, C<sub>6</sub>D<sub>6</sub>, 348 K): δ 23.7, 24.4, 25.0, 28.9, 30.5, 50.5, 54.6, 56.3, 58.3, 75.0, 117.8, 119.2, 120.4, 125.9, 126.3, 126.4, 129.3, 129.8, 130.2, 131.2, 131.3, 134.7, 141.2, 144.0, 144.4, 148.0, 149.1, 168.2.<sup>†</sup>

<sup>†</sup> 1 peak obscured.

HRMS (ES<sup>+</sup>): [C<sub>33</sub>H<sub>36</sub>N<sub>7</sub>O]<sup>+</sup> ([M+H]<sup>+</sup>) calc. 546.2976; found 546.2980.

MP: 109-114 °C.

(*E*)-7-(Tributylstannyl)hept-6-en-1-ol **120**

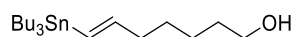

Vinylstannane **120** was prepared according to a literature procedure.<sup>15</sup> Pd<sub>2</sub>dba<sub>3</sub> (16.3 mg, 0.018 mmol), cyc<sub>3</sub>PHBF<sub>4</sub> (26 mg, 0.071 mmol), and DIPEA (25 μL, 0.14 mmol) were added to a solution of CH<sub>2</sub>Cl<sub>2</sub> (15 mL) and stirred at rt for 10 min. 6-Heptyn-1-ol (400 mg, 3.57 mmol) was added, and the mixture was cooled to 0 °C. A solution of Bu<sub>3</sub>SnH (1.15 mL, 4.28 mmol) in CH<sub>2</sub>Cl<sub>2</sub> (5 mL) was added dropwise over 5 min and stirred at 0 °C for 2.5 h. The mixture was concentrated and the residue purified by flash pressure column chromatography (10% EtOAc/petroleum ether) to afford vinyl stannane **120** as a colorless liquid (1.20 g, 2.98 mmol, 84%).

<sup>1</sup>H NMR (400 MHz, CDCl<sub>3</sub>): δ 0.74-0.98 (15H, m), 1.28-1.63 (19H, m), 2.15 (2H, m), 3.65 (2H, td, *J* = 6.6 Hz, 5.4 Hz), 5.86 (1H, app. d, *J* = 19.0 Hz), 5.93 (1H, app. dt, *J* = 19.0 Hz, 5.6 Hz).

<sup>13</sup>C NMR (100.6 MHz, CDCl<sub>3</sub>): δ 9.4, 13.7, 25.2, 27.3, 28.7, 29.1, 32.7, 37.8, 63.0, 127.3, 149.4.

(*E*)-1-(7-(Tributylstannyl)hept-6-en-1-yl)pyrrolidine **122**

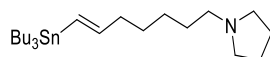

PPh<sub>3</sub> (972 mg, 3.71 mmol) was added portionwise to a solution of vinyl stannane **120** (1.15 g, 2.85 mmol) and CBr<sub>4</sub> (1.23 g, 3.71 mmol) in CH<sub>2</sub>Cl<sub>2</sub> (20 mL), and the mixture was stirred at 0 °C for 1 h. Ice-cooled pentane (50 mL) was added. The white precipitate was removed by filtration, and the filtrate was concentrated. The resulting residue was dissolved in THF (10 mL) and added to a solution of pyrrolidine (1.20 mL, 13.9 mmol) in THF (10 mL). The mixture was stirred at 50 °C for 4 h. H<sub>2</sub>O (20 mL) was added and the mixture was extracted with EtOAc. The combined organic extracts were washed with brine, dried over Na<sub>2</sub>SO<sub>4</sub>, filtered, and concentrated. Purification by flash pressure column chromatography (5% MeOH/CH<sub>2</sub>Cl<sub>2</sub> + 0.5% aq. NH<sub>4</sub>OH) afforded vinyl stannane **122** as a yellow oil (413 mg, 0.90 mmol, 32%).

<sup>1</sup>H NMR (400 MHz, CDCl<sub>3</sub>): δ 0.82-0.93 (15H, m), 1.23-1.37 (8H, m), 1.39-1.55 (10H, m), 1.78 (4H, m), 2.14 (2H, app. q, *J* = 6.7 Hz), 2.42 (2H, m), 2.49 (4H, m), 5.86 (1H, app. d, *J* = 18.9 Hz), 5.96 (1H, app. dt, *J* = 18.9 Hz, 5.8 Hz).

<sup>13</sup>C NMR (100.6 MHz, CDCl<sub>3</sub>): δ 9.4, 13.7, 23.4, 27.2, 27.3, 28.9, 29.0, 29.1, 37.8, 54.2, 56.7, 127.1, 149.6.

HRMS (ES<sup>+</sup>): [C<sub>23</sub>H<sub>48</sub>N<sup>120</sup>Sn]<sup>+</sup> ([M+H]<sup>+</sup>) requires 458.2807; found 458.2809.

(2*RS*,3*SR*)-1-Acetyl-3-phenyl-2-(5-((*E*)-7-(pyrrolidin-1-yl)hept-1-en-1-yl)pyridin-3-yl)indoline-3-carbonitrile **123**



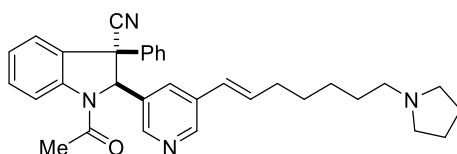

Indoline **123** was prepared according to general procedure 6, using indoline **93** (60 mg, 0.14 mmol), vinyl stannane **122** (78 mg, 0.17 mmol), and Pd(PPh<sub>3</sub>)<sub>4</sub> (17 mg, 0.014 mmol) in NMP (1.5 mL). The reaction mixture was stirred at 85 °C for 1.5 h. Purification by flash pressure column chromatography (4.5% MeOH/CH<sub>2</sub>Cl<sub>2</sub> + 0.5% aq. NH<sub>4</sub>OH) afforded indoline **123** as a pale yellow oil (38 mg, 0.075 mmol, 54%).

<sup>1</sup>H NMR (500 MHz, C<sub>6</sub>D<sub>6</sub>, 348 K): δ 1.23-1.35 (4H, m), 1.49 (2H, quin, *J* = 7.1 Hz), 1.63 (4H, m), 1.67 (3H, s), 1.93 (2H, m), 2.37 (2H, t, *J* = 7.2 Hz), 2.42 (4H, m), 5.71 (1H, s), 5.89 (1H, dt, *J* = 16.1 Hz, 6.2 Hz), 5.86 (1H, d, *J* = 16.1 Hz), 6.68-6.88 (6H, m), 7.00 (2H, m), 7.13 (1H, obscured), 7.91 (1H, app. s), 8.29 (1H, d, *J* = 2.0 Hz), 8.41 (1H, br. s).

<sup>13</sup>C NMR (125.75 MHz, C<sub>6</sub>D<sub>6</sub>, 348 K): δ 24.0, 24.3, 27.6, 29.5, 29.5, 33.4, 54.5, 56.0, 56.6, 73.6, 117.8, 121.6, 125.5, 126.5, 126.5, 128.9, 129.2, 131.3, 131.4, 132.1, 133.4, 134.1, 134.5, 145.1, 147.2, 148.4, 168.4. ‡

‡ 2 peaks obscured.

HRMS (ESI<sup>+</sup>, *m/z*): [C<sub>33</sub>H<sub>37</sub>N<sub>4</sub>O]<sup>+</sup> ([M+H]<sup>+</sup>) calc. 505.2962; found 505.2962.

(2*RS*,3*RS*)-1-Acetyl-3-phenyl-2-(5-((*E*)-7-(pyrrolidin-1-yl)hept-1-en-1-yl)pyridin-3-yl)indoline-3-carbonitrile **5**

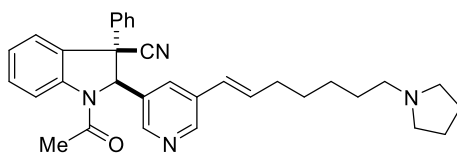

Indoline **5** was prepared according to general procedure 6, using indoline **94** (40 mg, 0.095 mmol), vinyl stannane **122** (48 mg, 0.11 mmol), and Pd(PPh<sub>3</sub>)<sub>4</sub> (11 mg, 0.0095 mmol) in NMP (1.2 mL). The reaction mixture was stirred at 85 °C for 2 h. Purification by flash pressure column chromatography (5% MeOH/CH<sub>2</sub>Cl<sub>2</sub> + 0.5% aq. NH<sub>4</sub>OH) afforded indoline **5** as a pale yellow oil (19 mg, 0.038 mmol, 40%).

<sup>1</sup>H NMR (500 MHz, C<sub>6</sub>D<sub>6</sub>, 348 K): 1.24-1.35 (4H, m), 1.42-1.56 (5H, m), 1.64 (4H, m), 1.93 (2H, app. q, *J* = 6.9 Hz), 2.38 (2H, t, *J* = 7.1 Hz), 2.43 (4H, m), 5.24 (1H, s), 5.94-6.10 (2H, m), † 6.77 (1H, t, *J* = 7.6 Hz), 6.95-7.04 (3H, m),

7.07 (1H, d,  $J = 7.6$  Hz), 7.12 (1H, obscured), 7.21-7.30 (2H, m), 7.42 (1H, t,  $J = 2.0$  Hz), 8.39 (1H, br. s), 8.45 (1H, d,  $J = 2.0$  Hz), 8.66 (1H, d,  $J = 2.0$  Hz).

$^1\text{H NMR}$  (500 MHz,  $\text{C}_6\text{D}_6$ ):  $\delta$  5.96 (1H, dt,  $J = 16.1$  Hz, 6.7 Hz), 5.86 (1H, d,  $J = 16.1$  Hz).

$^{13}\text{C NMR}$  (125.75 MHz,  $\text{C}_6\text{D}_6$ , 348 K):  $\delta$  23.7, 24.5, 27.9, 29.6, 29.6, 33.7, 54.7, 56.8, 58.3, 74.9, 117.7, 119.1, 126.0, 126.3, 126.5, 126.8, 129.4, 130.2, 130.6, 131.3, 134.1, 134.8, 135.1, 141.4, 144.1, 147.3, 149.9, 168.3.<sup>‡</sup>

<sup>‡</sup> 1 peak obscured.

HRMS (ESI<sup>+</sup>,  $m/z$ ):  $[\text{C}_{33}\text{H}_{37}\text{N}_4\text{O}]^+$  ( $[\text{M}+\text{H}]^+$ ) calc. 505.2962; found 505.2967.

Ethyl (2*RS*,3*RS*)-1-acetyl-3-cyano-2-(5-((*E*)-7-(pyrrolidin-1-yl)hept-1-en-1-yl)pyridin-3-yl)indoline-3-carboxylate

**124**

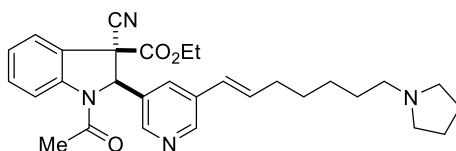

Indoline **124** was prepared according to general procedure 6, using indoline **99** (70 mg, 0.17 mmol), vinyl stannane **122** (108 mg, 0.24 mmol), and  $\text{Pd}(\text{PPh}_3)_4$  (20 mg, 0.017 mmol) in NMP (2.0 mL). The reaction mixture was stirred at 85 °C for 1 h. Purification by flash pressure column chromatography (5% MeOH/ $\text{CH}_2\text{Cl}_2$  + 0.5% aq.  $\text{NH}_4\text{OH}$ ) afforded indoline **124** as a pale yellow oil (30 mg, 0.060 mmol, 36%, contains minor impurities).

$^1\text{H NMR}$  (500 MHz,  $\text{C}_6\text{D}_6$ , 348 K):  $\delta$  0.65 (3H, t,  $J = 7.0$  Hz), 1.20-1.32 (4H, m), 1.46 (2H, quin,  $J = 7.1$  Hz), 1.59 (3H, s), 1.64 (4H, m), 1.90 (2H, app. q,  $J = 6.4$  Hz), 2.37 (2H, t,  $J = 7.1$  Hz), 2.41 (4H, m), 3.51 (2H, q,  $J = 7.0$  Hz), 5.81 (1H, br. s), 5.91 (1H, d,  $J = 16.1$  Hz), 5.97 (1H, dt,  $J = 16.1$  Hz, 6.4 Hz), 6.82 (1H, td,  $J = 7.7$  Hz, 0.9 Hz), 7.08 (1H, td,  $J = 7.7$  Hz, 1.3 Hz), 7.22 (1H, app. d,  $J = 7.5$  Hz), 7.26 (1H, m), 8.12 (1H, br. s), 8.31 (1H, d,  $J = 2.2$  Hz), 8.51 (1H, d,  $J = 2.2$  Hz).

$^{13}\text{C NMR}$  (125.75 MHz,  $\text{C}_6\text{D}_6$ , 348 K):  $\delta$  13.7, 23.9, 24.5, 27.8, 29.5, 29.6, 33.6, 54.7, 56.4, 56.8, 63.8, 70.6, 117.4, 118.3, 125.4, 125.4, 126.4, 127.4, 131.4, 131.7, 132.0, 134.2, 135.3, 144.5, 147.8, 149.5, 164.4, 168.0.

HRMS (ESI<sup>+</sup>,  $m/z$ ):  $[\text{C}_{30}\text{H}_{37}\text{N}_4\text{O}_3]^+$  ( $[\text{M}+\text{H}]^+$ ) calc. 501.2860; found 501.2847.

Methyl (2*RS*,3*SR*)-1-acetyl-3-phenyl-2-(5-((*E*)-7-(pyrrolidin-1-yl)hept-1-en-1-yl)pyridin-3-yl)indoline-3-carboxylate **125**

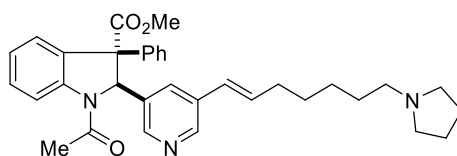

Indoline **125** was prepared according to general procedure 6, using indoline **100** (50 mg, 0.11 mmol), vinyl stannane **122** (71 mg, 0.16 mmol), and Pd(PPh<sub>3</sub>)<sub>4</sub> (13 mg, 0.011 mmol) in NMP (1.5 mL). The reaction mixture was stirred at 85 °C for 1.2 h. Purification by flash pressure column chromatography (6.5% MeOH/CH<sub>2</sub>Cl<sub>2</sub> + 0.5% aq. NH<sub>4</sub>OH) afforded indoline **125** as a pale yellow oil (40 mg, 0.074 mmol, 67%).

<sup>1</sup>H NMR (500 MHz, C<sub>6</sub>D<sub>6</sub>, 348 K): δ 1.23-1.39 (4H, m), 1.49 (2H, quin, *J* = 6.8 Hz), 1.64 (4H, m), 1.88-1.99 (5H, m), 2.39 (2H, t, *J* = 7.2 Hz), 2.42 (4H, m), 3.23 (3H, s), 5.84 (1H, dt, *J* = 16.0 Hz, 6.1 Hz), 5.90 (1H, d, *J* = 16.0 Hz), 6.45 (1H, s), 6.77-6.95 (7H, m), 7.21 (1H, td, *J* = 7.7 Hz, 1.3 Hz), 7.36 (1H, d, *J* = 7.7 Hz), 8.07 (1H, app. s), 8.29 (1H, s), 8.64 (1H, br. s).

<sup>13</sup>C NMR (125.75 MHz, C<sub>6</sub>D<sub>6</sub>, 348 K): δ 24.1, 24.5, 27.8, 29.7, 29.7, 33.6, 53.1, 54.7, 56.8, 68.4, 70.6, 118.0, 124.6, 127.0, 128.8, 129.0, 130.2, 130.7, 131.4, 133.4, 134.1, 134.3, 137.7, 145.5, 147.9, 147.9, 168.6, 173.2. ‡

‡ Remaining 2 peaks obscured.

HRMS (ES<sup>+</sup>): [C<sub>34</sub>H<sub>40</sub>N<sub>3</sub>O<sub>3</sub>]<sup>+</sup> ([M+H]<sup>+</sup>) calc. 538.3064; found 538.3058.

Methyl (2*RS*,3*RS*)-1-acetyl-3-phenyl-2-(5-((*E*)-7-(pyrrolidin-1-yl)hept-1-en-1-yl)pyridin-3-yl)indoline-3-carboxylate **10**

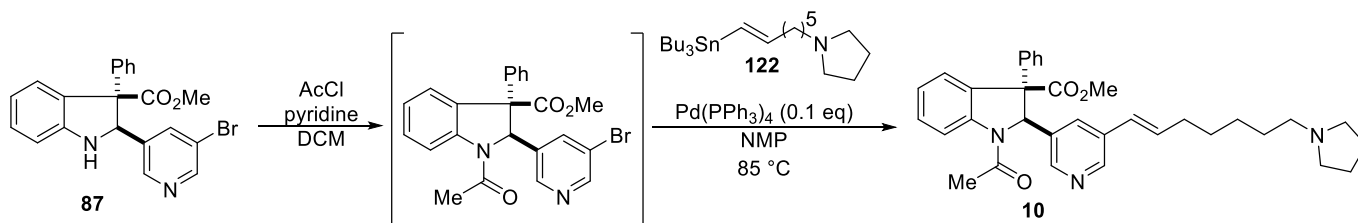

Acetyl chloride (12 μL, 0.16 mmol) was added to a solution of indoline **87** (37 mg, 0.09 mmol) and pyridine (13 μL, 0.16 mmol) in CH<sub>2</sub>Cl<sub>2</sub> (5 mL). The reaction mixture was stirred at rt for 20 min. NaHCO<sub>3</sub> (saturated aq.)

was added, and the mixture was extracted with CH<sub>2</sub>Cl<sub>2</sub>. The combined organic extracts were washed with brine, dried over Na<sub>2</sub>SO<sub>4</sub>, filtered, and concentrated. The remaining residue (45 mg) was dissolved together with vinyl stannane **122** (57 mg, 0.12 mmol) in NMP (2.0 mL) and degassed with Ar. Pd(PPh<sub>3</sub>)<sub>4</sub> (10 mg, 0.0087 mmol) was added, and the mixture was stirred at 85 °C for 4.5 h. The mixture was diluted with CH<sub>2</sub>Cl<sub>2</sub> and washed with H<sub>2</sub>O, then brine. The organic layer was dried over Na<sub>2</sub>SO<sub>4</sub>, filtered, and concentrated. Purification by flash pressure column chromatography (5% MeOH/CH<sub>2</sub>Cl<sub>2</sub> + 0.5% aq. NH<sub>4</sub>OH) afforded indoline **10** as a pale yellow oil (20 mg, 0.037 mmol, 41%).

**<sup>1</sup>H NMR (500 MHz, (CD<sub>3</sub>)<sub>2</sub>SO, 363 K):** δ 1.33-1.39 (2H, quin, *J* = 6.9 Hz), 1.40-1.51 (4H, m), 1.67 (4H, m), 2.15 (3H, s), 2.19 (2H, app. q, *J* = 7.2 Hz), 2.38 (2H, t, *J* = 7.3 Hz), 2.42 (4H, m), 3.23 (3H, s), 6.18 (1H, s), 6.26 (1H, dt, *J* = 16.0 Hz, 6.7 Hz), 6.35 (1H, d, *J* = 16.0 Hz), 7.19 (1H, t, *J* = 7.6 Hz), 7.30 (1H, t, *J* = 7.3 Hz), 7.37 (3H, m), 7.44 (2H, app. d, *J* = 7.6 Hz), 7.53 (1H, s), 7.63 (1H, d, *J* = 7.6 Hz), 7.99 (1H, br. s), 8.19 (1H, d, *J* = 1.9 Hz), 8.49 (1H, d, *J* = 1.9 Hz).

**<sup>13</sup>C NMR (125.75 MHz, (CD<sub>3</sub>)<sub>2</sub>SO, 363 K):** δ 22.8, 23.2, 26.1, 27.7, 27.9, 31.7, 51.2, 53.0, 55.1, 69.1, 115.5, 123.5, 125.3, 127.1, 127.3, 128.3, 128.4, 130.6, 132.1, 133.3, 133.5, 133.5, 141.3, 141.6, 146.0, 146.9, 167.4, 169.3. ‡

‡ 1 peak obscured.

**HRMS (ES<sup>+</sup>):** [C<sub>34</sub>H<sub>40</sub>N<sub>3</sub>O<sub>3</sub>]<sup>+</sup> ([M+H]<sup>+</sup>) calc. 538.3064; found 538.3066.

(2*RS*,3*SR*)-1-Acetyl-3-phenyl-2-(3-((*E*)-7-(pyrrolidin-1-yl)hept-1-en-1-yl)phenyl)indoline-3-carbonitrile **126**

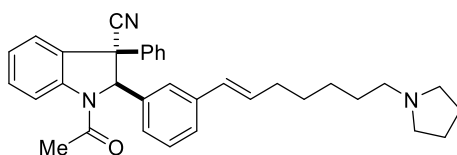

Indoline **126** was prepared according to general procedure 6, using indoline **103** (38 mg, 0.091 mmol), vinyl stannane **122** (66 mg, 0.15 mmol), and Pd(PPh<sub>3</sub>)<sub>4</sub> (11 mg, 0.0095 mmol) in NMP (1.6 mL). The reaction mixture was stirred at 90 °C for 2.5 h. Purification by flash pressure column chromatography (5% MeOH/CH<sub>2</sub>Cl<sub>2</sub> + 0.5% aq. NH<sub>4</sub>OH) afforded indoline **126** as a pale yellow oil (27 mg, 0.054 mmol, 59%).

**<sup>1</sup>H NMR (500 MHz, C<sub>6</sub>D<sub>6</sub>, 348 K):** δ 1.35 (4H, m), 1.50 (2H, quin, *J* = 6.8 Hz), 1.59-1.67 (4H, m), 1.69 (3H, s), 2.00 (2H, app. q, *J* = 6.8 Hz), 2.35-2.49 (6H, m), 5.64 (1H, s), 5.84 (1H, dt, *J* = 15.8 Hz, 6.8 Hz), 6.00 (1H, d, *J* = 15.8 Hz),

6.43 (1H, d,  $J = 7.5$  Hz), 6.55 (1H, br. s), 6.64 (1H, t,  $J = 7.5$  Hz), 6.74-6.88 (6H, m), 7.03 (2H, m), 7.12-7.20 (1H, obscured), 8.69 (1H, d,  $J = 8.2$  Hz).

$^{13}\text{C}$  NMR (125.75 MHz,  $\text{C}_6\text{D}_6$ ):  $\delta$  24.3, 24.3, 27.8, 29.7, 29.9, 33.6, 54.7, 56.1, 56.8, 75.4, 117.9, 122.1, 125.5, 126.2, 126.5, 127.9, 128.9, 129.1, 129.2, 129.8, 131.4, 132.3, 134.3, 136.8, 138.8, 145.4, 169.2.<sup>‡</sup>

‡ 3 peaks obscured

HRMS (ESI<sup>+</sup>,  $m/z$ ):  $[\text{C}_{34}\text{H}_{38}\text{N}_3\text{O}]^+$  ( $[\text{M}+\text{H}]^+$ ) calc. 504.3009; found 504.2998.

(2*RS*,3*RS*)-1-Acetyl-3-phenyl-2-(3-((*E*)-7-(pyrrolidin-1-yl)hept-1-en-1-yl)phenyl)indoline-3-carbonitrile **9**

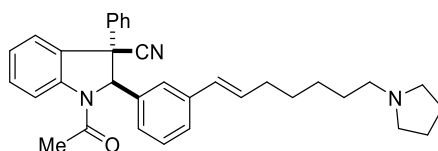

Indoline **9** was prepared according to general procedure 6, using indoline **104** (50 mg, 0.12 mmol), vinyl stannane **122** (77 mg, 0.17 mmol), and  $\text{Pd}(\text{PPh}_3)_4$  (14 mg, 0.012 mmol) in NMP (2.0 mL). The reaction mixture was stirred at 85 °C for 1.5 h. Purification by flash pressure column chromatography (4.5% MeOH/ $\text{CH}_2\text{Cl}_2$  + 0.5% aq.  $\text{NH}_4\text{OH}$ ) afforded indoline **9** as a pale yellow oil (35 mg, 0.070 mmol, 58%).

$^1\text{H}$  NMR (500 MHz,  $\text{C}_6\text{D}_6$ , 348 K):  $\delta$  1.37 (4H, m), 1.51 (2H, quin,  $J = 6.9$  Hz), 1.57 (3H, s), 1.60-1.68 (4H, m), 2.05 (2H, app. q,  $J = 6.7$  Hz), 2.35-2.47 (6H, m), 5.22 (1H, s), 6.11 (1H, dt,  $J = 15.6$  Hz, 6.8 Hz), 6.25 (1H, d,  $J = 15.6$  Hz), 6.80 (1H, t,  $J = 7.6$  Hz), 6.95 (1H, d,  $J = 7.3$  Hz), 6.98-7.07 (4H, m), 7.11 (1H, d,  $J = 7.6$  Hz), 7.17-7.22 (2H, m), 7.24 (1H, s), 7.33 (2H, m), 8.62 (1H, d,  $J = 7.8$  Hz).

$^{13}\text{C}$  NMR (125.75 MHz,  $\text{C}_6\text{D}_6$ , 348 K):  $\delta$  24.0, 24.3, 27.9, 29.7, 29.8, 33.7, 54.7, 56.8, 58.5, 77.1, 117.7, 119.1, 125.0, 125.2, 125.8, 126.3, 126.4, 127.3, 128.9, 129.2, 130.1, 130.1, 130.2, 131.2, 132.7, 138.9, 139.9, 141.9, 144.4, 168.9.

HRMS (ESI<sup>+</sup>,  $m/z$ ):  $[\text{C}_{34}\text{H}_{38}\text{N}_3\text{O}]^+$  ( $[\text{M}+\text{H}]^+$ ) calc. 504.3009; found 504.2993.

(2*RS*,3*RS*)-1-(3-(3-Methyl-3H-diazirin-3-yl)propanoyl)-3-phenyl-2-(5-((*E*)-7-(pyrrolidin-1-yl)hept-1-en-1-yl)pyridin-3-yl)indoline-3-carbonitrile **127**

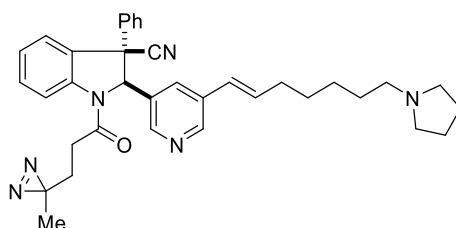

Indoline **127** was prepared according to general procedure 6 using indoline **116** (35 mg, 0.072 mmol), vinyl stannane **122** (39 mg, 0.086 mmol), and Pd(PPh<sub>3</sub>)<sub>4</sub> (8 mg, 0.007 mmol) in NMP (1.5 mL). The reaction mixture was stirred at 60 °C for 3.5 h. Purification by flash pressure column chromatography (6.5% MeOH/CH<sub>2</sub>Cl<sub>2</sub> + 0.5% aq. NH<sub>4</sub>OH) afforded indoline **127** as a pale yellow paste (14 mg, 0.024 mmol, 34%).

<sup>1</sup>H NMR (500 MHz, C<sub>6</sub>D<sub>6</sub>, 348 K): δ 0.53 (3H, s), 1.22-1.34 (4H, m), 1.34-1.51 (4H, m), 1.56-1.73 (6H, m), 1.93 (2H, app. q, *J* = 6.4 Hz), 2.36 (2H, t, *J* = 7.3 Hz), 2.41 (4H, m), 5.35 (1H, s), 5.98-6.10 (2H, m),<sup>†</sup> 6.96-7.06 (3H, m), 7.08 (1H, d, *J* = 7.8 Hz), 7.12 (1H, t, *J* = 7.9 Hz), 7.28 (2H, app. d, *J* = 7.5 Hz), 7.45 (1H, app. s), 8.36 (1H, br. s), 8.48 (1H, app. s), 8.65 (1H, app. s).

<sup>†</sup> <sup>1</sup>H NMR (500 MHz, C<sub>6</sub>D<sub>6</sub>): δ 6.00 (1H, dt, *J* = 15.9 Hz, 6.7 Hz), 5.94 (1H, d, *J* = 15.9 Hz).

<sup>13</sup>C NMR (126 MHz, C<sub>6</sub>D<sub>6</sub>, 348 K): δ 20.0, 24.5, 25.1, 27.8, 29.5, 29.6, 29.6, 30.3, 33.6, 54.6, 56.7, 58.3, 74.5, 117.8, 118.9, 126.1, 126.3, 126.5, 126.8, 129.4, 130.2, 130.8, 131.2, 133.9, 134.8, 135.2, 141.2, 143.8, 147.2, 150.0, 169.8.<sup>‡</sup>

<sup>‡</sup> 1 peak obscured.

HRMS (ES<sup>+</sup>): [C<sub>36</sub>H<sub>41</sub>ON<sub>6</sub>]<sup>+</sup> ([M+H]<sup>+</sup>) requires 573.3336; found 573.3339.

7-bromohept-1-yne **128**

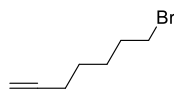

Alkyne **128** was prepared according to a literature procedure.<sup>16</sup> PPh<sub>3</sub> (1.22 mg, 4.64 mmol) was added portionwise to a solution of 6-heptyn-1-ol (400 g, 3.57 mmol) and CBr<sub>4</sub> (1.54 g, 4.64 mmol) in CH<sub>2</sub>Cl<sub>2</sub> (8 mL), and

the mixture was stirred at 0 °C for 1.5 h. Ice-cooled hexane (30 mL) was added. The white precipitate was removed by filtration, and the filtrate was concentrated. Purification by flash pressure column chromatography (100% petroleum ether) afforded alkyne **128** as a colorless liquid (537 mg, 3.07 mmol, 86%).

$^1\text{H}$  (400 MHz,  $\text{CDCl}_3$ ):  $\delta$  3.42 (2H, t,  $J = 6.8$  Hz), 2.22 (2H, app. m), 1.96 (1H, t,  $J = 2.7$  Hz), 1.89 (2H, app. m), 1.48-1.64 (4H, m).

$^{13}\text{C}$  (101 MHz,  $\text{CDCl}_3$ ):  $\delta$  84.1, 68.5, 33.5, 32.3, 27.6, 27.3, 18.3.

7-Pyrrolidine-hept-1-yne **129**

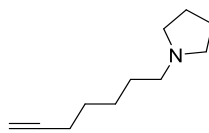

Alkyne **128** (280 mg, 1.60 mmol) in THF (4 mL) was added to a solution of pyrrolidine (1.3 mL, 16 mmol) in THF (4 mL). The mixture was stirred at 50 °C for 1.5 h.  $\text{H}_2\text{O}$  was added, and the mixture was extracted with  $\text{Et}_2\text{O}$ . The combined organic extracts were washed with brine, dried over  $\text{Na}_2\text{SO}_4$ , filtered, and concentrated. Purification by flash pressure column chromatography (5%  $\text{MeOH}/\text{CH}_2\text{Cl}_2$  + 0.5% aq.  $\text{NH}_4\text{OH}$ ) afforded alkyne **129** as a yellow liquid (245 mg, 1.48 mmol, 41%).

$^1\text{H}$  NMR (400 MHz,  $\text{CDCl}_3$ ):  $\delta$  1.43 (2H, quin,  $J = 7.1$  Hz), 1.47-1.61 (4H, m), 1.76 (4H, m), 1.93 (1H, t,  $J = 2.7$  Hz), 2.18 (2H, td,  $J = 7.0$  Hz, 2.7 Hz), 2.37-2.53 (6H, m).

$^{13}\text{C}$  NMR (100.6 MHz,  $\text{CDCl}_3$ ):  $\delta$  18.3, 23.4, 26.8, 28.4, 28.6, 54.2, 56.5, 68.1, 84.6.

HRMS ( $\text{ES}^+$ ):  $[\text{C}_{11}\text{H}_{20}\text{N}]^+$  ( $[\text{M}+\text{H}]^+$ ) requires 166.1590; found 166.1592.

(2*RS*,3*SR*)-1-Acetyl-3-phenyl-2-(5-(7-(pyrrolidin-1-yl)hept-1-yn-1-yl)pyridin-3-yl)indoline-3-carbonitrile **130**

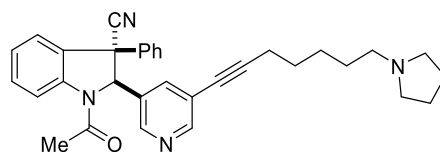

Indoline **130** was prepared according to general procedure 7, using indoline **93** (70 mg, 0.17 mmol), alkyne **129** (41 mg, 0.25 mmol),  $\text{PdCl}_2(\text{PPh}_3)_2$  (5.9 mg, 0.0084 mmol), and  $\text{CuI}$  (1.6 mg, 0.0084 mmol) in *N,N*-

diisopropylamine (2.5 mL). The reaction mixture was stirred at 70 °C for 1 h. Purification by flash pressure column chromatography (5% MeOH/CH<sub>2</sub>Cl<sub>2</sub> + 0.5% aq. NH<sub>4</sub>OH) afforded indoline **130** as a pale yellow oil (55 mg, 0.11 mmol, 66%).

<sup>1</sup>H NMR (500 MHz, C<sub>6</sub>D<sub>6</sub>, 348 K): δ 1.32-1.44 (6H, m), 1.57-1.67 (7H, m), 2.09 (2H, t, *J* = 6.6 Hz), 2.33 (2H, t, *J* = 6.9 Hz), 2.39 (4H, m), 5.63 (1H, s), 6.73 (1H, t, *J* = 7.7 Hz), 6.76-6.86 (4H, m), 6.89-6.99 (3H, m), 7.08 (1H, td, *J* = 7.7 Hz, 1.3 Hz), 7.84 (1H, br. s), 8.26 (1H, br. s), 8.45 (1H, d, *J* = 1.9 Hz).

<sup>13</sup>C NMR (125.75 MHz, C<sub>6</sub>D<sub>6</sub>): δ 19.9, 24.1, 24.3, 27.4, 28.9, 29.1, 54.6, 55.7, 56.6, 72.8, 77.7, 95.4, 117.8, 121.4, 121.6, 125.7, 126.6, 128.9, 129.1, 129.4, 131.5, 132.0, 133.5, 136.8, 137.9, 144.7, 147.5, 152.7, 168.4.

HRMS (ESI<sup>+</sup>, *m/z*): [C<sub>33</sub>H<sub>35</sub>N<sub>4</sub>O]<sup>+</sup> ([M+H]<sup>+</sup>) calc. 503.2805; found 503.2792.

(2*RS*,3*RS*)-1-Acetyl-3-phenyl-2-(5-(7-(pyrrolidin-1-yl)hept-1-yn-1-yl)pyridin-3-yl)indoline-3-carbonitrile **4**

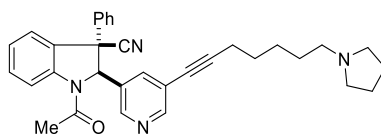

Indoline **4** was prepared according to general procedure 7, using indoline **94** (70 mg, 0.17 mmol), alkyne **129** (41 mg, 0.25 mmol), PdCl<sub>2</sub>(PPh<sub>3</sub>)<sub>2</sub> (5.9 mg, 0.0084 mmol), and CuI (1.6 mg, 0.0084 mmol) in *N,N*-diisopropylamine (2.5 mL). The reaction mixture was stirred at 70 °C for 1.25 h. Purification by flash pressure column chromatography (5% MeOH/CH<sub>2</sub>Cl<sub>2</sub> + 0.5% aq. NH<sub>4</sub>OH) afforded indoline **4** as a pale yellow oil (66 mg, 0.092 mmol, 79%). The non-racemic forms of indoline **4** were prepared from indolines (*R,R*)-**110** and (*S,S*)-**110**, following the same procedure.

<sup>1</sup>H NMR (500 MHz, C<sub>6</sub>D<sub>6</sub>, 348 K): δ 1.34-1.45 (6H, m), 1.47 (3H, s), 1.62 (4H, m), 2.13 (2H, t, *J* = 6.9 Hz), 2.33 (2H, t, *J* = 6.9 Hz), 2.40 (4H, m), 5.18 (1H, br. s), 6.73 (1H, t, *J* = 7.7 Hz), 6.95-7.04 (4H, m), 7.06 (1H, app. t, *J* = 7.7 Hz), 7.19 (2H, m), 7.60 (1H, s), 8.21 (1H, br. s), 8.46 (1H, d, *J* = 2.2 Hz), 8.81 (1H, d, *J* = 1.9 Hz).

<sup>13</sup>C NMR (125.75 MHz, C<sub>6</sub>D<sub>6</sub>): δ 20.0, 23.7, 24.3, 27.4, 28.9, 29.1, 54.6, 56.5, 58.0, 74.2, 77.9, 96.0, 117.7, 118.3, 119.0, 126.1, 126.3, 126.4, 129.4, 130.2, 130.6, 131.3, 133.8, 136.1, 140.9, 143.6, 147.2, 154.4, 168.1.

HRMS (ESI<sup>+</sup>, *m/z*): [C<sub>33</sub>H<sub>35</sub>N<sub>4</sub>O]<sup>+</sup> ([M+H]<sup>+</sup>) calc. 503.2805; found 503.2790.

[α]<sub>D</sub><sup>25.0</sup> (*S,S*) = -55 (*c* = 0.1, CHCl<sub>3</sub>).



(2*SR*,3*RS*)-1-acetyl-3-phenyl-2-(5-(7-(pyrrolidin-1-yl)hept-1-yn-1-yl)furan-2-yl)indoline-3-carbonitrile **132**

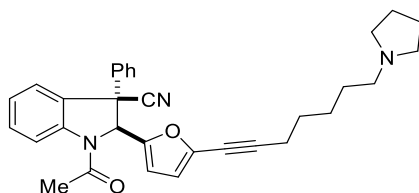

Indoline **132** was prepared according to general procedure 7, using indoline **106** (50 mg, 0.12 mmol), alkyne **129** (26 mg, 0.16 mmol), PdCl<sub>2</sub>(PPh<sub>3</sub>)<sub>2</sub> (4 mg, 0.006 mmol), and CuI (1 mg, 0.006 mmol) in *N,N*-diisopropylamine (5 mL). The reaction mixture was stirred at 70 °C for 2.5 h. Purification by flash pressure column chromatography (4.5 % MeOH/CH<sub>2</sub>Cl<sub>2</sub> + 0.5% aq. NH<sub>4</sub>OH) afforded indoline **132** as a pale yellow oil (51 mg, 0.10 mmol, 83%).

<sup>1</sup>H NMR (500 MHz, C<sub>6</sub>D<sub>6</sub>, 348 K): δ 1.33-1.42 (6H, m), 1.55 (3H, s), 1.62 (4H, m), 2.13 (2H, t, *J* = 6.8 Hz), 2.31 (2H, t, *J* = 6.9 Hz), 2.38 (4H, m), 5.31 (1H, br. s), 5.90 (1H, d, *J* = 3.4 Hz), 6.22 (1H, d, *J* = 3.4 Hz), 6.77 (1H, td, *J* = 7.6 Hz, 0.9 Hz), 6.92-7.01 (3H, m), 7.08-7.14 (2H, m), 7.20-7.27 (2H, m), 8.39 (1H, br. s).

<sup>13</sup>C NMR (125.75 MHz, C<sub>6</sub>D<sub>6</sub>): δ 20.0, 23.3, 24.3, 27.4, 28.8, 29.2, 54.6, 56.6, 57.0, 71.0, 71.8, 96.8, 110.2, 115.6, 118.1, 118.8, 125.7, 126.2, 126.4, 129.3, 130.1, 131.0, 139.7, 140.5, 143.4, 150.9, 168.3. ‡

‡ 1 peak obscured.

HRMS (ESI<sup>+</sup>, *m/z*): [C<sub>32</sub>H<sub>34</sub>N<sub>3</sub>O<sub>2</sub>]<sup>+</sup> ([M+H]<sup>+</sup>) calc. 492.2645; found 492.2639.

(2*SR*,3*SR*)-1-acetyl-3-phenyl-2-(5-(7-(pyrrolidin-1-yl)hept-1-yn-1-yl)furan-2-yl)indoline-3-carbonitrile **133**

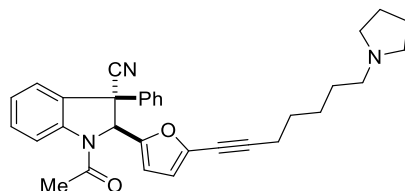

Indoline **133** was prepared according to general procedure 7, using indoline **105** (50 mg, 0.12 mmol), alkyne **129** (26 mg, 0.16 mmol), PdCl<sub>2</sub>(PPh<sub>3</sub>)<sub>2</sub> (4 mg, 0.006 mmol), and CuI (1 mg, 0.006 mmol) in *N,N*-diisopropylamine (5 mL). The reaction mixture was stirred at 70 °C for 1.5 h. Purification by flash pressure column

chromatography (4% MeOH/CH<sub>2</sub>Cl<sub>2</sub> + 0.5% aq. NH<sub>4</sub>OH) afforded indoline **133** as a pale yellow oil (50 mg, 0.10 mmol, 82%).

<sup>1</sup>H NMR (500 MHz, C<sub>6</sub>D<sub>6</sub>): δ 1.21-1.30 (4H, m), 1.34 (2H, quin, *J* = 6.7 Hz), 1.54 (3H, br. s), 1.62 (4H, m), 1.98 (2H, t, *J* = 6.5 Hz), 2.27 (2H, t, *J* = 7.1 Hz), 2.35 (4H, m), 5.39 (1H, d, *J* = 3.4 Hz), 5.55 (1H, br. s), 5.84 (1H, d, *J* = 3.4 Hz), 6.69 (1H, td, *J* = 7.6 Hz, 1.0 Hz), 6.74 (1H, dd, *J* = 7.6 Hz, 1.2 Hz), 6.94-7.03 (3H, m), 7.07 (1H, t, *J* = 7.5 Hz), 7.23 (2H, m), 8.75 (1H, br. s).

<sup>13</sup>C NMR (125.75 MHz, C<sub>6</sub>D<sub>6</sub>): δ 19.8, 23.6, 24.2, 27.3, 28.7, 29.0, 54.6, 55.3, 56.5, 69.9, 71.3, 96.0, 111.1, 114.7, 118.2, 121.2, 125.3, 126.3, 128.7, 128.9, 129.3, 131.2, 133.9, 139.0, 144.6, 149.2, 168.4. ‡

‡ 1 peak obscured.

HRMS (ESI<sup>+</sup>, *m/z*): [C<sub>32</sub>H<sub>34</sub>N<sub>3</sub>O<sub>2</sub>]<sup>+</sup> ([M+H]<sup>+</sup>) calc. 492.2645; found 492.2634.

(2*SR*,3*RS*)-1-acetyl-3-phenyl-2-(4-(7-(pyrrolidin-1-yl)hept-1-yn-1-yl)furan-2-yl)indoline-3-carbonitrile **134**

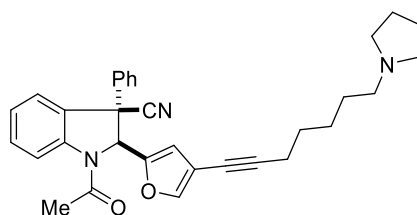

Indoline **134** was prepared according to general procedure 7, using indoline **107** (50 mg, 0.12 mmol), alkyne **129** (28 mg, 0.17 mmol), PdCl<sub>2</sub>(PPh<sub>3</sub>)<sub>2</sub> (4 mg, 0.006 mmol), and CuI (1 mg, 0.006 mmol) in *N,N*-diisopropylamine (5 mL). The reaction mixture was stirred at 70 °C for 16 h. Purification by flash pressure column chromatography (4.5% MeOH/CH<sub>2</sub>Cl<sub>2</sub> + 0.5% aq. NH<sub>4</sub>OH) afforded indoline **134** as a pale yellow oil (15 mg, 0.031 mmol, 24%).

<sup>1</sup>H NMR (500 MHz, C<sub>6</sub>D<sub>6</sub>, 348 K): δ 1.33-1.49 (9H, m), 1.61 (4H, m), 2.19 (2H, t, *J* = 6.7 Hz), 2.31 (2H, t, *J* = 7.0 Hz), 2.37 (4H, m), 5.08 (1H, br. s), 6.21 (1H, br. s), 6.72 (1H, td, *J* = 7.5 Hz, 1.1 Hz), 6.90-6.97 (3H, m), 7.00-7.13 (2H, m), 7.20 (1H, s), 7.24 (2H, m), 8.68 (1H, br. s).

<sup>13</sup>C NMR (125.75 MHz, C<sub>6</sub>D<sub>6</sub>): δ 20.0, 23.3, 24.2, 27.4, 29.1, 29.2, 54.6, 56.6, 56.7, 70.6, 93.4, 110.4, 112.6, 118.2, 118.8, 125.7, 125.9, 126.3, 129.4, 130.1, 131.0, 140.4, 143.4, 146.6, 150.8, 168.2. ‡

‡ 2 peaks obscured.

**HRMS (ES<sup>+</sup>):** [C<sub>32</sub>H<sub>34</sub>O<sub>2</sub>N<sub>3</sub>]<sup>+</sup> ([M+H]<sup>+</sup>) requires 492.26455; found 492.26437.

(2*RS*,3*RS*)-1-(2-cyanoacetyl)-3-phenyl-2-(5-(7-(pyrrolidin-1-yl)hept-1-yn-1-yl)pyridin-3-yl)indoline-3-carbonitrile

**135**

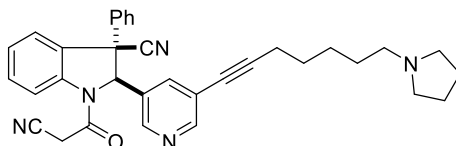

Indoline **135** was prepared according to general procedure 7 using indoline **113** (40 mg, 0.090 mmol), alkyne **129** (16 mg, 0.099 mmol), PdCl<sub>2</sub>(PPh<sub>3</sub>)<sub>2</sub> (3.2 mg, 0.0045 mmol), and CuI (< 1 mg) in diisopropylamine (2 mL). The reaction mixture was stirred at 70 °C for 4.5 h. Purification by flash pressure column chromatography (4.5% MeOH/CH<sub>2</sub>Cl<sub>2</sub> + 0.5% aq. NH<sub>4</sub>OH) afforded indoline **135** as a colorless oil (19 mg, 0.036 mmol, 40%, contains minor impurities).

<sup>1</sup>H NMR (400 MHz, C<sub>6</sub>D<sub>6</sub>, 348 K): δ 1.34-1.50 (6H, m), 1.64 (4H, m), 2.14 (2H, t, *J* = 6.6 Hz), 2.28-2.37 (4H, m), 2.40 (4H, m), 5.06 (1H, br. s), 6.72 (1H, t, *J* = 7.5 Hz), 6.93-7.08 (5H, m), 7.12 (2H, m), 7.47 (1H, app. s), 8.01 (1H, br. s), 8.34 (1H, d, *J* = 1.8 Hz), 8.80 (1H, d, *J* = 1.5 Hz).

<sup>13</sup>C NMR (100.6 MHz, C<sub>6</sub>D<sub>6</sub>, 348 K): δ 20.1, 24.5, 26.7, 27.6, 29.0, 29.2, 54.7, 56.6, 58.4, 74.1, 77.8, 96.6, 112.7, 117.7, 118.5, 122.9, 126.2, 126.6, 127.2, 129.7, 130.4, 131.5, 132.5, 136.0, 140.3, 142.6, 146.8, 154.9, 160.2.<sup>†</sup>

<sup>†</sup> 1 peak obscured.

**HRMS (ES<sup>+</sup>):** [C<sub>34</sub>H<sub>34</sub>N<sub>5</sub>O]<sup>+</sup> ([M+H]<sup>+</sup>) requires 528.2763; found 528.2762.

(2*RS*,3*RS*)-1-(2-(1,3-dioxoisindolin-2-yl)acetyl)-3-phenyl-2-(5-(7-(pyrrolidin-1-yl)hept-1-yn-1-yl)pyridin-3-yl)indoline-3-carbonitrile **136**

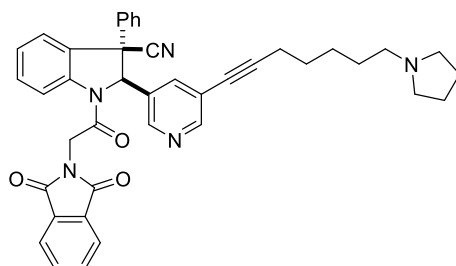

Indoline **136** was prepared according to general procedure 7 using indoline **115** (62 mg, 0.11 mmol), alkyne **129** (23 mg, 0.14 mmol), Pd(Ph<sub>3</sub>)<sub>2</sub>Cl<sub>2</sub> (4 mg, 0.006 mmol), and CuI (app.rox. 1 mg) in *N,N*-diisopropylamine (2 mL). The reaction mixture was stirred at 70 °C for 3 h. Purification by flash pressure column chromatography (4.5% MeOH/CH<sub>2</sub>Cl<sub>2</sub> + 0.5% aq. NH<sub>4</sub>OH) afforded indoline **136** as a pale yellow oil (34 mg, 0.053 mmol, 48%).

<sup>1</sup>H NMR (400 MHz, C<sub>6</sub>D<sub>6</sub>, 348 K): δ 1.32-1.51 (6H, m), 1.62 (4H, m), 2.13 (2H, t, *J* = 6.7 Hz), 2.33 (2H, t, *J* = 7.0 Hz), 2.40 (4H, m), 4.00 (1H, d, *J* = 16.4 Hz), 4.19 (1H, d, *J* = 16.4 Hz), 5.50 (1H, s), 6.70 (1H, t, *J* = 7.6 Hz), 6.87-6.95 (2H, m), 6.95-7.03 (3H, m), 7.03-7.12 (2H, m), 7.29 (2H, app. d, *J* = 7.4 Hz), 7.37-7.50 (2H, m), 7.68 (1H, s), 7.99 (1H, br. s), 8.52 (1H, s), 8.81 (1H, s).

<sup>13</sup>C NMR (100.6 MHz, C<sub>6</sub>D<sub>6</sub>, 348 K): δ 20.1, 24.4, 27.5, 29.0, 29.0, 41.1, 54.6, 56.6, 58.6, 73.7, 78.2, 95.9, 117.9, 118.7, 122.7, 123.7, 126.1, 126.3, 126.6, 129.5, 130.3, 131.2, 133.1, 134.0, 136.4, 140.7, 142.9, 147.2, 154.6, 164.9, 167.5.<sup>†</sup>

<sup>†</sup> 2 peaks obscured.

HRMS (ES<sup>+</sup>): [C<sub>41</sub>H<sub>38</sub>N<sub>5</sub>O<sub>3</sub>]<sup>+</sup> ([M+H]<sup>+</sup>) requires 648.2969; found 648.2963.

(2*RS*,3*RS*)-3-phenyl-2-(5-(7-(pyrrolidin-1-yl)hept-1-yn-1-yl)pyridin-3-yl)indoline-3-carbonitrile **137**

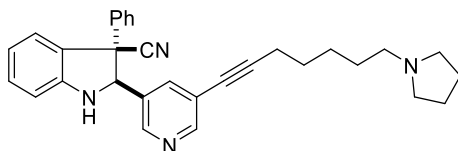

Indoline **137** was prepared according to general procedure 7, using indoline **84** (215 mg, 0.57 mmol), alkyne **129** (104 mg, 0.63 mmol), Pd(PPh<sub>3</sub>)<sub>2</sub>Cl<sub>2</sub> (20 mg, 0.03 mmol), and CuI (5 mg, 0.03 mmol) in *N,N*-diisopropylamine (5 mL). The reaction mixture was stirred at 60 °C for 3 h. Purification by flash pressure column chromatography (4.5% MeOH/CH<sub>2</sub>Cl<sub>2</sub> + 0.5% aq. NH<sub>4</sub>OH) afforded indoline **137** as a pale yellow oil (80 mg, 0.17 mmol, 31%).

<sup>1</sup>H NMR (500 MHz, C<sub>6</sub>D<sub>6</sub>): δ 1.33-1.50 (6H, m), 1.63 (4H, m), 2.15 (2H, t, *J* = 6.6 Hz), 2.33 (2H, t, *J* = 6.9 Hz), 2.38 (4H, m), 2.99 (1H, d, *J* = 3.2 Hz), 4.29 (1H, d, *J* = 3.2 Hz), 6.42 (1H, d, *J* = 7.6 Hz), 6.59 (1H, td, *J* = 7.6 Hz, 0.9 Hz), 6.73 (1H, d, *J* = 7.6 Hz), 6.93-7.06 (4H, m), 7.22 (2H, m), 8.00 (1H, t, *J* = 2.0 Hz), 8.18 (1H, d, *J* = 2.0 Hz), 8.96 (1H, d, *J* = 2.0 Hz).

<sup>13</sup>C NMR (125.75 MHz, C<sub>6</sub>D<sub>6</sub>): δ 20.0, 24.3, 27.5, 29.1, 29.3, 54.7, 56.7, 58.9, 75.8, 78.4, 95.1, 111.1, 118.9, 121.3, 121.8, 126.2, 127.7, 129.1, 129.5, 130.6, 132.3, 137.8, 138.3, 148.4, 150.8, 153.<sup>†</sup>

<sup>†</sup> 1 peak obscured.

HRMS (ES<sup>+</sup>): [C<sub>31</sub>H<sub>33</sub>N<sub>4</sub>]<sup>+</sup> ([M+H]<sup>+</sup>) requires 461.2700; found 461.2695.

(2*RS*,3*RS*)-1-Acetyl-3-phenyl-2-(5-(7-(pyrrolidin-1-yl)heptyl)pyridin-3-yl)indoline-3-carbonitrile **6**

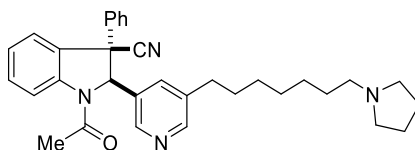

Indoline **6** was prepared according to general procedure 8, using indoline **4** (50 mg, 0.099 mmol) and Pd/C (wet degussa type, 5 mg). The reaction mixture was stirred under a H<sub>2</sub> atmosphere for 4.5 h. Purification by flash pressure column chromatography (5% MeOH/CH<sub>2</sub>Cl<sub>2</sub> + 0.5% aq. NH<sub>4</sub>OH) afforded indoline **6** as a colorless oil (37 mg, 0.073 mmol, 74%). The non-racemic forms of indoline **6** (e.r. > 99:1) were prepared from indolines (*R,R*)-**4** and (*S,S*)-**4**, following the same procedure.

<sup>1</sup>H NMR (400 MHz, C<sub>6</sub>D<sub>6</sub>): δ 0.98-1.17 (4H, m), 1.22-1.33 (4H, m), 1.38-1.55 (5H, m), 1.65 (4H, m), 2.09 (2H, t, *J* = 7.3 Hz), 2.36-2.48 (6H, m), 5.13 (1H, br. s), 6.74 (1H, td, *J* = 7.7 Hz, 0.9 Hz), 6.94-7.01 (3H, m), 7.03 (1H, d, *J* = 7.7 Hz), 7.10 (1H, t, *J* = 7.7 Hz), 7.20-7.28 (3H, m), 8.46 (1 H,d, *J* = 1.7 Hz), 8.50 (1H, d, *J* = 2.0 Hz), 8.69 (1H, br. s).

<sup>13</sup>C NMR (100.6 MHz, C<sub>6</sub>D<sub>6</sub>): δ 23.8, 24.3, 28.2, 29.6, 29.9, 29.9, 31.4, 33.1, 54.8, 57.0, 58.2, 74.5, 117.7, 119.1, 126.0, 126.3, 126.4, 129.4, 130.2, 131.3, 133.3, 133.7, 139.2, 141.1, 144.0, 146.6, 152.3, 168.5.<sup>‡</sup>

<sup>‡</sup> 1 peak obscured.

HRMS (ESI<sup>+</sup>, *m/z*): C<sub>33</sub>H<sub>39</sub>N<sub>4</sub>O<sup>+</sup> ([M+H]<sup>+</sup>) calc. 507.3118; found 507.3106.

[α]<sub>D</sub><sup>25.0</sup> (*S,S*) = -87 (*c* = 0.1, CHCl<sub>3</sub>).

Chiral HPLC: (Chiralpak ODH, 15% *i*PrOH, 85% hexane, 1.3 mL/min, λ = 254 nm, 20 μL injection):

τ<sub>R</sub> (*R,R*) = 8.7 min, τ<sub>R</sub> (*S,S*) = 11.4 min.

(2*SR*,3*RS*)-1-acetyl-3-phenyl-2-(5-(7-(pyrrolidin-1-yl)heptyl)furan-2-yl)indoline-3-carbonitrile **7**

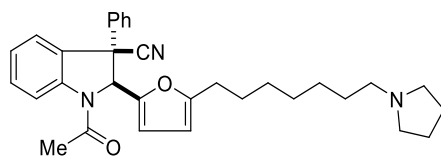

Indoline **7** was prepared according to general procedure 8, using indoline **132** (41 mg, 0.083 mmol) and Pd/C (wet degussa type, 4 mg) in MeOH (1.5 mL). The reaction mixture was stirred under a H<sub>2</sub> atmosphere for 4.5 h. Purification by flash pressure column chromatography (4.5% MeOH/CH<sub>2</sub>Cl<sub>2</sub> + 0.5% aq. NH<sub>4</sub>OH) afforded indoline **7** as a colorless oil (23 mg, 0.046 mmol, 56%).

<sup>1</sup>H NMR (500 MHz, C<sub>6</sub>D<sub>6</sub>, 348 K): δ 1.17-1.28 (4H, m), 1.33 (2H, quin, *J* = 7.4 Hz), 1.47-1.60 (7H, m), 1.64 (4H, m), 2.35-2.48 (8H, m), 5.23 (1H, br. s), 5.73 (1H, d, *J* = 3.3 Hz), 5.93 (1H, br. s), 6.75 (1H, td, *J* = 7.6 Hz, 0.9 Hz), 6.0-7.0 (3H, m), 7.04-7.15 (2H, m), 7.31 (2H, m), 8.77 (1H, br. s).

<sup>13</sup>C NMR (125.75 MHz, C<sub>6</sub>D<sub>6</sub>): δ 23.4, 24.3, 28.2, 28.5, 28.6, 29.7, 29.9, 30.0, 54.7, 57.0, 57.0, 71.2, 106.7, 110.2, 118.1, 119.0, 125.6, 126.0, 126.3, 129.2, 130.0, 130.9, 140.8, 143.6, 148.8, 158.7, 168.4. †

† 1 peak obscured.

HRMS (ESI<sup>+</sup>, *m/z*): [C<sub>32</sub>H<sub>38</sub>N<sub>3</sub>O<sub>2</sub>]<sup>+</sup> ([M+H]<sup>+</sup>) calc. 496.2959; found 496.2940.

(2*SR*,3*SR*)-1-Acetyl-3-phenyl-2-(5-(7-(pyrrolidin-1-yl)heptyl)furan-2-yl)indoline-3-carbonitrile **138**

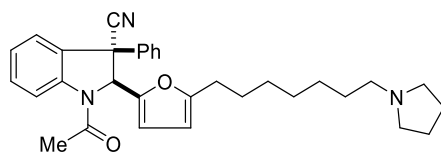

Indoline **138** was prepared according to general procedure 8, using indoline **133** (40 mg, 0.081 mmol) and Pd/C (wet degussa type, 4 mg) in MeOH (1.5 mL). The reaction mixture was stirred under a H<sub>2</sub> atmosphere for 1 h. Purification by flash pressure column chromatography (4% MeOH/CH<sub>2</sub>Cl<sub>2</sub> + 0.5% aq. NH<sub>4</sub>OH) afforded indoline **138** as a colorless oil (26 mg, 0.052 mmol, 64%).

**<sup>1</sup>H NMR (500 MHz, C<sub>6</sub>D<sub>6</sub>, 348 K):** δ 1.00 (2H, quin, *J* = 7.1 Hz), 1.04-1.22 (4H, m), 1.32 (2H, quin, *J* = 7.4 Hz), 1.50 (2H, quin, *J* = 7.4 Hz), 1.65 (4H, m), 1.74 (3H, s), 2.04 (2H, t, *J* = 7.4 Hz), 2.38-2.48 (6H, m), 5.38 (1H, d, *J* = 3.0 Hz), 5.60 (1H, d, *J* = 3.0 Hz), 5.70 (1H, s), 6.78 (1H, t, *J* = 7.7 Hz), 6.86 (1H, d, *J* = 7.7 Hz), 6.95-7.02 (3H, m), 7.14 (1H, t, *J* = 7.7 Hz), 7.24 (2H, app. d, *J* = 7.5 Hz), 8.54 (1H, br. s).

**<sup>13</sup>C NMR (125.75 MHz, C<sub>6</sub>D<sub>6</sub>):** δ 23.6, 24.5, 28.2, 28.2, 28.4, 29.7, 29.9, 29.9, 54.7, 55.6, 56.9, 70.6, 106.0, 110.9, 118.2, 121.4, 125.1, 126.3, 129.0, 129.0, 129.0, 131.1, 134.7, 145.1, 147.4, 157.9, 168.6. †

† 1 peak obscured.

**HRMS (ESI<sup>+</sup>, *m/z*):** [C<sub>32</sub>H<sub>38</sub>N<sub>3</sub>O<sub>2</sub>]<sup>+</sup> ([M+H]<sup>+</sup>) calc. 496.2959; found 496.2938.

(2*SR*,3*RS*)-1-Acetyl-3-phenyl-2-(4-(7-(pyrrolidin-1-yl)heptyl)furan-2-yl)indoline-3-carbonitrile **8**

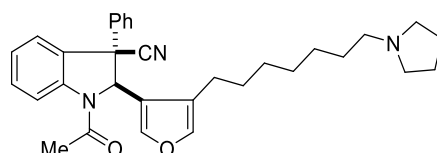

Indoline **8** was prepared according to general procedure 8, using indoline **134** (10 mg, 0.020 mmol) and Pd/C (wet degussa type, 1.5 mg) in MeOH (1.0 mL). The reaction mixture was stirred under a H<sub>2</sub> atmosphere for 16 h. Purification by flash pressure column chromatography (4% MeOH/CH<sub>2</sub>Cl<sub>2</sub> + 0.5% aq. NH<sub>4</sub>OH) afforded indoline **8** as a colorless oil (6.0 mg, 0.012 mmol, 60%).

**<sup>1</sup>H NMR (500 MHz, C<sub>6</sub>D<sub>6</sub>):** δ 1.14-1.25 (4H, m), 1.26-1.38 (4H, m), 1.48-1.59 (5H, m), 1.65 (4H, m), 2.06 (2H, t, *J* = 7.6 Hz), 2.39-2.46 (6H, m), 5.22 (1H, br. s), 6.01 (1H, br. s), 6.74 (1H, td, *J* = 7.6 Hz, 0.9 Hz), 6.91-6.98 (4H, m), 7.06-7.14 (2H, m), 7.31 (2H), 8.80 (1H, br. s).

**<sup>13</sup>C NMR (125.75 MHz, C<sub>6</sub>D<sub>6</sub>):** δ 23.4, 24.3, 25.2, 28.3, 29.9, 30.0, 30.0, 30.2, 54.8, 57.0, 57.0, 71.2, 110.8, 118.2, 118.9, 125.7, 126.1, 126.3, 127.3, 129.3, 130.1, 131.0, 140.4, 140.8, 143.7, 150.8, 168.4. †

‡ 1 peak obscured.

**HRMS (ESI<sup>+</sup>, *m/z*):** [C<sub>32</sub>H<sub>34</sub>N<sub>3</sub>O<sub>2</sub>]<sup>+</sup> ([M+H]<sup>+</sup>) calc. 492.2645; found 492.2638.

(2*RS*,3*RS*)-1-(2-cyanoacetyl)-3-phenyl-2-(5-(7-(pyrrolidin-1-yl)heptyl)pyridin-3-yl)indoline-3-carbonitrile **139**

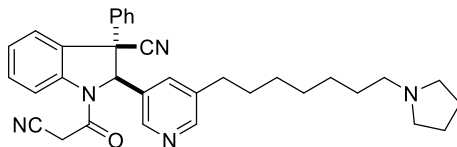

Indoline **139** was prepared according to general procedure 8 using indoline **135** (16 mg, 0.030 mmol) and Pd/C (wet degussa type, 2 mg) in MeOH (2 mL). The reaction mixture was stirred at rt under a H<sub>2</sub> atmosphere for 4 h. Purification by flash pressure column chromatography (4.5% MeOH/CH<sub>2</sub>Cl<sub>2</sub> + 0.5% aq. NH<sub>4</sub>OH) afforded indoline **139** as a colorless oil (14 mg, 0.026 mmol, 87%, contains minor impurities).

<sup>1</sup>H NMR (400 MHz, C<sub>6</sub>D<sub>6</sub>, 348 K): δ 1.12 (2H, quin, *J* = 7.5 Hz), 1.19 (2H, quin, *J* = 7.5 Hz), 1.27-1.41 (4H, m), 1.50 (2H, quin, *J* = 7.4 Hz), 1.65 (4H, m), 2.21 (2H, t, *J* = 7.6 Hz), 2.37-2.49 (8H, m), 5.12 (1H, br. s), 6.78 (1H, t, *J* = 7.6 Hz), 6.97-7.06 (4H, m), 7.09 (1H, t, *J* = 7.9 Hz), 8.23 (1H, br. s), 8.35 (1H, s), 8.49 (1H, s).<sup>†</sup>

<sup>13</sup>C NMR (100.6 MHz, C<sub>6</sub>D<sub>6</sub>, 348 K): δ 24.5, 26.8, 28.2, 29.5, 29.8, 29.9, 31.1, 33.2, 54.7, 56.9, 58.7, 74.5, 112.8, 117.8, 118.6, 126.3, 126.6, 127.1, 129.7, 130.4, 131.5, 132.5, 133.3, 139.5, 140.5, 143.0, 146.3, 153.0, 160.4.<sup>‡</sup>

<sup>†</sup> 3 peaks obscured.

<sup>‡</sup> 1 peak obscured.

HRMS (ES<sup>+</sup>): [C<sub>34</sub>H<sub>38</sub>N<sub>5</sub>O]<sup>+</sup> ([M+H]<sup>+</sup>) calc. 532.3071; found 532.3073.

(2*RS*,3*RS*)-1-(2-(1,3-dioxoisindolin-2-yl)acetyl)-3-phenyl-2-(5-(7-(pyrrolidin-1-yl)heptyl)pyridin-3-yl)indoline-3-carbonitrile **140**

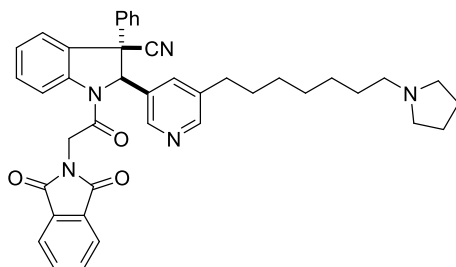



Indoline **140** was prepared according to general procedure 8, using indoline **136** (27 mg, 0.042 mmol) and Pd/C (wet degussa type, 3 mg) in MeOH (2.5 mL). The reaction mixture was stirred at rt under a H<sub>2</sub> atmosphere for 24 h. Purification by flash pressure column chromatography (4.5% MeOH/CH<sub>2</sub>Cl<sub>2</sub> + 0.5% aq. NH<sub>4</sub>OH) afforded indoline **140** as a colorless oil (17 mg, 0.026 mmol, 62%).

<sup>1</sup>H NMR (400 MHz, C<sub>6</sub>D<sub>6</sub>, 348 K): δ 1.13-1.28 (4H, m), 1.28-1.39 (2H, quin, *J* = 7.3 Hz), 1.40-1.56 (4H, m), 1.64 (4H, m), 2.28 (2H, t, *J* = 6.9 Hz), 2.36-2.49 (6H, m), 3.99 (1H, d, *J* = 16.4 Hz), 4.19 (1H, d, *J* = 16.4 Hz), 5.51 (1H, s), 6.76 (1H, t, *J* = 7.6 Hz), 6.88-6.96 (2H, m), 6.98-7.12 (5H, m), 7.32 (2H, app. d, *J* = 7.6 Hz), 7.36-7.45 (3H, m), 8.27 (1H, br. s), 8.47-8.58 (2H, m).

<sup>13</sup>C NMR (100.6 MHz, C<sub>6</sub>D<sub>6</sub>, 348 K): δ 24.4, 28.2, 29.6, 29.8, 30.0, 31.2, 33.3, 41.2, 54.7, 56.9, 59.0, 73.9, 117.9, 118.7, 123.6, 126.2, 126.3, 126.5, 129.4, 130.3, 130.4, 131.2, 132.9, 133.1, 133.5, 133.9, 139.4, 140.8, 143.4, 146.8, 152.6, 165.1, 167.5.

HRMS (ES<sup>+</sup>): [C<sub>41</sub>H<sub>42</sub>N<sub>5</sub>O<sub>3</sub>]<sup>+</sup> ([M+H]<sup>+</sup>) requires 652.3288; found 652.3281.

(2*RS*,3*RS*)-1-Glycyl-3-phenyl-2-(5-(7-(pyrrolidin-1-yl)heptyl)pyridin-3-yl)indoline-3-carbonitrile **12**

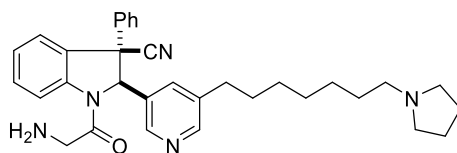

N<sub>2</sub>H<sub>4</sub>·H<sub>2</sub>O (7.0 μL, 0.13 mmol) was added dropwise to a solution of indoline **140** (17 mg, 0.026 mmol) in EtOH (2 mL) and stirred at 60 °C for 1 h. The mixture was filtered and concentrated. CH<sub>2</sub>Cl<sub>2</sub> was added to the remaining residue, the resulting precipitate was removed by filtration, and the filtrate was concentrated. This process was repeated 4 times. Purification by flash pressure column chromatography (5.5% MeOH/CH<sub>2</sub>Cl<sub>2</sub> + 0.5% aq. NH<sub>4</sub>OH) to afford indoline **12** as a pale yellow oil (9.4 mg, 0.018 mmol, 69%, contains minor impurities).

<sup>1</sup>H NMR (400 MHz, C<sub>6</sub>D<sub>6</sub>): δ 0.77 (3H, br. s, includes H<sub>2</sub>O), 1.05 (2H, quin, *J* = 7.2 Hz), 1.12 (2H, quin, *J* = 7.2 Hz), 1.28 (4H, m), 1.50 (2H, quin, *J* = 7.6 Hz), 1.65 (4H, m), 2.10 (2H, t, *J* = 7.5 Hz), 2.36-2.48 (6H, m), 2.72 (2H, br. s), 5.20 (1H, br. s), 6.73 (1H, td, *J* = 7.7 Hz, 1.0 Hz), 6.92-6.99 (3H, m), 7.03 (1H, dd, *J* = 7.7 Hz, 0.8 Hz), 7.10 (1H, t, *J* = 7.7 Hz), 7.19-7.24 (3H, m), 8.46 (1H, d, *J* = 1.8 Hz), 8.50 (1H, d, *J* = 2.0 Hz), 8.53 (1H, br. s).

<sup>13</sup>C NMR (100.6 MHz, C<sub>6</sub>D<sub>6</sub>): δ 24.3, 28.2, 29.5, 29.8, 30.0, 31.3, 33.1, 46.2, 54.8, 57.0, 58.4, 73.1, 117.6, 119.1, 126.2, 126.3, 126.5, 129.4, 130.2, 131.4, 133.3, 133.5, 139.2, 141.0, 143.9, 146.5, 152.4, 172.1. †

† 1 peak obscured.

HRMS (ES<sup>+</sup>): [C<sub>33</sub>H<sub>40</sub>N<sub>5</sub>O]<sup>+</sup> ([M+H]<sup>+</sup>) requires 522.3227; found 522.3227.

(2*RS*,3*RS*)-3-Phenyl-2-(5-(7-(pyrrolidin-1-yl)heptyl)pyridin-3-yl)indoline-3-carbonitrile **142**

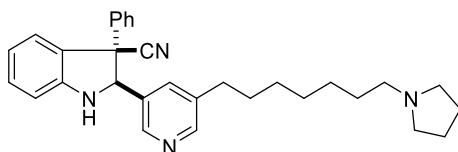

Indoline **142** was prepared according to general procedure 8 using indoline **137** (20 mg, 0.04 mmol) and Pd/C (degussa type, 2 mg) in MeOH (1.5 mL). The reaction mixture was stirred at rt under a H<sub>2</sub> atmosphere for 16 h. Purification by flash pressure column chromatography (5% MeOH/CH<sub>2</sub>Cl<sub>2</sub> + 0.5% aq. NH<sub>4</sub>OH) afforded indoline **142** as a colorless oil (14 mg, 0.029 mmol, 72%).

<sup>1</sup>H NMR (500 MHz, C<sub>6</sub>D<sub>6</sub>): δ 1.17-1.29 (4H, m), 1.35 (2H, quin, *J* = 7.5 Hz), 1.46-1.57 (4H, m), 1.63 (4H, m), 2.31-2.49 (8H, m), 3.31 (1H, d, *J* = 3.0 Hz), 4.45 (1H, d, *J* = 3.0 Hz), 6.47 (1H, d, *J* = 8.1 Hz), 6.61 (1H, td, *J* = 7.6 Hz, 0.9 Hz), 6.75 (1H, d, *J* = 7.6 Hz), 6.97-7.06 (4H, m), 7.28 (2H, m), 7.83 (1H, t, *J* = 2.0 Hz), 8.11 (1H, d, *J* = 2.0 Hz), 8.57 (1H, d, *J* = 2.0 Hz).

<sup>13</sup>C NMR (125.75 MHz, C<sub>6</sub>D<sub>6</sub>): δ 24.3, 28.1, 29.7, 29.8, 30.0, 31.7, 33.5, 54.8, 57.0, 59.1, 76.4, 111.1, 119.3, 121.3, 126.3, 127.9, 129.0, 129.4, 130.6, 132.1, 135.7, 138.0, 138.3, 147.8, 151.2, 151.8. †

† 1 peak obscured.

HRMS (ES<sup>+</sup>): [C<sub>31</sub>H<sub>37</sub>N<sub>4</sub>]<sup>+</sup> ([M+H]<sup>+</sup>) calc. 465.3013; found 465.3013.

(2*RS*,3*SR*)-1-Acetyl-2-(5-((7-bromoheptyl)oxy)pyridin-3-yl)-3-phenylindoline-3-carbonitrile **143**

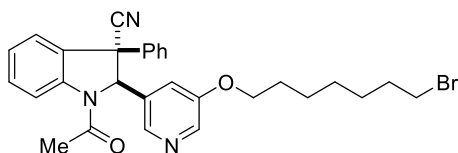

K<sub>2</sub>CO<sub>3</sub> (146 mg, 1.06 mmol) was added to a solution of indoline **110** (75 mg, 0.21 mmol) in acetone (15 mL), followed by 1,7-dibromoheptane (140 μL, 0.84 mmol). The mixture was stirred under reflux for 16 h, allowed to cool to rt, and concentrated. The remaining residue was dissolved in EtOAc, washed three times with H<sub>2</sub>O, then brine. The organic layer was dried over Na<sub>2</sub>SO<sub>4</sub>, filtered, and concentrated. Purification by flash pressure column chromatography (40% EtOAc/petroleum ether) afforded indoline **143** as a pale yellow oil (36 mg, 0.068 mmol, 32%, contains minor impurities).

<sup>1</sup>H NMR (500 MHz, C<sub>6</sub>D<sub>6</sub>, 348 K): δ 0.99 (2H, quin, *J* = 7.0 Hz), 1.07 (2H, quin, *J* = 7.0 Hz), 1.15 (2H, quin, *J* = 7.4 Hz), 1.33 (2H, quin, *J* = 7.4 Hz), 1.69 (3H, s), 3.00 (2H, t, *J* = 7.0 Hz), 3.33 (2H, app. m), 5.71 (1H, s), 6.36 (1H, s), 6.76 (1H, t, *J* = 7.7 Hz), 6.78-6.87 (4H, m), 7.02 (2H, app. d, *J* = 7.8 Hz), 7.11 (1H, td, *J* = 7.8 Hz, 1.3 Hz), 7.72 (1H, s), 8.08 (1H, d, *J* = 2.4 Hz), 8.32 (1H, br. s).

<sup>13</sup>C NMR (125.75 MHz, C<sub>6</sub>D<sub>6</sub>, 348 K): δ 23.7, 25.9, 28.2, 28.5, 29.1, 32.9, 33.1, 55.8, 68.5, 73.2, 117.4, 119.6, 121.3, 125.2, 126.3, 128.6, 128.9, 129.0, 131.1, 132.8, 133.9, 138.6, 141.3, 144.8, 155.2, 168.2. †

† 1 peak obscured.

HRMS (ES<sup>+</sup>): [C<sub>29</sub>H<sub>31</sub><sup>79</sup>BrN<sub>3</sub>O<sub>3</sub>]<sup>+</sup> ([M+H]<sup>+</sup>) calc. 532.1594; found 532.1592. [C<sub>29</sub>H<sub>31</sub><sup>81</sup>BrN<sub>3</sub>O<sub>3</sub>]<sup>+</sup> ([M+H]<sup>+</sup>) calc. 534.1574; found 534.1571.

(2*RS*,3*RS*)-1-Acetyl-2-(5-((7-bromoheptyl)oxy)pyridin-3-yl)-3-phenylindoline-3-carbonitrile **144**

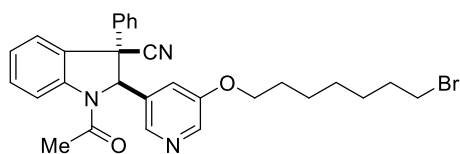

K<sub>2</sub>CO<sub>3</sub> (214 mg, 1.55 mmol) was added to a solution of indoline **17** (110 mg, 0.31 mmol) in acetone (20 mL), followed by 1,7-dibromoheptane (0.20 mL, 1.2 mmol). The mixture was stirred under reflux for 8 h, allowed to cool to rt, and concentrated. The remaining residue was dissolved in EtOAc, washed three times with H<sub>2</sub>O, then brine. The organic layer was dried over Na<sub>2</sub>SO<sub>4</sub>, filtered, and concentrated. Purification by flash pressure column chromatography (40% EtOAc/petroleum ether) afforded indoline **144** as a pale yellow oil (63 mg, 0.12 mmol, 38%, contains minor impurities). The non-racemic forms of indoline **144** were prepared from (*R,R*)-**17** and (*S,S*)-**17**, following an identical protocol.

<sup>1</sup>H NMR (500 MHz, C<sub>6</sub>D<sub>6</sub>, 348 K): δ 0.96 (2H, quin, *J* = 7.2 Hz), 1.04 (2H, quin, *J* = 7.5 Hz), 1.10 (2H, quin, *J* = 7.5 Hz), 1.35 (2H, quin, *J* = 7.4 Hz), 1.44-1.57 (5H, m), 2.99 (2H, t, *J* = 6.8 Hz), 3.47 (2H, app. td, *J* = 6.7 Hz, 1.6 Hz), 5.23 (1H, s), 6.76 (1H, td, *J* = 7.7 Hz, 0.9 Hz), 6.96-7.03 (3H, m), 7.04 (1H, t, *J* = 2.2 Hz), 7.06 (1H, d, *J* = 7.6 Hz), 7.10 (1H, td, *J* = 7.9 Hz, 1.2 Hz), 7.24 (2H, m), 8.28 (1H, d, *J* = 1.9 Hz), 8.38 (1H, br. s), 8.43 (1H, d, *J* = 2.5 Hz).

<sup>13</sup>C NMR (125.75 MHz, C<sub>6</sub>D<sub>6</sub>, 348 K): δ 23.7, 26.0, 28.4, 28.8, 29.3, 33.1, 34.0, 58.1, 68.5, 74.2, 117.6, 118.6, 119.1, 126.0, 126.2, 126.4, 129.4, 130.2, 131.3, 134.8, 139.8, 140.9, 141.2, 143.8, 156.2, 168.4. †

† 1 peak obscured.

HRMS (ES<sup>+</sup>): [C<sub>29</sub>H<sub>31</sub><sup>79</sup>BrN<sub>3</sub>O<sub>2</sub>]<sup>+</sup> ([M+H]<sup>+</sup>) calc. 532.1594; found 532.1580. [C<sub>29</sub>H<sub>31</sub><sup>81</sup>BrN<sub>3</sub>O<sub>2</sub>]<sup>+</sup> ([M+H]<sup>+</sup>) calc. 534.1574; found 534.1562.

[α]<sub>D</sub><sup>25.0</sup> (*R,R*) = +26 (*c* = 0.1, CHCl<sub>3</sub>); [α]<sub>D</sub><sup>25.0</sup> (*S,S*) = -34 (*c* = 0.1, CHCl<sub>3</sub>).

(2*R,S*,3*S*)-1-Acetyl-3-phenyl-2-(5-((7-(pyrrolidin-1-yl)heptyl)oxy)pyridin-3-yl)indoline-3-carbonitrile **145**

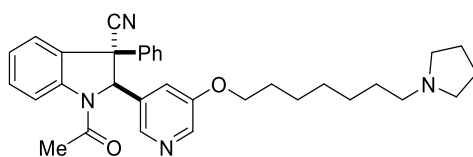

K<sub>2</sub>CO<sub>3</sub> (29 mg, 0.21 mmol) was added to a solution of indoline **143** (22 mg, 0.04 mmol) in acetonitrile (3.0 mL), followed by pyrrolidine (14 μL, 0.17 mmol). The mixture was stirred at 60 °C for 2.5 h. H<sub>2</sub>O was added, and the mixture was extracted with EtOAc. The combined organic extracts were washed with brine, dried over Na<sub>2</sub>SO<sub>4</sub>, filtered, and concentrated. Purification by flash pressure column chromatography (4.5-5% MeOH/CH<sub>2</sub>Cl<sub>2</sub> + 0.5% aq. NH<sub>4</sub>OH) afforded indoline **145** as a colorless oil (14 mg, 0.027 mmol, 65%).

<sup>1</sup>H NMR (500 MHz, C<sub>6</sub>D<sub>6</sub>, 348 K): δ 1.15-1.23 (4H, m), 1.32 (2H, quin, *J* = 6.9 Hz), 1.39 (2H, quin, *J* = 6.8 Hz), 1.50 (2H, quin, *J* = 7.3 Hz), 1.61-1.69 (7H, m), 2.39-2.46 (6H, m), 3.32 (2H, app. m), 5.67 (1H, br. s), 6.32 (1H, br. s), 6.74 (1H, td, *J* = 7.7 Hz, 1.0 Hz), 6.77-6.86 (4H, m, *H*<sub>4</sub>), 7.01 (2H, app. d, *J* = 7.3 Hz), 7.10 (1H, td, *J* = 7.7 Hz, 1.2 Hz), 7.72 (1H, br. s), 8.09 (1H, d, *J* = 2.8 Hz), 8.36 (1H, br. s).

<sup>13</sup>C NMR (125.75 MHz, C<sub>6</sub>D<sub>6</sub>, 348 K): δ 24.1, 24.3, 26.5, 28.1, 29.5, 29.8, 29.9, 54.8, 55.8, 56.9, 68.5, 73.0, 117.7, 119.6, 121.7, 125.6, 126.6, 129.0, 129.2, 129.2, 131.5, 132.9, 133.9, 138.7, 141.1, 144.9, 155.4, 168.6. ‡

‡ 1 peak obscured.

**HRMS (ES<sup>+</sup>):** [C<sub>33</sub>H<sub>39</sub>N<sub>4</sub>O<sub>2</sub>]<sup>+</sup> ([M+H]<sup>+</sup>) calc. 523.3068; found 523.3068.

(2*RS*,3*SR*)-1-Acetyl-3-phenyl-2-(5-((7-(pyrrolidin-1-yl)heptyl)oxy)pyridin-3-yl)indoline-3-carbonitrile **3**

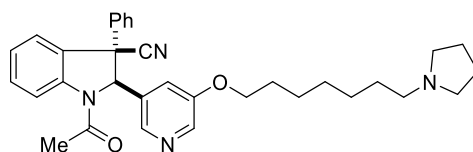

K<sub>2</sub>CO<sub>3</sub> (58 mg, 0.42 mmol) was added to a solution of indoline **144** (45 mg, 0.085 mmol) in acetonitrile (6 mL), followed by pyrrolidine (28 μL, 0.34 mmol). The mixture was stirred at 60 °C for 3 h. H<sub>2</sub>O was added, and the mixture was extracted with EtOAc. The combined organic extracts were washed with brine, dried over Na<sub>2</sub>SO<sub>4</sub>, filtered, and concentrated. Purification by flash pressure column chromatography (5% MeOH/CH<sub>2</sub>Cl<sub>2</sub> + 0.5% aq. NH<sub>4</sub>OH) afforded indoline **3** as a colorless oil (24 mg, 0.046 mmol, 54%). The non-racemic forms of indoline **3** were prepared from (*R,R*)-**3** and (*S,S*)-**3**, following an identical protocol (e.r. > 99:1).

<sup>1</sup>H NMR (500 MHz, C<sub>6</sub>D<sub>6</sub>, 348 K): δ 1.18 (4H, m), 1.29 (2H, quin, *J* = 7.1 Hz), 1.43 (2H, quin, *J* = 6.8 Hz), 1.46-1.54 (5H, m), 1.65 (4H, m), 2.37-2.48 (6H, m), 3.50 (2H, app. td, *J* = 6.4 Hz, 1.7 Hz), 5.22 (1H, br. s), 6.76 (1H, td, *J* = 7.6 Hz, 0.9 Hz), 6.96-7.04 (4H, m), 7.05-7.13 (2H, m), 7.24 (2H, m), 8.28 (1H, d, *J* = 1.2 Hz), 8.39 (1H, br. s), 8.42 (1H, d, *J* = 2.5 Hz).

<sup>13</sup>C NMR (125.75 MHz, C<sub>6</sub>D<sub>6</sub>): δ 23.8, 24.3, 26.4, 28.1, 29.6, 29.8, 30.0, 54.8, 56.9, 58.2, 68.7, 74.3, 117.6, 118.7, 119.2, 126.0, 126.3, 126.4, 128.7, 129.4, 130.2, 131.3, 134.8, 139.9, 141.0, 141.1, 143.9, 156.3, 168.5.

**HRMS (ES<sup>+</sup>):** [C<sub>33</sub>H<sub>39</sub>N<sub>4</sub>O<sub>2</sub>]<sup>+</sup> ([M+H]<sup>+</sup>) calc. 523.3068; found 523.3063.

[α]<sub>D</sub><sup>25.0</sup> (*R,R*) = +57 (*c* = 0.1, CHCl<sub>3</sub>); [α]<sub>D</sub><sup>25.0</sup> (*S,S*) = -48 (*c* = 0.1, CHCl<sub>3</sub>).

**Chiral HPLC:** (Chiralpak ODH, 15% *i*PrOH, 85% hexane, 1.3 mL/min, λ = 254 nm, 20 μL)

τ<sub>R</sub> (*R,R*) = 11.8 min, τ<sub>R</sub> (*S,S*) = 16.7 min.

(2*RS*,3*RS*)-1-Acetyl-2-(5-((7-(dimethylamino)heptyl)oxy)pyridin-3-yl)-3-phenylindoline-3-carbonitrile **146**

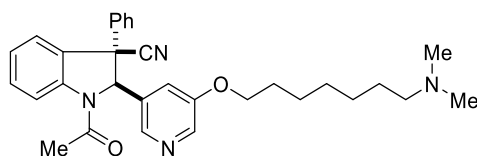

Dimethylamine hydrochloride (20 mg, 0.23 mmol) was added to a solution of indoline **144** (30 mg, 0.056 mmol) in acetonitrile, followed by  $K_2CO_3$  (40 mg, 0.28 mmol). The mixture was stirred 50 °C for 4.5 h.  $H_2O$  was added, and the mixture was extracted with EtOAc. The combined organic extracts were washed with brine, dried over  $Na_2SO_4$ , filtered, and concentrated. Purification by flash pressure column chromatography (5% MeOH/ $CH_2Cl_2$  + 0.5% aq.  $NH_4OH$ ) afforded indoline **146** as a colorless oil (19 mg, 0.038 mmol, 68%).

$^1H$  NMR (500 MHz,  $C_6D_6$ , 348 K):  $\delta$  1.11-1.21 (4H, m), 1.25 (2H, quin,  $J = 7.5$  Hz), 1.40 (2H, quin,  $J = 7.2$  Hz), 1.46 (2H, quin,  $J = 7.3$  Hz), 1.54 (3H, s), 2.13 (6H, s), 2.18 (2H, t,  $J = 7.1$  Hz), 3.54 (2H, t,  $J = 6.5$  Hz), 5.24 (1H, s), 6.77 (1H, t,  $J = 7.6$  Hz), 6.95-7.05 (4H, m), 7.06-7.13 (2H, m), 7.24 (2H, app. d,  $J = 7.6$  Hz), 8.27 (1H, s), 8.35 (1H, br. s), 8.42 (1H, d,  $J = 2.2$  Hz).

$^{13}C$  NMR (125.75 MHz,  $C_6D_6$ ):  $\delta$  23.7, 26.5, 28.0, 28.4, 29.6, 29.9, 45.9, 58.3, 60.4, 69.2, 74.8, 117.7, 119.1, 119.2, 125.9, 126.3, 126.4, 129.4, 130.0, 130.2, 131.3, 134.8, 140.4, 141.3, 141.3, 144.1, 156.5, 168.3.

HRMS ( $ES^+$ ):  $[C_{31}H_{37}N_4O_2]^+$  ( $[M+H]^+$ ) calc. 497.2911; found 497.2909.

(2*RS*,3*RS*)-1-Acetyl-2-(5-(2-(2-(2-bromoethoxy)ethoxy)ethoxy)pyridin-3-yl)-3-phenylindoline-3-carbonitrile **147**

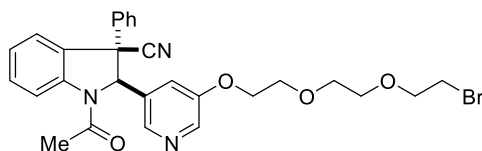

$K_2CO_3$  (272 mg, 1.97 mmol) was added to a solution of indoline **17** (140 mg, 0.39 mmol), followed by 1,2-bis(2-bromoethoxy)ethane (410 mg, 1.58 mmol). The mixture was stirred at 50 °C for 2 h, allowed to cool to rt, and concentrated. The remaining residue was dissolved in EtOAc, washed three times with  $H_2O$ , then brine. The organic layer was dried over  $Na_2SO_4$ , filtered, and concentrated. Purification by flash pressure column

chromatography (3.5% MeOH/CH<sub>2</sub>Cl<sub>2</sub>) afforded indoline **147** as an orange paste (80 mg, 0.15 mmol, 37%, contains minor impurities).

<sup>1</sup>H NMR (500 MHz, C<sub>6</sub>D<sub>6</sub>, 348 K): δ 1.53 (3H, s), 3.06 (2H, t, *J* = 6.3 Hz), 3.24-3.33 (4H, m), 3.35 (2H, app. s), 3.41 (2H, t, *J* = 6.3 Hz), 3.65 (2H, app. m), 5.22 (1H, s), 6.77 (1H, t, *J* = 7.6 Hz), 6.95-7.04 (3H, m), 7.04-7.08 (2H, m), 7.11 (1H, t, *J* = 7.8 Hz), 7.23 (2H, app. d, *J* = 7.7 Hz), 8.26 (1H, app. s), 8.33 (1H, br. s), 8.41 (1H, d, *J* = 2.3 Hz).

<sup>13</sup>C NMR (125.75 MHz, C<sub>6</sub>D<sub>6</sub>): δ 23.7, 31.0, 58.1, 68.2, 69.9, 70.9, 71.2, 71.6, 74.2, 117.6, 119.1, 119.2, 125.9, 126.2, 126.2, 129.3, 130.1, 131.2, 134.7, 139.8, 141.0, 141.3, 143.8, 156.1, 168.4.

HRMS (ES<sup>+</sup>): [C<sub>28</sub>H<sub>29</sub><sup>79</sup>BrN<sub>3</sub>O<sub>4</sub>]<sup>+</sup> ([M+H]<sup>+</sup>) calc. 550.1336; found 550.1326. [C<sub>28</sub>H<sub>29</sub><sup>81</sup>BrN<sub>3</sub>O<sub>4</sub>]<sup>+</sup> ([M+H]<sup>+</sup>) calc. 552.1316; found 552.1308.

(2*RS*,3*RS*)-1-Acetyl-3-phenyl-2-(5-(2-(2-(2-(pyrrolidin-1-yl)ethoxy)ethoxy)ethoxy)pyridin-3-yl)indoline-3-carbonitrile **148**

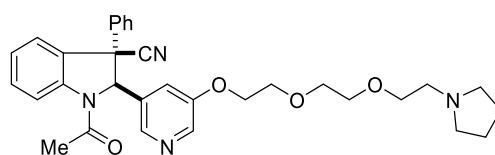

K<sub>2</sub>CO<sub>3</sub> (63 mg, 0.45 mmol) was added to a solution of indoline **147** (50 mg, 0.091 mmol) in acetonitrile (6 mL), followed by pyrrolidine (30 μL, 0.36 mmol). The mixture was stirred at 60 °C for 3 h. H<sub>2</sub>O was added, and the mixture was extracted with EtOAc. The combined organic extracts were washed with brine, dried over Na<sub>2</sub>SO<sub>4</sub>, filtered, and concentrated. Purification by flash pressure column chromatography (5% MeOH/CH<sub>2</sub>Cl<sub>2</sub> + 0.5% aq. NH<sub>4</sub>OH) afforded indoline **148** as a pale yellow oil (38 mg, 0.070 mmol, 77%).

<sup>1</sup>H NMR (500 MHz, C<sub>6</sub>D<sub>6</sub>, 348 K): δ 1.55 (3H, s), 1.56-1.64 (4H, m), 2.46 (4H, m), 2.63 (2H, t, *J* = 6.0 Hz), 3.36-3.47 (6H, m), 3.51 (2H, t, *J* = 6.0 Hz), 3.69 (2H, app. m), 5.24 (1H, s), 6.78 (1H, t, *J* = 7.4 Hz), 6.96-7.09 (5H, m), 7.12 (1H, t, *J* = 8.0 Hz), 7.24 (2H, m), 8.26 (1H, app. s), 8.33 (1H, br. s), 8.41 (1H, d, *J* = 2.8 Hz).

<sup>13</sup>C NMR (125.75 MHz, C<sub>6</sub>D<sub>6</sub>, 348 K): δ 23.7, 24.5, 55.1, 56.4, 58.3, 68.9, 70.1, 71.2, 71.5, 71.6, 74.7, 117.7, 119.1, 119.7, 125.9, 126.3, 126.4, 129.4, 129.9, 130.2, 131.3, 134.8, 140.5, 141.3, 141.5, 144.0, 156.3, 168.3.

HRMS (ESI<sup>+</sup>, *m/z*): [C<sub>32</sub>H<sub>37</sub>N<sub>4</sub>O<sub>4</sub>]<sup>+</sup> ([M+H]<sup>+</sup>) calc. 541.2809; found 541.2788.

(2*RS*,3*RS*)-1-Acetyl-2-(5-((*Z*)-7-hydroxyhept-1-en-1-yl)pyridin-3-yl)-3-phenylindoline-3-carbonitrile **149**

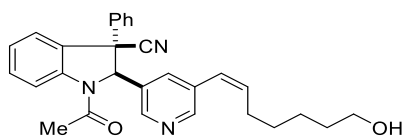

Indoline **149** was prepared according to a modified literature procedure.<sup>17</sup> InCl<sub>3</sub> (66 mg, 0.30 mmol) was dissolved in THF (0.9 mL) and cooled to -78 °C. DIBAL-H (1.0 M in hexanes, 0.28 mL, 0.28 mmol) was added and stirred at -78 °C for 45 min. A solution of 6-heptyn-1-ol (22 mg, 0.2 mmol) in THF (0.6 mL) was added, followed by Et<sub>3</sub>B (1.0 M in hexanes, 0.19 mL, 0.19 mmol), and the mixture was stirred at -78 °C for 4 h. The reaction was allowed to warm to rt, and a solution of indoline **94** (110 mg, 0.26 mmol) in DMF (0.9 mL) was added, followed by a solution of Pd(PPh<sub>3</sub>)<sub>4</sub> in THF (4.6 mM, 0.35 mL, 0.0016 mmol). The reaction mixture was stirred at 60 °C for 7 h, then diluted with EtOAc, washed with NaHCO<sub>3</sub> (saturated aq.), and extracted with EtOAc. The combined organic extracts were washed with brine, dried over Na<sub>2</sub>SO<sub>4</sub>, filtered, and concentrated. Purification by flash pressure column chromatography (3.5% MeOH/CH<sub>2</sub>Cl<sub>2</sub>) afforded indoline **149** as a colorless oil (42 mg, 0.093 mmol, 58%, contains minor impurities).

<sup>1</sup>H NMR (500 MHz, C<sub>6</sub>D<sub>6</sub>, 348 K): δ 0.94 (1H, t, *J* = 5.5 Hz, OH), 1.13-1.24 (4H, m), 1.33 (2H, quin, *J* = 6.7 Hz), 1.52 (3H, s), 2.02 (2H, app. q, *J* = 7.4 Hz), 3.38 (2H, app. q, *J* = 6.3 Hz), 5.24 (1H, s), 5.53 (1H, dt, *J* = 11.7 Hz, 7.6 Hz), 6.07 (1H, d, *J* = 11.7 Hz), 6.80 (1H, t, *J* = 7.6 Hz), 6.96-7.05 (3H, m), 7.08 (1H, d, *J* = 7.6 Hz), 7.14 (1H, m), 7.24 (2H, m), 7.42 (1H, s), 8.34 (1H, br. s), 8.46 (1H, s), 8.59 (1H, s).

<sup>13</sup>C NMR (125.75 MHz, C<sub>6</sub>D<sub>6</sub>, 348 K): δ 23.7, 26.1, 29.0, 30.0, 33.3, 58.3, 63.0, 74.8, 117.7, 119.1, 125.6, 126.0, 126.3, 126.5, 129.4, 129.9, 130.2, 131.3, 133.2, 133.7, 134.7, 136.9, 141.2, 144.0, 147.1, 152.2, 168.3.

HRMS (ES<sup>+</sup>): [C<sub>29</sub>H<sub>30</sub>N<sub>3</sub>O<sub>2</sub>]<sup>+</sup> ([M+H]<sup>+</sup>) calc. 452.2333; found 452.2326.



(Z)-7-(5-((2*RS*,3*RS*)-1-acetyl-3-cyano-3-phenylindolin-2-yl)pyridin-3-yl)hept-6-en-1-yl 4-methylbenzenesulfonate

**150**

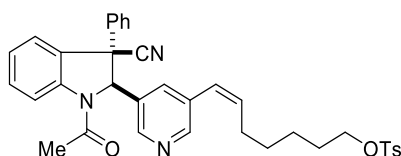

*p*-Toluenesulfonyl chloride (38 mg, 0.20 mmol) was added to a solution of indoline **149** (30 mg, 0.066 mmol) and pyridine (32  $\mu$ L, 0.41 mmol) in  $\text{CH}_2\text{Cl}_2$  (5 mL) at 0  $^\circ\text{C}$ . The reaction mixture was stirred at 0  $^\circ\text{C}$  for 10 min, allowed to warm to rt, and stirred for a further 20 h.  $\text{H}_2\text{O}$  (5 ml) was added, and the mixture was extracted 3 times with  $\text{CH}_2\text{Cl}_2$ . The combined organic extracts were washed with  $\text{H}_2\text{O}$ , then brine, dried over  $\text{Na}_2\text{SO}_4$ , filtered, and concentrated. Purification by flash pressure column chromatography (55% EtOAc/petroleum ether) afforded indoline **150** as a colorless oil (41 mg, 0.068 mmol, 95%).

$^1\text{H NMR}$  (500 MHz,  $\text{C}_6\text{D}_6$ , 348 K):  $\delta$  0.93-1.11 (4H, m), 1.32 (2H, quin,  $J = 6.9$  Hz), 1.53 (3H, s), 1.86-1.95 (5H, m), 3.88 (2H, t,  $J = 6.5$  Hz), 5.25 (1H, s), 5.42 (1H, dt,  $J = 11.5$  Hz, 7.4 Hz), 6.04 (1H, d,  $J = 11.5$  Hz), 6.76-6.88 (3H, m), 6.97-7.06 (3H, m), 7.10 (1H, d,  $J = 7.6$  Hz), 7.13-7.18 (1H, obscured), 7.24 (2H, app. d,  $J = 8.2$  Hz), 7.38 (1H, app. s), 7.77 (2H, app. d,  $J = 8.2$  Hz), 8.32 (1H, br. s), 8.46 (1H, d,  $J = 1.9$  Hz), 8.56 (1H, d,  $J = 1.6$  Hz).

$^{13}\text{C NMR}$  (125.75 MHz,  $\text{C}_6\text{D}_6$ , 348 K):  $\delta$  21.4, 23.7, 25.6, 28.8, 29.4, 29.5, 58.3, 70.5, 74.7, 117.6, 119.1, 125.8, 126.0, 126.3, 126.5, 129.4, 130.2, 130.2, 131.3, 133.2, 133.7, 134.5, 135.7, 136.4, 141.2, 144.0, 144.4, 147.2, 152.1, 168.2.<sup>‡</sup>

<sup>‡</sup> 2 peaks obscured.

**HRMS (ES<sup>+</sup>):** [ $\text{C}_{36}\text{H}_{36}\text{N}_3\text{O}_4^{32}\text{S}$ ]<sup>+</sup> ([M+H]<sup>+</sup>) calc. 606.2421; found 606.2414.

(2*RS*,3*RS*)-1-Acetyl-3-phenyl-2-(5-((*Z*)-7-(pyrrolidin-1-yl)hept-1-en-1-yl)pyridin-3-yl)indoline-3-carbonitrile **152**

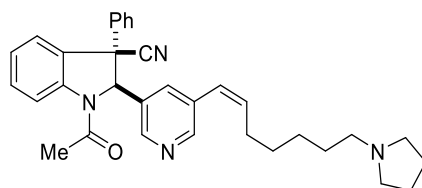

Pyrrolidine (23  $\mu$ L, 0.3 mmol) was added to a solution of indoline **150** (17 mg, 0.028 mmol) in  $\text{CH}_3\text{CN}$  (2 mL). The reaction mixture was stirred at 50  $^\circ\text{C}$  for 1 h, then allowed to cool to rt and diluted with EtOAc. The solution was washed twice with  $\text{H}_2\text{O}$ , then with brine. The organic layer was dried over  $\text{Na}_2\text{SO}_4$ , filtered, and concentrated. Purification by flash pressure column chromatography (5% MeOH/ $\text{CH}_2\text{Cl}_2$  + 0.5% aq.  $\text{NH}_4\text{OH}$ ) to afford indoline **152** as a colorless oil (9.2 mg, 0.018 mmol, 64%).

$^1\text{H NMR}$  (500 MHz,  $\text{C}_6\text{D}_6$ , 348 K):  $\delta$  1.22-1.33 (4H, m), 1.45 (2H, quin,  $J = 7.1$  Hz), 1.52 (3H, s), 1.64 (4H, m), 2.07 (2H, app. q,  $J = 7.0$  Hz), 2.38 (2H, t,  $J = 7.3$  Hz), 2.43 (4H, m), 5.23 (1H, s), 5.57 (1H, dt,  $J = 11.7$  Hz, 7.4 Hz), 6.07 (1H, d,  $J = 11.7$  Hz), 6.81 (1H, t,  $J = 7.6$  Hz), 6.94-7.06 (3H, m), 7.10 (1H, d,  $J = 7.6$  Hz), 7.13-7.18 (1H, obscured), 7.25 (2H, m), 7.43 (1H, app. s), 8.36 (1H, br. s), 8.46 (1H, d,  $J = 1.9$  Hz), 8.61 (1H, d,  $J = 1.5$  Hz).

$^{13}\text{C NMR}$  (125.75 MHz,  $\text{C}_6\text{D}_6$ , 348 K):  $\delta$  23.7, 24.5, 27.9, 29.3, 29.7, 30.4, 54.7, 56.9, 58.3, 74.8, 117.7, 119.1, 125.5, 125.9, 126.3, 126.4, 129.4, 129.9, 130.2, 131.3, 133.2, 133.7, 134.7, 137.0, 141.3, 144.1, 147.1, 152.2, 168.2.

**HRMS (ES $^+$ )**: [ $\text{C}_{33}\text{H}_{37}\text{ON}_4$ ] $^+$  ( $[\text{M}+\text{H}]^+$ ) requires 505.2962; found 505.2961.

(2*RS*,3*SR*)-1-Acetyl-3-phenyl-2-(5-((*E*)-7-(pyrrolidin-1-yl)hept-1-en-1-yl)pyridin-3-yl)-2,3-dihydro-1H-pyrrolo[3,2-*b*]pyridine-3-carbonitrile **153**

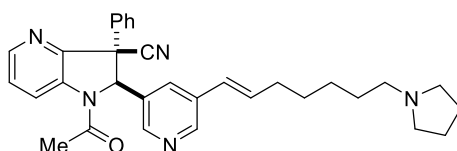

Indoline **153** was prepared according to general procedure 6 using indoline **112** (30 mg, 0.072 mmol), vinyl stannane **129** (42 mg, 0.093 mmol), and  $\text{Pd}(\text{PPh}_3)_4$  (8 mg, 0.007 mmol) in NMP (1.5 mL). The reaction mixture was stirred at 85  $^\circ\text{C}$  for 1.5 h. Purification by flash pressure column chromatography (4.5% MeOH/ $\text{CH}_2\text{Cl}_2$  + 0.5% aq.  $\text{NH}_4\text{OH}$ ) afforded indoline **153** as a pale yellow oil (20 mg, 0.040 mmol, 55%).

<sup>1</sup>H NMR (400 MHz, C<sub>6</sub>D<sub>6</sub>, 348 K): δ 1.28-1.36 (4H, m), 1.44-1.53 (5H, m), 1.64 (4H, m), 1.96 (2H, app. br. s), 2.39 (2H, t, *J* = 7.2 Hz), 2.43 (4H, m), 5.29 (1H, s), 5.98-6.08 (2H, m),<sup>†</sup> 6.70 (1H, dd, *J* = 8.2 Hz, 4.8 Hz), 6.95-7.05 (3H, m), 7.31 (2H, m), 7.35 (1H, app. s), 8.03 (1H, dd, *J* = 4.8 Hz, 1.3 Hz), 8.38 (1H, d, *J* = 2.0 Hz), 8.44 (1H, br. s), 8.66 (1H, d, *J* = 1.8 Hz).

<sup>†</sup> <sup>1</sup>H NMR (400 MHz, C<sub>6</sub>D<sub>6</sub>): δ 5.98 (1H, dt, *J* = 16.0 Hz, 6.5 Hz), 5.88 (1H, d, *J* = 16.0 Hz).

<sup>13</sup>C NMR (100.6 MHz, C<sub>6</sub>D<sub>6</sub>, 348 K): δ 23.3, 24.5, 27.9, 29.5, 29.6, 33.6, 54.7, 56.7, 59.6, 73.2, 118.0, 124.3, 124.9, 126.3, 126.7, 129.4, 130.2, 130.6, 133.6, 134.8, 135.4, 138.0, 140.2, 147.0, 147.2, 150.0, 169.0.<sup>‡</sup>

<sup>‡</sup> 1 peak obscured.

HRMS (ES<sup>+</sup>): [C<sub>23</sub>H<sub>36</sub>N<sub>5</sub>O]<sup>+</sup> ([M+H]<sup>+</sup>) calc. 506.2914; found 506.2914.

(2*RS*,3*RS*)-1-Acetyl-2-(5-((*E*)-7-(pyrrolidin-1-yl)hept-1-en-1-yl)pyridin-3-yl)-3-(thiazol-2-yl)indoline-3-carbonitrile

**11**

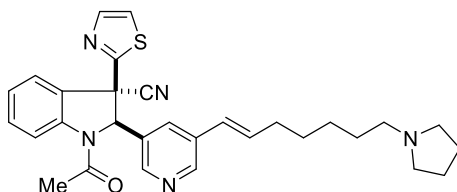

Indoline **11** was prepared according to general procedure 6 using indoline **102** (40 mg, 0.094 mmol), vinyl stannane **129** (55 mg, 0.12 mmol), and Pd(PPh<sub>3</sub>)<sub>4</sub> (14 mg, 0.012 mmol) in NMP (1.5 mL). The reaction mixture was stirred at 85 °C for 2 h. Purification by flash pressure column chromatography (4.5% MeOH/CH<sub>2</sub>Cl<sub>2</sub> + 0.5% aq. NH<sub>4</sub>OH) afforded indoline **11** as a pale yellow oil (29 mg, 0.057 mmol, 60%).

<sup>1</sup>H NMR (500 MHz, C<sub>6</sub>D<sub>6</sub>): 1.27 (4H, m), 1.38-1.55 (5H, m), 1.64 (4H, m), 1.88 (2H, app. q, *J* = 6.8 Hz), 2.32-2.44 (6H, m), 5.78 (1H, d, *J* = 16.0 Hz), 5.83 (1H, br. s), 5.88 (1H, dt, *J* = 16.0 Hz, 6.5 Hz), 6.20 (1H, d, *J* = 3.3 Hz), 6.71 (1H, td, *J* = 7.6 Hz, 0.9 Hz), 6.93 (1H, d, *J* = 7.9 Hz), 6.97 (1H, br. s), 7.07 (1H, t, *J* = 7.7 Hz), 7.33 (1H, d, *J* = 3.3 Hz), 8.09 (1H, s), 8.37 (1H, d, *J* = 2.0 Hz), 8.68 (1H, br. s).

<sup>13</sup>C NMR (125.75 MHz, C<sub>6</sub>D<sub>6</sub>): 24.0, 24.3, 27.8, 29.6, 29.6, 33.7, 54.3, 54.7, 56.8, 72.7, 118.0, 119.8, 121.9, 125.6, 126.2, 126.7, 131.1, 131.5, 132.4, 133.5, 134.8, 143.8, 144.8, 147.3, 148.7, 163.6, 168.5.<sup>†</sup>

<sup>†</sup> 1 peak obscured.

HRMS ( $ES^+$ ):  $[C_{30}H_{34}N_5O^{32}S]^+$  ( $[M+H]^+$ ) calc. 512.2479; found 512.2478.

### III) Biological Activity Assays

#### 3.1 AlphaScreen and Rapidfire assays

Recombinant KDM2A (1-517) containing the JmjC domain only was expressed and purified from *E. coli* [22], and used for all *in vitro* assays. AlphaScreen demethylation assays for KDM2A, KDM3A, KDM4A/C, KDM5A/B/C, KDM6B, KDM7B were carried out as described, using 2OG concentrations at approximately at  $K_M$  values of each enzymes [23,24]. KDM7A protein production and AlphaScreen assay optimisation will be described elsewhere. RapidFire  $IC_{50}$  assay for KDM2A was carried out as described in [25].

#### Summary of tested indolines:

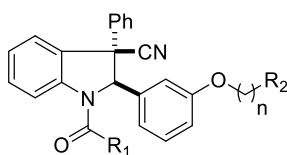

| Compound | n | R <sub>1</sub>  | R <sub>2</sub> |
|----------|---|-----------------|----------------|
| 56       | 4 | CH <sub>3</sub> |                |
| 57       | 5 | CH <sub>3</sub> |                |
| 58       | 6 | CH <sub>3</sub> |                |
| 59       | 7 | CH <sub>3</sub> |                |
| 60       | 8 | CH <sub>3</sub> |                |
| 62       | 9 | CH <sub>3</sub> |                |
| 65       | 7 |                 |                |
| 66       | 7 |                 |                |
| 67       | 7 | OEt             |                |
| 63       | 7 | Ph              |                |
| 64       | 7 |                 |                |
| 69       | 7 | CH <sub>3</sub> |                |

|           |   |                 |                                                                                     |
|-----------|---|-----------------|-------------------------------------------------------------------------------------|
| <b>70</b> | 7 | CH <sub>3</sub> |  |
| <b>18</b> | 7 | CH <sub>3</sub> | NEt <sub>2</sub>                                                                    |
| <b>32</b> | 7 | CH <sub>3</sub> |  |

**Table S-1:** Summary of class 1 indolines tested.

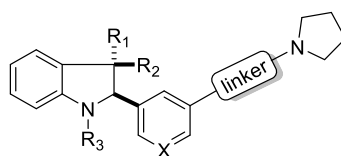

| Compound   | R <sub>1</sub>     | R <sub>2</sub>                                                                      | R <sub>3</sub>                                                                      | Aryl                                                                                 | linker                                                                                |
|------------|--------------------|-------------------------------------------------------------------------------------|-------------------------------------------------------------------------------------|--------------------------------------------------------------------------------------|---------------------------------------------------------------------------------------|
| <b>5</b>   | Ph                 | CN                                                                                  | COCH <sub>3</sub>                                                                   |    |    |
| <b>123</b> | CN                 | Ph                                                                                  | COCH <sub>3</sub>                                                                   |    |    |
| <b>124</b> | CN                 | CO <sub>2</sub> Et                                                                  | COCH <sub>3</sub>                                                                   |    |    |
| <b>10</b>  | Ph                 | CO <sub>2</sub> Me                                                                  | COCH <sub>3</sub>                                                                   |  |  |
| <b>125</b> | CO <sub>2</sub> Me | Ph                                                                                  | COCH <sub>3</sub>                                                                   |  |  |
| <b>11</b>  | CN                 |  | COCH <sub>3</sub>                                                                   |  |  |
| <b>142</b> | Ph                 | CN                                                                                  | H                                                                                   |  |  |
| <b>137</b> | Ph                 | CN                                                                                  | H                                                                                   |  |  |
| <b>6</b>   | Ph                 | CN                                                                                  | COCH <sub>3</sub>                                                                   |  |  |
| <b>139</b> | Ph                 | CN                                                                                  | COCH <sub>2</sub> CN                                                                |  |  |
| <b>12</b>  | Ph                 | CN                                                                                  | COCH <sub>2</sub> NH <sub>2</sub>                                                   |  |  |
| <b>127</b> | Ph                 | CN                                                                                  |  |  |  |
| <b>9</b>   | Ph                 | CN                                                                                  | COCH <sub>3</sub>                                                                   |  |  |
| <b>126</b> | CN                 | Ph                                                                                  | COCH <sub>3</sub>                                                                   |  |  |
| <b>132</b> | Ph                 | CN                                                                                  | COCH <sub>3</sub>                                                                   |  |  |
| <b>7</b>   | Ph                 | CN                                                                                  | COCH <sub>3</sub>                                                                   |  |  |

|                        |    |    |                   |                                                                                      |                                                                                       |
|------------------------|----|----|-------------------|--------------------------------------------------------------------------------------|---------------------------------------------------------------------------------------|
| <b>133</b>             | CN | Ph | COCH <sub>3</sub> |    | $\text{---}\equiv\text{---}(\text{CH}_2)_5\text{---}$                                 |
| <b>138</b>             | CN | Ph | COCH <sub>3</sub> |    | $\text{---}(\text{CH}_2)_7\text{---}$                                                 |
| <b>134</b>             | Ph | CN | COCH <sub>3</sub> |    | $\text{---}\equiv\text{---}(\text{CH}_2)_5\text{---}$                                 |
| <b>8</b>               | Ph | CN | COCH <sub>3</sub> |    | $\text{---}(\text{CH}_2)_7\text{---}$                                                 |
| <b>4</b>               | Ph | CN | COCH <sub>3</sub> |    | $\text{---}\equiv\text{---}(\text{CH}_2)_5\text{---}$                                 |
| <b>130</b>             | CN | Ph | COCH <sub>3</sub> |    | $\text{---}\equiv\text{---}(\text{CH}_2)_5\text{---}$                                 |
| <b>2</b>               | Ph | CN | COCH <sub>3</sub> |    |    |
| <b>119</b>             | CN | Ph | COCH <sub>3</sub> |    |    |
| <b>3</b>               | Ph | CN | COCH <sub>3</sub> |    |    |
| <b>145</b>             | CN | Ph | COCH <sub>3</sub> |    |    |
| <b>152</b>             | Ph | CN | COCH <sub>3</sub> |   |   |
| <b>148</b>             | Ph | CN | COCH <sub>3</sub> |  |  |
| <b>153<sup>a</sup></b> | Ph | CN | COCH <sub>3</sub> |  |  |
| <b>146<sup>b</sup></b> | Ph | CN | COCH <sub>3</sub> |  |  |

**Table S-2:** Summary of class 2 indolines tested. [a] 4-azaindoline scaffold. [b] NMe<sub>2</sub> capping group instead of pyrrolidine.

### AlphaScreen Data:

pIC<sub>50</sub> – average pIC<sub>50</sub> value when n (biological replicate) > 1; SD – standard deviation.

#### KDM2A

| ID         | SGC ID       | pIC <sub>50</sub> | SD    | n |
|------------|--------------|-------------------|-------|---|
| <b>119</b> | KDOOA011841a | 5.753             | 0.249 | 2 |
| <b>2</b>   | KDOOA011842a | 6.088             | 0.217 | 2 |
| <b>123</b> | KDOOA011843a | 6.408             | 0.359 | 4 |
| <b>5</b>   | KDOOA011844a | 6.605             | 0.134 | 4 |

**JARID1A (KDM5A)**

| ID      | SGC ID       | n | pIC50 | % Inhibition at 50 $\mu$ M |
|---------|--------------|---|-------|----------------------------|
| 4       | KDOIN000004a | 1 | < 4.3 | 39.0                       |
| 130     | KDOIN000005a | 1 | < 4.3 | 30.9                       |
| 6       | KDOIN000003a | 1 | < 4.3 | 25.5                       |
| 124     | KDOIN000010a | 1 | < 4.3 | 20.0                       |
| (R,R)-6 | KDOIN000014a | 1 | < 4.3 | 40.0                       |
| (S,S)-6 | KDOIN000015a | 1 | < 4.3 | -20.3                      |
| 138     | KDOIN000033a | 1 | < 4.3 | 46.6                       |
| 132     | KDOIN000034a | 1 | < 4.3 | 49.1                       |
| 7       | KDOIN000035a | 1 | < 4.3 | 47.5                       |
| 8       | KDOIN000040a | 1 | < 4.3 | 23.0                       |
| 145     | KDOIN000041a | 1 | < 4.3 | 36.7                       |
| 3       | KDOIN000042a | 1 | < 4.3 | 24.0                       |
| 119     | KDOOA011841a | 1 | < 4.3 | 39.5                       |
| 5       | KDOOA011844a | 1 | < 4.3 | 39.1                       |
| 123     | KDOOA011843a | 1 | < 4.3 | 35.3                       |

**JARID1B (KDM5B)**

| ID      | SGC ID       | pIC50 | SD    | n  |
|---------|--------------|-------|-------|----|
| (S,S)-6 | KDOIN000015a | 4.882 | 0.555 | 12 |
| 138     | KDOIN000033a | 5.019 | 0.548 | 12 |

**JARID1C (KDM5C)**

| ID      | SGC ID       | pIC50 | SD    | n  | % Inhibition at 100 $\mu$ M |
|---------|--------------|-------|-------|----|-----------------------------|
| 123     | KDOOA011843a | < 4.0 |       | 1  | 29.3                        |
| 5       | KDOOA011844a | < 4.0 |       | 1  | 32.3                        |
| 119     | KDOOA011841a | < 4.0 |       | 1  | 46.7                        |
| 2       | KDOOA011842a | 4.439 | 0.709 | 2  |                             |
| (S,S)-6 | KDOIN000015a | 4.803 | 0.207 | 10 |                             |
| 138     | KDOIN000033a | 5.006 | 0.185 | 10 |                             |

**JMJD1A (KDM3A)**

| ID      | SGC ID       | pIC50 | SD    | n | Mean % Inhibition at 100 $\mu$ M (n) |
|---------|--------------|-------|-------|---|--------------------------------------|
| (S,S)-6 | KDOIN000015a | < 4.0 |       | 1 | 35.4                                 |
| 119     | KDOOA011841a | < 4.0 |       | 1 | 21.1                                 |
| 2       | KDOOA011842a | < 4.0 |       | 1 | 32.5                                 |
| 5       | KDOOA011844a | < 4.0 |       | 2 | 15.1 $\pm$ 9.5                       |
| 123     | KDOOA011843a | < 4.0 |       | 2 | 18.1 $\pm$ 12                        |
| 138     | KDOIN000033a | 5.00  | 0.457 | 2 |                                      |

**JMJD2A (KDM4A)**

| ID      | SGC ID       | pIC50 | SD    | n | % Inhib. ( $\mu\text{M}$ ) |
|---------|--------------|-------|-------|---|----------------------------|
| 4       | KDOIN000004a | < 4.7 |       | 1 | 10.2 (18.75)               |
| 130     | KDOIN000005a | < 4.7 |       | 1 | -1.3 (18.75)               |
| 6       | KDOIN000003a | < 4.7 |       | 1 | -1.1 (18.75)               |
| 124     | KDOIN000010a | < 4.7 |       | 1 | -12.7 (18.75)              |
| (R,R)-6 | KDOIN000014a | < 4.7 |       | 1 | 7.8 (18.75)                |
| (S,S)-6 | KDOIN000015a | < 4.7 |       | 3 | 27.0 $\pm$ 4.0             |
| 9       | KDOIN000021a | < 4.7 |       | 1 | 3.4 (18.75)                |
| 126     | KDOIN000022a | < 4.7 |       | 1 | 27.8 (18.75)               |
| 133     | KDOIN000032a | < 4.7 |       | 1 | 19.8 (18.75)               |
| 138     | KDOIN000033a | < 4.7 |       | 3 | 24.4 $\pm$ 9.1 (10)        |
| 132     | KDOIN000034a | < 4.7 |       | 1 | 18.3 (18.75)               |
| 7       | KDOIN000035a | < 4.7 |       | 1 | 8.5 (18.75)                |
| 134     | KDOIN000036a | < 4.7 |       | 1 | 19.4 (18.75)               |
| 8       | KDOIN000040a | < 4.7 |       | 1 | 21.8 (18.75)               |
| 145     | KDOIN000041a | < 4.7 |       | 1 | -9.59 (18.75)              |
| 3       | KDOIN000042a | < 4.7 |       | 1 | -5.4 (18.75)               |
| 148     | KDOIN000044a | < 4.7 |       | 1 | -5.9 (18.75)               |
| 5       | KDOOA011844a | < 4.7 |       | 1 | 18.8 (100)                 |
| 123     | KDOOA011843a | < 4.7 |       | 1 | 14.7 (100)                 |
| 119     | KDOOA011841a | 4.140 | 0.350 | 2 |                            |
| 2       | KDOOA011842a | 4.413 | 0.220 | 2 |                            |

**JMJD2C (KDM4C)**

| ID      | SGC ID       | pIC50 | SD    | n | % Inhib. (conc, $\mu\text{M}$ ) |
|---------|--------------|-------|-------|---|---------------------------------|
| 123     | KDOOA011843a | < 4.0 |       | 1 | 14.7 (100)                      |
| 5       | KDOOA011844a | < 4.0 |       | 1 | 18.8 (100)                      |
| (S,S)-6 | KDOIN000015a | < 4.0 |       | 1 | 30.5 (10)                       |
| 138     | KDOIN000033a | < 4.0 |       | 1 | 32.3 (10)                       |
| 119     | KDOOA011841a | 4.140 | 0.350 | 2 |                                 |
| 2       | KDOOA011842a | 4.413 | 0.220 | 2 |                                 |

**JMJD2D (KDM4D)**

| ID      | SGC ID       | pIC50 | n | % Inhibition at 10 $\mu\text{M}$ |
|---------|--------------|-------|---|----------------------------------|
| (S,S)-6 | KDOIN000015a | < 4.0 | 1 | 22.6                             |
| 138     | KDOIN000033a | < 4.0 | 1 | 14.4                             |



**JMJD3A (KDM6B)**

| ID      | SGC ID       | pIC50 | SD    | n | % Inhib.<br>(conc, $\mu$ M) |
|---------|--------------|-------|-------|---|-----------------------------|
| 5       | KDOOA011844a | < 4.0 |       | 1 | 2.4                         |
| 119     | KDOOA011841a | < 4.0 |       | 1 | 24.6                        |
| 2       | KDOOA011842a | < 4.0 |       | 1 | 42.5                        |
| 123     | KDOOA011843a | < 4.0 |       | 1 | 3.3                         |
| (S,S)-6 | KDOIN000015a | 4.704 | 0.394 | 2 |                             |
| 138     | KDOIN000033a | 4.868 | 0.556 | 2 |                             |

**PHF8 (KDM7B)**

| ID      | SGC ID       | pIC50 | SD     | n |
|---------|--------------|-------|--------|---|
| (S,S)-6 | KDOIN000015a | 4.642 | 0.2956 | 2 |

**KIAA1718 (KDM7A)**

| ID      | SGC ID       | pIC50 | SD     | n |
|---------|--------------|-------|--------|---|
| (S,S)-6 | KDOIN000015a | 6.725 | 0.1400 | 3 |

**RapidFire Data for inhibition of KDM2A:**

| ID  | SGC ID       | pIC50 | SD    | n |
|-----|--------------|-------|-------|---|
| 148 | KDOIN000044a | 3.159 | 1.653 | 4 |
| 32  | KDOIN000017a | 4.533 | 0.312 | 2 |
| 18  | KDOIN000029a | 4.771 | 0.089 | 2 |
| 146 | KDOIN000060a | 5.199 | 0.199 | 4 |
| 70  | KDOIN000031a | 5.487 | 0.078 | 2 |
| 124 | KDOIN000010a | 5.518 | 0.044 | 2 |
| 119 | KDOOA011841a | 5.533 | 0.062 | 2 |
| 134 | KDOIN000036a | 5.621 | 0.085 | 2 |
| 125 | KDOIN000057a | 5.639 | 0.149 | 2 |
| 11  | KDOIN000061a | 5.624 | 0.465 | 2 |
| 56  | KDOIN000006a | 5.695 | 0.176 | 2 |
| 63  | KDOIN000023a | 5.695 | 0.176 | 2 |
| 130 | KDOIN000005a | 5.761 | 0.104 | 4 |
| 10  | KDOIN000056a | 5.799 | 0.162 | 2 |
| 62  | KDOIN000009a | 5.822 | 0.234 | 2 |
| 60  | KDOIN000008a | 5.861 | 0.103 | 2 |
| 65  | KDOIN000025a | 5.869 | 0.035 | 2 |
| 66  | KDOIN000026a | 5.881 | 0.055 | 2 |
| 7   | KDOIN000035a | 5.917 | 0.084 | 2 |
| 137 | KDOIN000074a | 5.884 | 0.162 | 2 |

|         |              |       |       |   |
|---------|--------------|-------|-------|---|
| 57      | KDOIN000018a | 5.903 | 0.180 | 2 |
| 67      | KDOIN000027a | 5.907 | 0.060 | 2 |
| 153     | KDOIN000062a | 5.881 | 0.383 | 2 |
| 2       | KDOOA011842a | 5.991 | 0.057 | 2 |
| 69      | KDOIN000030a | 5.971 | 0.063 | 2 |
| 58      | KDOIN000019a | 5.988 | 0.084 | 2 |
| 9       | KDOIN000021a | 6.016 | 0.066 | 2 |
| 59      | KDOIN000007a | 6.049 | 0.076 | 2 |
| 134     | KDOIN000034a | 5.990 | 0.070 | 2 |
| 133     | KDOIN000032a | 5.988 | 0.084 | 2 |
| 126     | KDOIN000022a | 5.983 | 0.114 | 2 |
| 145     | KDOIN000041a | 5.996 | 0.206 | 2 |
| 64      | KDOIN000024a | 6.054 | 0.046 | 2 |
| (R,R)-3 | KDOIN000042b | 6.074 | 0.093 | 2 |
| 152     | KDOIN000058a | 6.077 | 0.092 | 2 |
| 4       | KDOIN000004a | 6.177 | 0.102 | 4 |
| 123     | KDOOA011843a | 6.340 | 0.192 | 2 |
| (R,R)-6 | KDOIN000014a | 6.416 | 0.051 | 2 |
| (S,S)-3 | KDOIN000059a | 6.401 | 0.087 | 2 |
| 139     | KDOIN000073a | 6.368 | 0.097 | 2 |
| 3       | KDOIN000042a | 6.537 | 0.122 | 2 |
| 8       | KDOIN000040a | 6.485 | 0.180 | 2 |
| 138     | KDOIN000033a | 6.617 | 0.096 | 2 |
| 6       | KDOIN000003a | 6.606 | 0.174 | 4 |
| 142     | KDOIN000075a | 6.708 | 0.067 | 2 |
| 5       | KDOOA011844a | 6.662 | 0.186 | 2 |
| (S,S)-6 | KDOIN000015a | 6.799 | 0.041 | 2 |
| 12      | KDOIN000072a | 6.910 | 0.064 | 2 |

### Indole-based inhibitors:

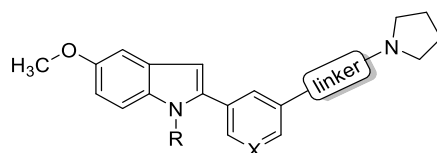

| R | linker | IC <sub>50</sub> (μM) |
|---|--------|-----------------------|
|   |        | 6.29                  |
|   |        | 2.13                  |

|                                                                                     |                                                                                     |      |
|-------------------------------------------------------------------------------------|-------------------------------------------------------------------------------------|------|
|    |    | 1.76 |
|    |    | 1.63 |
|    |    | 2.01 |
|    |    | 133  |
|    |    | 2.78 |
|    |    | 6.13 |
|    |    | 6.23 |
|   |   | 3.55 |
|  |  | 2.63 |
|  |  | 1.75 |
|  |  | 1.31 |

**Table S-3:** Summary of indoles tested. IC<sub>50</sub> values correspond to KDM2A inhibition by AlphaScreen.

## 3.2 Selectivity-screening against other epigenetic writer and reader proteins

### Methyl-Lysine Reader domain assays.

Fluorescence polarisation assays for methyl-lysine reader domains were carried out as described [26]. AlphaScreen peptide displacement assays were performed according to manufacturer's protocol (PerkinElmer, USA) with minor modifications. All reagents were diluted in 25 mM HEPES, 100 mM NaCl, 0.1 % BSA, pH 7.4 and 0.05 % CHAPS and allowed to equilibrate to room temperature prior to addition to plates. An 11-point 1:2.0

serial dilution of the ligands was prepared on low-volume 384-well plates (ProxiPlate™-384 Plus, PerkinElmer, USA), using LabCyte Eco liquid handler. Plates filled with 5  $\mu$ L of the assay buffer followed by 7  $\mu$ L of biotinylated peptide ARTK(me3)QTARKSTGGKAPRK-biotin and His-tagged protein to achieve final assay concentrations of 25 nM. Plates were sealed and incubated for a further 60 minutes, before the addition of 8  $\mu$ L of the mixture of streptavidin-coated donor beads (12.5  $\mu$ g/ml) and nickel chelate acceptor beads (12.5  $\mu$ g/ml) under low light conditions. Plates were foil-sealed to protect from light, incubated at room temperature for 60 minutes and read on a PHERAstar FS plate reader (BMG Labtech, Germany) using an AlphaScreen 680 excitation/570 emission filter set. IC<sub>50</sub> values were calculated in Prism 6 (GraphPad Software, USA) after normalization against corresponding DMSO controls and are given as the final concentration of compound in the 20  $\mu$ L reaction volume.

| Chromodomains                             | WD40 domains                              | Tudor domains                              |                                            |                                            |
|-------------------------------------------|-------------------------------------------|--------------------------------------------|--------------------------------------------|--------------------------------------------|
| <b>CBX8</b><br>> 100 $\mu$ M <sup>+</sup> | <b>WDR5</b><br>> 100 $\mu$ M <sup>+</sup> | <b>UHRF1</b><br>> 100 $\mu$ M <sup>+</sup> | <b>53BP1</b><br>> 100 $\mu$ M <sup>+</sup> | <b>TDRD3</b><br>> 100 $\mu$ M <sup>+</sup> |
| <b>CHD1</b><br>>20 $\mu$ M*               | <b>PHD-finger domain</b>                  | <b>SGF29</b><br>>20 $\mu$ M*               | <b>KDM4A</b><br>>20 $\mu$ M*               | <b>SPIN1</b><br>>20 $\mu$ M*               |
|                                           | <b>KDM7B</b><br>>20 $\mu$ M*              |                                            |                                            |                                            |

**Table S-4:** IC<sub>50</sub> values for inhibition of methyl-lysine domains by (S,S)-6. Data generated using \* AlphaScreen<sup>+</sup> Fluorescence Polarisation assay.

#### **Methyltransferase and Acetyltransferase assays.**

(S,S)-6 at two different concentrations was screened for inhibition against a panel of 35 methyltransferases (MTs) and 5 histone acetyltransferases (HATs). Assays were carried out in 20mM Tris pH8.0, 5mM DTT, 0.01% Triton X-100 buffer, with S-adenosinyl L-methionine (SAM) or acetyl-coenzyme A (Acetyl-CoA) and substrate concentrations close to K<sub>M</sub> values for each enzyme.

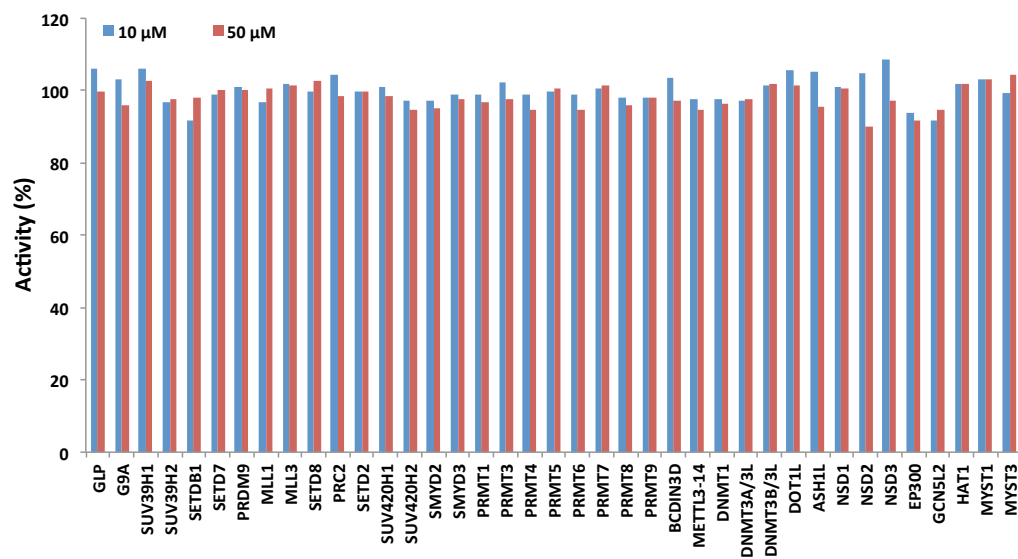

**Figure S-1.** Enzyme activity screening of methyltransferases and histone acetyltransferases in the presence of (S,S)-6. Percentage activity of the enzyme remaining when incubated with 10 μM or 50 μM (S,S)-6. Average (N = 2) is shown.

### 3.3 Cellular immunofluorescence activity assay and HeLa cytotoxicity

Cellular immunofluorescence (IF) assays were carried out as described [27]. In brief, HeLa cells were acclimatised to lower serum concentration (0.5% foetal calf serum (FCS)) for at least a week. Acclimatised cells were transiently transfected with a plasmid encoding either a FLAG-tagged wild-type (WT) or catalytically inactive mutant (H212A/D214A, MUT) KDM2A using Lipofectamine 2000 (Life Technologies). Four hours after transfection the cells were treated with serial dilutions of compound for 24 hours in OPTIMEM supplemented with 0.5% FCS. The cells were then fixed and stained with an anti-FLAG antibody (Sigma F7425) and an anti-H3K36me2 antibody (Active Motif 61019) overnight at four degrees. The secondary antibodies were Alexa 488 anti-mouse and Alexa 568 anti-rabbit (Life Technologies). After staining the nuclei with DAPI, the cells were imaged on the Operetta High Content Imaging System (PerkinElmer) and image analysis was performed with the Columbus software (PerkinElmer). H3K36me2 levels were only analysed in cells highly expressing the demethylase. HeLa cellular toxicity was determined by counting the total number of DAPI-stained nuclei imaged in 12 fields (x20 objective) during the KDM IF assay shown (representative of 3 experiments).

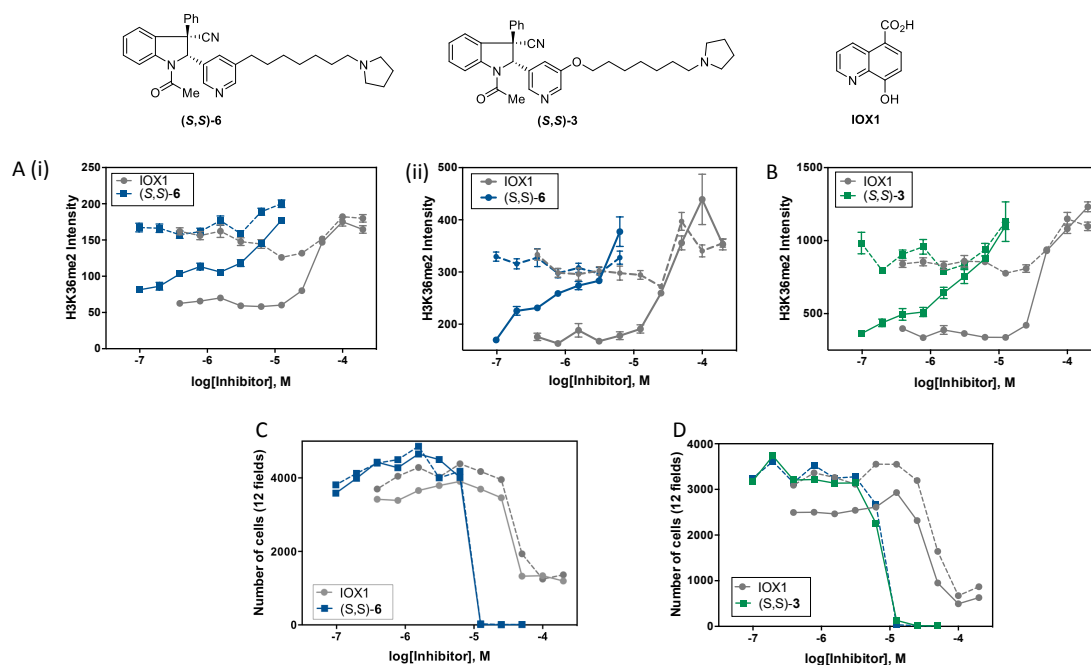

**Figure S-2. Cellular effects of inhibitor dosing on HeLa cells overexpressing KDM2A.** (A,B) Immunofluorescence assay measuring the global nuclear H3K36me2 staining levels (average  $\pm$  SEM (N >100 transfected cells)) of HeLa cells overexpressing FLAG-tagged wild-type or catalytically mutant KDM2A (full-length). IOX1 is used as a positive control [23,26]. Datasets for N <100 cells are omitted. Examples of two independent experiments are shown for (S,S)-6 (A i, ii) with (i) data presented in Figure 2A. (C,D) Number of cells in 12 fields (all cells) based on DAPI staining, corresponding to the IF data (A.i and C, B and D). EC<sub>50</sub> for cell viability calculated using DAPI staining are: (S,S)-6 (7.6  $\mu$ M), (S,S)-3 (7.2  $\mu$ M) and IOX1 (appx. 50  $\mu$ M); Solid lines – wild type KDM2A transfected wells; Dashed lines – catalytic mutant KDM2A transfected wells.

### 3.4 Additional viability assays

#### Viability assays in HAP1 cells

HAP1 cells (4000 cells / well) were treated with compounds or DMSO for 48h in triplicates. Cell viability was measured by luminescent ATP read-out (CellTiterGlo, Promega) and normalised to the DMSO control (plotted as lowest concentration point to allow log-calculation). Data analysis including  $EC_{50}$  calculations was performed in GraphPad Prism. Dose response curves are representative of multiple experiments (2-3 biological replicates each).

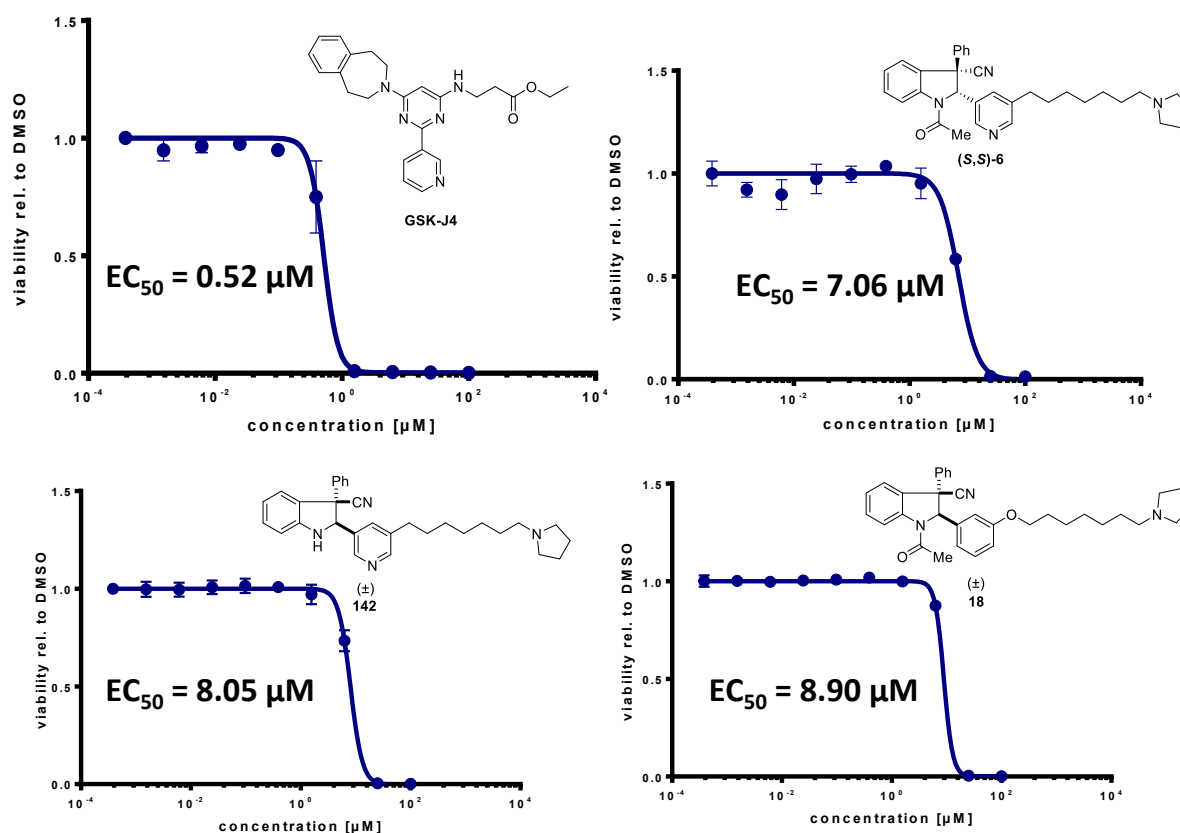

**Figure S-3. KDM Inhibitor Toxicity on HAP1 Cells.** HAP1 wild-type cells were treated with the indicated concentrations of various KDM inhibitors for 2 days. Cell viability was measured by luminescent ATP read-out and normalised to a DMSO control. The graphs show the mean of triplicate measurements and are representative of 2-3 independent experiments. Error bars indicate SEM.

#### Cell proliferation assay

Human fibroblasts (HDFa) from ThermoFisher were cultured in Medium 106 supplemented with Low Serum Growth Supplement Kit (ThermoFisher). HDFa cells were trypsinized and plated 24 hrs before addition of compound in a standard 96-well tissue culture plate so that they were subconfluent a day later. The next day, the medium was replaced with fresh medium containing compound at various dilutions starting at 100 $\mu\text{M}$  with 1:2 serial dilutions. The solvent concentration was maintained at 0.2% DMSO for each dilution and each

compound was tested in triplicate. After 24hrs, the medium in each well was replaced with fresh medium containing 10% WST-1 (Roche) and incubated for 1 hr. The plate was read on a Spectramax spectrophotometer (Molecular Devices) and blanked against wells containing medium only. The dose response curves were then plotted in GraphPad Prism 6.0.

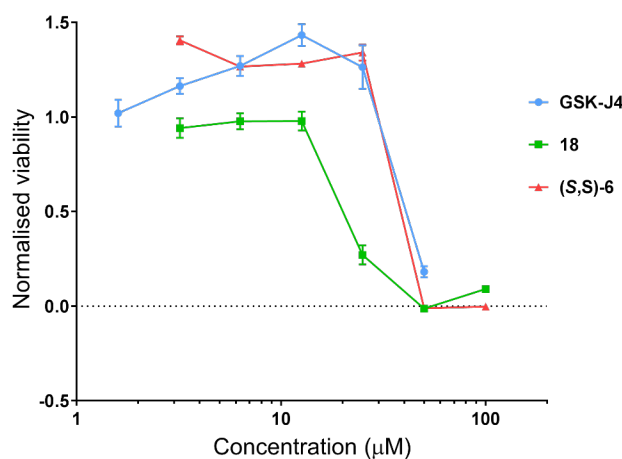

Figure S-4. KDM inhibitor toxicity on Human Dermal Fibroblasts using WST1 assay.

## IV) Transcriptomics

### RNA sequencing protocol:

HAP1 cells were plated in 12-well plates. KDM inhibitors were added the next day (2 concentrations each, HI = 10 µM, LO = 1 µM; duplicates for each condition) and cells were treated for 24 h. Afterwards, cells were washed twice with cold PBS and frozen at -80°C. Total RNA was isolated using the RNeasy Mini kit (Qiagen) and 500ng were used as input for library preparation with the QuantSeq 3' mRNA-Seq Library Prep Kit (Lexogen) according to manufacturer's instructions (13 instead of 12 PCR cycles were used for library amplification). cDNA concentrations were measured using Qubit dsDNA HS assay on a Qubit 2.0 Fluorometric Quantitation System (Life Technologies). Amplified libraries (7 ng) were pooled (48 samples per sequencing lane) and analysed for size distribution on an Agilent Tapestation 2200 D1000. Libraries were quantified using a Library Quant Kit (Kapa Biosystems) and sequenced on a HiSeq 2500 (Illumina) machine (50bp single-end) following the manufacturer's guidelines. Illumina's sequencing primer was exchanged with Lexogen's CSP primer in order to pinpoint the 3' end of each mRNA.



Raw sequencing data was cleaned to discard low-quality reads and then aligned onto the human reference genome using GSNAP [28]. Gene expression was evaluated on GENCODE genes using Exp3p ([github.com/tkonopka/Exp3p](https://github.com/tkonopka/Exp3p)). Subsequent gene expression analysis was performed using package ExpCube ([github.com/tkonopka/ExpCube](https://github.com/tkonopka/ExpCube)) following a previously described procedure [29] and default package settings. In brief, variability in gene expression among DMSO-treated samples was used to empirically adjust gene expression uncertainty intervals provided by Exp3p. Each gene in each sample was then scored for differential expression against the DMSO-treated samples. A score of +1 was assigned if the fold change was above 1.75 and a z-score was above 1.75. Lower scores were given for weaker signals, and similar thresholds were applied for down-regulated genes. Scores among replicates were averaged to produce group-wise scores, and genes were finally called as differentially expressed if the group score was above 0.8. Raw sequencing data will become available at the European Nucleotide Archive.

#### Table of gene expression changes:

| Gene     | Compound (conc.*) | Fold change |
|----------|-------------------|-------------|
| MT1E     | GSKJ1J4_HI        | 2.0907      |
| MT1F     | GSKJ1J4_HI        | 1.9188      |
| MT1X     | GSKJ1J4_HI        | 2.4833      |
| MT2A     | GSKJ1J4_HI        | 3.2407      |
| RAB40C   | GSKJ1J4_HI        | 2.6167      |
| SLC16A3  | GSKJ1J4_HI        | 2.6995      |
| TMEM63B  | GSKJ1J4_HI        | 2.2001      |
| ZNF550   | GSKJ1J4_LO        | 0.5206      |
| MT1E     | GSKJ1J4_LO        | 2.2194      |
| MT1F     | GSKJ1J4_LO        | 1.9364      |
| MT2A     | GSKJ1J4_LO        | 3.2511      |
| ALDH1B1  | 18_HI             | 0.3503      |
| ALDH5A1  | 18_HI             | 0.3545      |
| ANXA1    | 18_HI             | 0.2586      |
| AP1B1    | 18_HI             | 0.5191      |
| ARHGAP18 | 18_HI             | 0.4115      |
| ATP5G1   | 18_HI             | 0.4941      |
| ATP5G3   | 18_HI             | 0.4962      |
| BAG2     | 18_HI             | 0.4839      |
| BOP1     | 18_HI             | 0.4516      |
| C12orf43 | 18_HI             | 0.4081      |
| C16orf59 | 18_HI             | 0.4446      |
| CAMKV    | 18_HI             | 0.3676      |
| CCDC71   | 18_HI             | 0.3555      |

---

|          |       |        |
|----------|-------|--------|
| CCDC86   | 18_HI | 0.4756 |
| CD3EAP   | 18_HI | 0.4155 |
| CDKN3    | 18_HI | 0.4345 |
| CHCHD10  | 18_HI | 0.457  |
| CHCHD7   | 18_HI | 0.409  |
| CIRH1A   | 18_HI | 0.4887 |
| CNN2     | 18_HI | 0.5043 |
| COQ3     | 18_HI | 0.4803 |
| DDX23    | 18_HI | 0.5221 |
| DPH2     | 18_HI | 0.4277 |
| ELAC2    | 18_HI | 0.4768 |
| EMG1     | 18_HI | 0.426  |
| ERCC6L   | 18_HI | 0.4259 |
| FABP5    | 18_HI | 0.4899 |
| FARSB    | 18_HI | 0.5197 |
| FASTKD1  | 18_HI | 0.4552 |
| GAS2L1   | 18_HI | 0.4253 |
| GDAP1    | 18_HI | 0.3718 |
| GEMIN6   | 18_HI | 0.4869 |
| GFM1     | 18_HI | 0.3642 |
| GNG2     | 18_HI | 0.3686 |
| IPO4     | 18_HI | 0.4243 |
| IVNS1ABP | 18_HI | 0.4996 |
| JMJD4    | 18_HI | 0.3511 |
| KM-PA-2  | 18_HI | 0.449  |
| LGSN     | 18_HI | 0.1996 |
| MCM4     | 18_HI | 0.4963 |
| MIPEP    | 18_HI | 0.3272 |
| MRPL12   | 18_HI | 0.3879 |
| MRPS33   | 18_HI | 0.5073 |
| MT-ND6   | 18_HI | 0.3952 |
| MTRNR2L1 | 18_HI | 0.3885 |
| MTRNR2L2 | 18_HI | 0.361  |
| MT-TC    | 18_HI | 0.3485 |
| MT-TM    | 18_HI | 0.1557 |
| MT-TN    | 18_HI | 0.3898 |
| MT-TS2   | 18_HI | 0.3194 |
| MYBBP1A  | 18_HI | 0.5322 |
| MYCBP    | 18_HI | 0.29   |
| NAV3     | 18_HI | 0.33   |
| NDUFAF3  | 18_HI | 0.425  |
| NLE1     | 18_HI | 0.4413 |
| NOP9     | 18_HI | 0.4534 |
| NRGN     | 18_HI | 0.3732 |
| PAK1IP1  | 18_HI | 0.4861 |

---

---

|              |       |        |
|--------------|-------|--------|
| PDK3         | 18_HI | 0.4215 |
| PIGW         | 18_HI | 0.4651 |
| PKMYT1       | 18_HI | 0.5094 |
| POLA2        | 18_HI | 0.3758 |
| POLR2L       | 18_HI | 0.5005 |
| PRMT1        | 18_HI | 0.4966 |
| PSMD3        | 18_HI | 0.4887 |
| PTGES2       | 18_HI | 0.4368 |
| RFC3         | 18_HI | 0.4401 |
| RP11-145M9.4 | 18_HI | 0.4377 |
| RP5-886K2.3  | 18_HI | 0.3184 |
| RTN4IP1      | 18_HI | 0.3488 |
| RUVBL1       | 18_HI | 0.5094 |
| SCFD2        | 18_HI | 0.4413 |
| SDF2L1       | 18_HI | 0.4852 |
| SEMA3A       | 18_HI | 0.3525 |
| SEPW1        | 18_HI | 0.4863 |
| SLC43A2      | 18_HI | 0.4959 |
| SRM          | 18_HI | 0.4571 |
| SUV39H1      | 18_HI | 0.4456 |
| SVIP         | 18_HI | 0.4669 |
| TIMM8A       | 18_HI | 0.2646 |
| TIPIN        | 18_HI | 0.3974 |
| TMEM177      | 18_HI | 0.388  |
| TPD52L1      | 18_HI | 0.3055 |
| TUBA1B       | 18_HI | 0.4485 |
| TUBB         | 18_HI | 0.487  |
| TUBB4B       | 18_HI | 0.4041 |
| TUBG1        | 18_HI | 0.4803 |
| UCP2         | 18_HI | 0.3485 |
| UHRF1        | 18_HI | 0.4563 |
| UMPS         | 18_HI | 0.471  |
| UNG          | 18_HI | 0.4104 |
| VPS9D1-AS1   | 18_HI | 0.3836 |
| WDR4         | 18_HI | 0.4567 |
| WDR46        | 18_HI | 0.4258 |
| XRCC5        | 18_HI | 0.5372 |
| ZNF17        | 18_HI | 0.2465 |
| ZWINT        | 18_HI | 0.4735 |
| ABL1         | 18_HI | 5.66   |
| AC159540.1   | 18_HI | 3.7418 |
| ACAT2        | 18_HI | 2.4699 |
| ACSS2        | 18_HI | 3.6116 |
| ADM2         | 18_HI | 4.19   |
| ADRA2C       | 18_HI | 3.1276 |

---

---

|               |       |         |
|---------------|-------|---------|
| AGO3          | 18_HI | 2.2012  |
| AKNA          | 18_HI | 4.1566  |
| ALDOC         | 18_HI | 2.9672  |
| ARID5B        | 18_HI | 2.4555  |
| ASNS          | 18_HI | 2.431   |
| ASS1          | 18_HI | 7.1909  |
| ATF3          | 18_HI | 5.1861  |
| ATXN2L        | 18_HI | 3.2466  |
| BHLHE22       | 18_HI | 2.7722  |
| CACNA2D2      | 18_HI | 3.0487  |
| CAMK2N1       | 18_HI | 2.3366  |
| CCL18         | 18_HI | 4.793   |
| CEBPB         | 18_HI | 2.8466  |
| CEBPG         | 18_HI | 2.2092  |
| CHAC1         | 18_HI | 6.0447  |
| CLCN6         | 18_HI | 2.4903  |
| CNR1          | 18_HI | 13.9931 |
| COLGALT2      | 18_HI | 2.6122  |
| CREB3L1       | 18_HI | 4.237   |
| CTC-444N24.11 | 18_HI | 2.7375  |
| CTH           | 18_HI | 2.5996  |
| CYP51A1       | 18_HI | 3.0066  |
| DAAM1         | 18_HI | 2.3059  |
| DDIT3         | 18_HI | 3.919   |
| DDIT4         | 18_HI | 6.867   |
| DDX26B        | 18_HI | 2.3394  |
| DHCR7         | 18_HI | 2.2907  |
| DLK1          | 18_HI | 3.6025  |
| DLL1          | 18_HI | 3.9184  |
| DST           | 18_HI | 2.6356  |
| EGR1          | 18_HI | 5.7539  |
| FA2H          | 18_HI | 3.1     |
| FADS1         | 18_HI | 2.353   |
| FAM129A       | 18_HI | 4.8189  |
| FDPS          | 18_HI | 2.4722  |
| FNIP2         | 18_HI | 2.559   |
| FTL           | 18_HI | 2.0875  |
| FYN           | 18_HI | 3.2712  |
| FZD7          | 18_HI | 2.8274  |
| GADD45A       | 18_HI | 2.5823  |
| GADD45G       | 18_HI | 2.2124  |
| GDF15         | 18_HI | 13.232  |
| GOLGB1        | 18_HI | 2.6135  |
| GPM6B         | 18_HI | 3.2646  |
| HERPUD1       | 18_HI | 2.9467  |

---

---

|           |       |         |
|-----------|-------|---------|
| HMGCR     | 18_HI | 2.7638  |
| HMGCS1    | 18_HI | 5.1171  |
| HRK       | 18_HI | 5.1215  |
| HSD17B7   | 18_HI | 2.5229  |
| IDI1      | 18_HI | 2.7214  |
| IGF2R     | 18_HI | 3.4711  |
| INHBE     | 18_HI | 8.2963  |
| INSIG1    | 18_HI | 5.6273  |
| INSM1     | 18_HI | 3.4284  |
| JUN       | 18_HI | 8.7752  |
| JUND      | 18_HI | 3.1845  |
| KLHL24    | 18_HI | 3.5878  |
| LIMCH1    | 18_HI | 2.4689  |
| LINC00086 | 18_HI | 2.7542  |
| LIPG      | 18_HI | 4.5117  |
| LRP8      | 18_HI | 2.3141  |
| LRRD1     | 18_HI | 2.9128  |
| LRRN1     | 18_HI | 2.7177  |
| LSS       | 18_HI | 2.6824  |
| LUZP2     | 18_HI | 3.7098  |
| MAF       | 18_HI | 4.7708  |
| MALAT1    | 18_HI | 3.4188  |
| MAP1B     | 18_HI | 2.3707  |
| MMAB      | 18_HI | 2.2522  |
| MSMO1     | 18_HI | 3.1185  |
| MVD       | 18_HI | 4.3176  |
| MVK       | 18_HI | 2.3755  |
| NEU1      | 18_HI | 3.1338  |
| NEUROG2   | 18_HI | 10.6425 |
| NPTXR     | 18_HI | 2.427   |
| NUPR1     | 18_HI | 8.8782  |
| OPTN      | 18_HI | 3.2986  |
| PARD3B    | 18_HI | 4.2091  |
| PGPEP1    | 18_HI | 2.3484  |
| PLCB1     | 18_HI | 2.6651  |
| PLXNA2    | 18_HI | 3.9174  |
| PLXNC1    | 18_HI | 2.1336  |
| PMAIP1    | 18_HI | 2.0498  |
| PNPLA3    | 18_HI | 4.0521  |
| PNRC1     | 18_HI | 2.5567  |
| PPP1R15A  | 18_HI | 4.5274  |
| RENBP     | 18_HI | 9.3875  |
| RFX4      | 18_HI | 3.3044  |
| RN7SK     | 18_HI | 6.5757  |
| RN7SL1    | 18_HI | 3.707   |

---

---

|               |            |        |
|---------------|------------|--------|
| RN7SL2        | 18_HI      | 4.5714 |
| RN7SL5P       | 18_HI      | 4.2667 |
| RP11-265D19.6 | 18_HI      | 3.802  |
| RP11-390P2.4  | 18_HI      | 5.9028 |
| RP11-54O7.1   | 18_HI      | 3.908  |
| RP11-54O7.2   | 18_HI      | 3.5638 |
| RP11-73M18.9  | 18_HI      | 3.4741 |
| RP5-952N6.1   | 18_HI      | 4.076  |
| RPS6KA2       | 18_HI      | 2.2401 |
| SARS          | 18_HI      | 1.9547 |
| SC5D          | 18_HI      | 1.9931 |
| SERPINF1      | 18_HI      | 4.21   |
| SESN2         | 18_HI      | 2.4825 |
| SHC2          | 18_HI      | 3.609  |
| SLC1A4        | 18_HI      | 2.3455 |
| SLC38A7       | 18_HI      | 2.6138 |
| SLC3A2        | 18_HI      | 2.055  |
| SLC6A9        | 18_HI      | 3.1666 |
| SLC7A11       | 18_HI      | 3.2405 |
| SLFN5         | 18_HI      | 4.4807 |
| SLIT2         | 18_HI      | 3.385  |
| SOX21         | 18_HI      | 2.3046 |
| SQLE          | 18_HI      | 2.2821 |
| SRGAP1        | 18_HI      | 4.2997 |
| STARD4        | 18_HI      | 3.3651 |
| STAT2         | 18_HI      | 2.5389 |
| STC2          | 18_HI      | 2.9119 |
| STX3          | 18_HI      | 2.2503 |
| TBC1D9        | 18_HI      | 2.4082 |
| THSD4         | 18_HI      | 2.5675 |
| TMEM2         | 18_HI      | 2.2466 |
| TMSB4X        | 18_HI      | 2.8999 |
| TNRC6B        | 18_HI      | 2.3131 |
| TRIB3         | 18_HI      | 2.6484 |
| TSC22D3       | 18_HI      | 4.411  |
| TTC28         | 18_HI      | 2.1222 |
| UAP1L1        | 18_HI      | 2.2236 |
| VCAM1         | 18_HI      | 4.729  |
| VEGFA         | 18_HI      | 4.0584 |
| VLDLR         | 18_HI      | 3.0539 |
| WIPI1         | 18_HI      | 5.7027 |
| ZBED3         | 18_HI      | 2.1499 |
| ZSCAN18       | 18_HI      | 2.82   |
| ADAMTS1       | 18_LO      | 0.3645 |
| ALDH1B1       | (S,S)-6_HI | 0.3893 |

---

---

|              |            |        |
|--------------|------------|--------|
| ATP10D       | (S,S)-6_HI | 0.4706 |
| C17orf104    | (S,S)-6_HI | 0.3713 |
| CCDC86       | (S,S)-6_HI | 0.4357 |
| CD3EAP       | (S,S)-6_HI | 0.3461 |
| CHCHD10      | (S,S)-6_HI | 0.4677 |
| CHCHD7       | (S,S)-6_HI | 0.4271 |
| CHN1         | (S,S)-6_HI | 0.4565 |
| CNN2         | (S,S)-6_HI | 0.4226 |
| DCLK1        | (S,S)-6_HI | 0.472  |
| ENOSF1       | (S,S)-6_HI | 0.4464 |
| ERCC6L       | (S,S)-6_HI | 0.4293 |
| FABP5        | (S,S)-6_HI | 0.4735 |
| FANCF        | (S,S)-6_HI | 0.3613 |
| FGF13        | (S,S)-6_HI | 0.4284 |
| FKBP4        | (S,S)-6_HI | 0.4631 |
| GALNT12      | (S,S)-6_HI | 0.2182 |
| GCSH         | (S,S)-6_HI | 0.5103 |
| GIN52        | (S,S)-6_HI | 0.4722 |
| GPD2         | (S,S)-6_HI | 0.4302 |
| GTF3C6       | (S,S)-6_HI | 0.5225 |
| HIST1H1D     | (S,S)-6_HI | 0.231  |
| IVNS1ABP     | (S,S)-6_HI | 0.4897 |
| KCND2        | (S,S)-6_HI | 0.2938 |
| KISS1R       | (S,S)-6_HI | 0.3999 |
| LIN28B       | (S,S)-6_HI | 0.4238 |
| MCCC2        | (S,S)-6_HI | 0.3173 |
| MFI2-AS1     | (S,S)-6_HI | 0.2878 |
| MME          | (S,S)-6_HI | 0.4238 |
| MT1E         | (S,S)-6_HI | 0.4267 |
| MT1F         | (S,S)-6_HI | 0.4161 |
| MYBBP1A      | (S,S)-6_HI | 0.4852 |
| MYCBP        | (S,S)-6_HI | 0.3961 |
| NAV3         | (S,S)-6_HI | 0.2758 |
| POLR3H       | (S,S)-6_HI | 0.475  |
| RP11-31F19.1 | (S,S)-6_HI | 0.3148 |
| RPP25        | (S,S)-6_HI | 0.3562 |
| SCFD2        | (S,S)-6_HI | 0.2721 |
| SEMA3A       | (S,S)-6_HI | 0.1927 |
| SLC2A4RG     | (S,S)-6_HI | 0.4778 |
| TAF9B        | (S,S)-6_HI | 0.4942 |
| TIMM8A       | (S,S)-6_HI | 0.3904 |
| TMEM261      | (S,S)-6_HI | 0.4919 |
| TNS3         | (S,S)-6_HI | 0.4216 |
| TXNDC17      | (S,S)-6_HI | 0.4379 |
| VPS9D1-AS1   | (S,S)-6_HI | 0.3669 |

---

---

|          |            |        |
|----------|------------|--------|
| ACAT2    | (S,S)-6_HI | 4.6371 |
| ACSL4    | (S,S)-6_HI | 1.9564 |
| ACSS2    | (S,S)-6_HI | 3.6303 |
| ADM      | (S,S)-6_HI | 2.1079 |
| ALDOC    | (S,S)-6_HI | 5.5455 |
| AMDHD2   | (S,S)-6_HI | 2.4027 |
| ASNS     | (S,S)-6_HI | 2.0167 |
| ATF3     | (S,S)-6_HI | 6.4519 |
| ATP6V0A1 | (S,S)-6_HI | 2.9255 |
| BBC3     | (S,S)-6_HI | 1.9576 |
| BHLHE40  | (S,S)-6_HI | 3.7678 |
| BICD1    | (S,S)-6_HI | 2.1192 |
| BLOC1S2  | (S,S)-6_HI | 2.117  |
| BLVRB    | (S,S)-6_HI | 2.7103 |
| BNIP3P1  | (S,S)-6_HI | 1.9652 |
| BRF2     | (S,S)-6_HI | 2.3323 |
| C10orf35 | (S,S)-6_HI | 2.2849 |
| C14orf1  | (S,S)-6_HI | 2.5026 |
| C6orf1   | (S,S)-6_HI | 2.2739 |
| CACNA2D2 | (S,S)-6_HI | 3.1812 |
| CCL18    | (S,S)-6_HI | 7.2115 |
| CD70     | (S,S)-6_HI | 2.1    |
| CDKN1A   | (S,S)-6_HI | 4.6469 |
| CEBPB    | (S,S)-6_HI | 2.356  |
| CHAC1    | (S,S)-6_HI | 3.963  |
| CHPF2    | (S,S)-6_HI | 2.4365 |
| CLCN6    | (S,S)-6_HI | 2.9713 |
| CLCN7    | (S,S)-6_HI | 2.0449 |
| CLU      | (S,S)-6_HI | 2.3983 |
| CRYAA    | (S,S)-6_HI | 8.3321 |
| CTH      | (S,S)-6_HI | 2.1147 |
| CTSD     | (S,S)-6_HI | 3.1788 |
| CYLD     | (S,S)-6_HI | 2.3486 |
| CYP51A1  | (S,S)-6_HI | 3.3282 |
| DDIT3    | (S,S)-6_HI | 3.8741 |
| DDIT4    | (S,S)-6_HI | 7.5524 |
| DHCR24   | (S,S)-6_HI | 4.4157 |
| DHCR7    | (S,S)-6_HI | 3.262  |
| DYNC1H1  | (S,S)-6_HI | 2.2429 |
| EBP      | (S,S)-6_HI | 2.1981 |
| EIF2AK3  | (S,S)-6_HI | 3.1385 |
| ELOVL6   | (S,S)-6_HI | 2.7144 |
| ENO2     | (S,S)-6_HI | 2.4436 |
| FA2H     | (S,S)-6_HI | 3.4973 |
| FADS1    | (S,S)-6_HI | 2.3944 |

---



---

|           |            |         |
|-----------|------------|---------|
| FADS2     | (S,S)-6_HI | 2.0969  |
| FAM129A   | (S,S)-6_HI | 3.4036  |
| FAM219A   | (S,S)-6_HI | 2.6558  |
| FASN      | (S,S)-6_HI | 2.2437  |
| FDFT1     | (S,S)-6_HI | 2.5978  |
| FDPS      | (S,S)-6_HI | 3.8535  |
| FLCN      | (S,S)-6_HI | 2.5249  |
| FNIP1     | (S,S)-6_HI | 1.9599  |
| FNIP2     | (S,S)-6_HI | 2.2589  |
| FOS       | (S,S)-6_HI | 6.0247  |
| FTL       | (S,S)-6_HI | 2.6565  |
| GABARAPL1 | (S,S)-6_HI | 2.9028  |
| GADD45A   | (S,S)-6_HI | 2.7988  |
| GOLGA2    | (S,S)-6_HI | 2.2351  |
| GSTP1     | (S,S)-6_HI | 2.4334  |
| HERPUD1   | (S,S)-6_HI | 2.0488  |
| HMGCR     | (S,S)-6_HI | 3.8679  |
| HMGCS1    | (S,S)-6_HI | 8.2428  |
| HMOX1     | (S,S)-6_HI | 6.8056  |
| HRK       | (S,S)-6_HI | 4.6729  |
| HSD17B7   | (S,S)-6_HI | 3.8005  |
| HSD17B7P2 | (S,S)-6_HI | 3.7994  |
| HSPA1A    | (S,S)-6_HI | 2.4003  |
| HSPA1B    | (S,S)-6_HI | 2.6978  |
| IDI1      | (S,S)-6_HI | 2.9232  |
| IGF2R     | (S,S)-6_HI | 3.1292  |
| INSIG1    | (S,S)-6_HI | 7.1722  |
| JDP2      | (S,S)-6_HI | 2.4164  |
| JUN       | (S,S)-6_HI | 14.5392 |
| JUND      | (S,S)-6_HI | 3.0464  |
| KDM6B     | (S,S)-6_HI | 2.6529  |
| KLF11     | (S,S)-6_HI | 3.3754  |
| KLF2      | (S,S)-6_HI | 2.8813  |
| KLF6      | (S,S)-6_HI | 2.159   |
| KLHL21    | (S,S)-6_HI | 2.5235  |
| KLHL24    | (S,S)-6_HI | 2.3626  |
| LBH       | (S,S)-6_HI | 2.3929  |
| LINC00086 | (S,S)-6_HI | 2.1979  |
| LINC00685 | (S,S)-6_HI | 2.0497  |
| LINC00963 | (S,S)-6_HI | 3.6953  |
| LIPG      | (S,S)-6_HI | 5.096   |
| LPIN1     | (S,S)-6_HI | 2.8343  |
| LRP8      | (S,S)-6_HI | 2.7475  |
| LRRD1     | (S,S)-6_HI | 3.2604  |
| LSS       | (S,S)-6_HI | 3.928   |

---

---

|                |            |         |
|----------------|------------|---------|
| MAF            | (S,S)-6_HI | 5.5669  |
| MAFG           | (S,S)-6_HI | 2.7324  |
| MALAT1         | (S,S)-6_HI | 3.3044  |
| MAP1A          | (S,S)-6_HI | 5.9987  |
| MAP1B          | (S,S)-6_HI | 2.3865  |
| MLLT11         | (S,S)-6_HI | 2.3172  |
| MMAB           | (S,S)-6_HI | 3.0765  |
| MSMO1          | (S,S)-6_HI | 3.8137  |
| MVD            | (S,S)-6_HI | 8.8991  |
| MVK            | (S,S)-6_HI | 3.6993  |
| MXD1           | (S,S)-6_HI | 1.9931  |
| NDRG4          | (S,S)-6_HI | 3.4375  |
| NEU1           | (S,S)-6_HI | 3.9699  |
| NEUROG2        | (S,S)-6_HI | 5.5463  |
| NFKBIA         | (S,S)-6_HI | 2.0794  |
| NPC2           | (S,S)-6_HI | 2.3008  |
| NPDC1          | (S,S)-6_HI | 2.1615  |
| NSDHL          | (S,S)-6_HI | 3.1224  |
| NXPE3          | (S,S)-6_HI | 2.1096  |
| OPTN           | (S,S)-6_HI | 3.8478  |
| OSGIN1         | (S,S)-6_HI | 6.112   |
| PANX2          | (S,S)-6_HI | 3.5853  |
| PHF1           | (S,S)-6_HI | 3.081   |
| PLA2G16        | (S,S)-6_HI | 2.5933  |
| PNPLA3         | (S,S)-6_HI | 4.754   |
| POMT2          | (S,S)-6_HI | 2.1067  |
| PPP1R15A       | (S,S)-6_HI | 6.212   |
| PPP2R5B        | (S,S)-6_HI | 2.6898  |
| PROX1          | (S,S)-6_HI | 2.0861  |
| PSAP           | (S,S)-6_HI | 2.2535  |
| QPRT           | (S,S)-6_HI | 2.3306  |
| RAB15          | (S,S)-6_HI | 3.0855  |
| RELB           | (S,S)-6_HI | 17.5232 |
| RENBP          | (S,S)-6_HI | 5.22    |
| RND1           | (S,S)-6_HI | 3.6006  |
| RP11-265D19.6  | (S,S)-6_HI | 4.6137  |
| RP11-284F21.10 | (S,S)-6_HI | 4.9095  |
| RP11-390P2.4   | (S,S)-6_HI | 3.6155  |
| RP11-395B7.7   | (S,S)-6_HI | 2.9018  |
| RP11-443P15.2  | (S,S)-6_HI | 5.2555  |
| RP5-1024G6.8   | (S,S)-6_HI | 2.9508  |
| RP5-850E9.3    | (S,S)-6_HI | 2.167   |
| RRAGC          | (S,S)-6_HI | 2.0283  |
| S100A6         | (S,S)-6_HI | 2.0705  |
| SC5D           | (S,S)-6_HI | 2.7321  |

---

---

|           |            |        |
|-----------|------------|--------|
| SCARNA22  | (S,S)-6_HI | 2.7001 |
| SCD       | (S,S)-6_HI | 2.9975 |
| SDCBP     | (S,S)-6_HI | 2.1132 |
| SEL1L3    | (S,S)-6_HI | 2.4861 |
| SERPINF1  | (S,S)-6_HI | 2.056  |
| SESN2     | (S,S)-6_HI | 2.5016 |
| SIPA1L2   | (S,S)-6_HI | 2.1281 |
| SLC16A3   | (S,S)-6_HI | 5.5172 |
| SLC25A16  | (S,S)-6_HI | 2.5041 |
| SLC2A3    | (S,S)-6_HI | 3.1954 |
| SLC2A6    | (S,S)-6_HI | 2.6181 |
| SLC36A1   | (S,S)-6_HI | 2.2807 |
| SLC38A2   | (S,S)-6_HI | 2.0693 |
| SLC38A6   | (S,S)-6_HI | 2.2647 |
| SLC7A11   | (S,S)-6_HI | 4.1788 |
| SNAI3-AS1 | (S,S)-6_HI | 6.8746 |
| SQLE      | (S,S)-6_HI | 2.6462 |
| SQSTM1    | (S,S)-6_HI | 5.3332 |
| SRXN1     | (S,S)-6_HI | 2.2349 |
| STARD4    | (S,S)-6_HI | 4.0455 |
| STAT2     | (S,S)-6_HI | 2.5237 |
| STX3      | (S,S)-6_HI | 3.1633 |
| SYNE2     | (S,S)-6_HI | 2.352  |
| SYT2      | (S,S)-6_HI | 5.2602 |
| TBC1D9    | (S,S)-6_HI | 1.9919 |
| TES       | (S,S)-6_HI | 2.8091 |
| TMEM2     | (S,S)-6_HI | 2.3277 |
| TMEM55B   | (S,S)-6_HI | 2.8658 |
| TMEM63B   | (S,S)-6_HI | 2.1617 |
| TP53INP2  | (S,S)-6_HI | 2.0959 |
| TRIB3     | (S,S)-6_HI | 2.6126 |
| TSC22D3   | (S,S)-6_HI | 4.1307 |
| TUBA1A    | (S,S)-6_HI | 2.5922 |
| UAP1L1    | (S,S)-6_HI | 2.2814 |
| UBC       | (S,S)-6_HI | 2.3261 |
| VEGFA     | (S,S)-6_HI | 3.0189 |
| VWA5A     | (S,S)-6_HI | 4.0982 |
| WNT9A     | (S,S)-6_HI | 2.6243 |
| YPEL5     | (S,S)-6_HI | 1.9396 |
| FAM195A   | (S,S)-6_LO | 0.4053 |
| FUK       | (S,S)-6_LO | 0.3545 |
| ACAT2     | (S,S)-6_LO | 3.7492 |
| ARHGEF9   | (S,S)-6_LO | 2.0189 |
| C14orf1   | (S,S)-6_LO | 1.9715 |
| CYP51A1   | (S,S)-6_LO | 2.4049 |

---

|           |            |        |
|-----------|------------|--------|
| DHCR24    | (S,S)-6_LO | 2.0807 |
| DHCR7     | (S,S)-6_LO | 2.1388 |
| EBP       | (S,S)-6_LO | 1.8331 |
| ELOVL6    | (S,S)-6_LO | 2.0769 |
| FADS1     | (S,S)-6_LO | 1.8837 |
| FADS2     | (S,S)-6_LO | 1.8222 |
| FDFT1     | (S,S)-6_LO | 2.4838 |
| FDPS      | (S,S)-6_LO | 2.5827 |
| HMGCR     | (S,S)-6_LO | 2.5977 |
| HMGCS1    | (S,S)-6_LO | 5.0219 |
| HSD17B7   | (S,S)-6_LO | 3.7338 |
| HSD17B7P2 | (S,S)-6_LO | 3.495  |
| IDI1      | (S,S)-6_LO | 2.6648 |
| INSIG1    | (S,S)-6_LO | 3.7241 |
| LRRD1     | (S,S)-6_LO | 2.3418 |
| LSS       | (S,S)-6_LO | 3.0803 |
| MMAB      | (S,S)-6_LO | 2.1291 |
| MSMO1     | (S,S)-6_LO | 3.3877 |
| MVD       | (S,S)-6_LO | 3.0871 |
| MVK       | (S,S)-6_LO | 2.2178 |
| NEUROG2   | (S,S)-6_LO | 2.8444 |
| NSDHL     | (S,S)-6_LO | 2.2227 |
| PNPLA3    | (S,S)-6_LO | 2.3546 |
| SC5D      | (S,S)-6_LO | 2.1587 |
| SCD       | (S,S)-6_LO | 2.2016 |
| SQLE      | (S,S)-6_LO | 2.0534 |
| STARD4    | (S,S)-6_LO | 2.9088 |
| TUBA1A    | (S,S)-6_LO | 2.064  |

**Table S-5:** Gene expression changes in HAP1 cells upon incubation with **18** and **(S,S)-6** at 10  $\mu$ M (HI) and 1  $\mu$ M (LO). Differentially expressed genes (“gene signatures”) compared to the DMSO control were determined.

## V) Non-denaturing Mass-Spectrometry

A sample of KDM2A was buffer-exchanged into 200 mM ammonium acetate and diluted to a concentration of 2.5  $\mu$ M for analysis. (S,S)-6 was dissolved in DMSO to a concentration of 10 mM, further diluted with 200 mM ammonium acetate and mixed at a 1:1 v/v ratio with KDM2A to give final concentrations of 2.5  $\mu$ M and 12.5  $\mu$ M for KDM2A and (S,S)-6 respectively. The sample was then equilibrated at room temperature for 30 minutes before MS analysis. Data were acquired on a quadrupole time-of-flight (TOF) mass spectrometer (Synapt G1 HDMS, Waters Corp., Wilmslow, UK) using nanoelectrospray ionisation, and with instrument settings optimised for the transmission of intact noncovalent protein complexes.<sup>18</sup> Experiments were

conducted in positive polarity and TOF mode, with the following instrument settings: capillary voltage 1.4 kV, sample cone 10 V, “trap” collision voltage 10 V (40 V for tandem MS dissociation spectrum), “transfer” collision voltage 5 V, source pressure 4.0 mbar, and the collision cell pressures 10  $\mu$ bar.

## VI) Mode of Action Studies

### 2-OG Competition

Solutions containing H3K36me2 peptide (20  $\mu$ M),  $\text{Fe}^{\text{II}}(\text{NH}_4)\text{SO}_4$  (20  $\mu$ M), sodium-L-ascorbate (200  $\mu$ M), and 2-OG (0.4  $\mu$ M, 0.8  $\mu$ M, 1.2  $\mu$ M, 2.0  $\mu$ M, 4.0  $\mu$ M, 6.0  $\mu$ M) in MES buffer (pH 7.0) were prepared in a deep 96-well plate (total volume per well = 600  $\mu$ L). A solution of KDM2A in MES buffer (50 mM MES, 100 mM NaCl [pH 7.0]) was prepared (total volume = 12 mL) and divided equally into 3 falcon tubes, to which was added (S,S)-6 (tube A (solution A): 0 nM, tube B (solution B): 500 nM, tube C (solution C): 1000 nM). After incubation at 0  $^\circ$ C for 45 min, 600  $\mu$ L of solution A was added to each well, and the progress of demethylation was monitored *via* automated sampling using the RapidFire mass spectrometry platform (Agilent Technologies, Wakefield MA). The relative concentrations of H3K36me0 (where observed) and H3K36me1 were determined by integration of the extracted ion chromatogram corresponding to the H3K36me0/1 peptides using MassHunter software (Agilent Technologies). This procedure was repeated with solutions B and C using freshly-prepared 2-OG wells. Initial rates were determined by calculating the slope of the linear region of the reaction. Kinetic parameters are apparent values due to non-saturating conditions used.

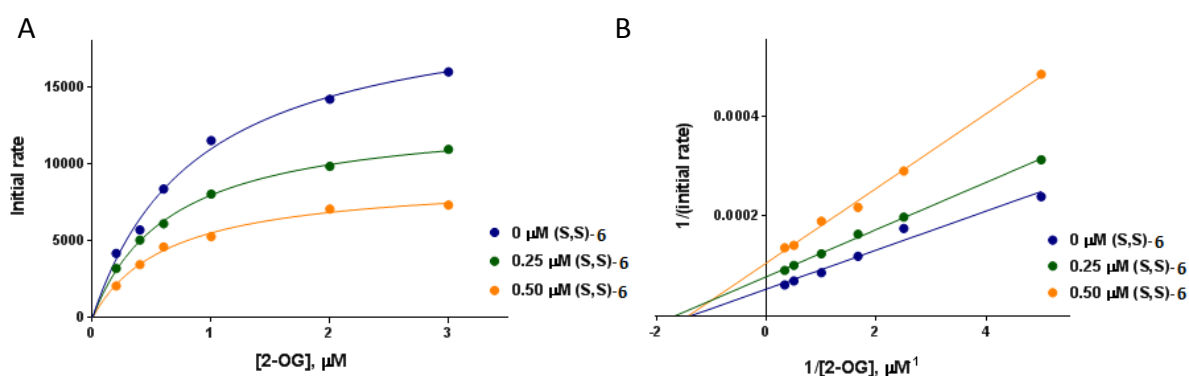

**Figure S-5** – A) Michaelis-Menten plot of [2-OG] vs. initial rate of peptide demethylation. The concentration of the peptide substrate is 10  $\mu$ M. Mixed-mode inhibition fit gives  $K_M^{\text{app}}$  (2OG) =  $0.88 \pm 0.08$   $\mu$ M,  $K_I^{\text{app}} = 0.9 \pm 0.3$   $\mu$ M;  $\alpha = 0.45 \pm 0.21$ ,  $R^2 = 0.9908$  (B) Lineweaver-Burke plot

## Peptide Competition

Solutions containing 2-OG (20  $\mu\text{M}$ ),  $\text{Fe}^{\text{II}}(\text{NH}_4)\text{SO}_4$  (20  $\mu\text{M}$ ), sodium-L-ascorbate (200  $\mu\text{M}$ ), and H3K36me2 peptide (2  $\mu\text{M}$ , 4  $\mu\text{M}$ , 10  $\mu\text{M}$ , 20  $\mu\text{M}$ , 32  $\mu\text{M}$ , 80  $\mu\text{M}$ ) in MES buffer (pH 7.0) were prepared in a deep 96-well plate (total volume per well = 600  $\mu\text{L}$ ). A solution of KDM2A in MES buffer (50 mM MES, 100 mM NaCl [pH 7.0]) was prepared (total volume = 12 mL) and divided equally into 3 falcon tubes, to which was added (**S,S**)-6 (tube A (solution A): 0 nM, tube B (solution B): 500 nM, tube C (solution C): 1000 nM). After incubation at 0  $^\circ\text{C}$  for 45 min, 600  $\mu\text{L}$  of solution A was added to each well, and the progress of demethylation was monitored *via* automated sampling using the RapidFire mass spectrometry platform (Agilent Technologies, Wakefield MA). The relative concentration of H3K36me1 was determined by integration of the extracted ion chromatogram corresponding to the H3K36me1 peptide using MassHunter software (Agilent Technologies). This procedure was repeated with solutions B and C using freshly-prepared peptide wells. Initial rates were determined by calculating the slope of the linear region of the reaction. Kinetic parameters are apparent values due to non-saturating conditions used in the assay.

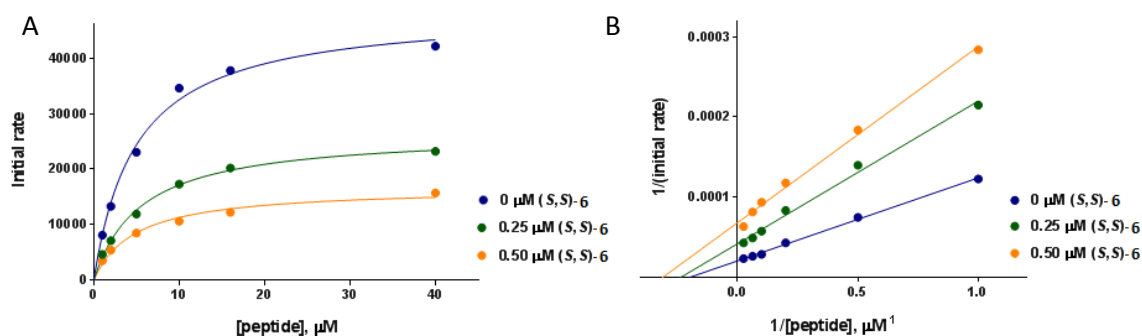

**Figure S-6** – A) Michaelis-Menten plot of [peptide] vs. initial rate of peptide demethylation. The concentration of the 2-OG cosubstrate is 10  $\mu\text{M}$ . Mixed-mode inhibition fit gives  $K_{\text{M}}^{\text{app}}$  (H3K36me2) =  $5.0 \pm 0.39 \mu\text{M}$ ,  $K_{\text{I}}^{\text{app}} = 0.26 \pm 0.05 \mu\text{M}$ ;  $\alpha = 1.1 \pm 0.3$ ,  $R^2 = 0.9914$ . B) Lineweaver-Burke plot.

## Fluorescence Polarisation assay with Methylstat<sup>Fluoro</sup>

Fluorescence polarization competition assay with methylstat<sup>fluoro</sup> for KDM2A was carried out as described [25]. Detailed KDM7A and KDM7B FP assay optimization and methods will be reported elsewhere. In brief, assays were carried out in 384-well, black, non-binding microplate (Greiner Bio-One) at 22  $^\circ\text{C}$ . KDM7s (150 nM

KDM7A, 600 nM KDM7B or 50 nM KDM7C) were incubated with 12.5 nM methylstat<sup>fluoro</sup> or 50 nM H3<sub>(1-15)</sub>K4Me3K9Me2-FITC, 100 μM NiSO<sub>4</sub>, and compounds at various concentrations in 50 mM Hepes buffer (pH7.0), containing 50 mM NaCl and 0.1% Tween 20. Enzyme was not pre-incubated with compounds to avoid stabilising effect. The plate was incubated in the dark for 30 minutes and analysed by PheraStar (BMG).

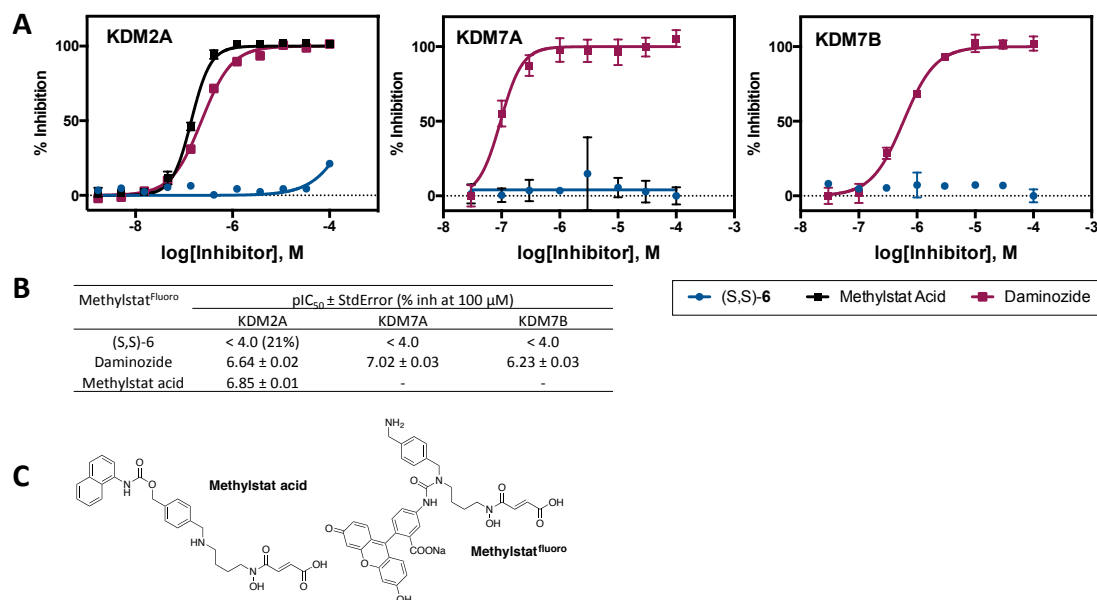

**Figure S-7 – Fluorescence Polarisation competition assay with Methylstat<sup>Fluoro</sup>.** (A) FP competition assay with methylstat<sup>fluoro</sup> for KDM2A, KDM7A and KDM7B with (S,S)-6 and control inhibitors. (B) pIC<sub>50</sub> values calculated for methylstat<sup>Fluoro</sup> competition assay. (C) Structures of methylstat and methylstat<sup>Fluoro</sup>.

## VII) Photoaffinity Labelling

### Photoaffinity Labelling of KDM2A with 127

A solution containing KDM2A (1 μM), 127 (4 μM), NiCl<sub>2</sub> (50 μM), and 2-OG (10 μM) was prepared using MES buffer (50 mM MES, 100 mM NaCl [pH 7.0]) and incubated at 0 °C for 45 min. The solution was irradiated in 60 μL aliquots with 350 nm uv-light at 1-4 °C using a CaproBox™ (Caprotec, Berlin). Irradiation times longer than 5 min were carried out in 5 min pulses, separated by 2 min intervals to prevent sample warming. Samples were analyzed by liquid-chromatography/mass-spectrometry.

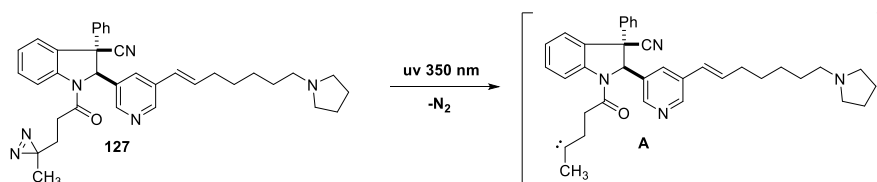

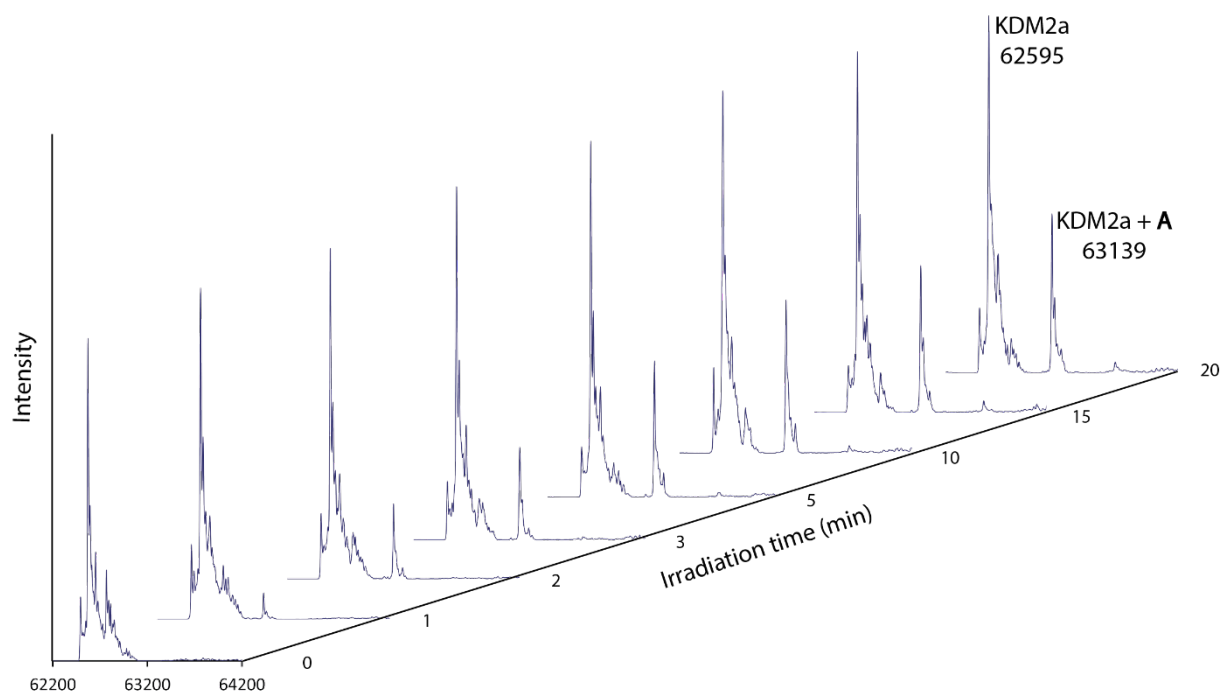

**Figure S-8** – Progress of KDM2A photo-crosslinking by **127** as a function of irradiation time assessed by mass spectrometry.

### Distribution of photo-crosslinked residues

To map photo-crosslinked amino acid residues by **127** within the KDM2A protein, samples were digested in-solution with elastase, followed by analysis by liquid chromatography tandem mass spectrometry (LC-MS/MS) as described previously.<sup>[31]</sup> MS data analysis and identification of uv cross-linking sites was performed using PEAKS Studio software (v7.5). Complete coverage of the KDM2A sequence was achieved.

```

MEPEEERIRYSQRLRGTMRRRYEDDGI SDDEIFGKRTFDLEEKLHTNKYNANFVTFMEGKDFNVEYIQRGGLRDPLIFKNSDGLGIKMPDPDFTVNDVKMCVG
SRRMVIMDVNTQKGIEMTMAQWTRYYETPEEEREKLYNVISLEFSHTRLENMVQRSPSTVDFIDWVDNMWPRHLKESQTESTNAILEMQYPKVQKYCLMSVRG
CYTDPHVDFGGTSVWYHIHQGGKVFVWLIPTTAHNLELYENLLSRKQGDIFLGDRVSDCQRIELKQGYTFVIPSQWIIHAVYTPDITLVFGGNPLHSFNIPMQL
KIYNIEDRTRVFNKFRYPFYEMCWVLERVYVYVITNRSHLTKEFKESLDLELNGLESNGNDEEAVDREPRRLSSRRSVLTSPVANGVNL DYEGLGKTCRSL
PSLKKTLAGDSSSDCIRGSHNGQVWDPQCAPRKDRQVHLTHFELEGLRCLVDKLESPLHKKCVPTGIEDEDALIADVKILLEELANSDPKALATGVPIVQWP

```

**Figure S-9** – Sequence of KDM2A construct used for all experiments, including photoaffinity labelling. Residues highlighted in red were covalently modified by **127** upon uv irradiation. Residues highlighted in yellow are exposed within the enzyme



active site (i.e. in close proximity to the peptide substrate or 2-OG). The residue highlighted in green is both exposed within the enzyme active site and undergoes photolabelling by **127**.

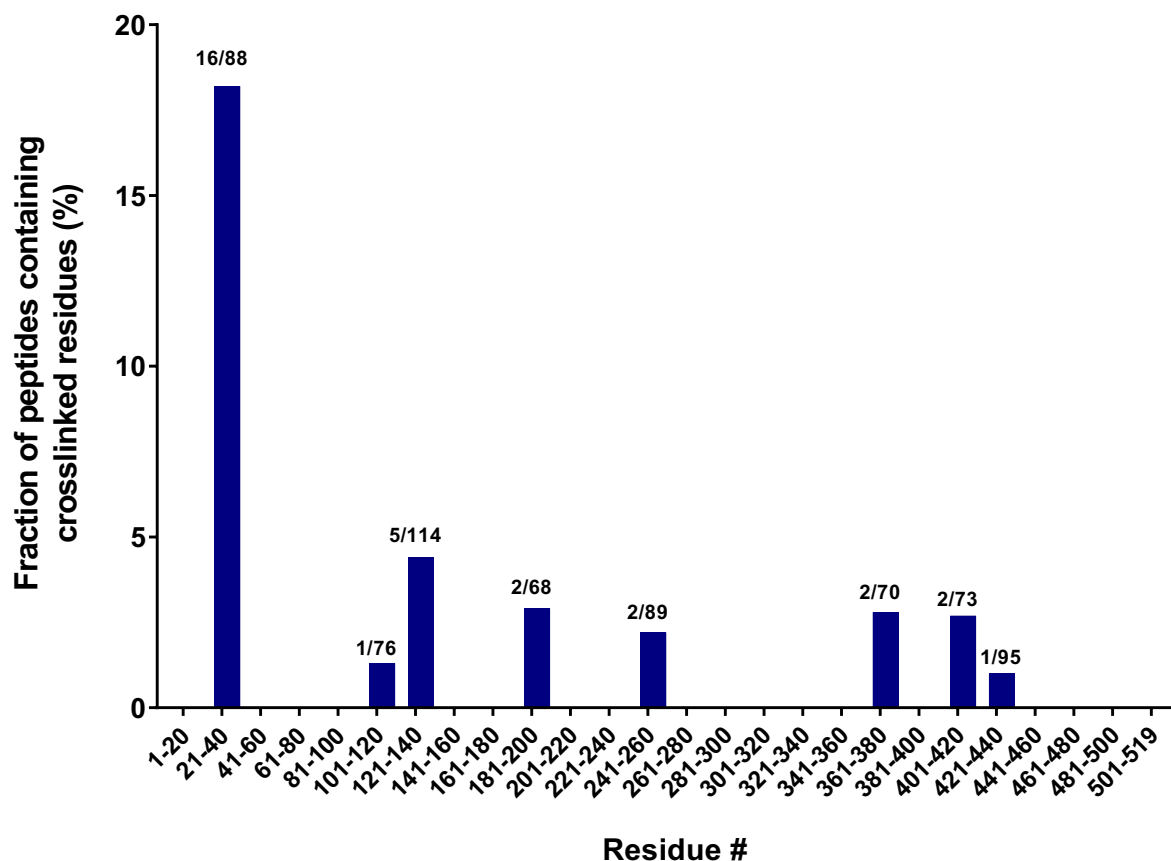

**Figure S-10** – Distribution of labelled peptides, showing apparent preference for photo-crosslinking of residues near the protein *N*-terminus. Observed ratios of labelled to unlabelled peptides as analysed using PEAKS are displayed above each bar.

## VIII) Computational Docking

Compounds were docked into the published KDM2A structure (PDB ID 2YU1) using the MolSoft ICM [30]. The Dock Table function in the Advanced mode of the ligedit menu was used. Three poses were kept from a docking run with thoroughness of 20. Representative poses for compounds **1** and (*S,S*)-**6** are shown overlaid with the structure of mouse KDM2A, H3.2 and *N*-oxalyl glycine [31] in Figure S-11. Although the pyrido-indole

and -indoline tails fill different parts of the peptide binding pocket, docking places the alkyl pyrrolidine moiety in the same region as the quarternary trimethyl lysine substrate.

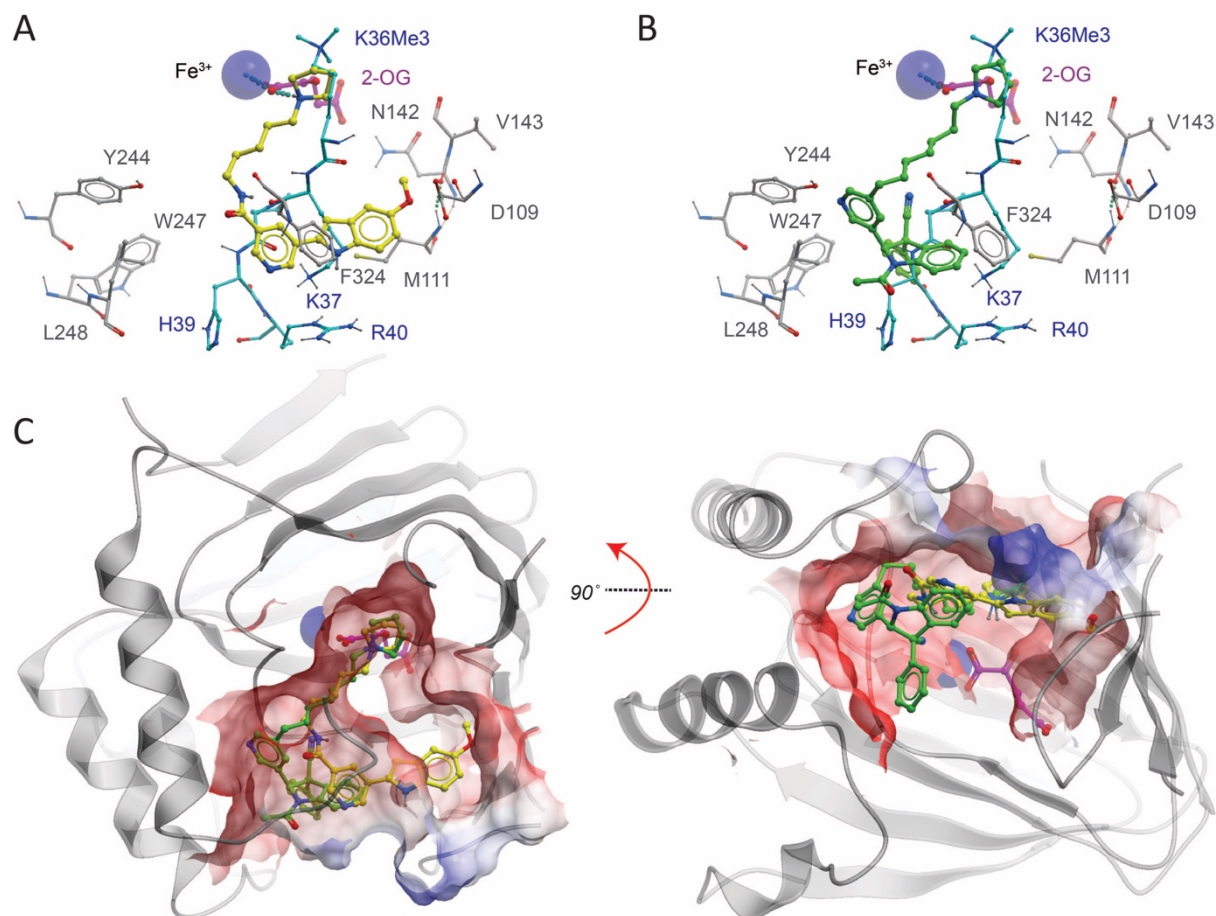

**Figure S-11:** Computational docking of compounds in the KDM2A peptide binding pocket using MolSoft ICM. A. Overlay of compound **1** (yellow ball and stick) and H3.2 (cyan sticks from PDB ID 4QXB) in 2-OG (magenta ball and stick from PDB ID 2YU1) bound KDM2A (grey stick from PDB ID 2YU1). B. Overlay of compound **(S,S)-6** (green ball and stick) as in A. C. Electrostatic surface view of compounds **1** and **(S,S)-6** binding to the histone substrate pocket of KDM2A (grey ribbon from PDB ID 2YU1).

## IX) NMR Spectra

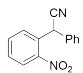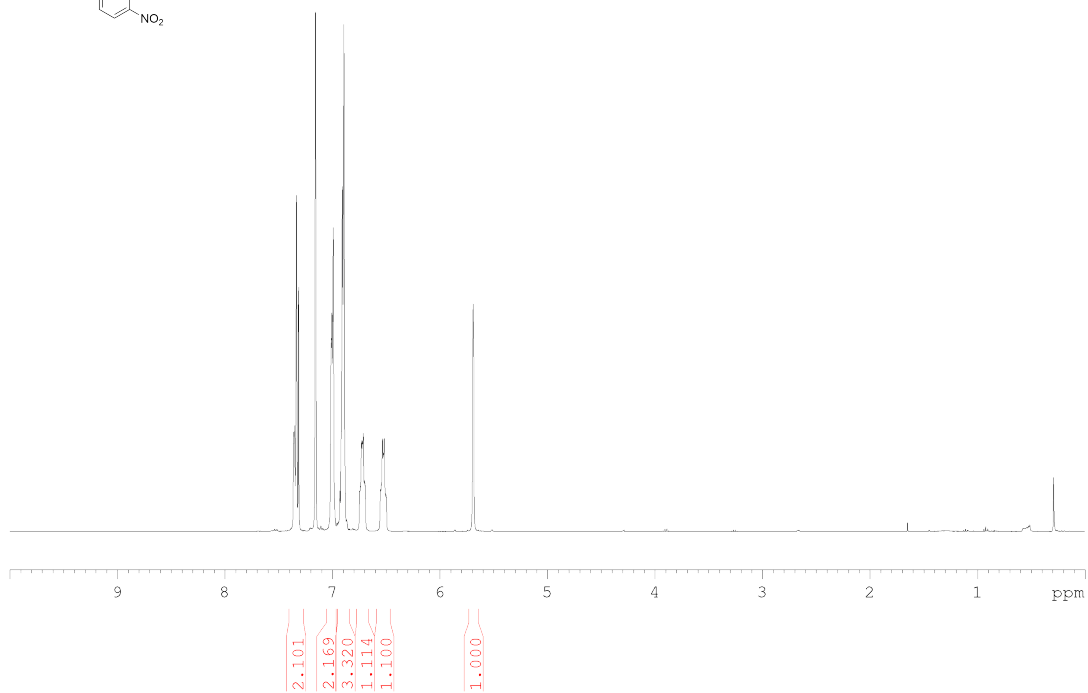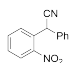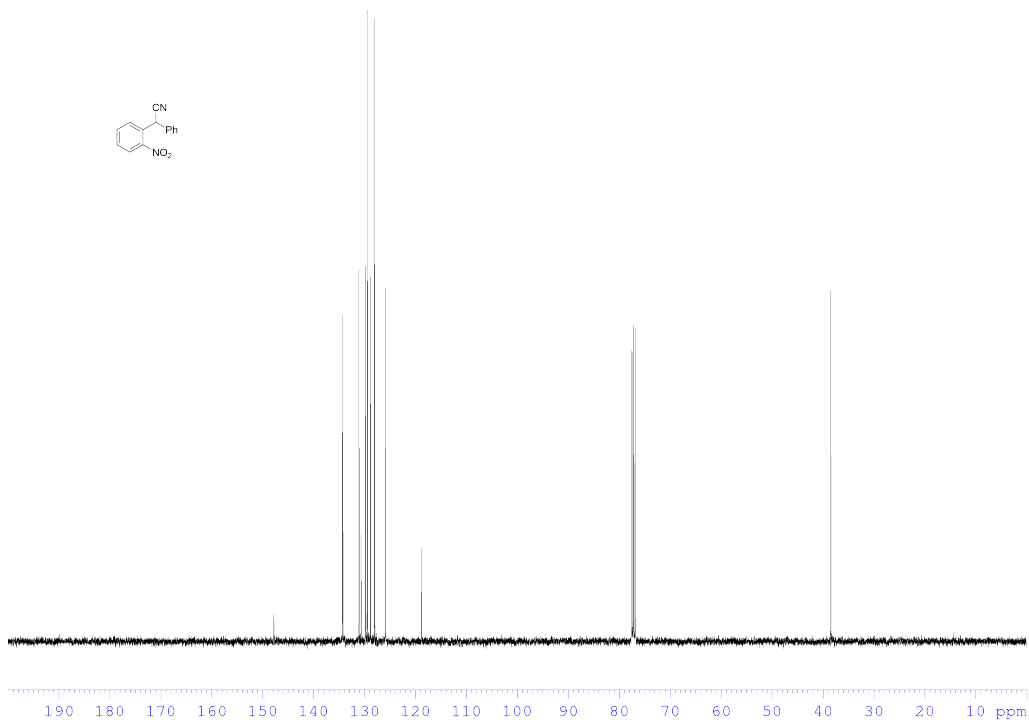

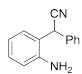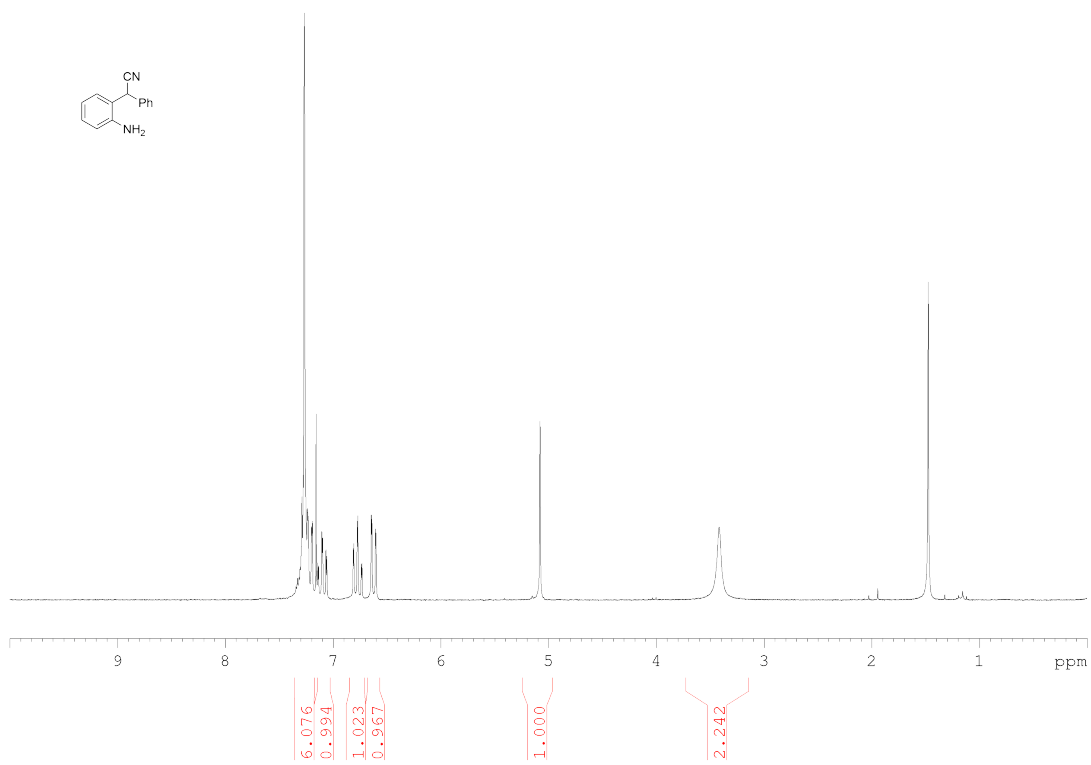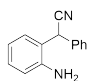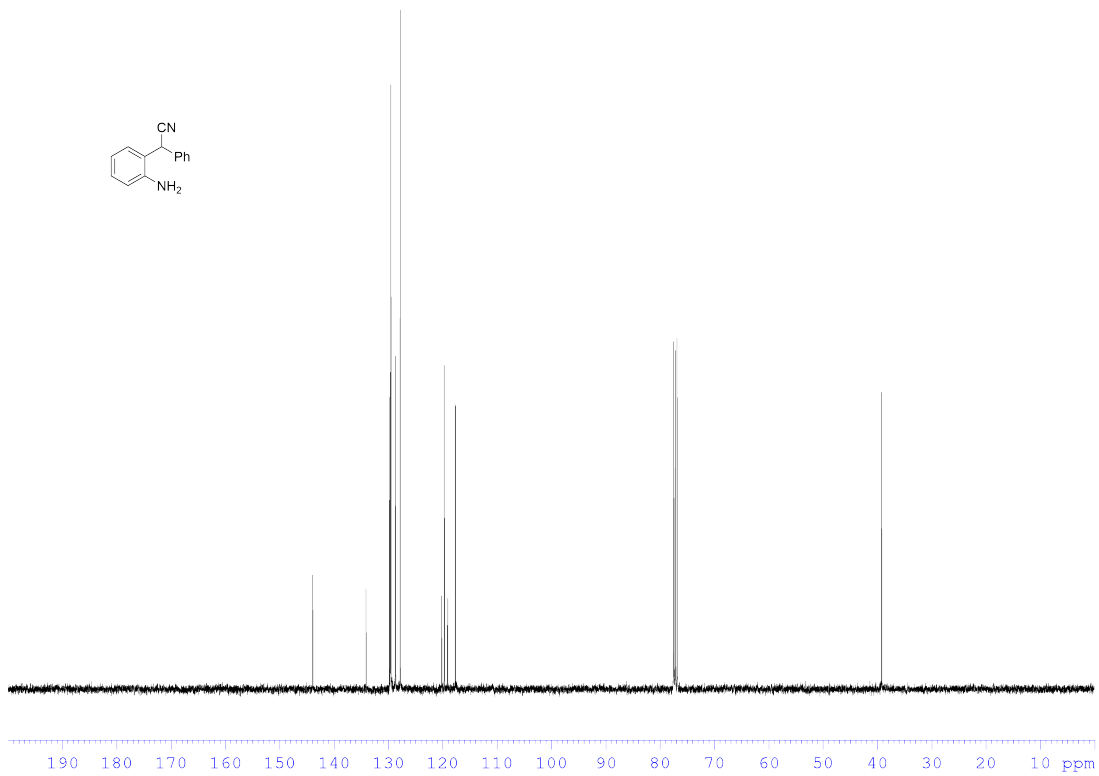

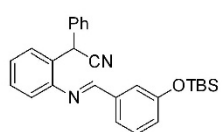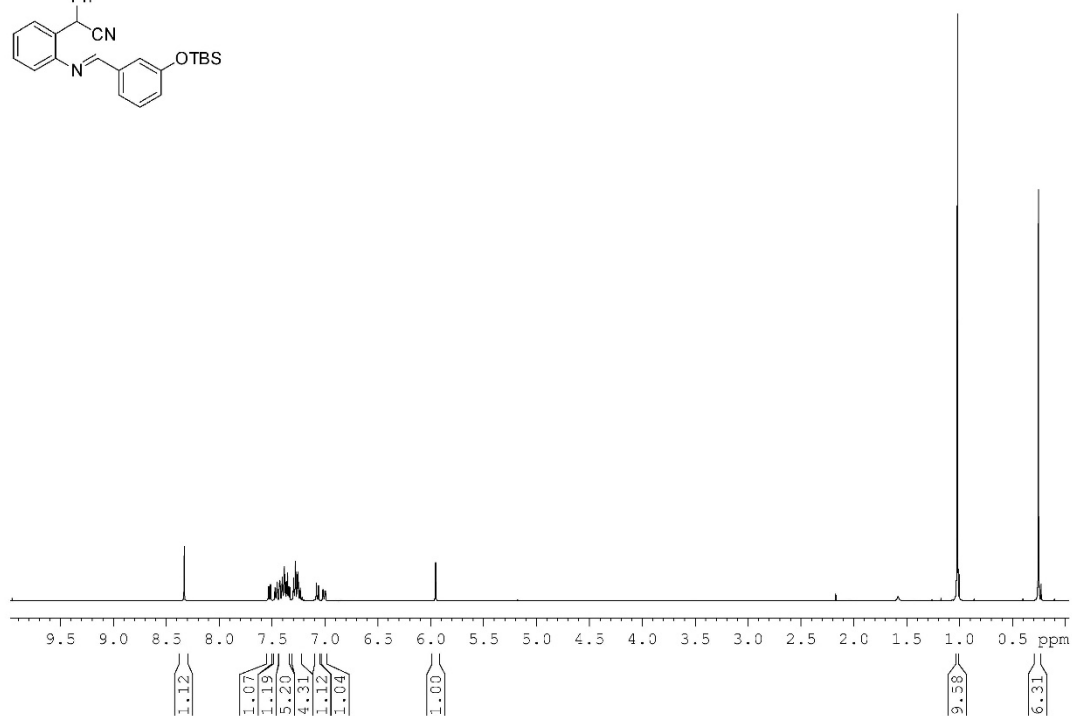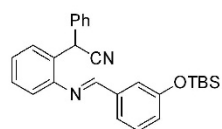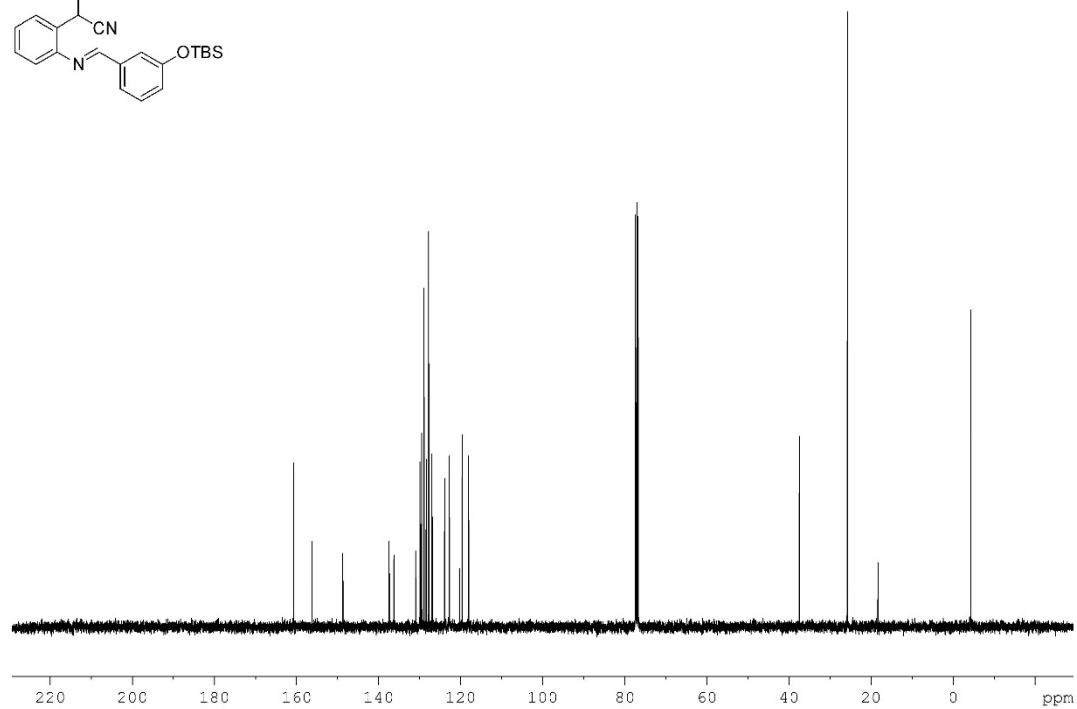

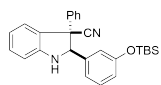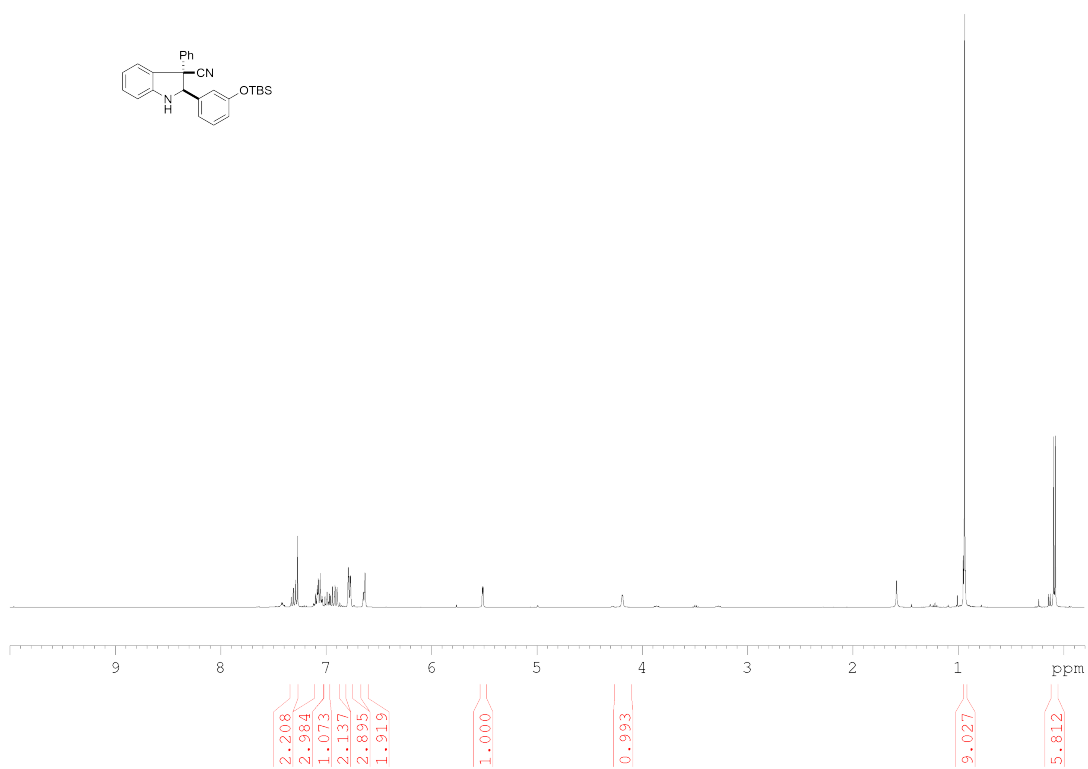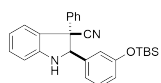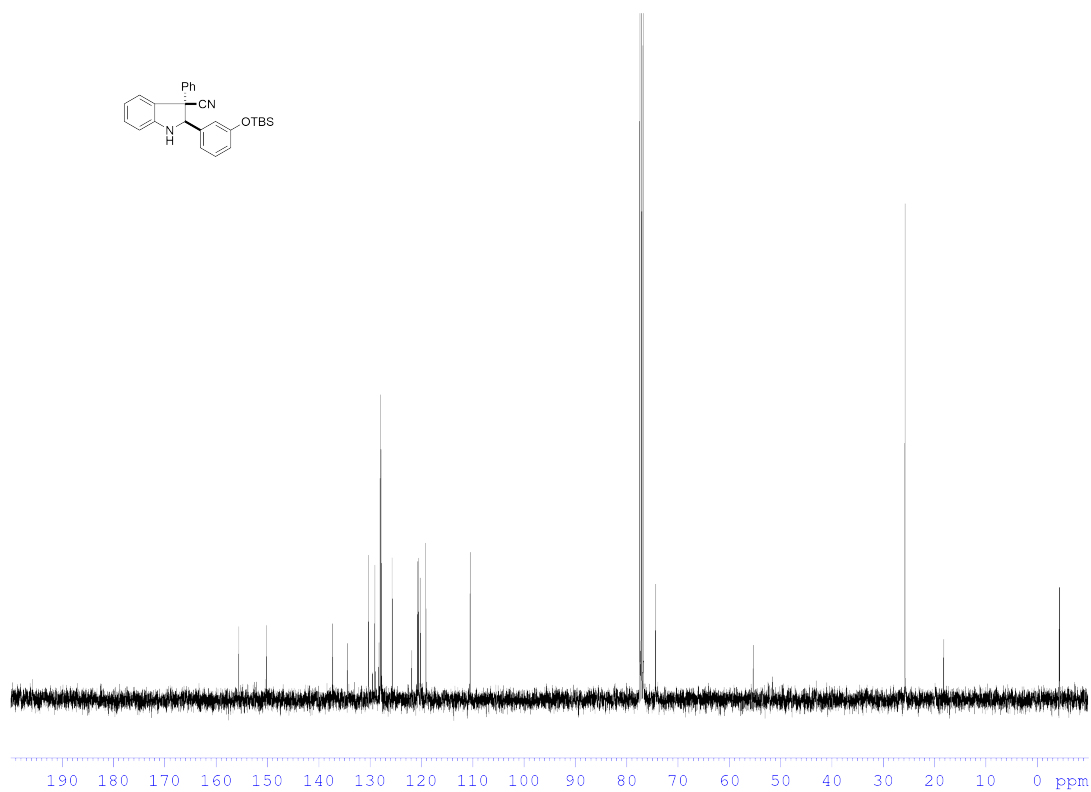

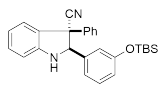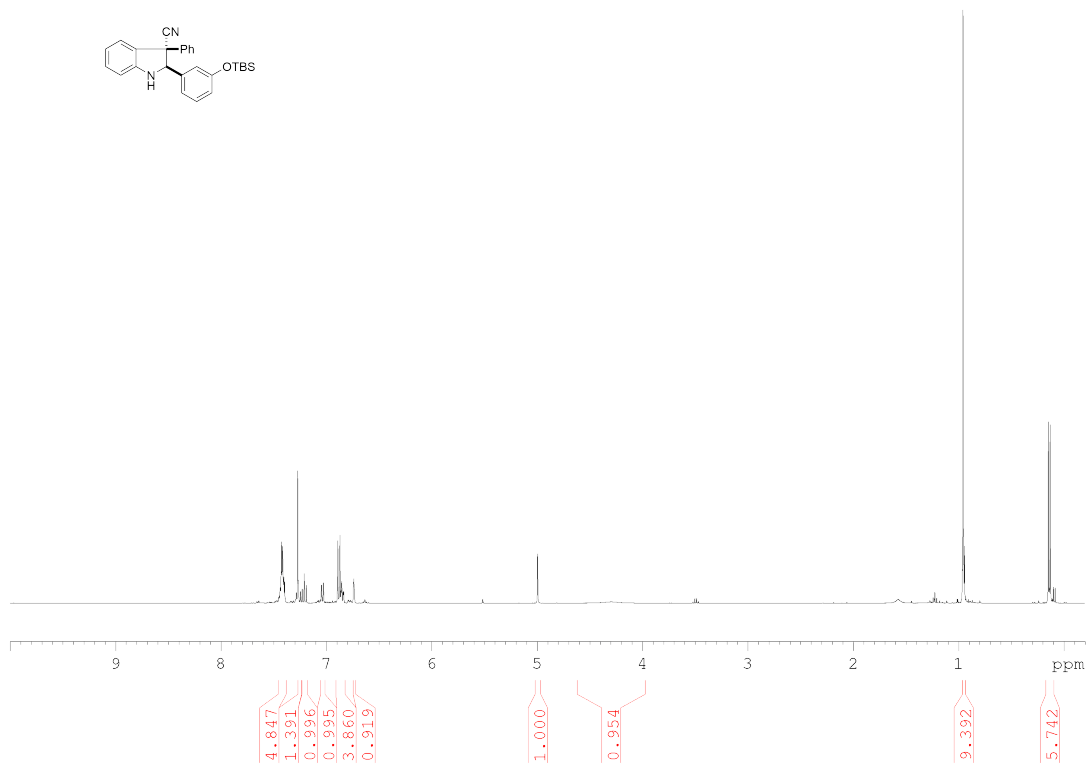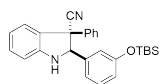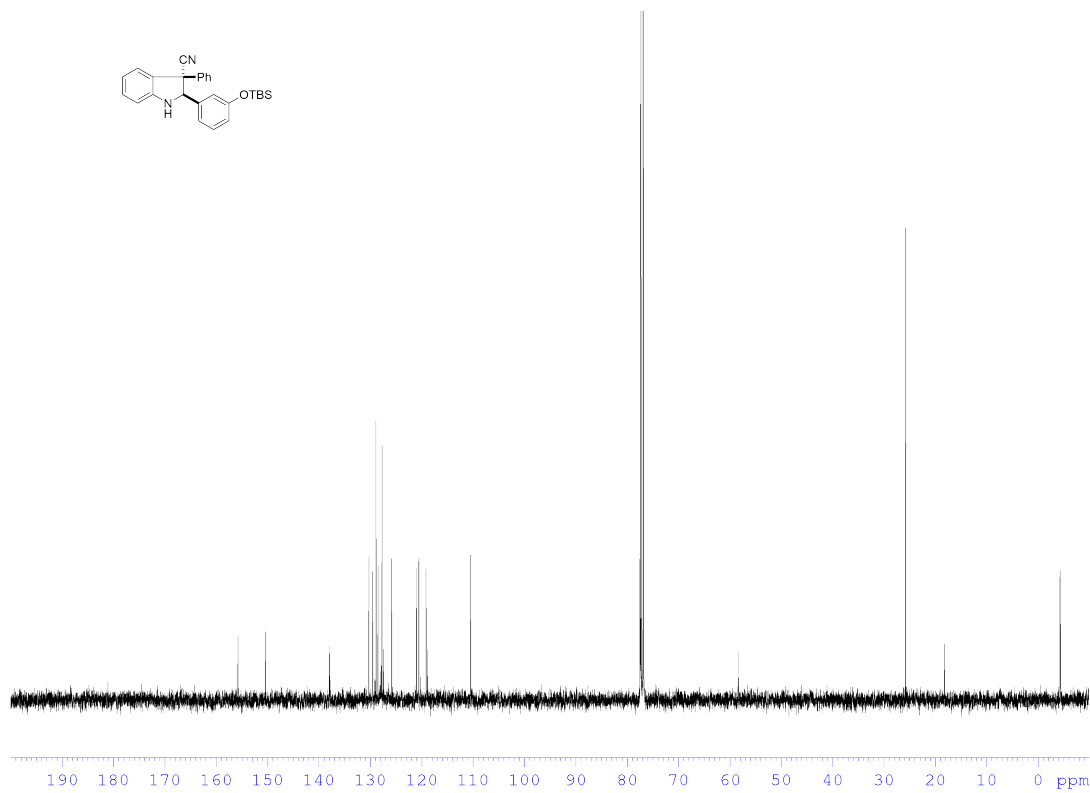

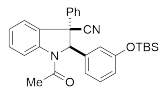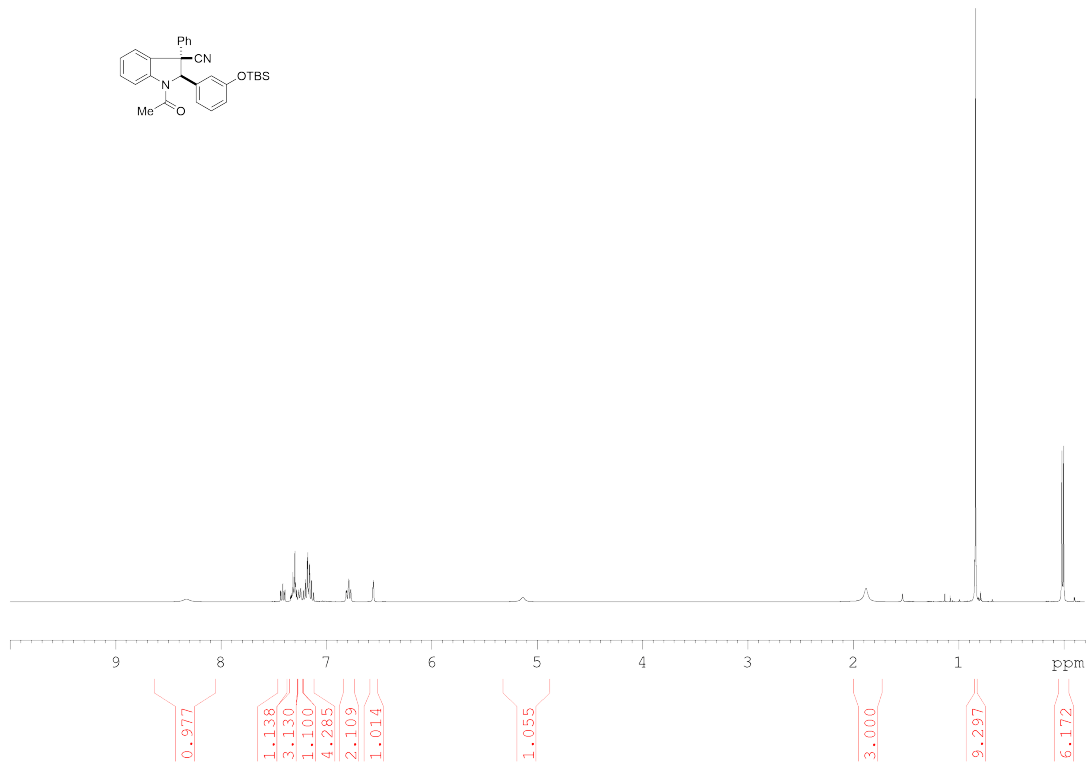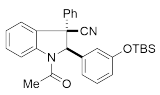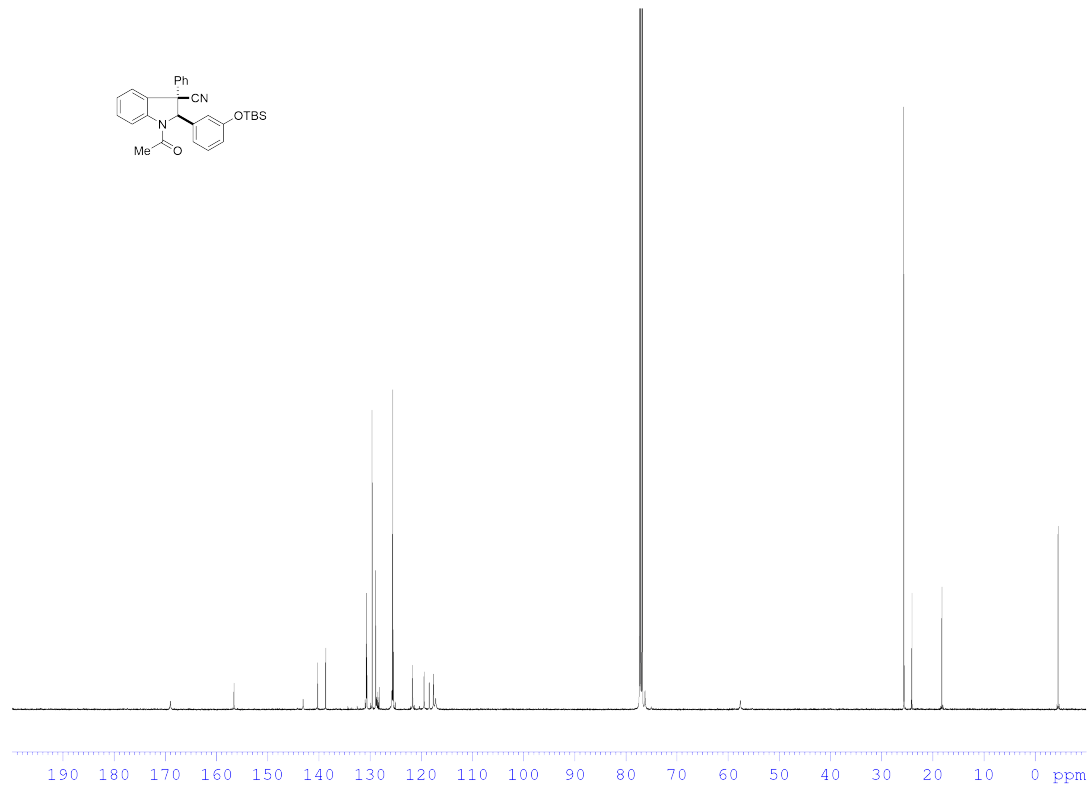



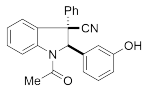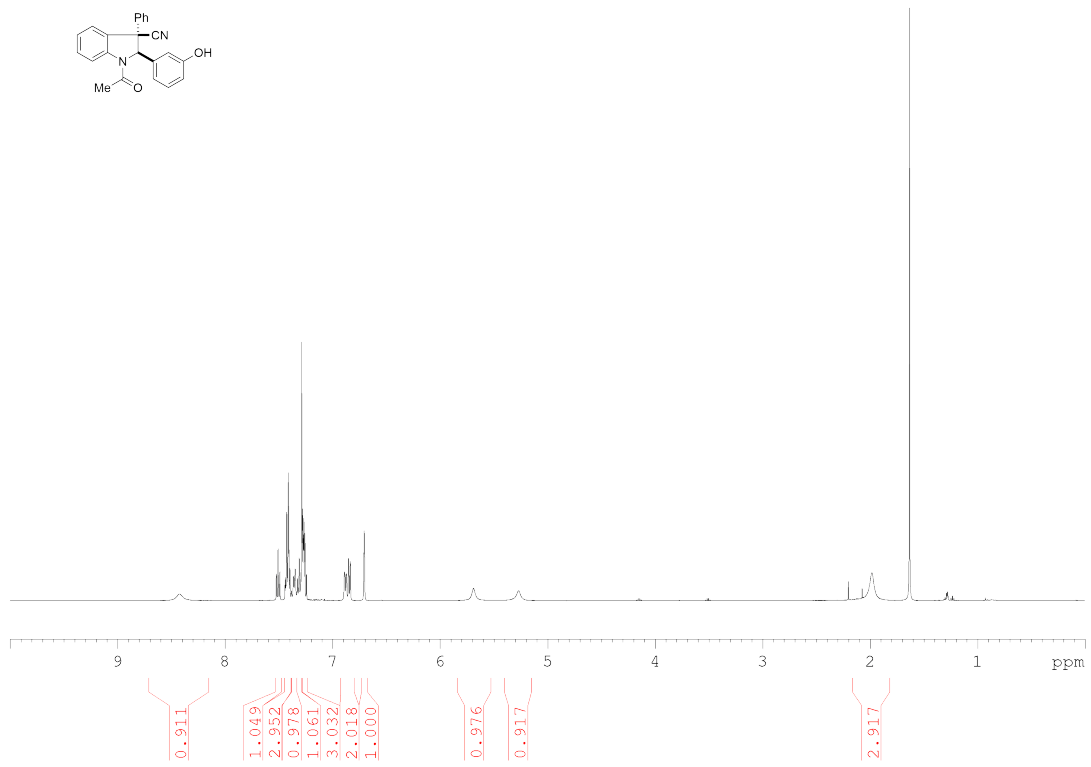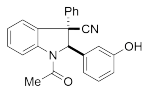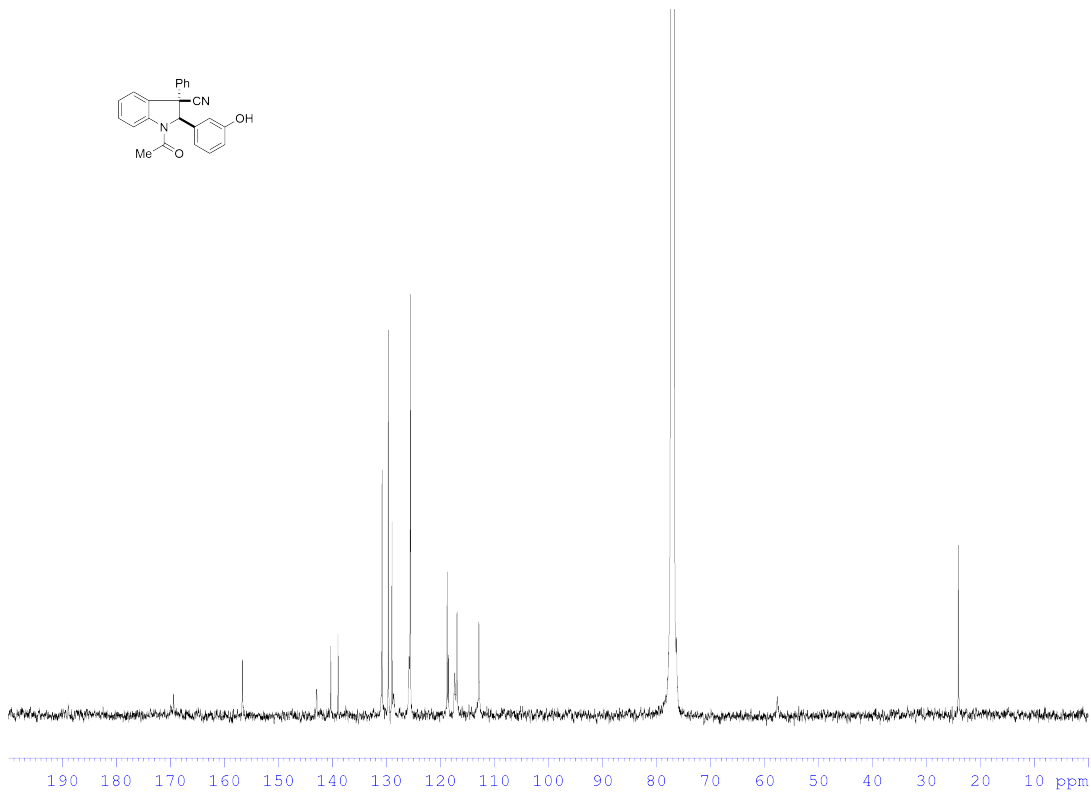

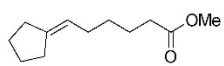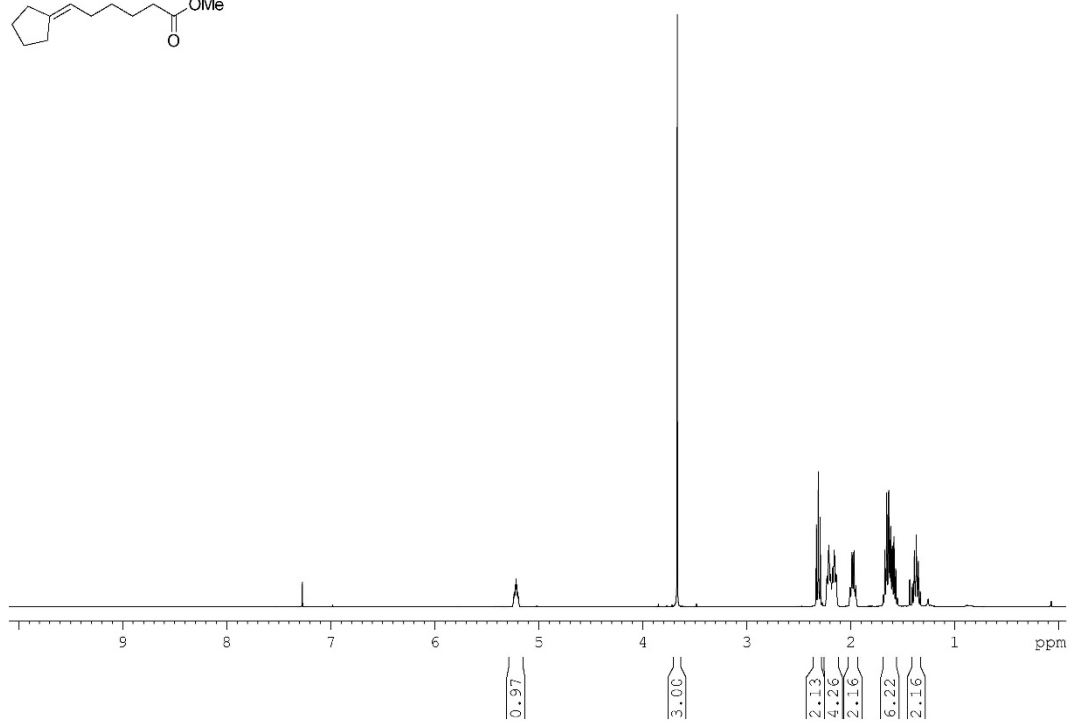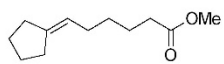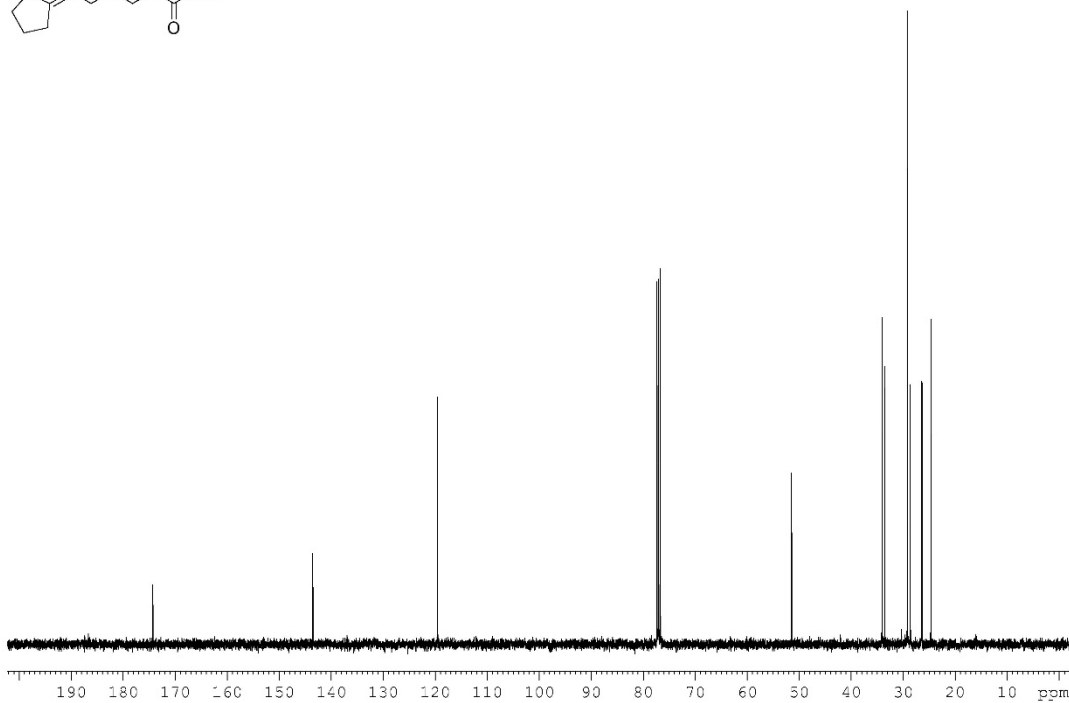

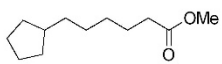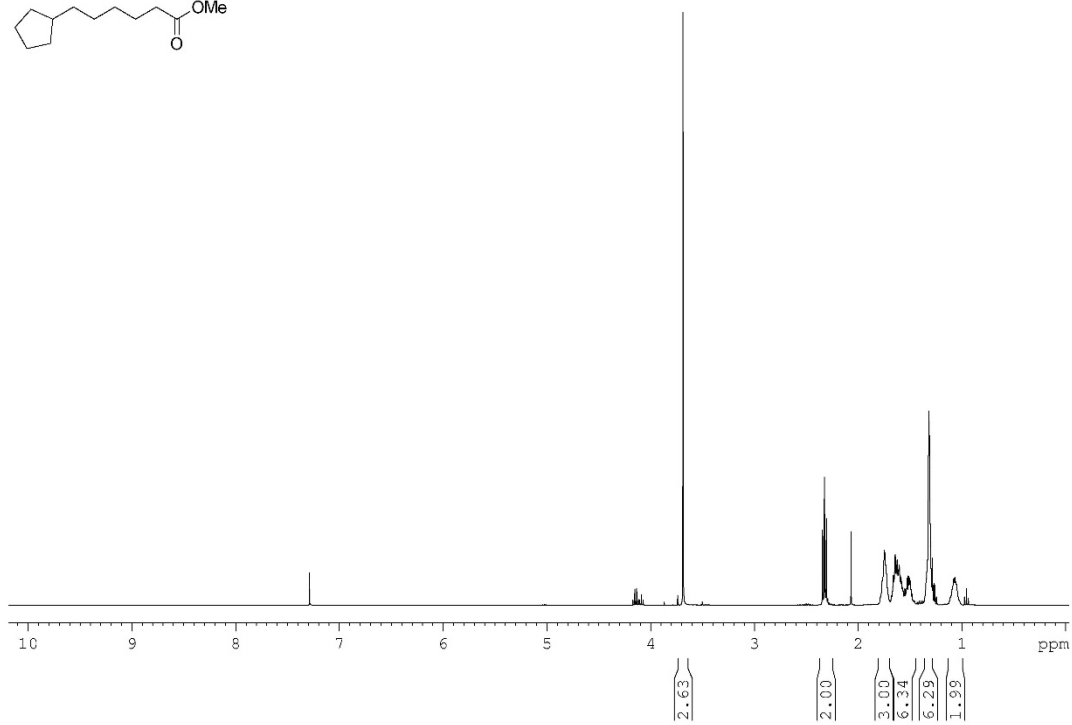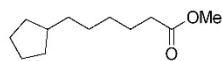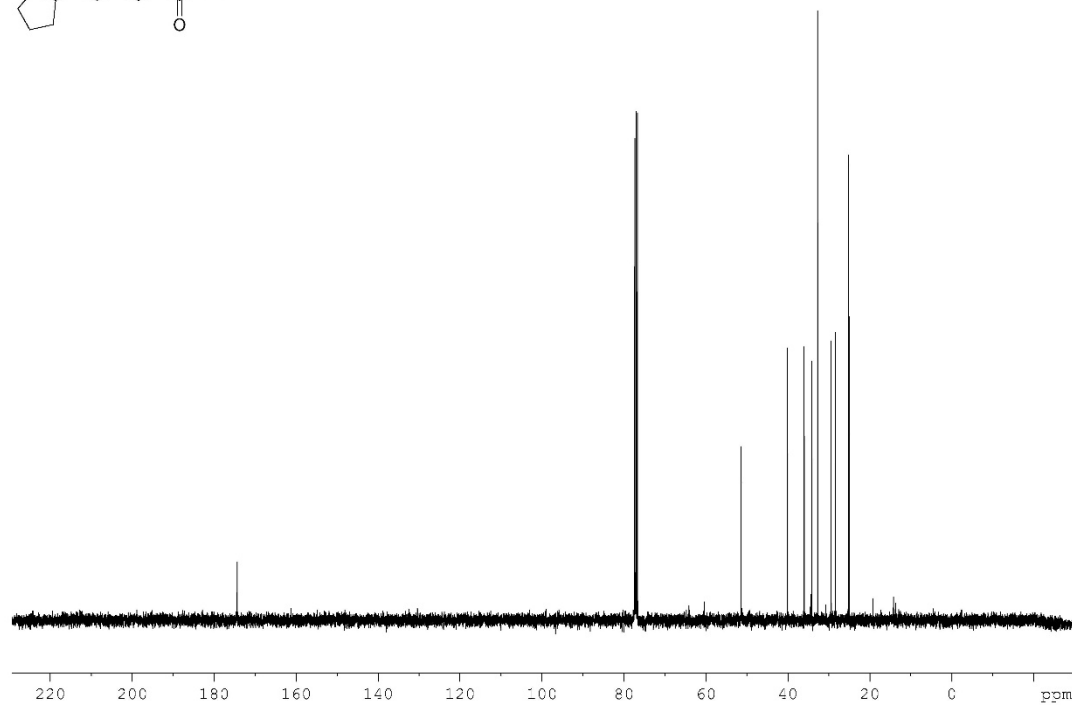

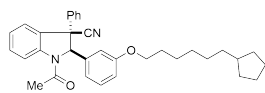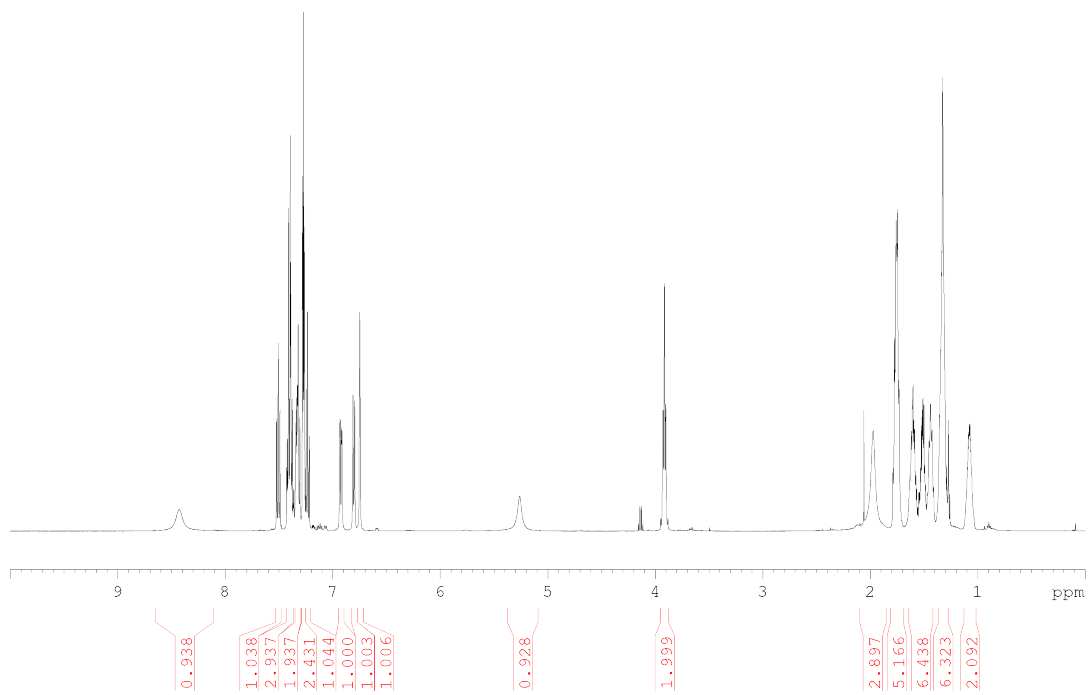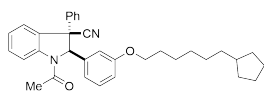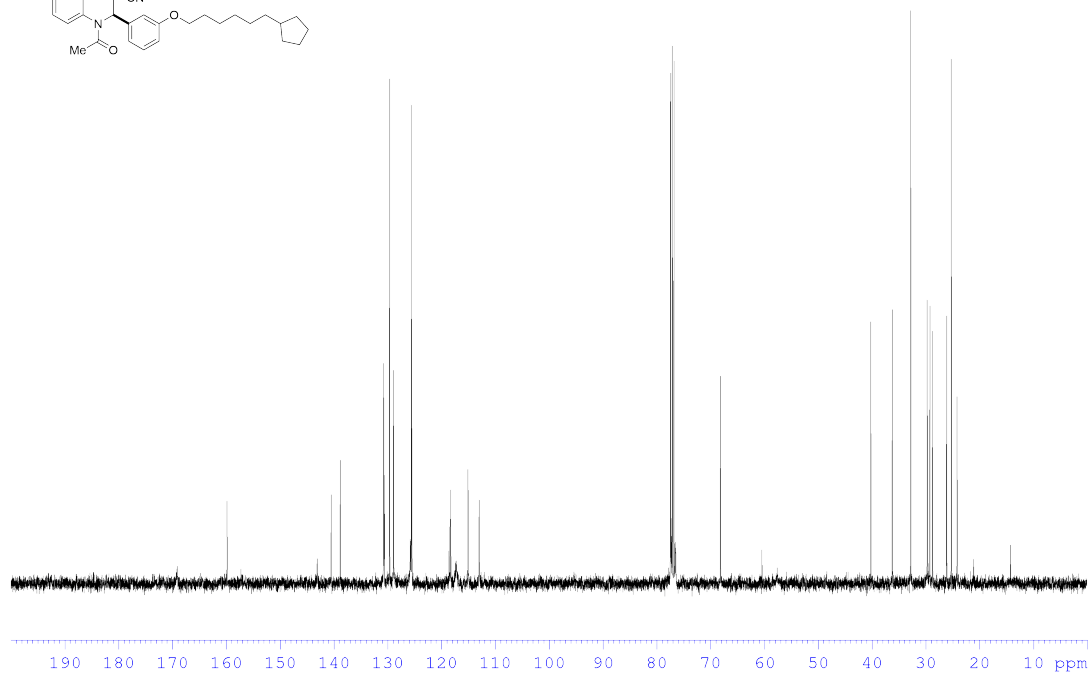

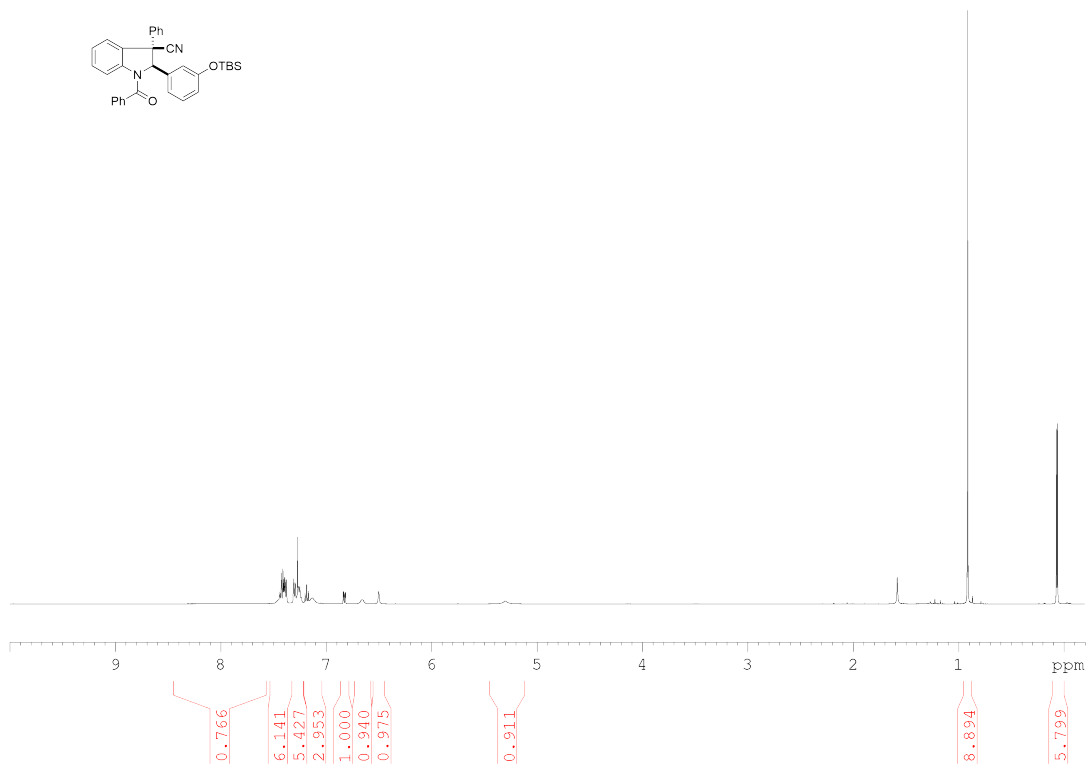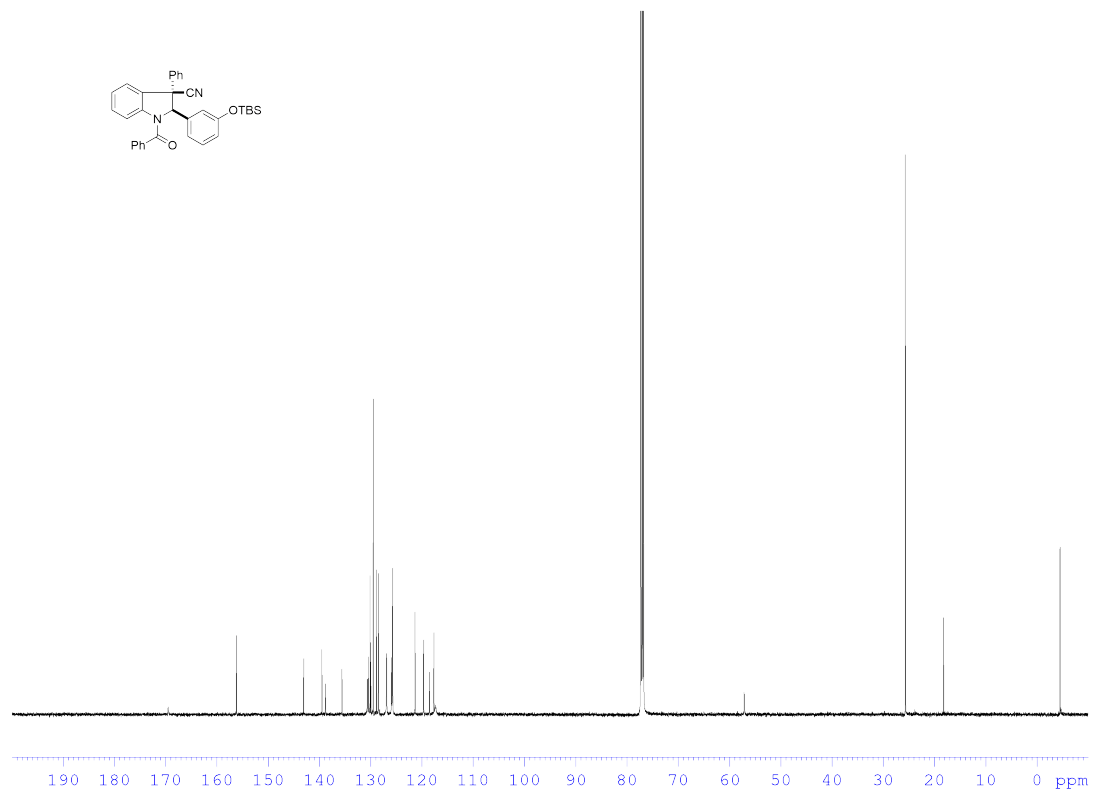

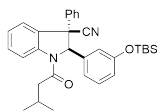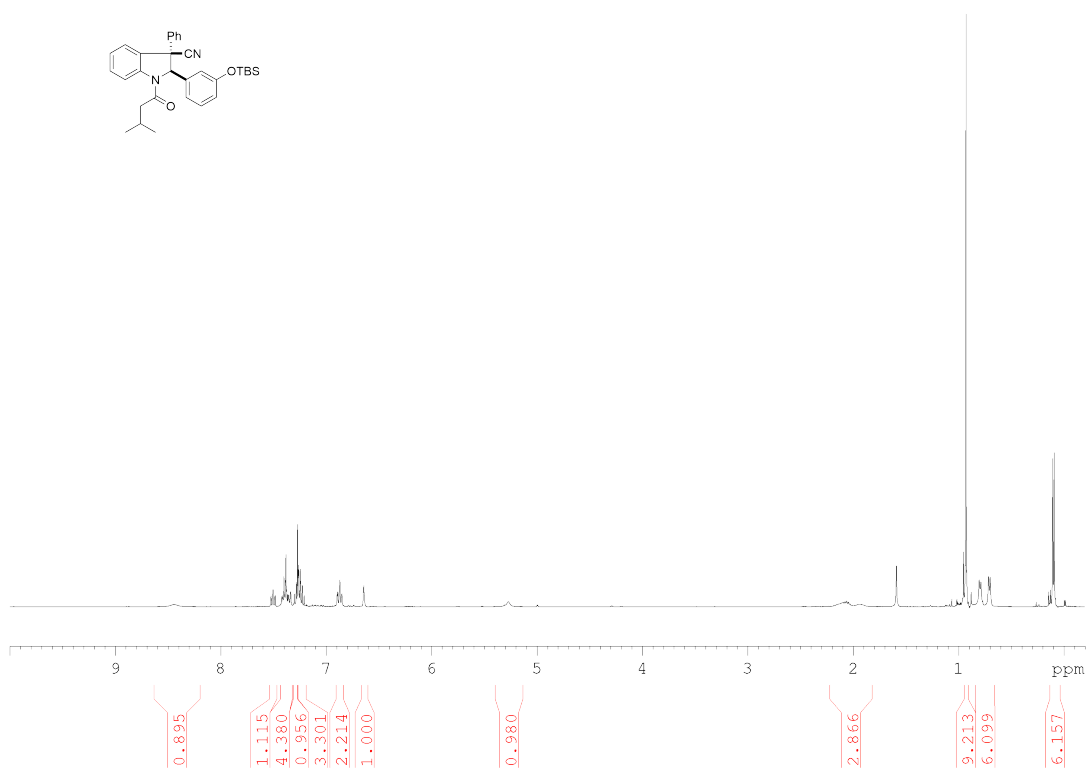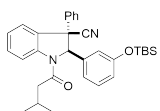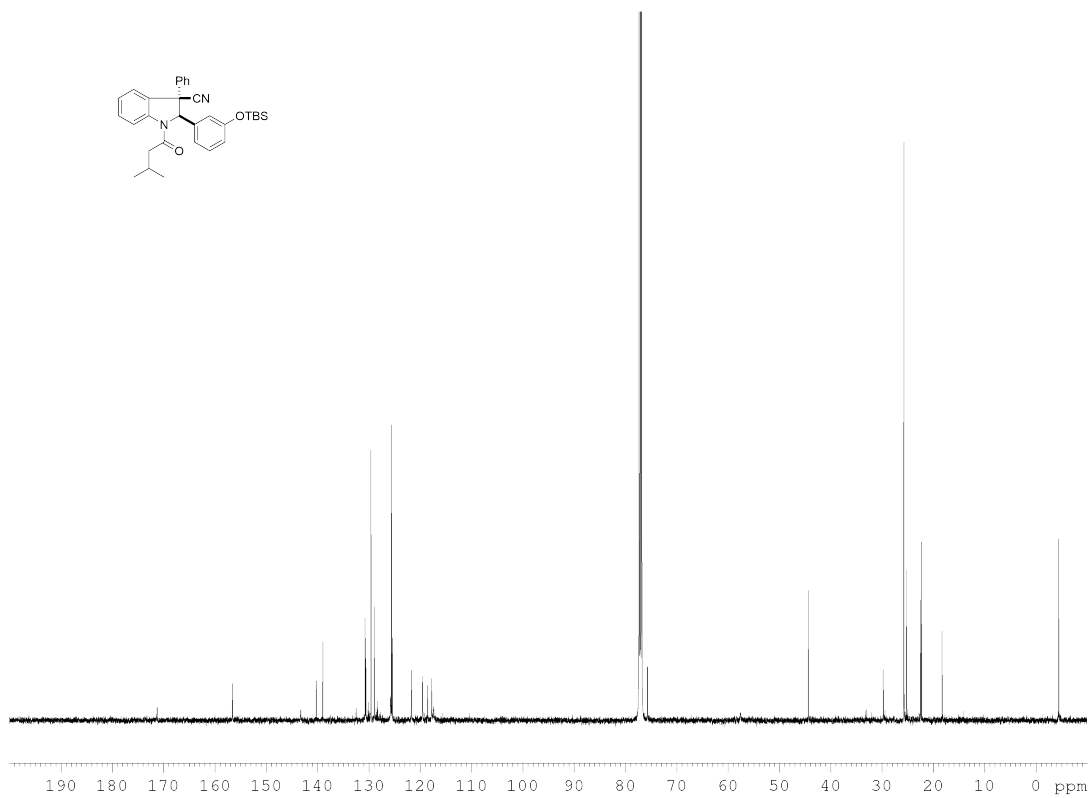

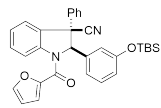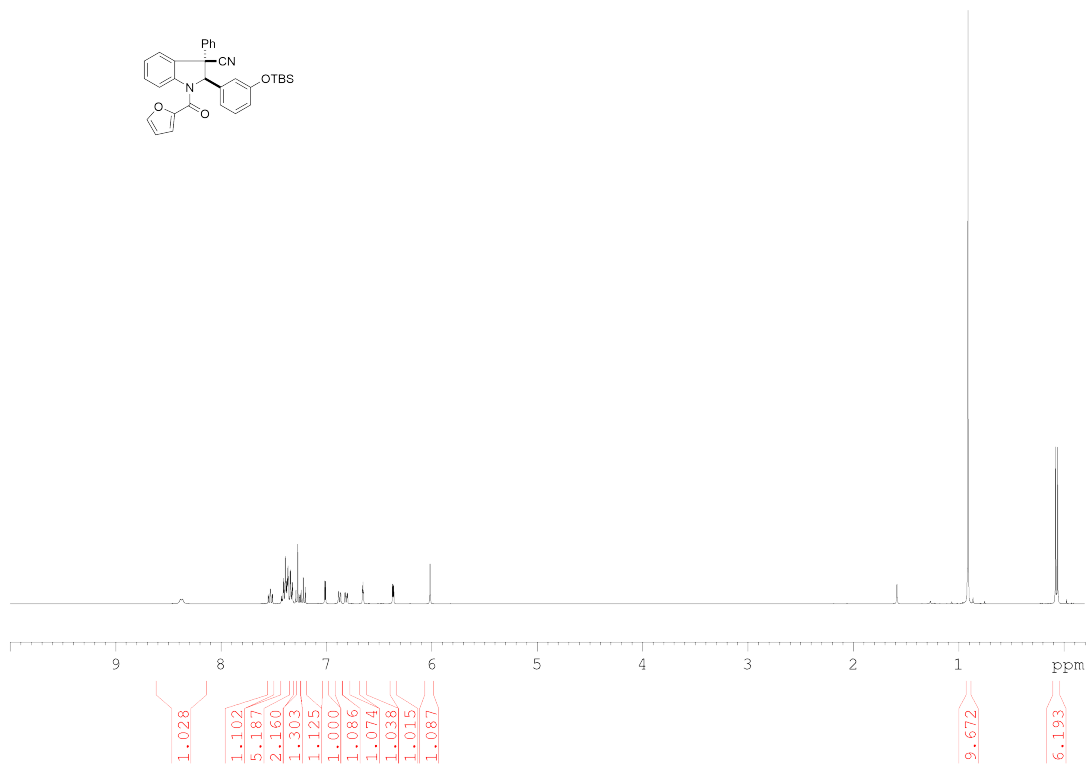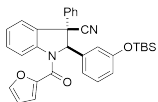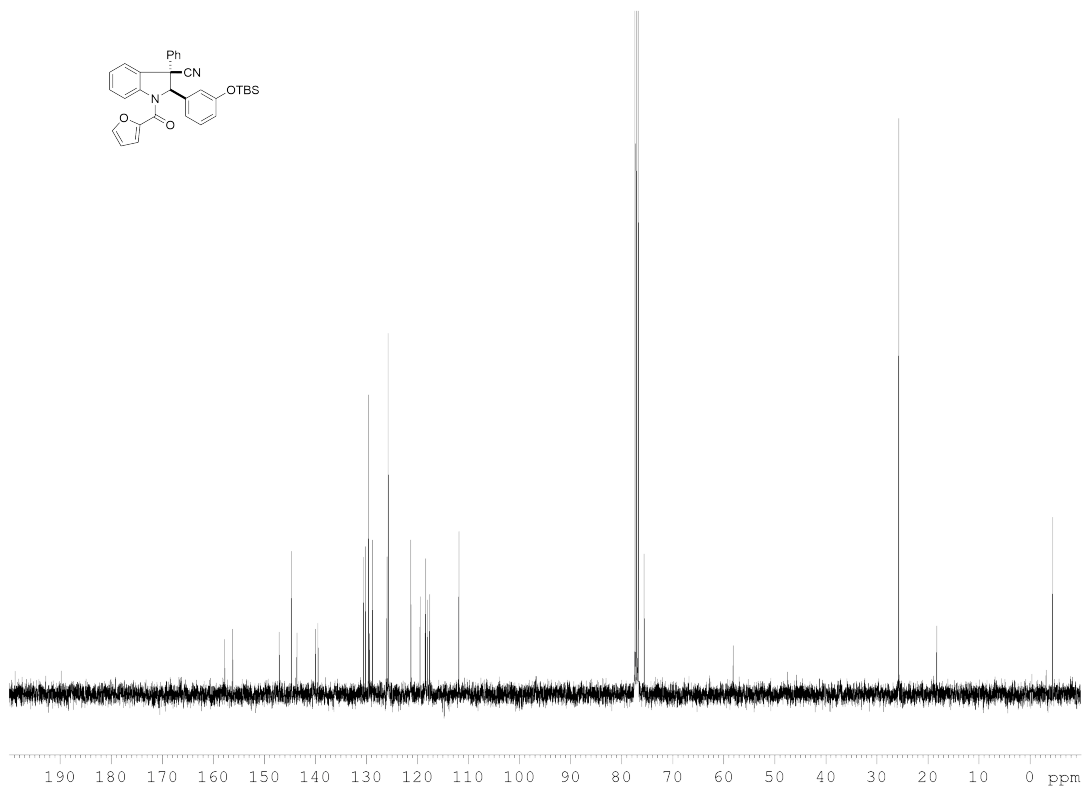

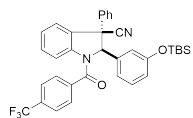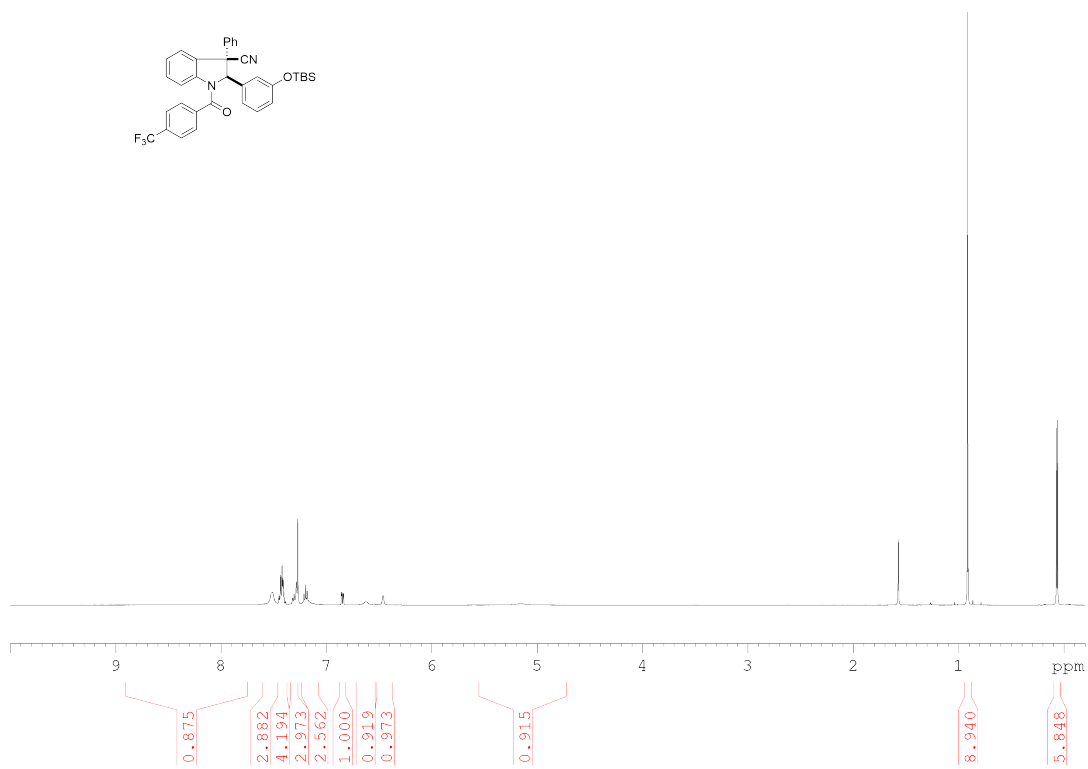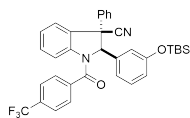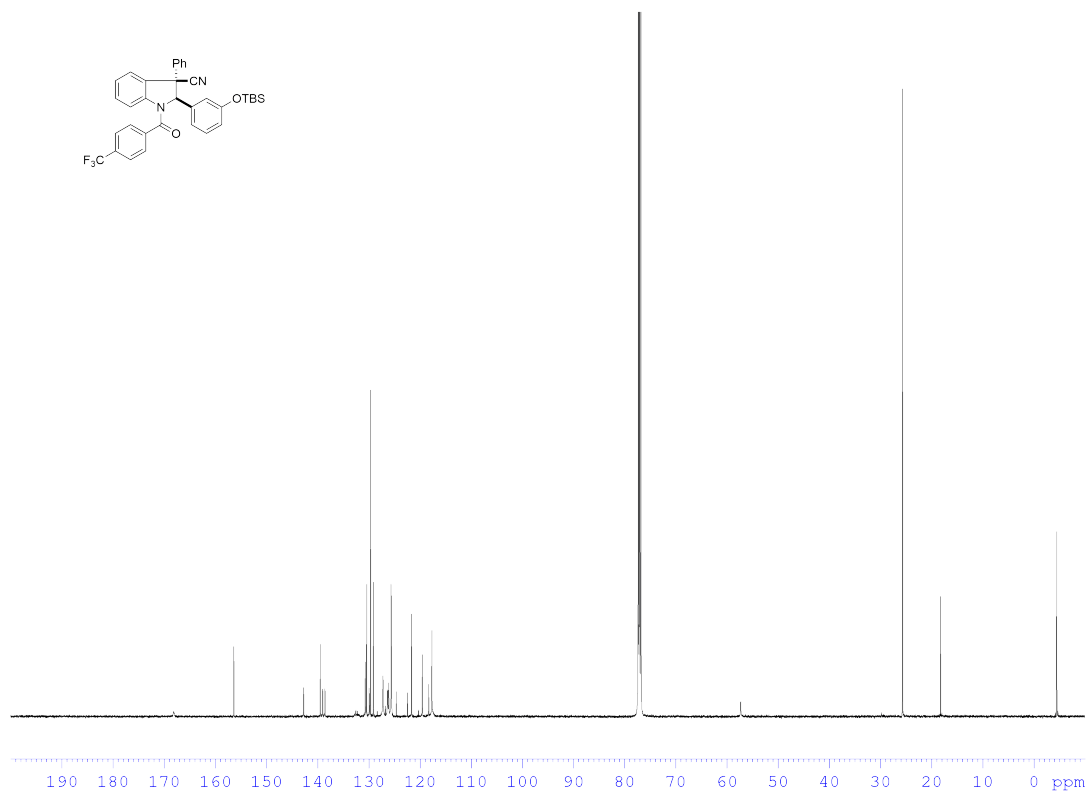





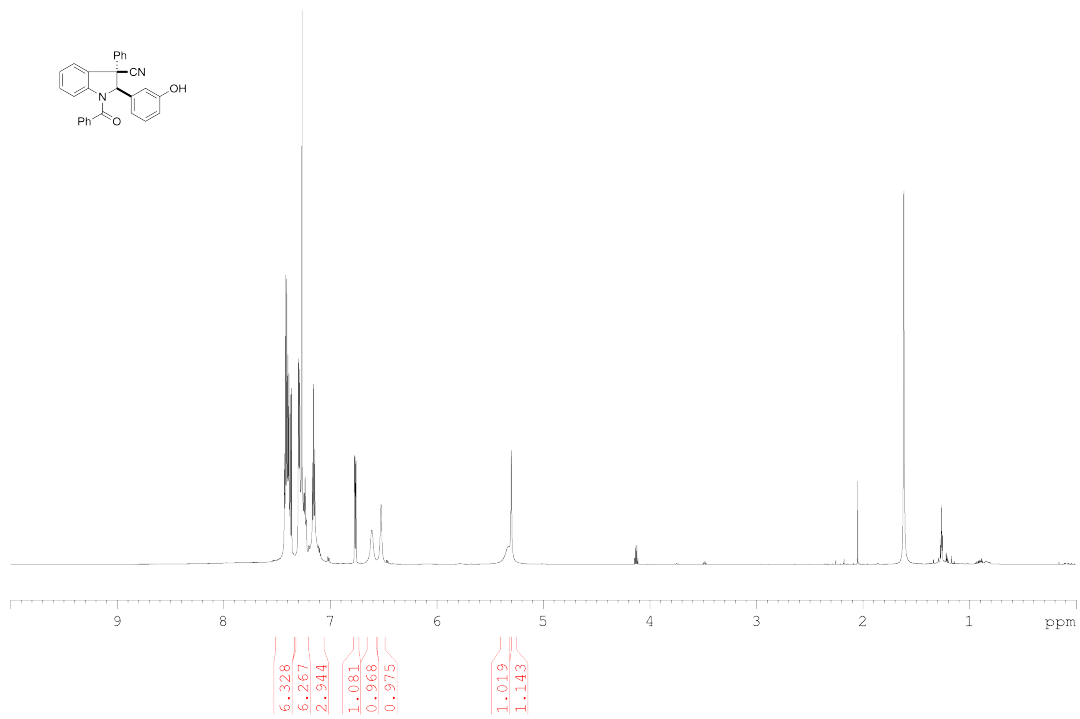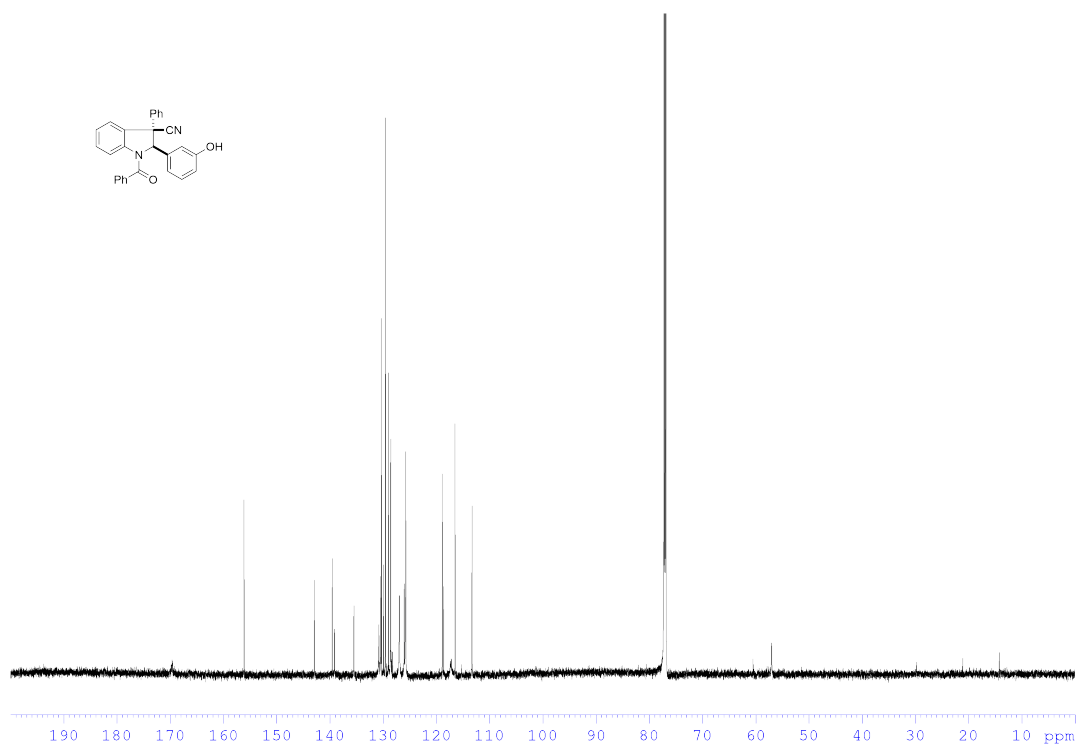

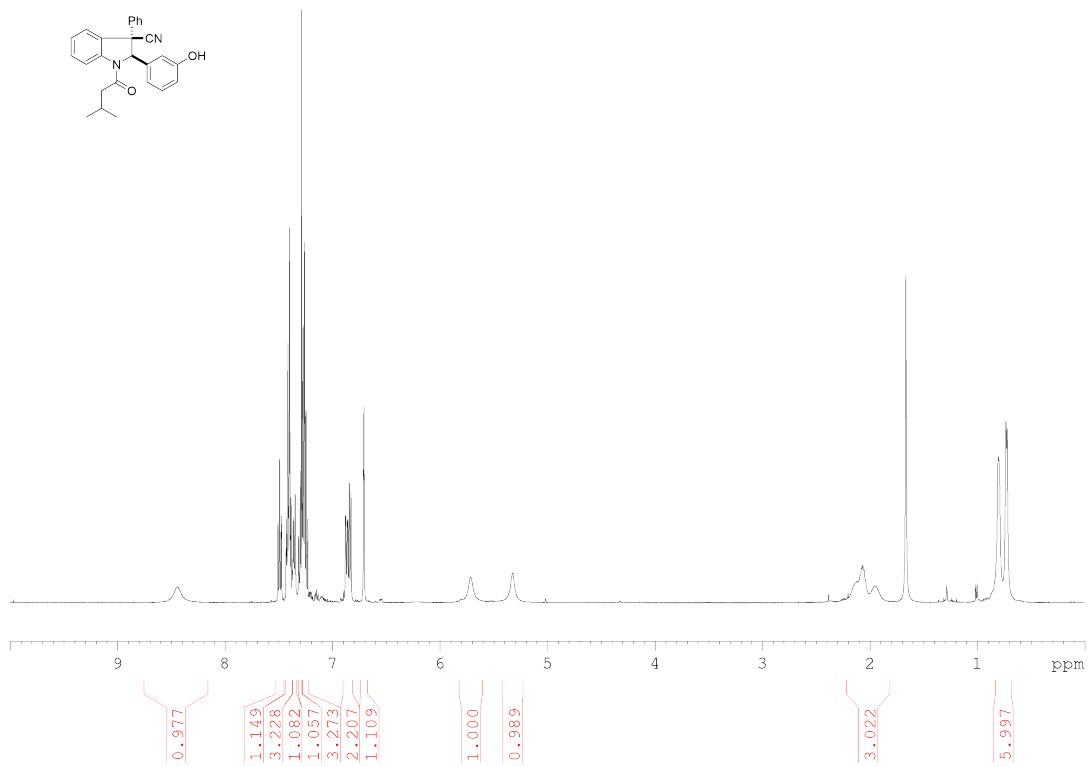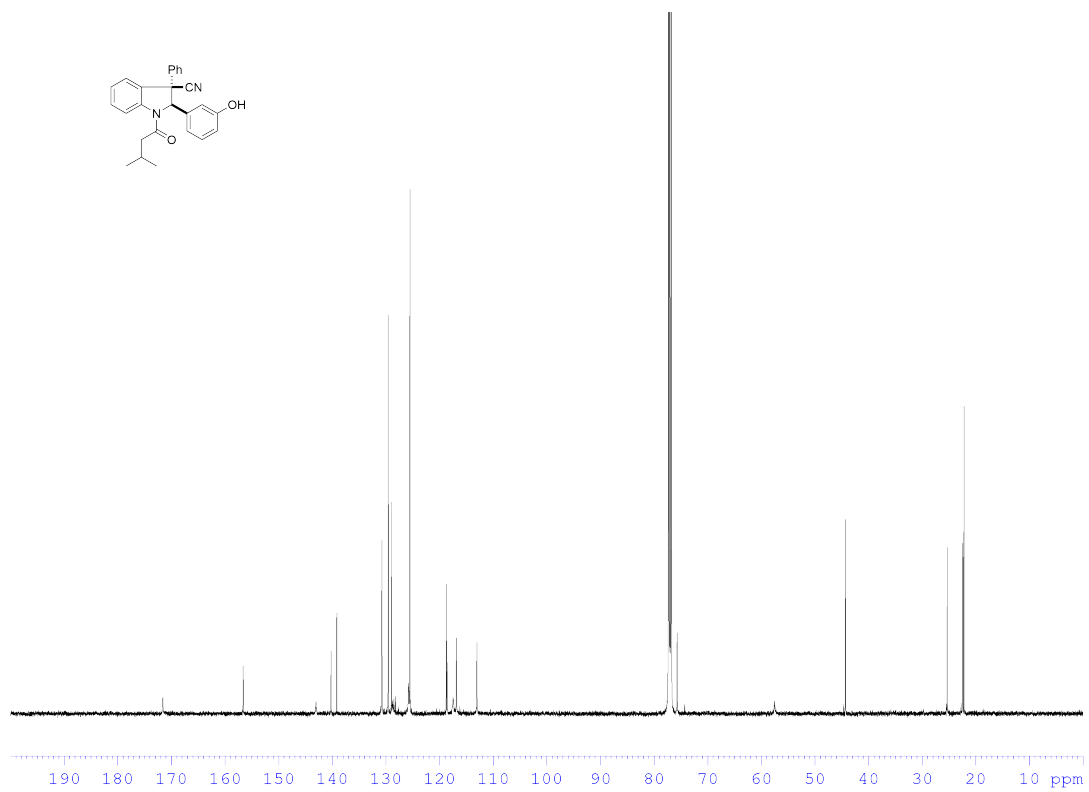

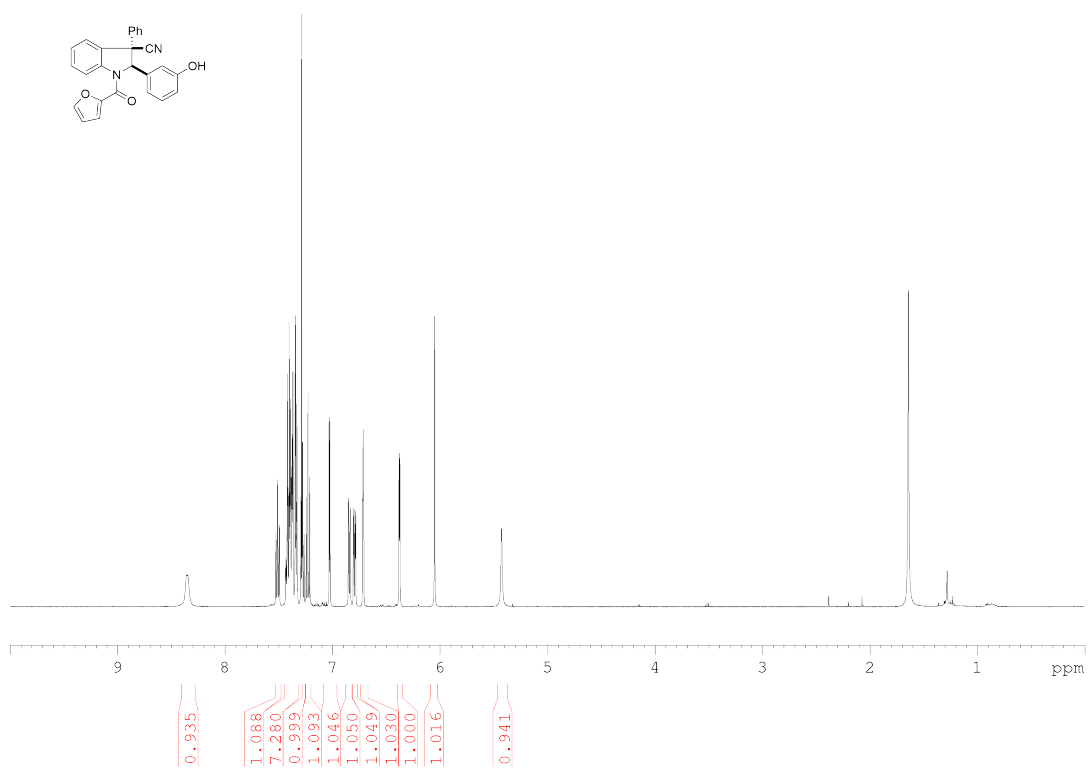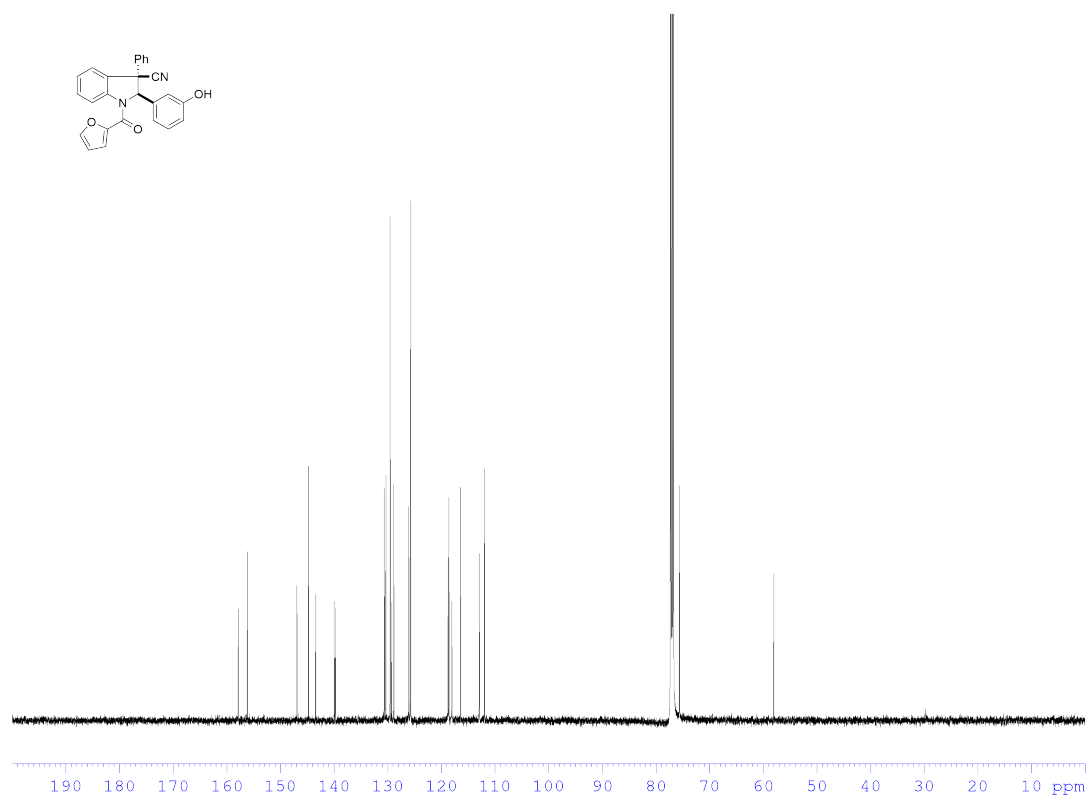

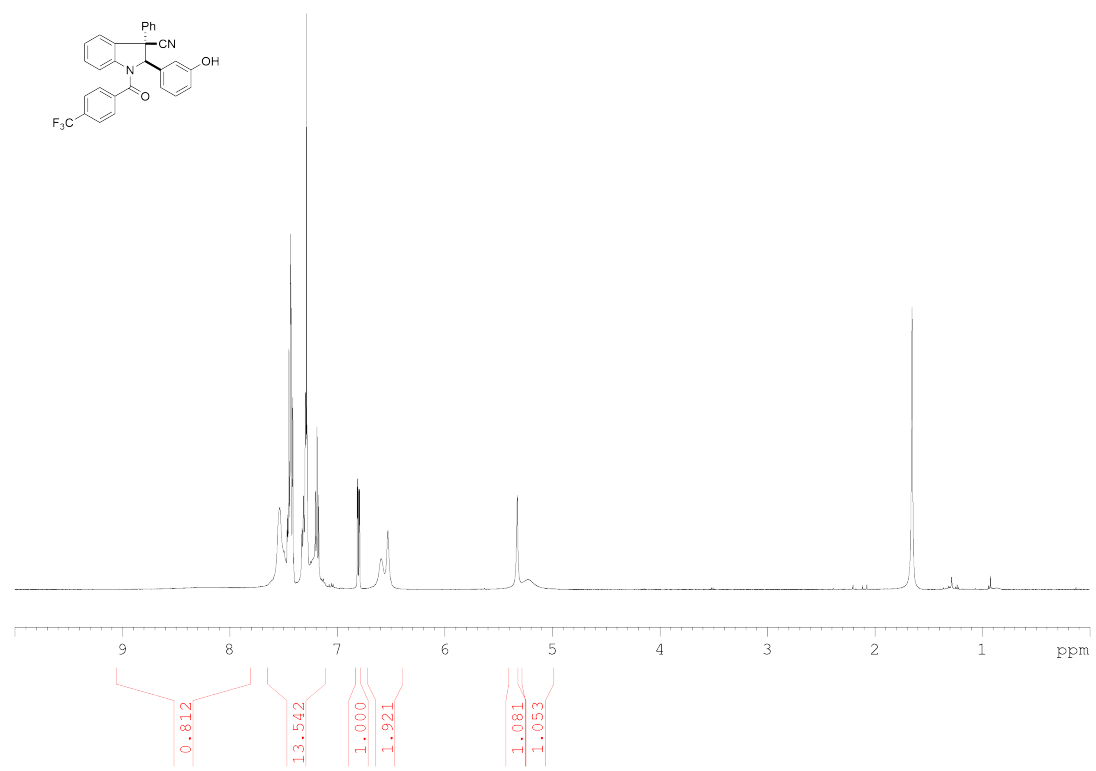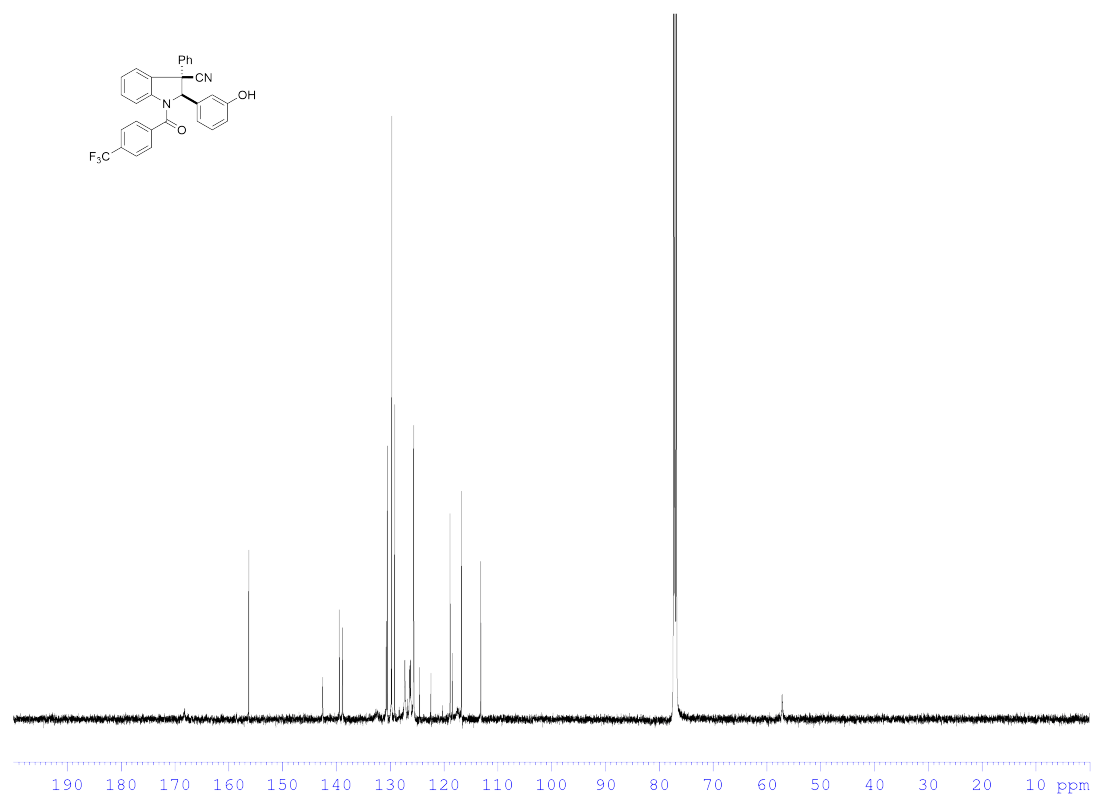



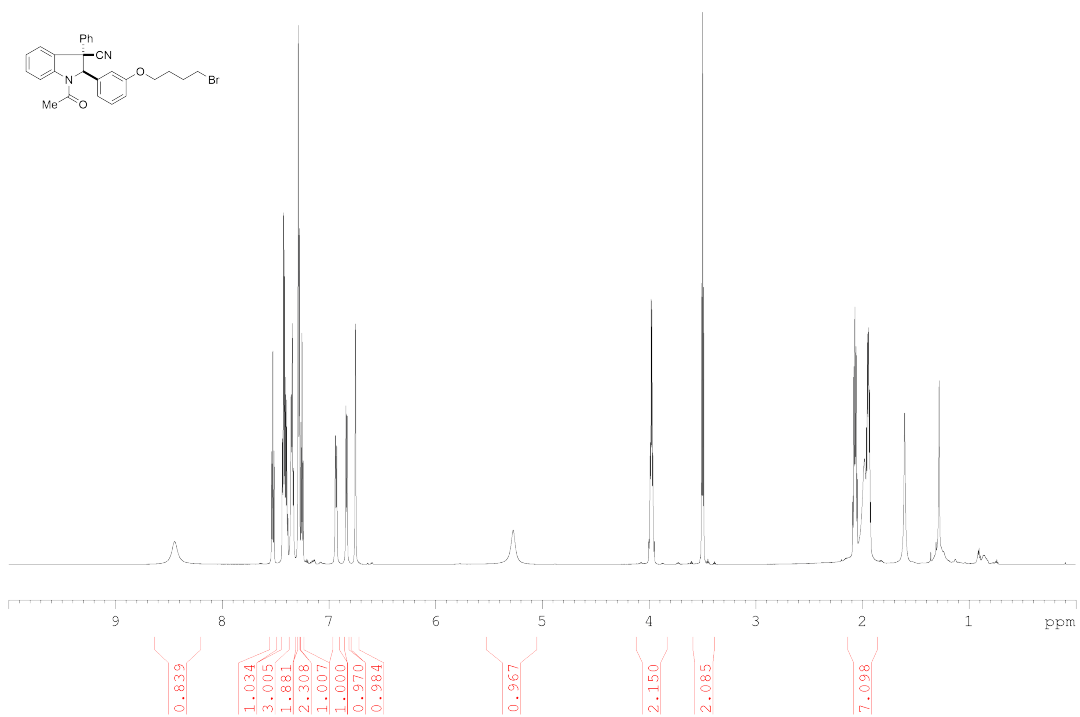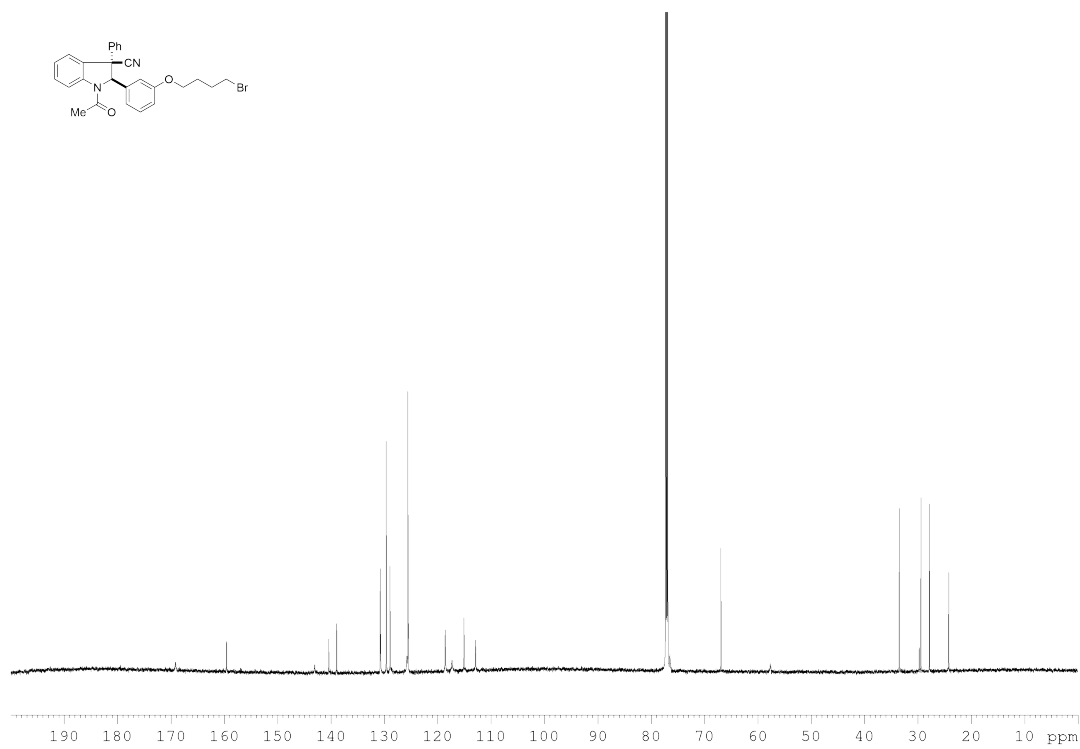

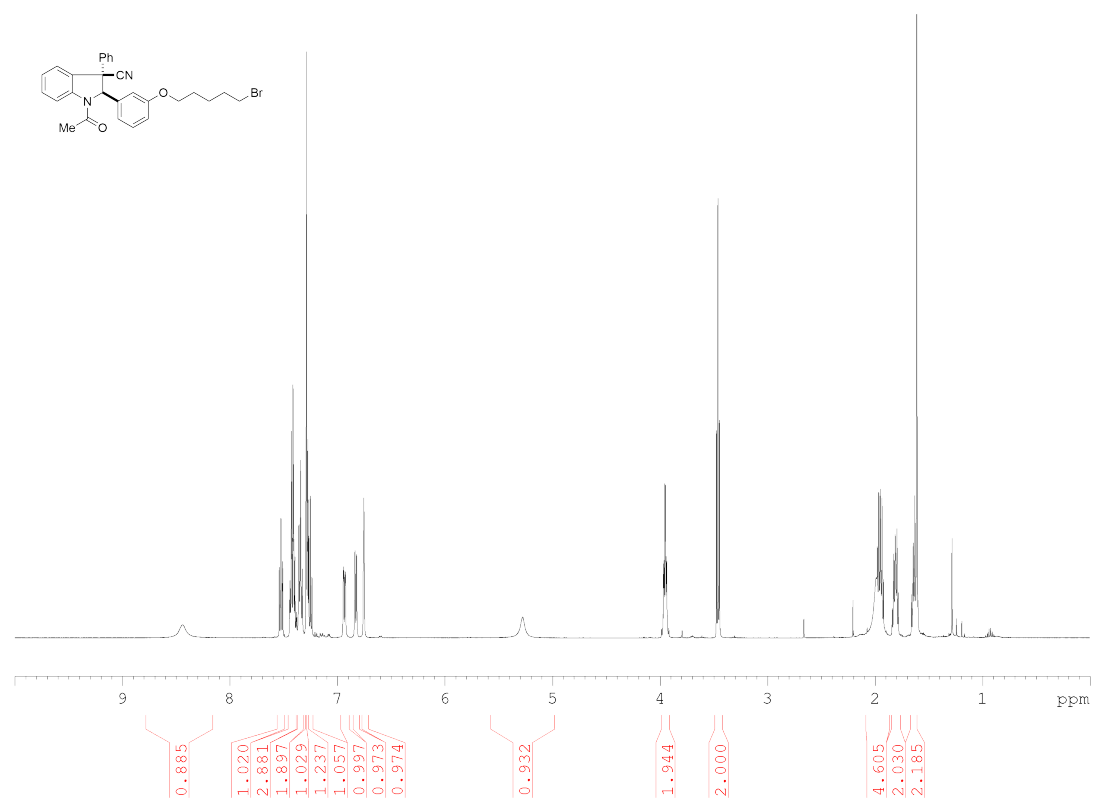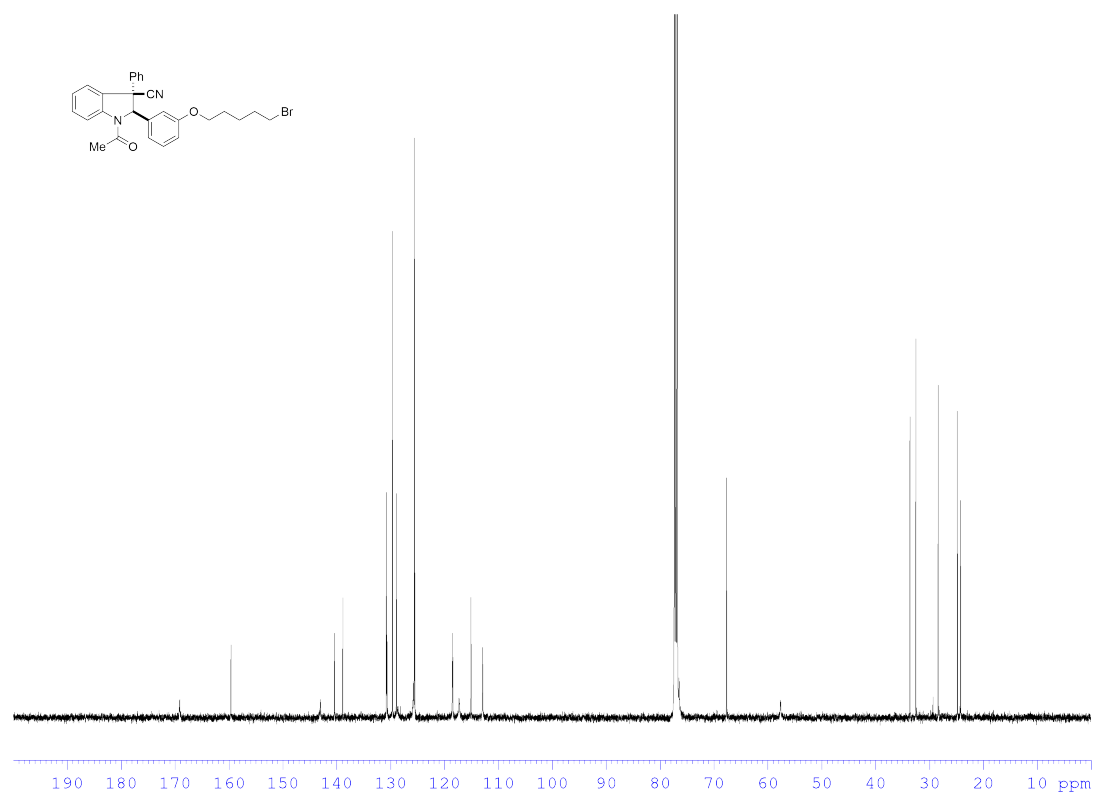



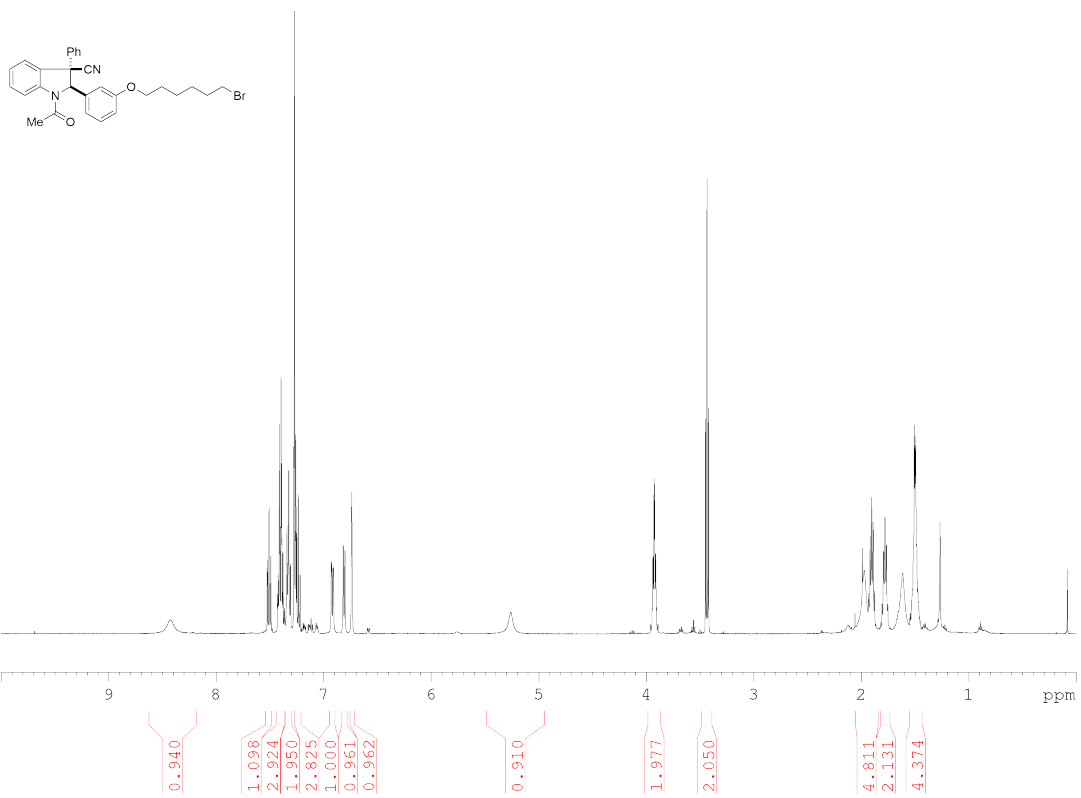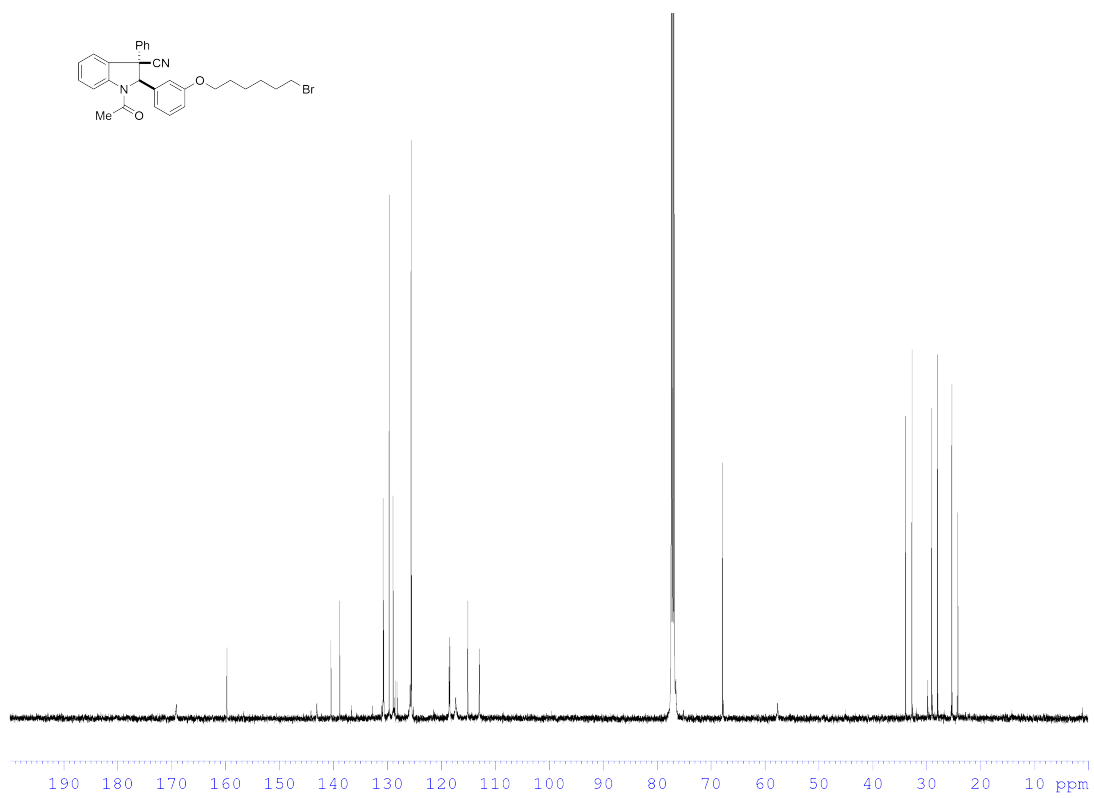

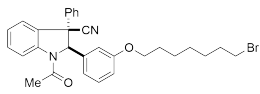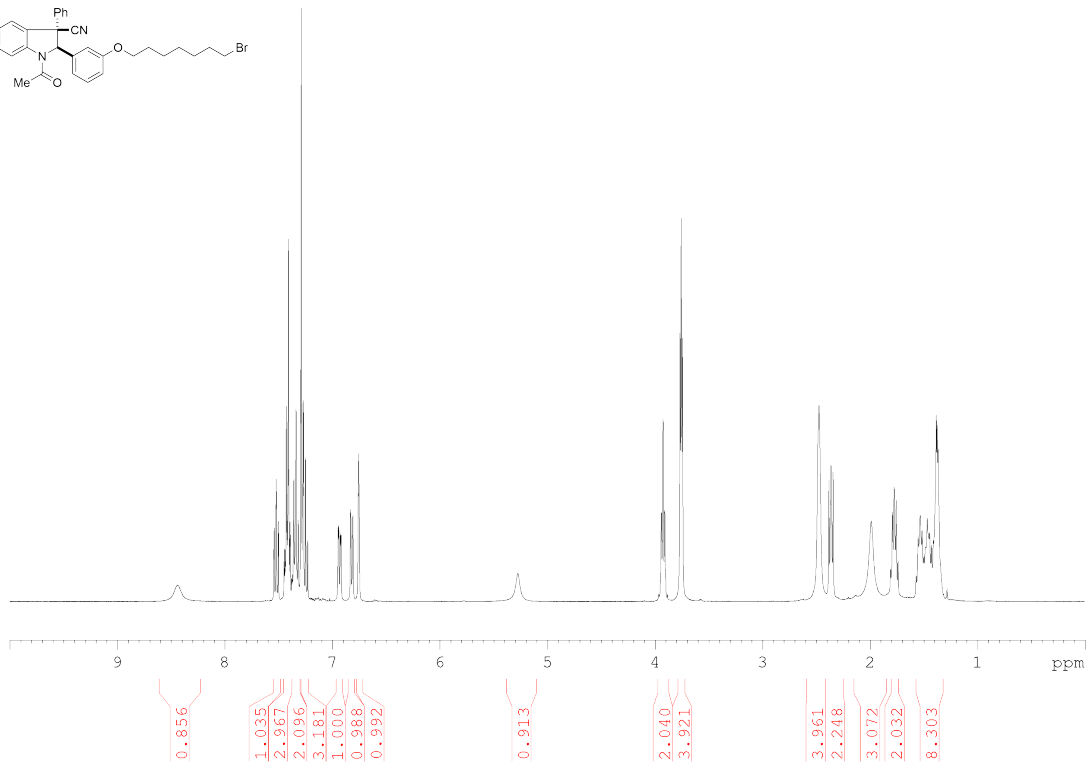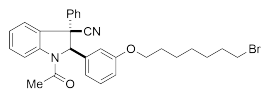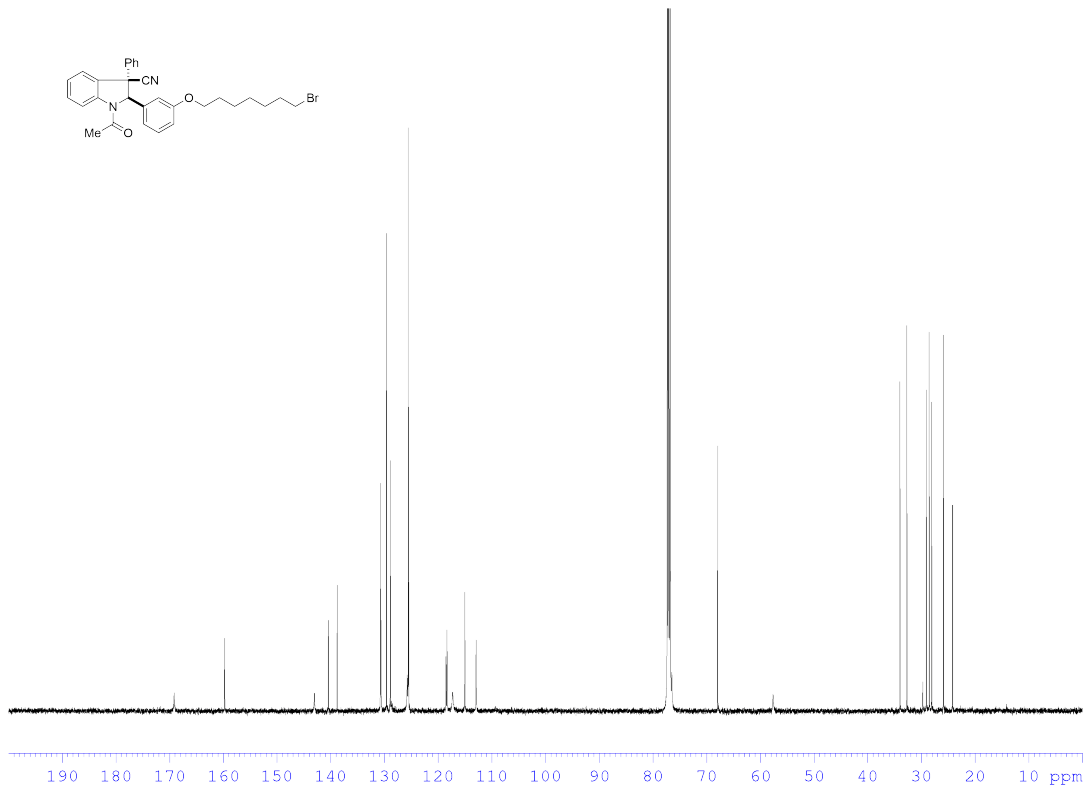

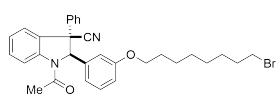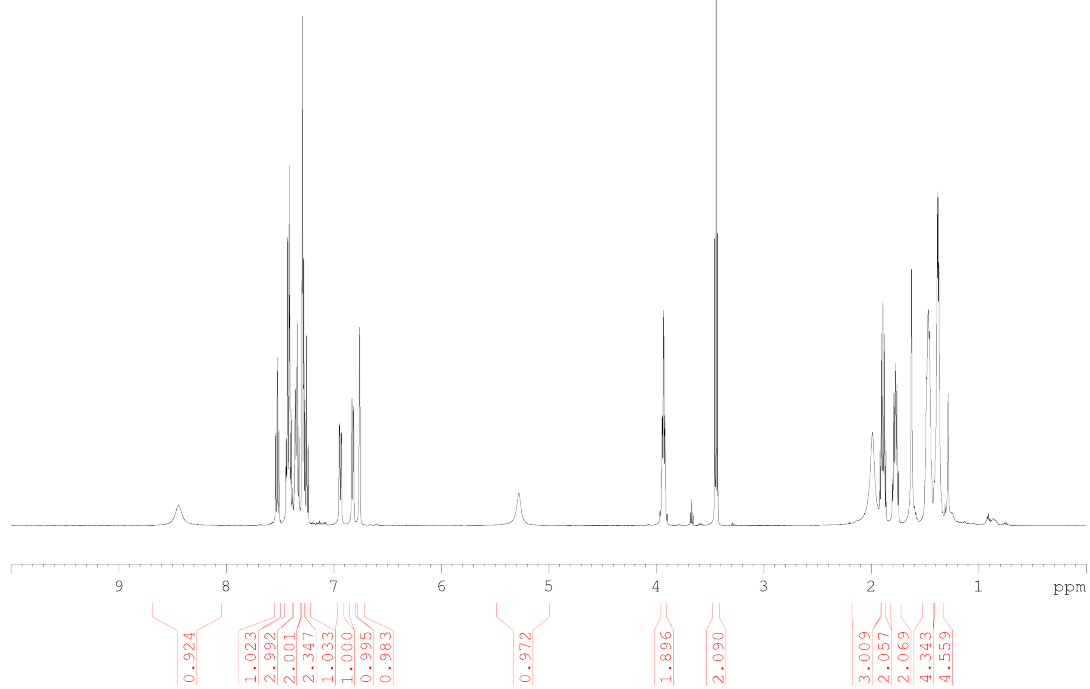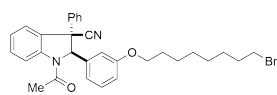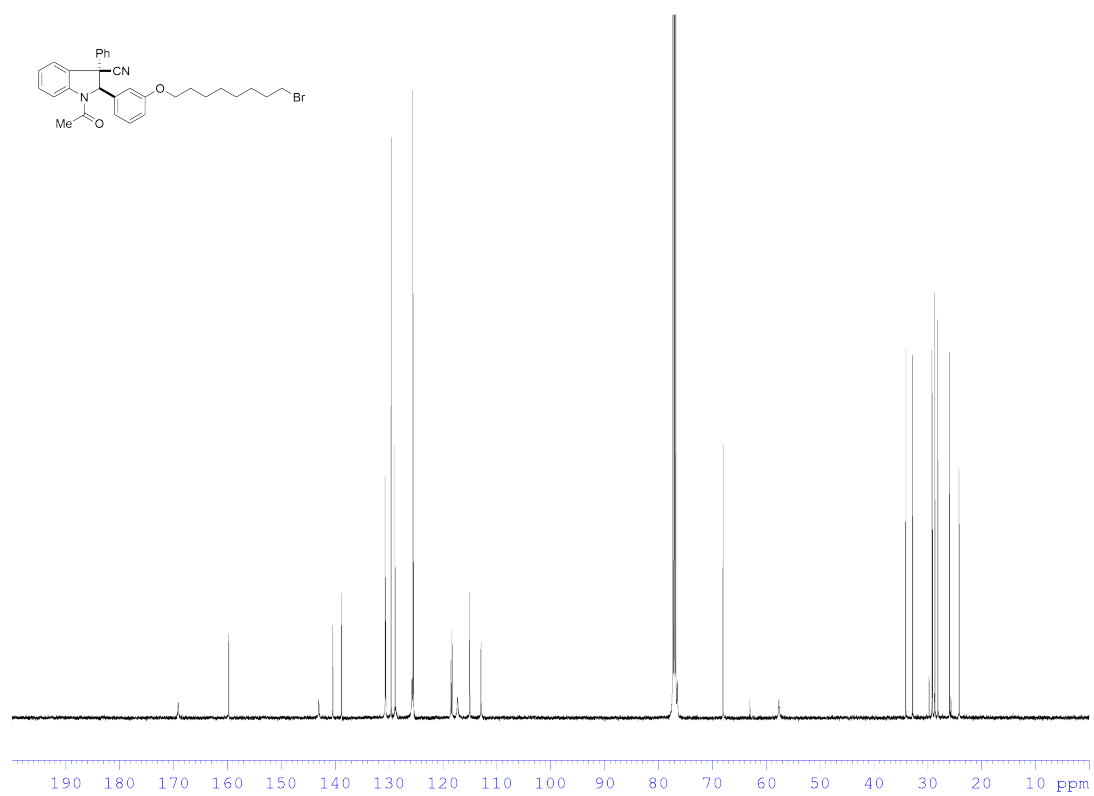

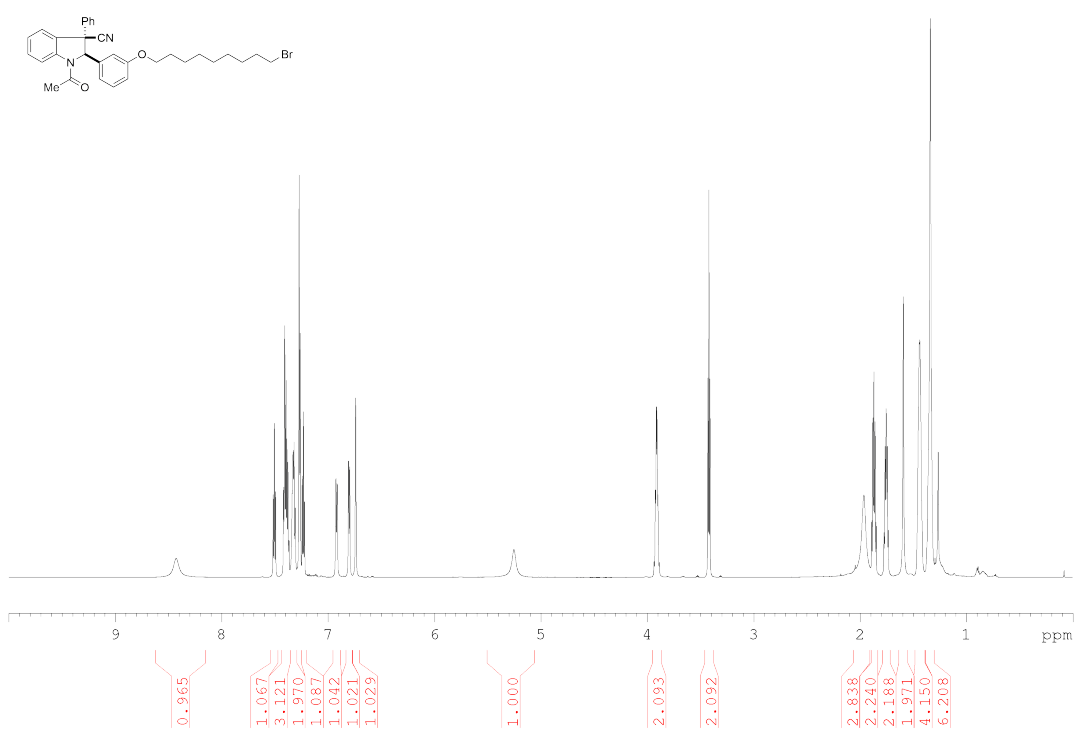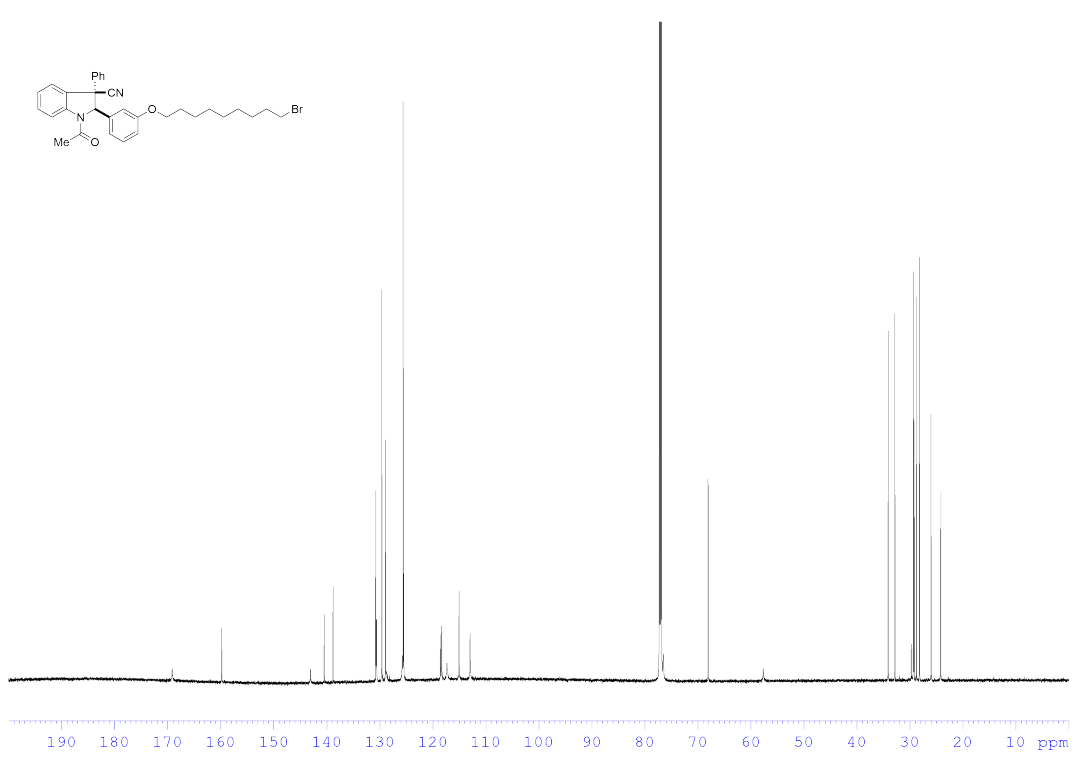

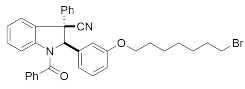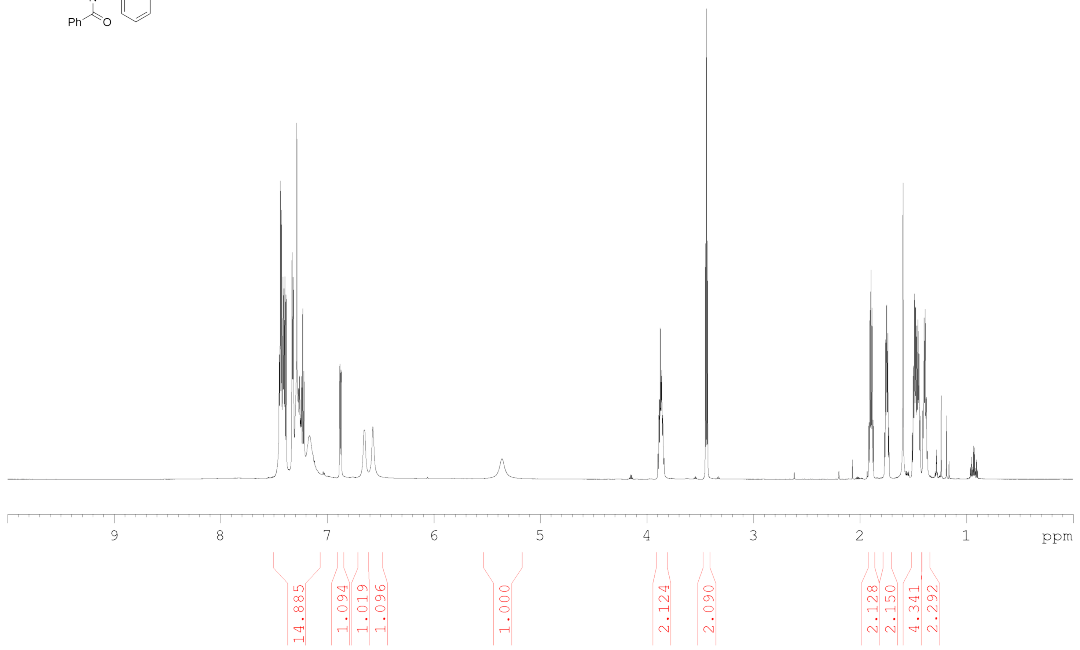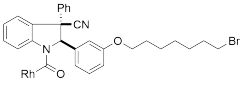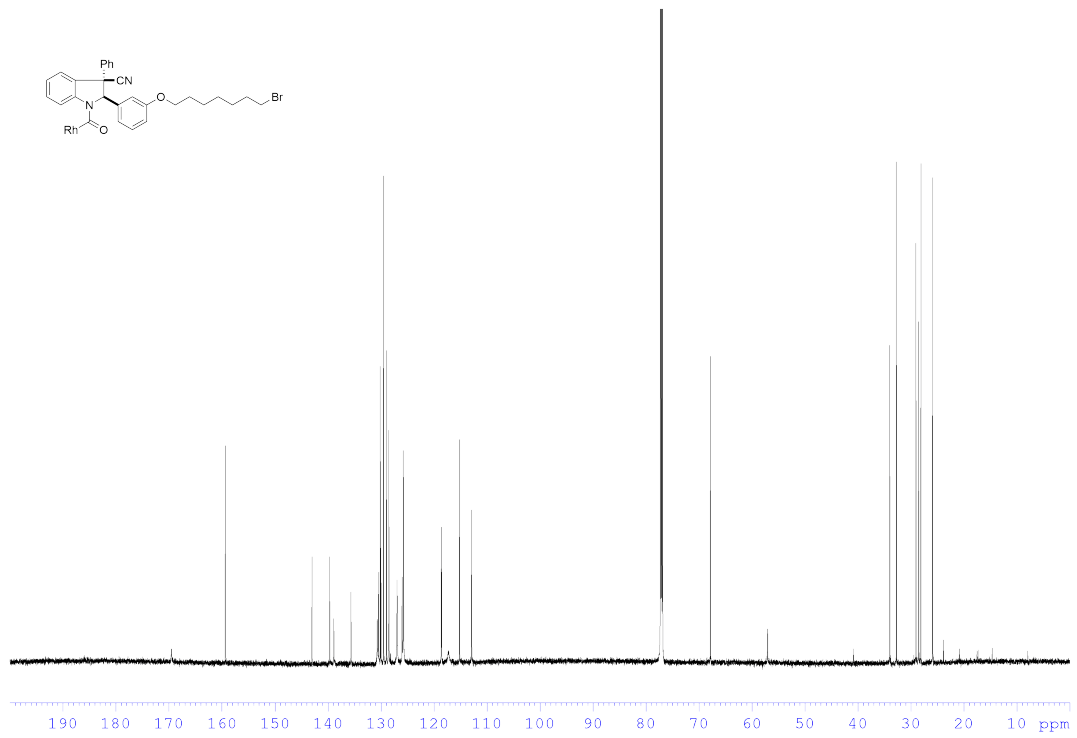

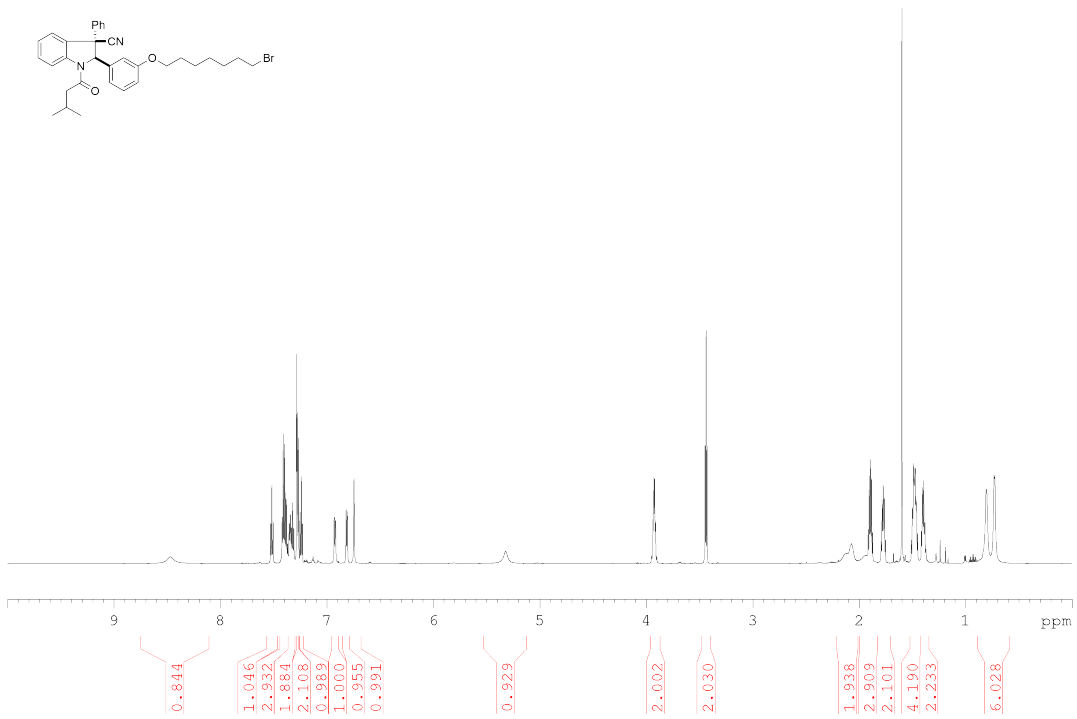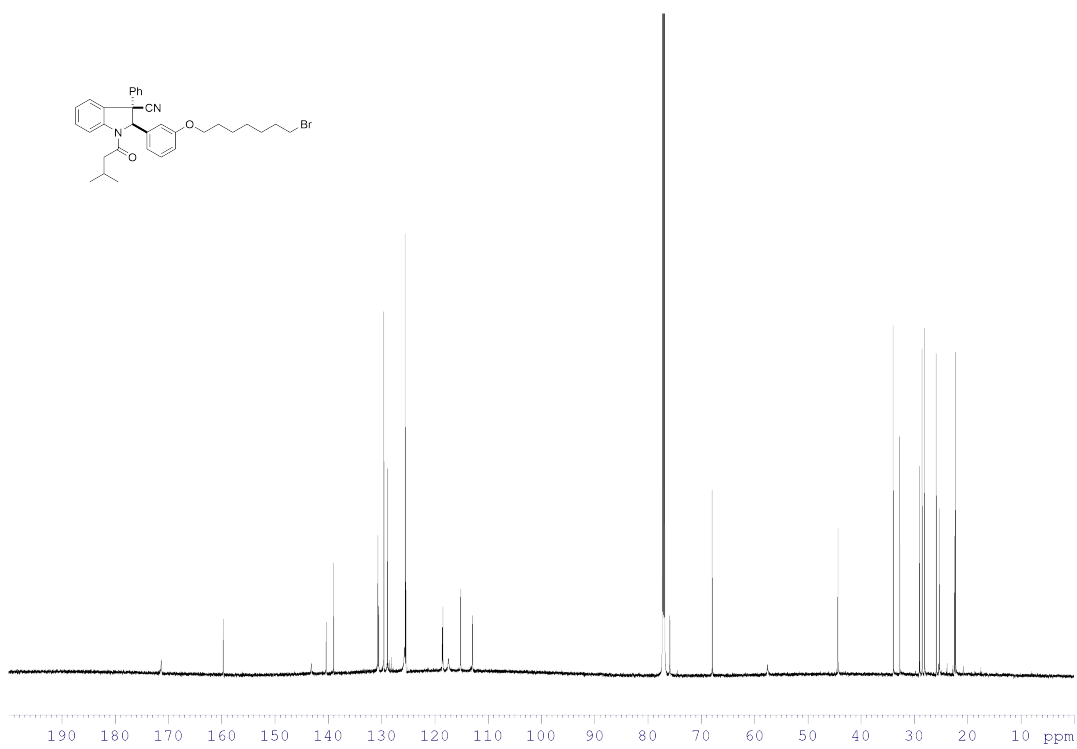

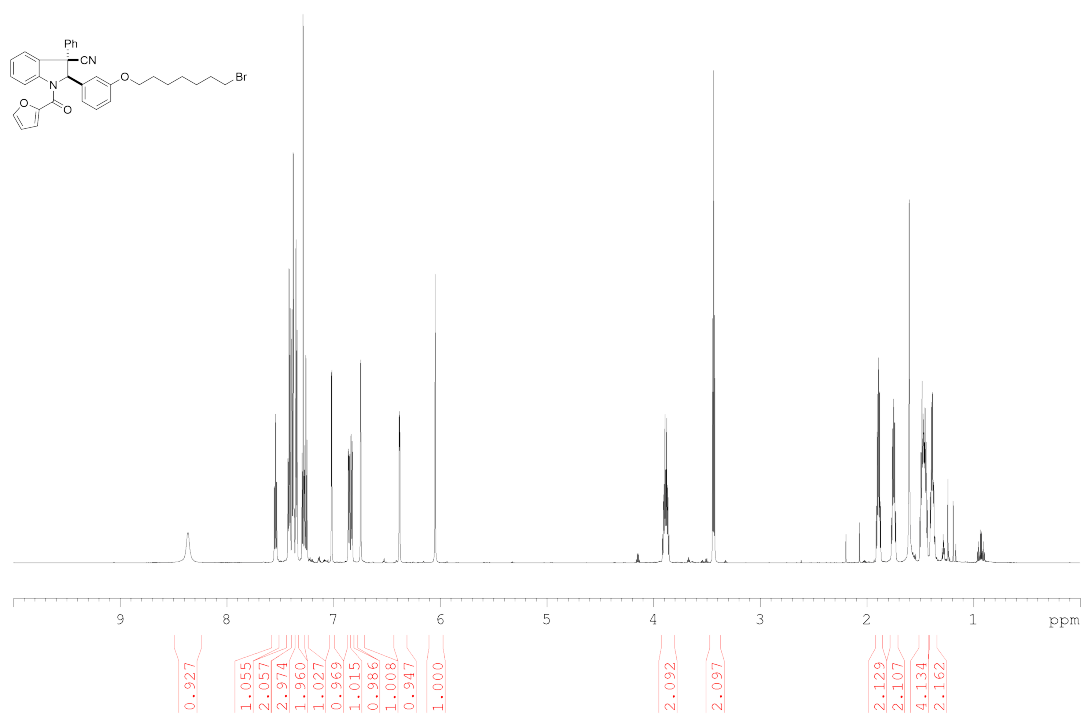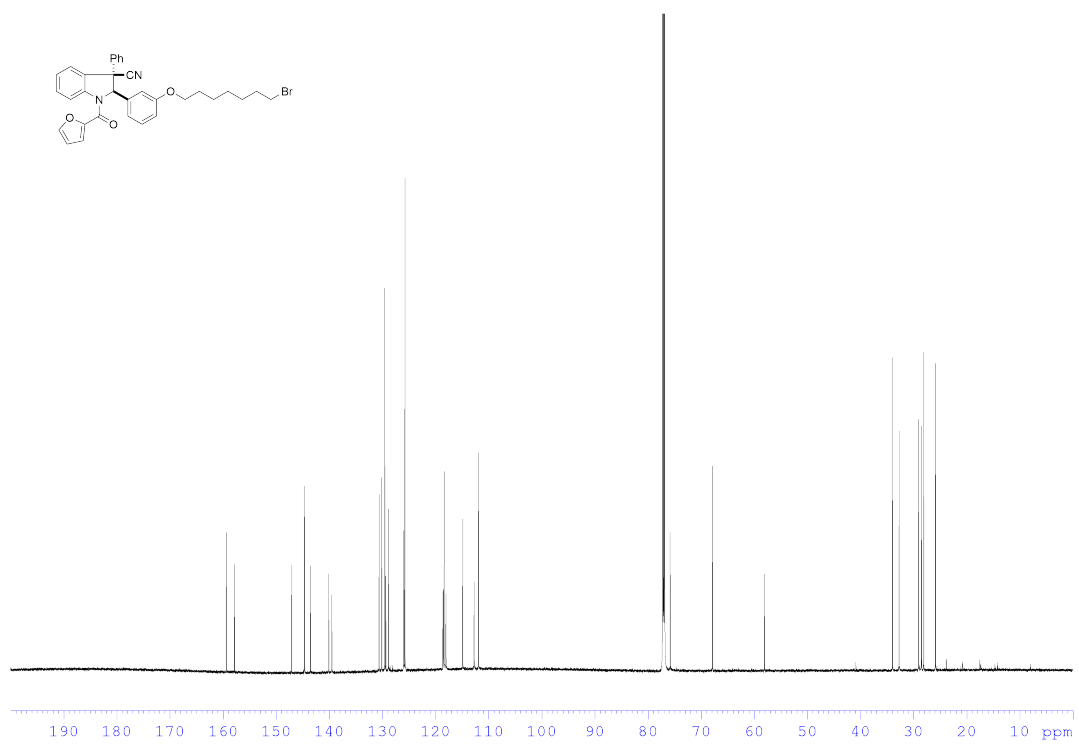

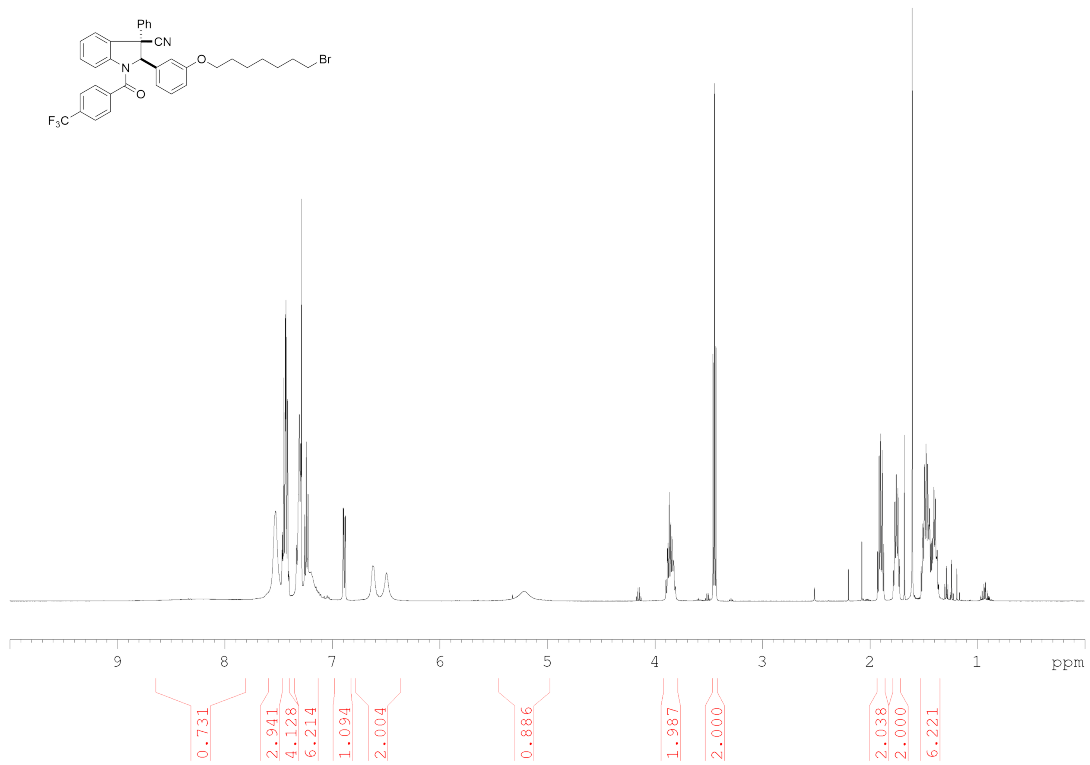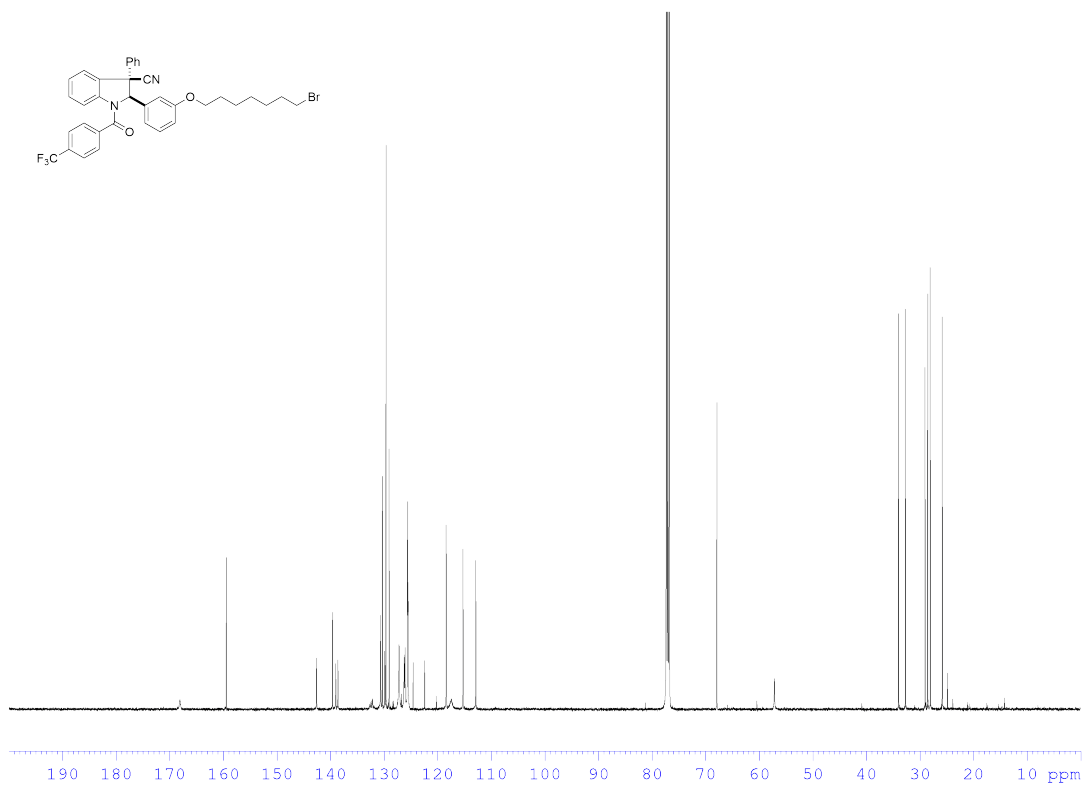



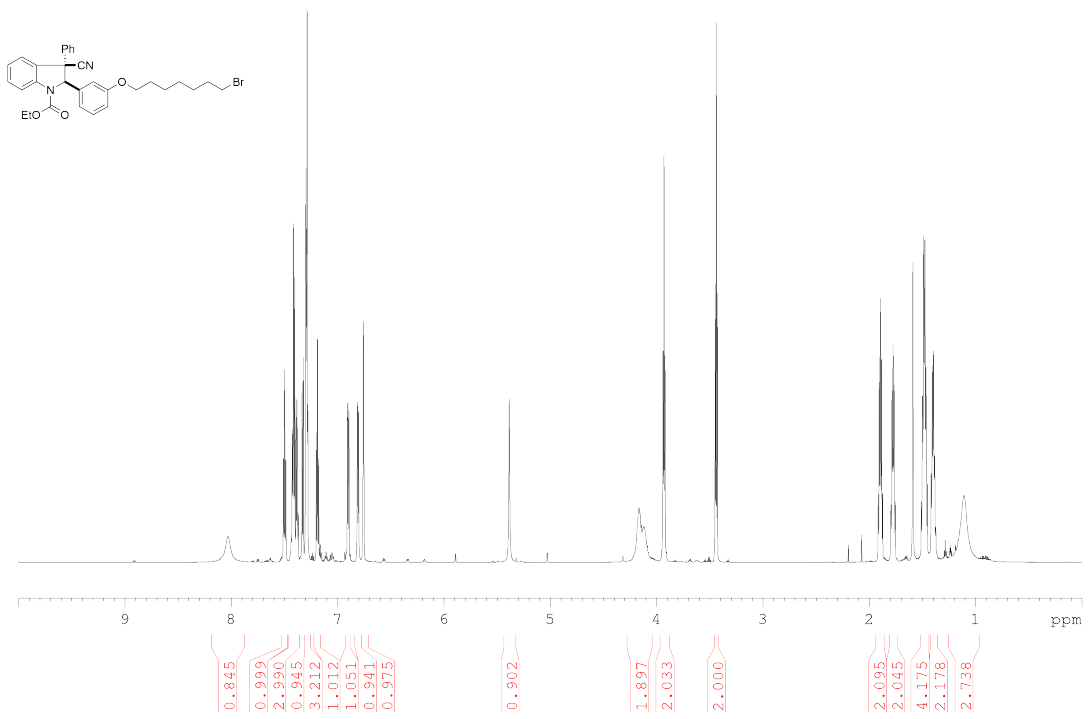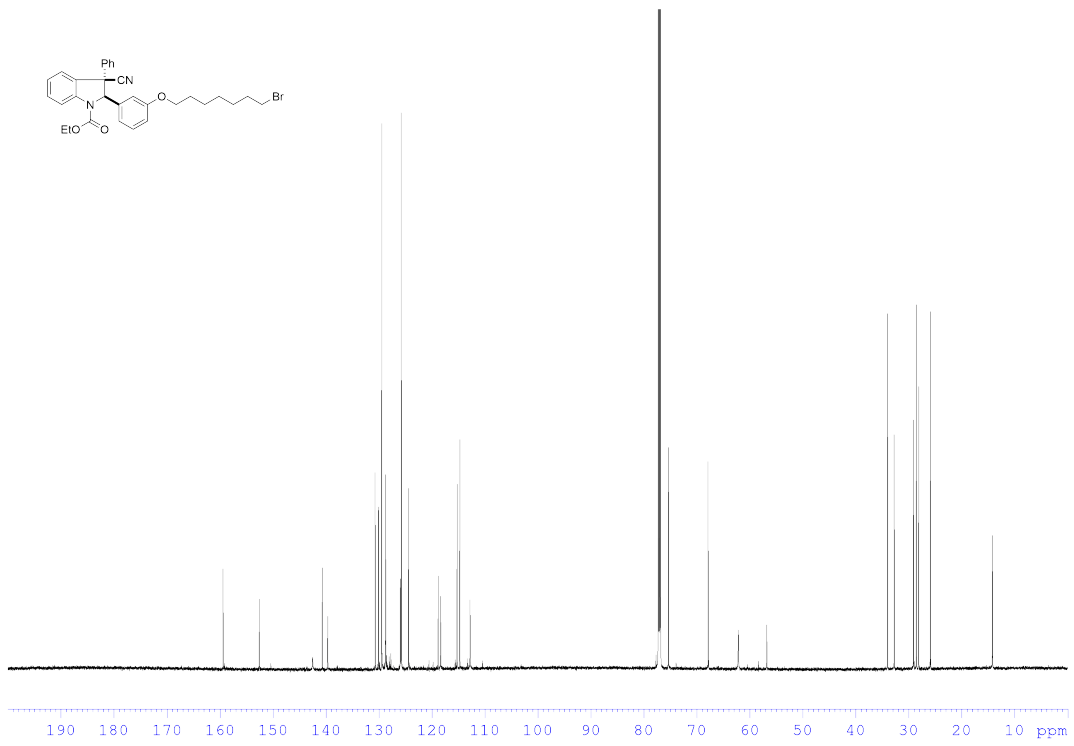

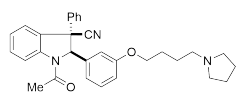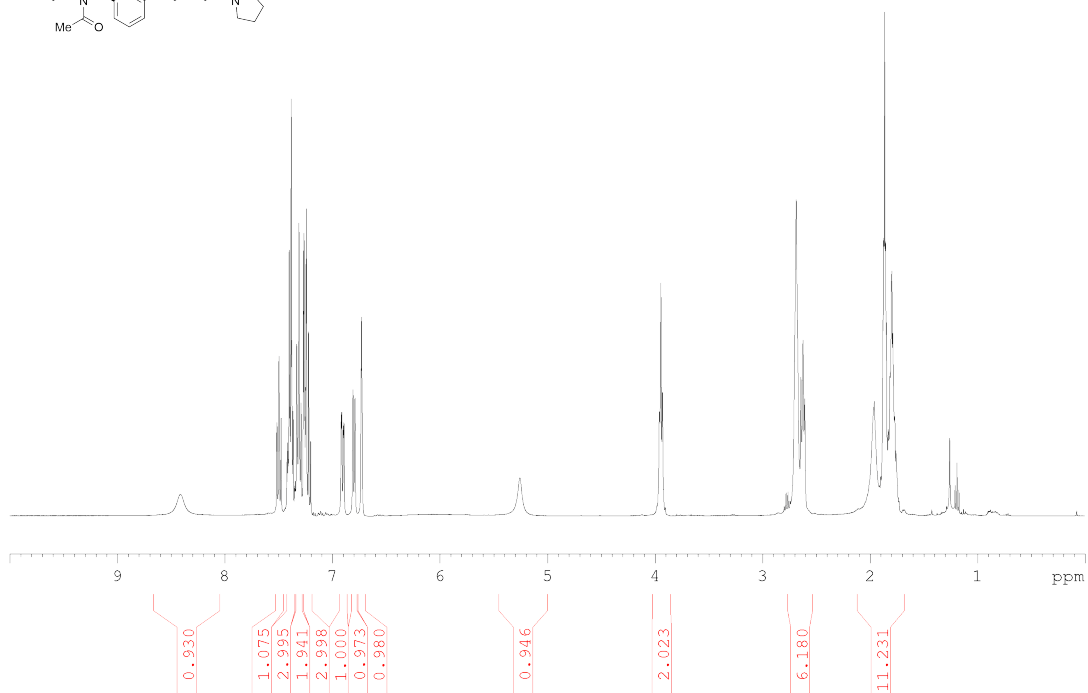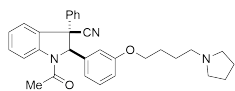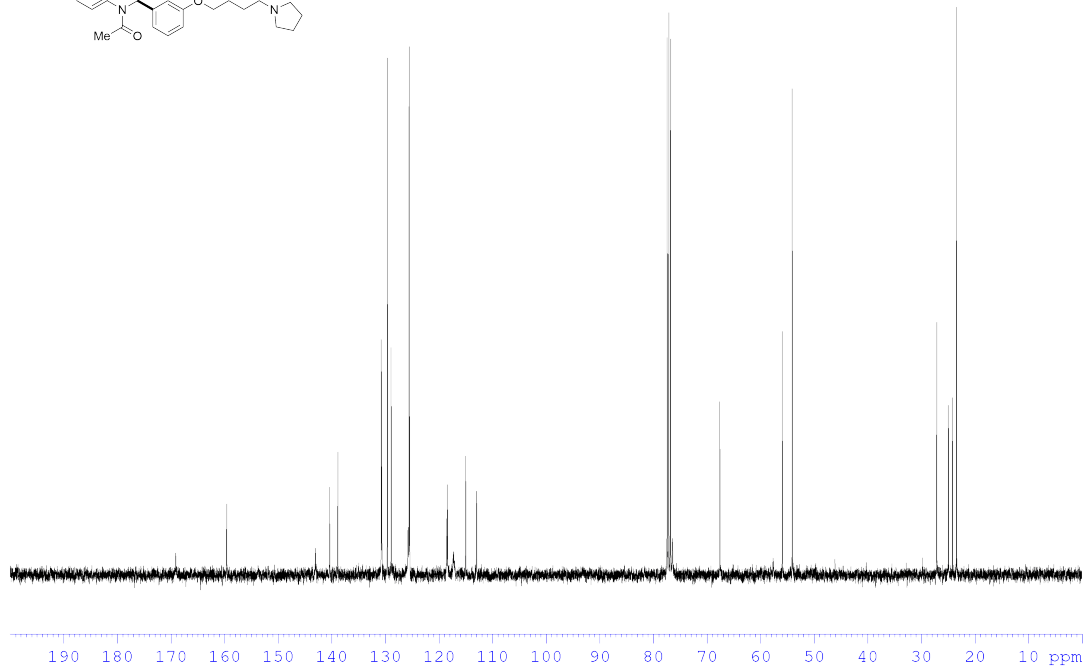

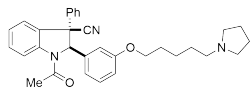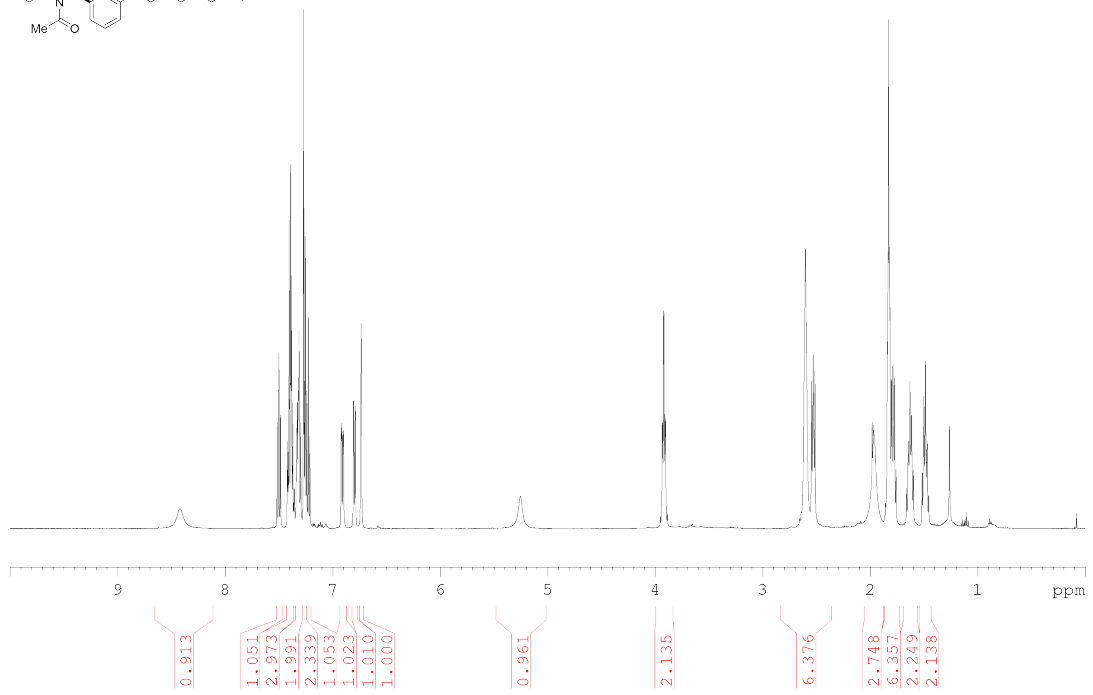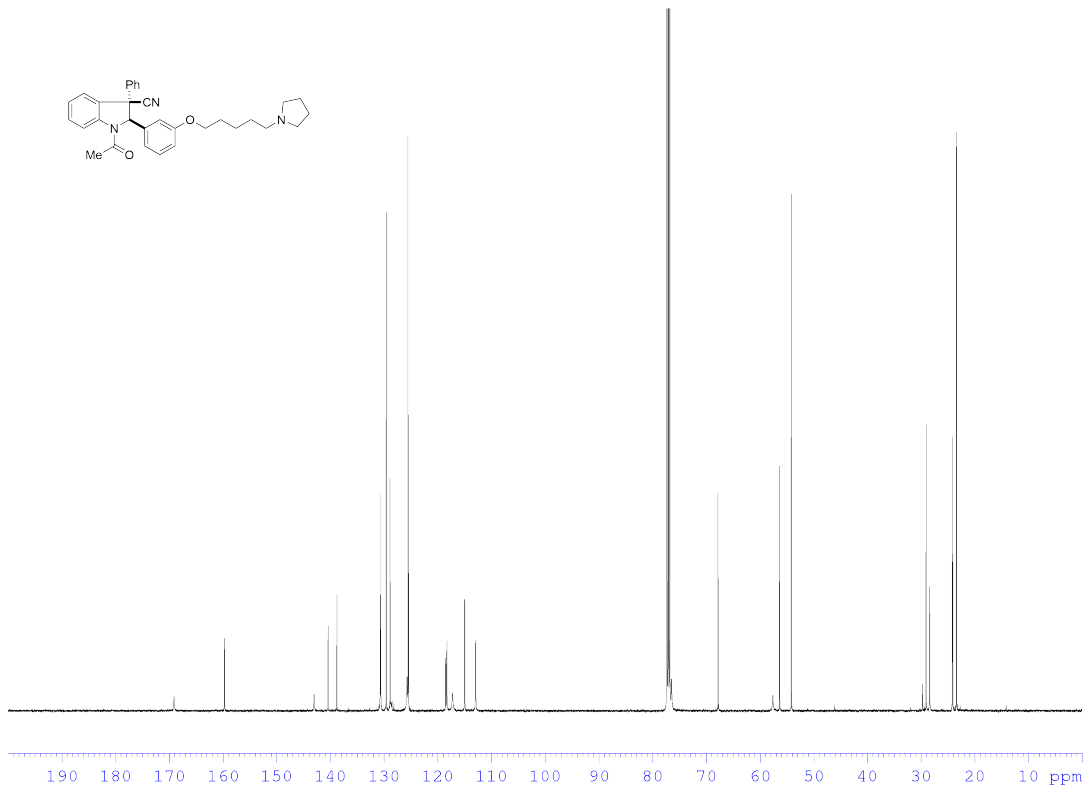

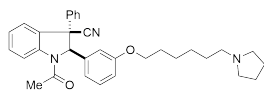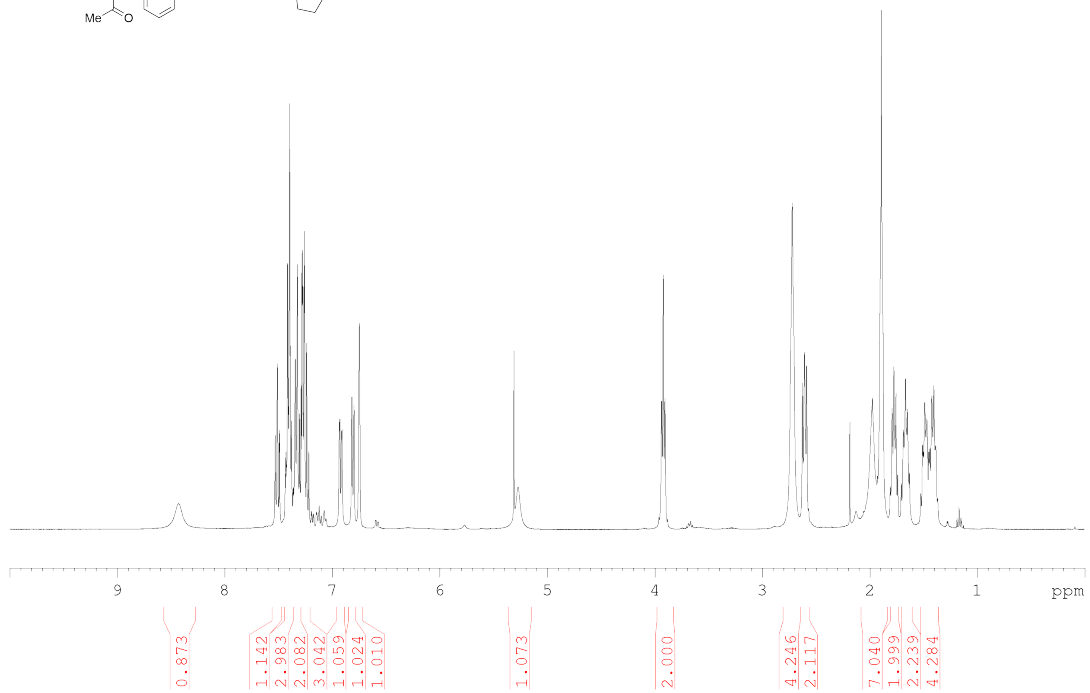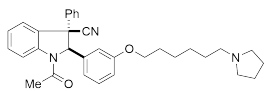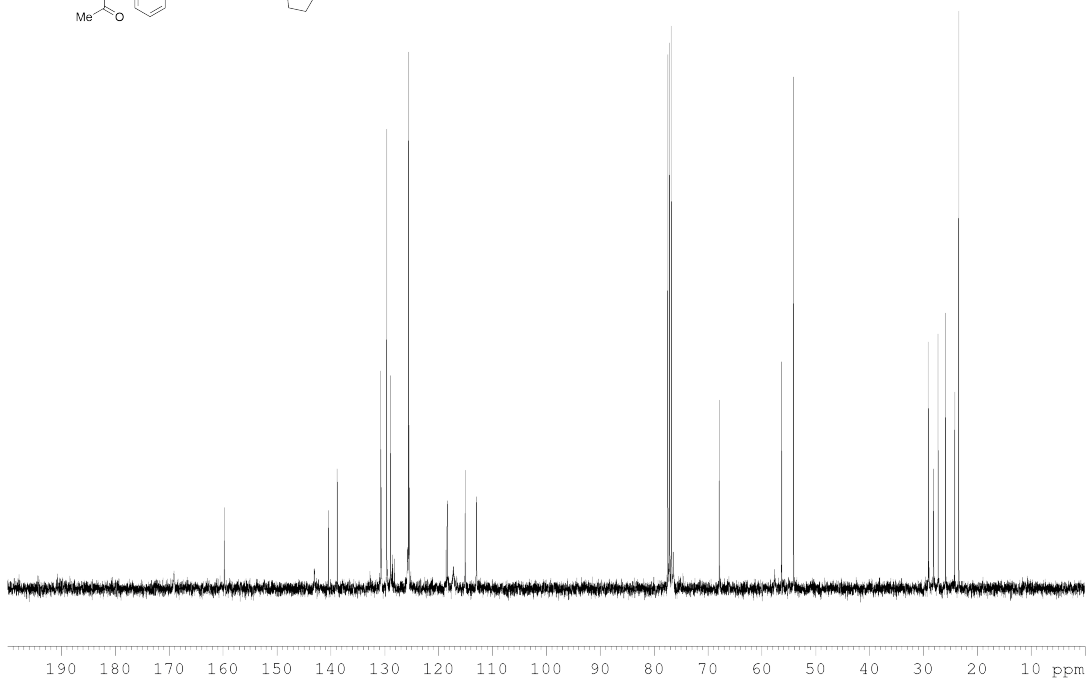

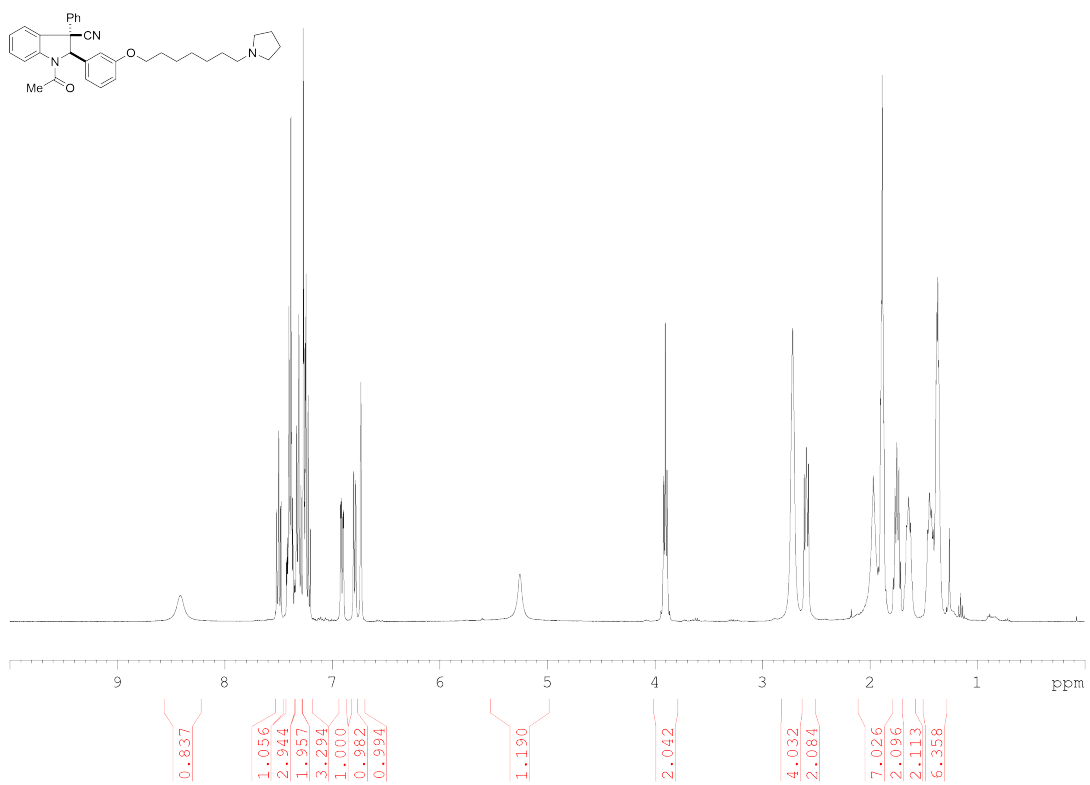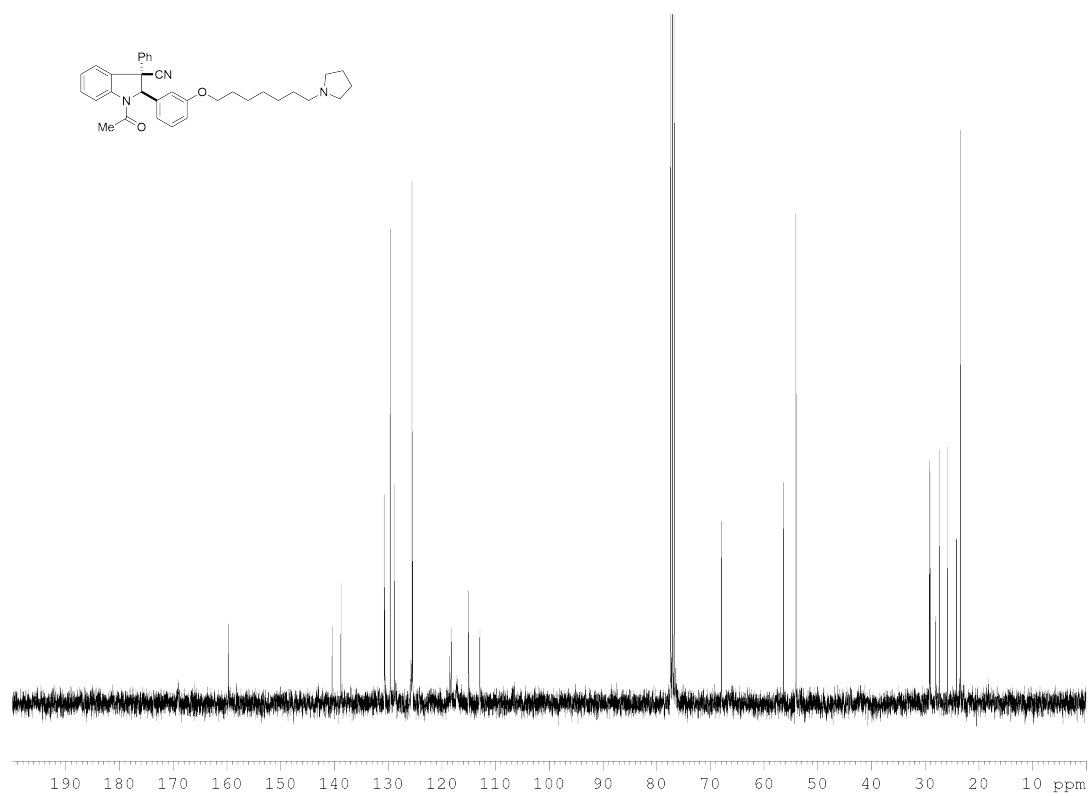

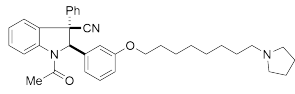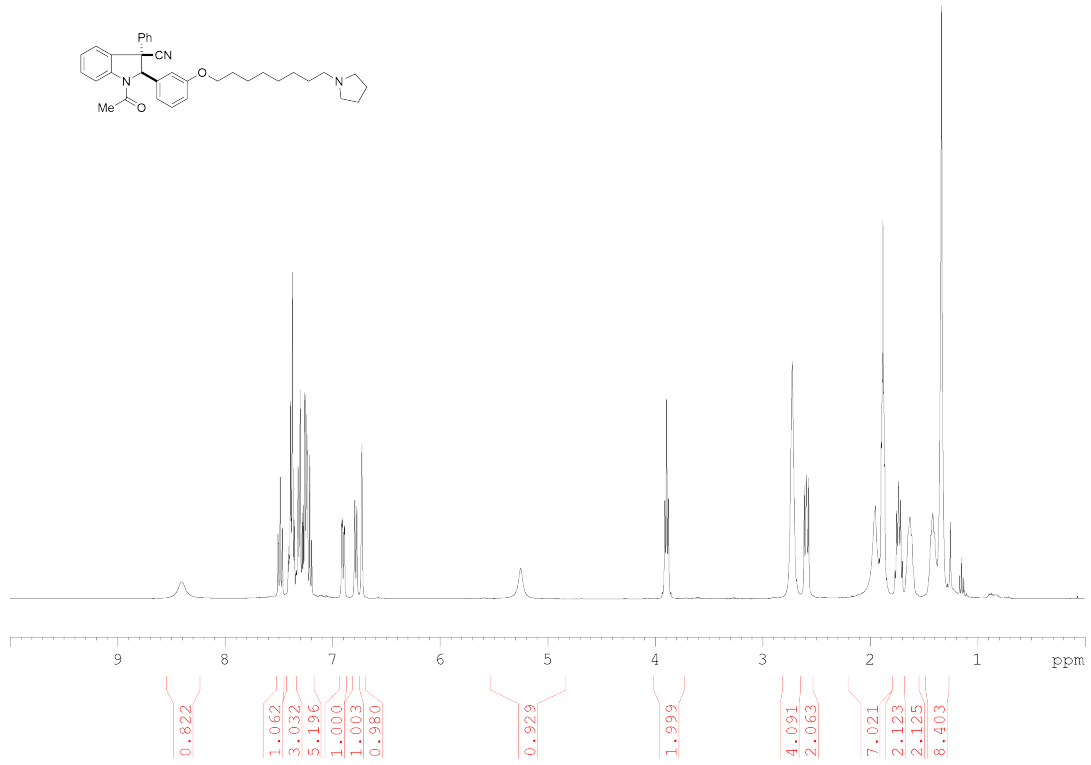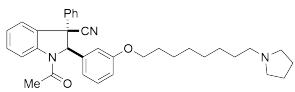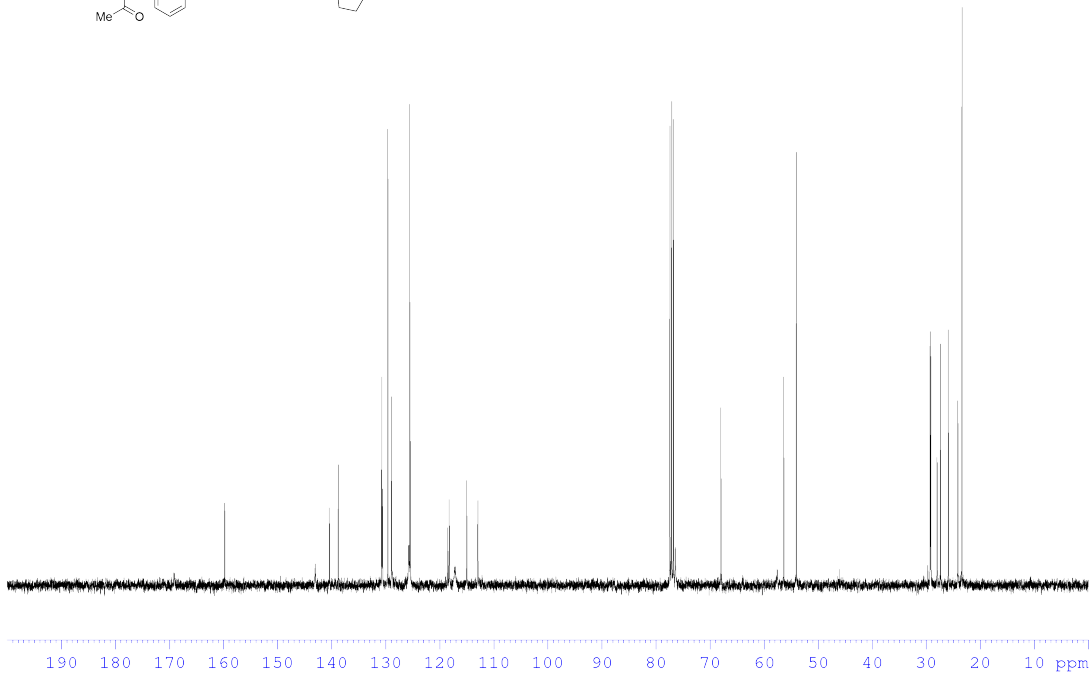

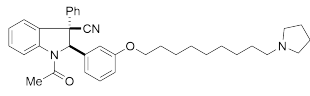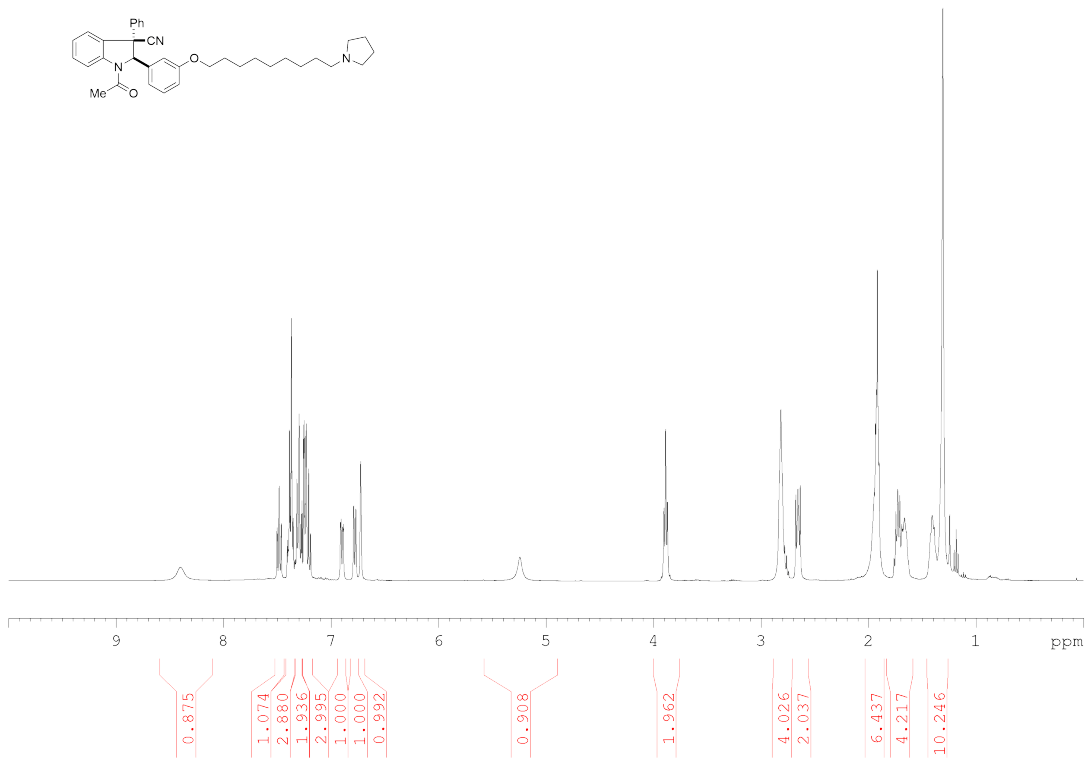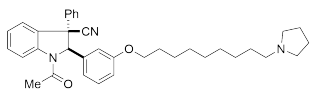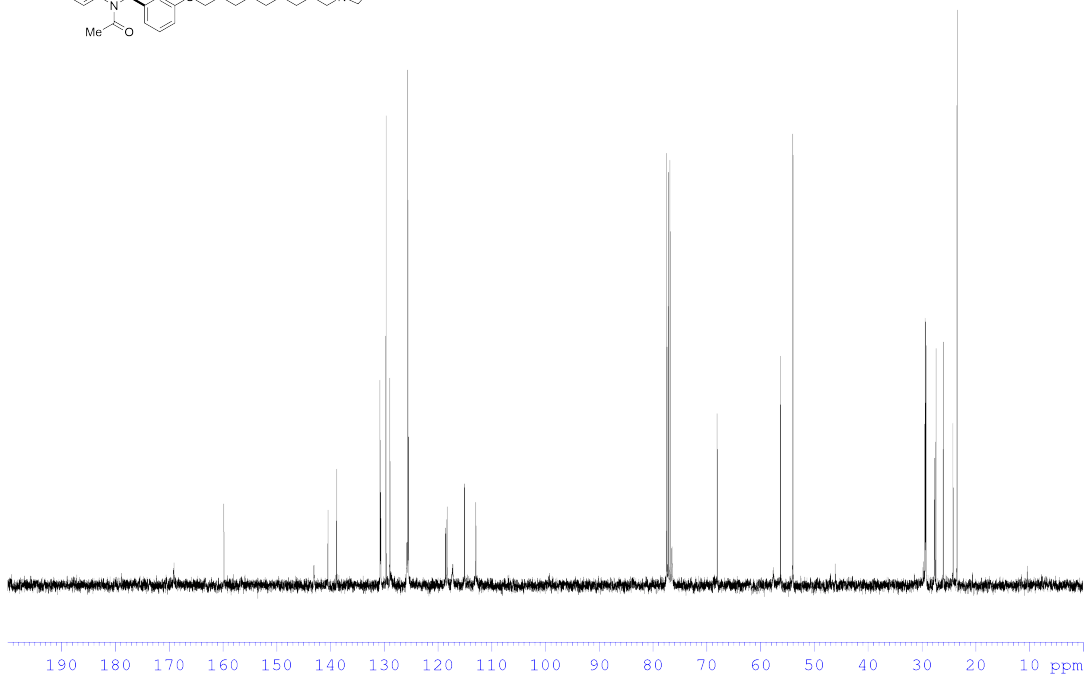

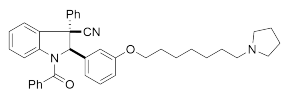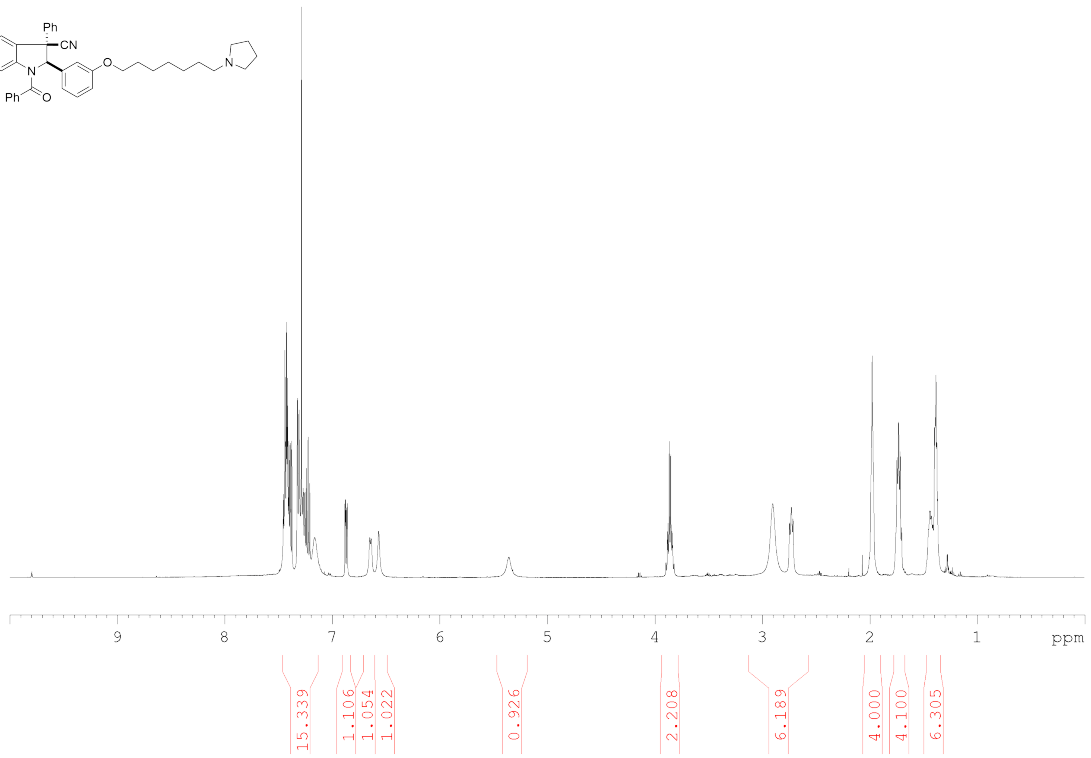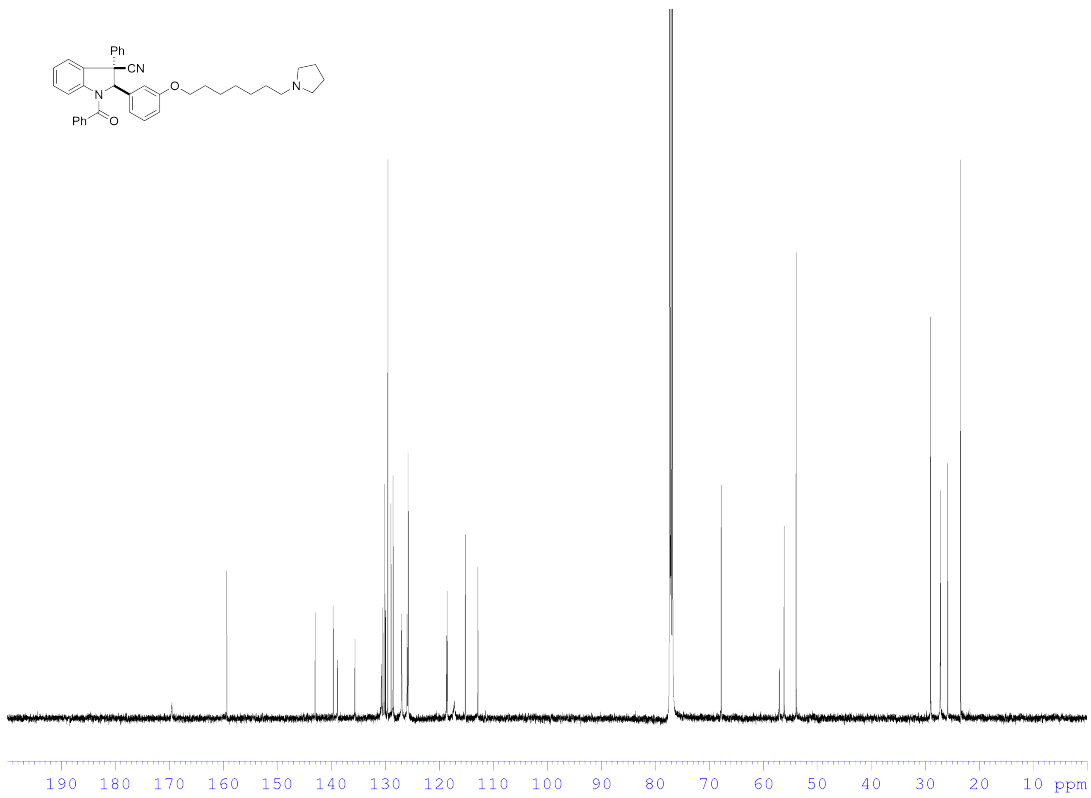



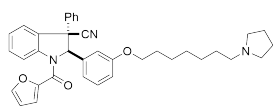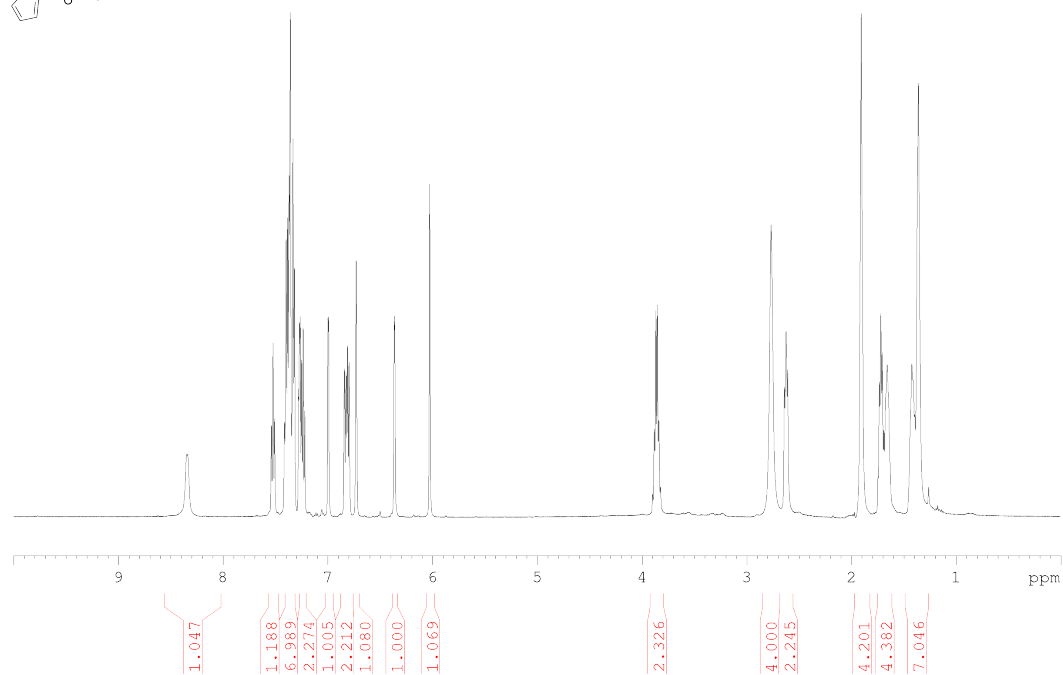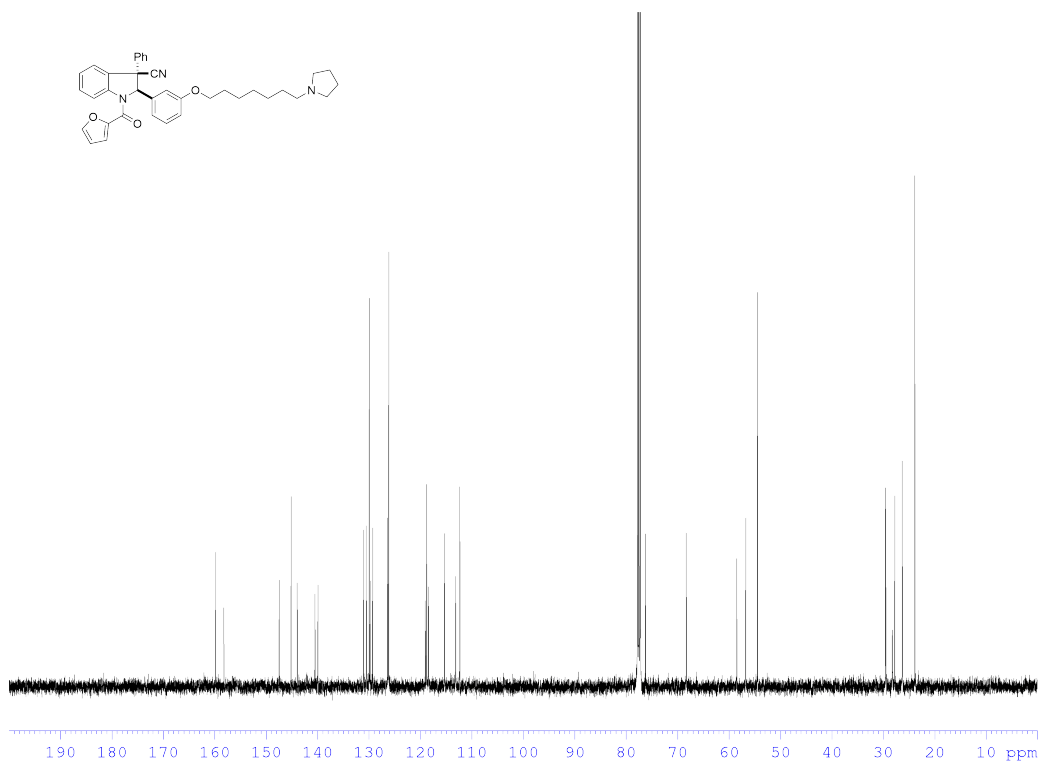

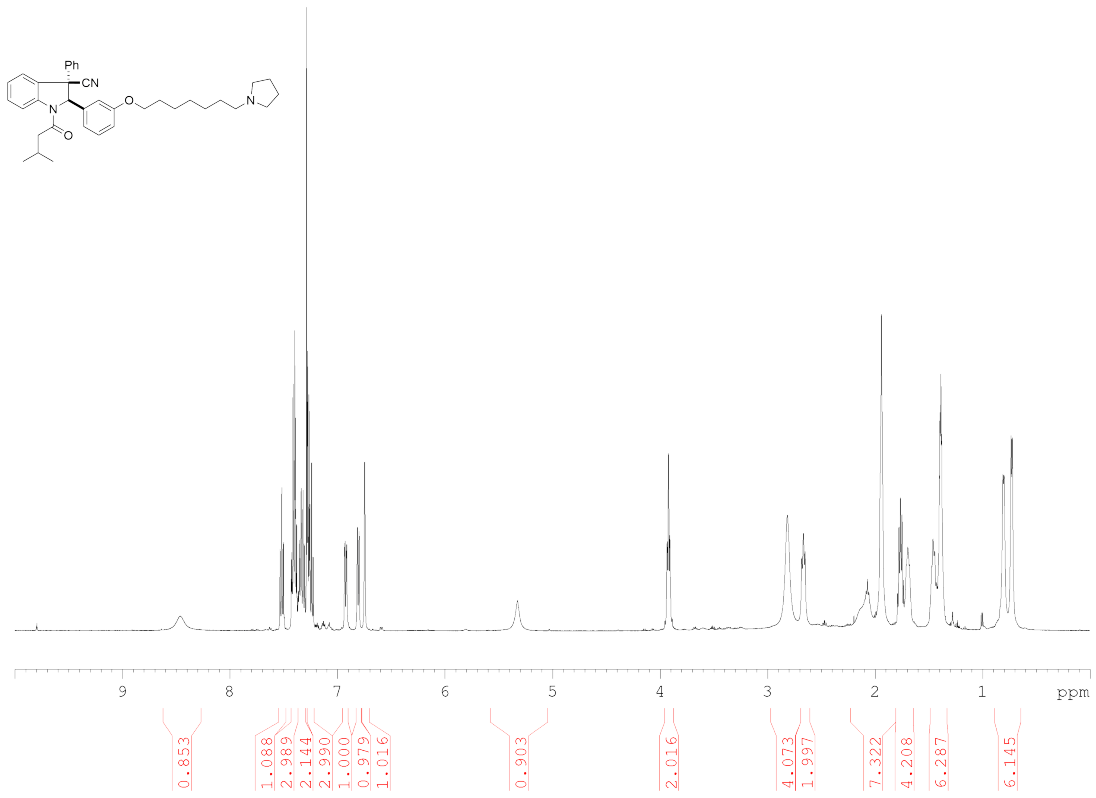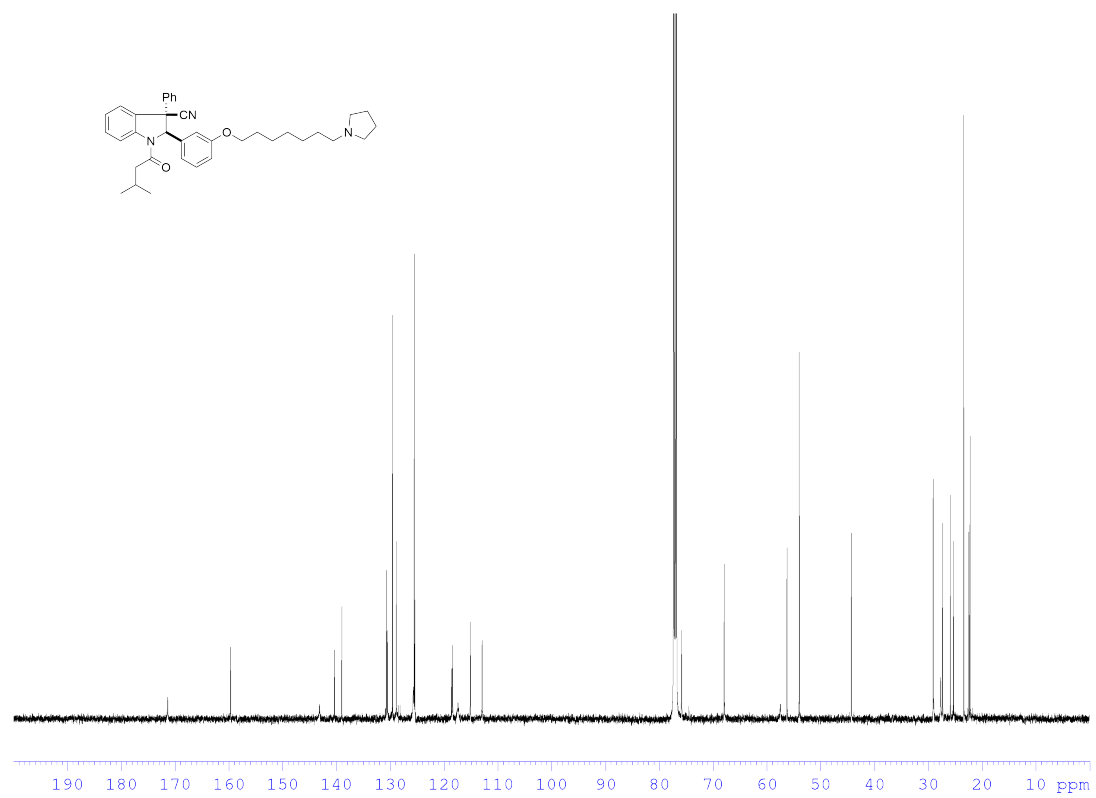

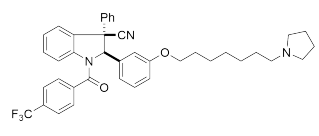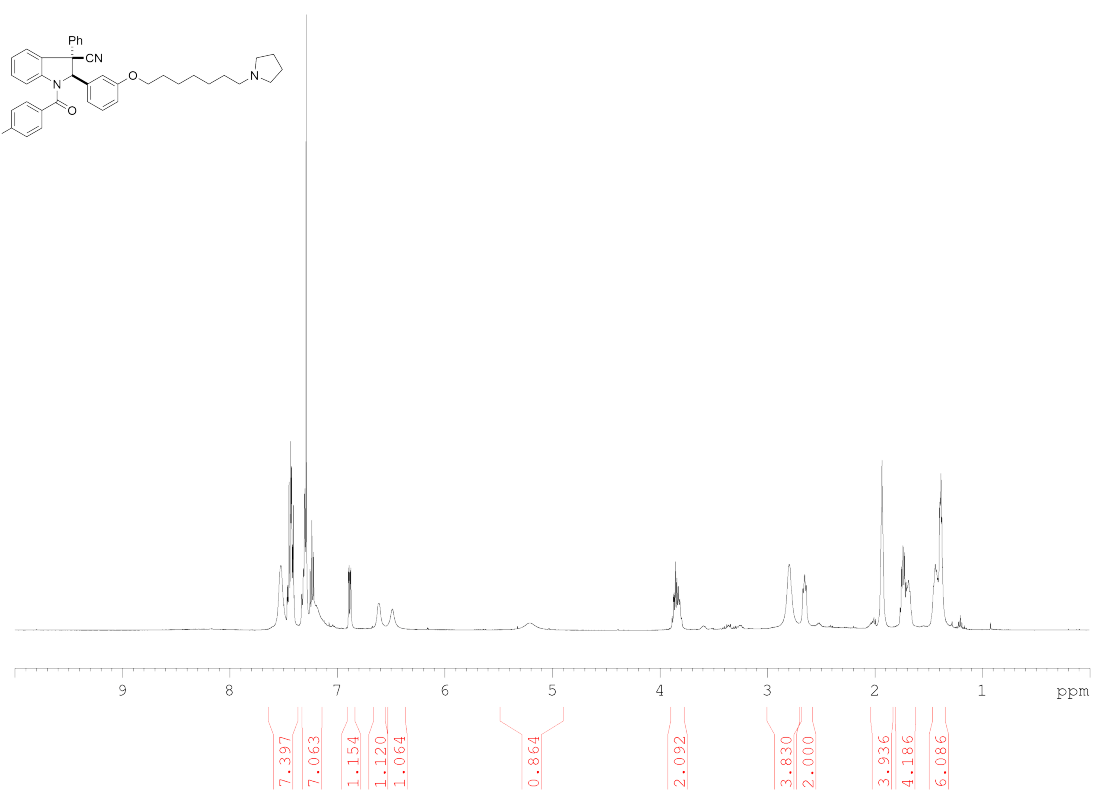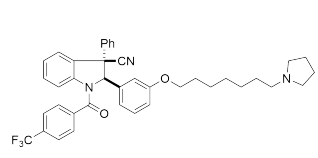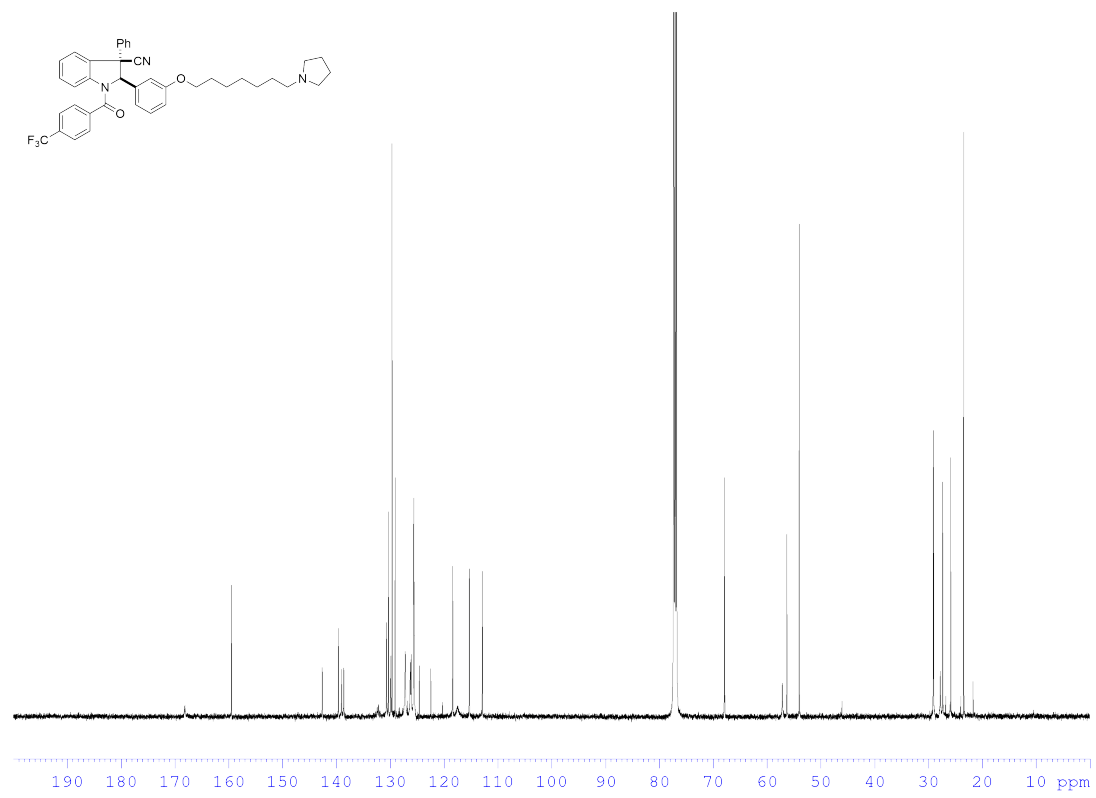

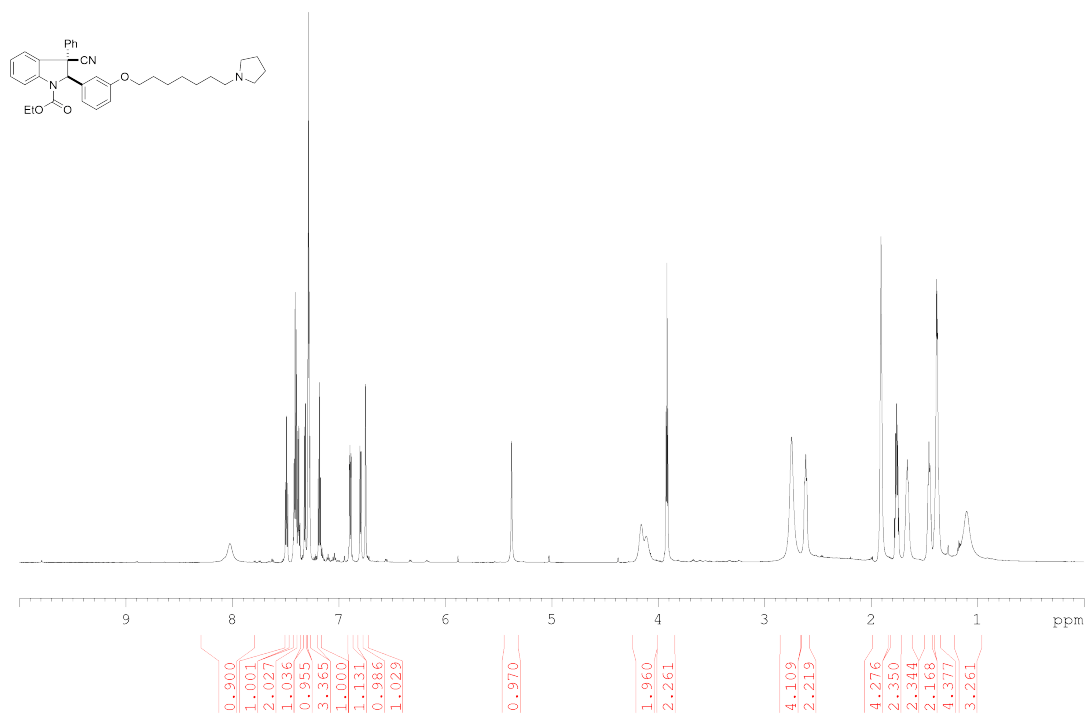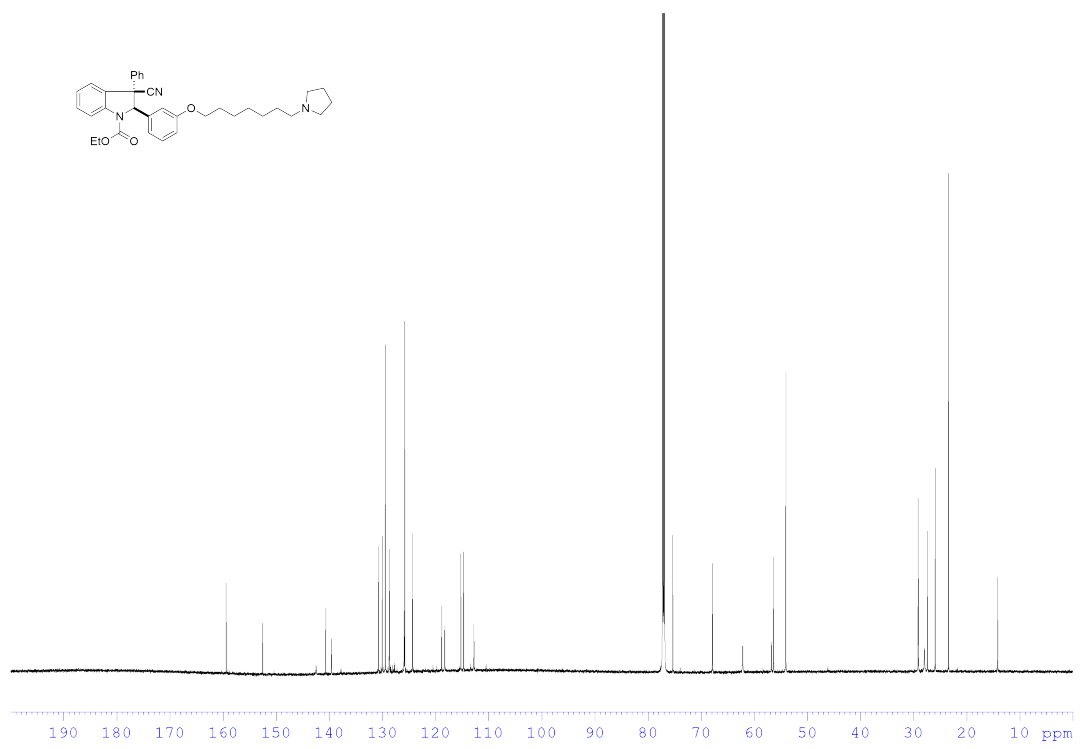

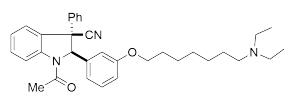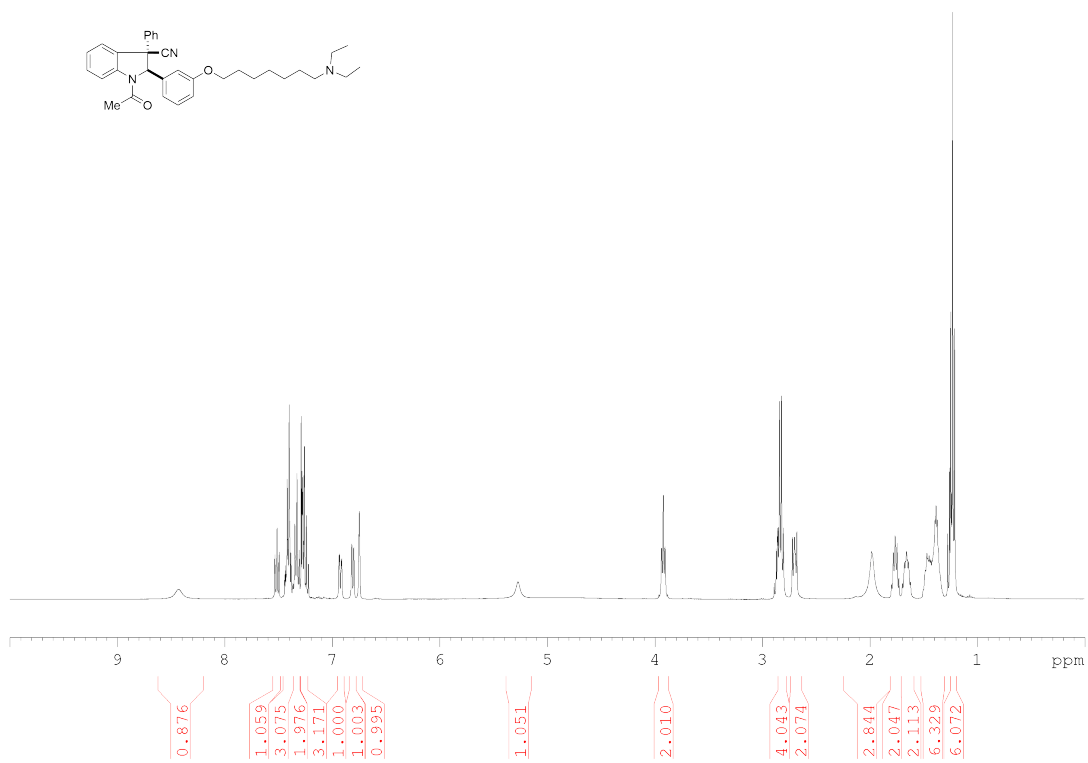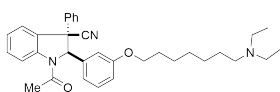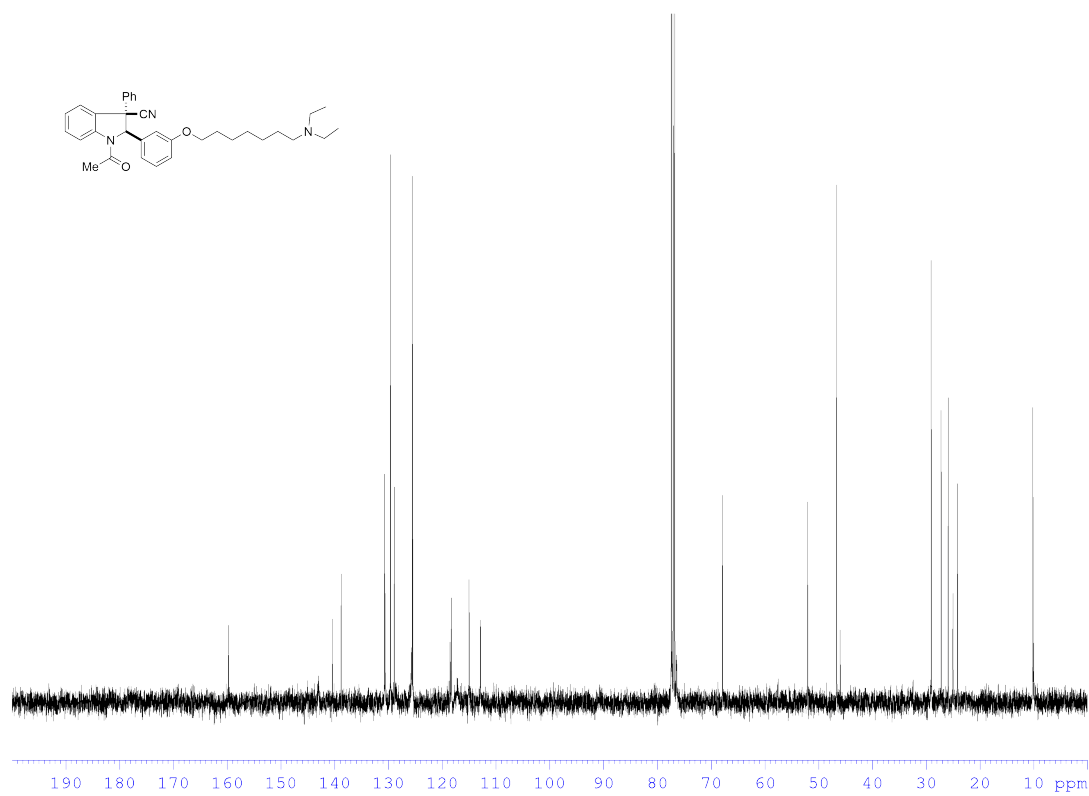

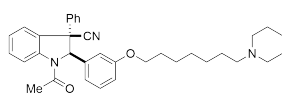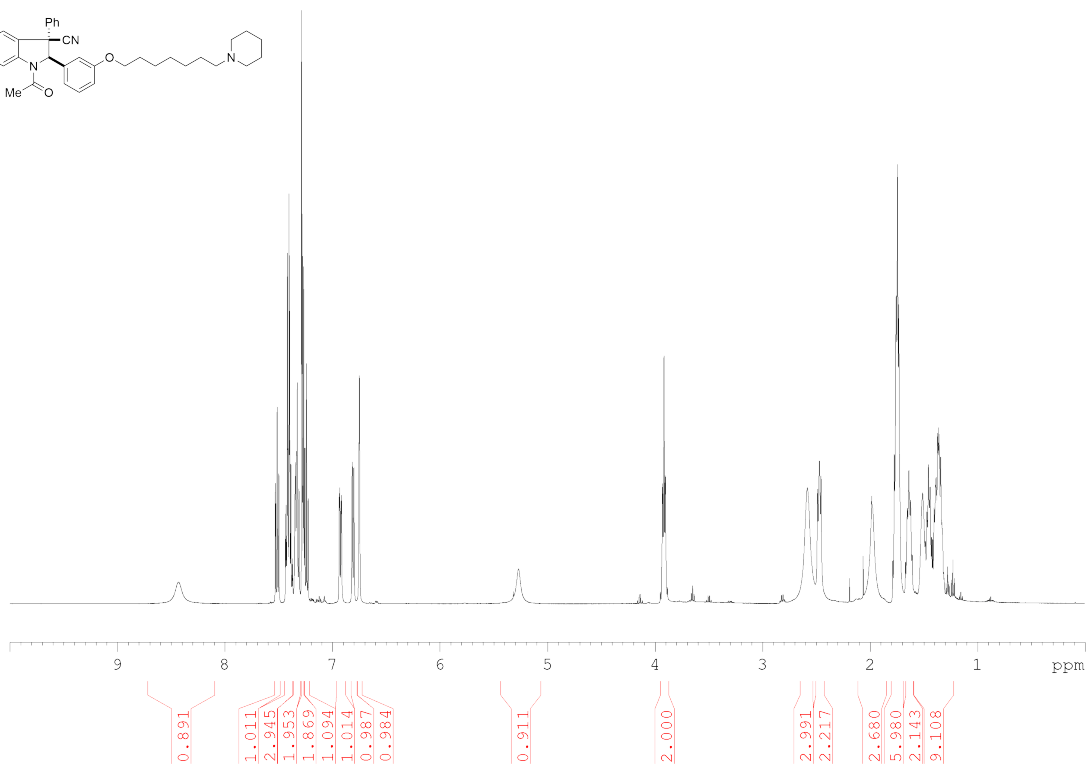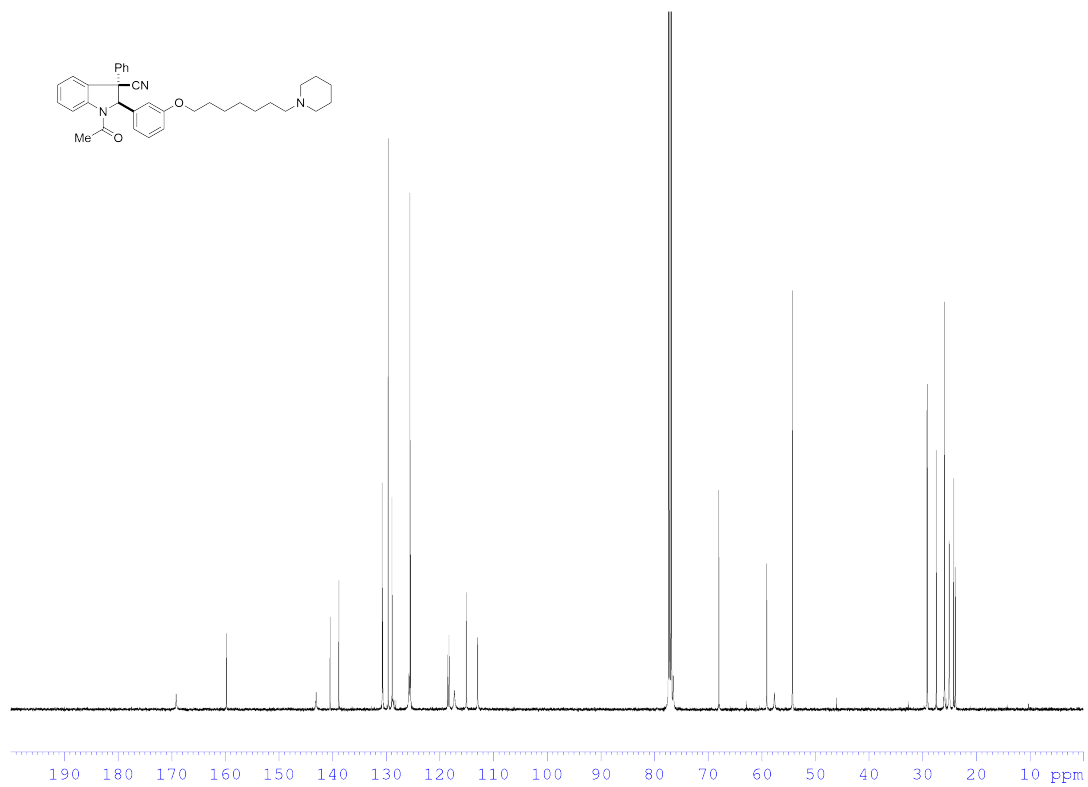

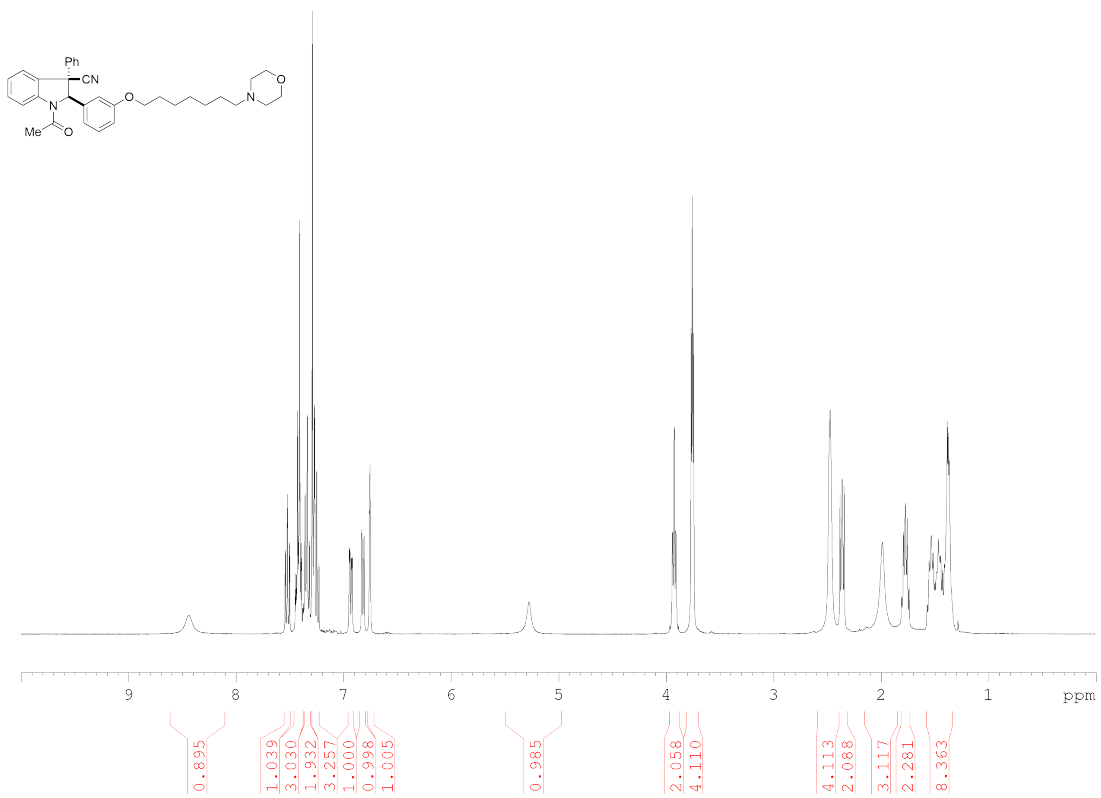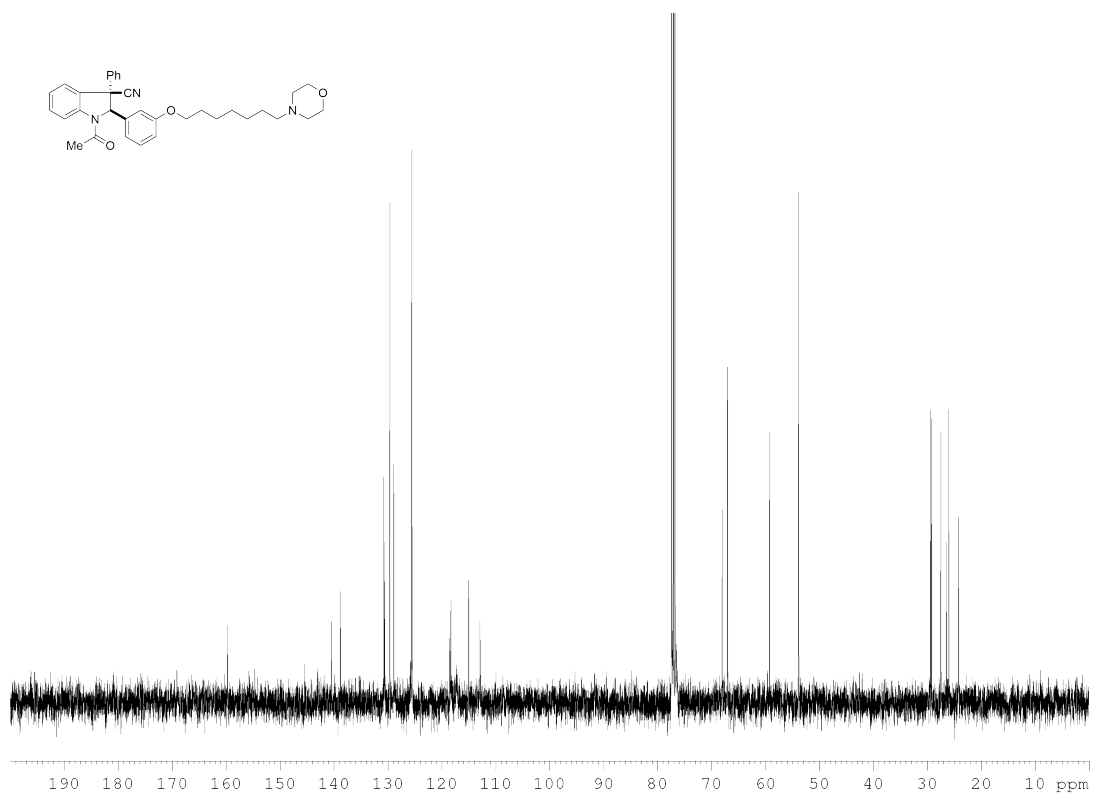

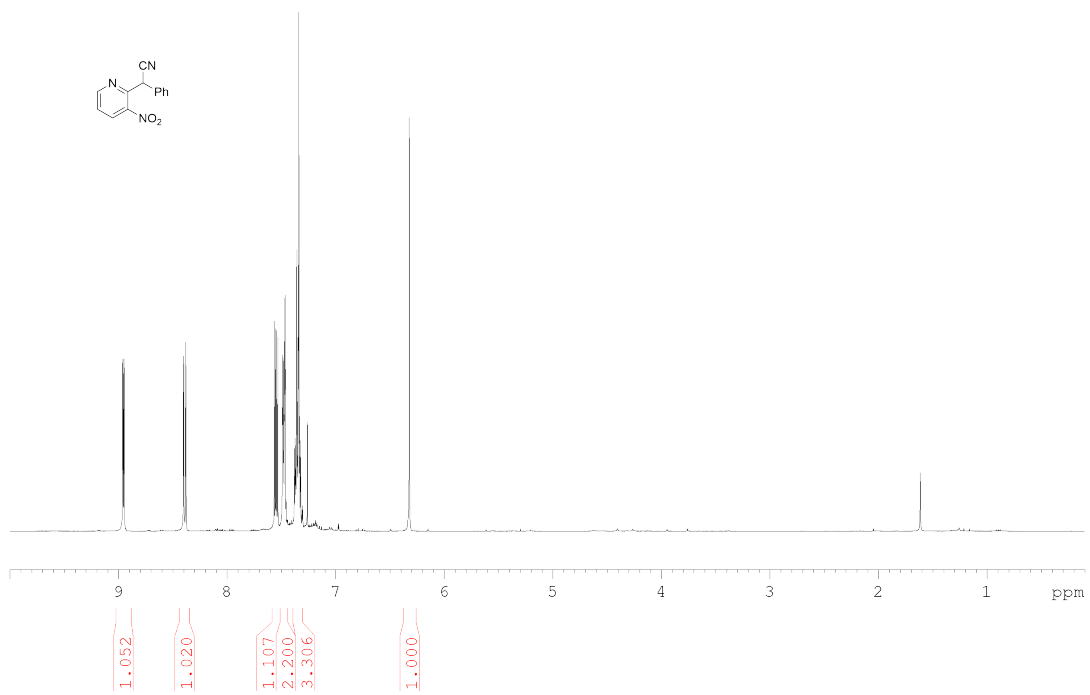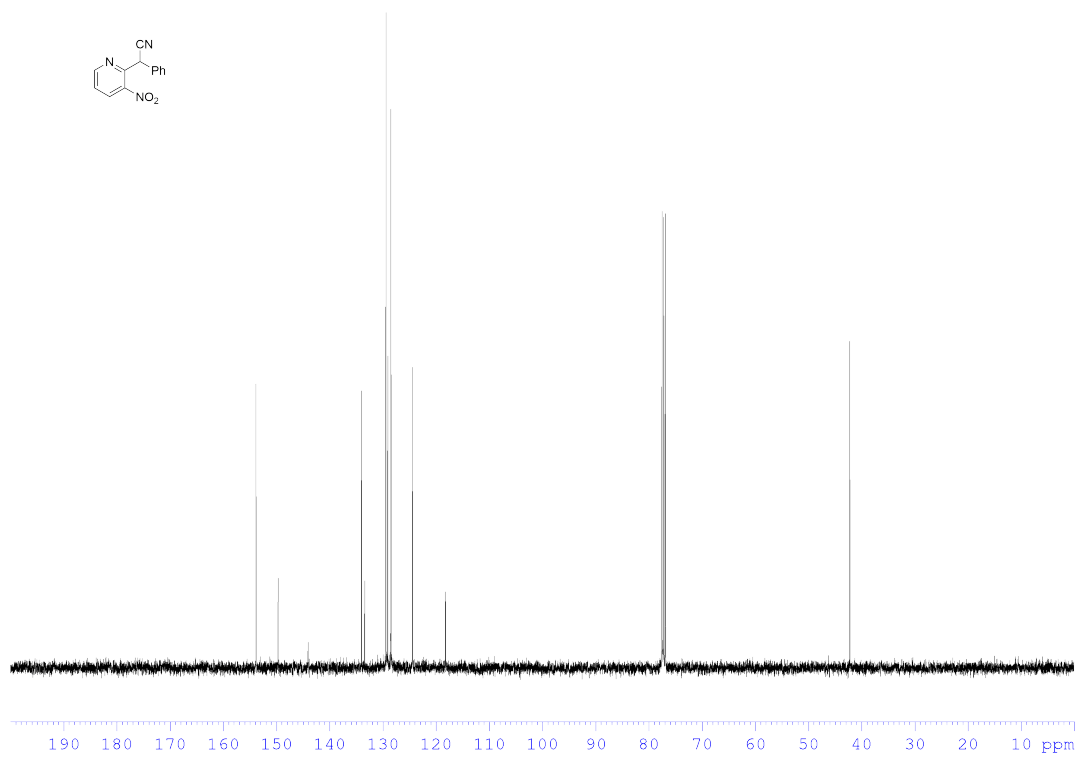



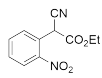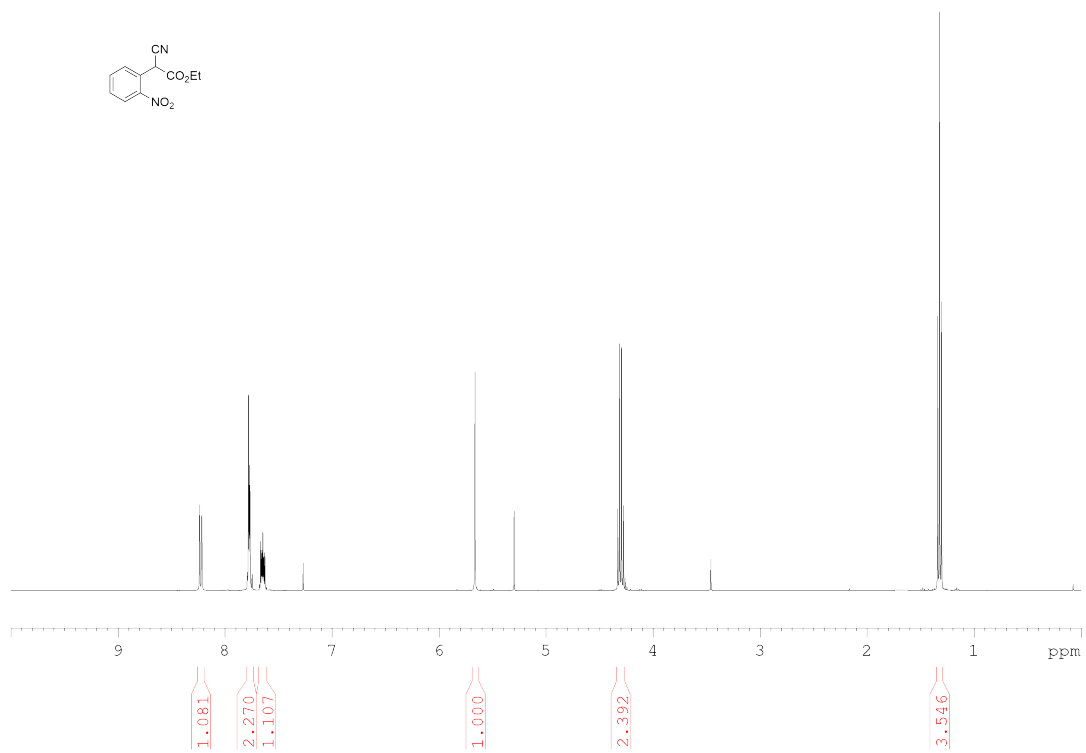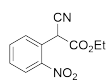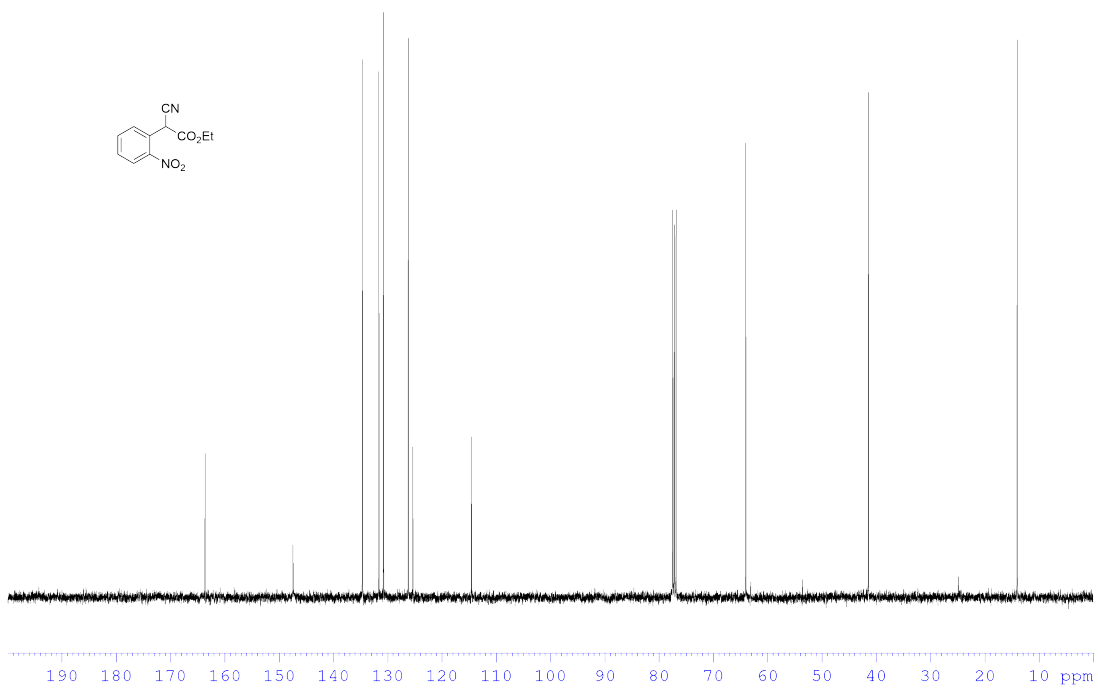

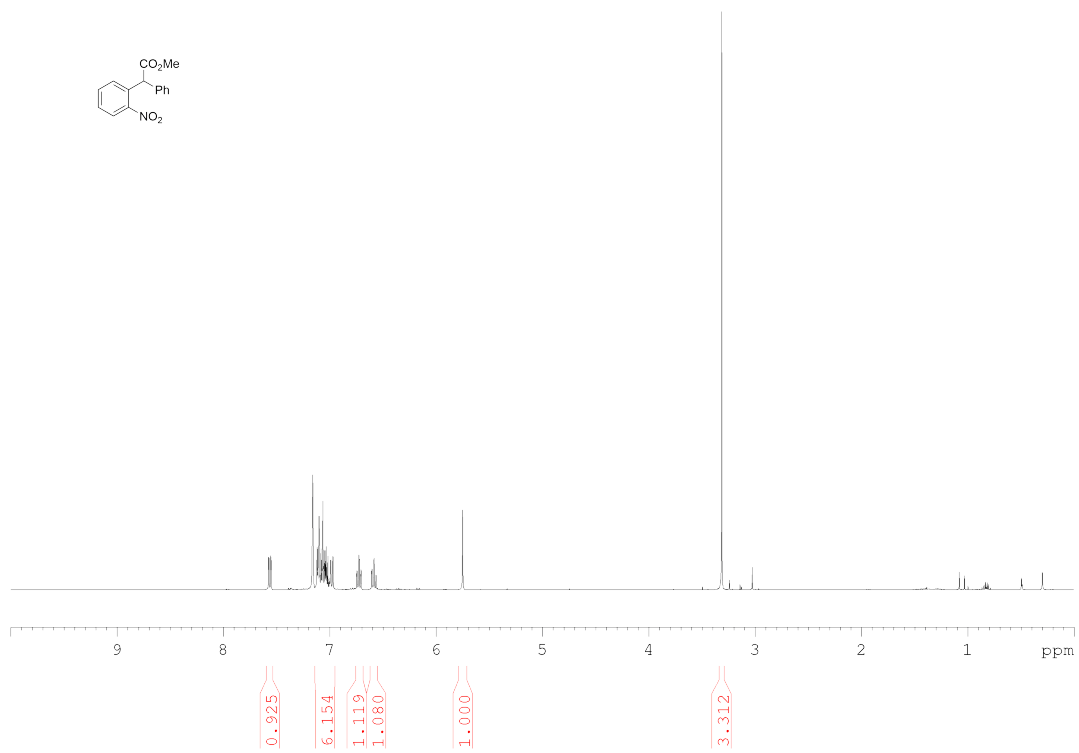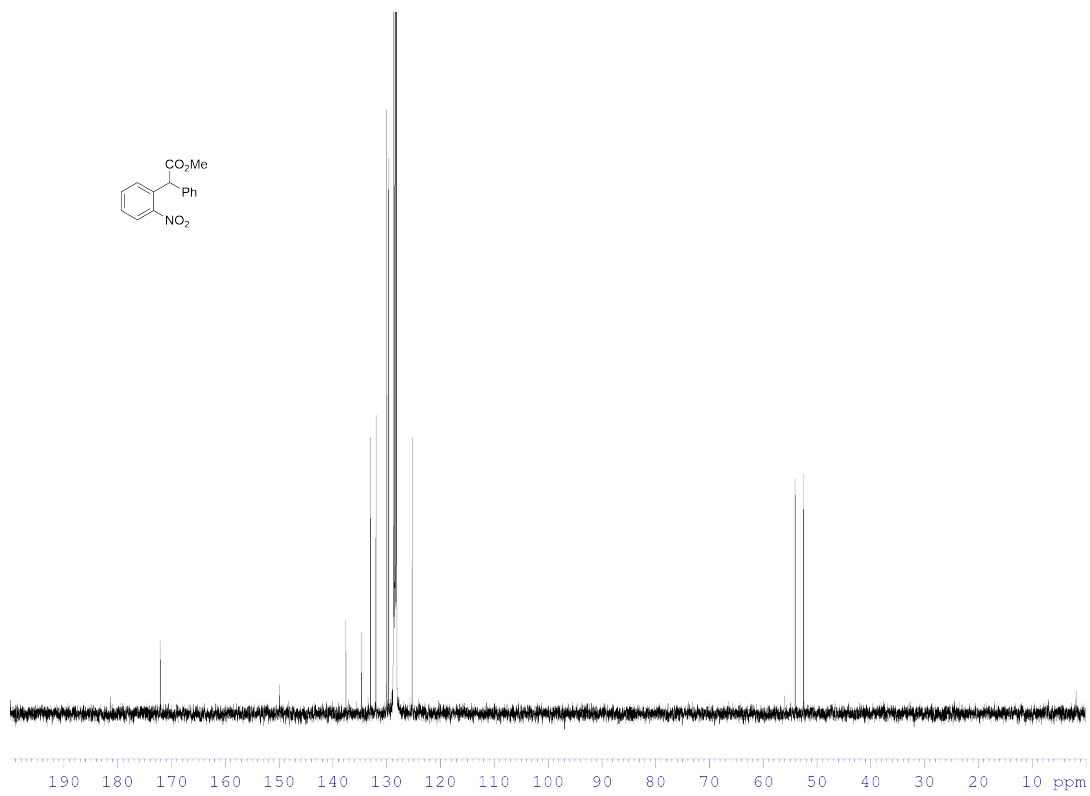

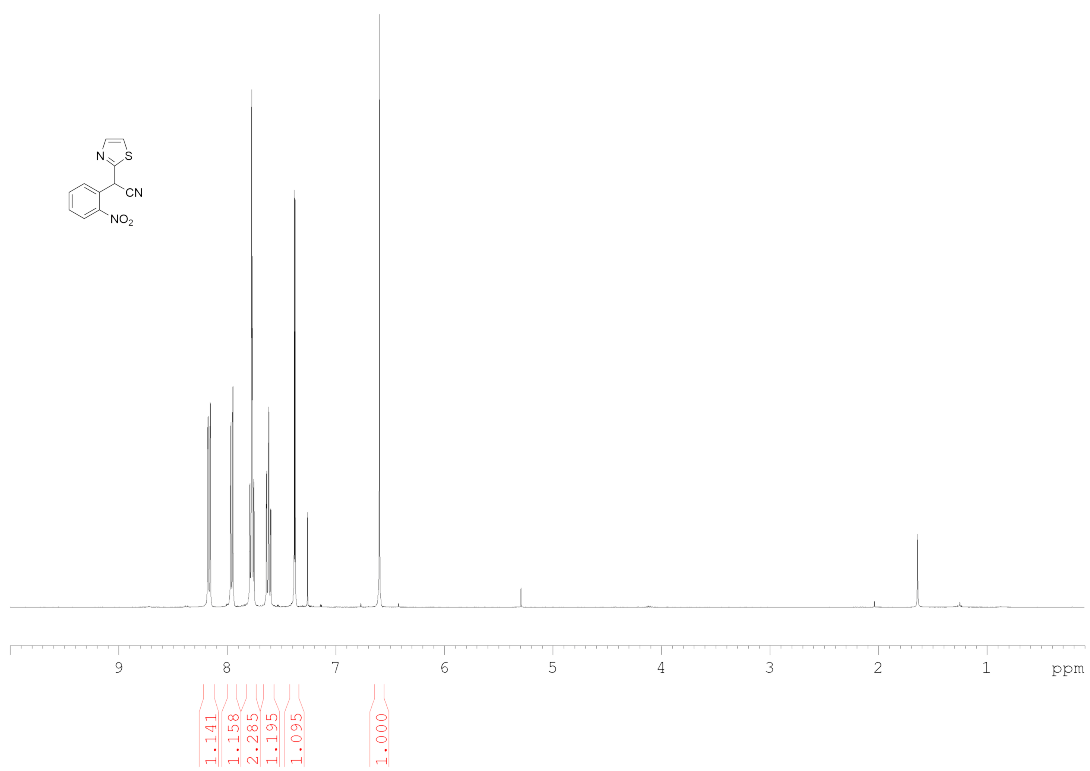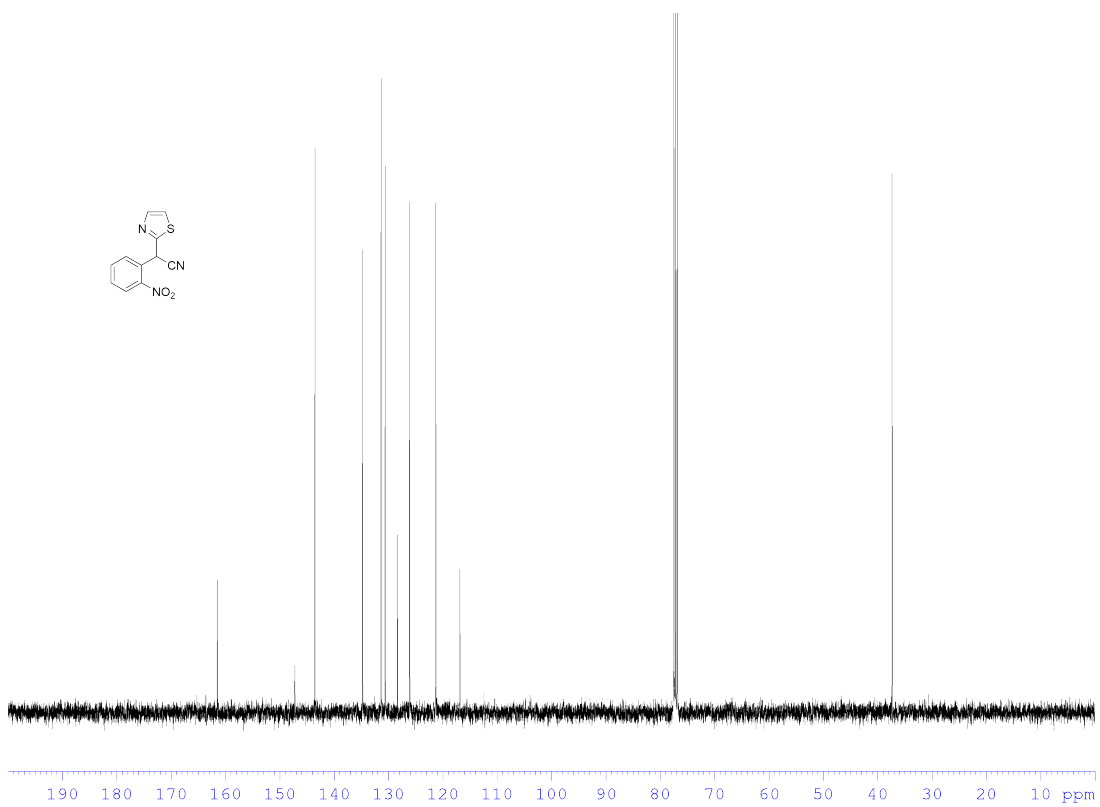

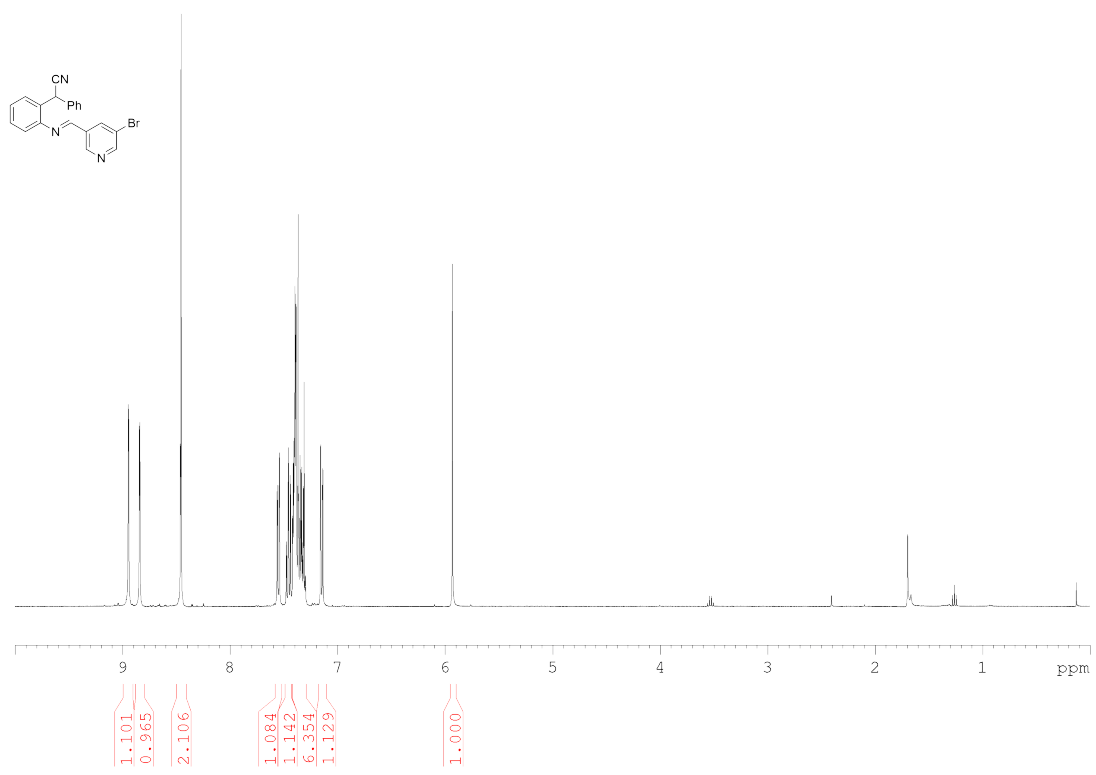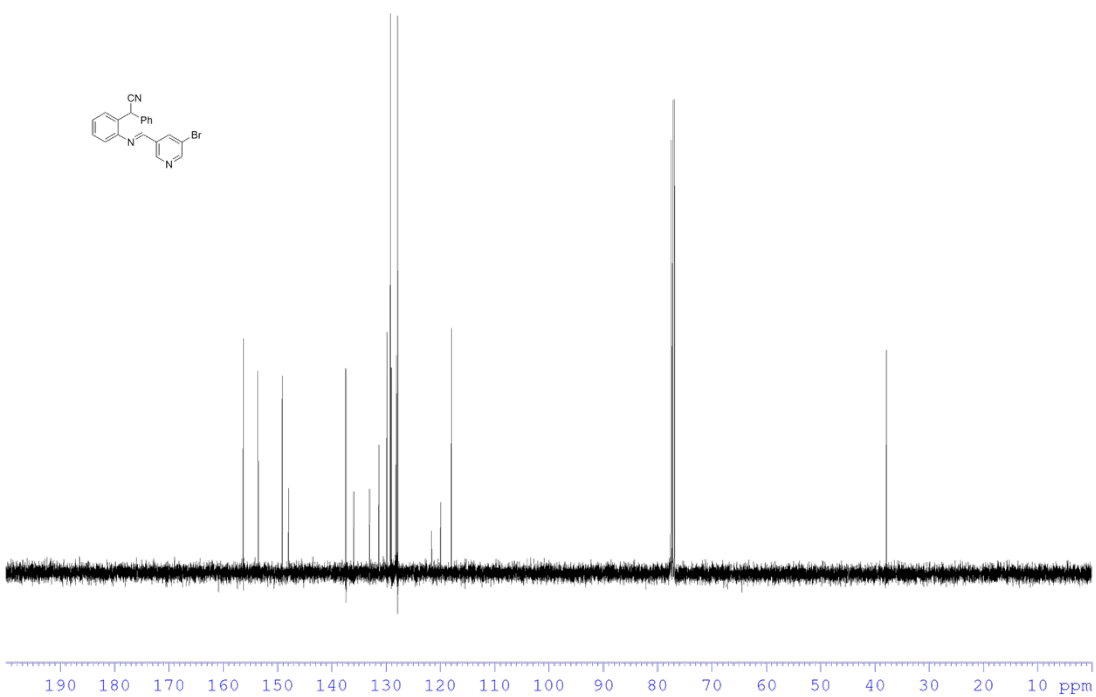

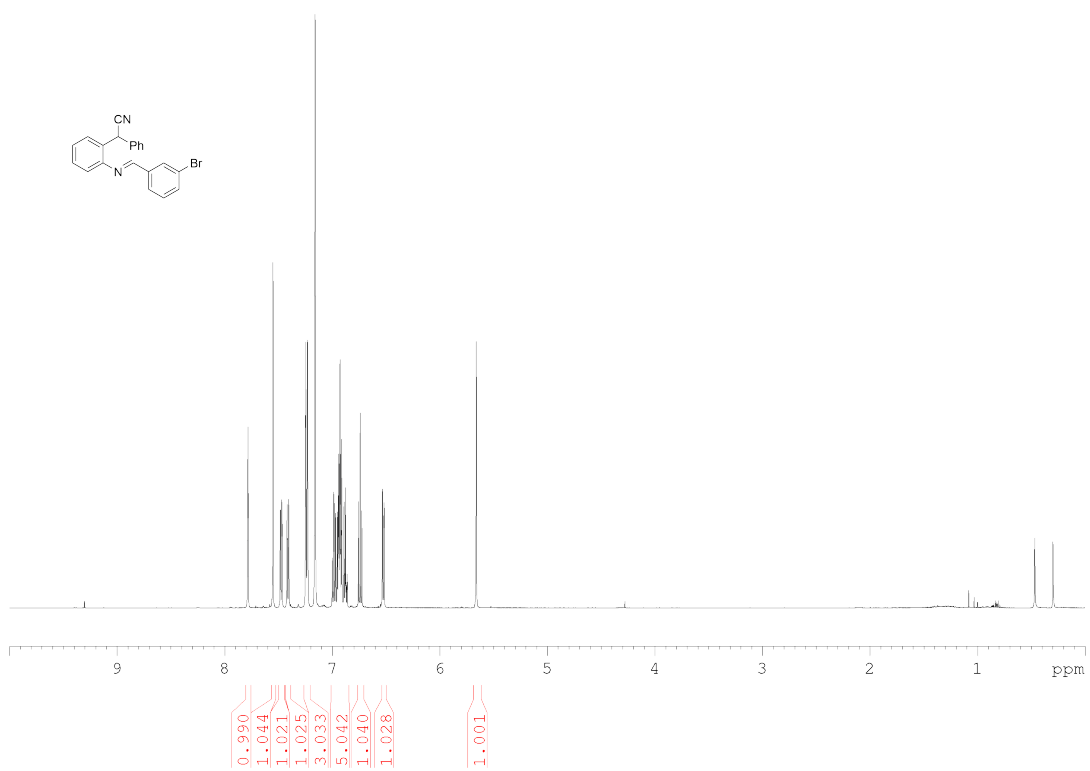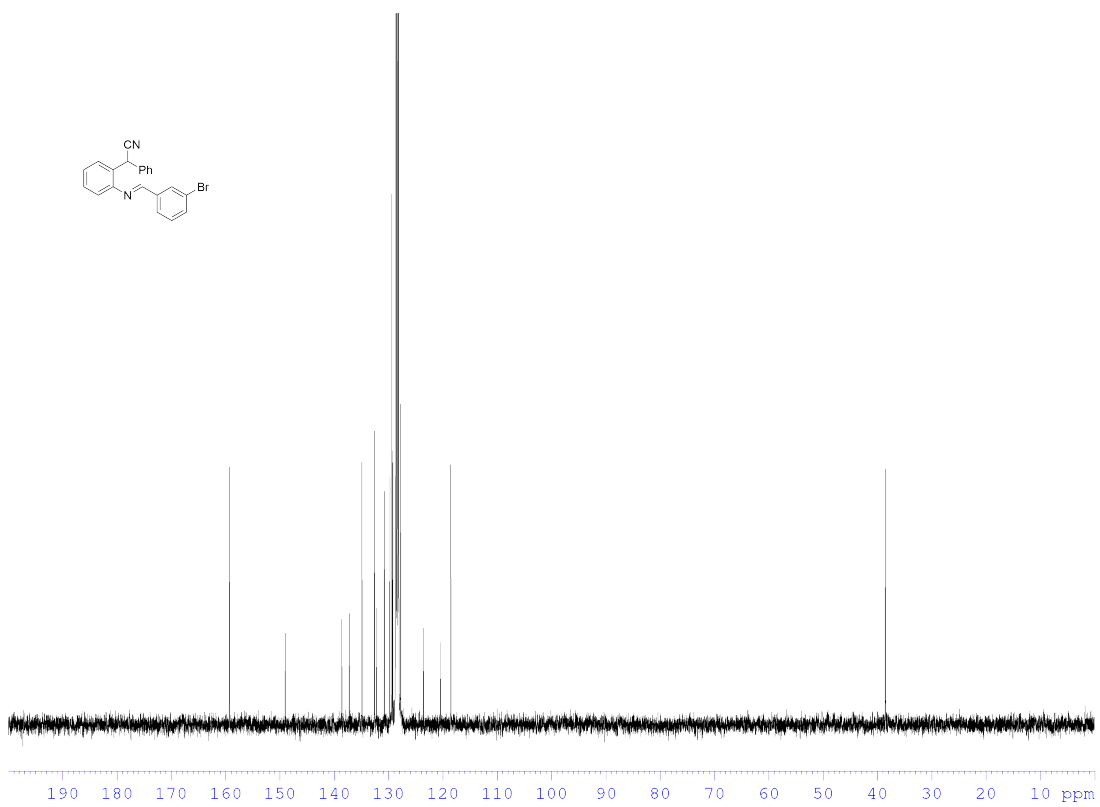

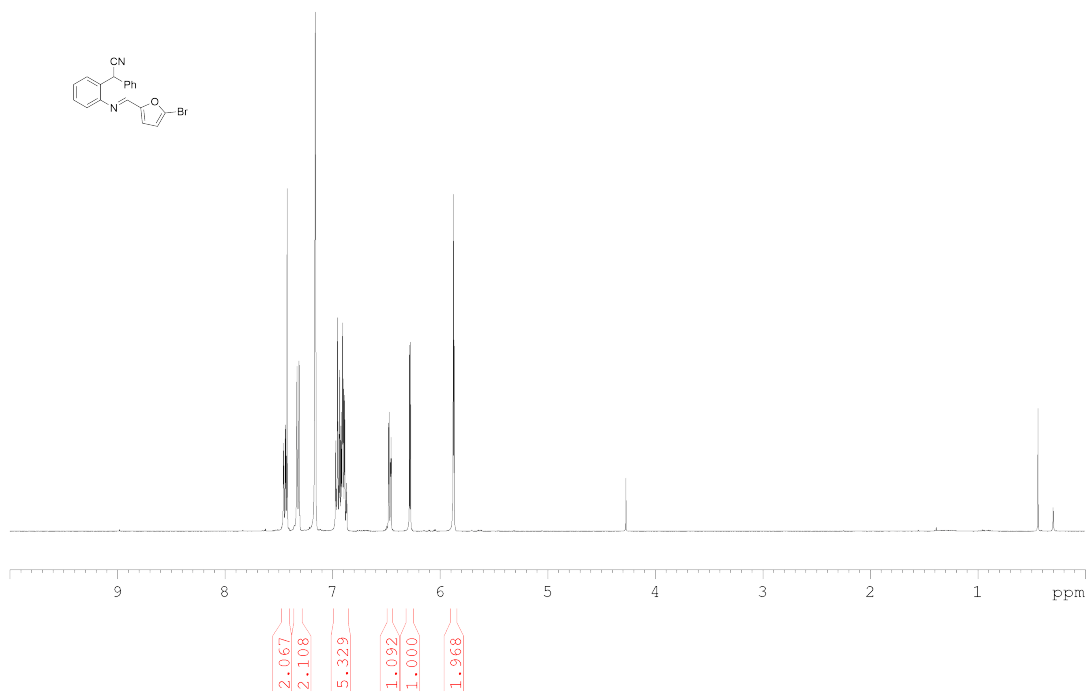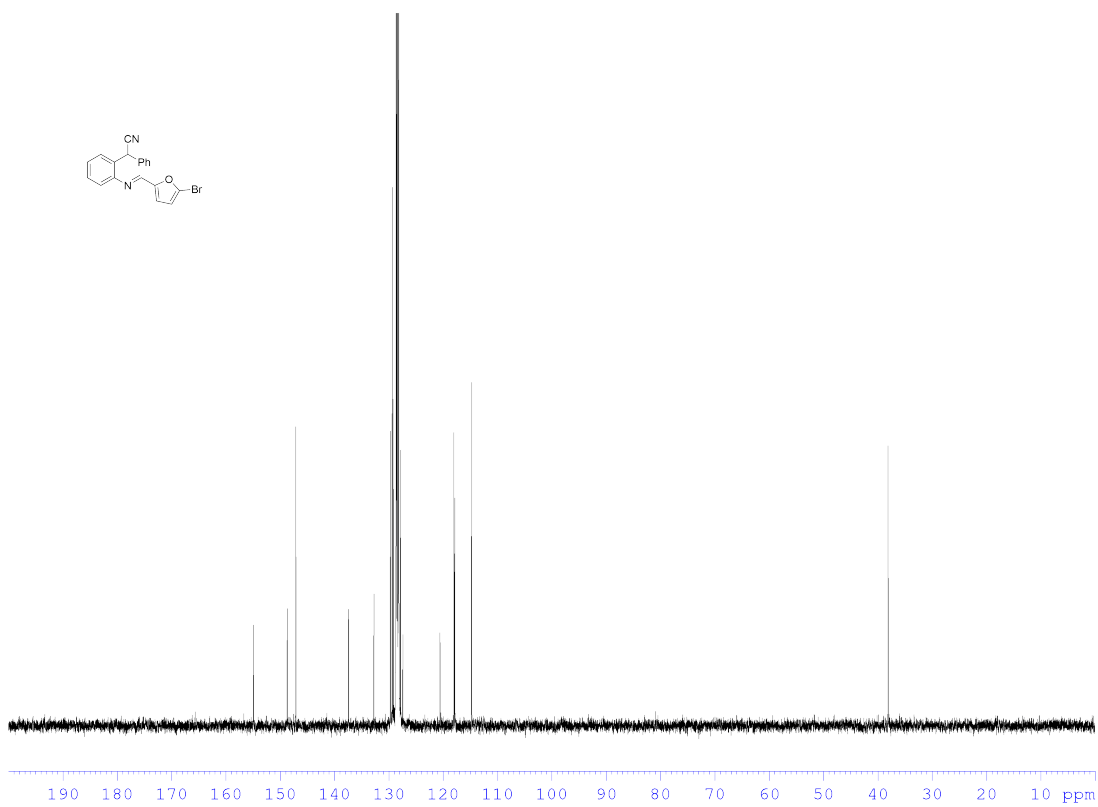

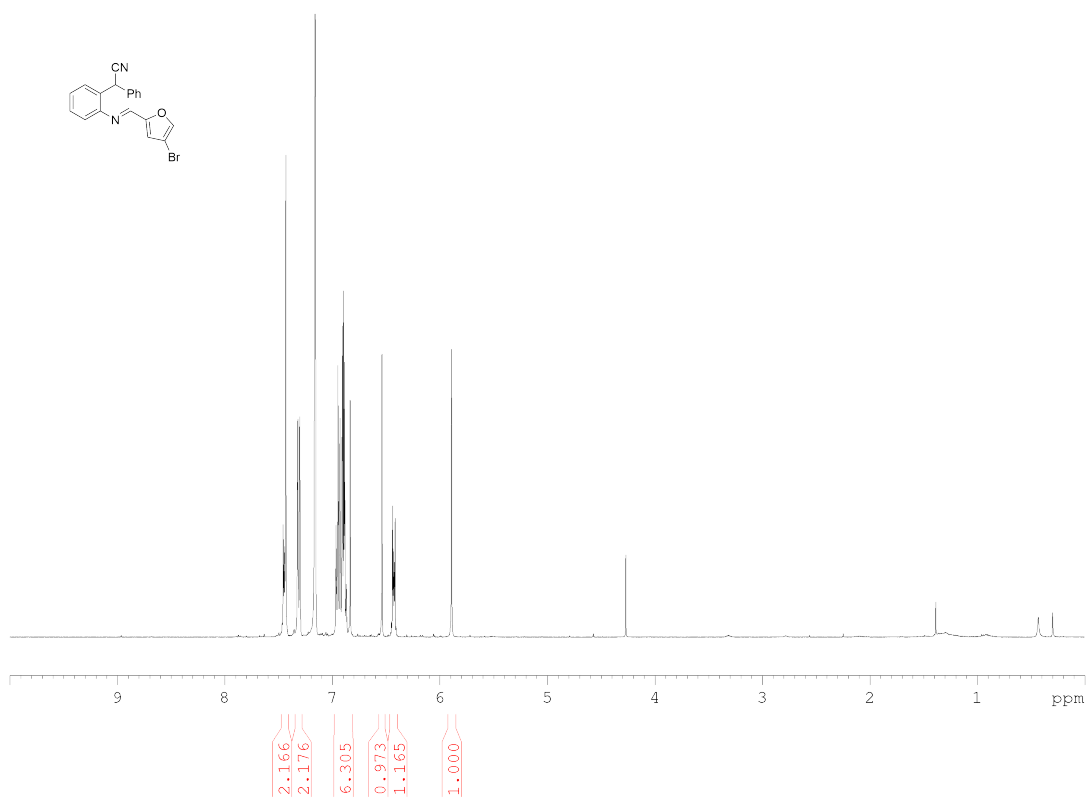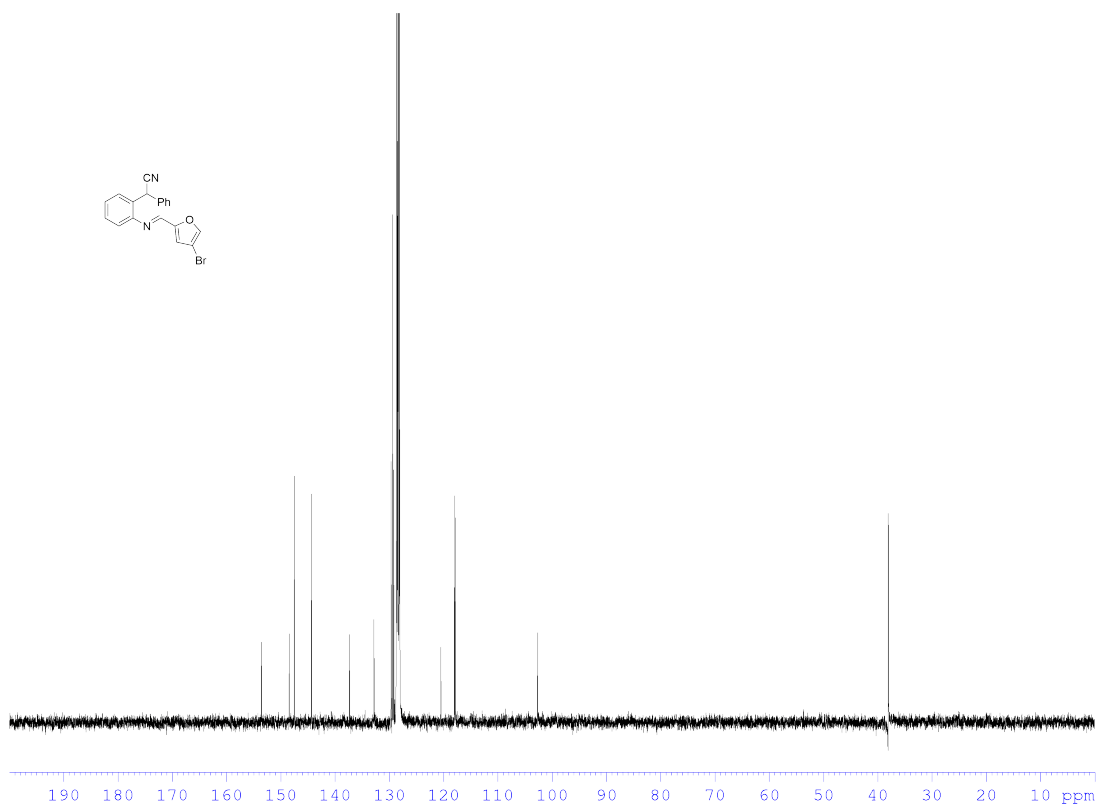

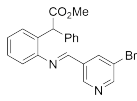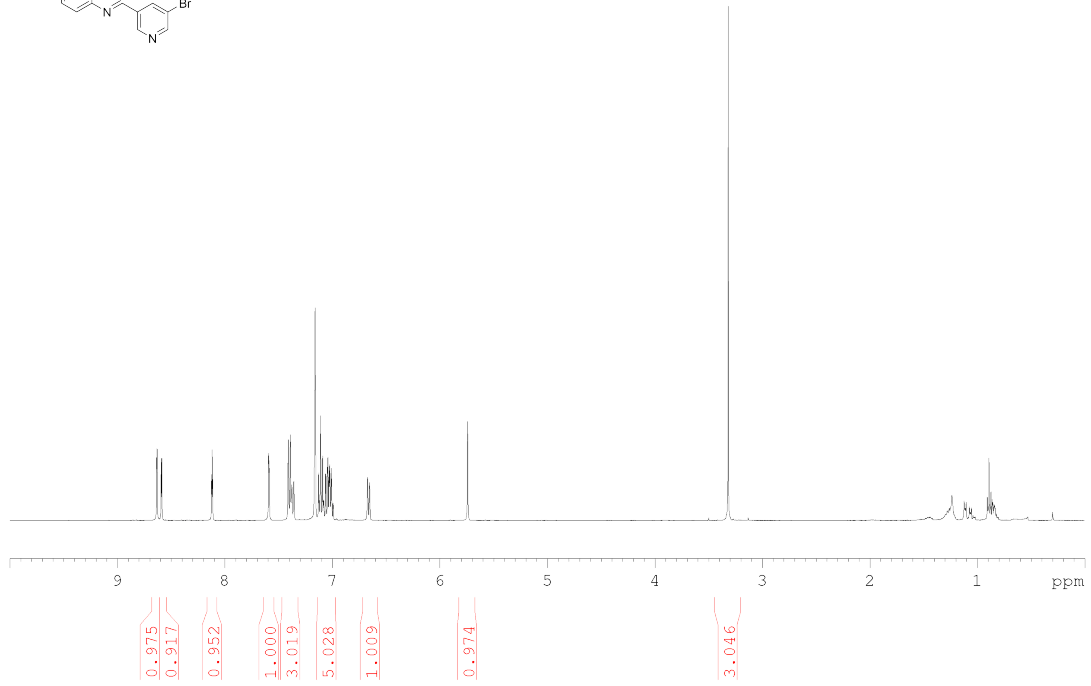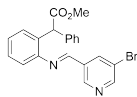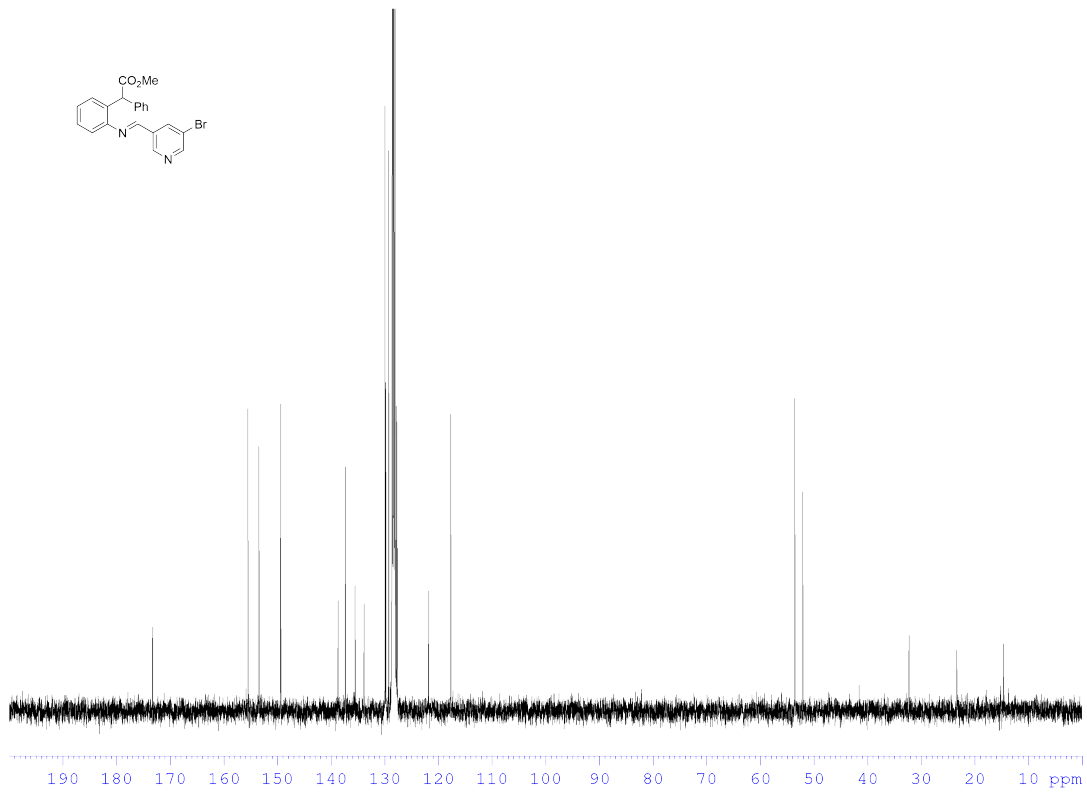



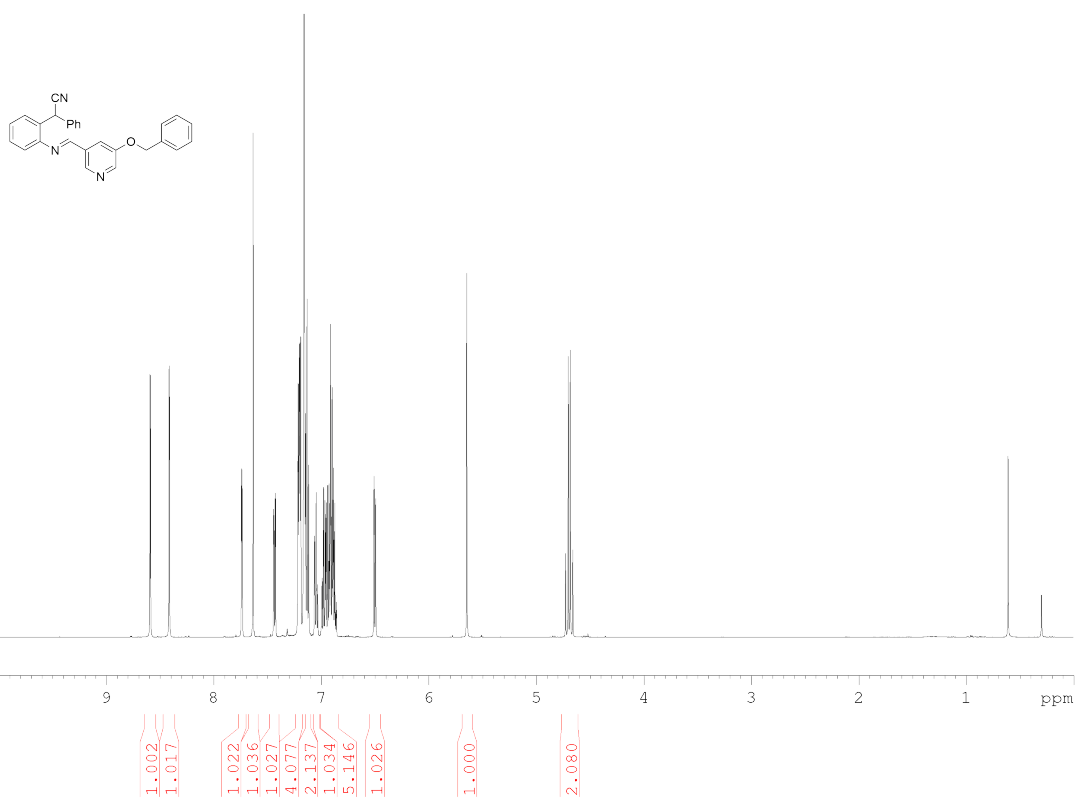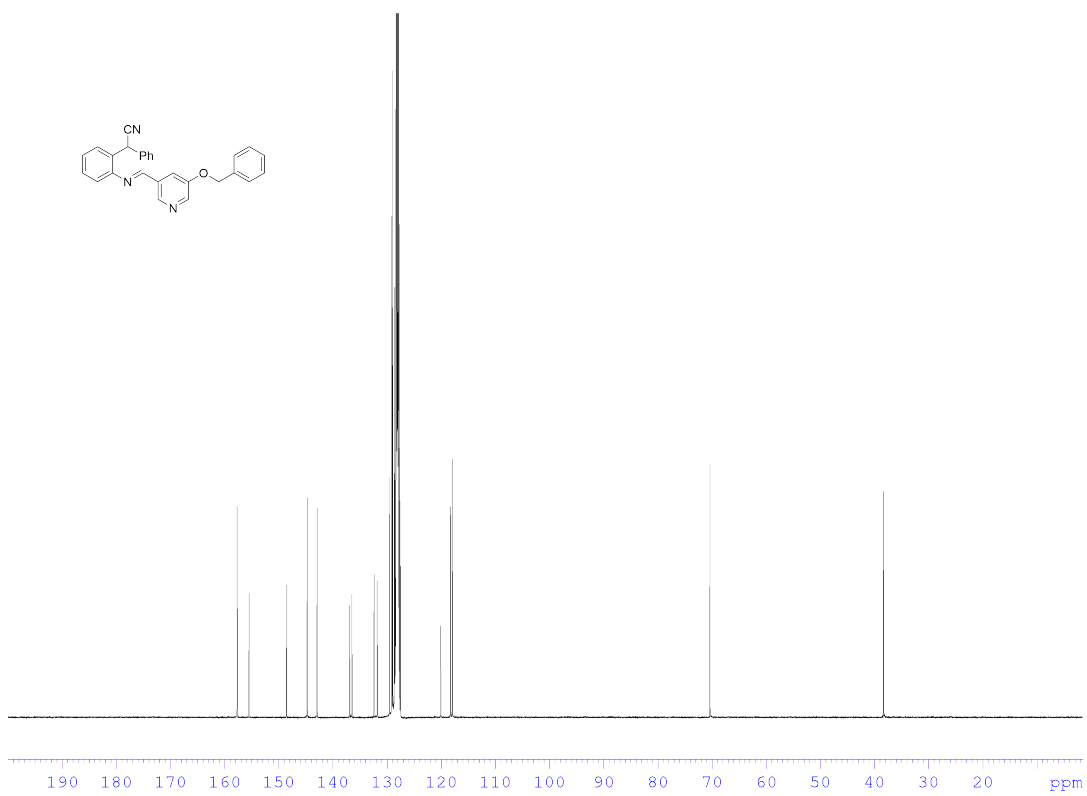

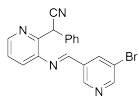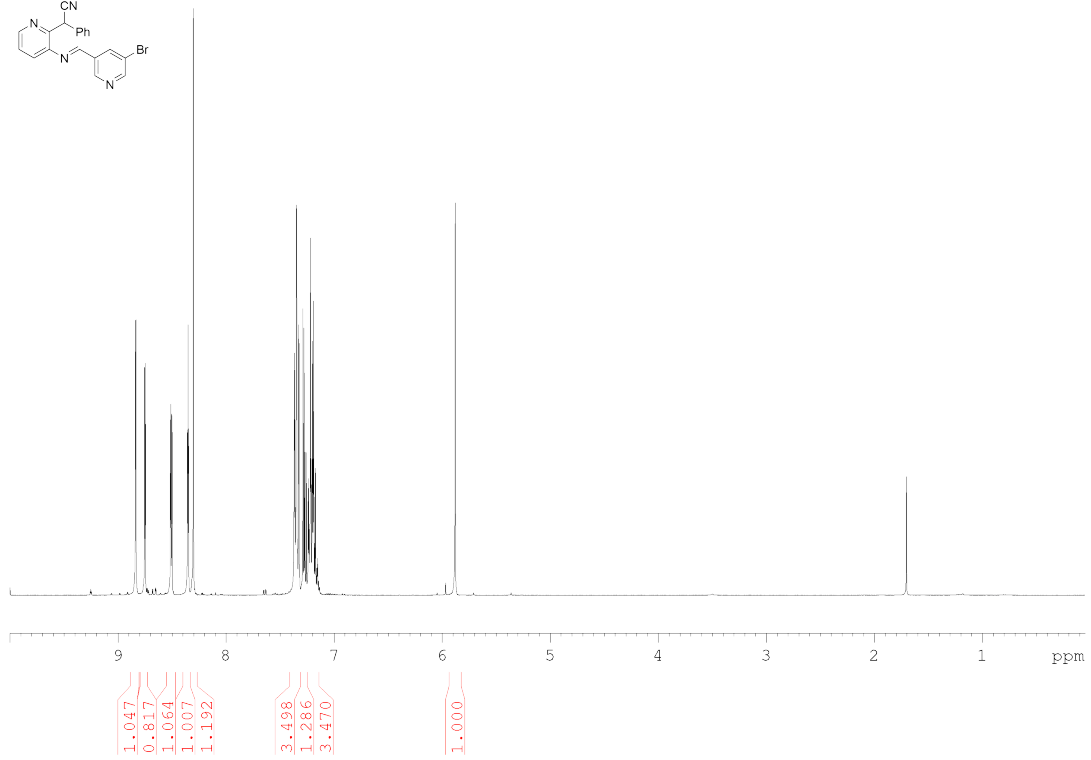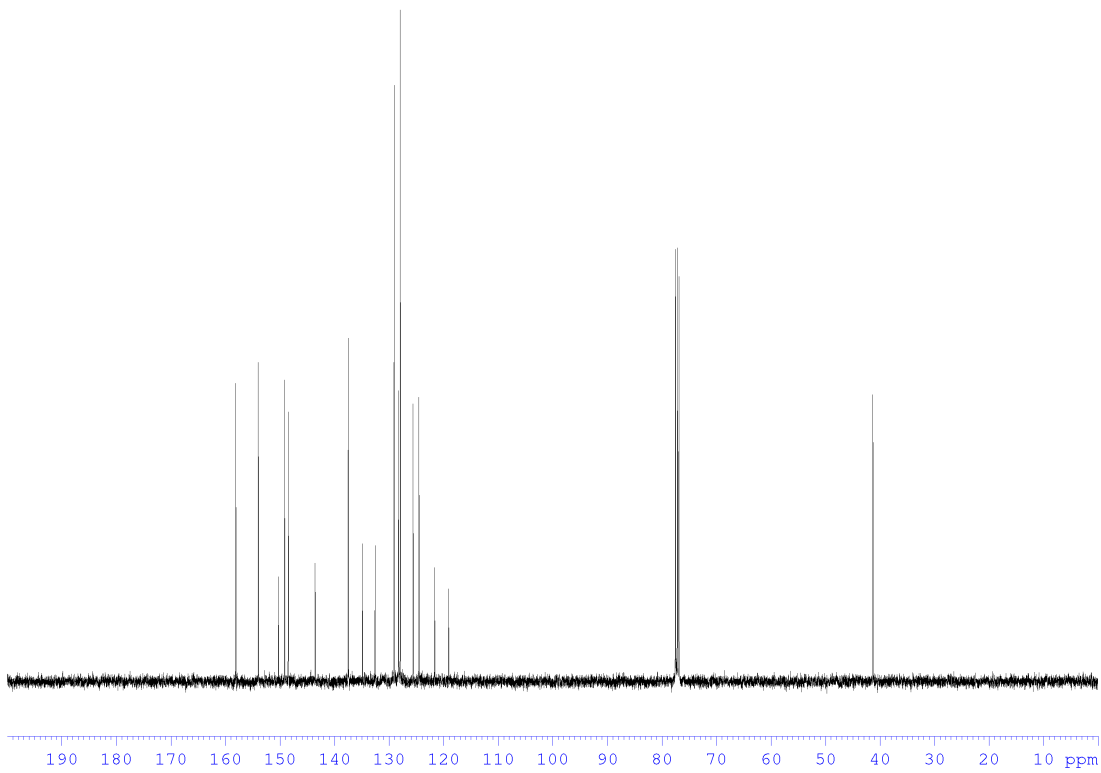

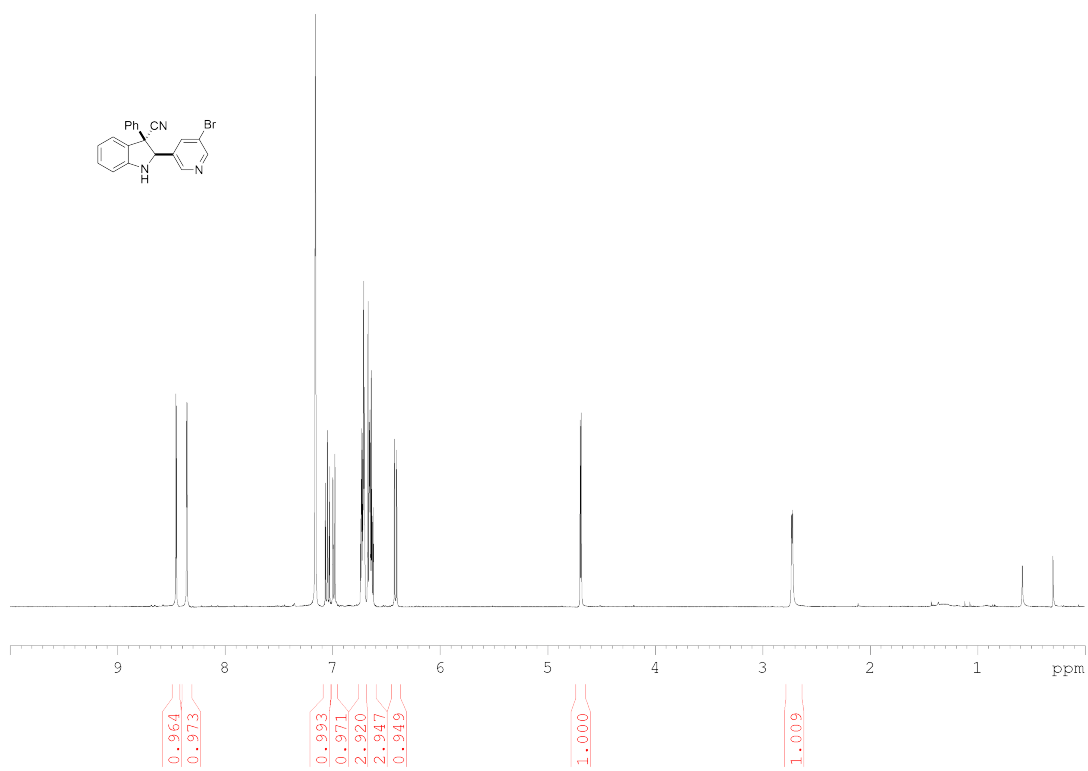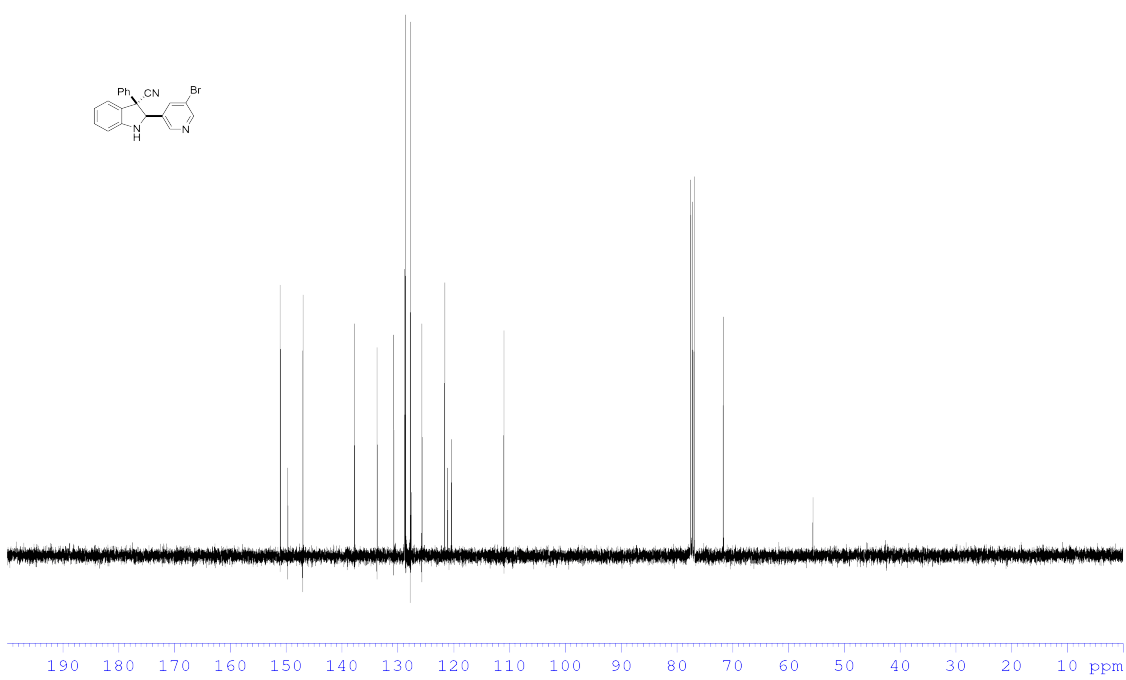

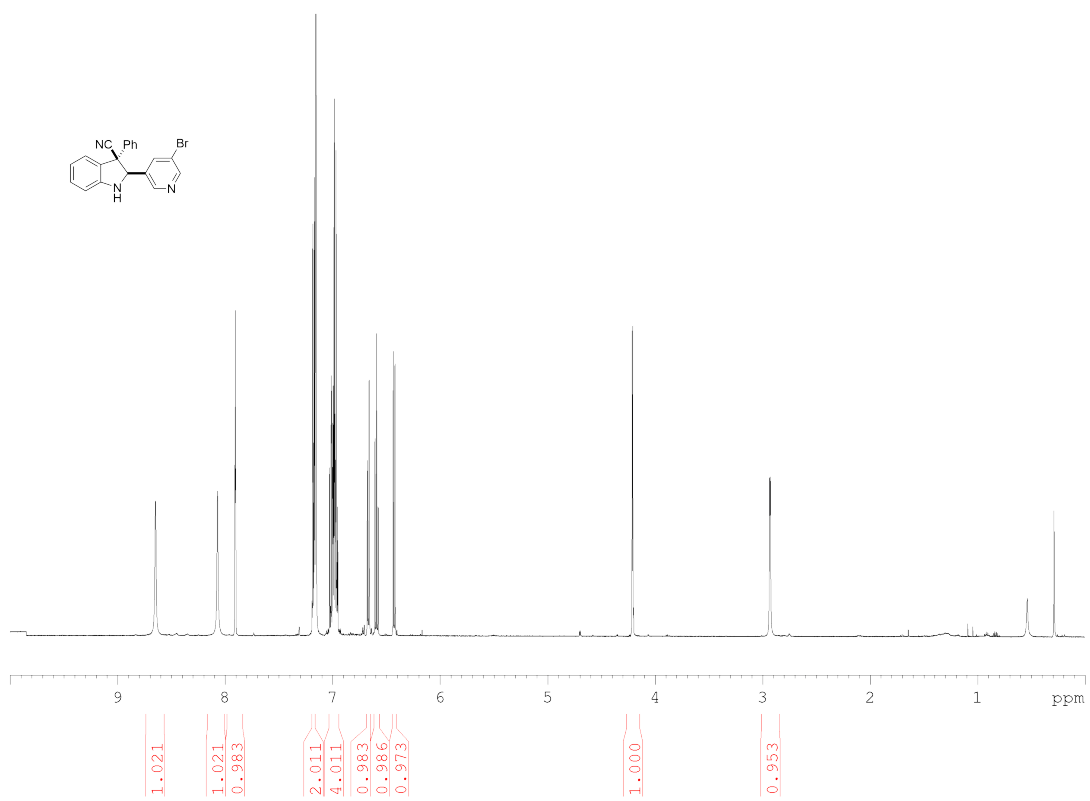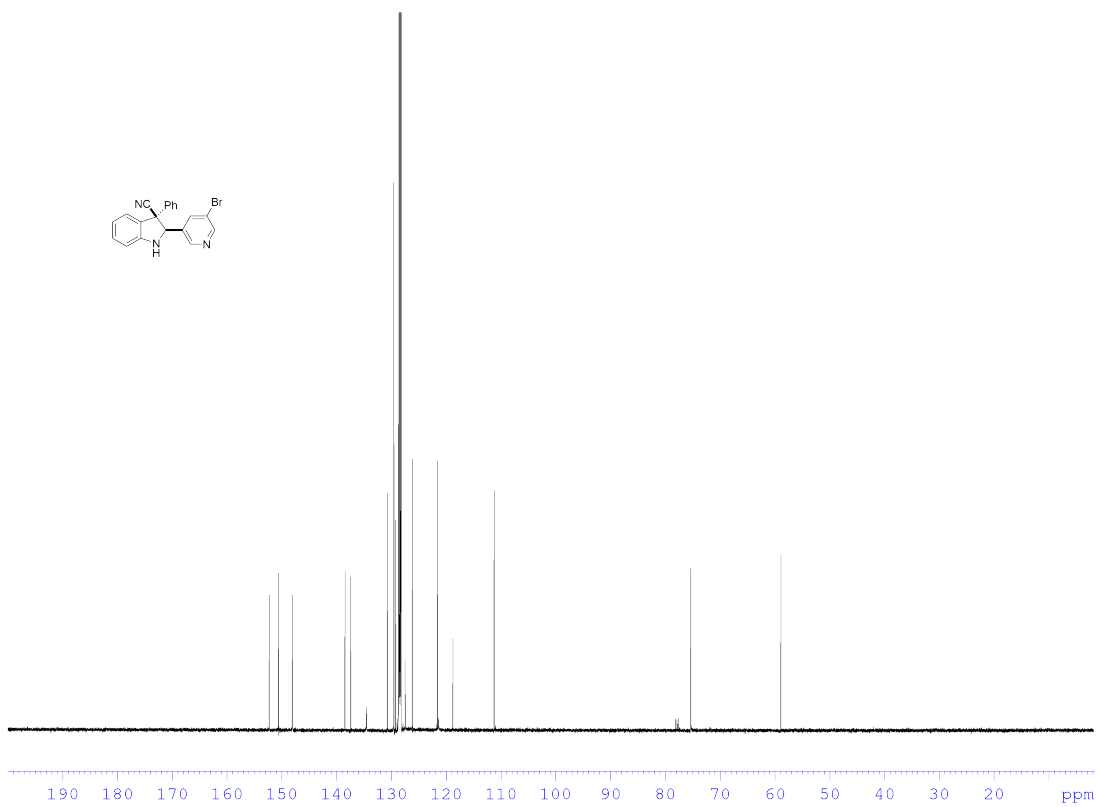

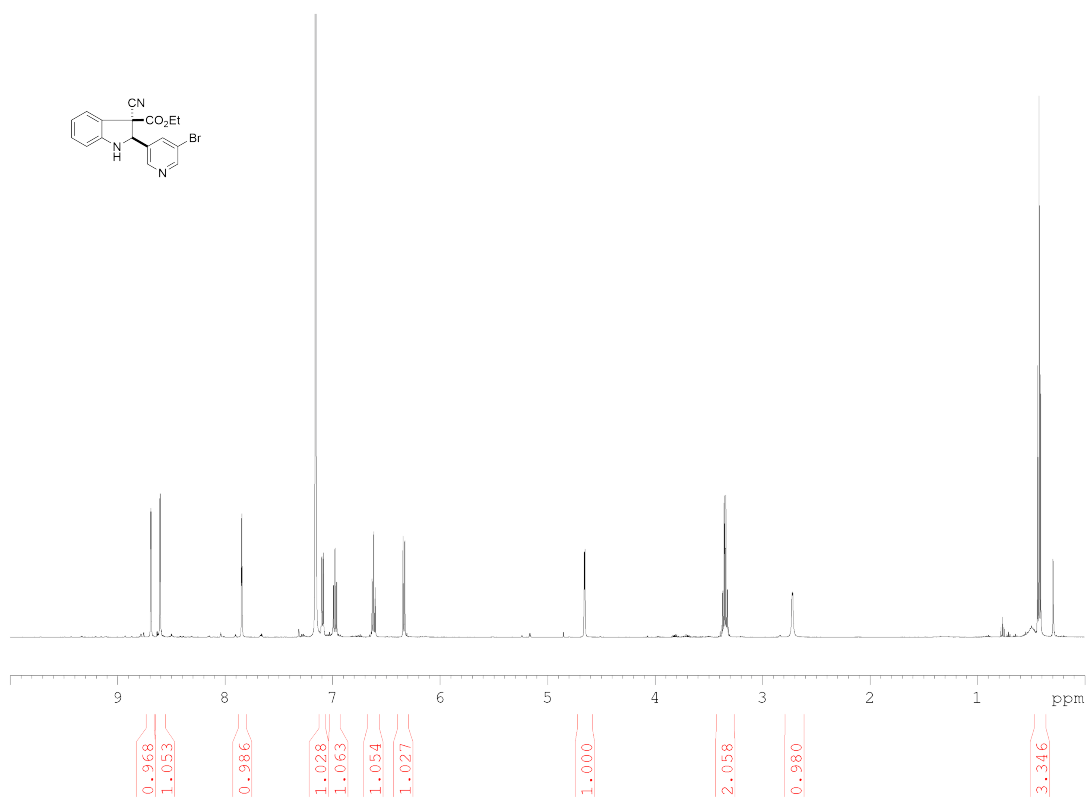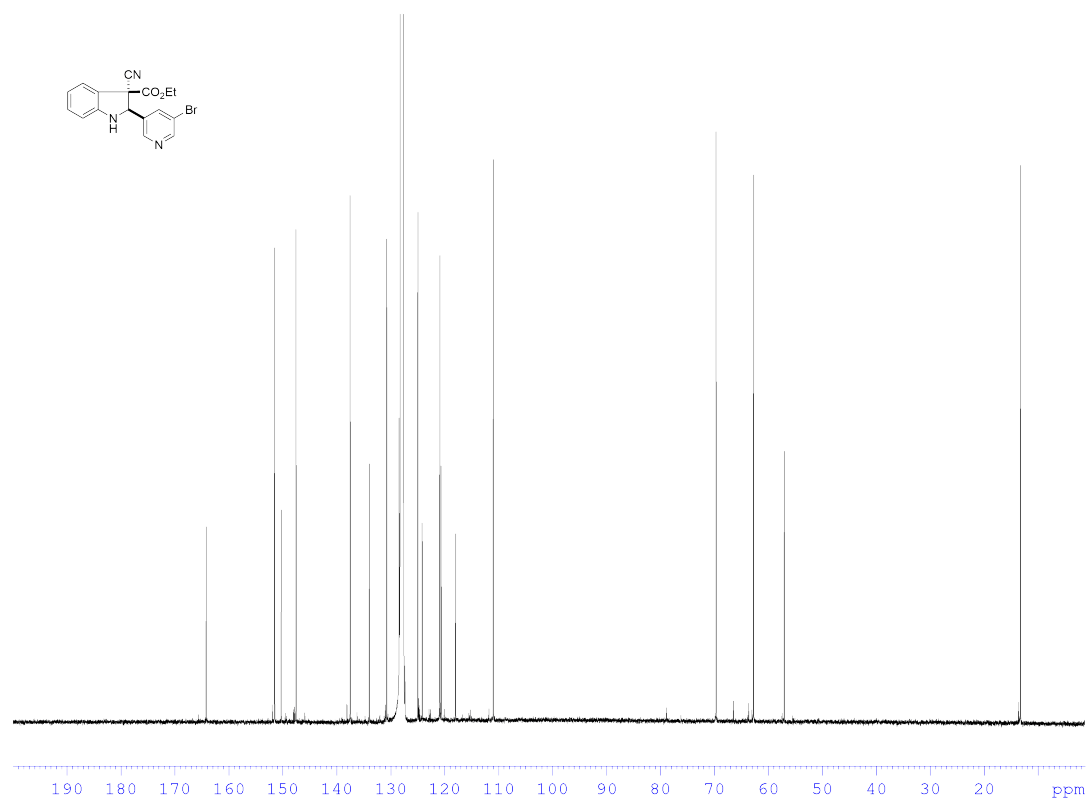

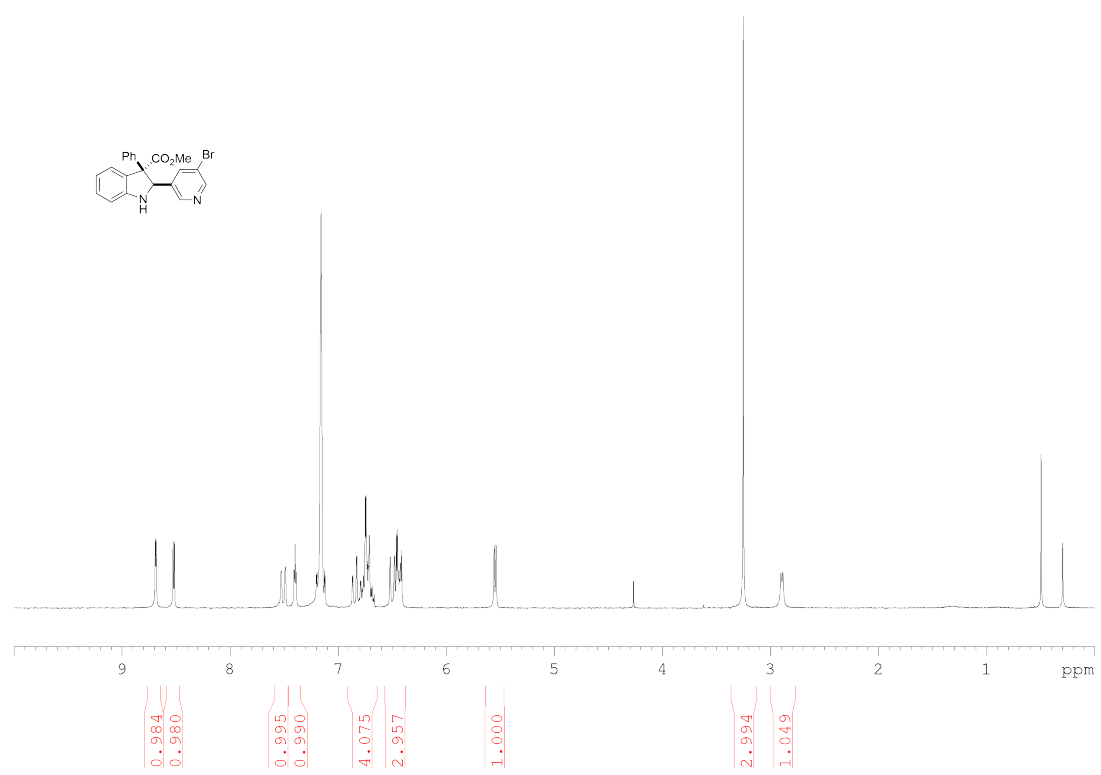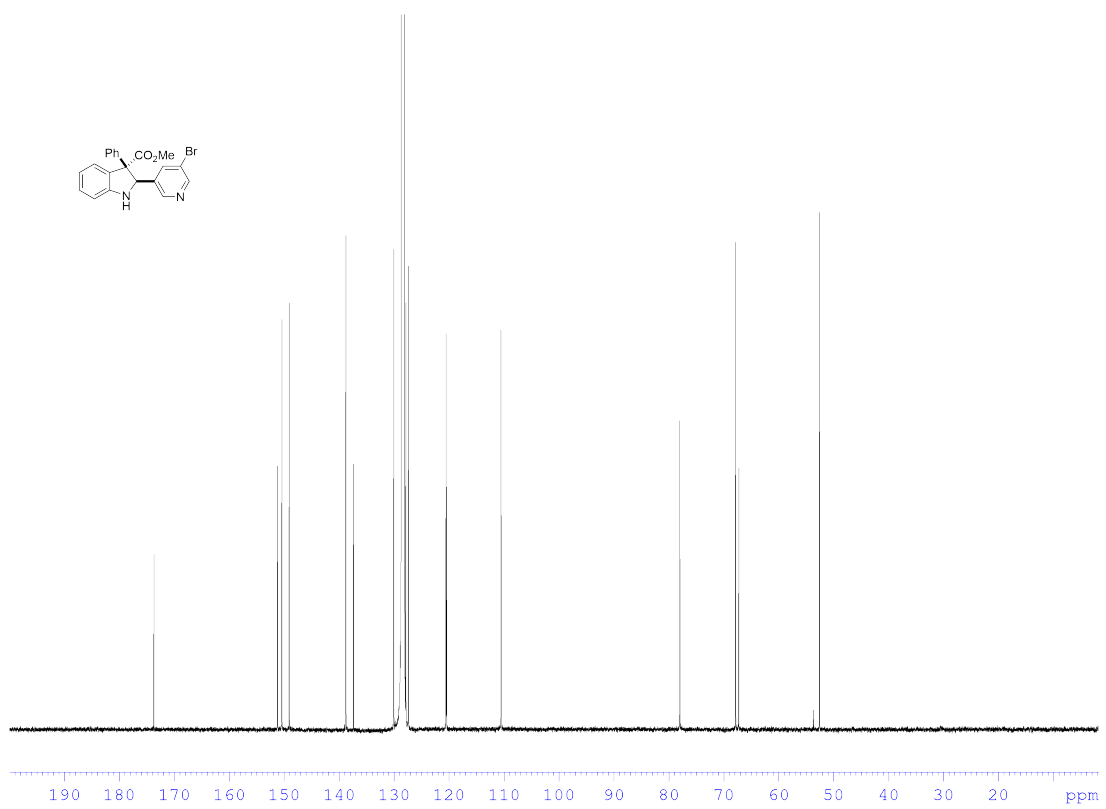

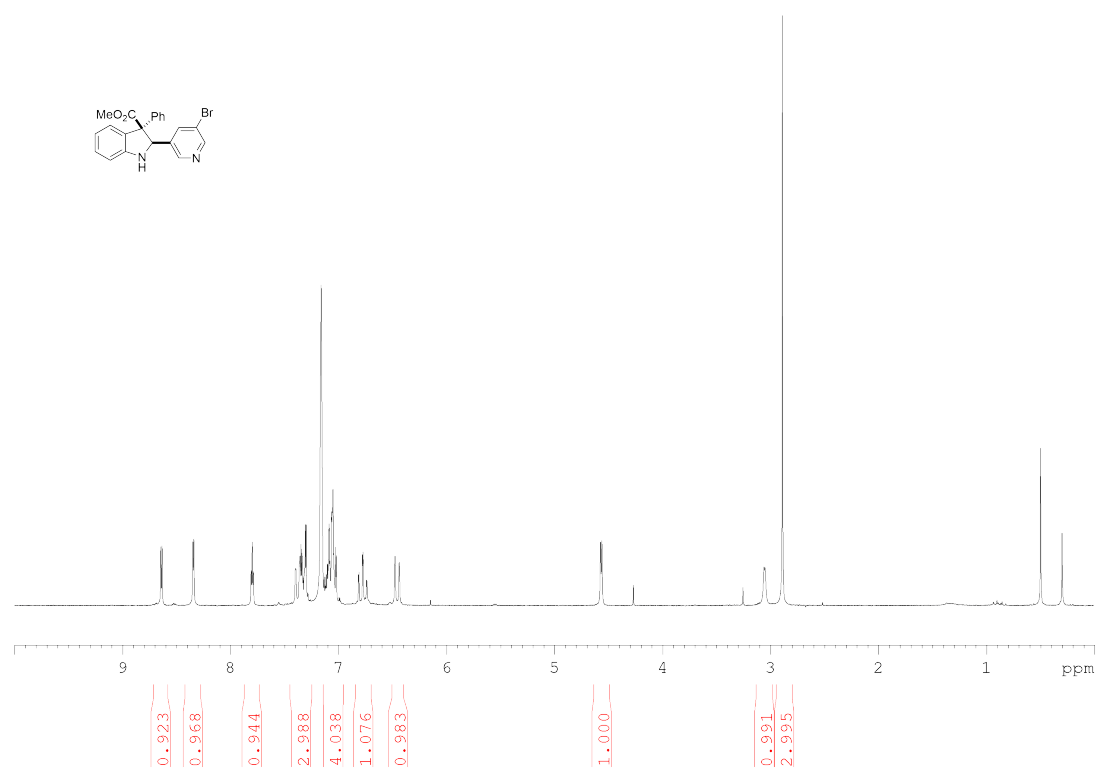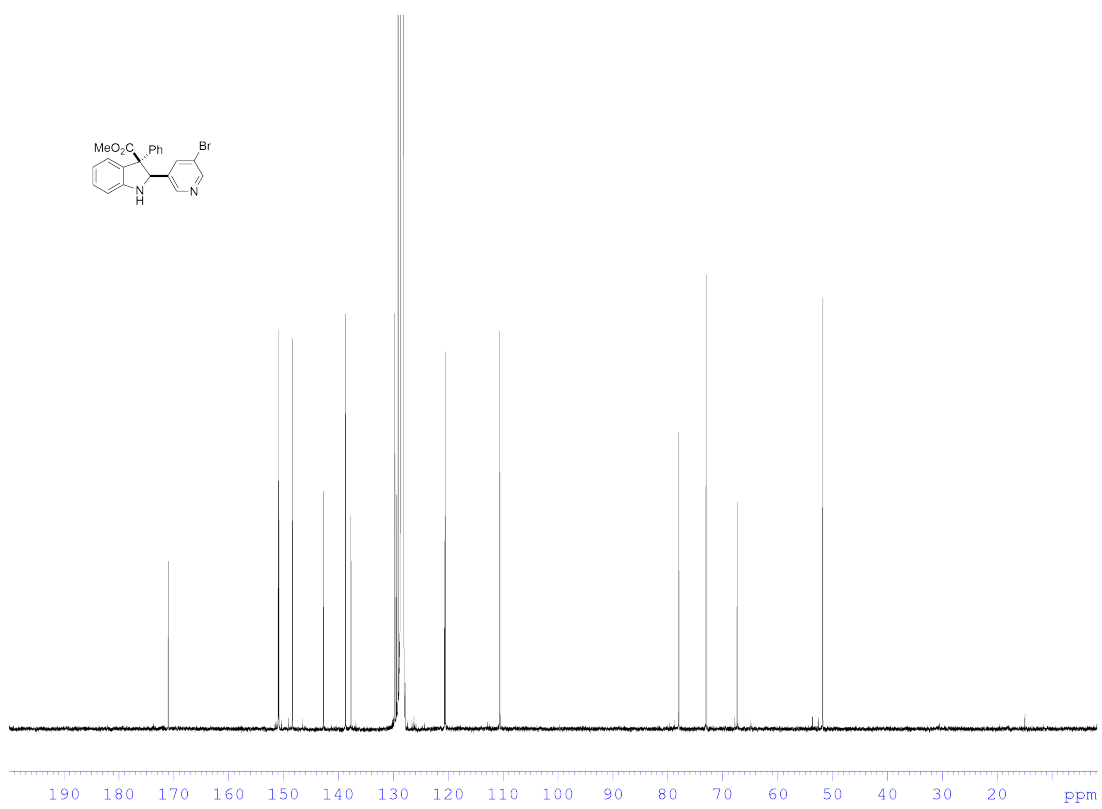

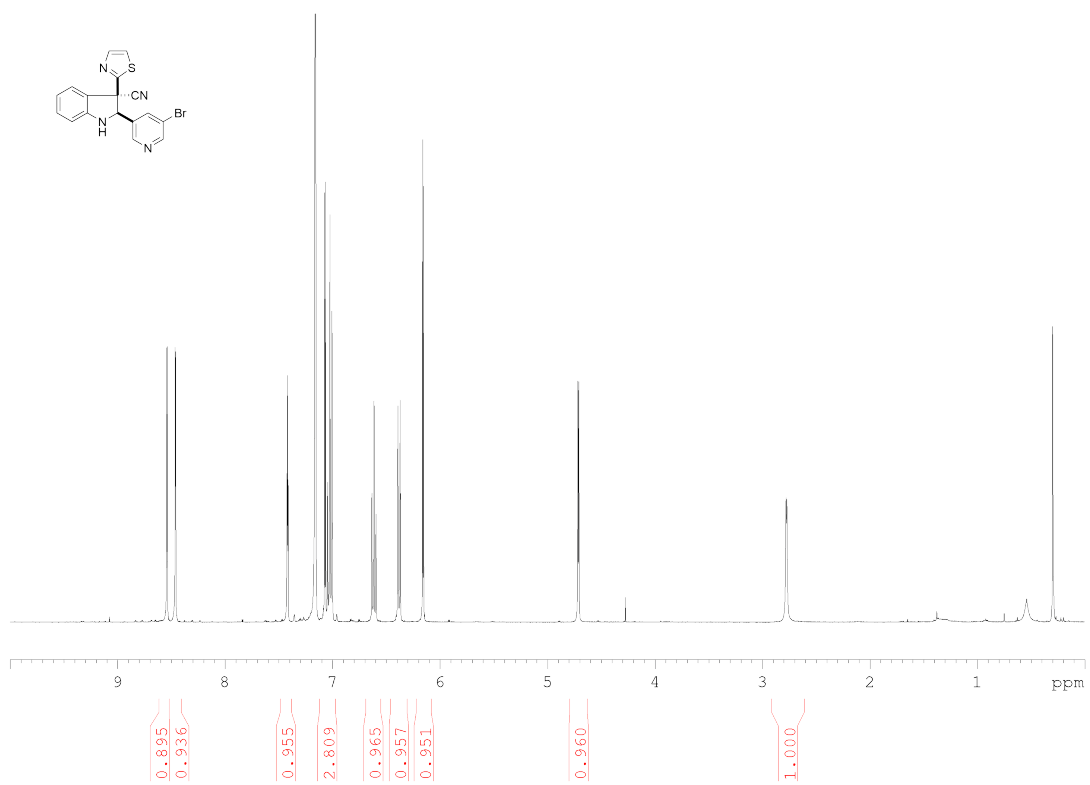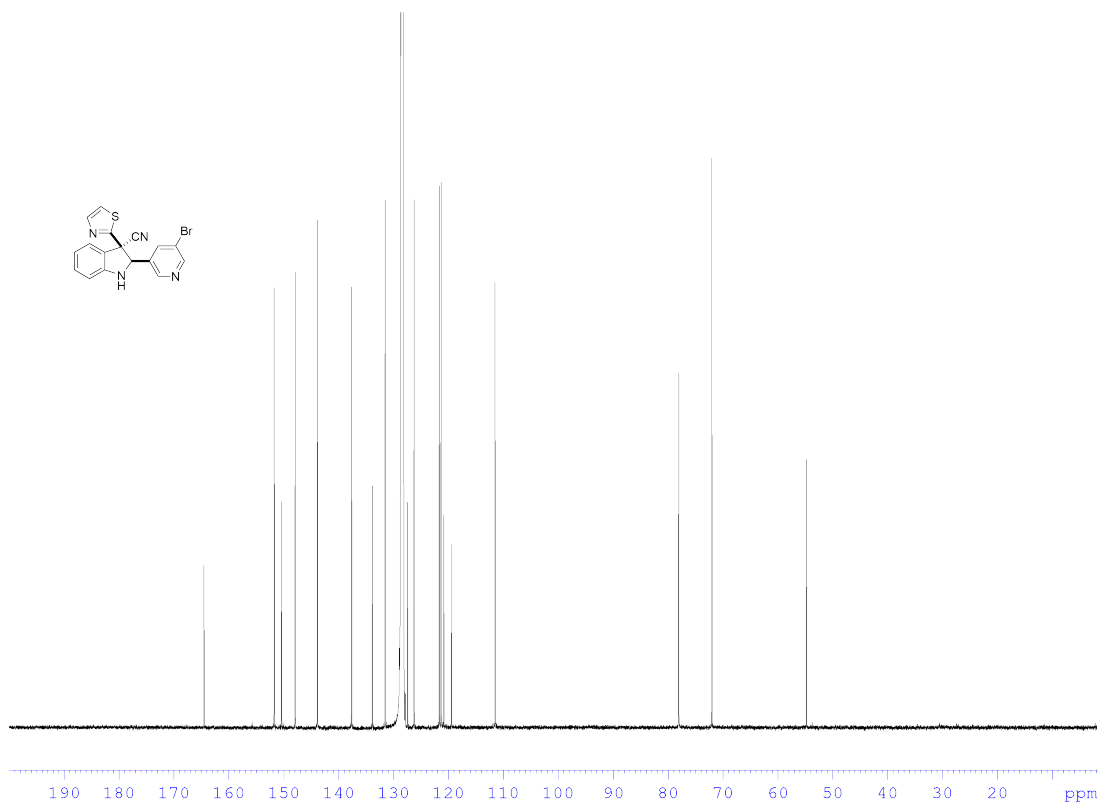



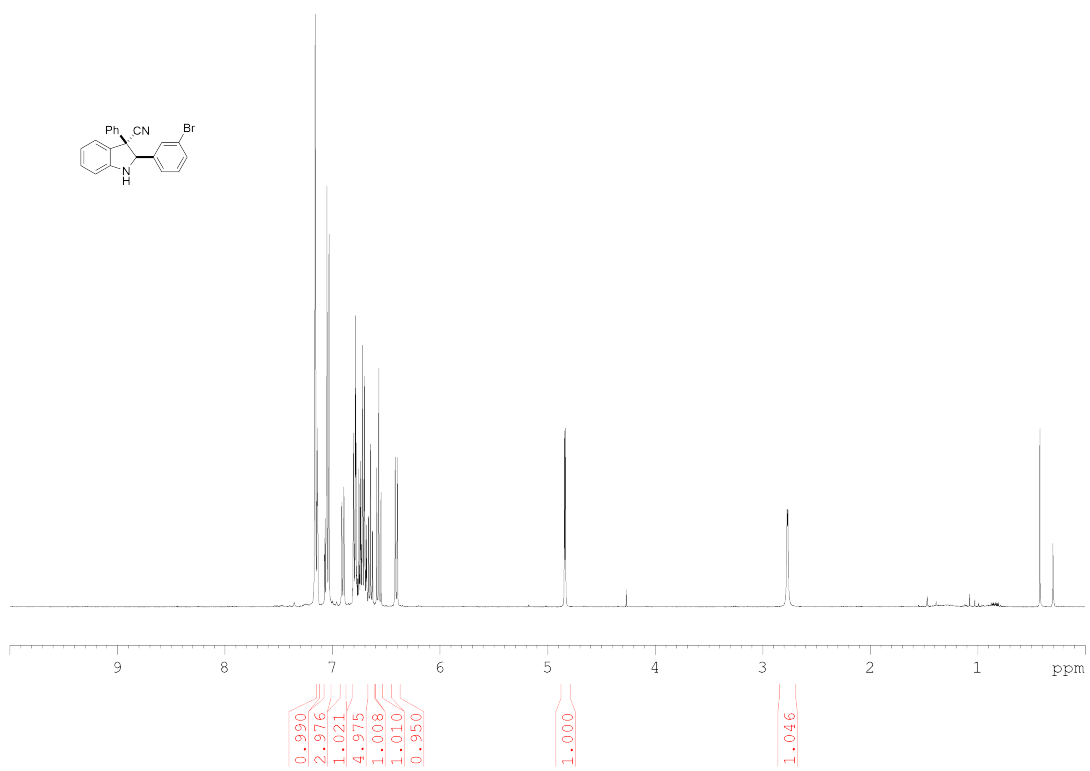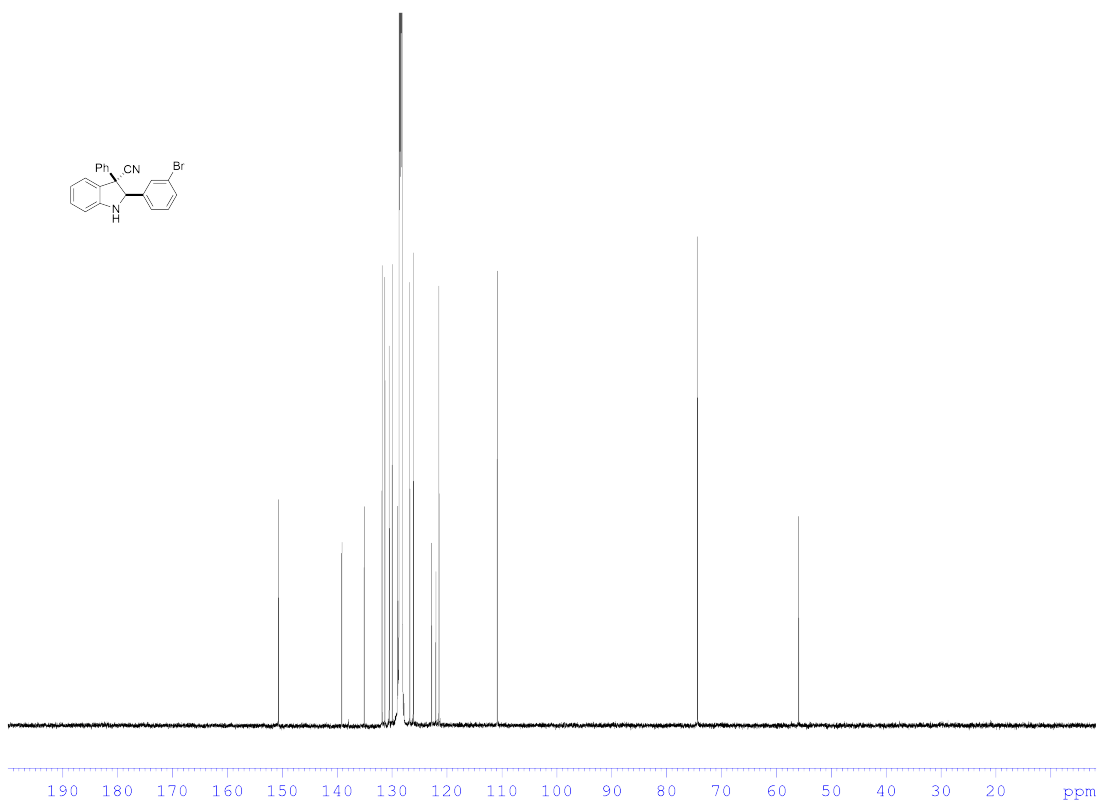

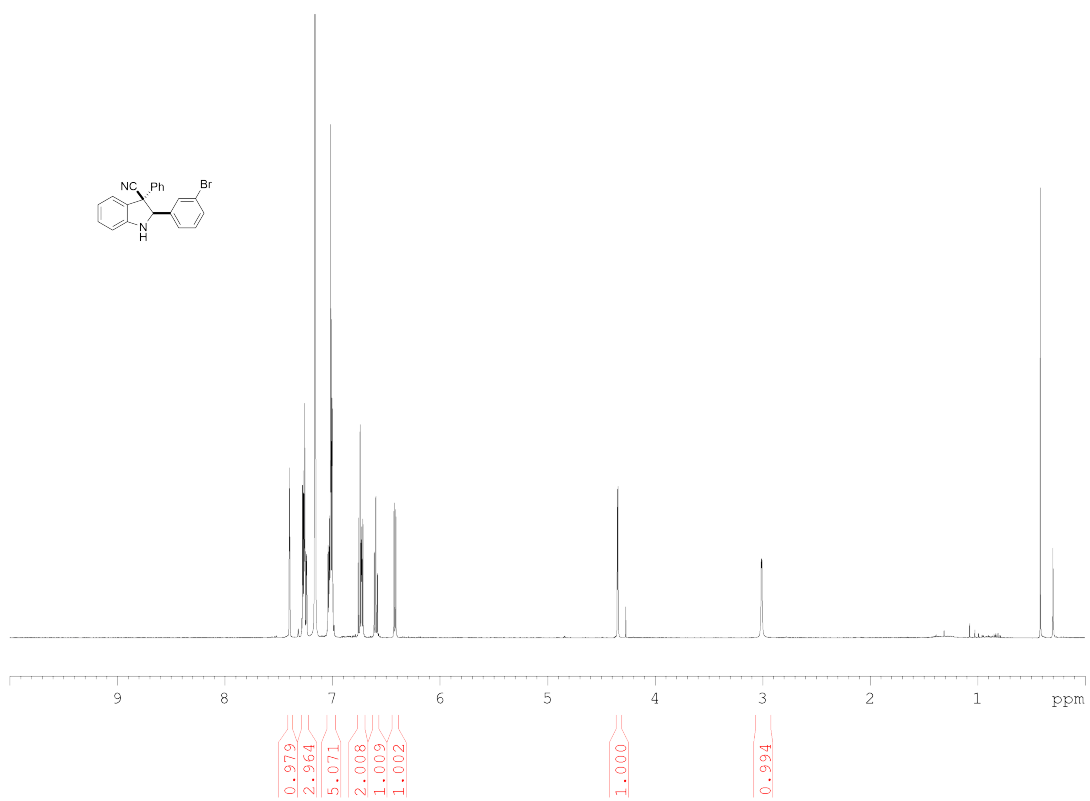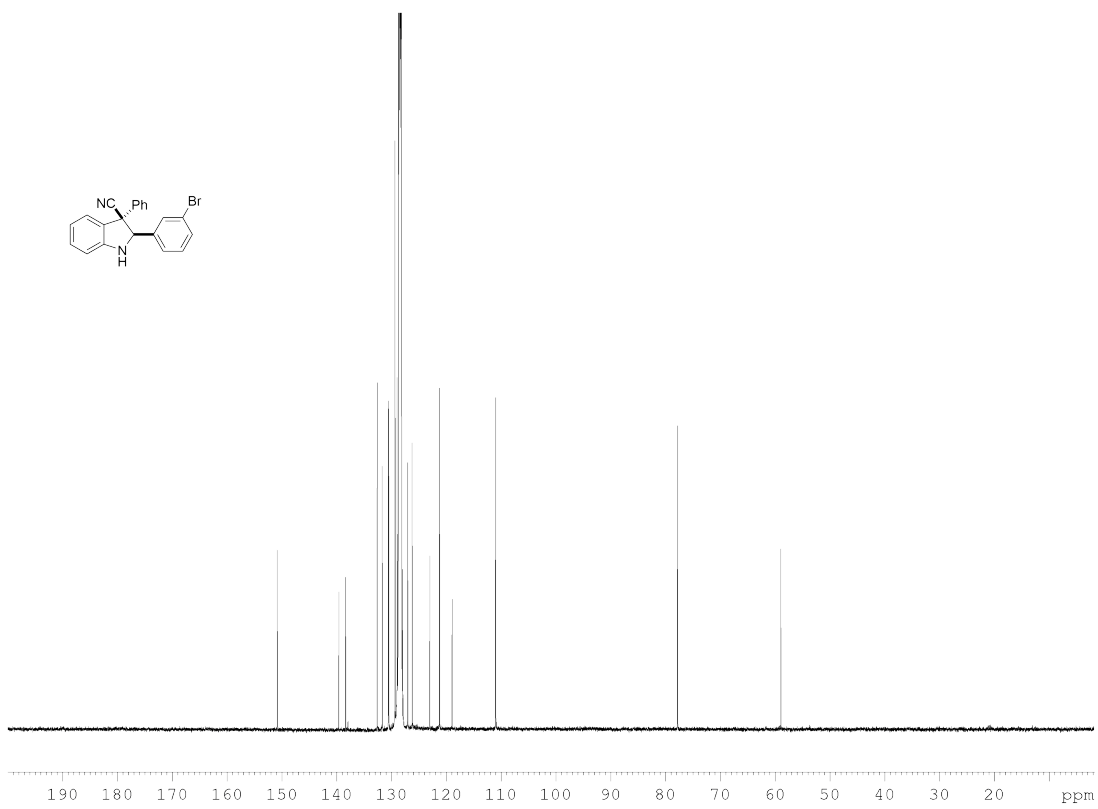

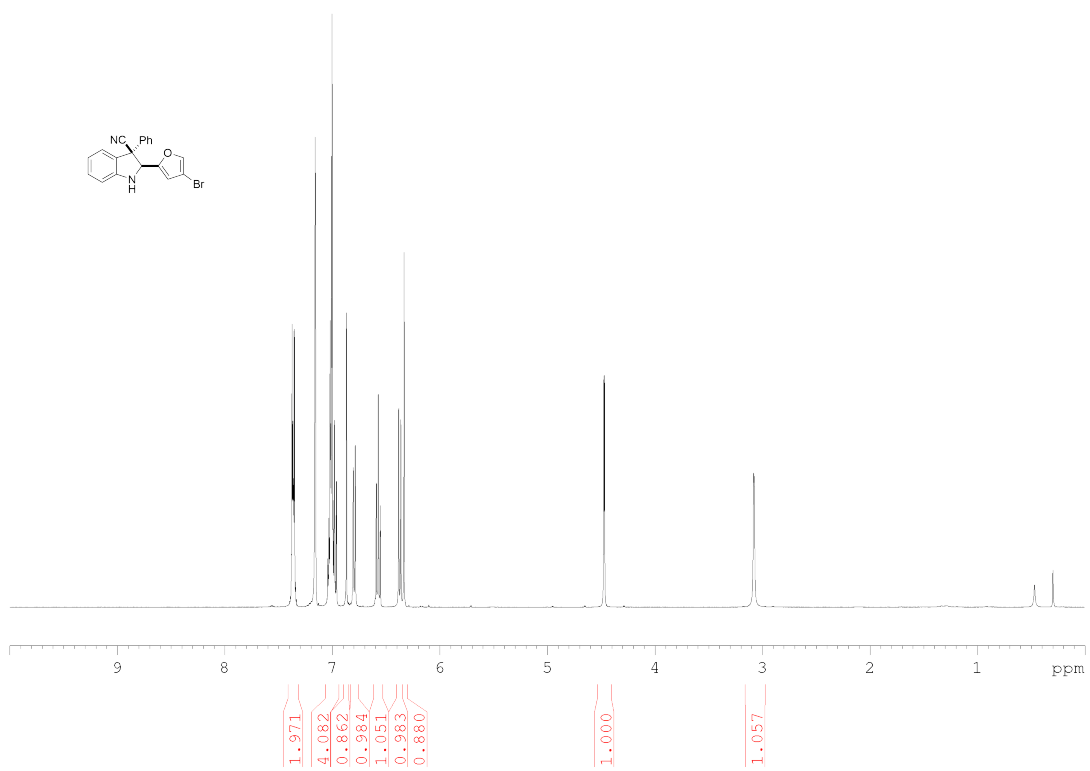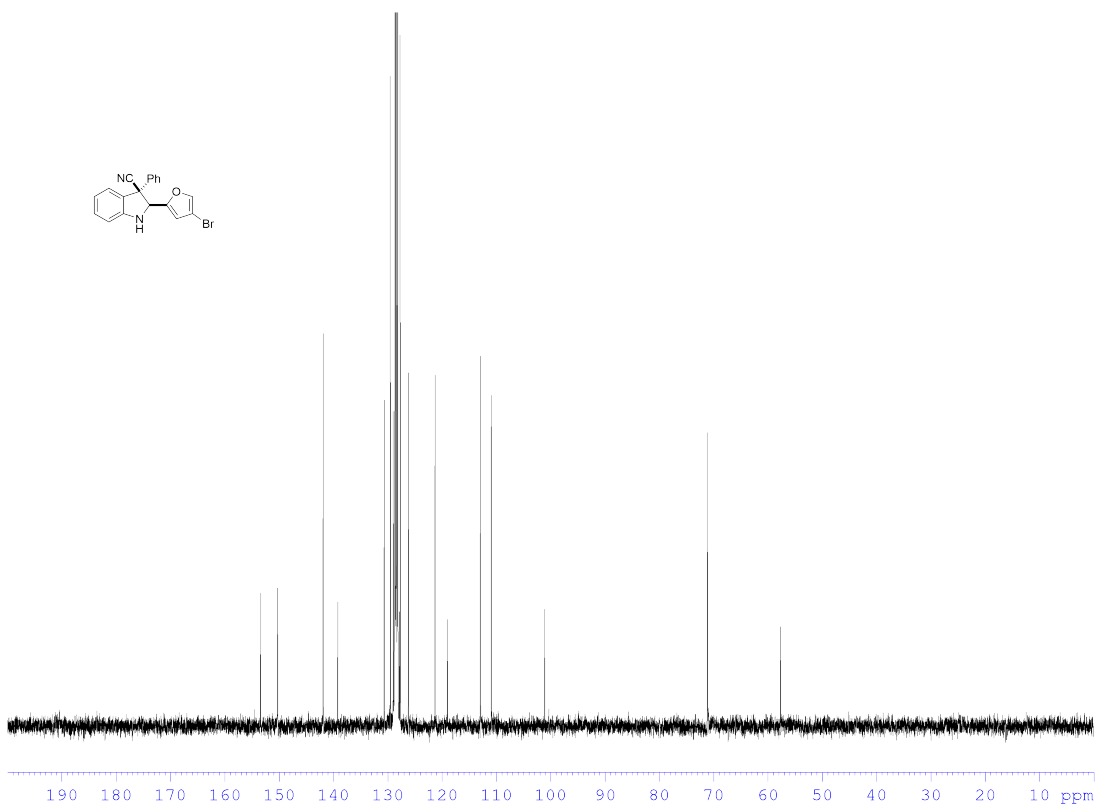

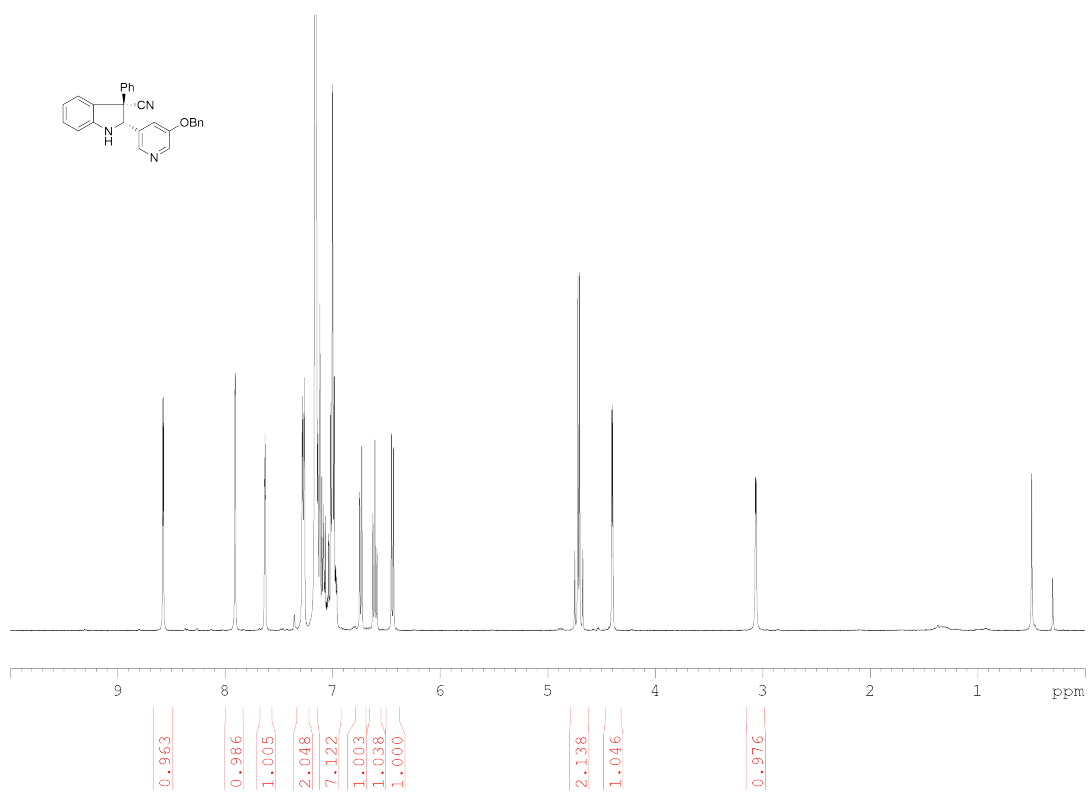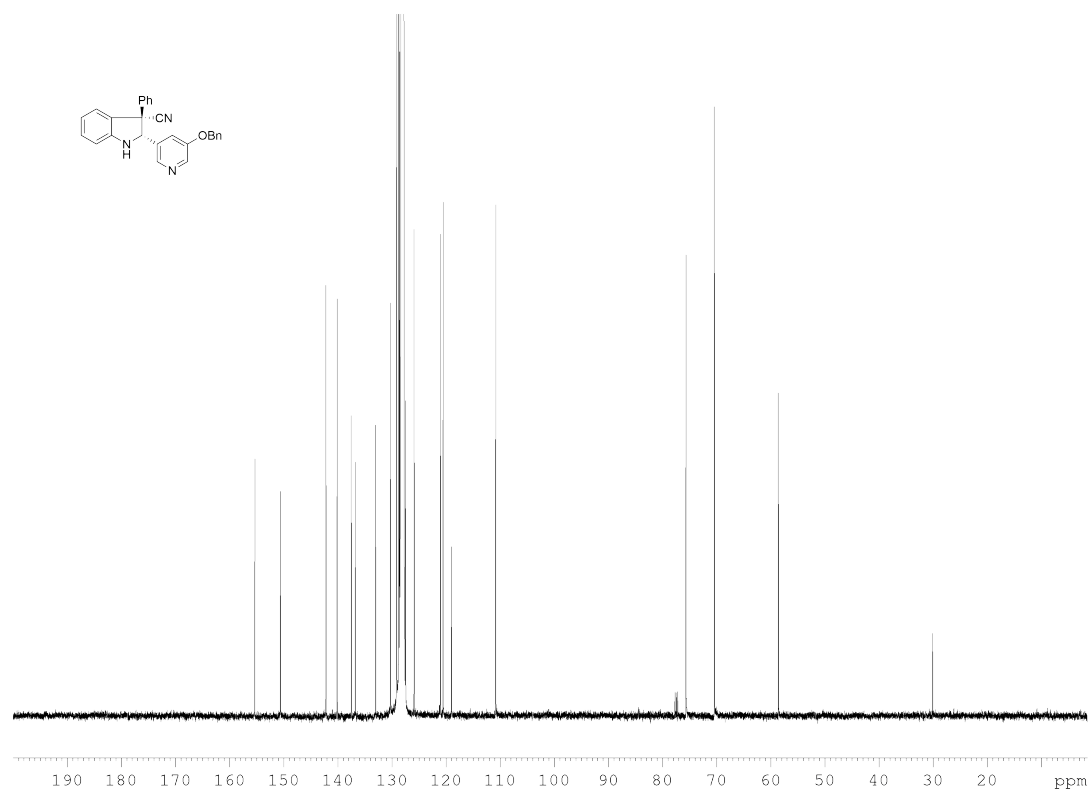

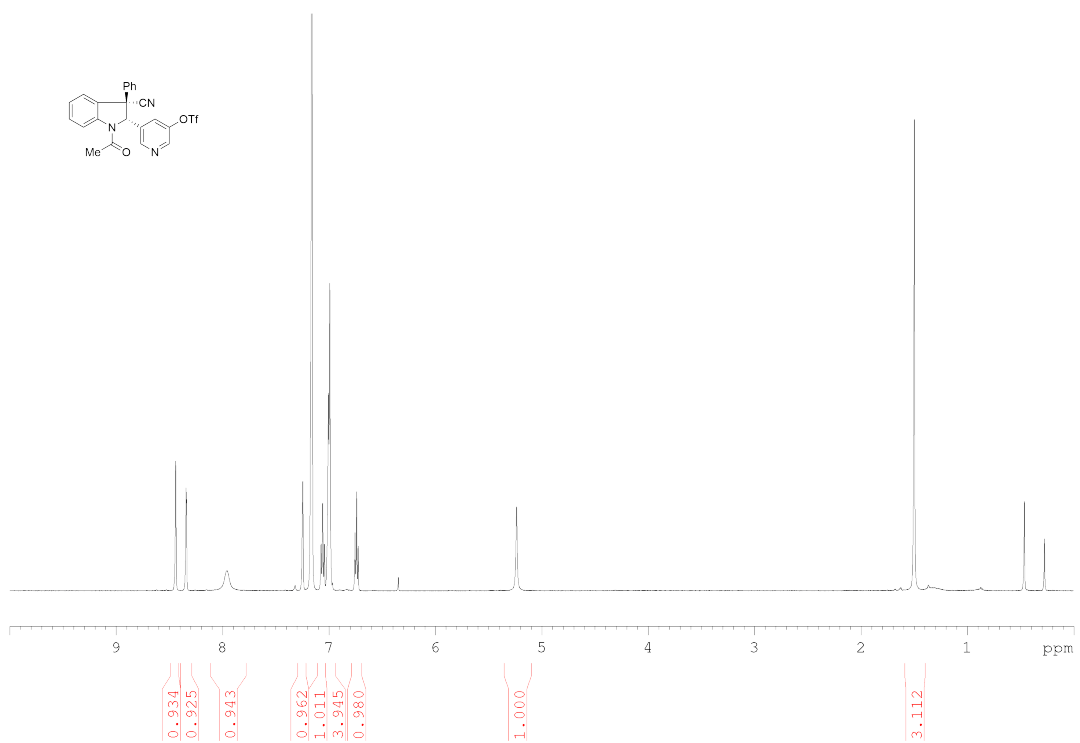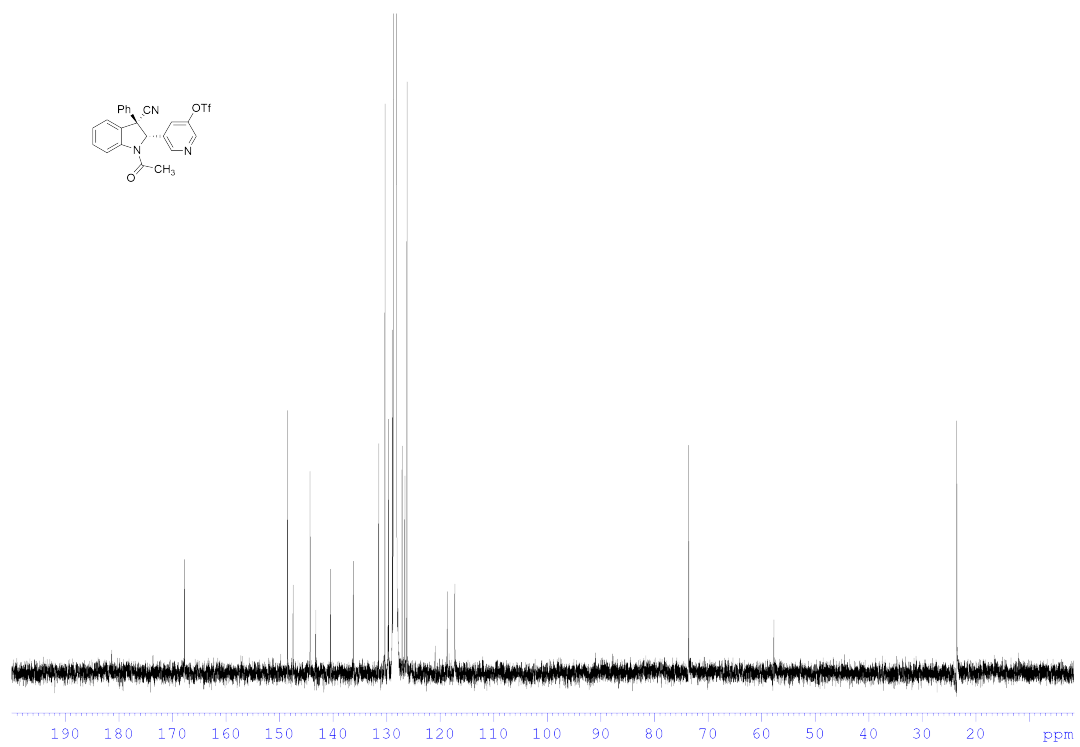

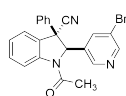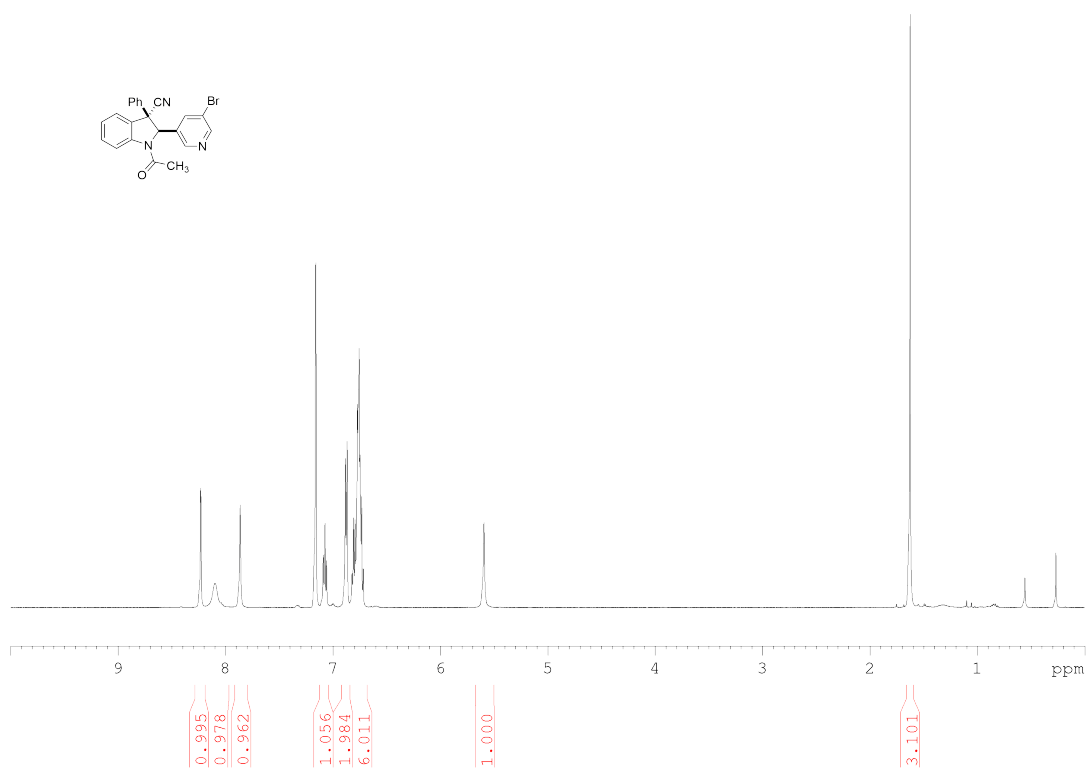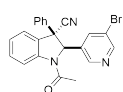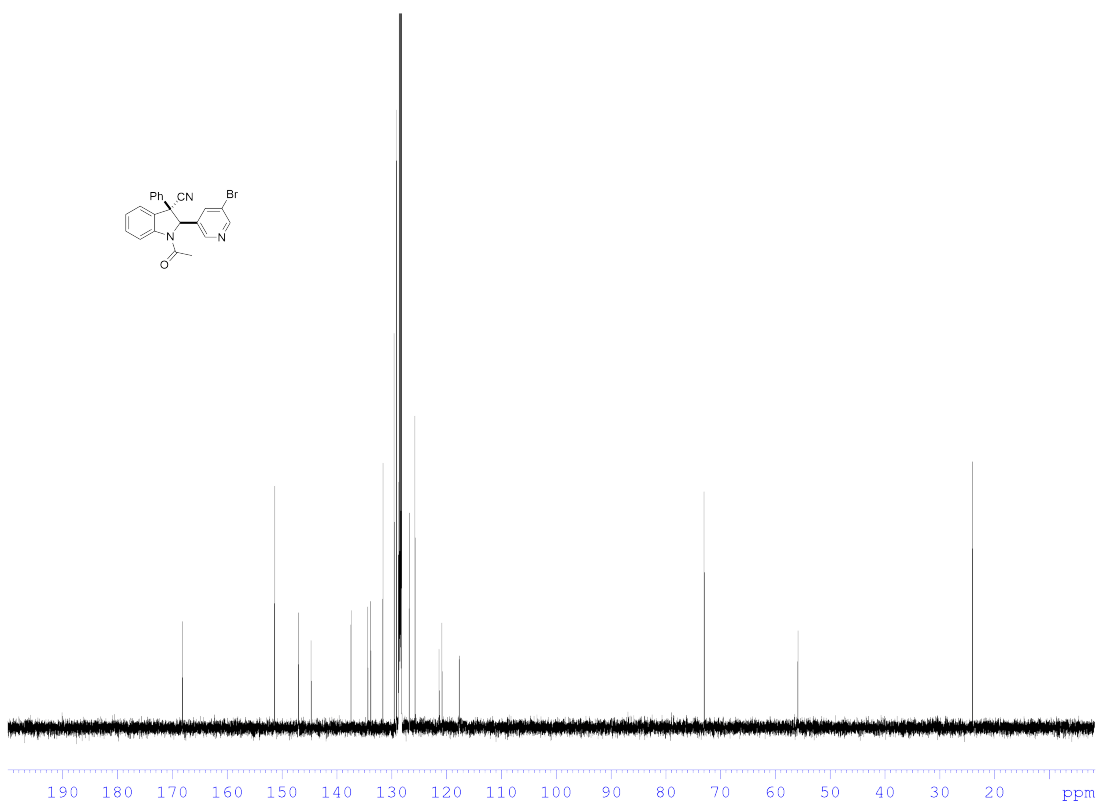

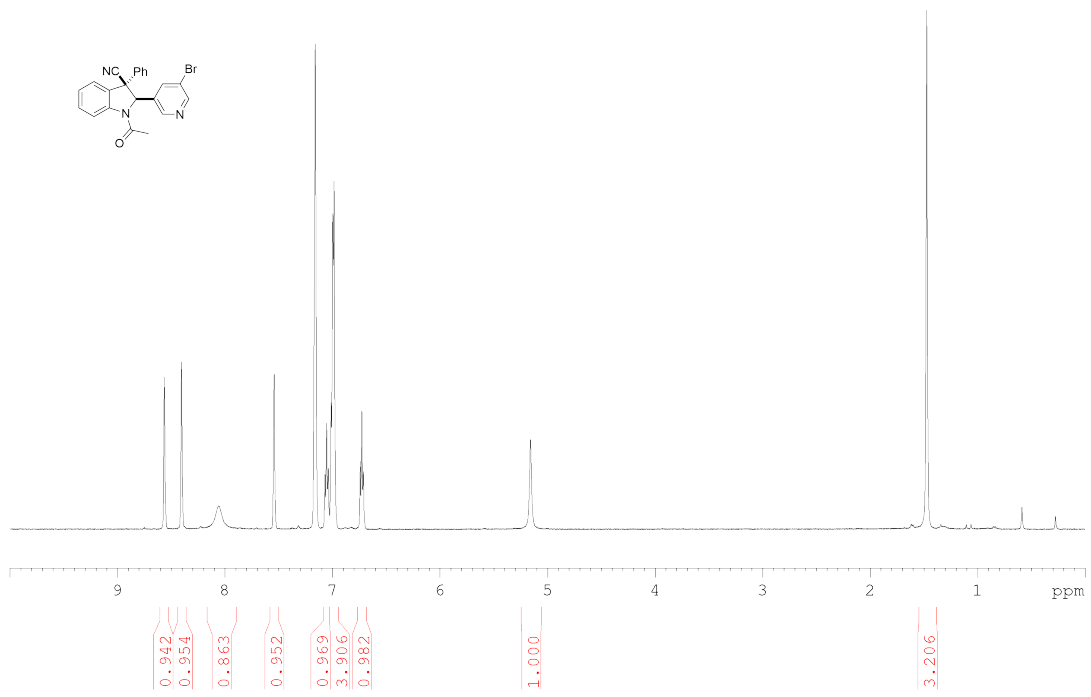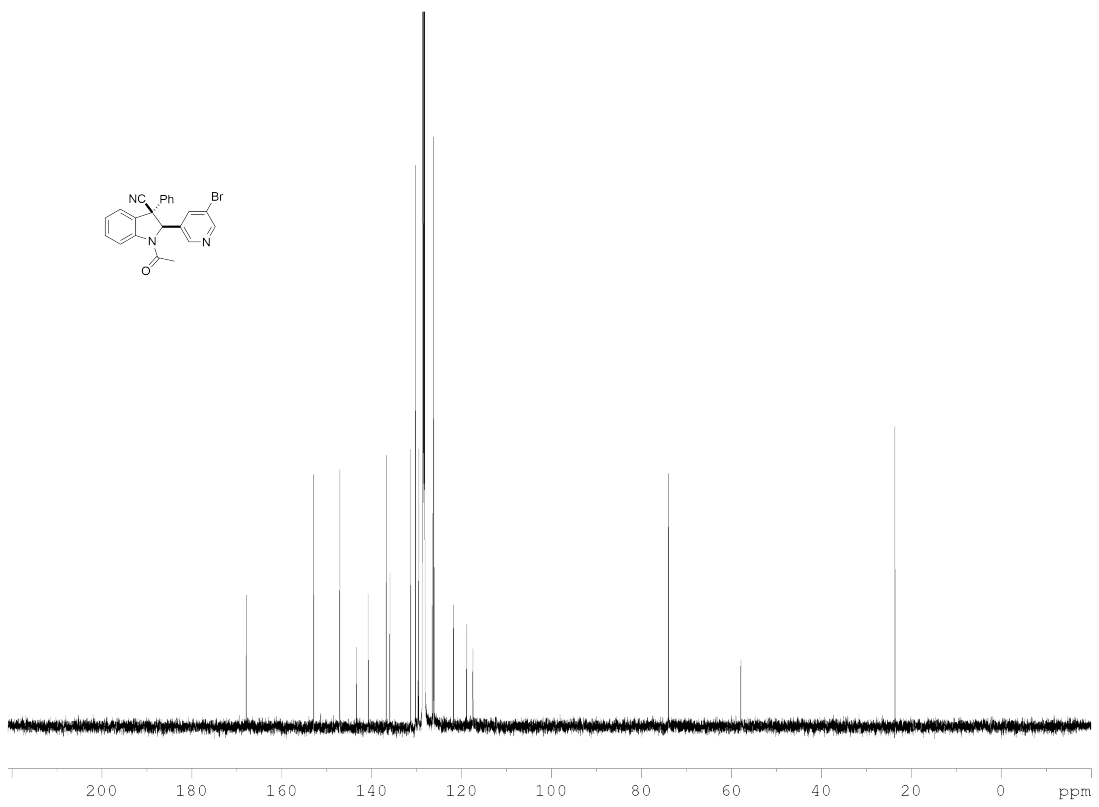

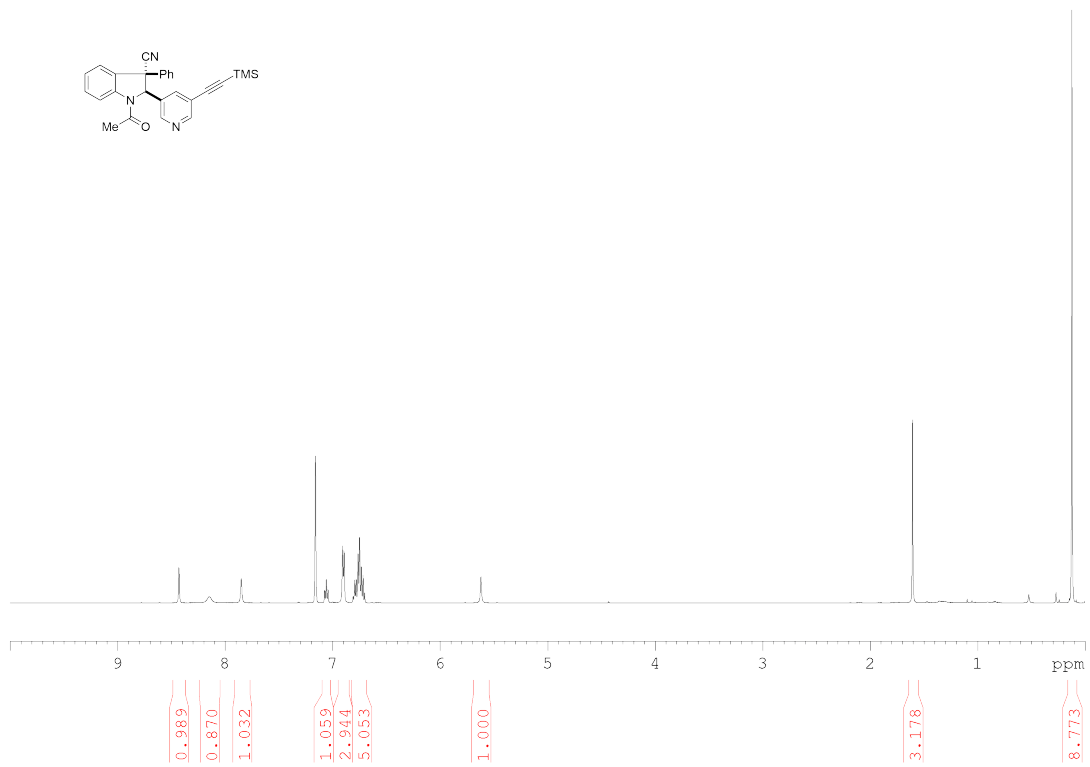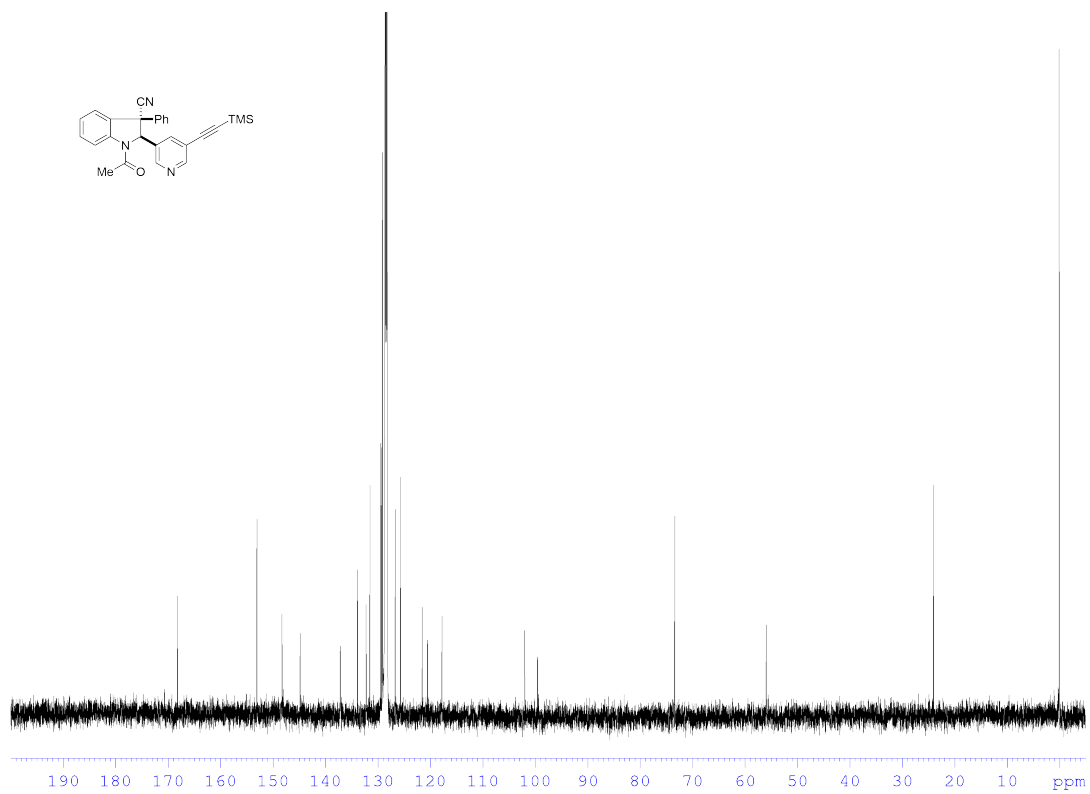



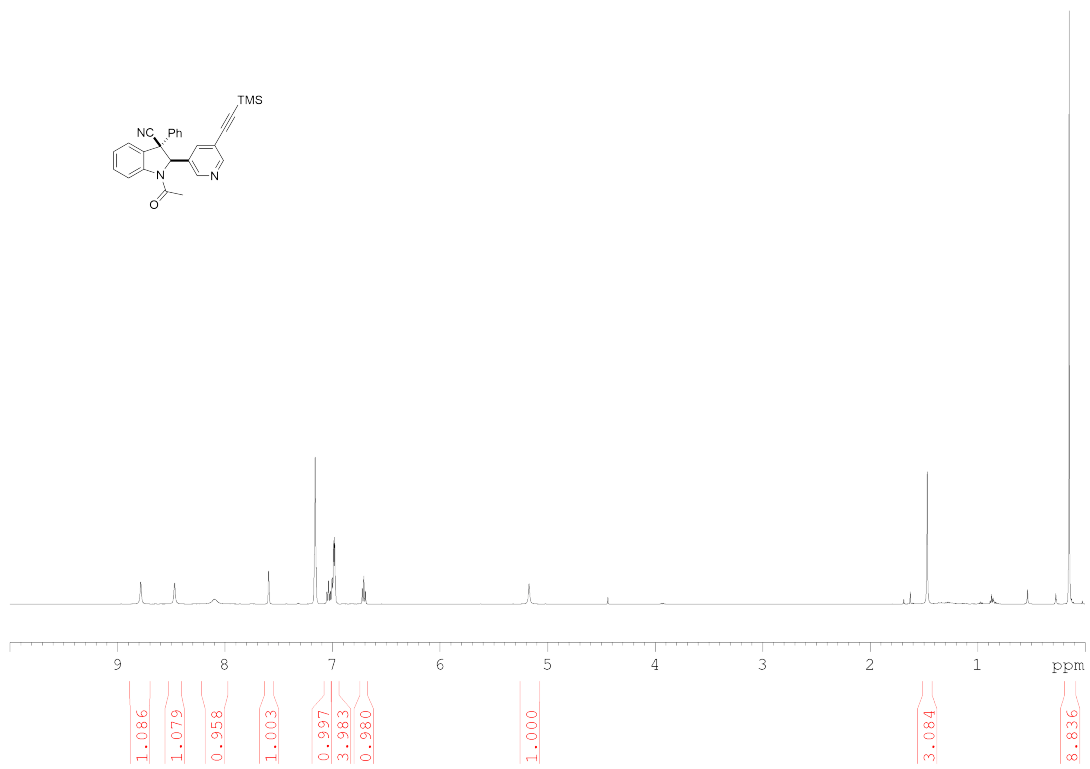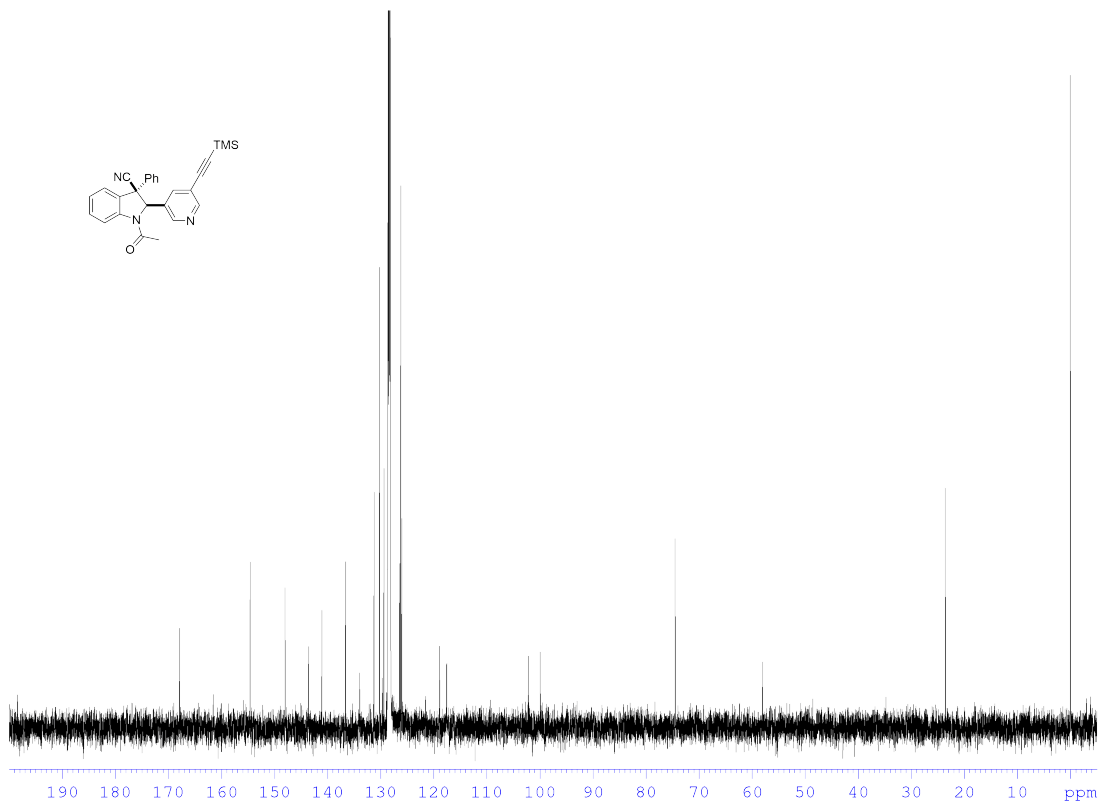

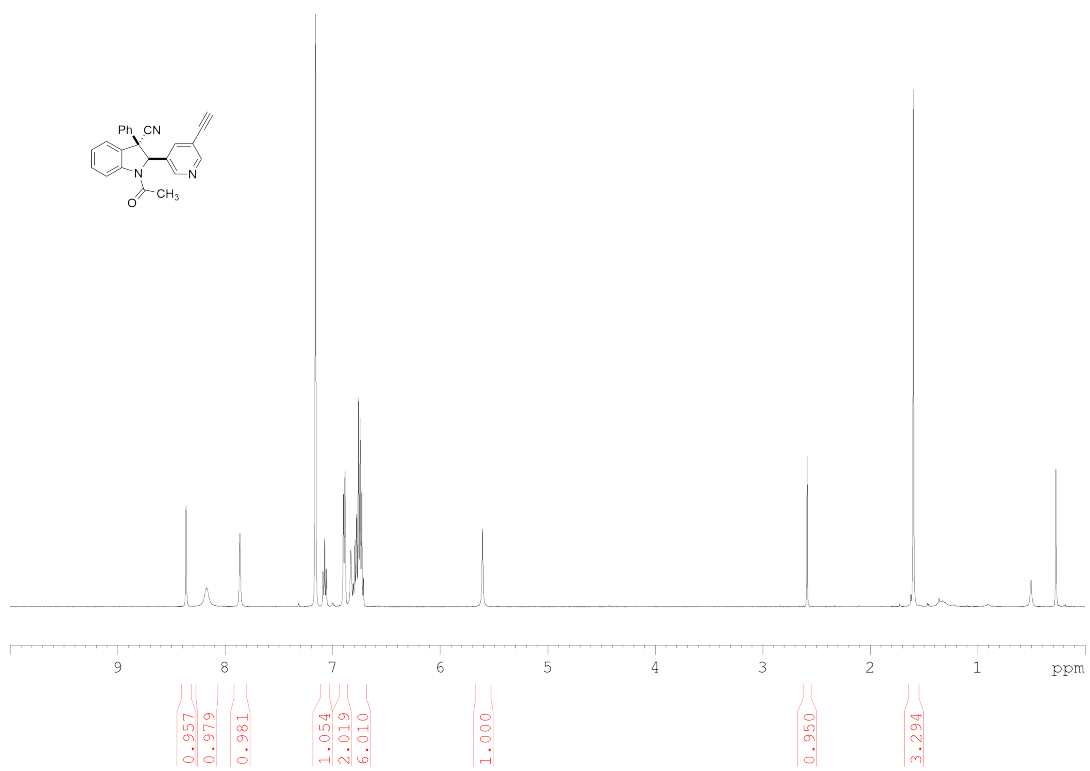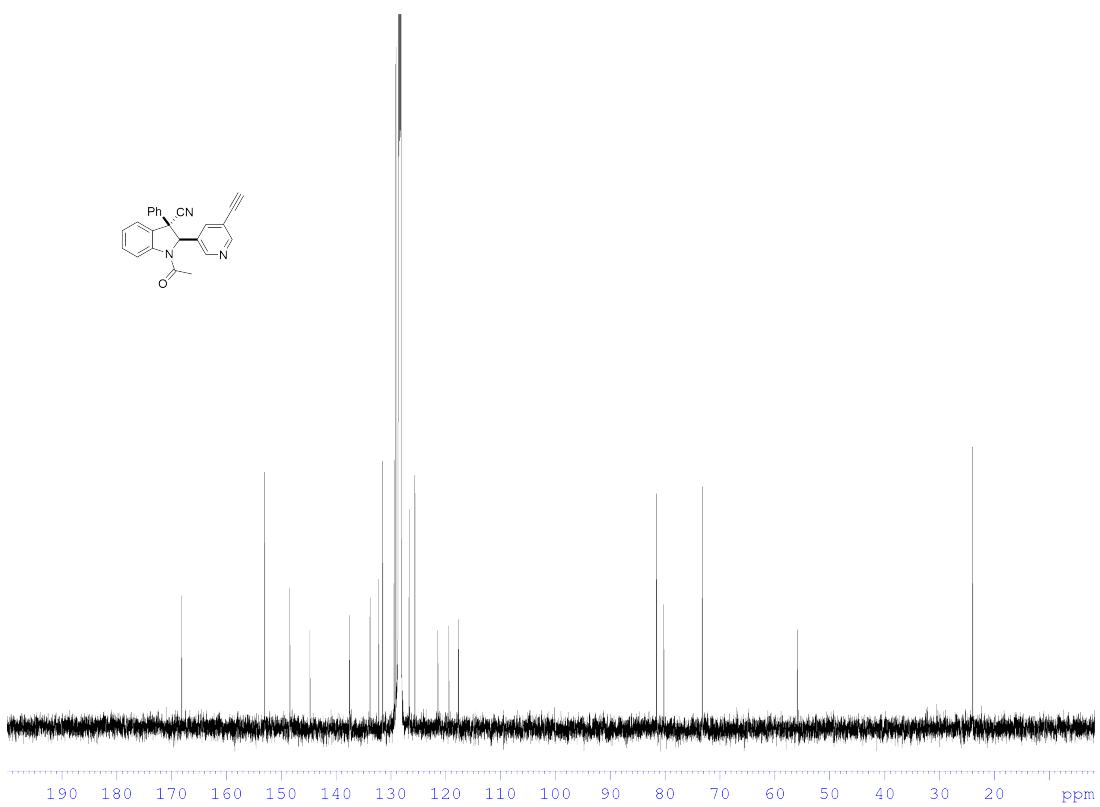

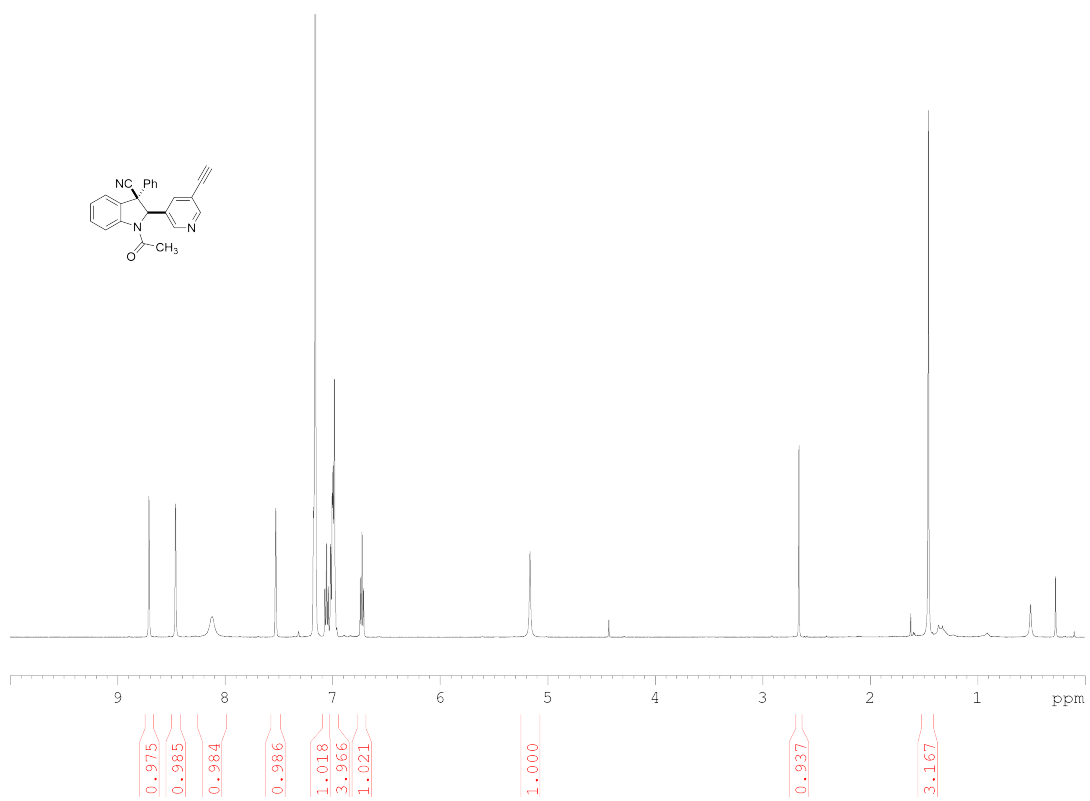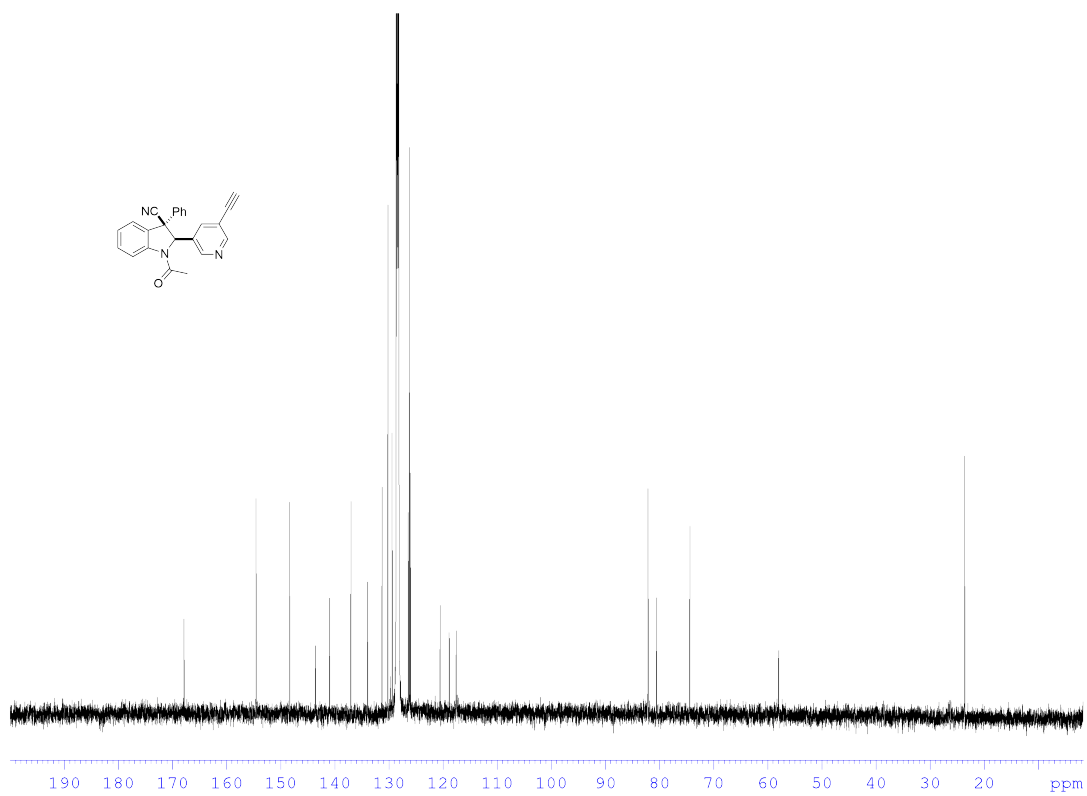

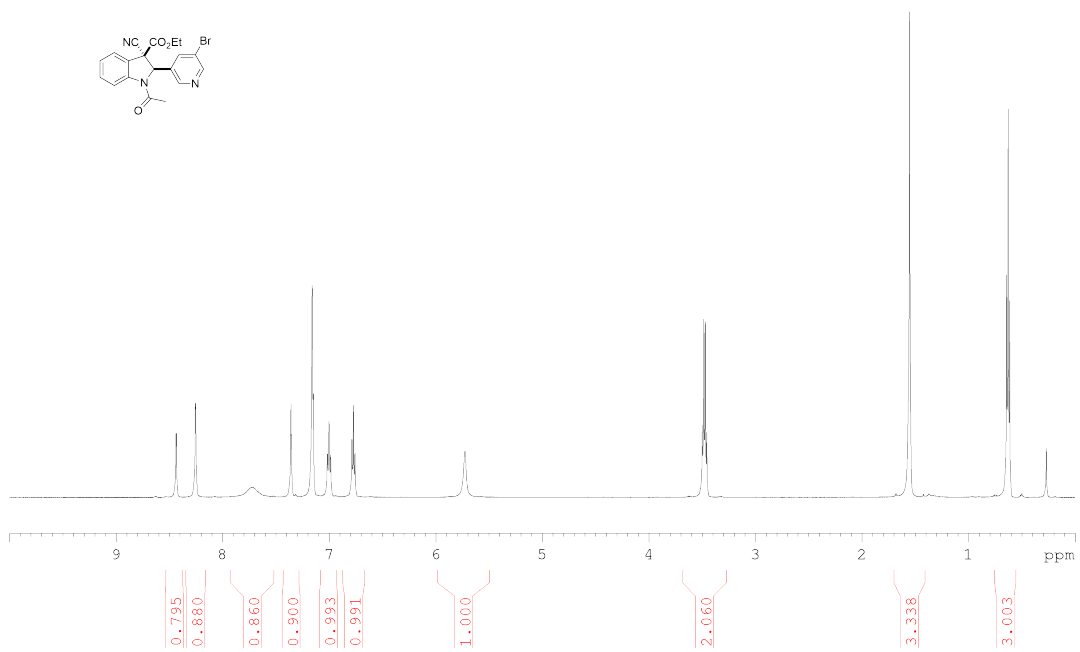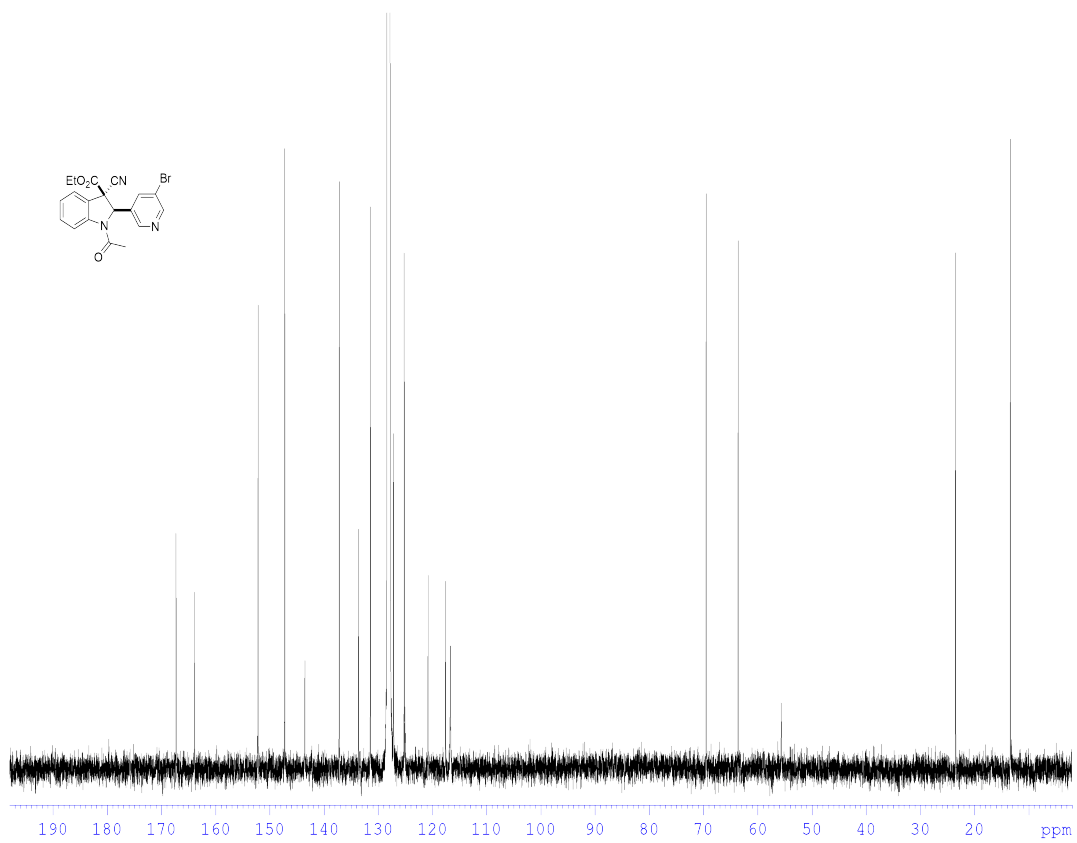

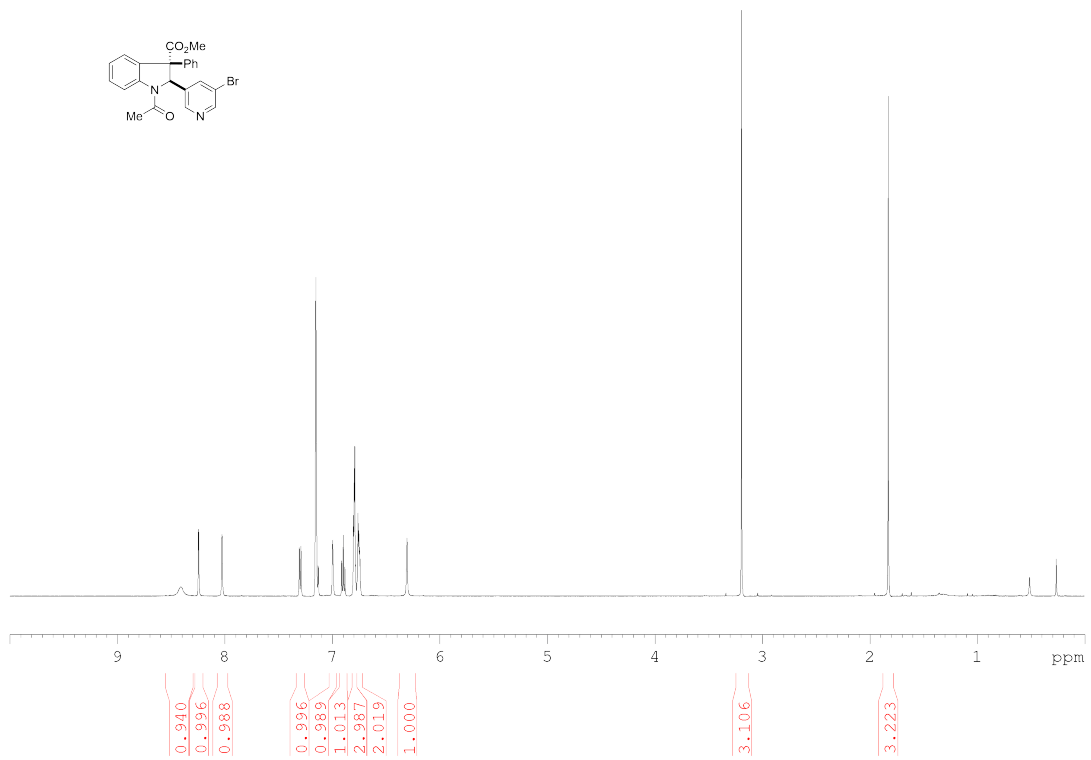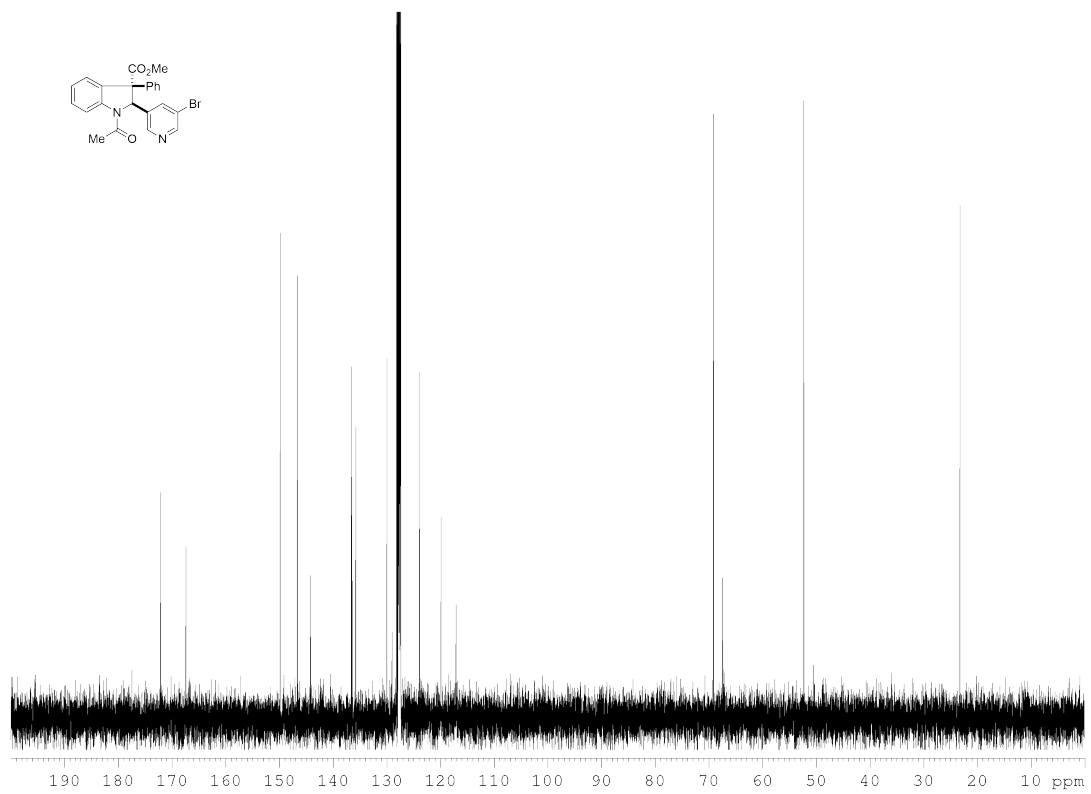

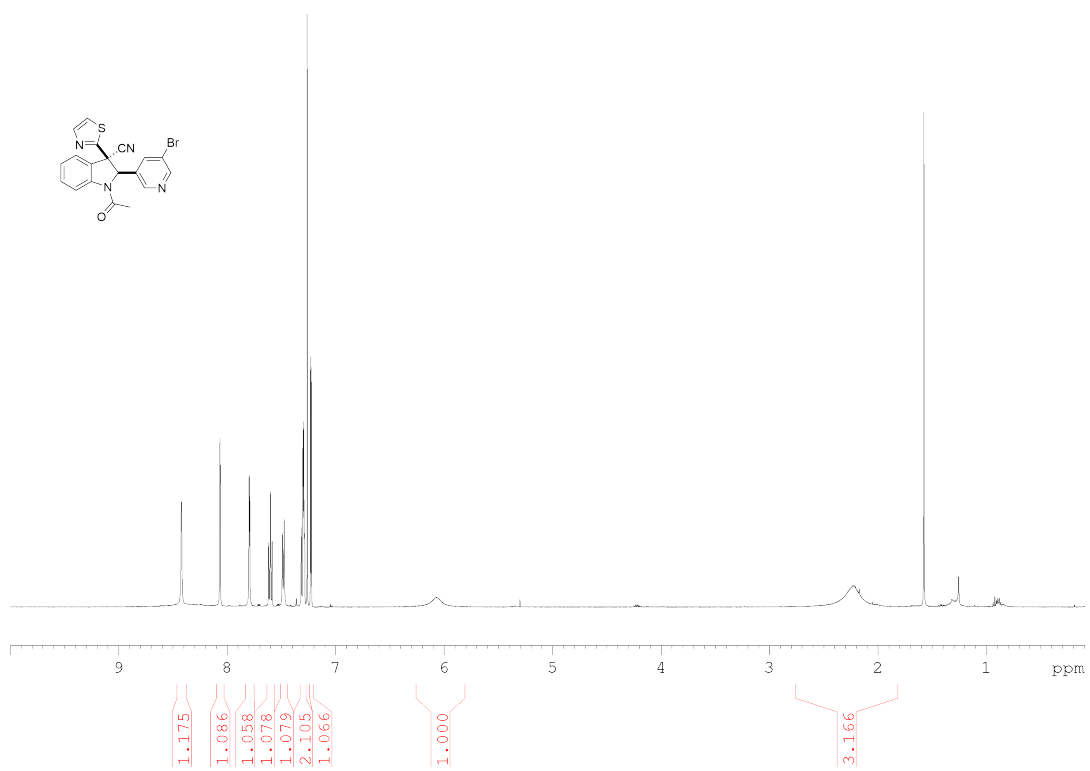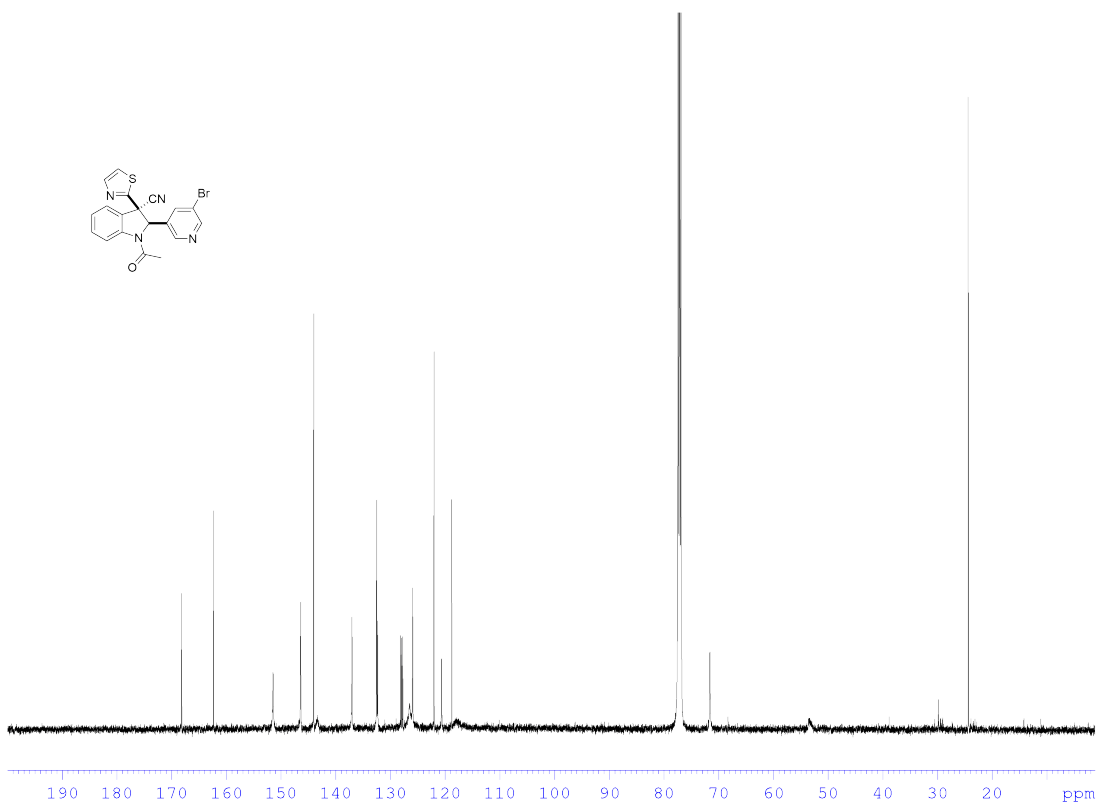

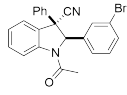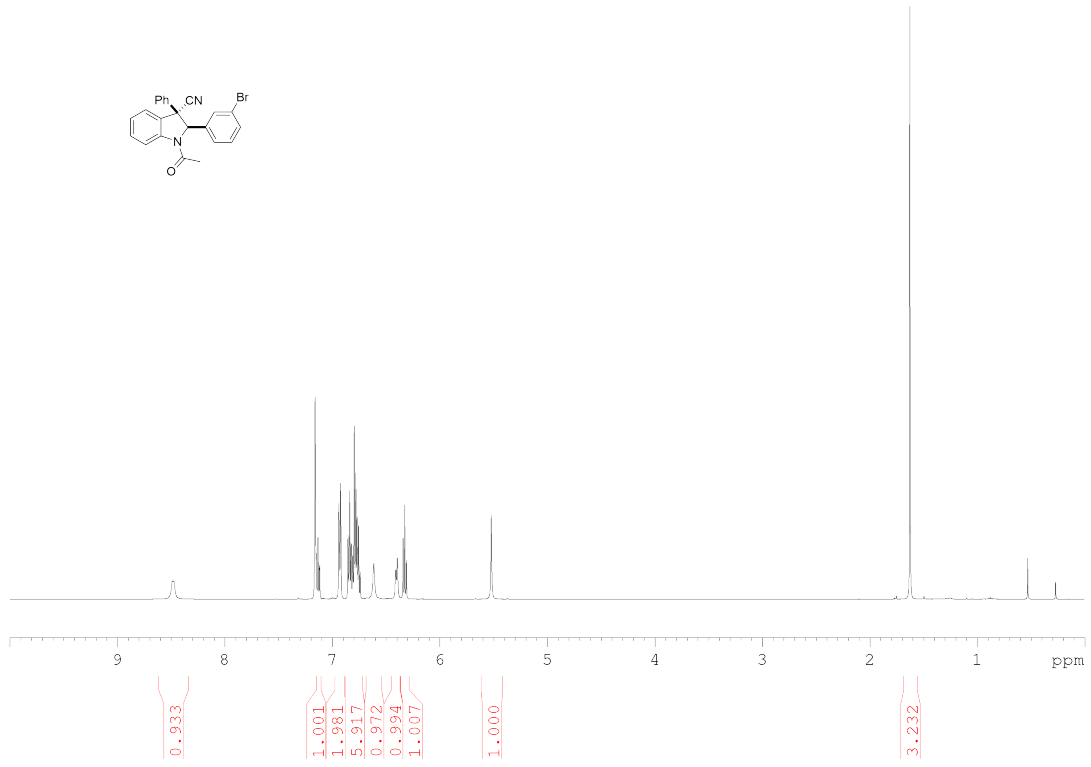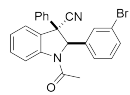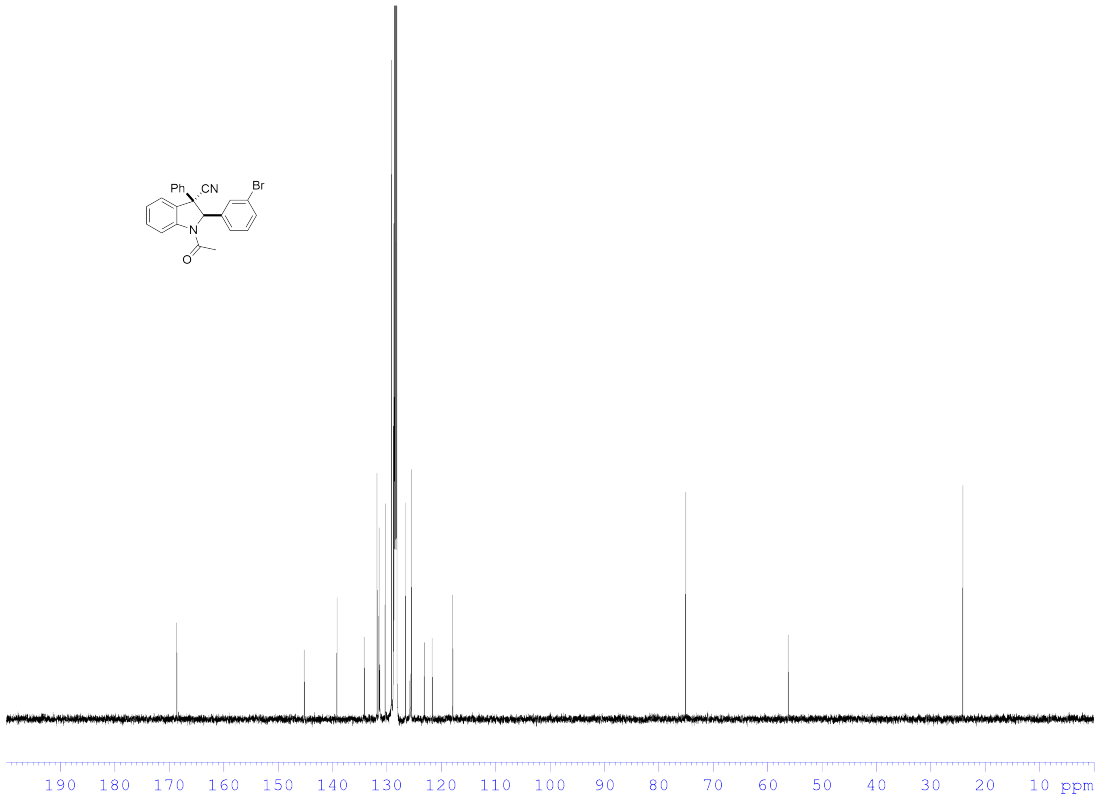

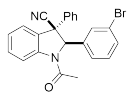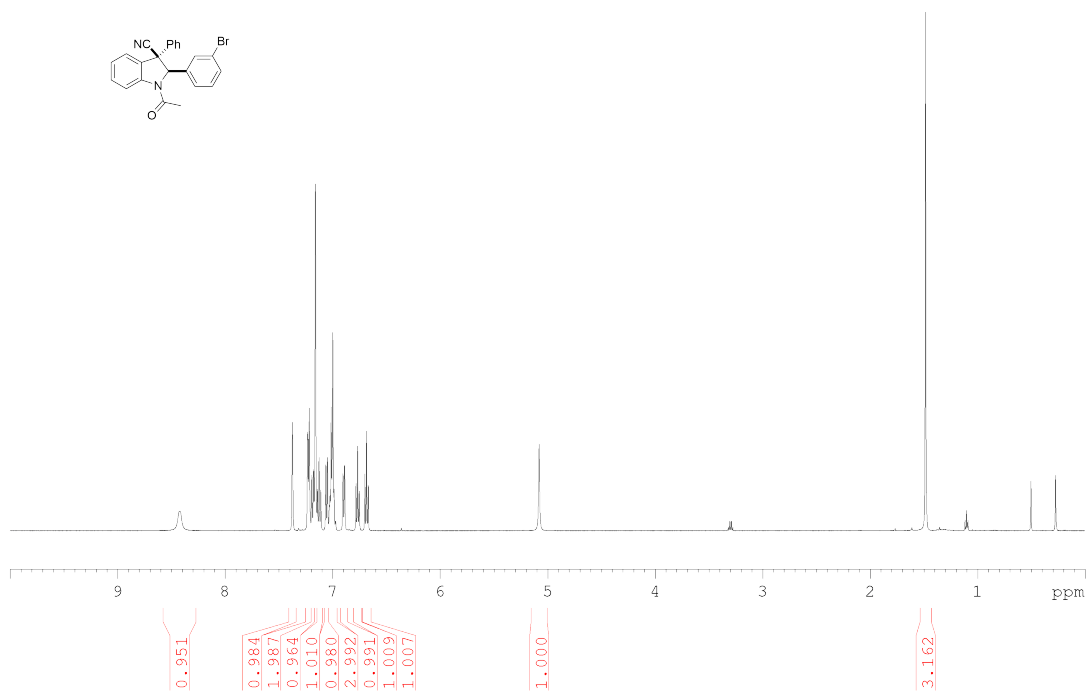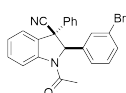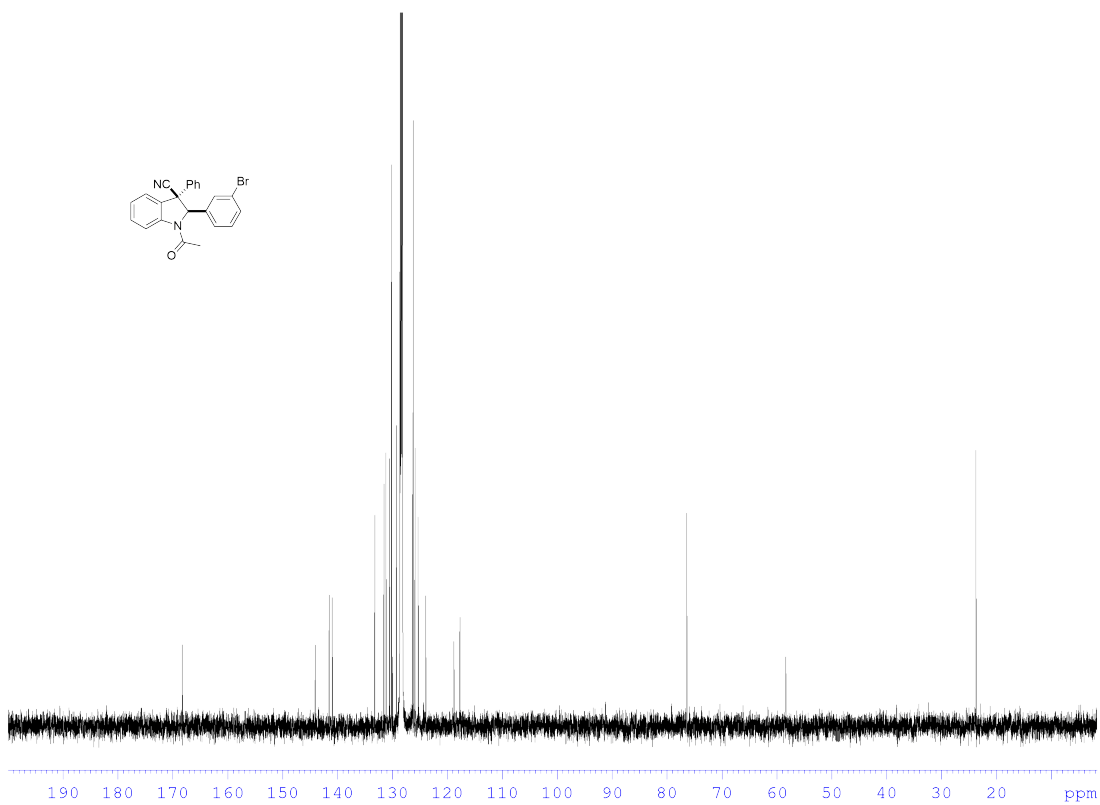



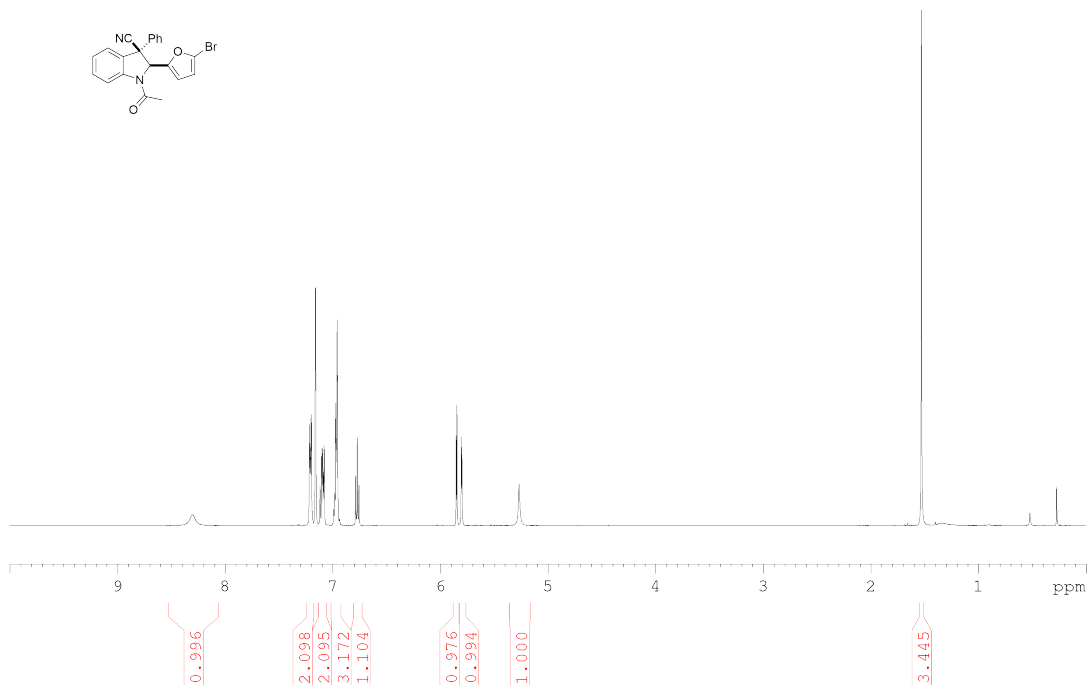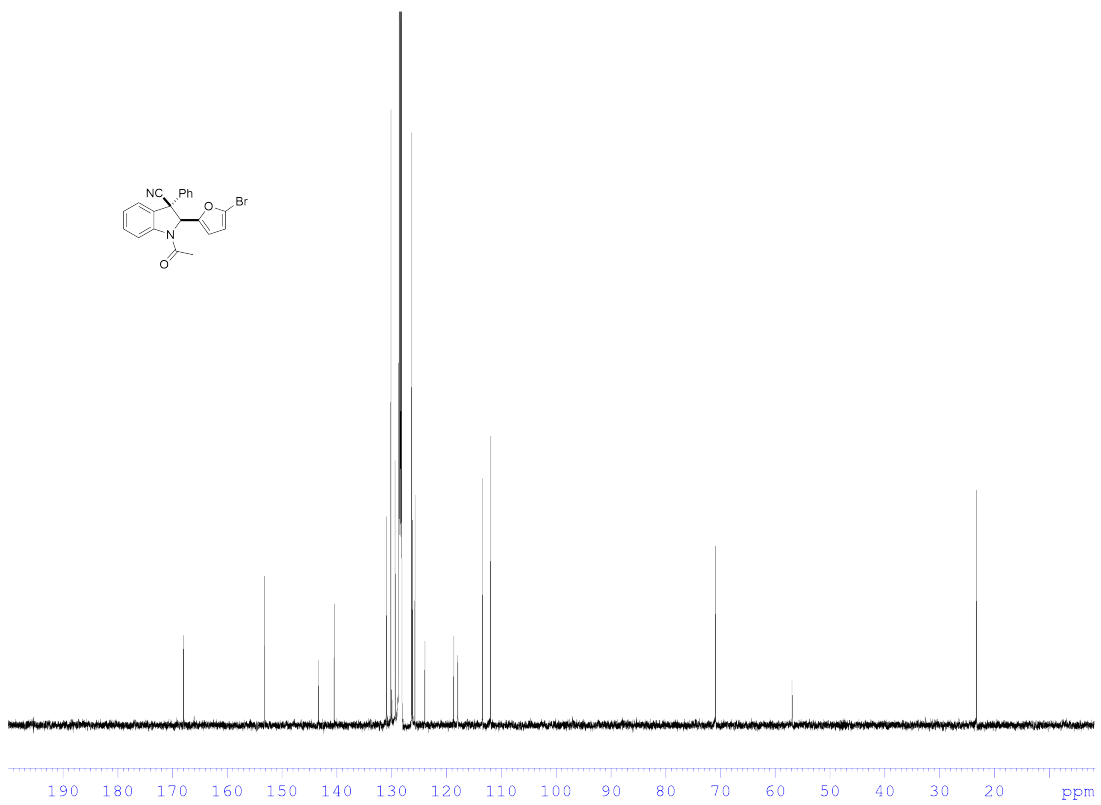

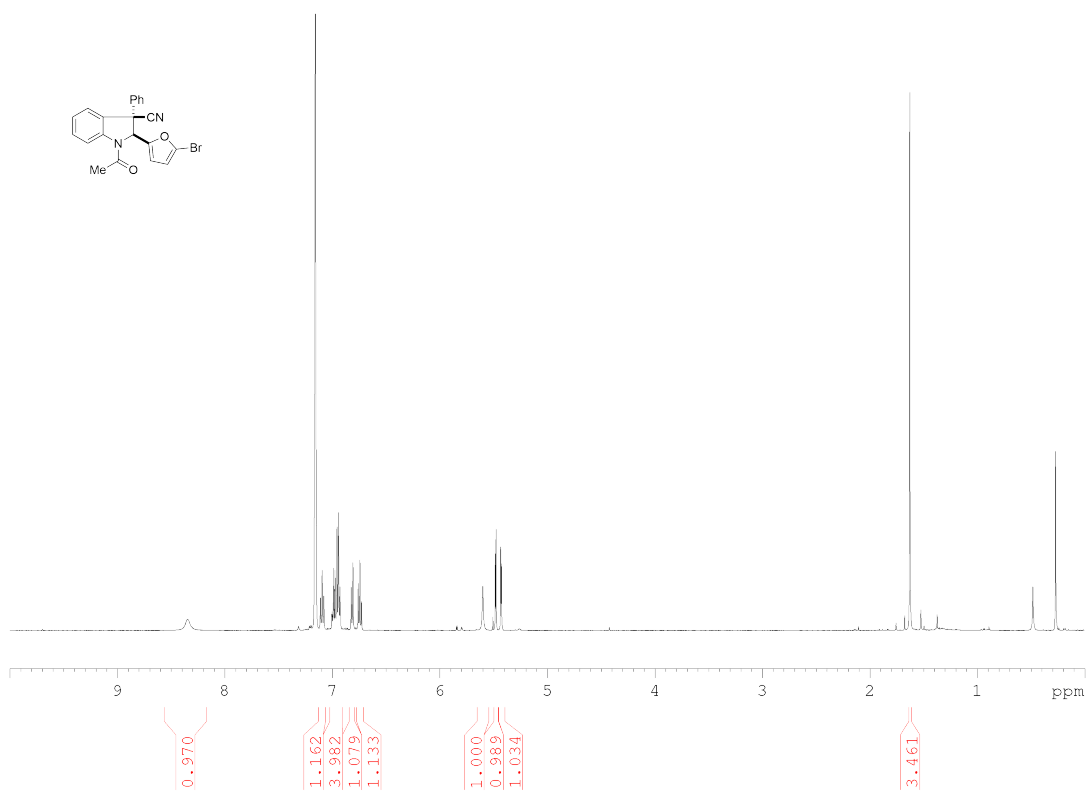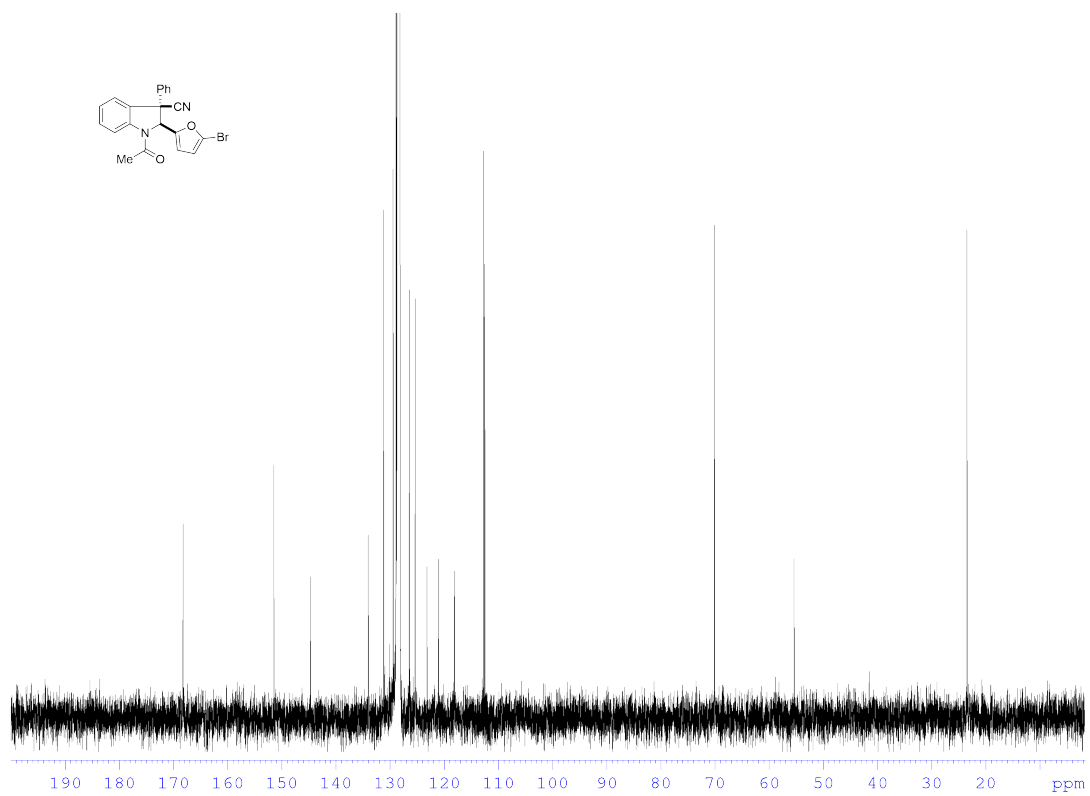

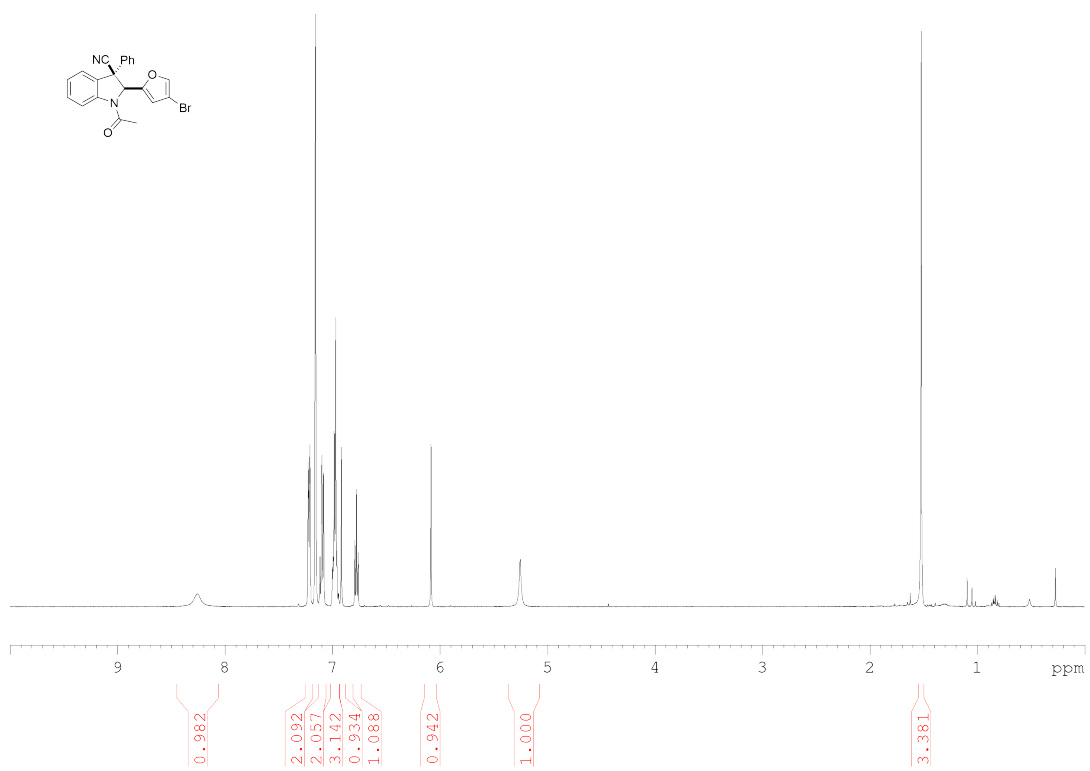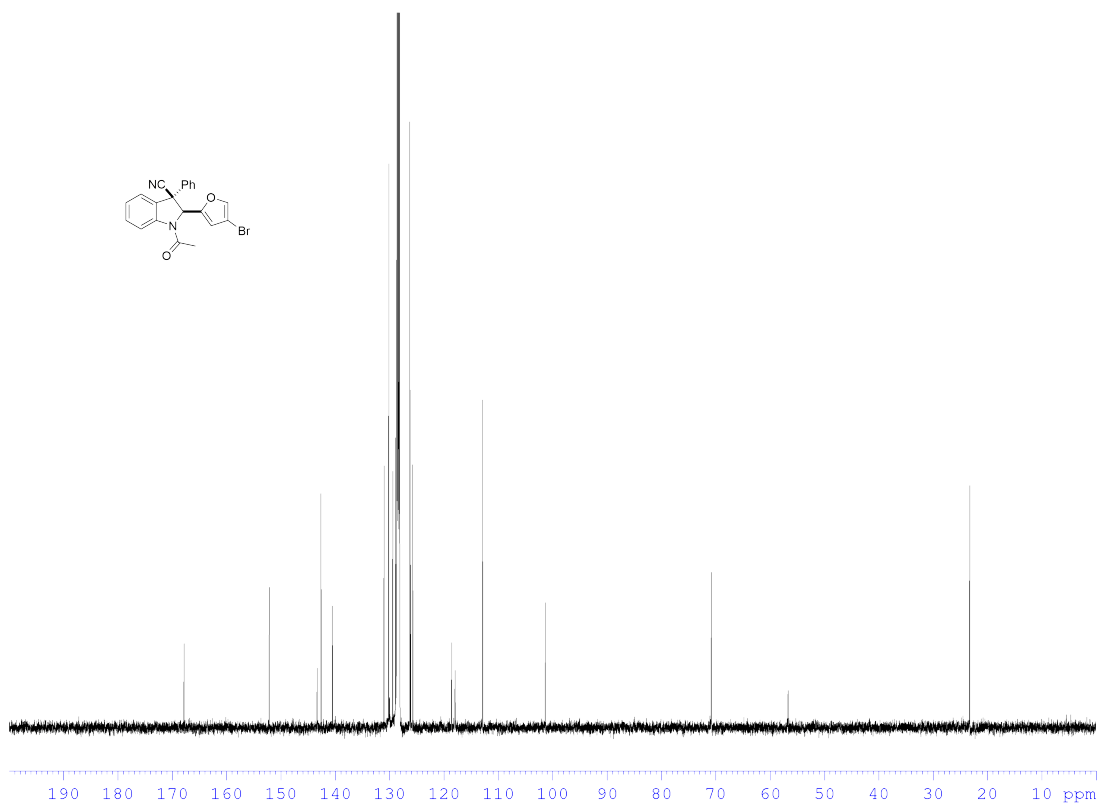

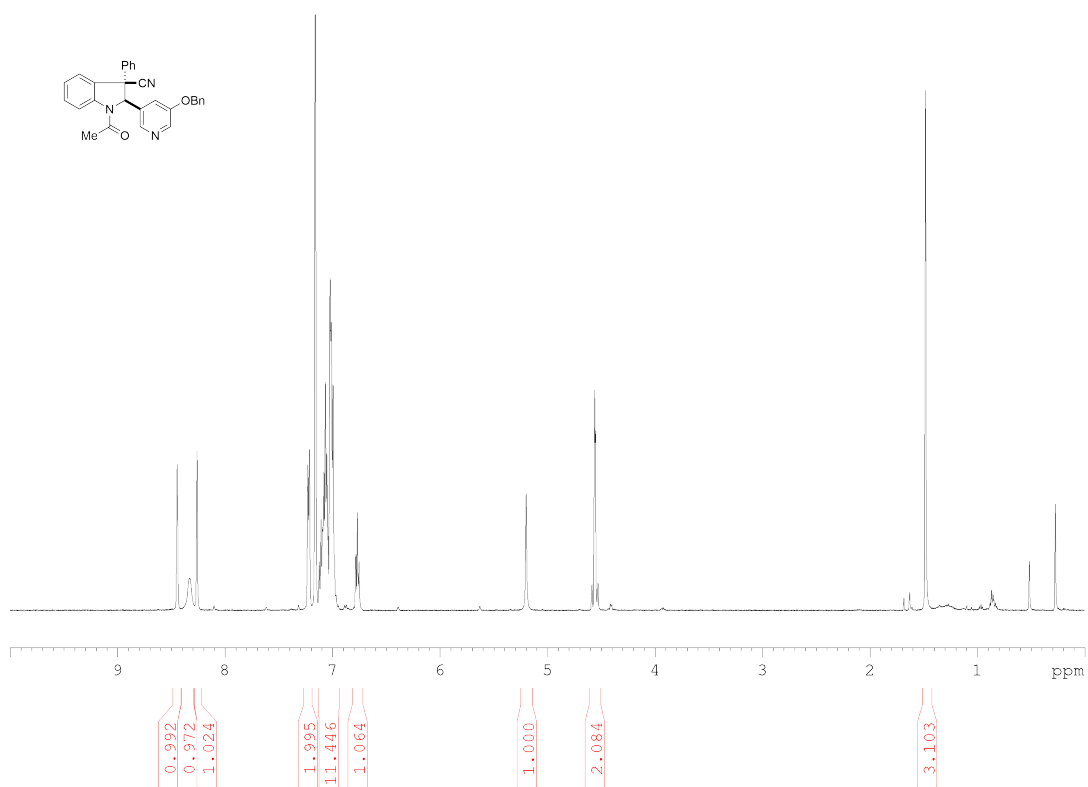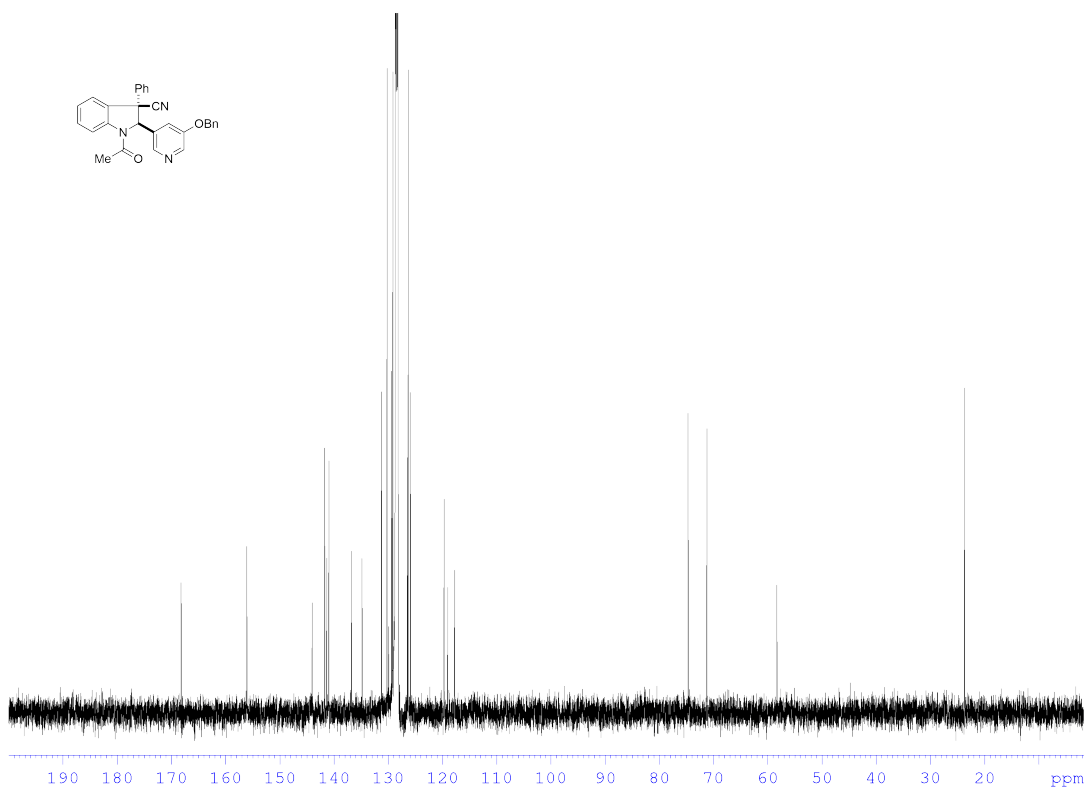

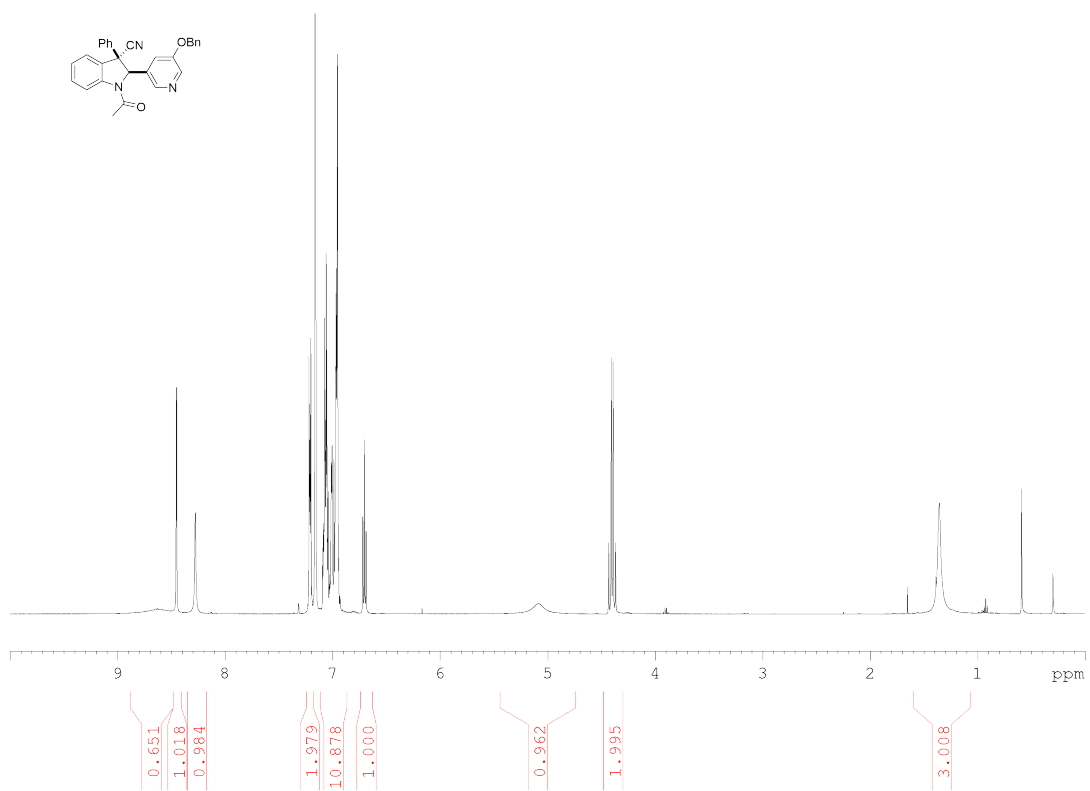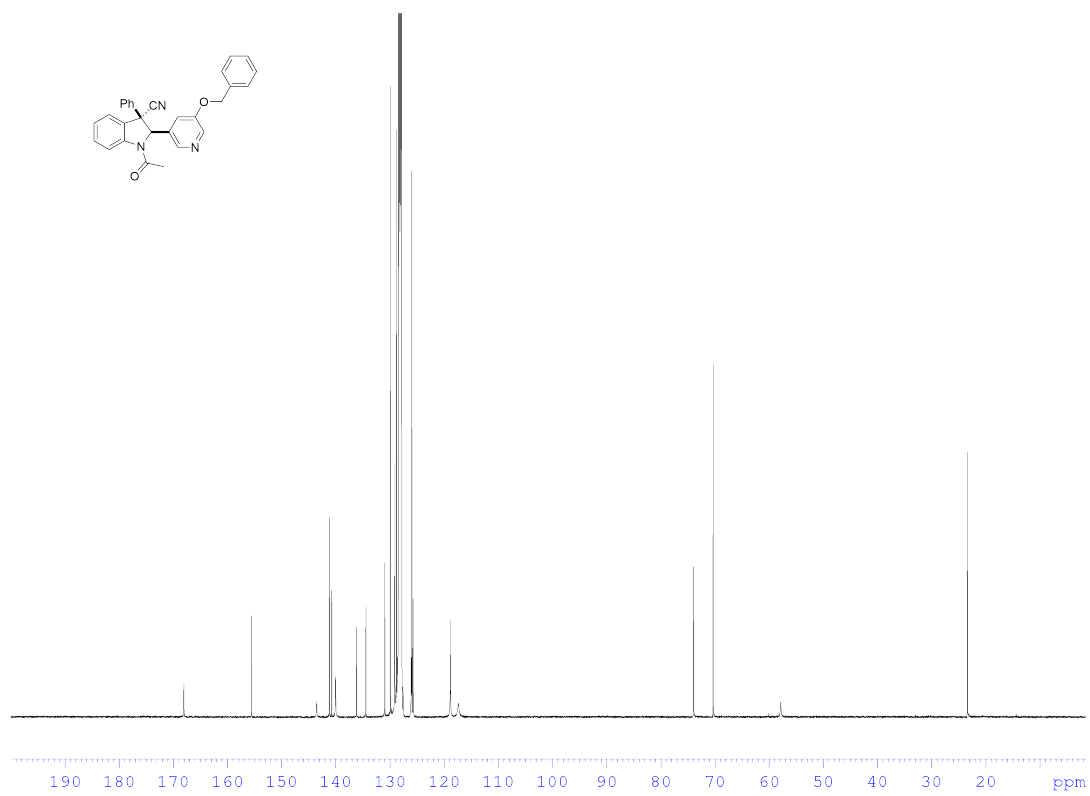

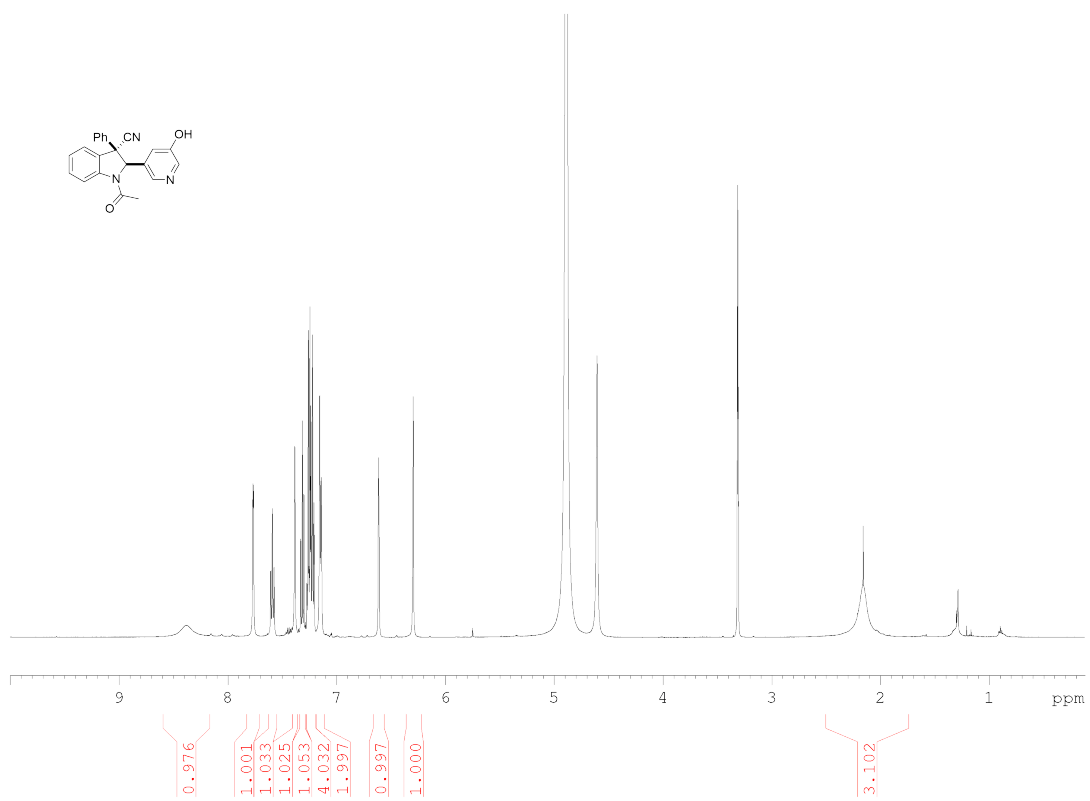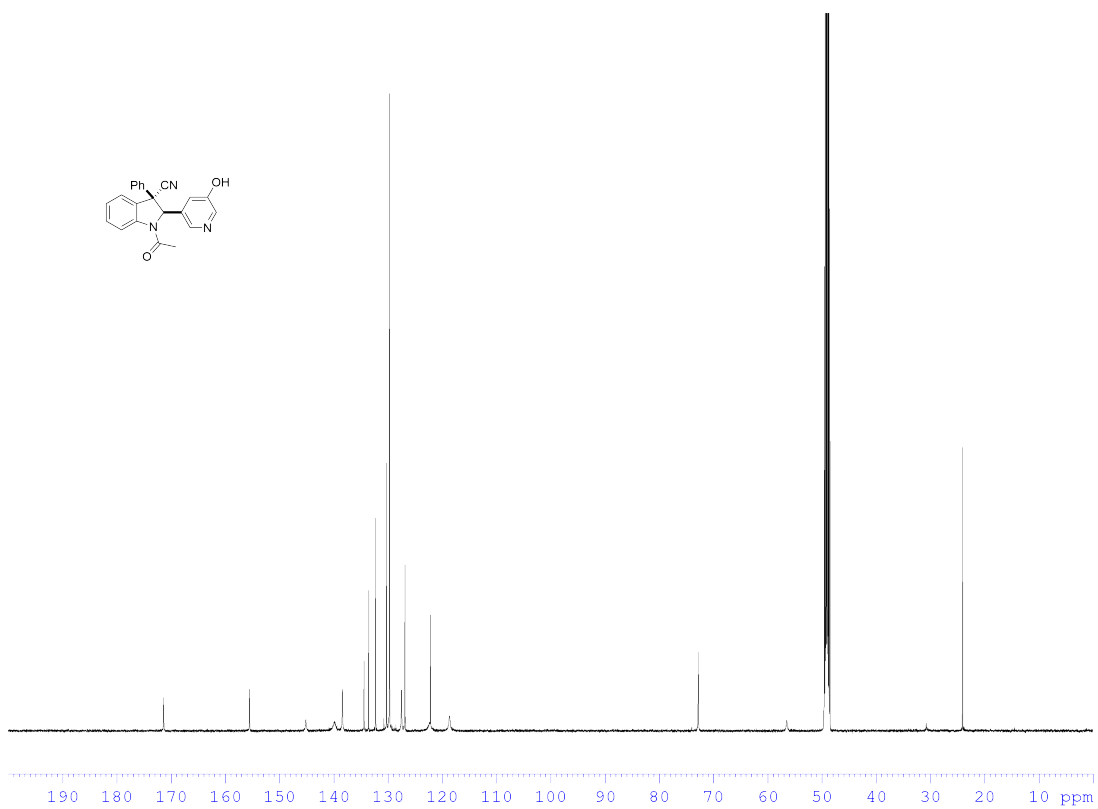

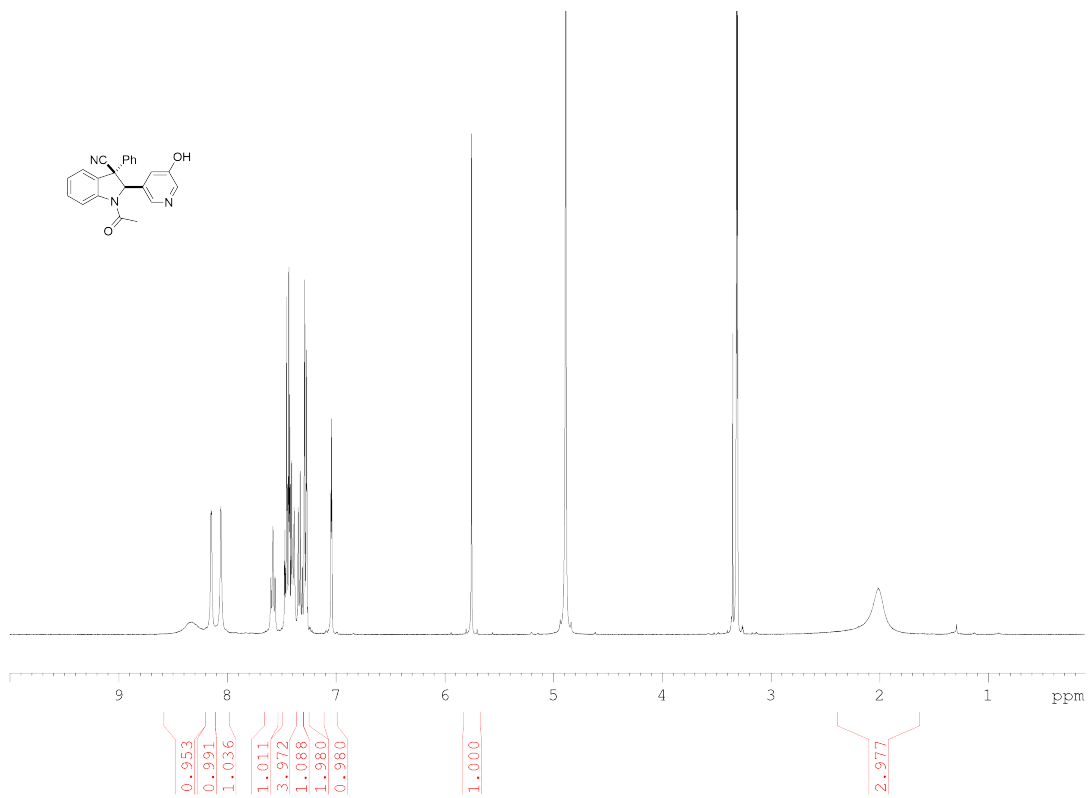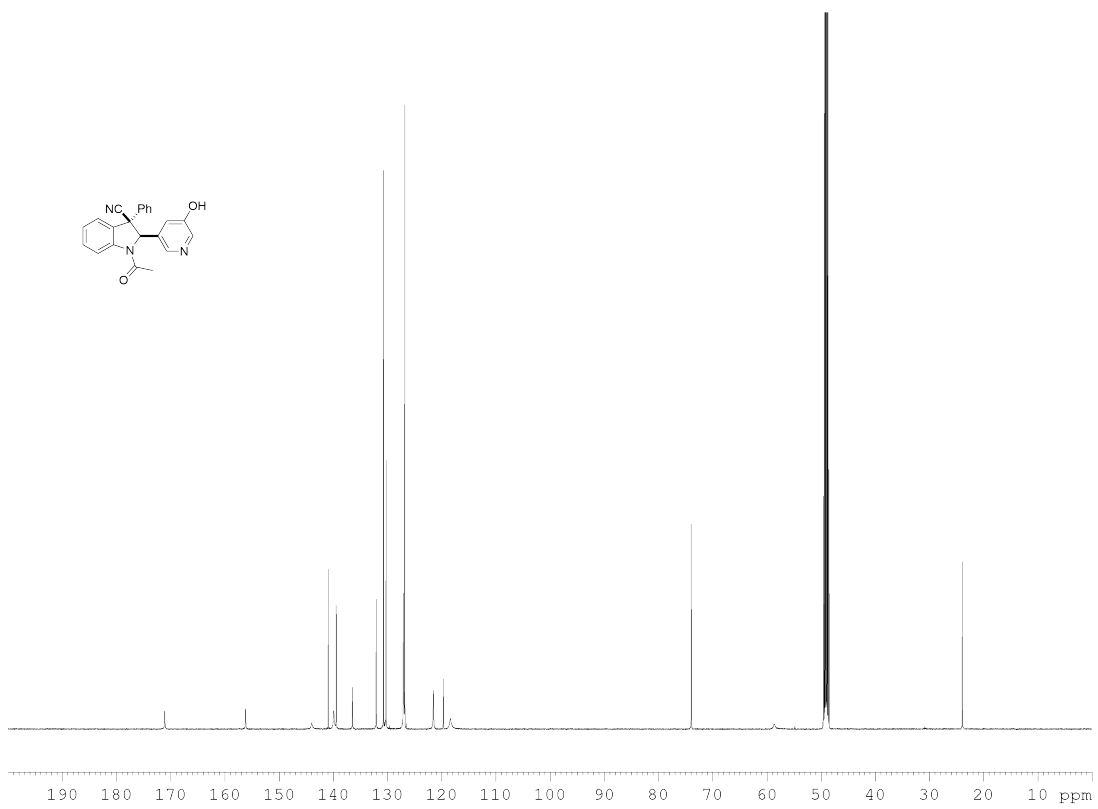

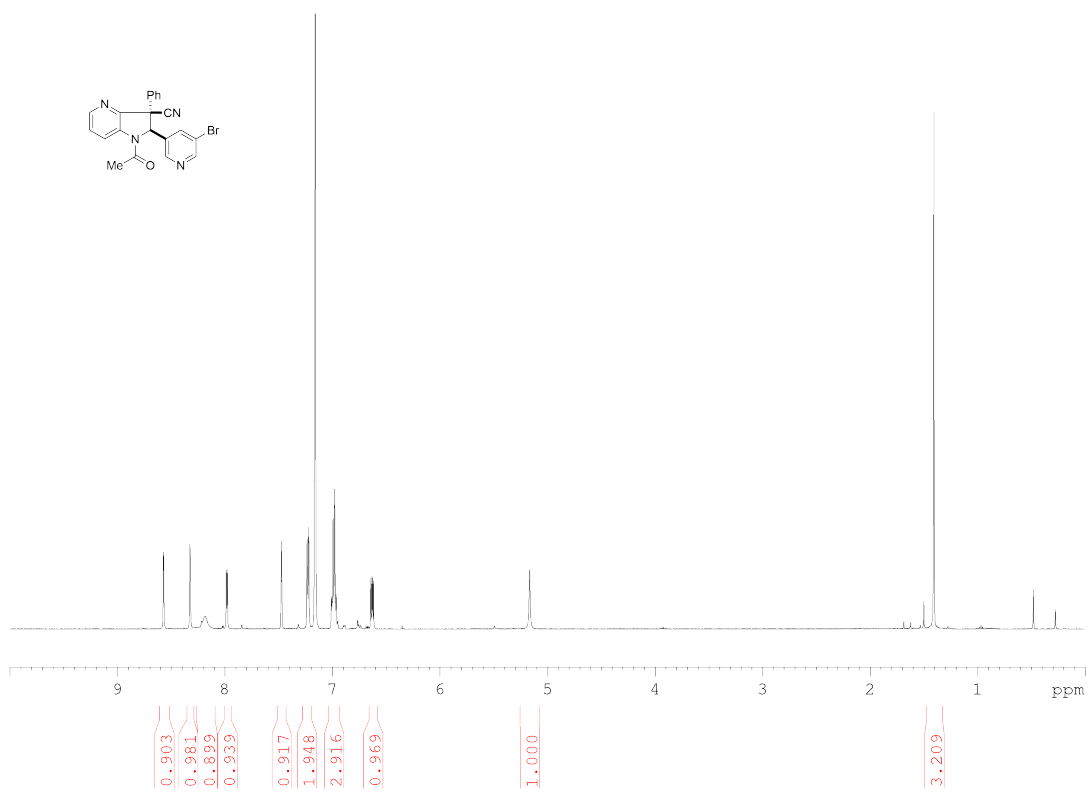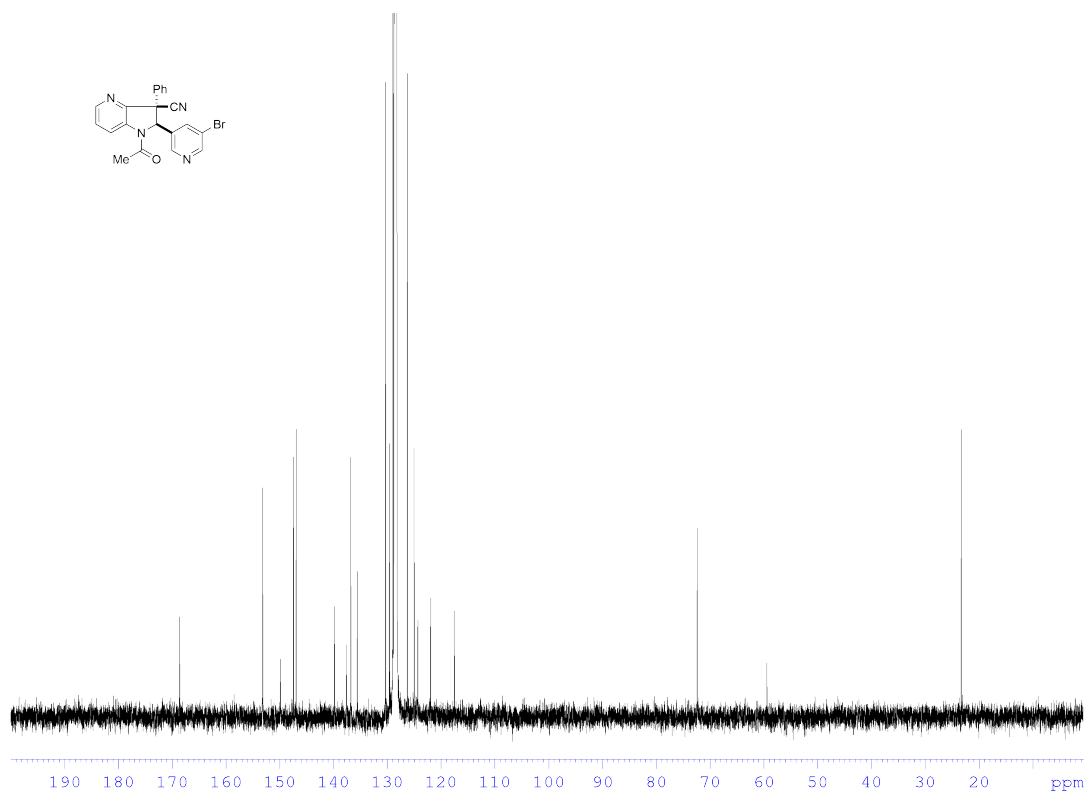



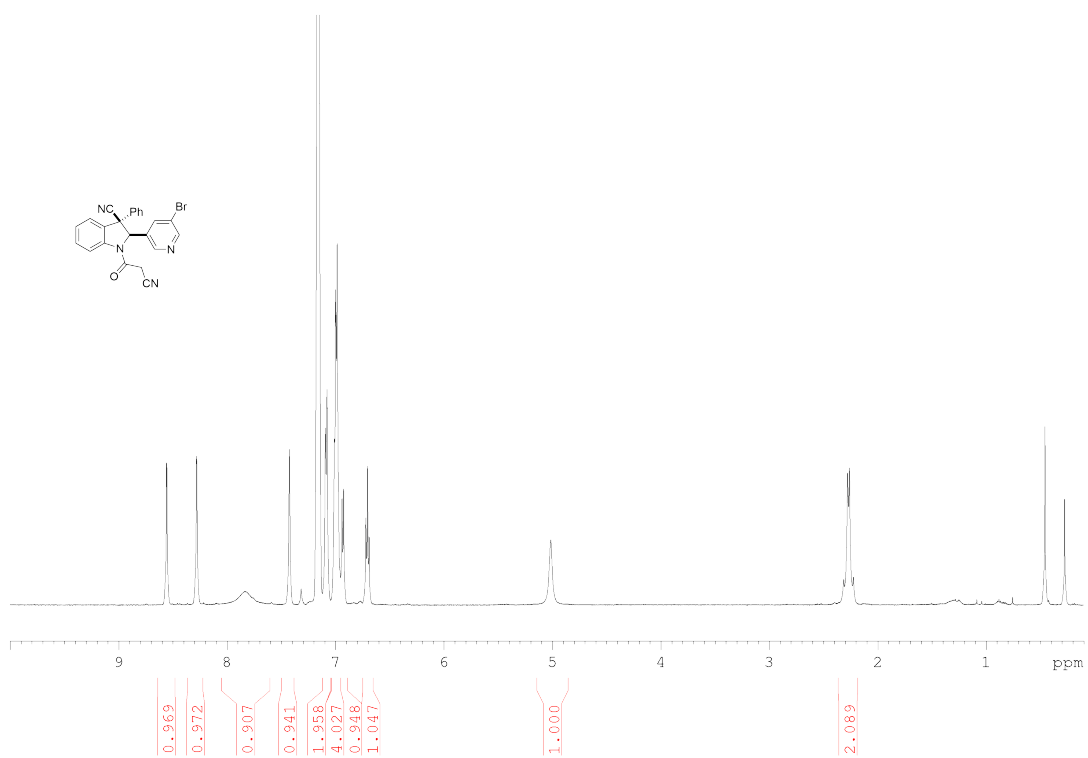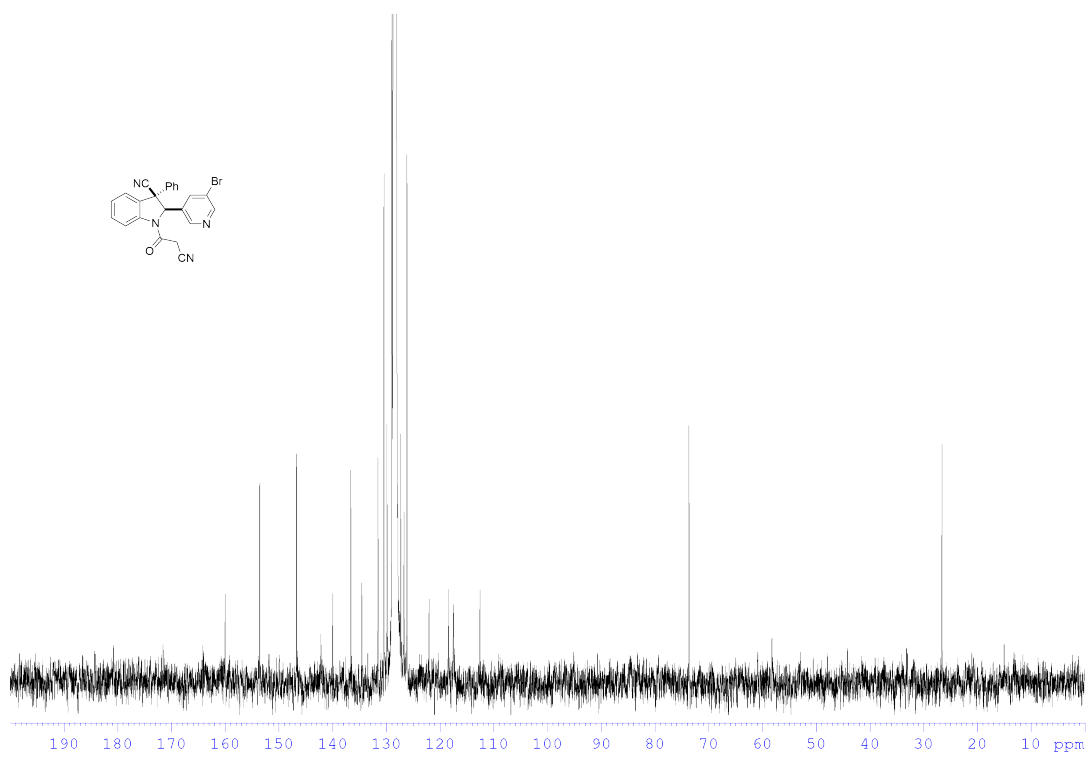

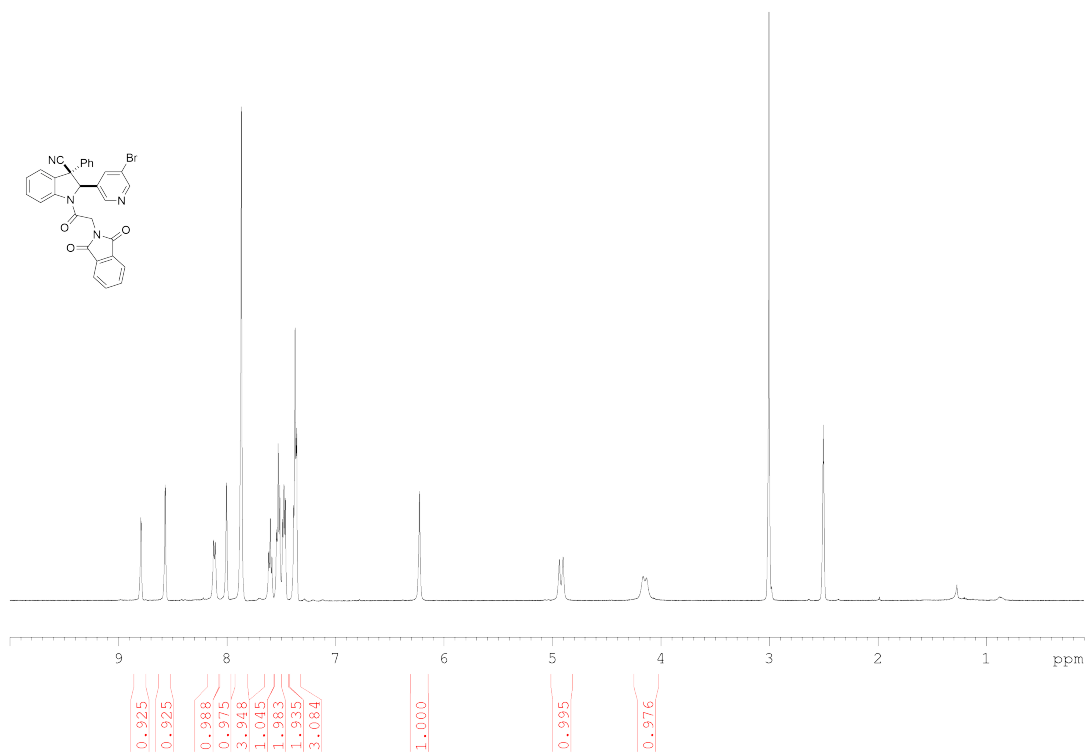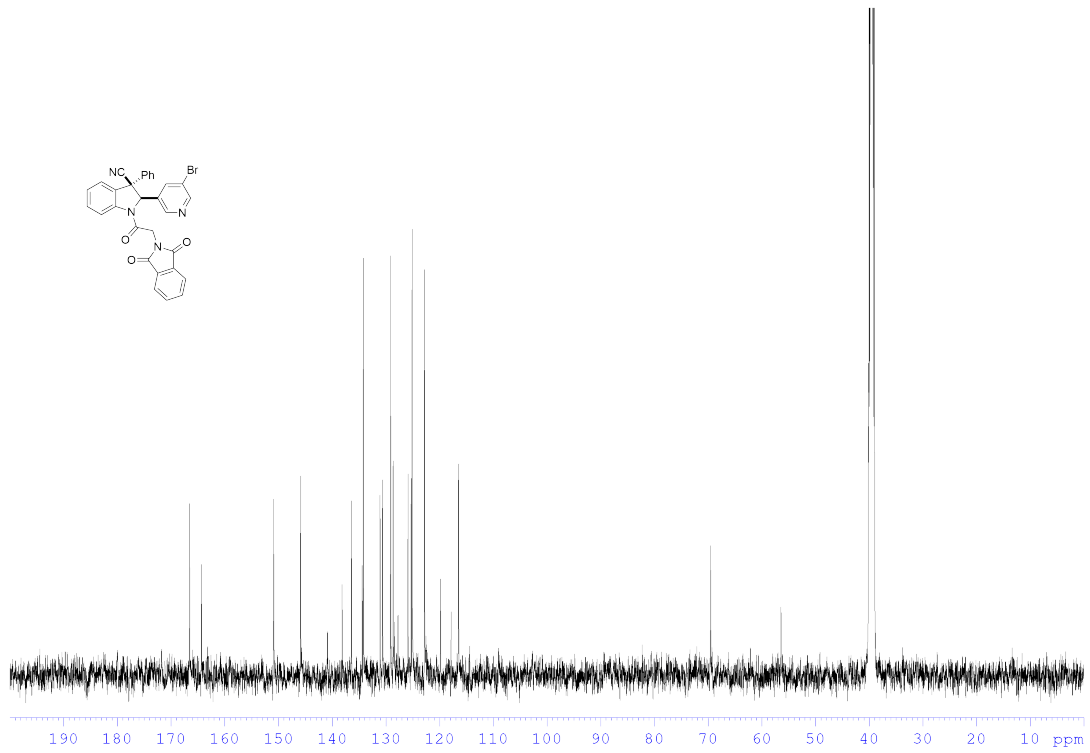

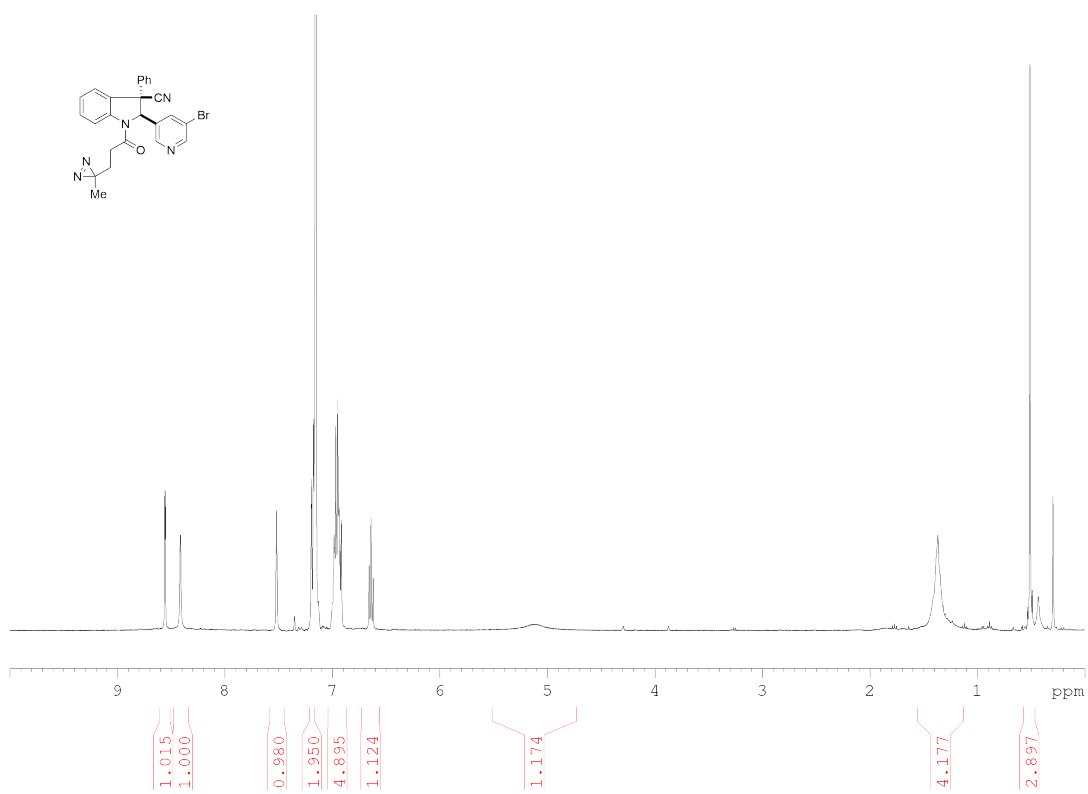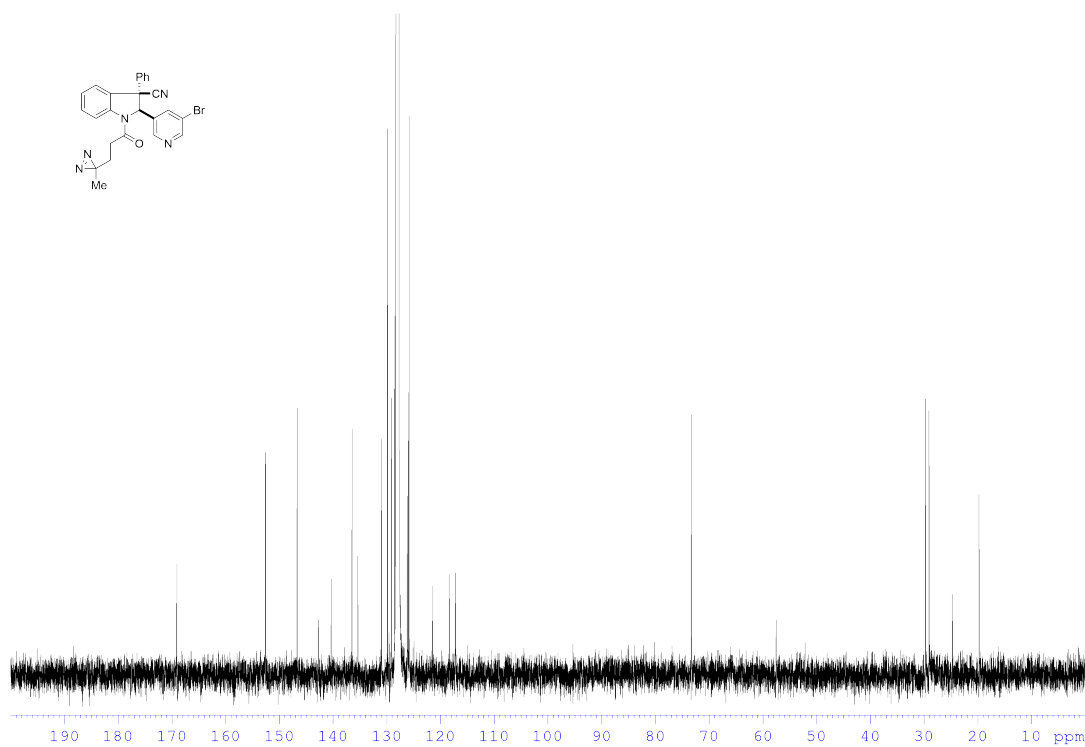

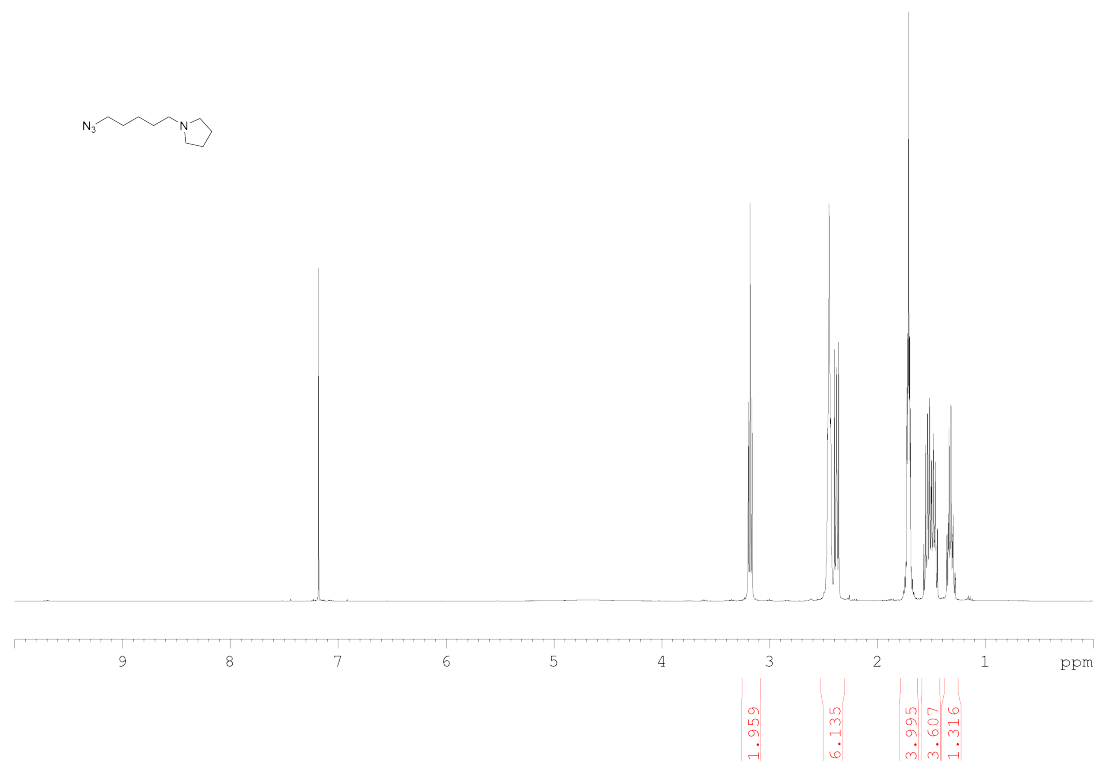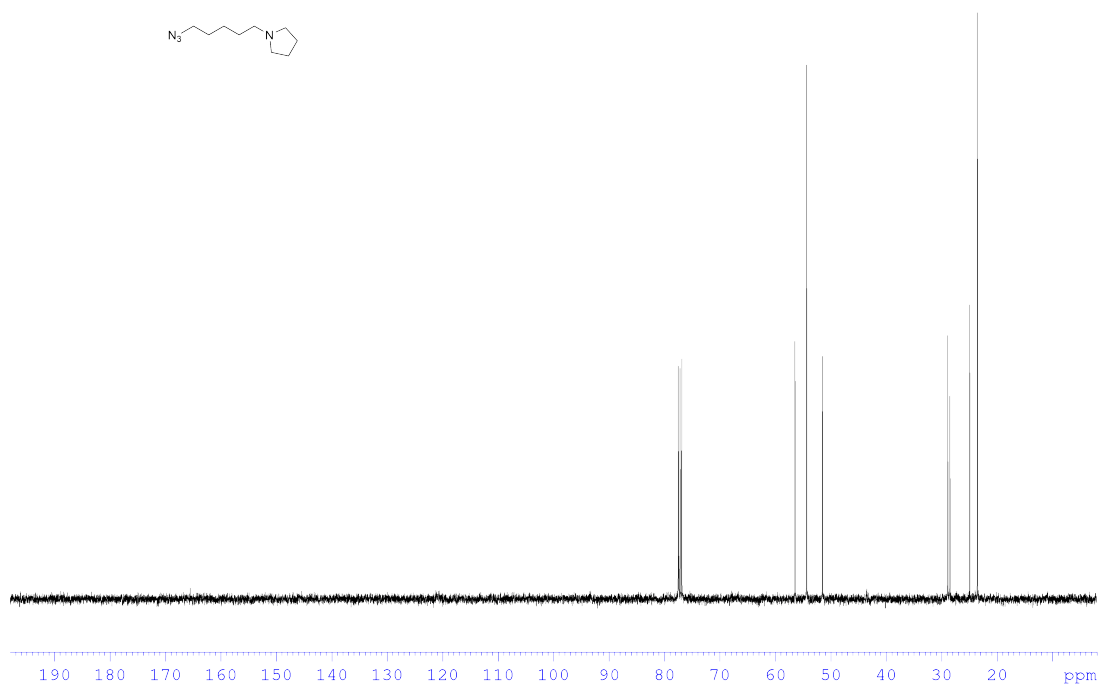

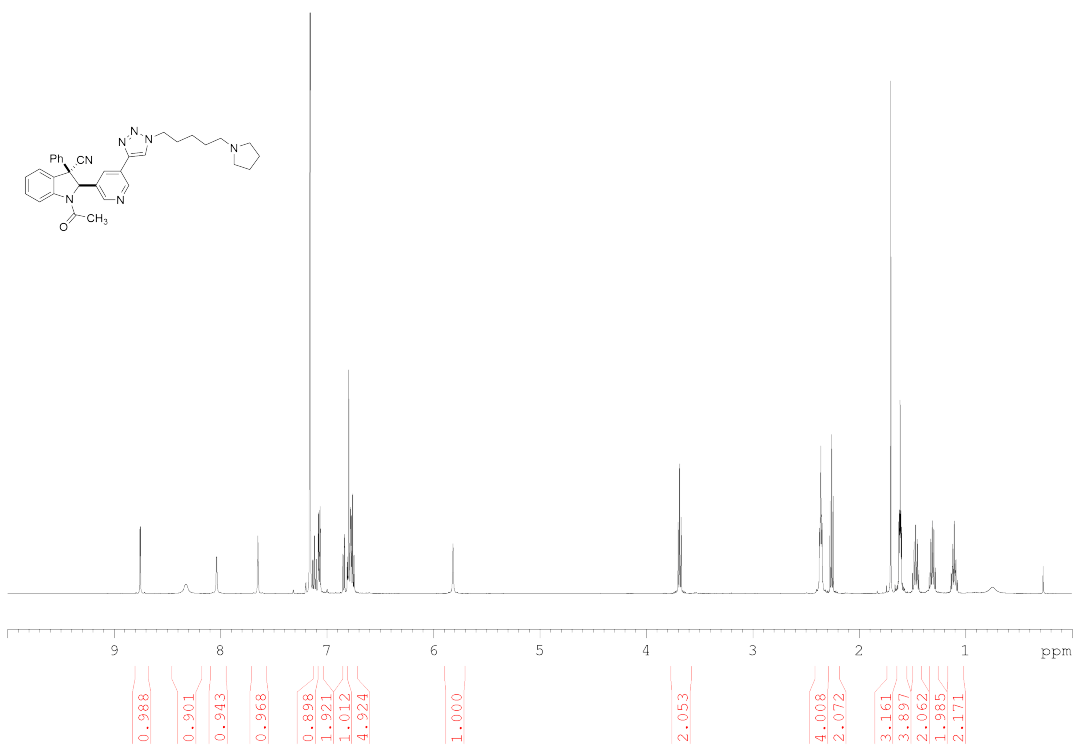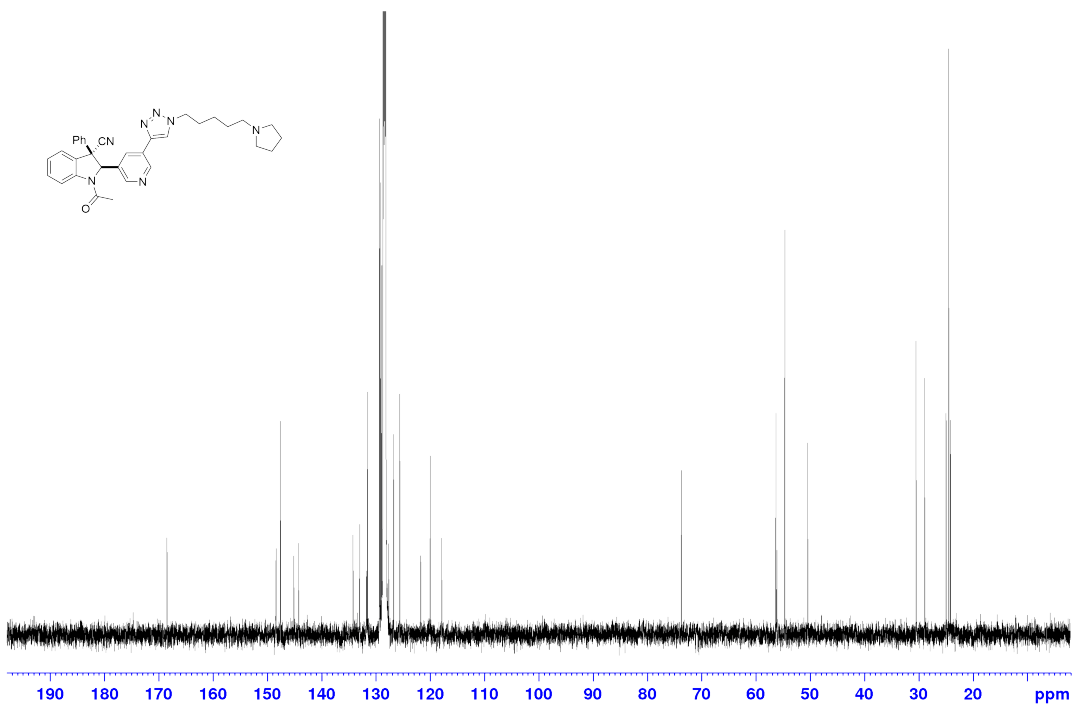

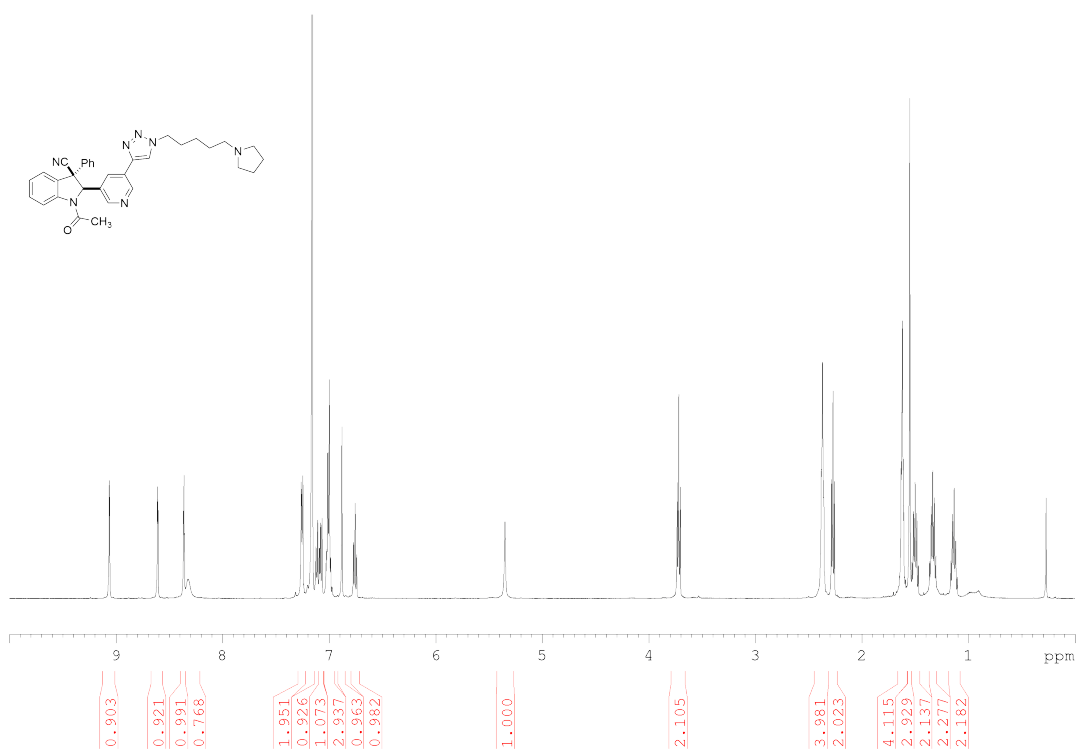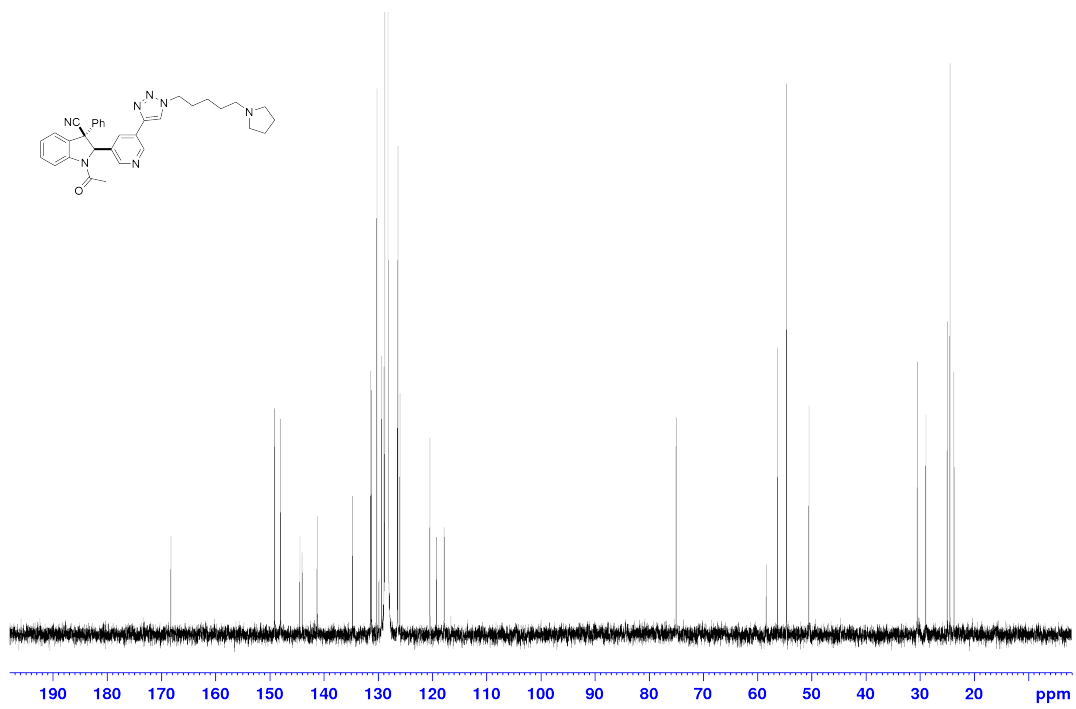

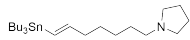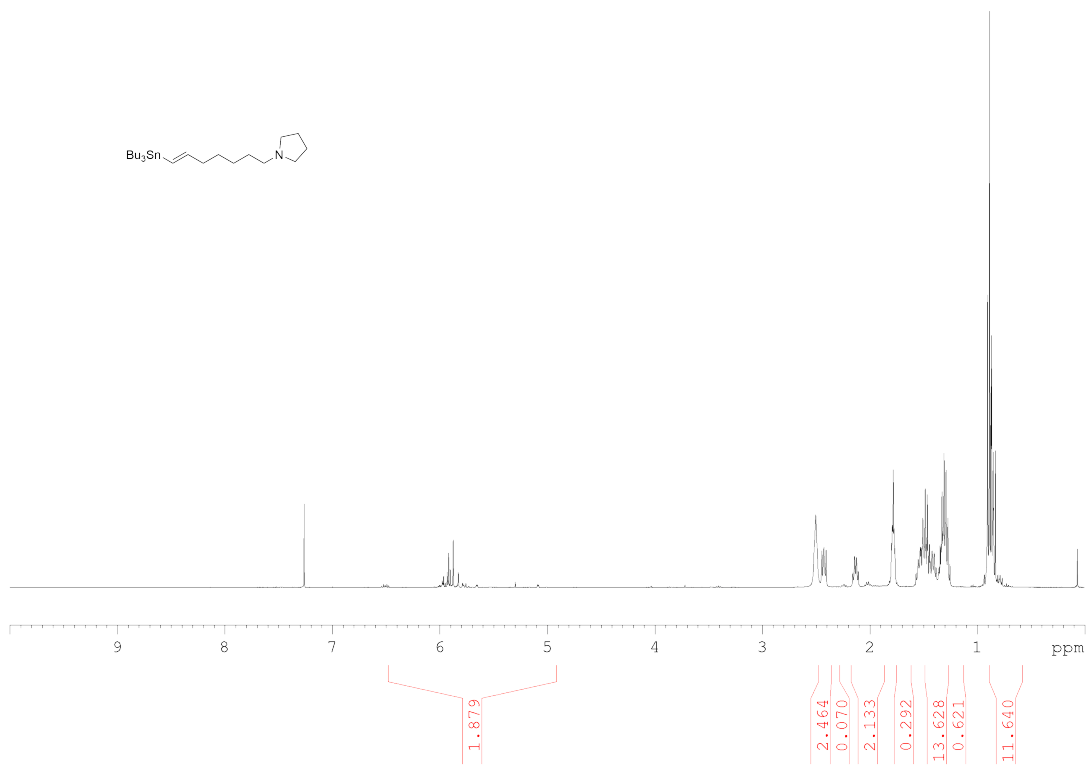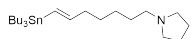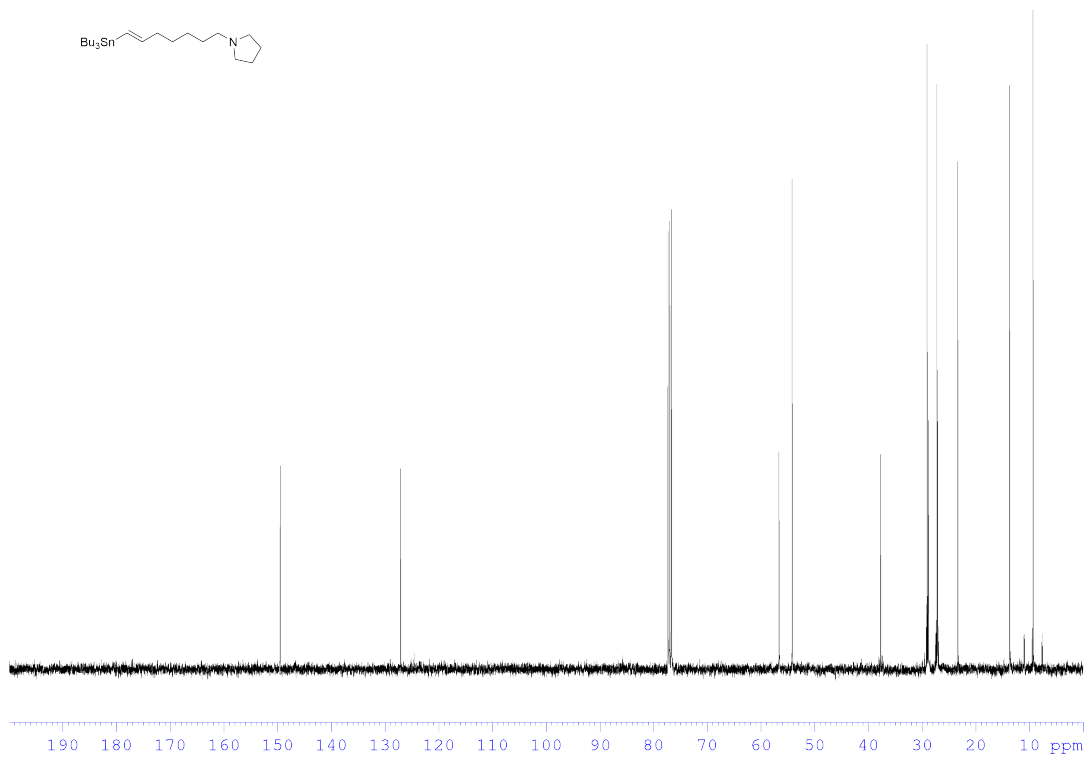

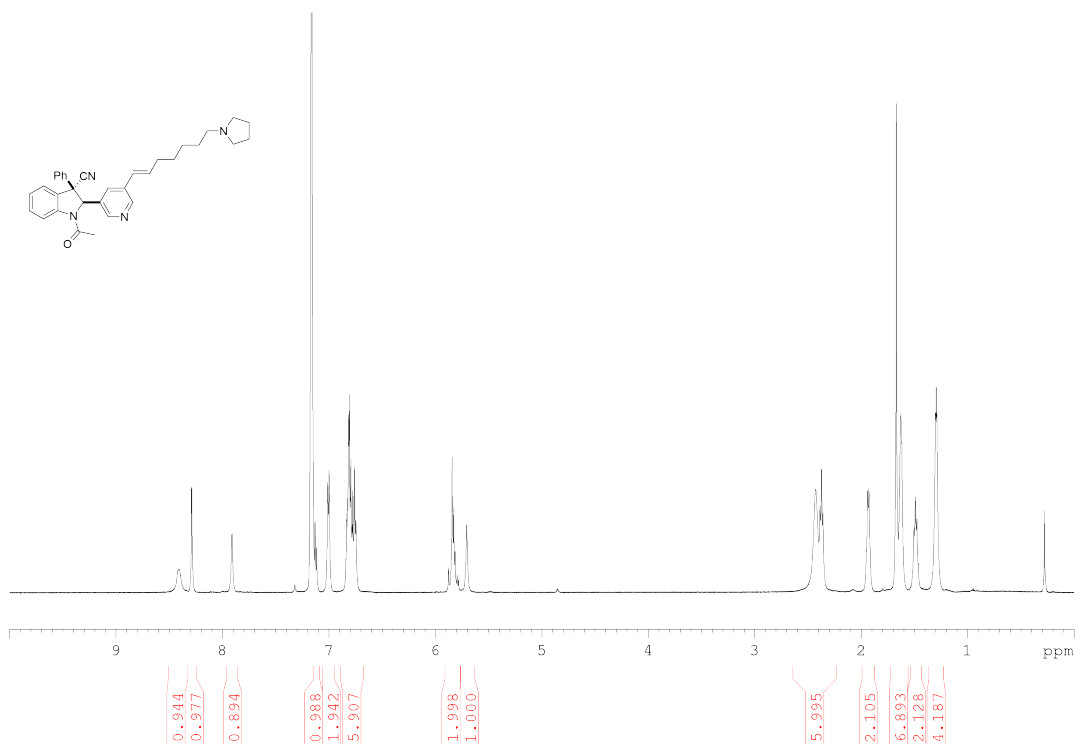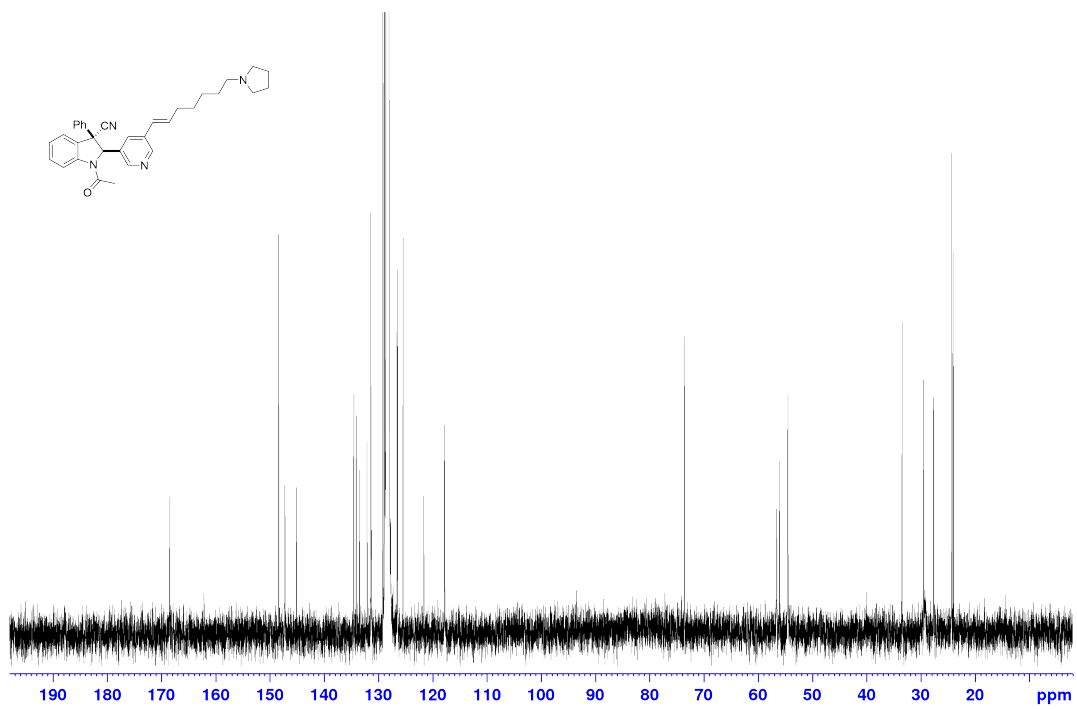



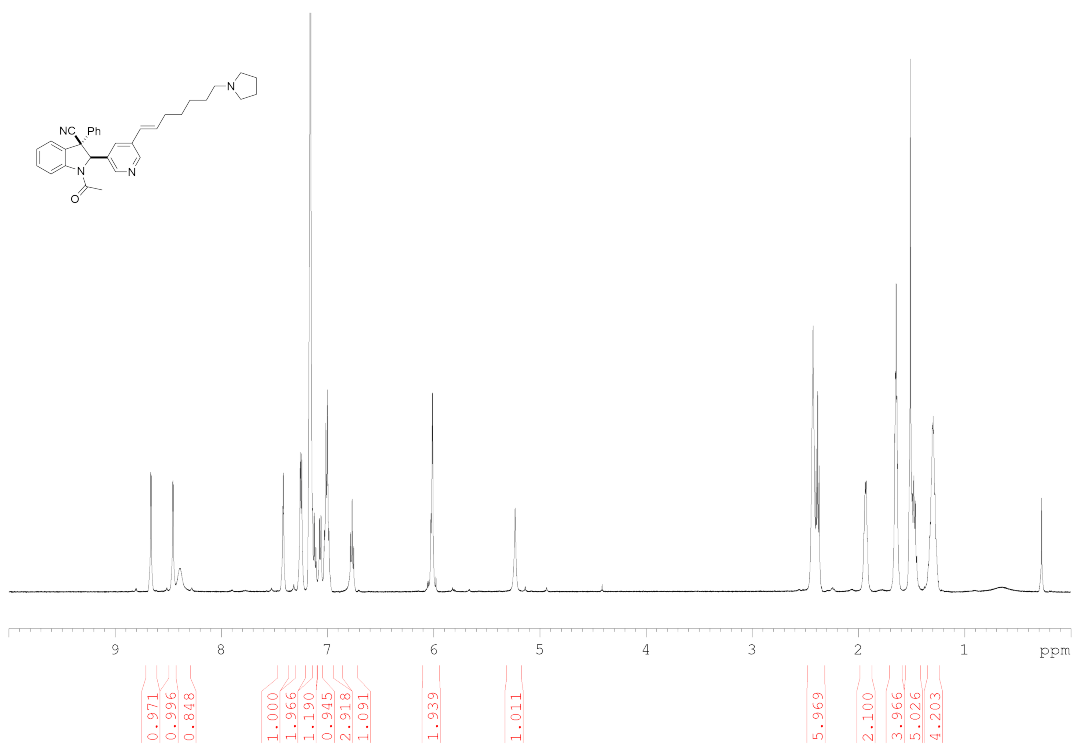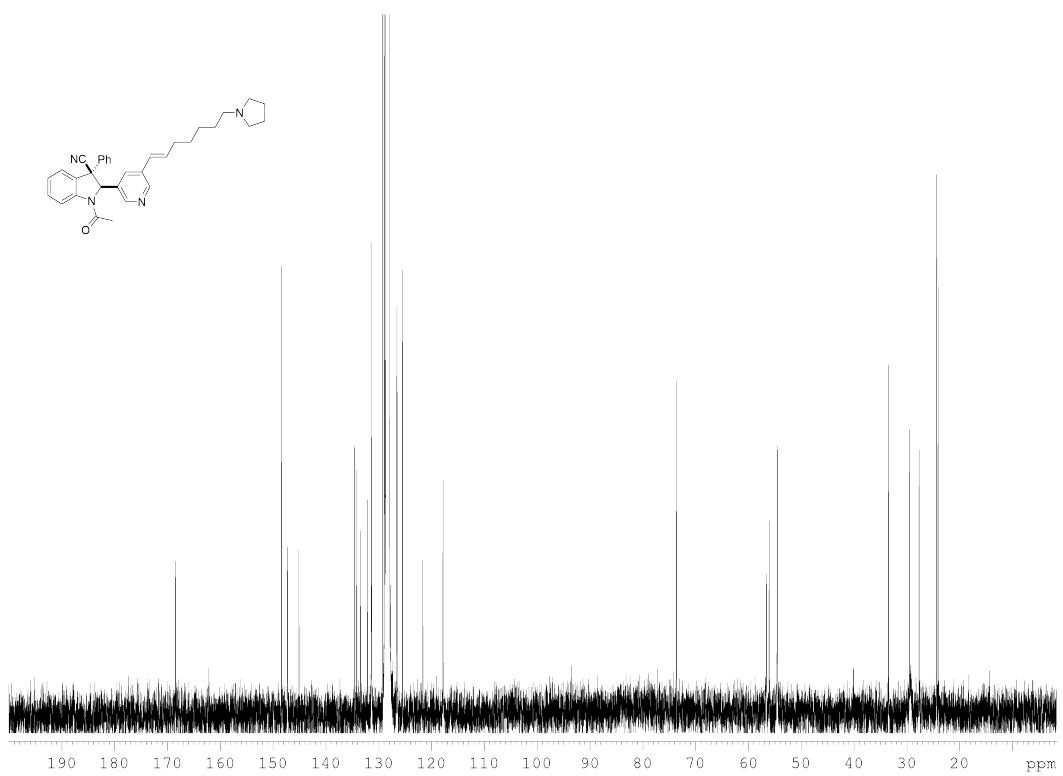



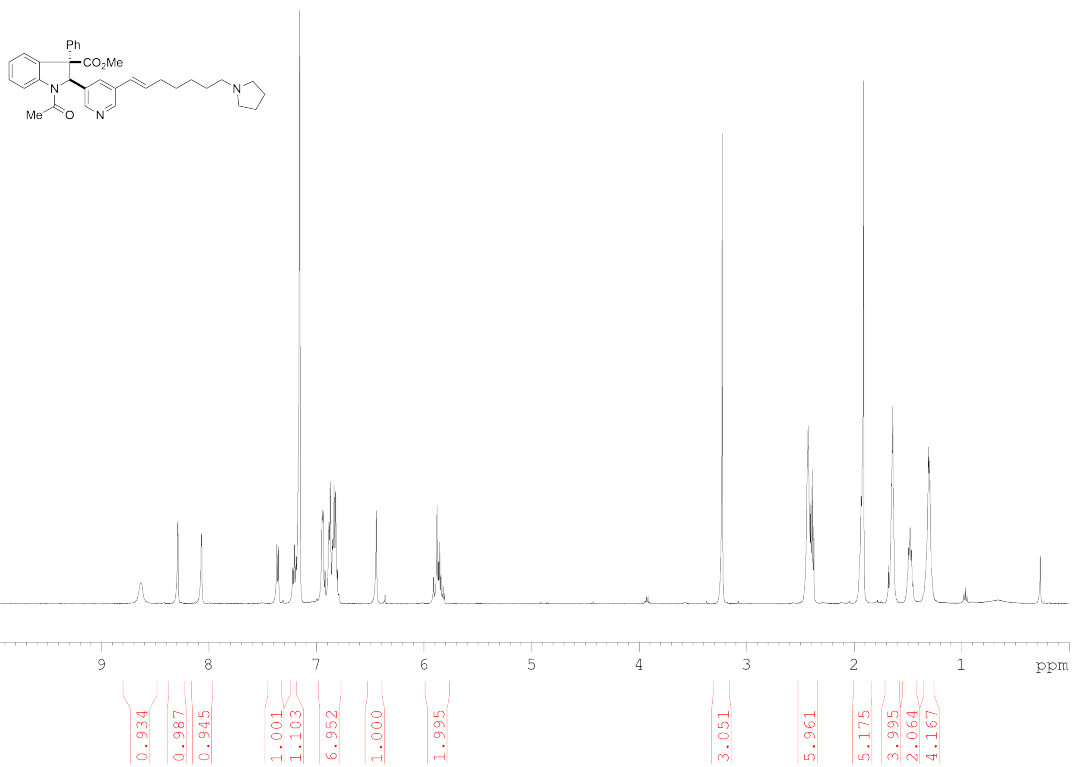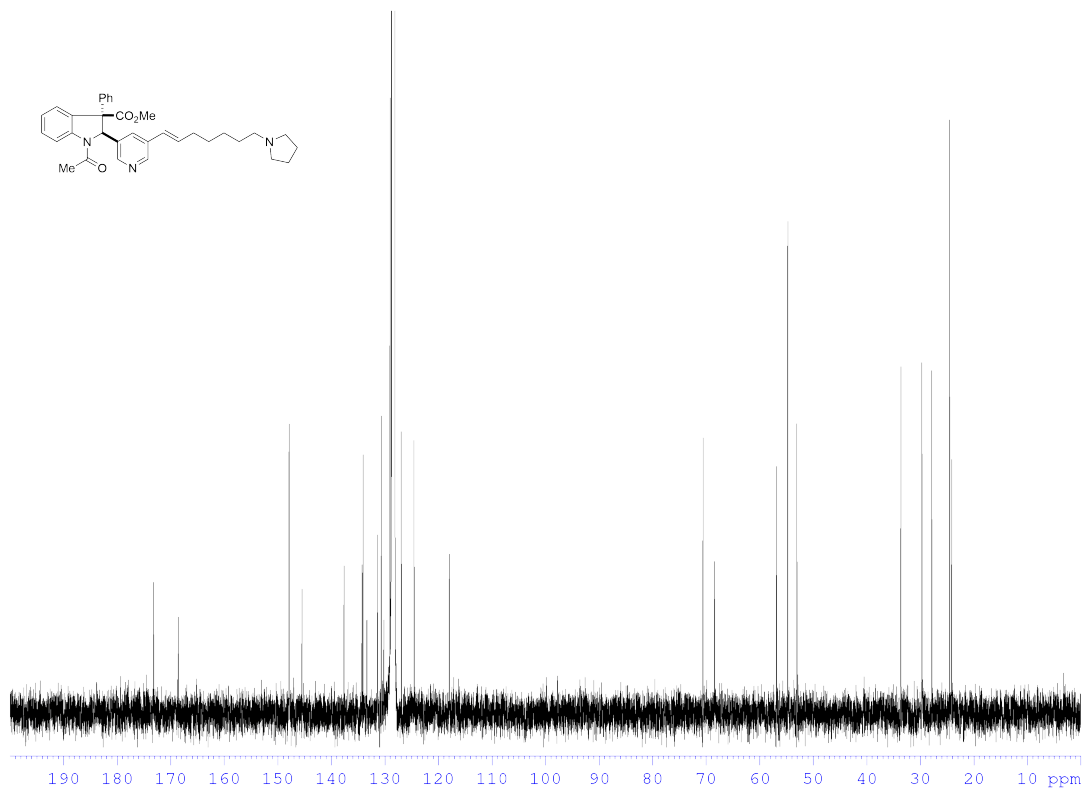

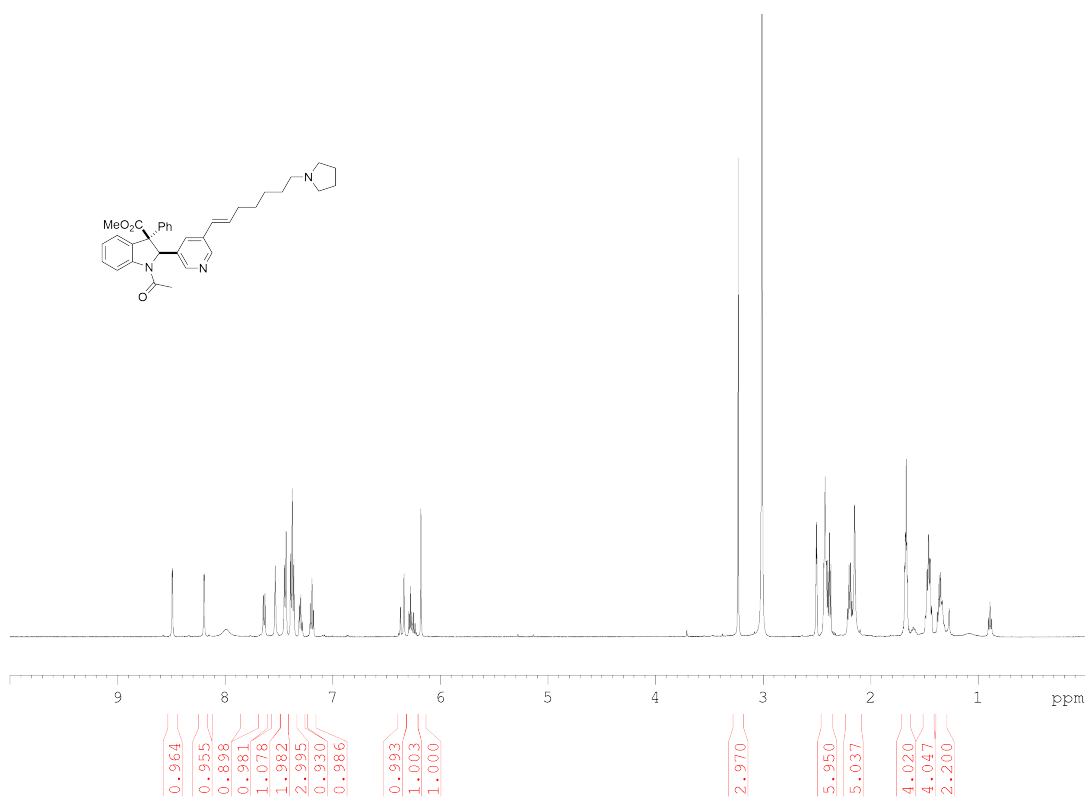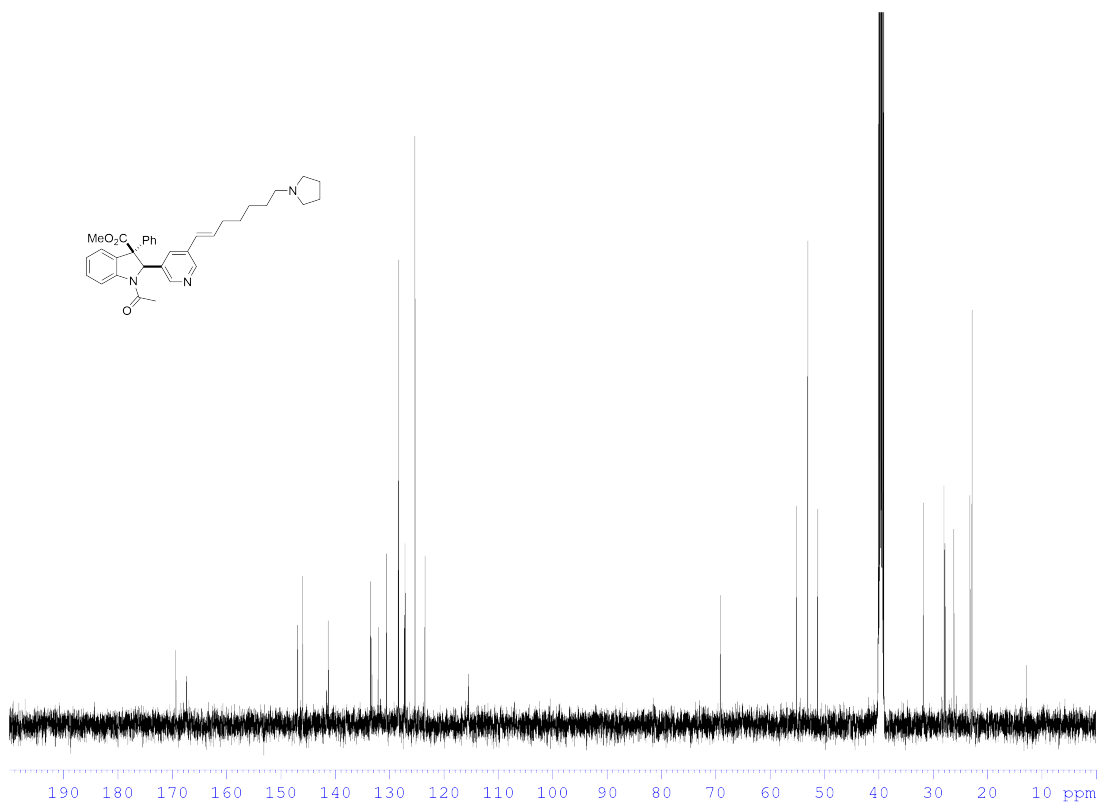

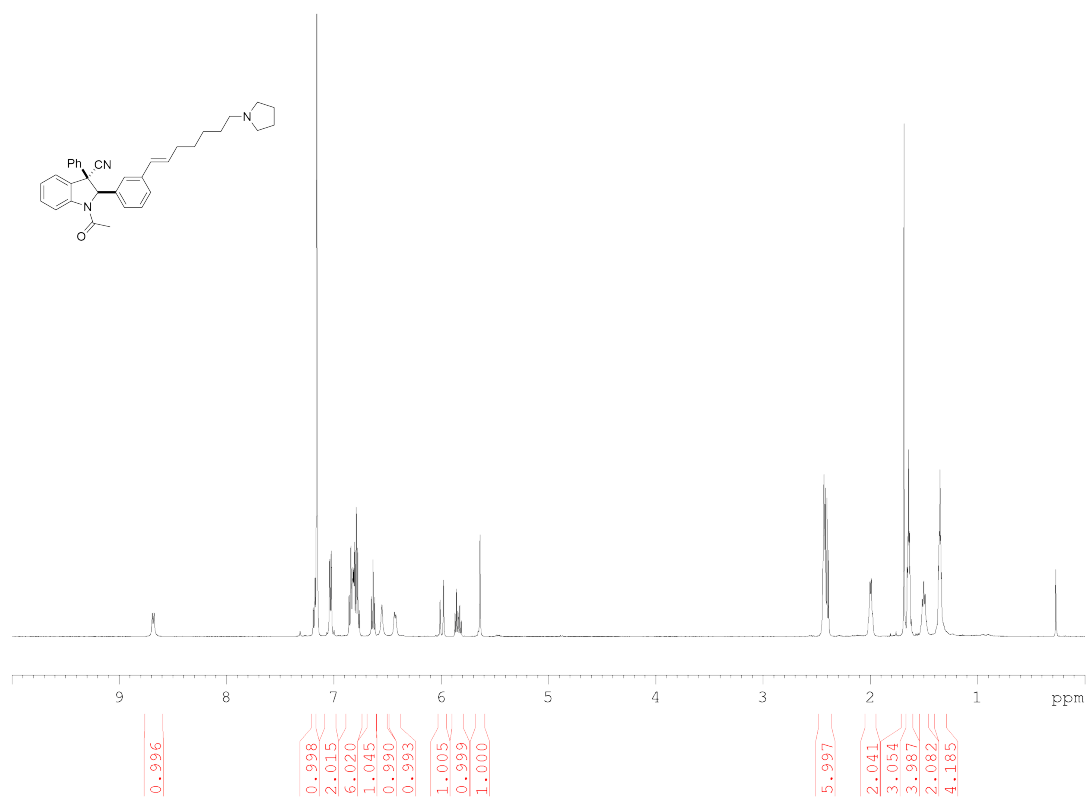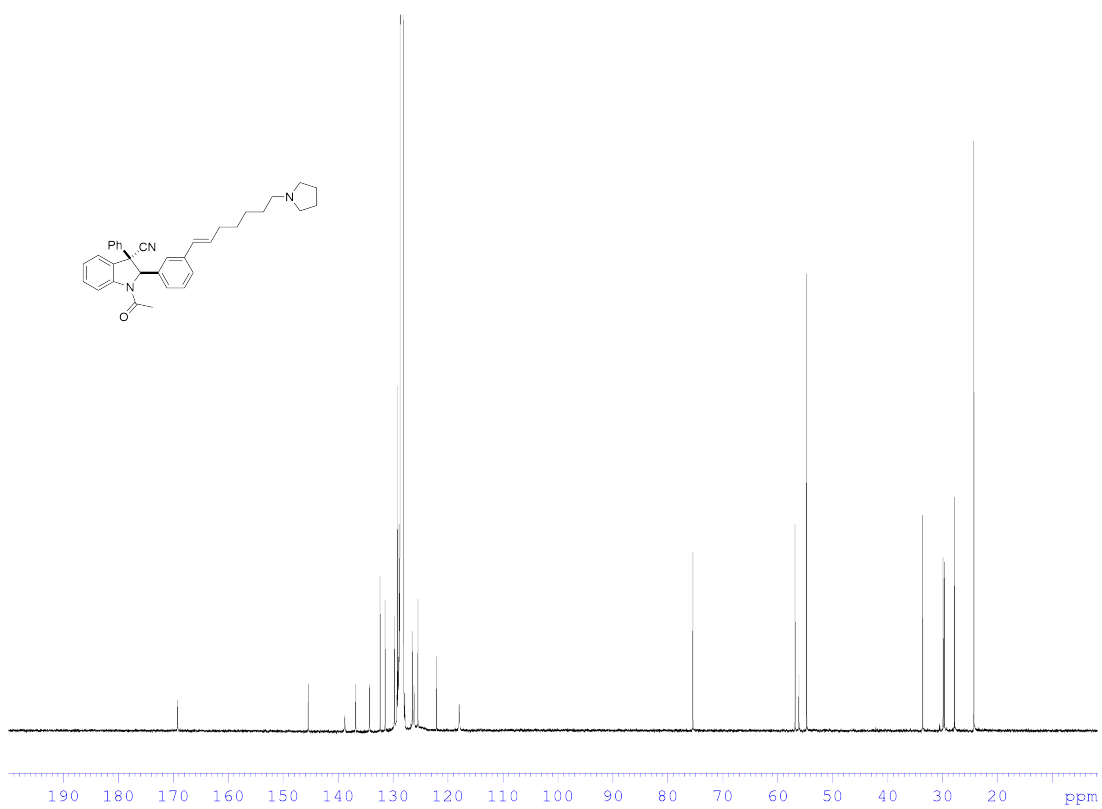

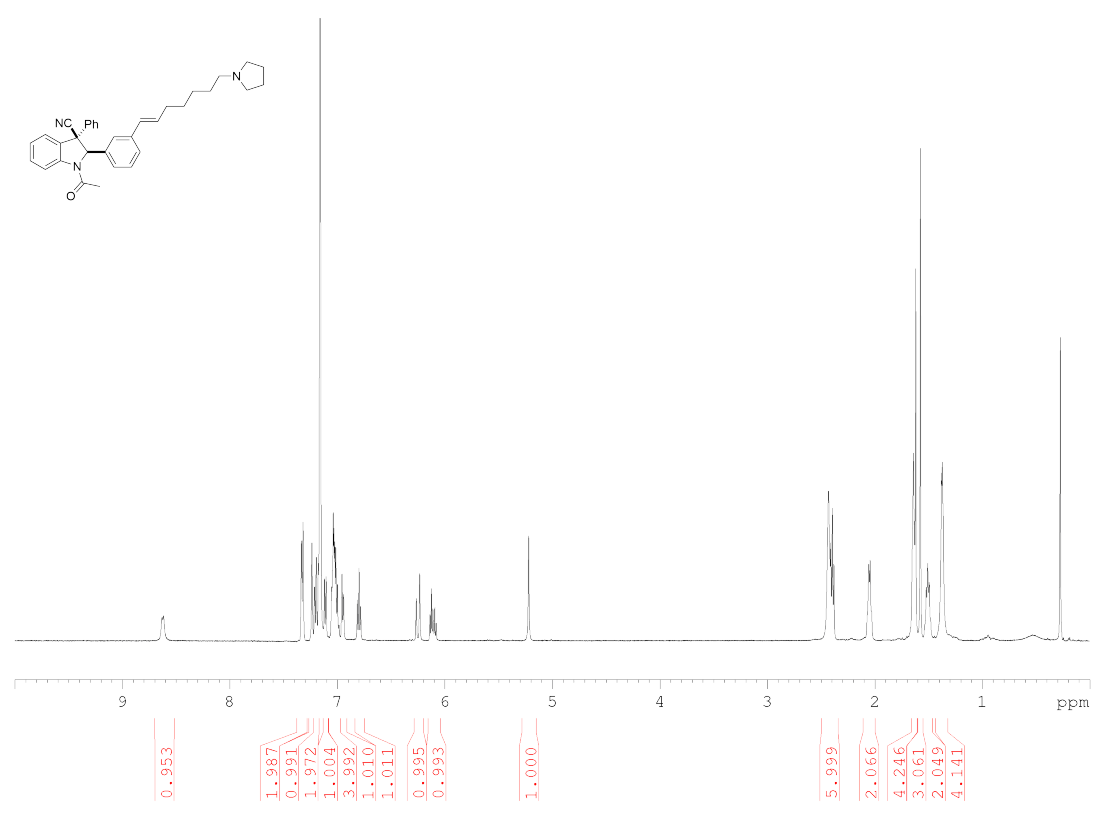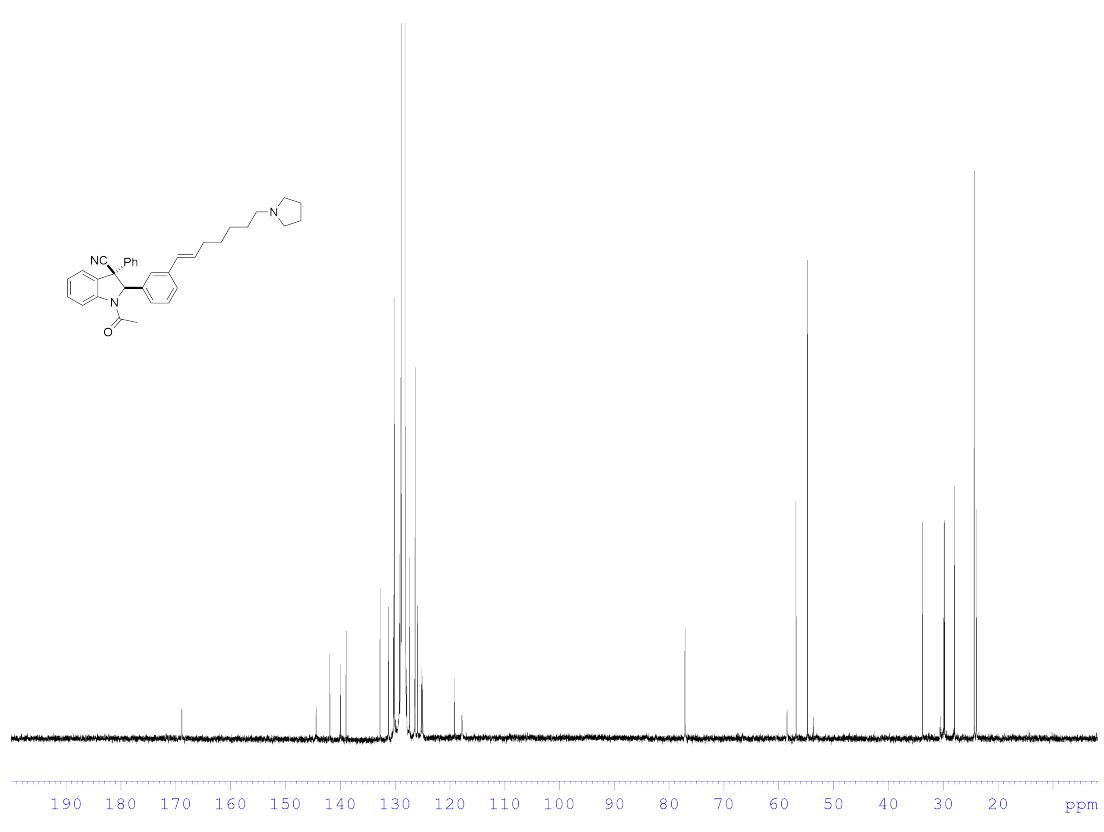

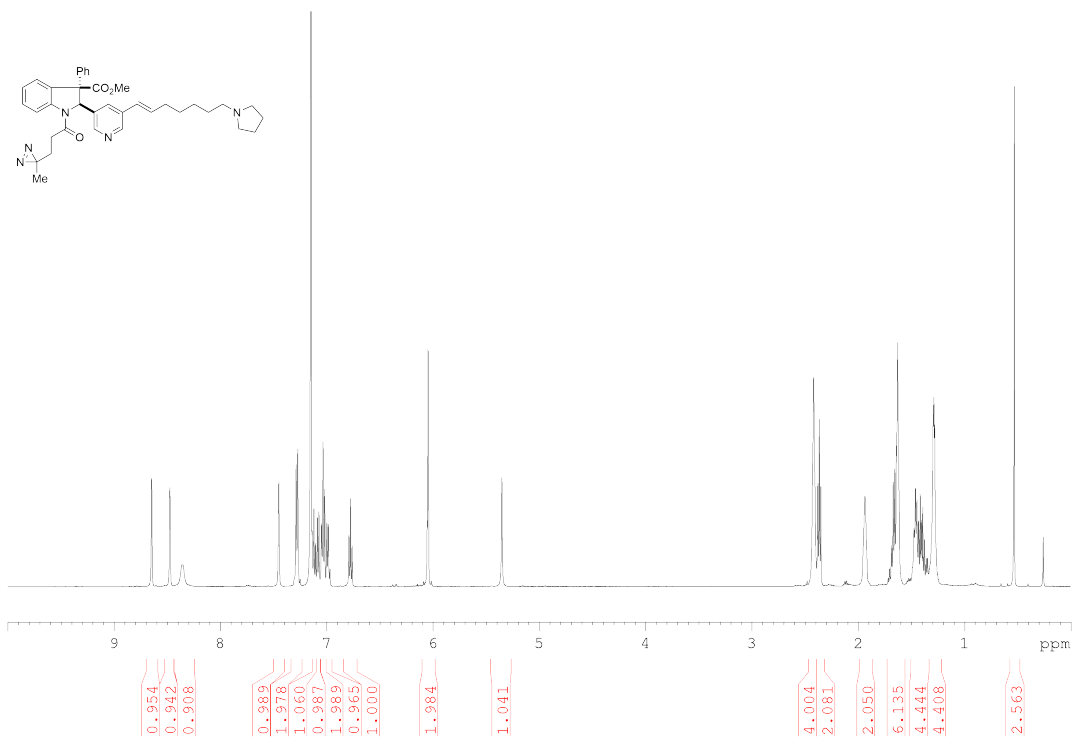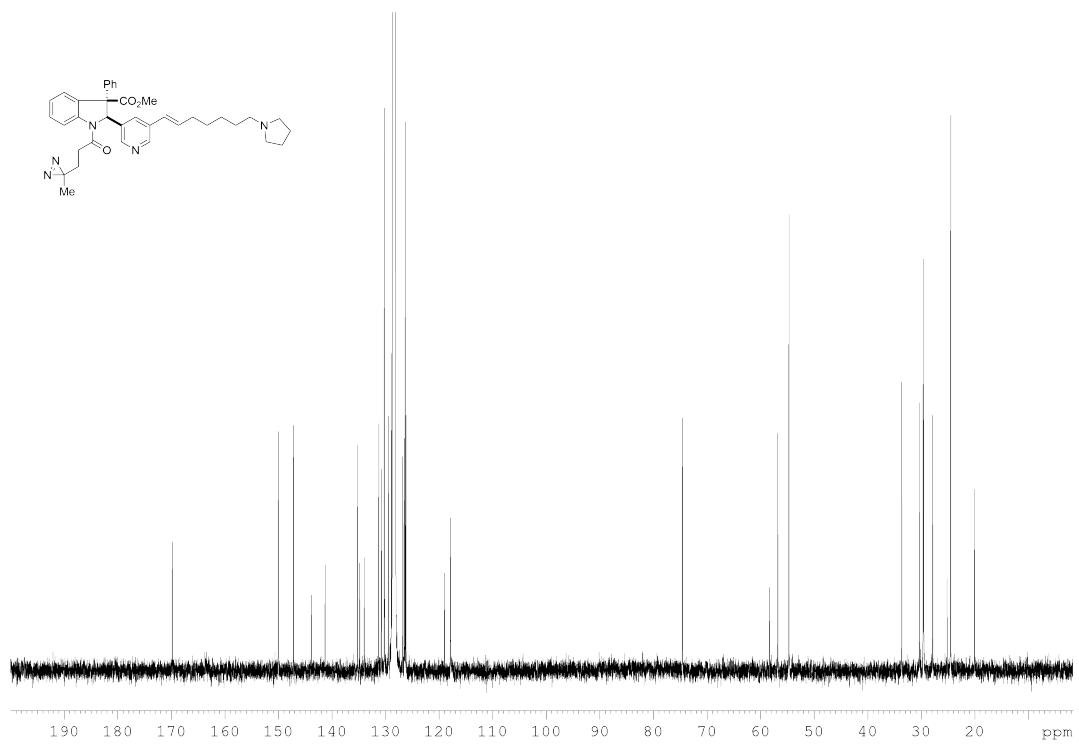

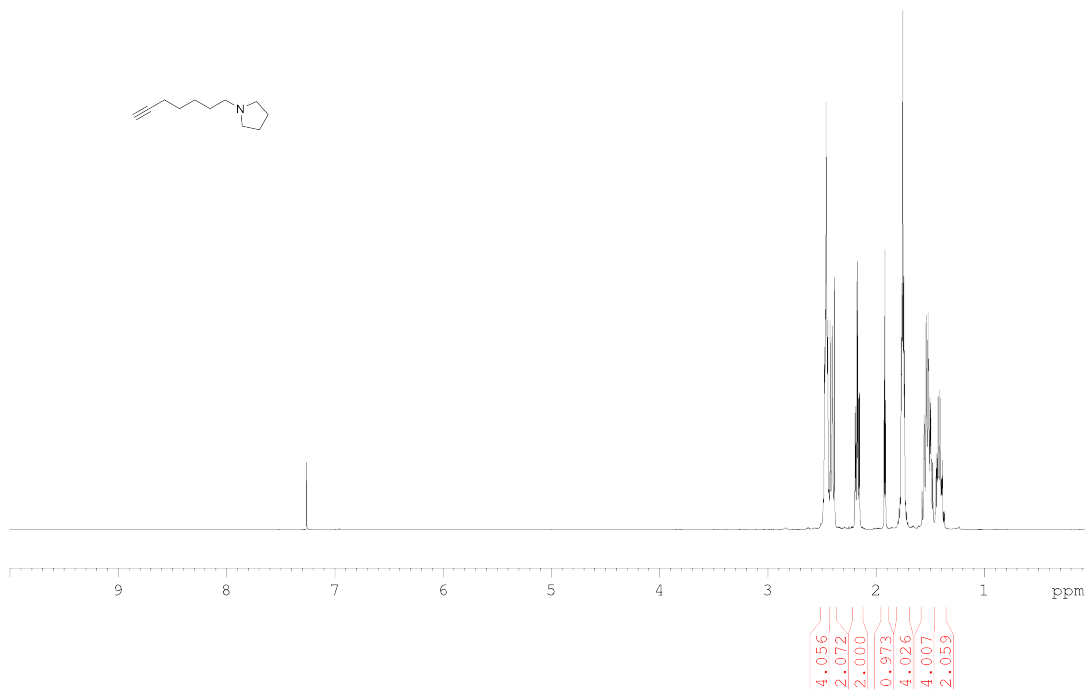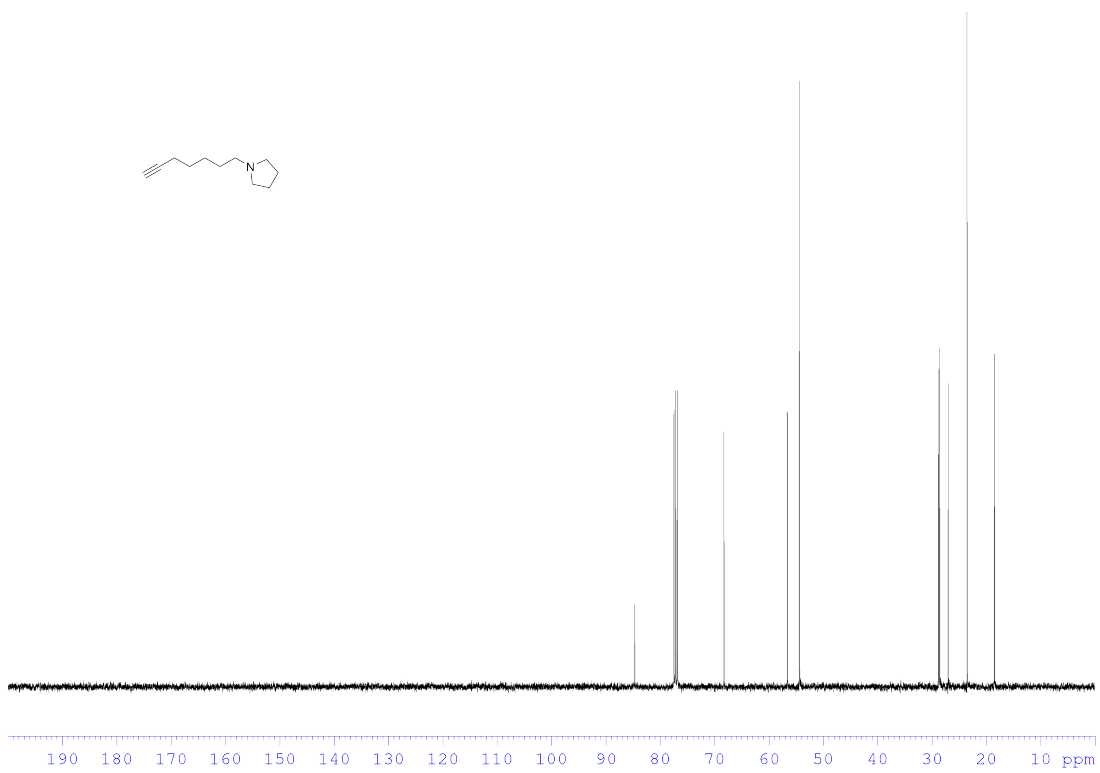



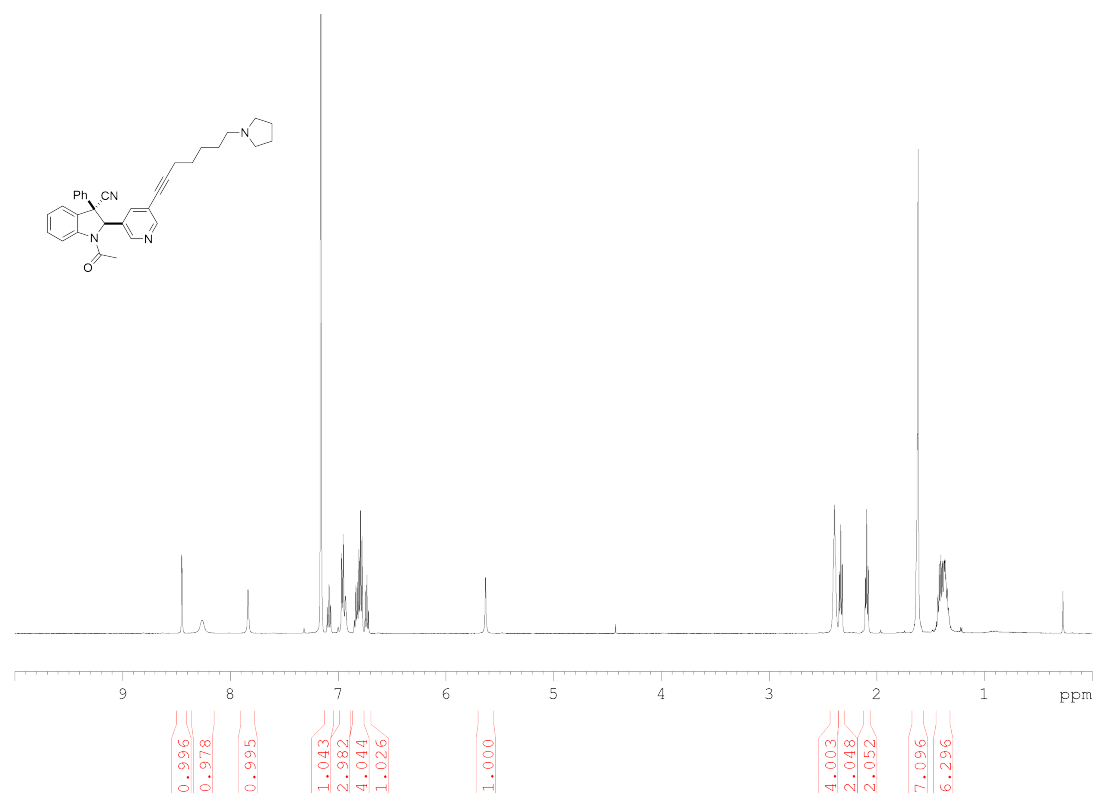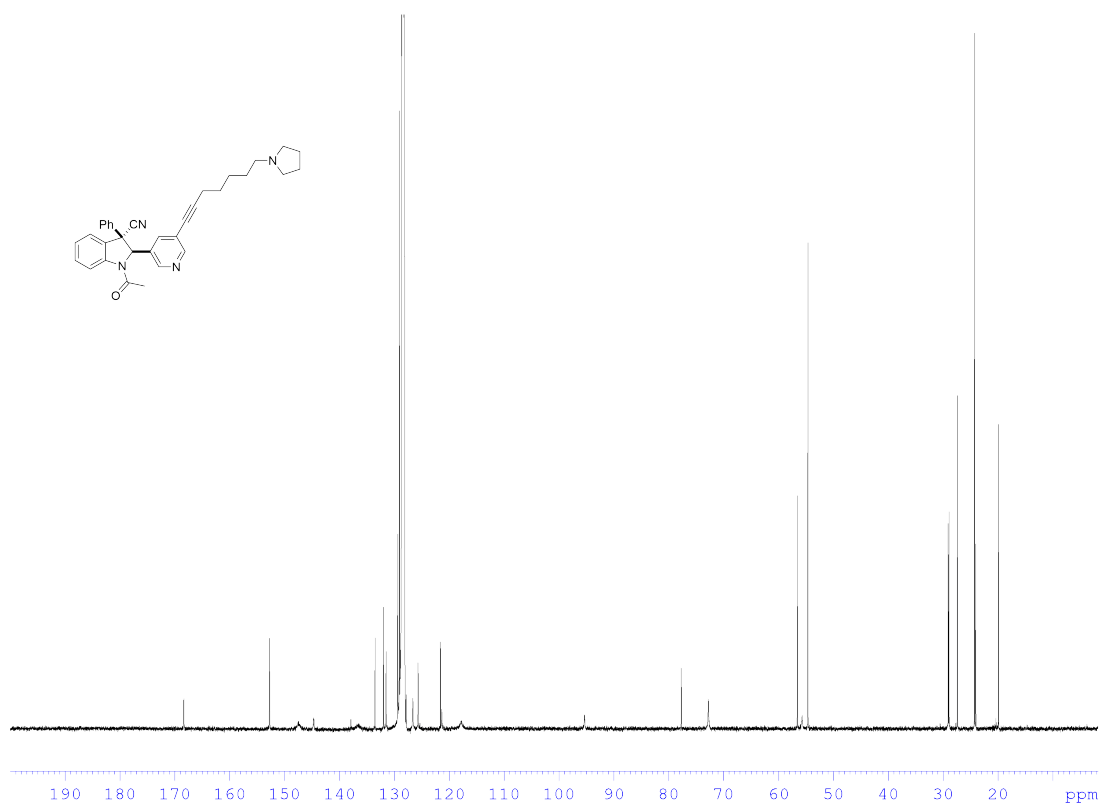

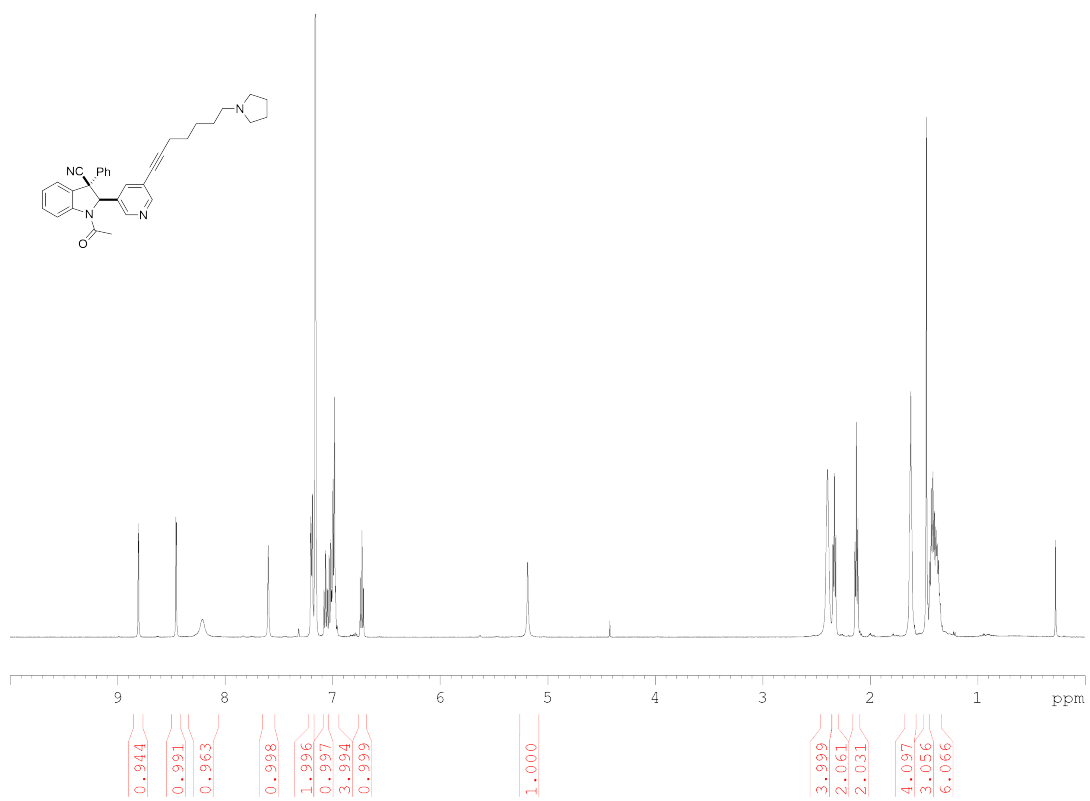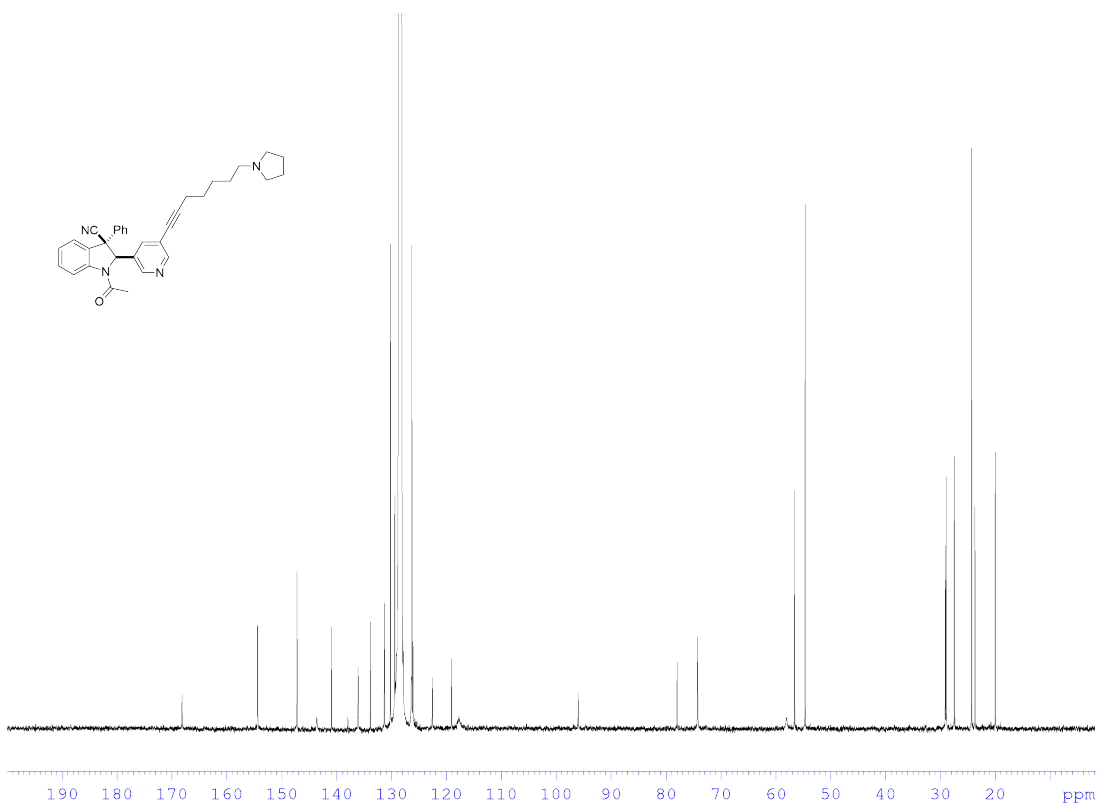

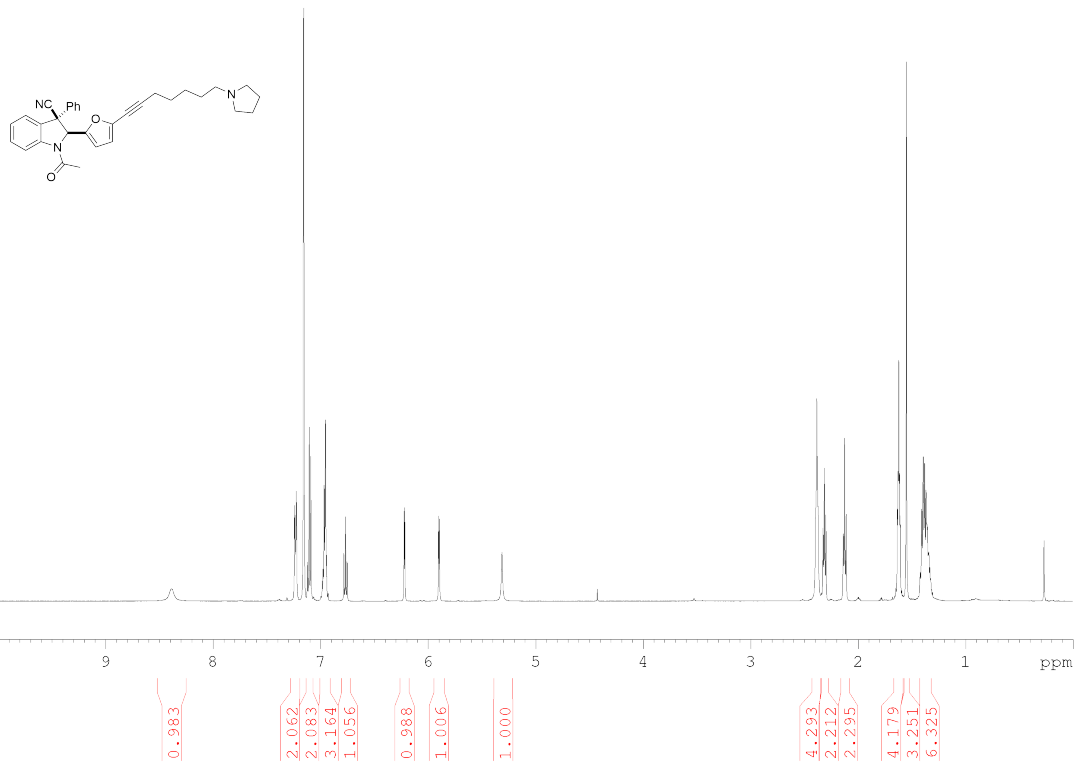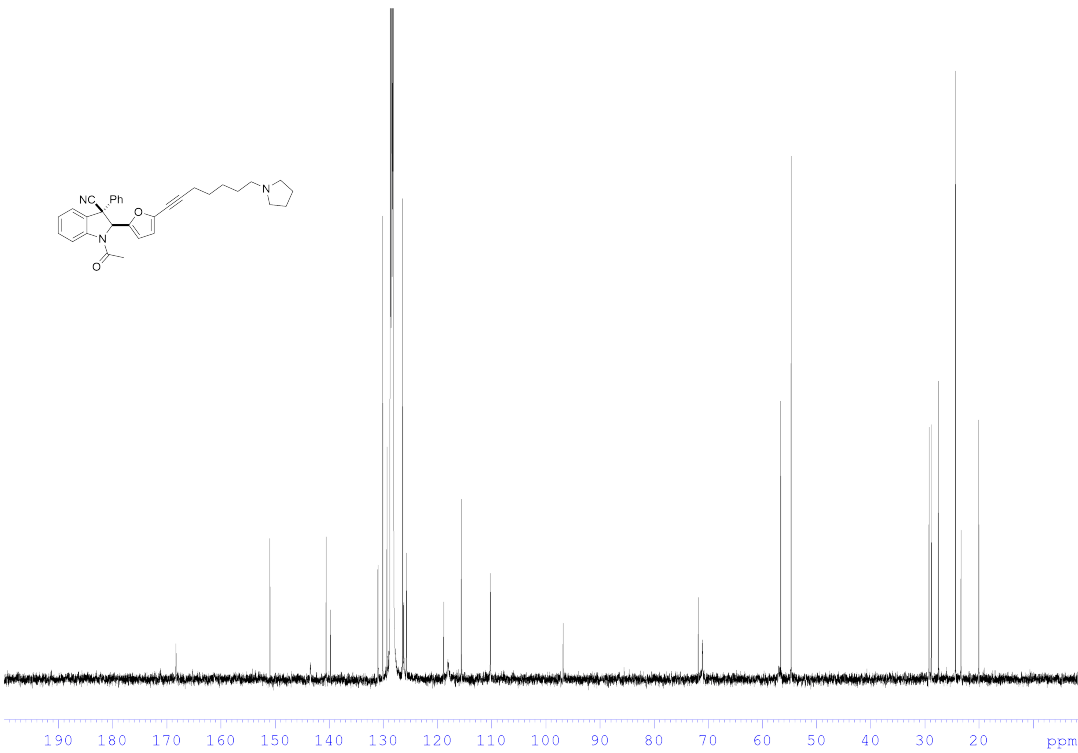

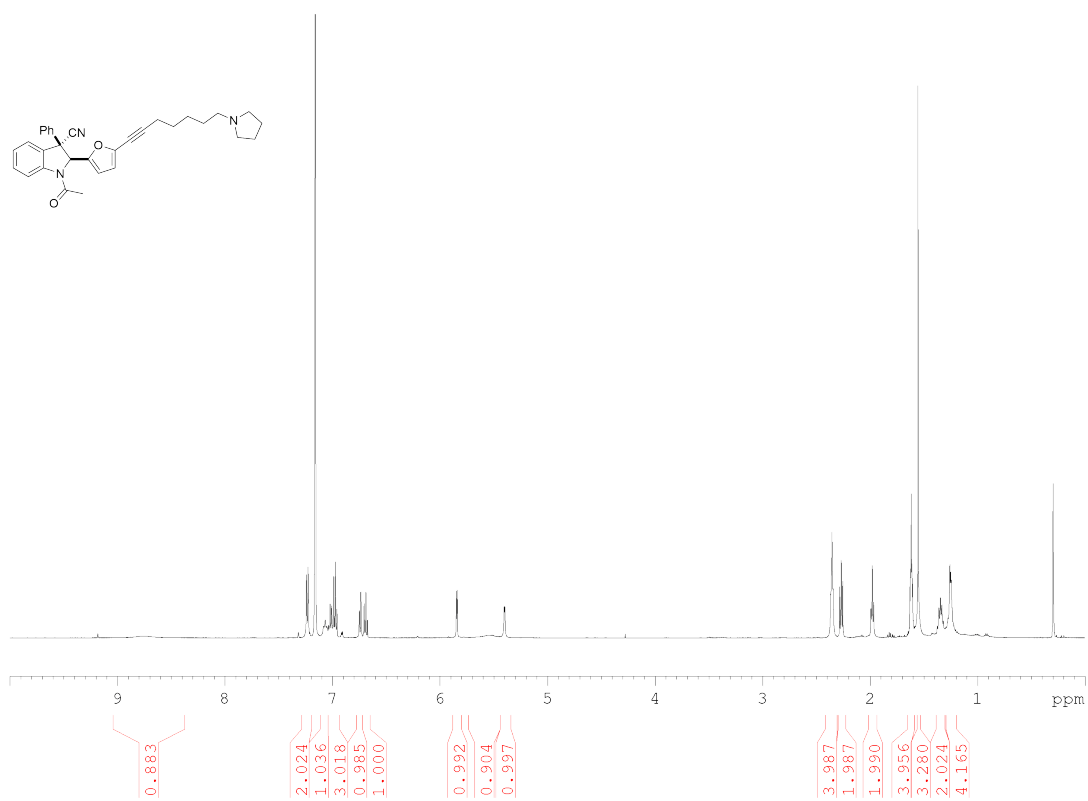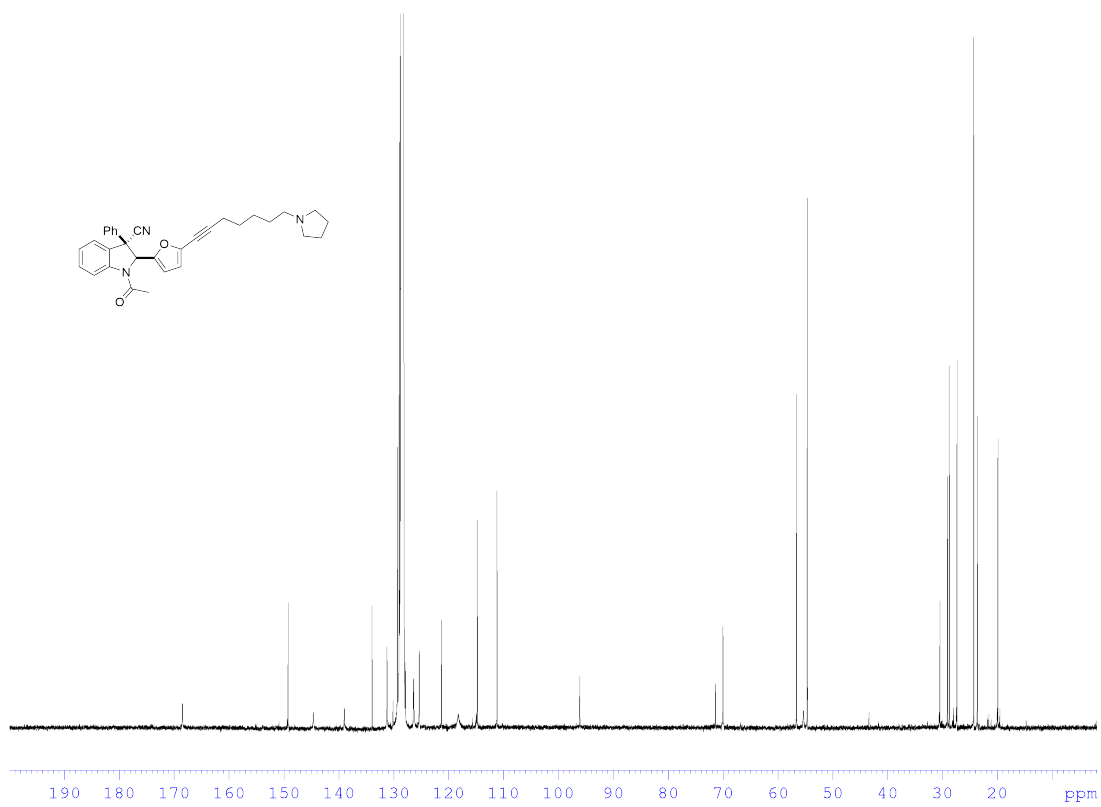

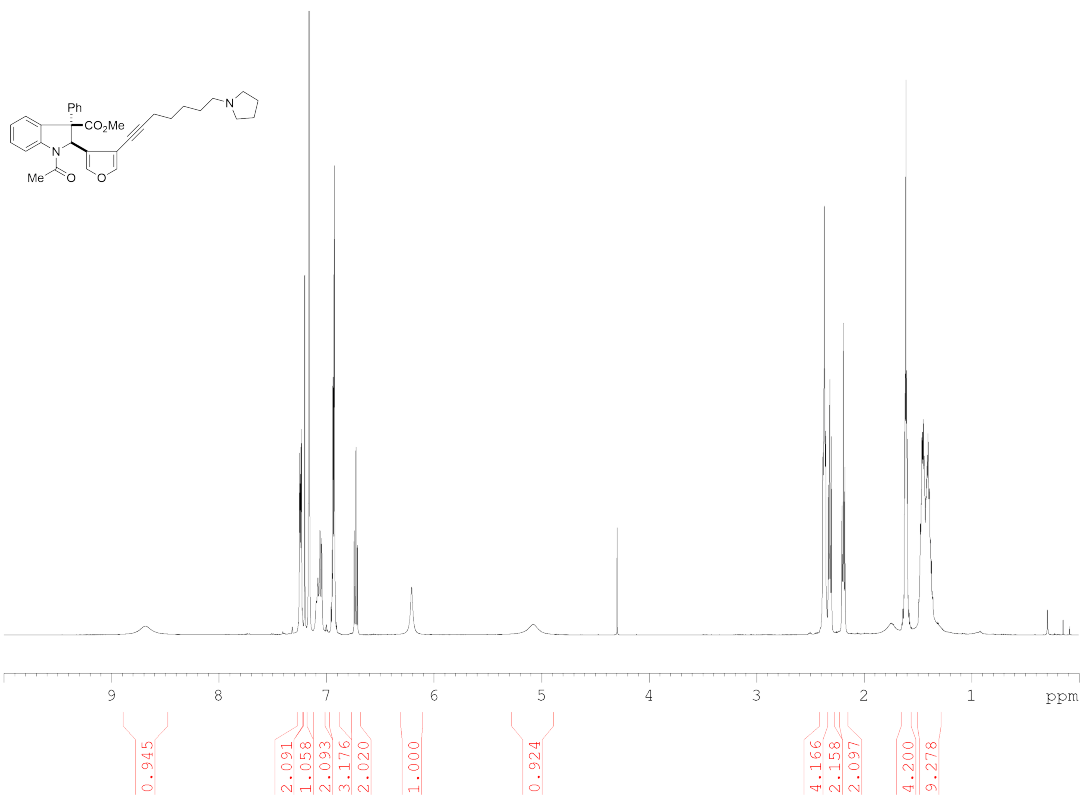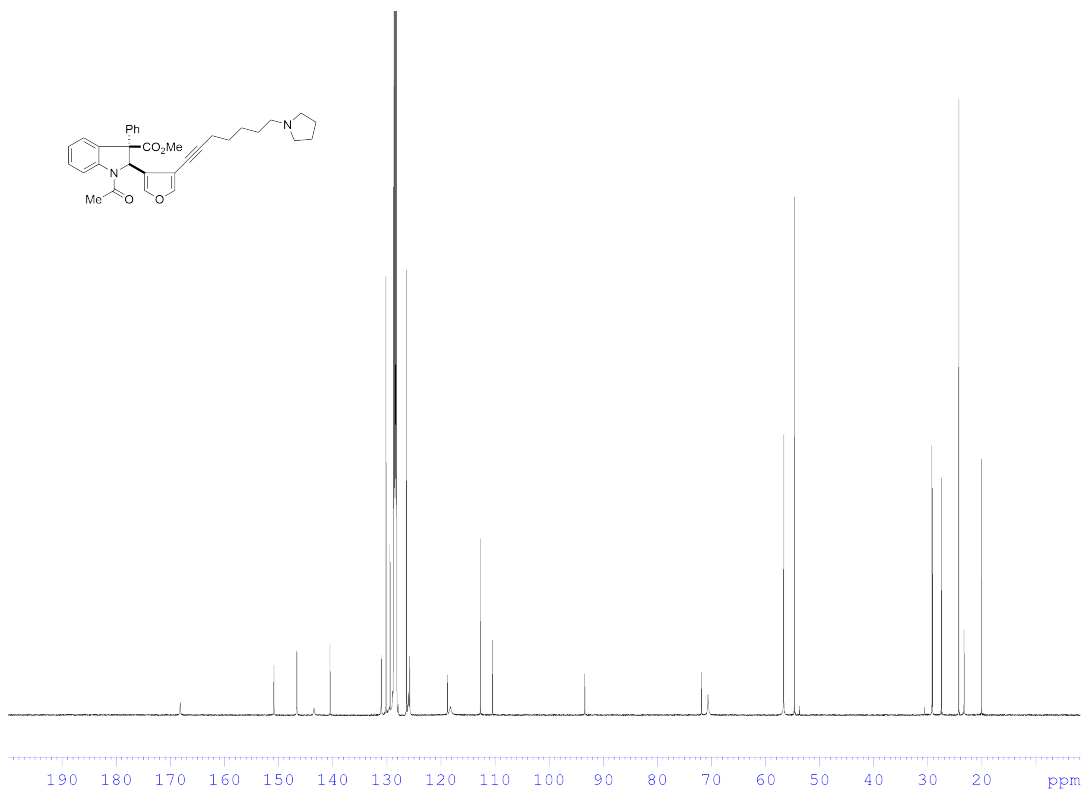

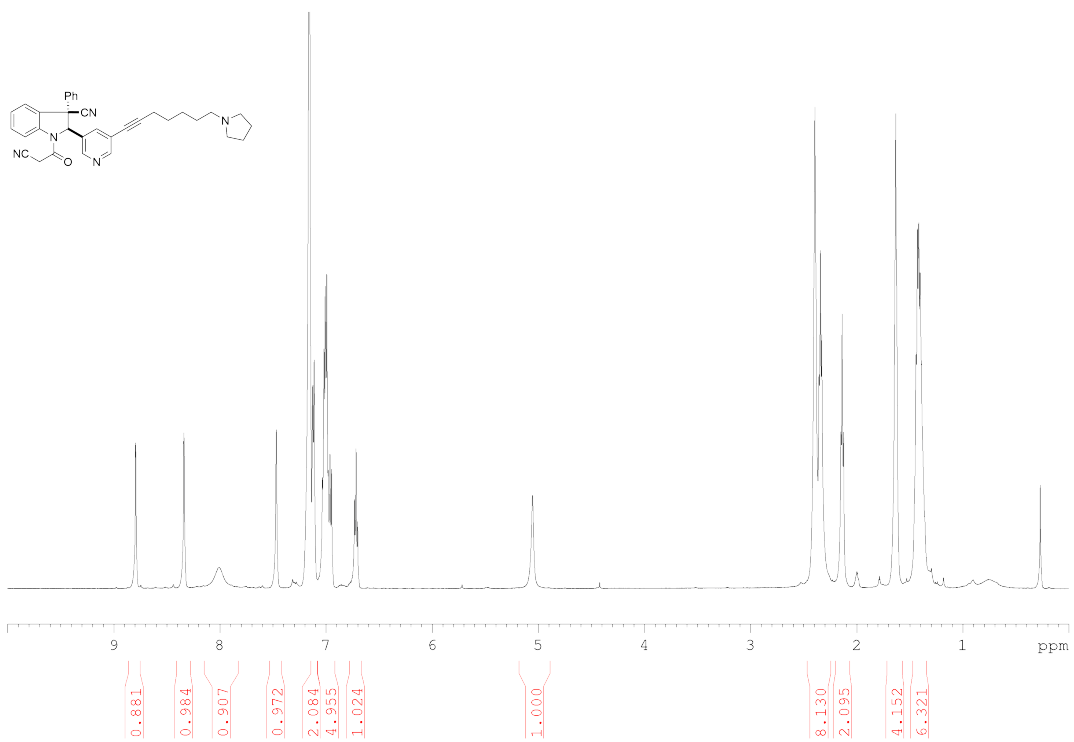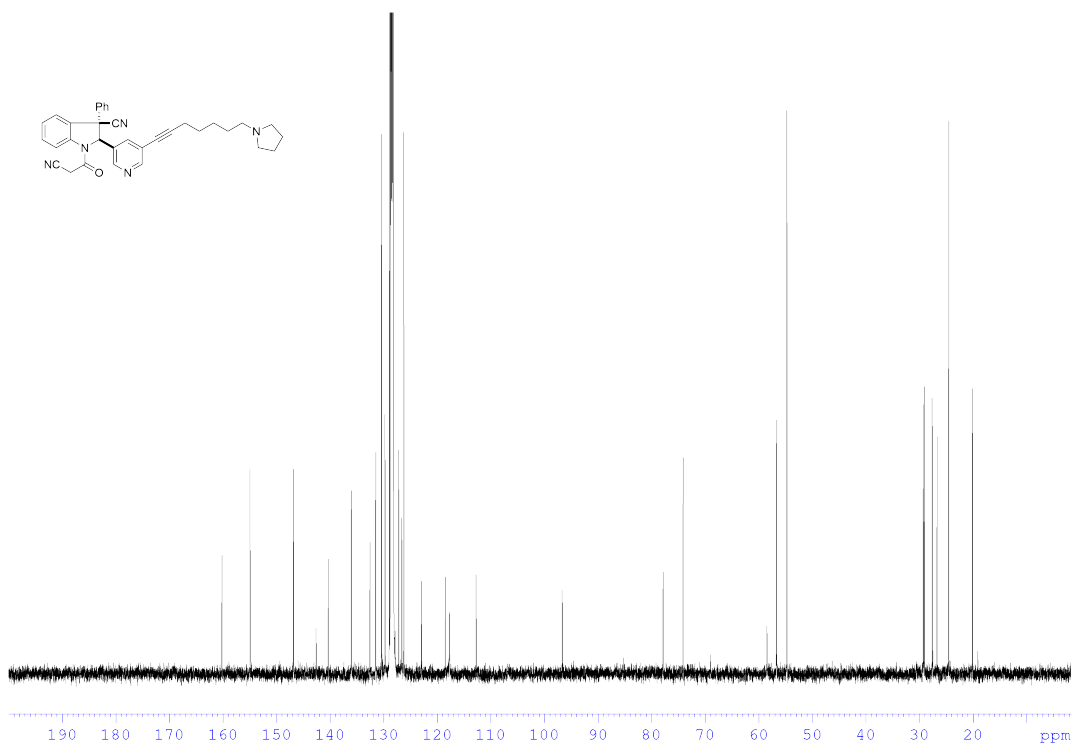

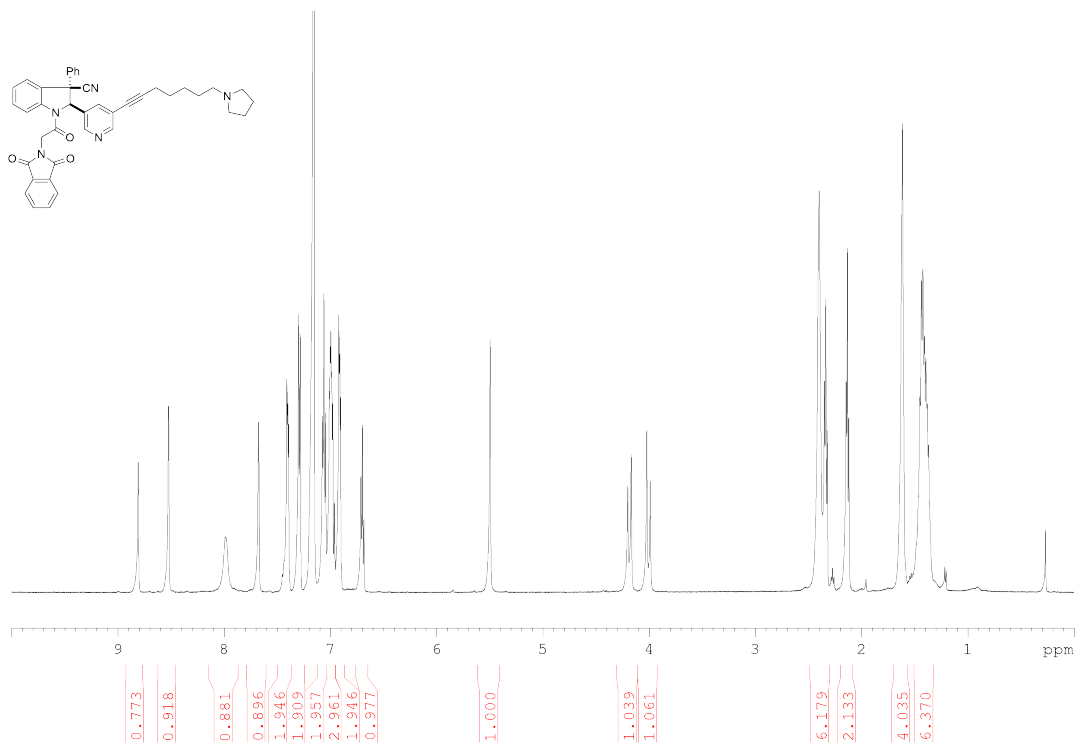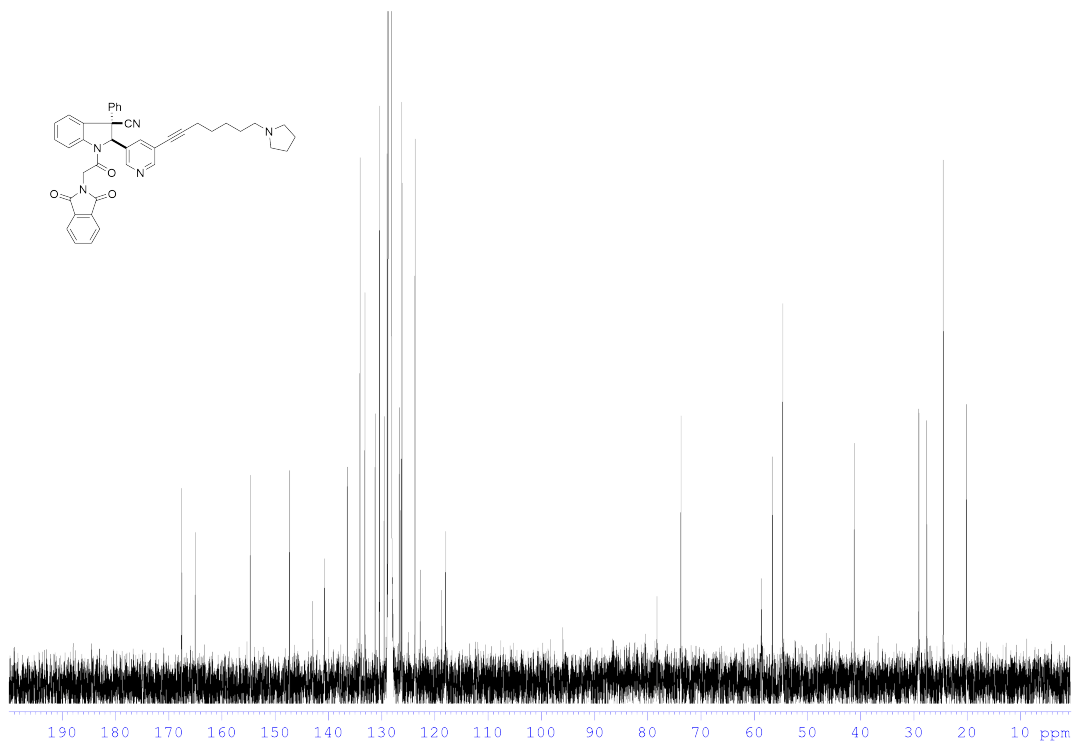

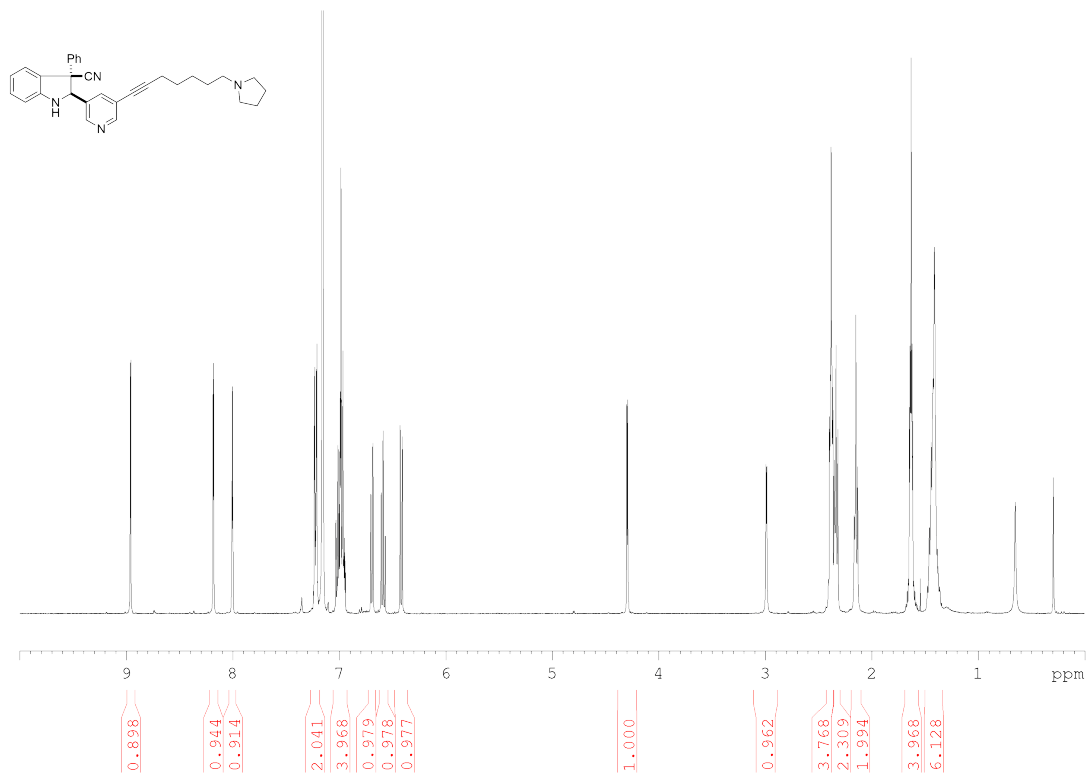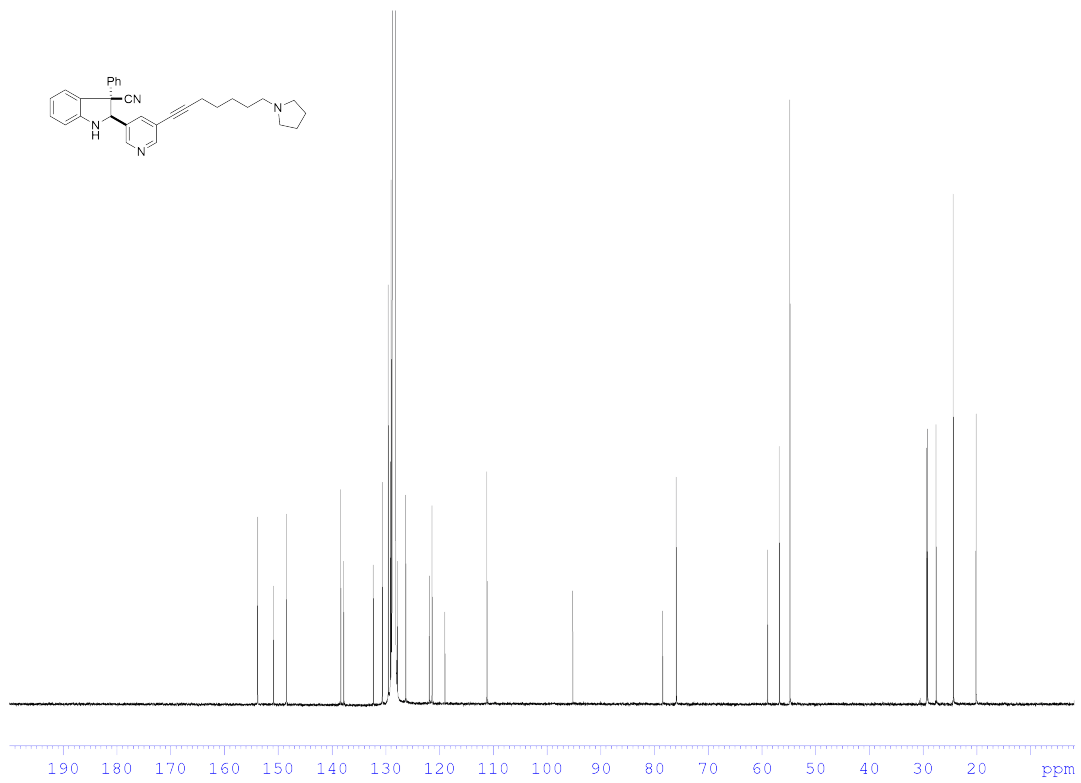



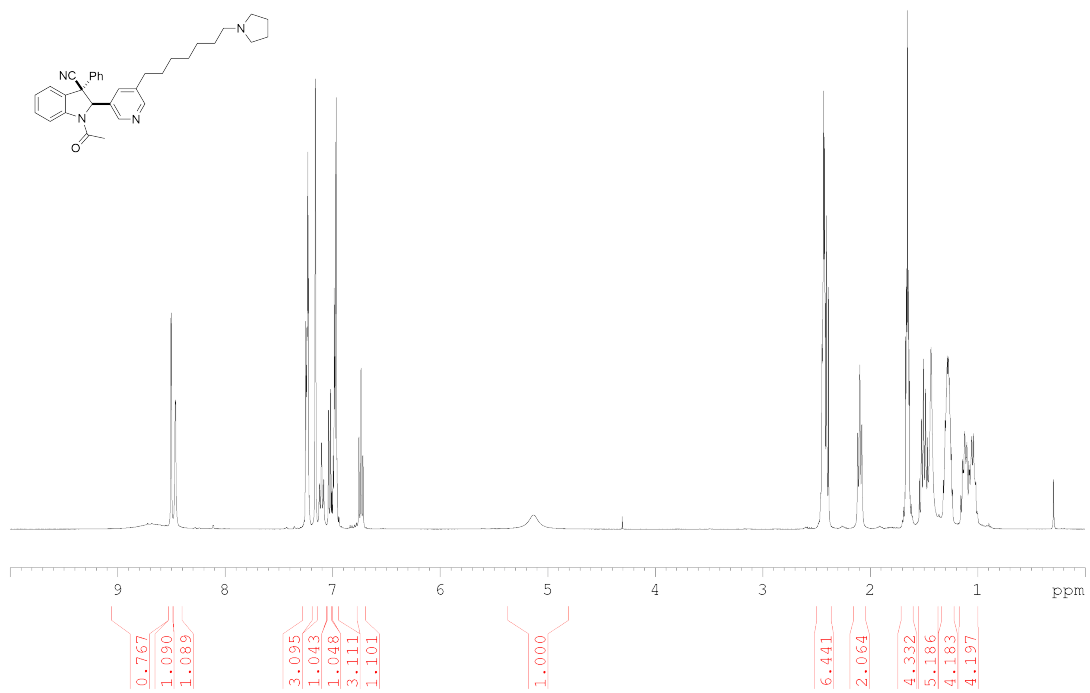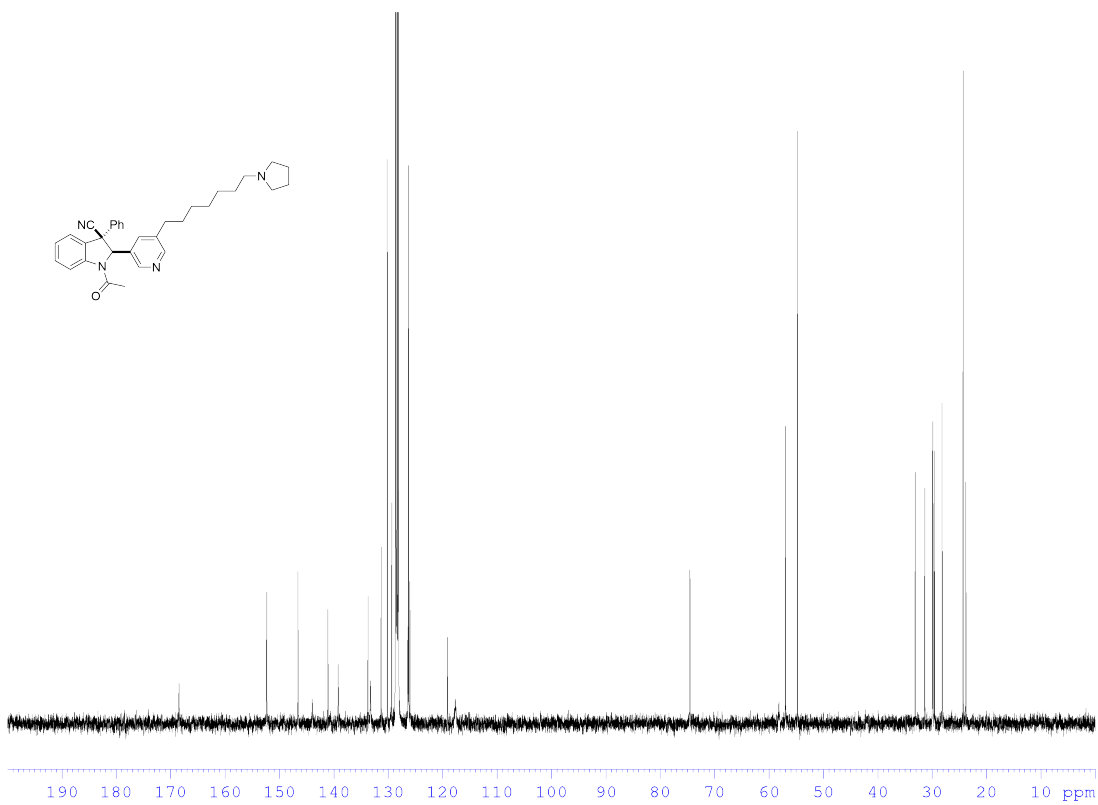

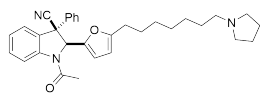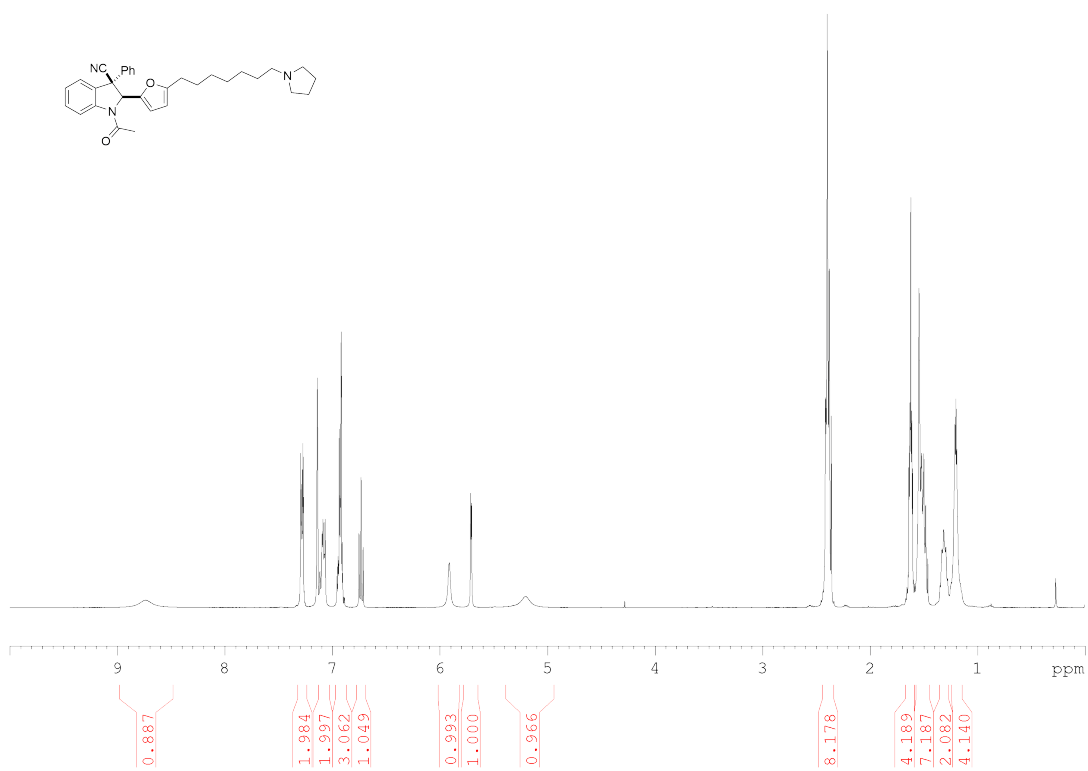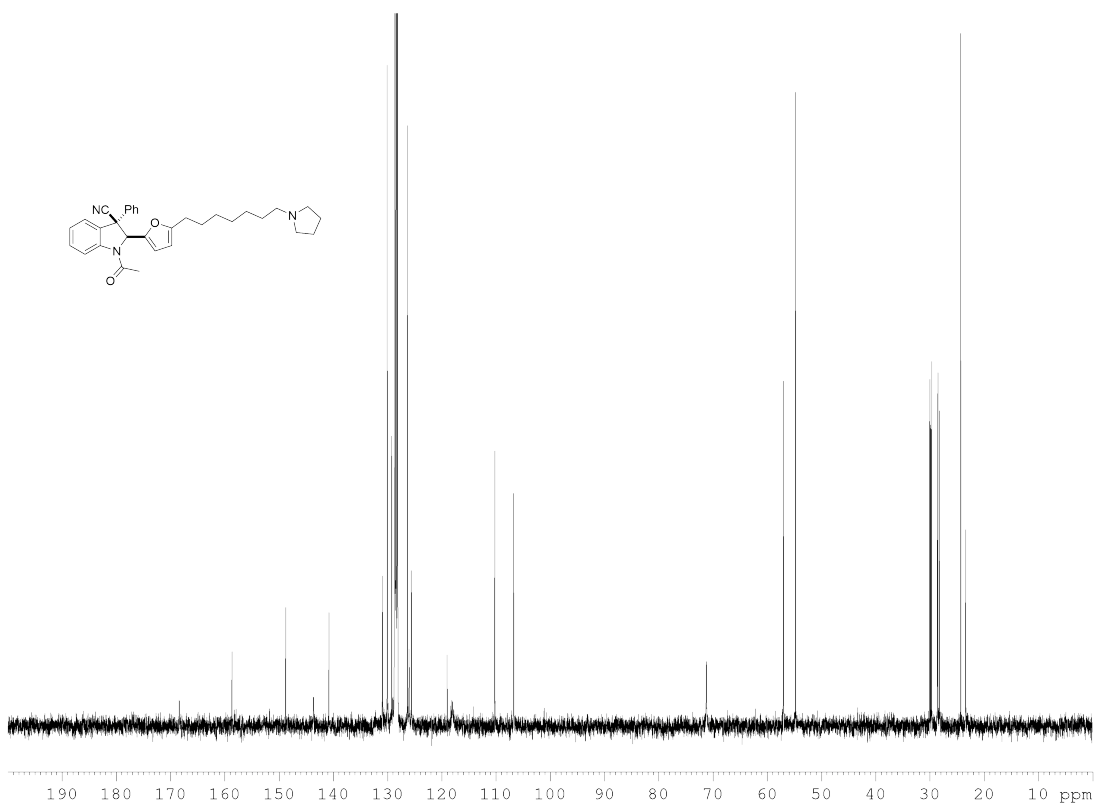

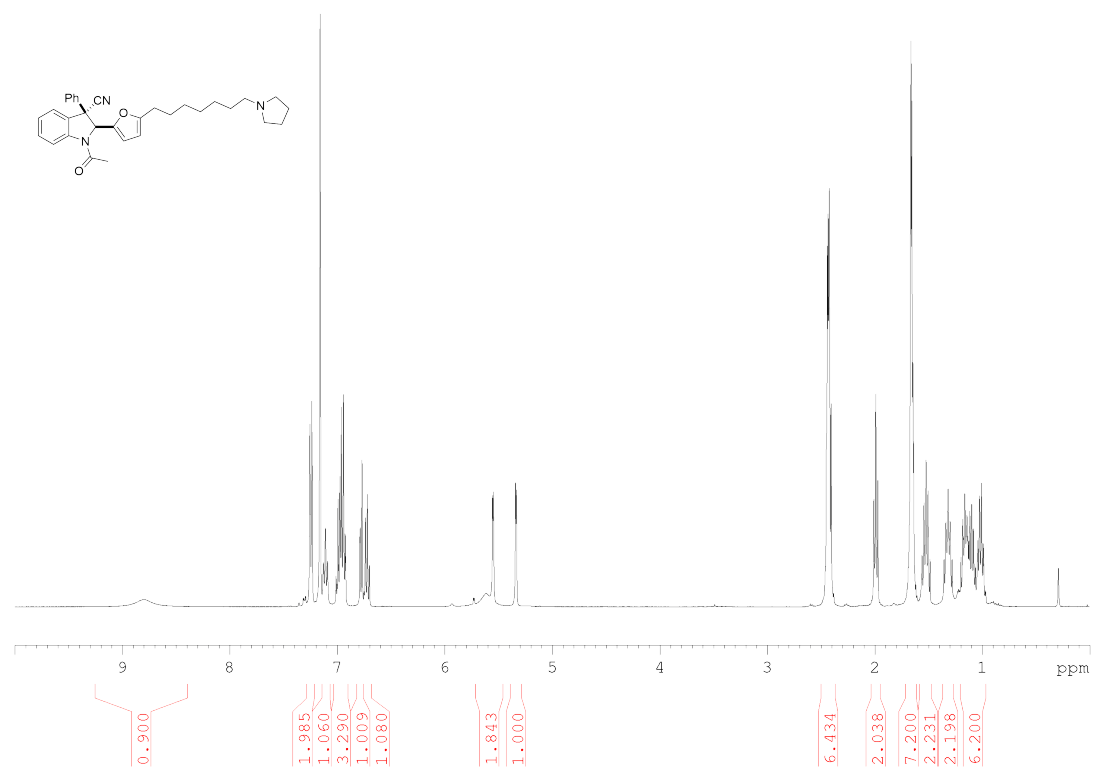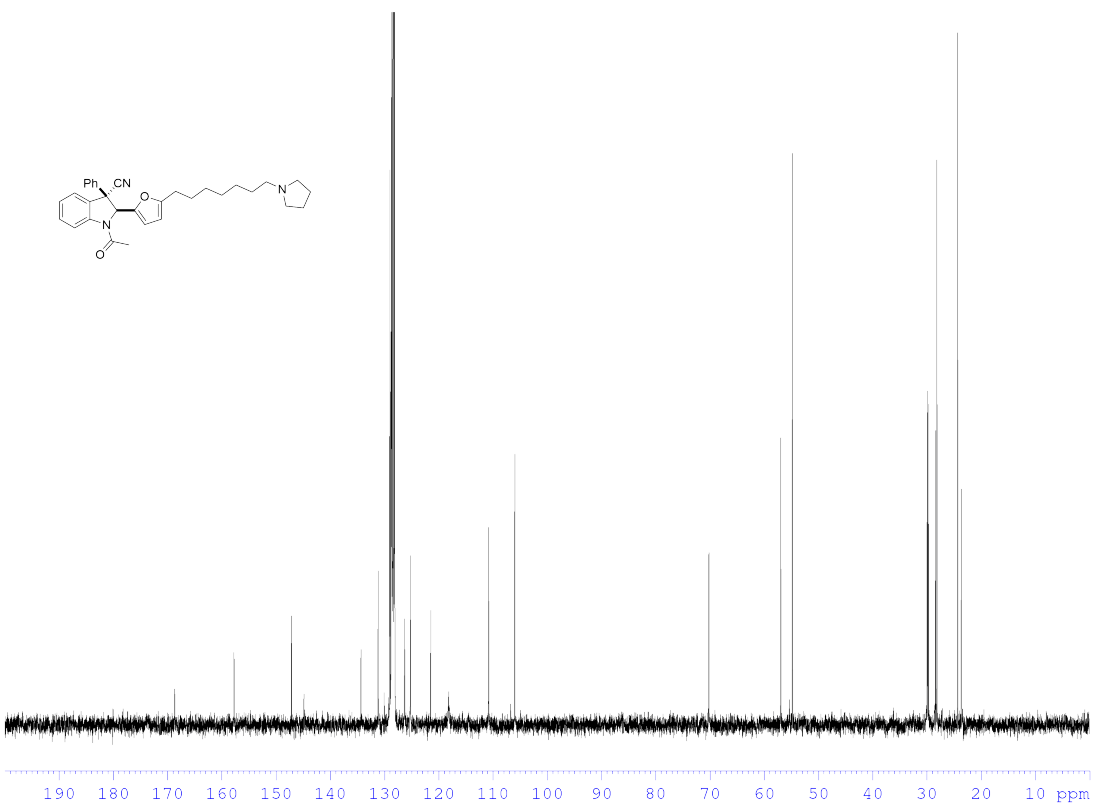

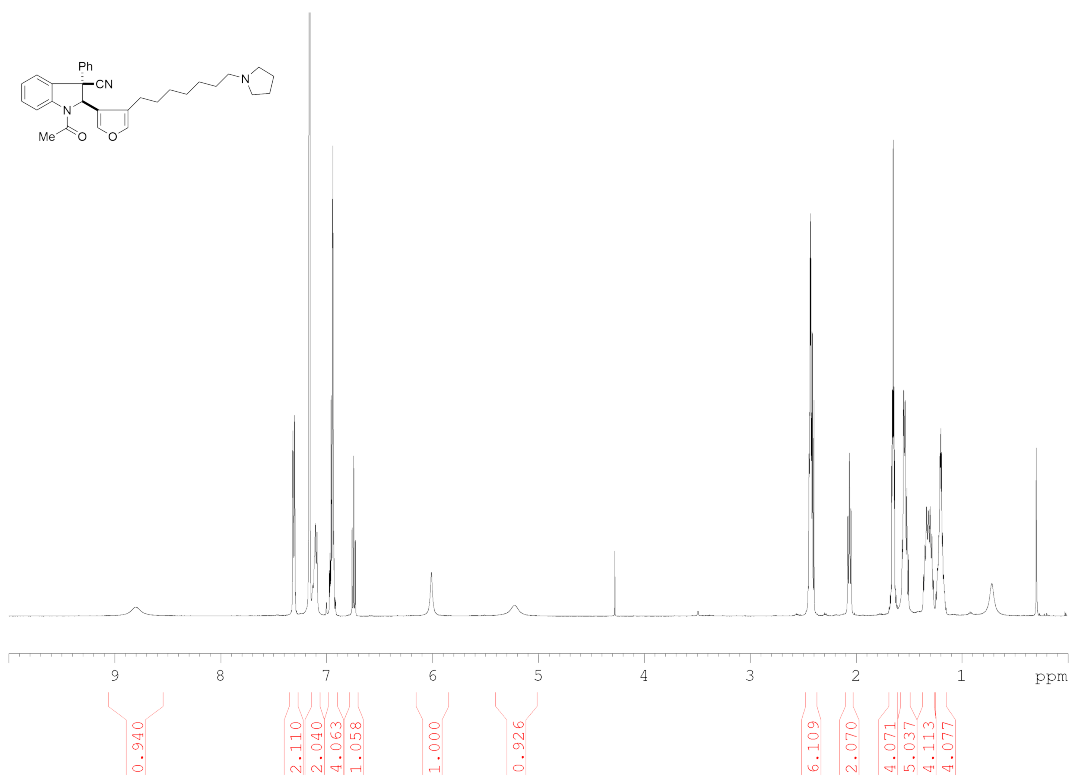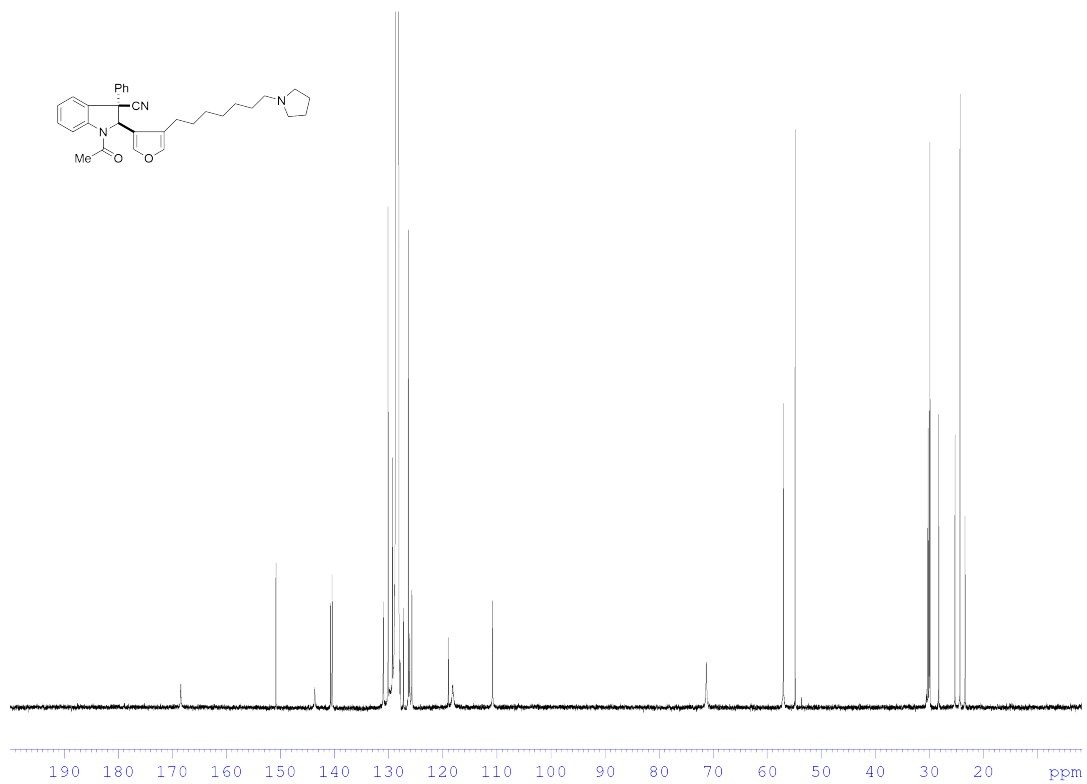



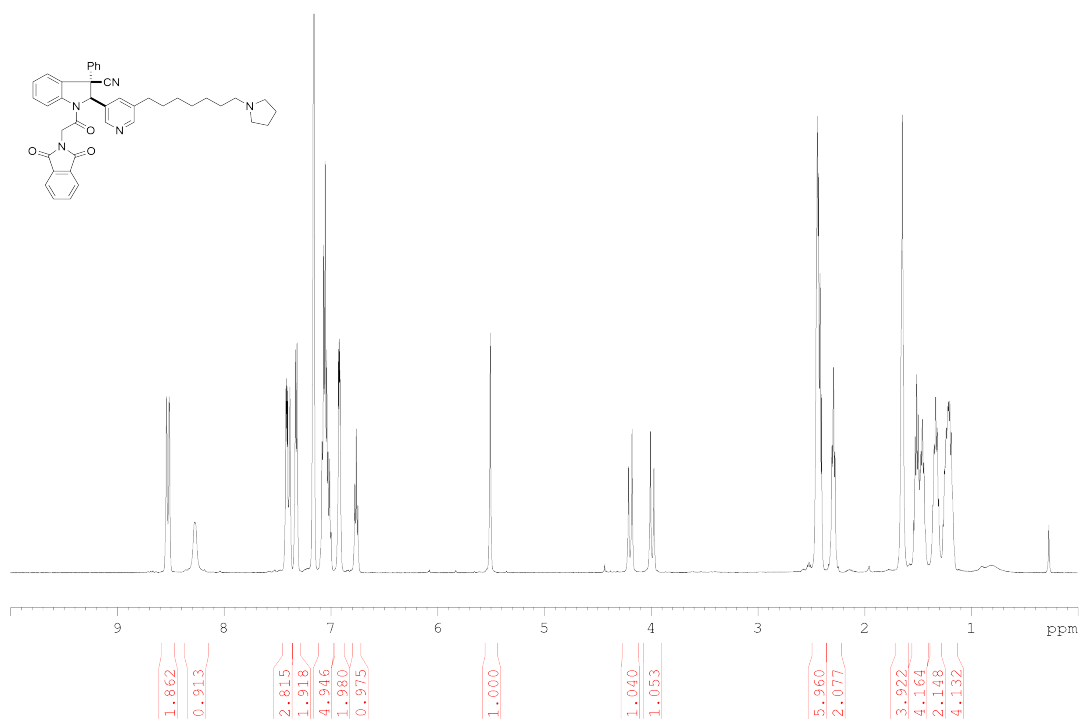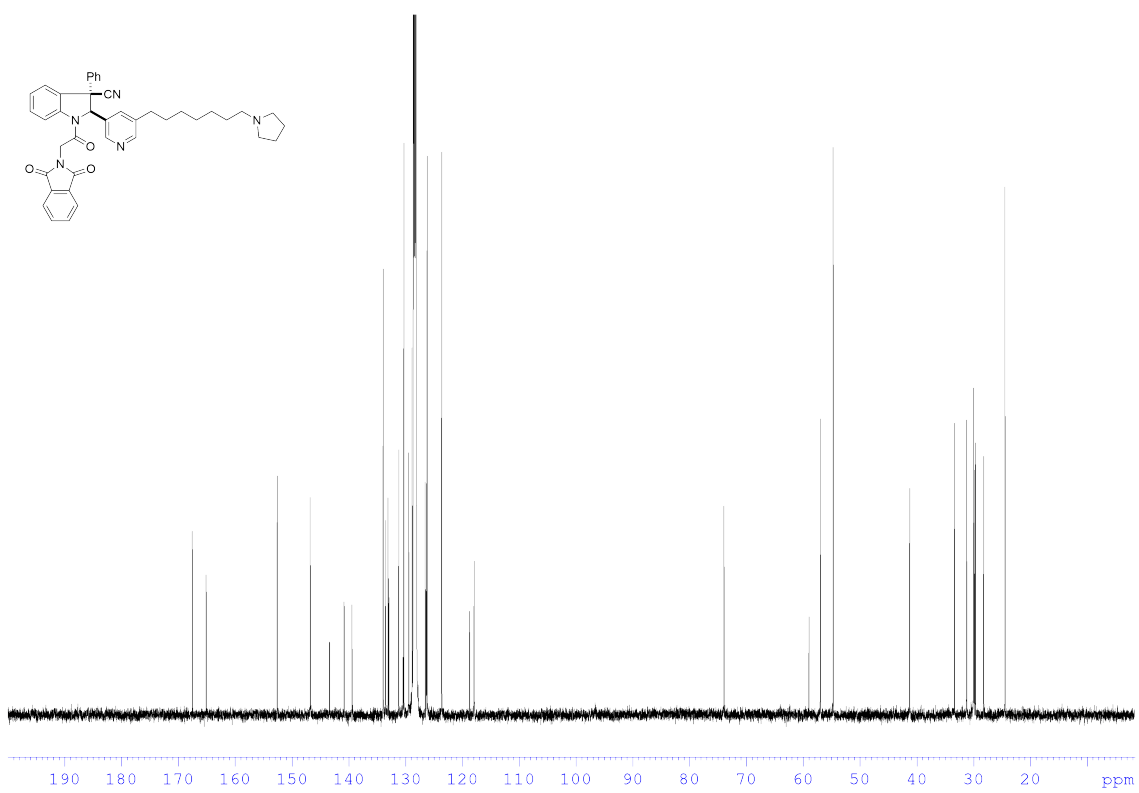

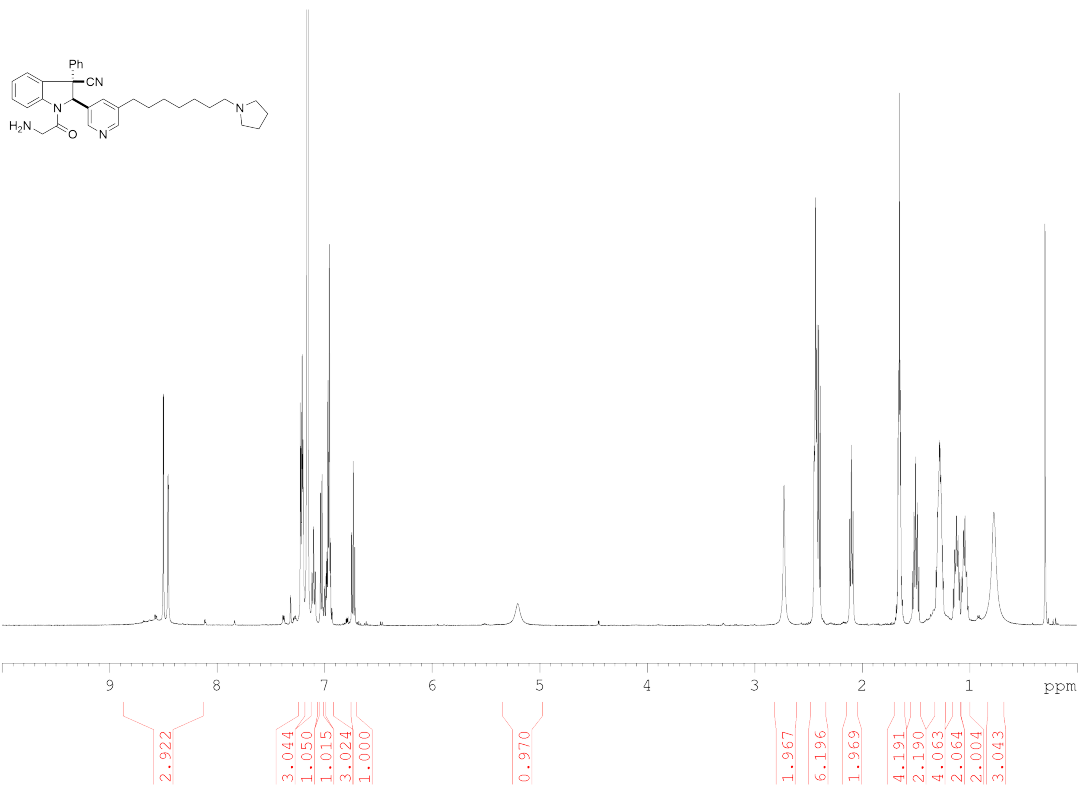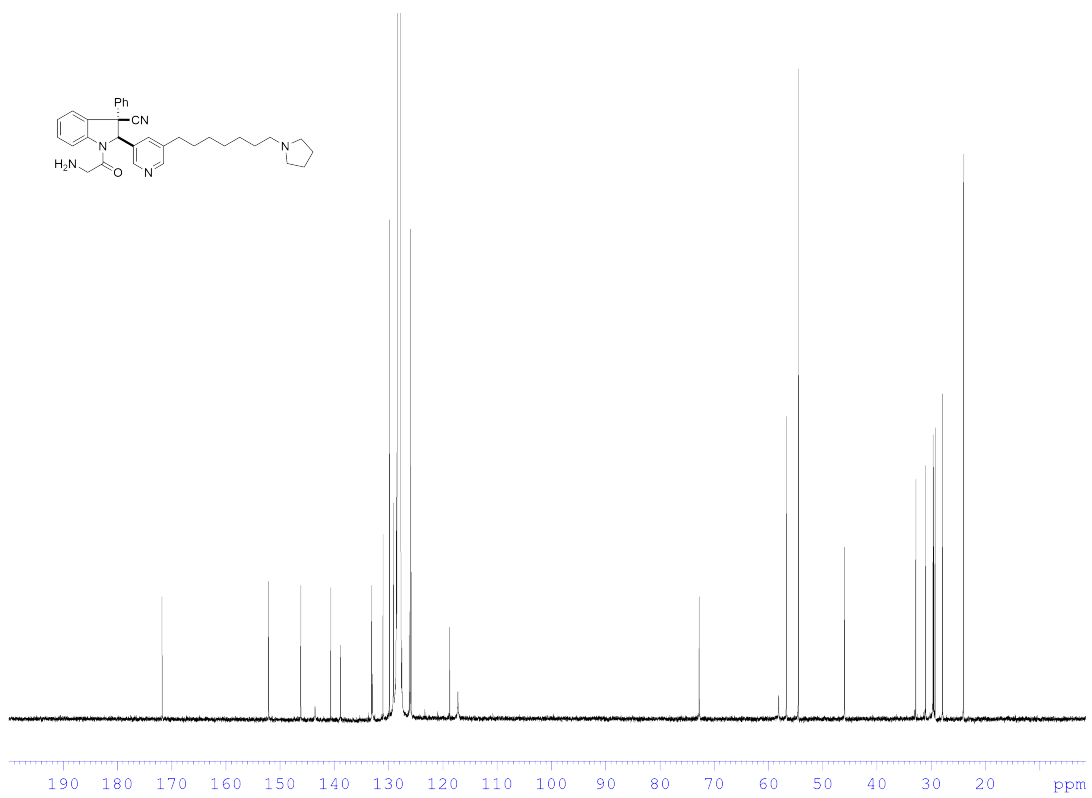

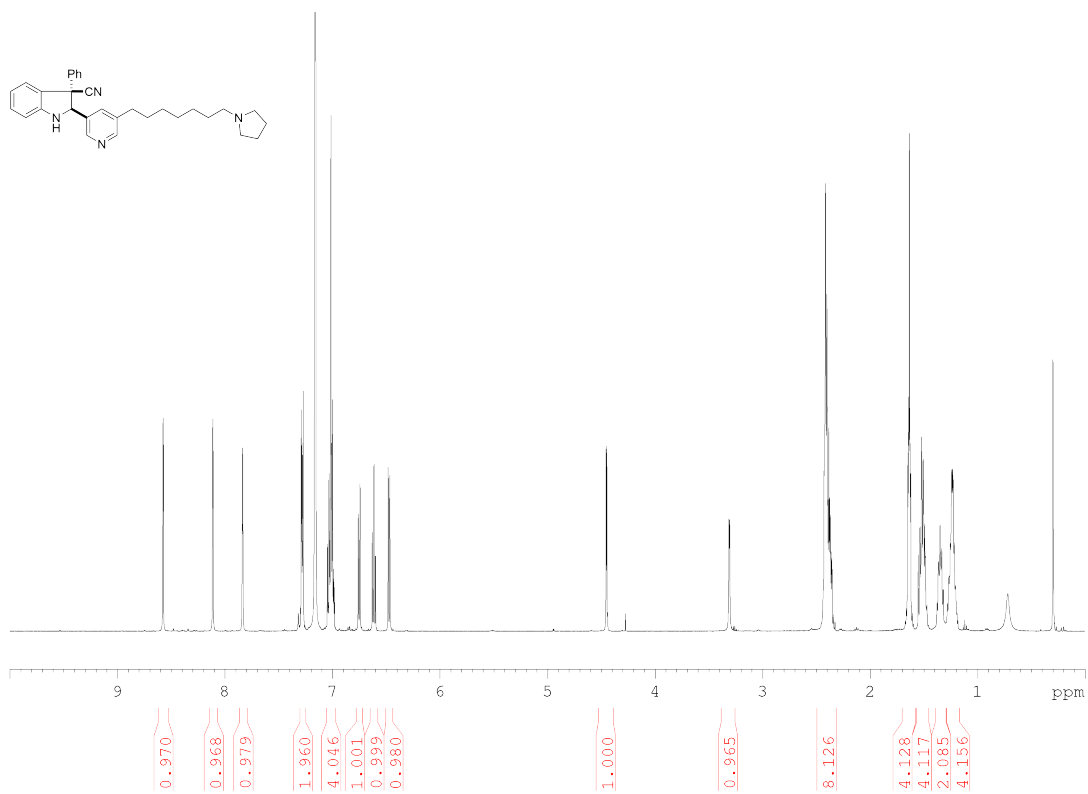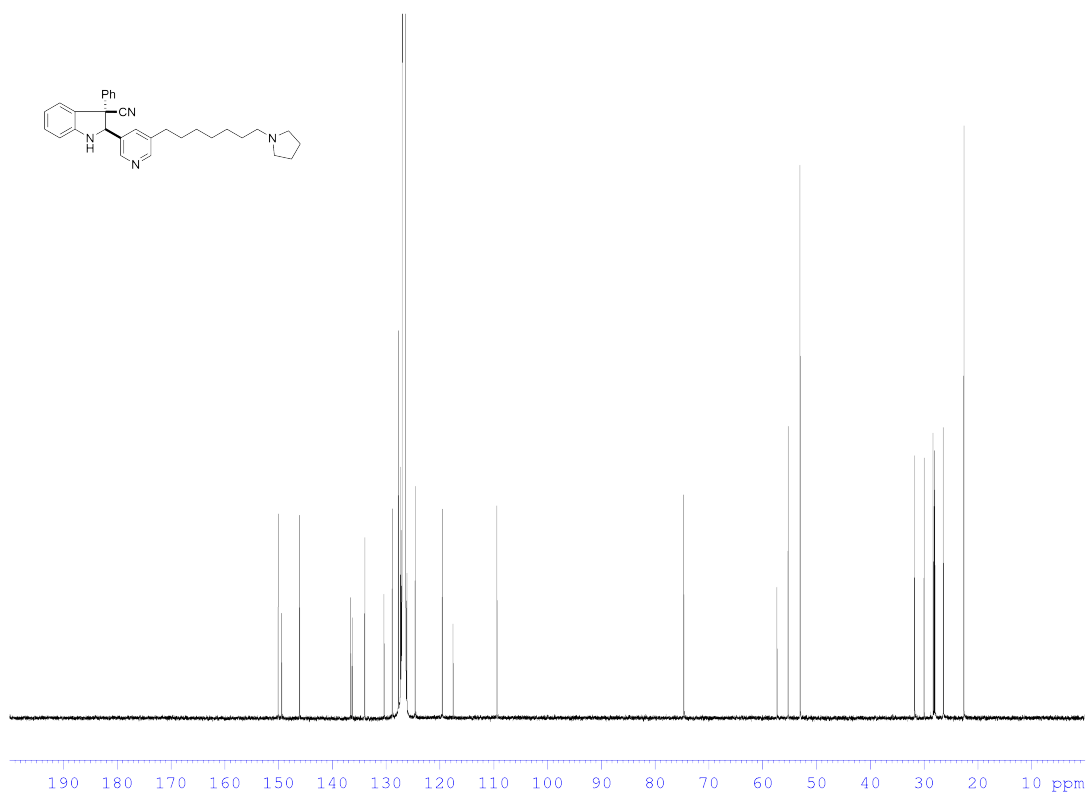



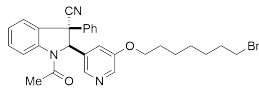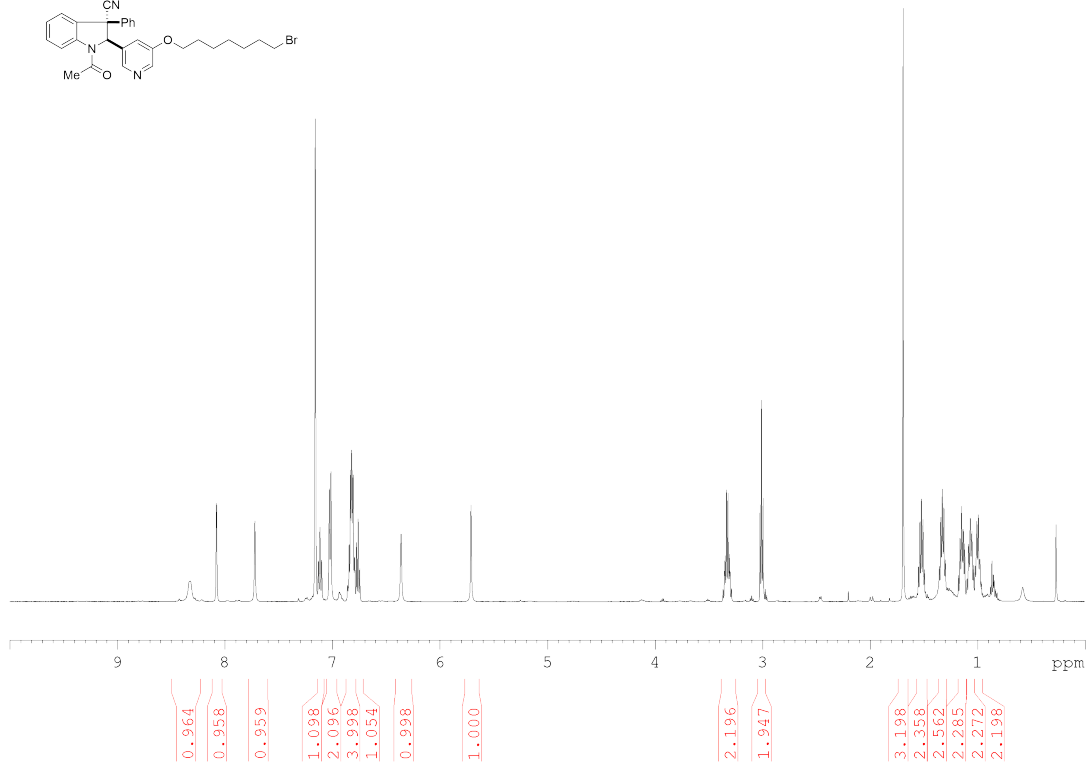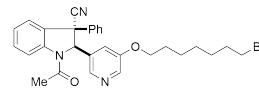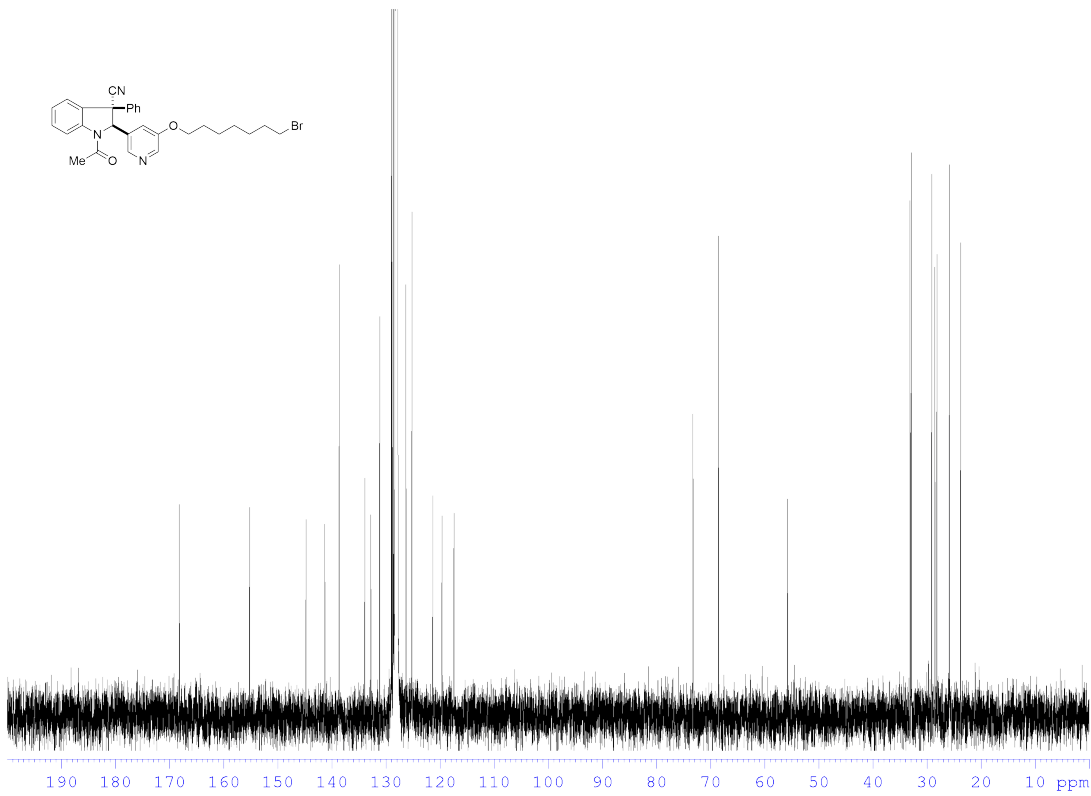

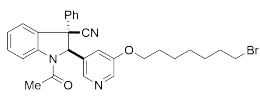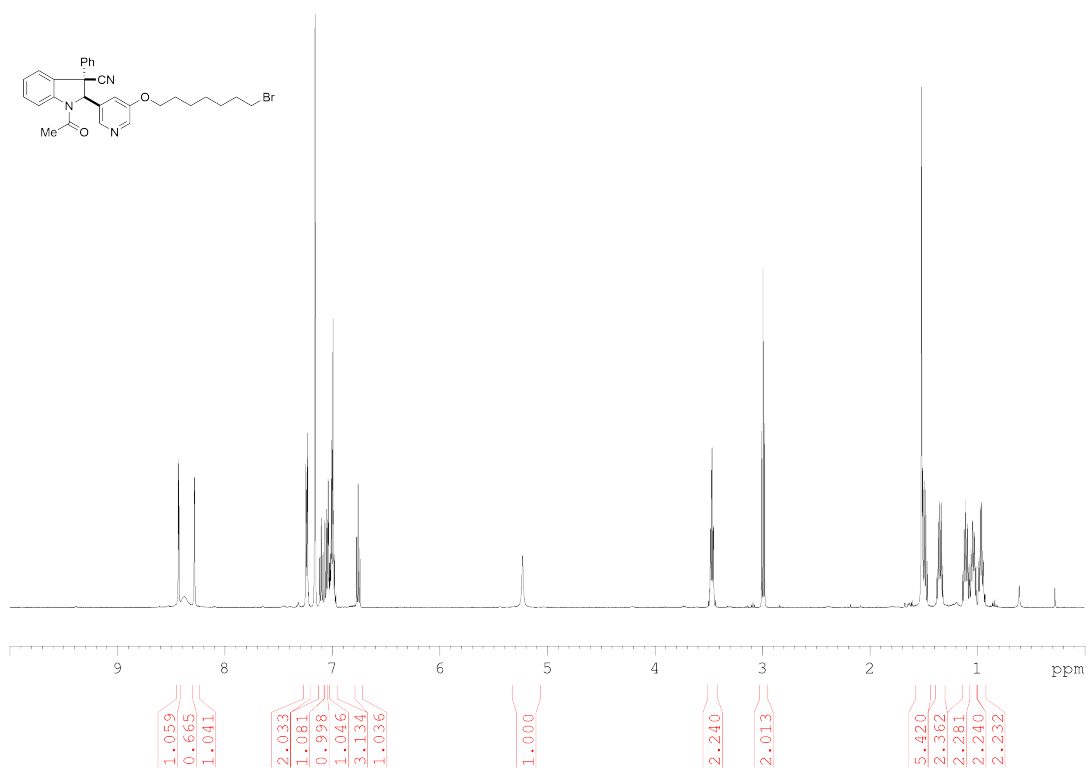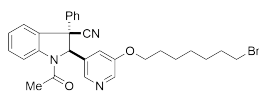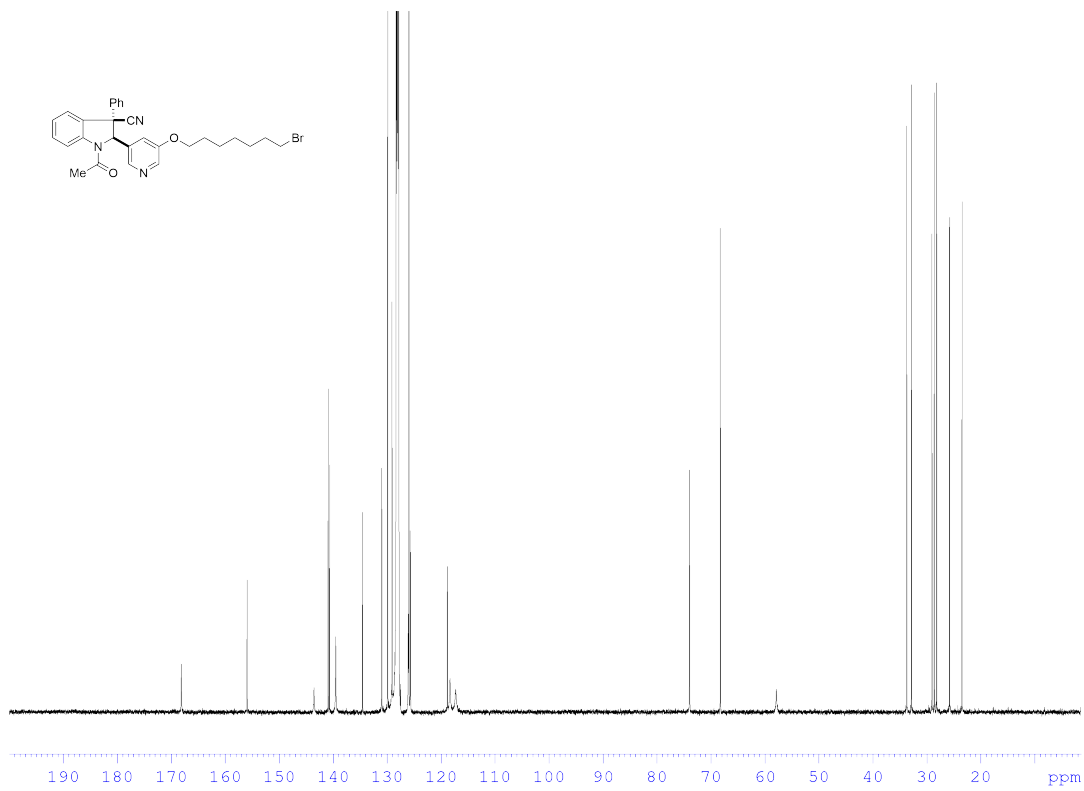

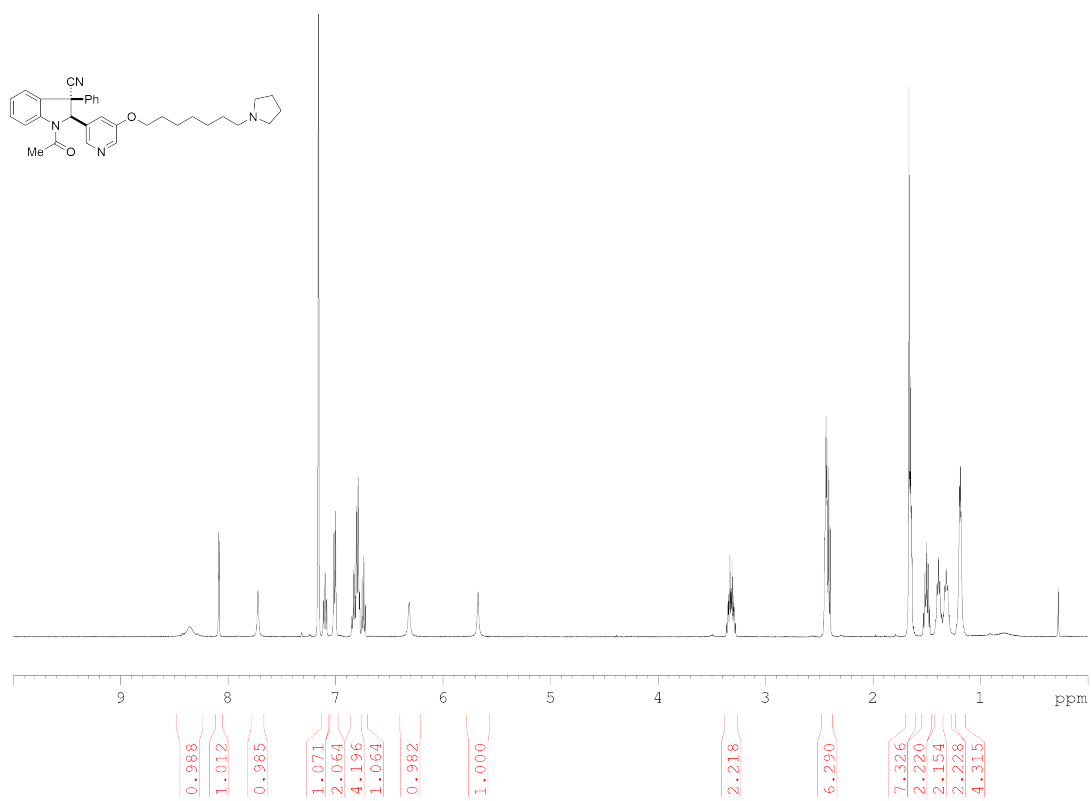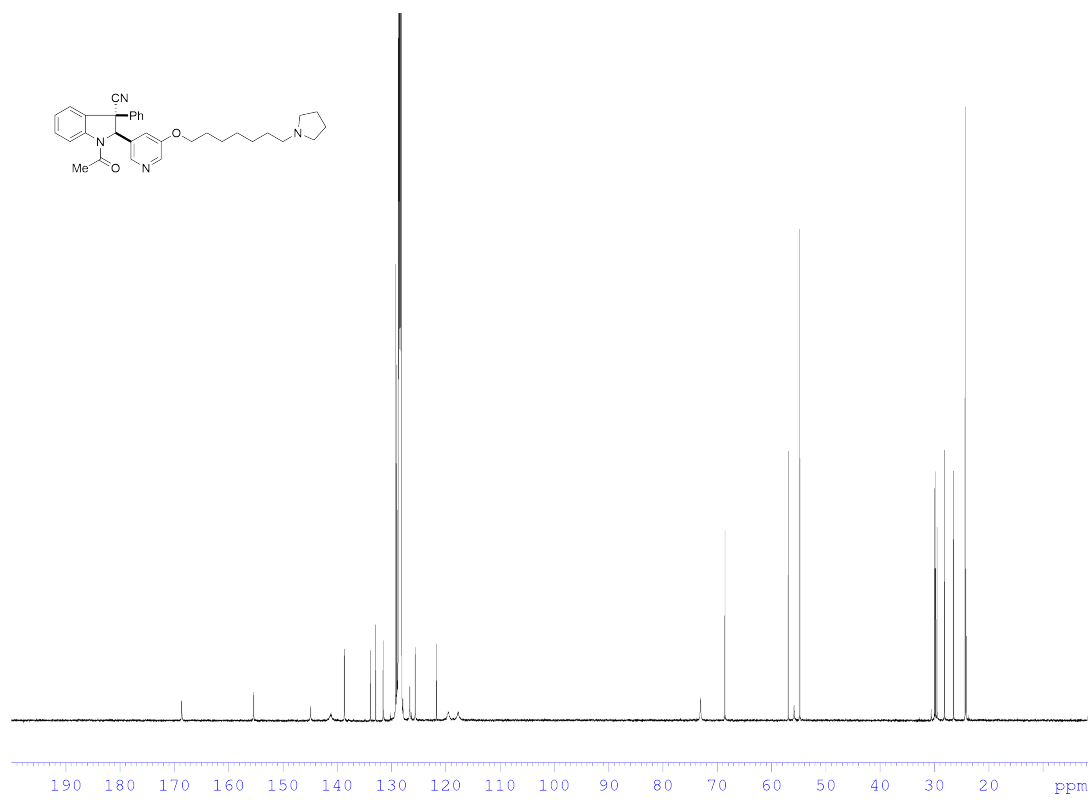

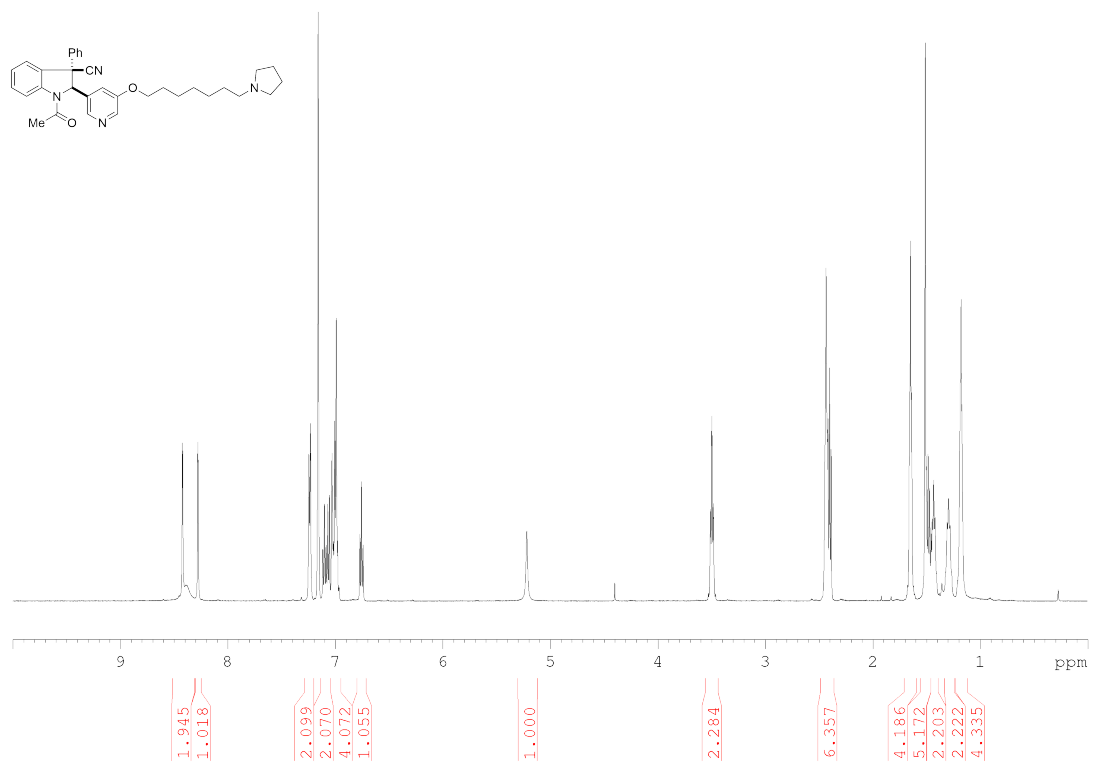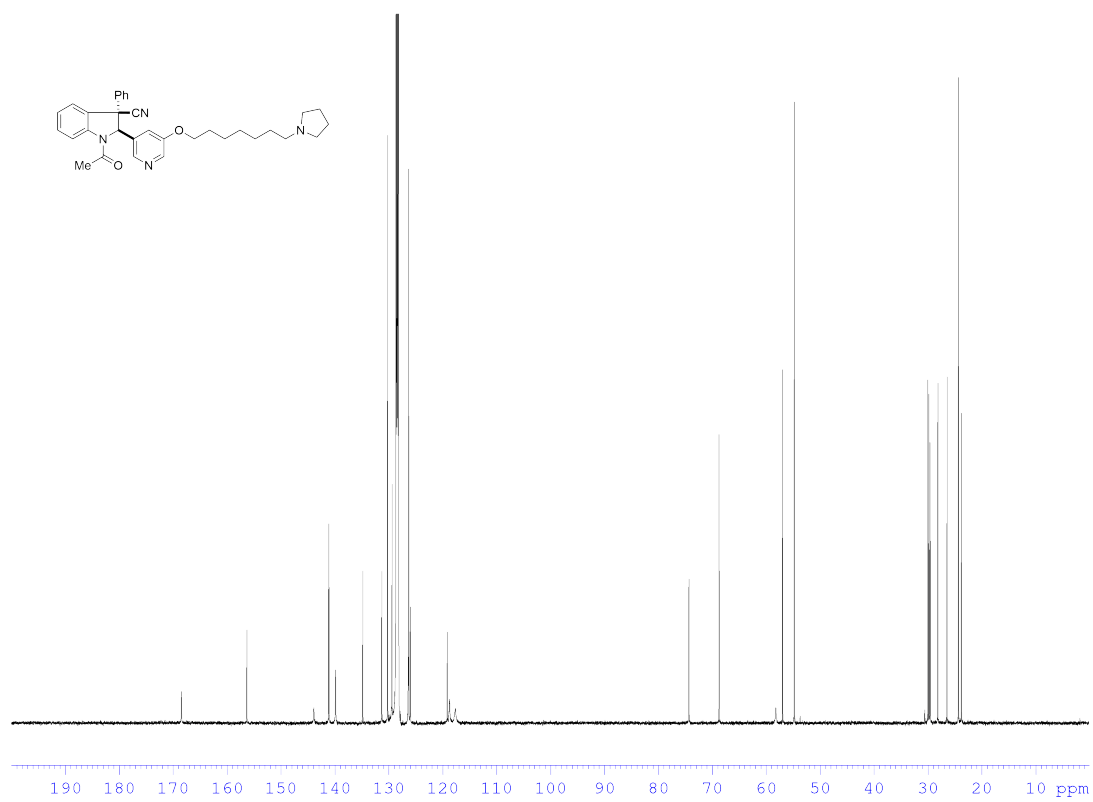

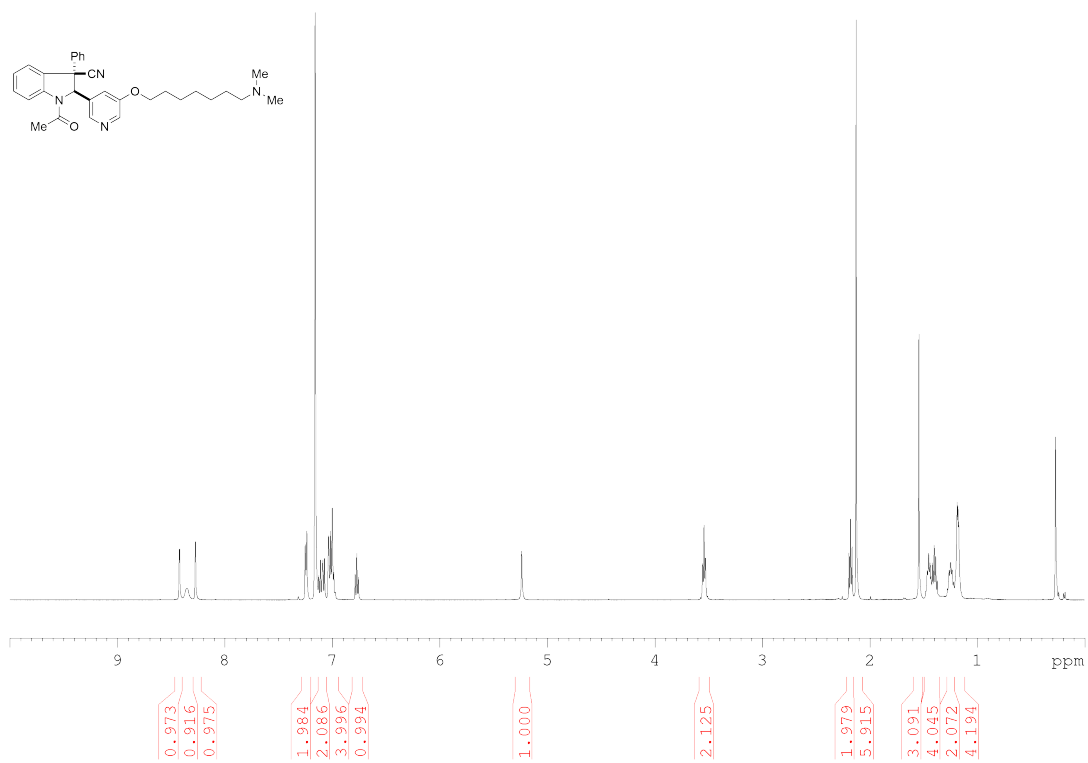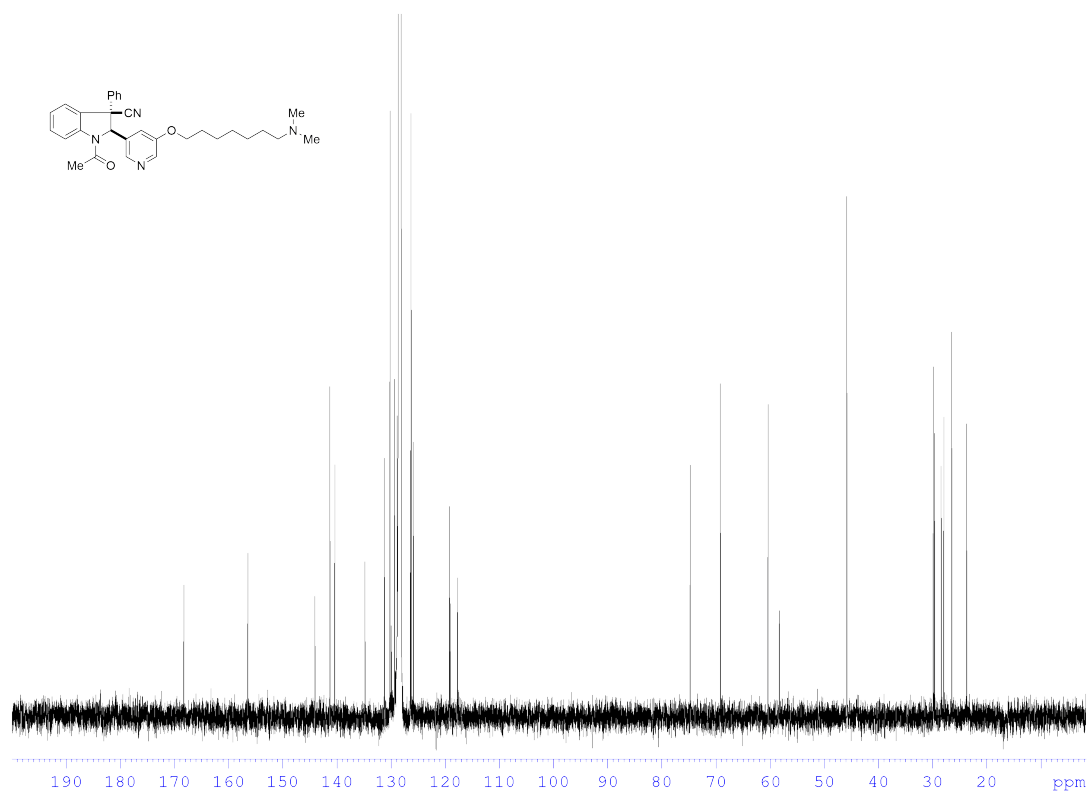

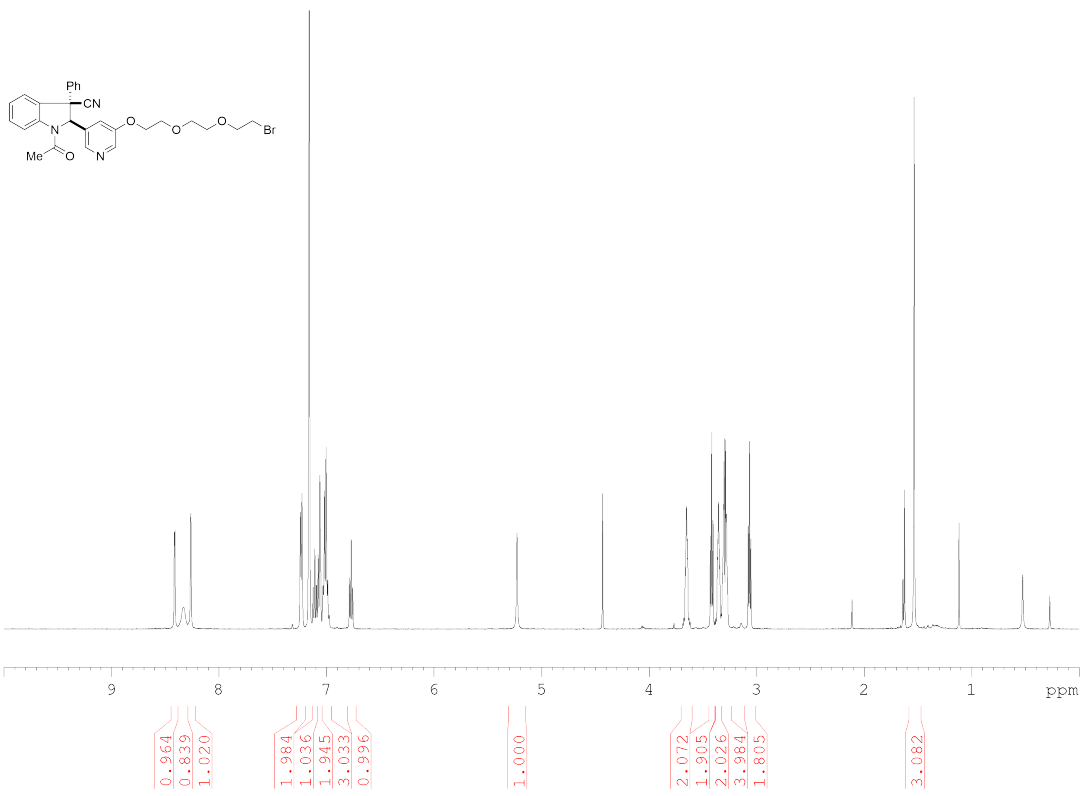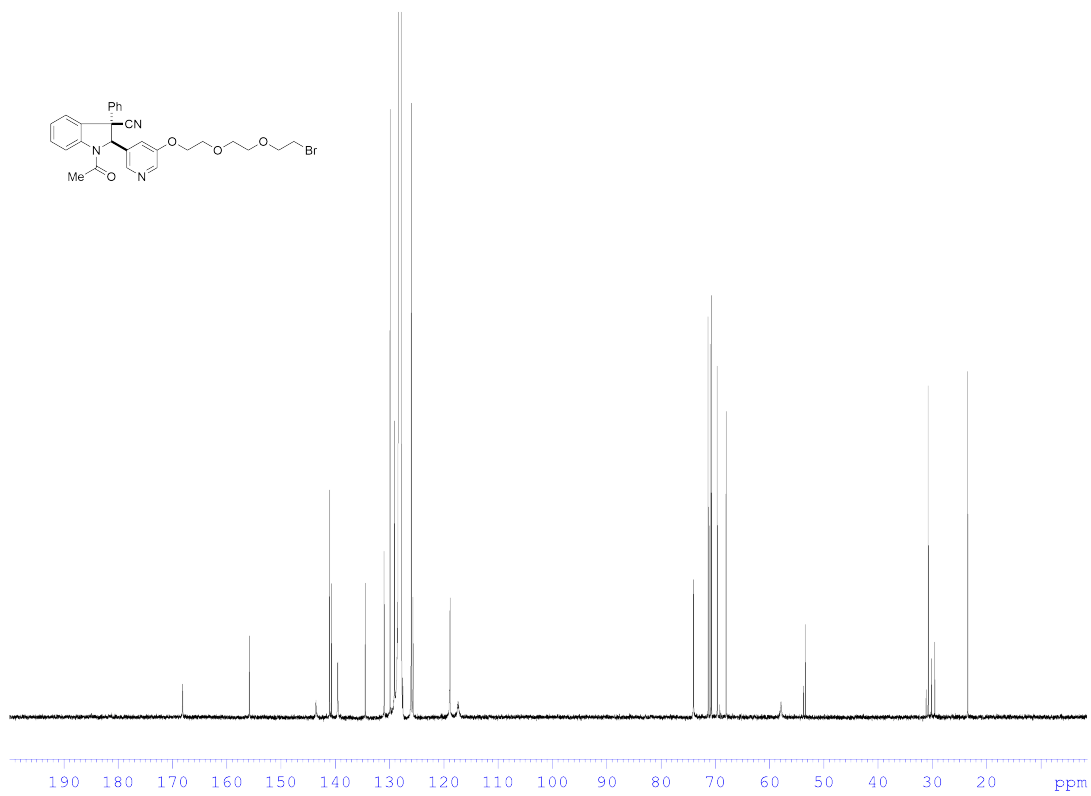

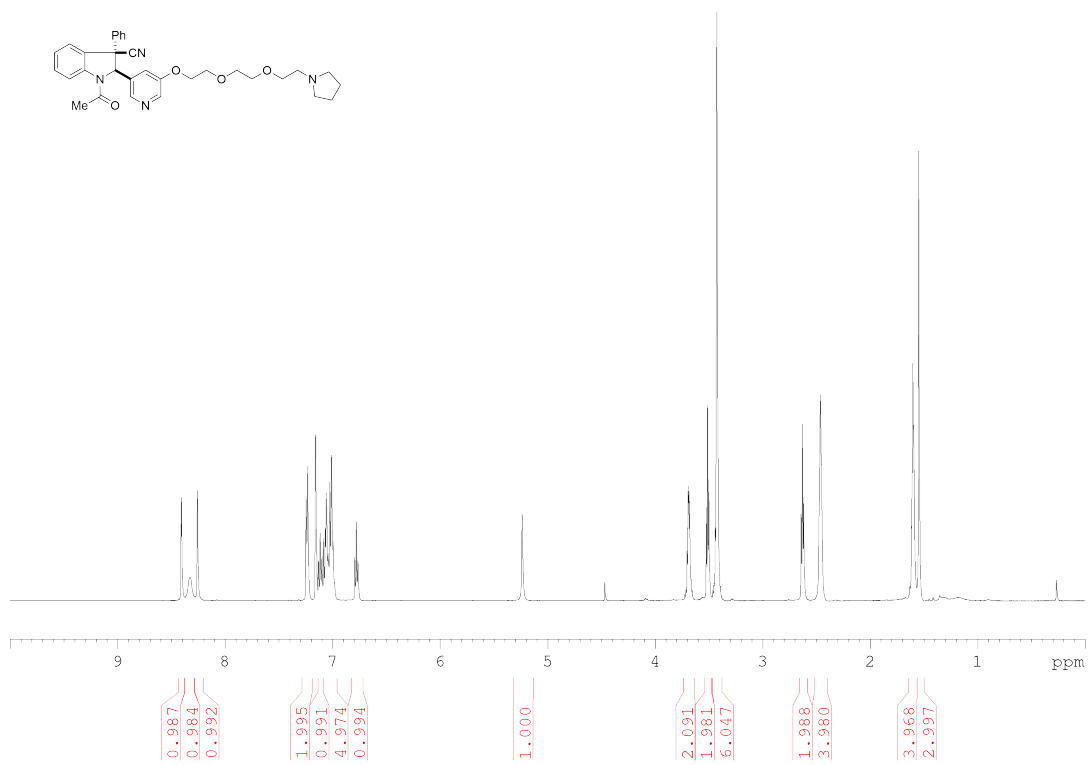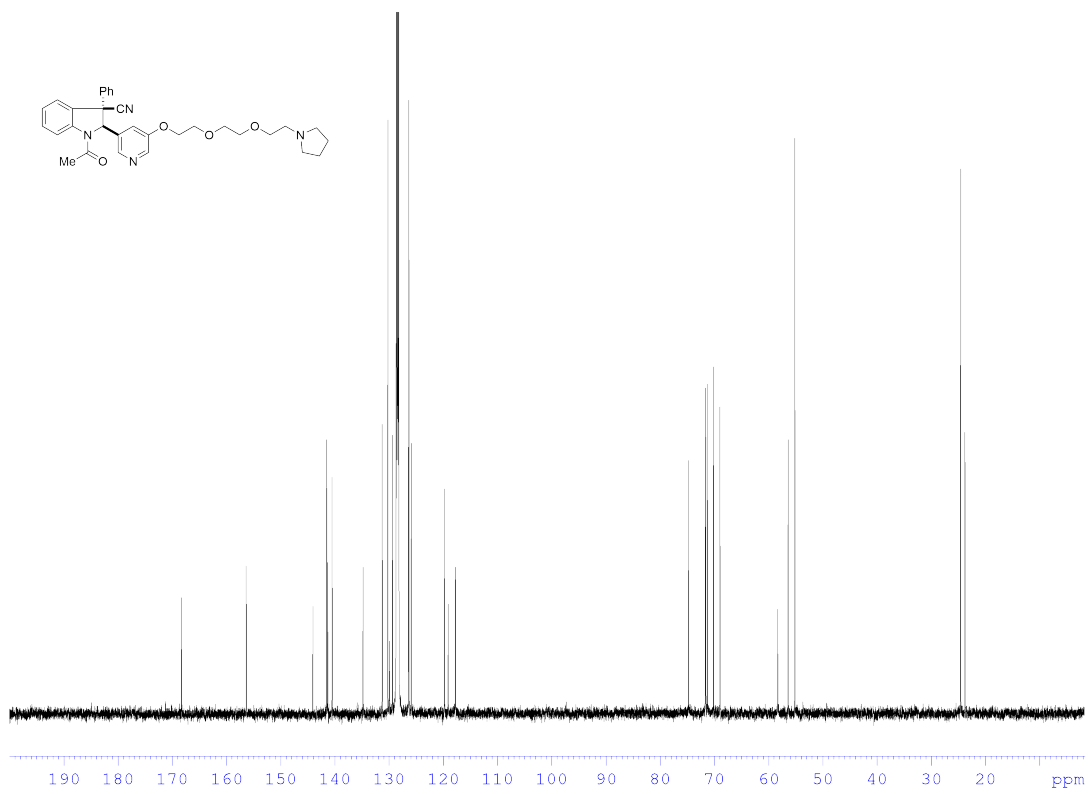

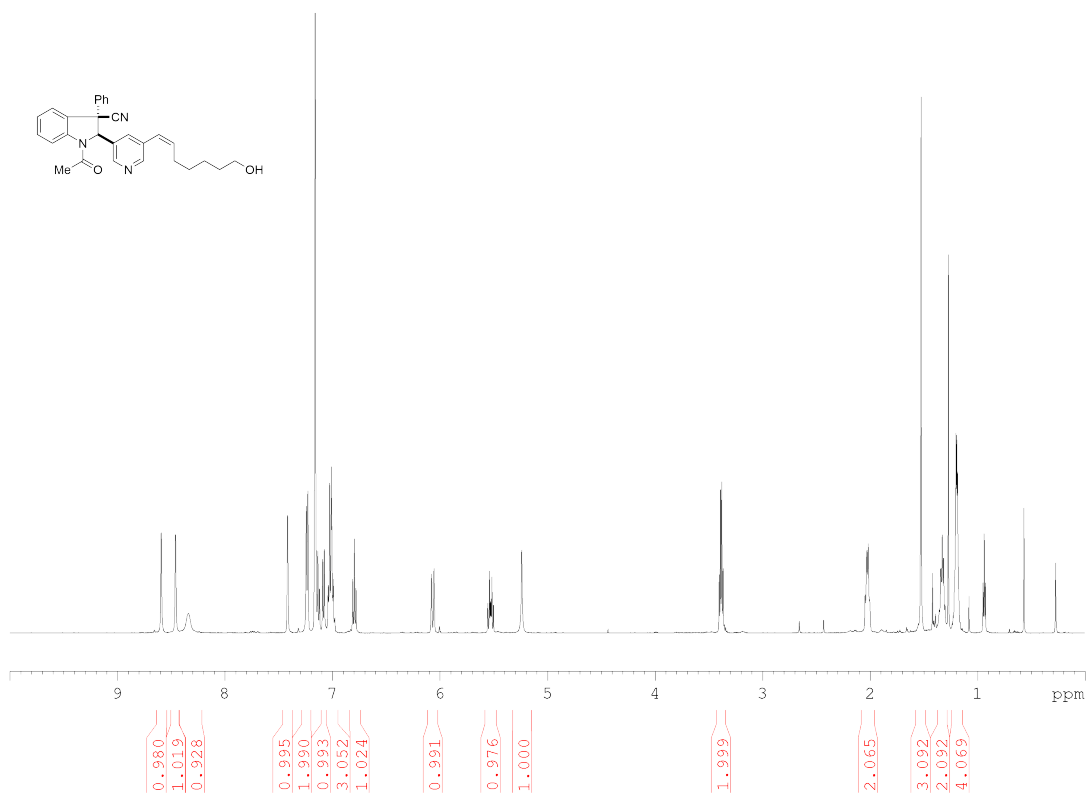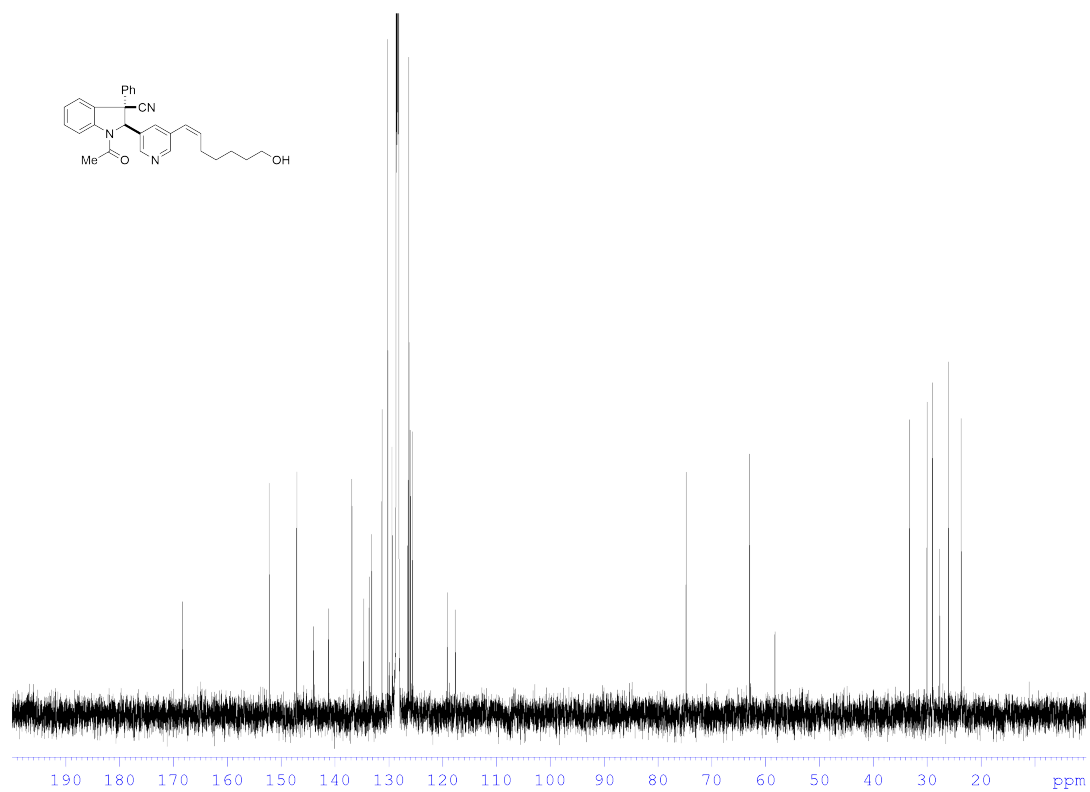



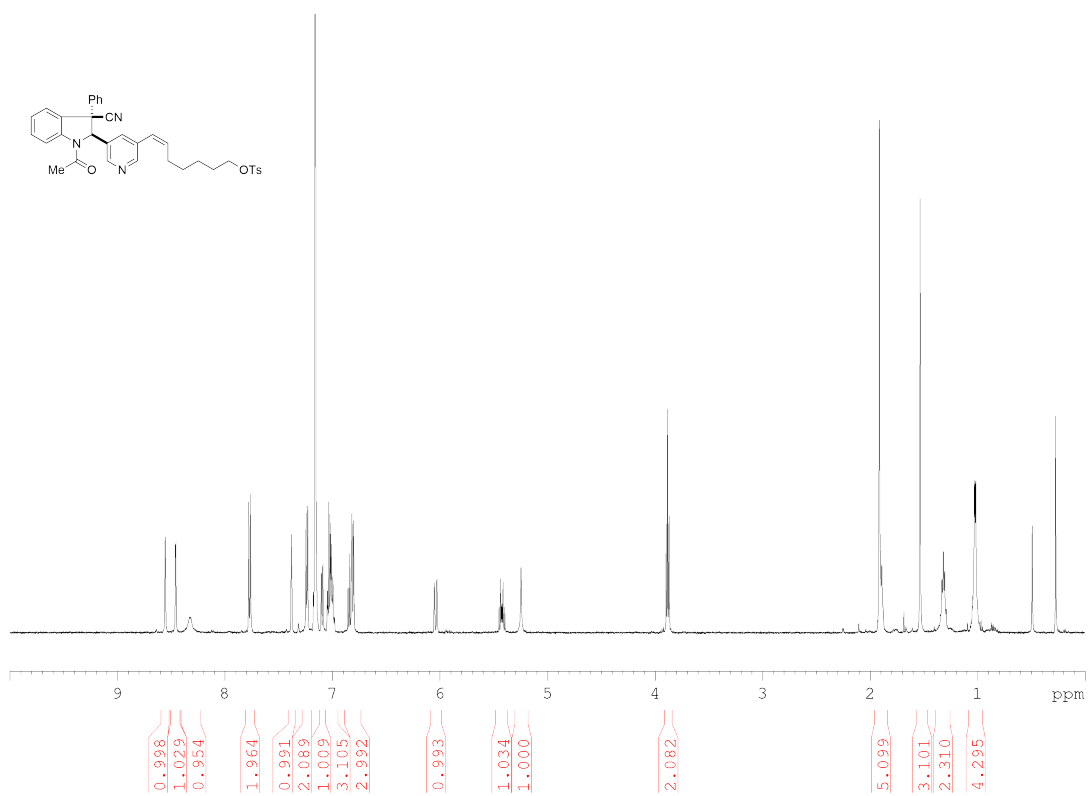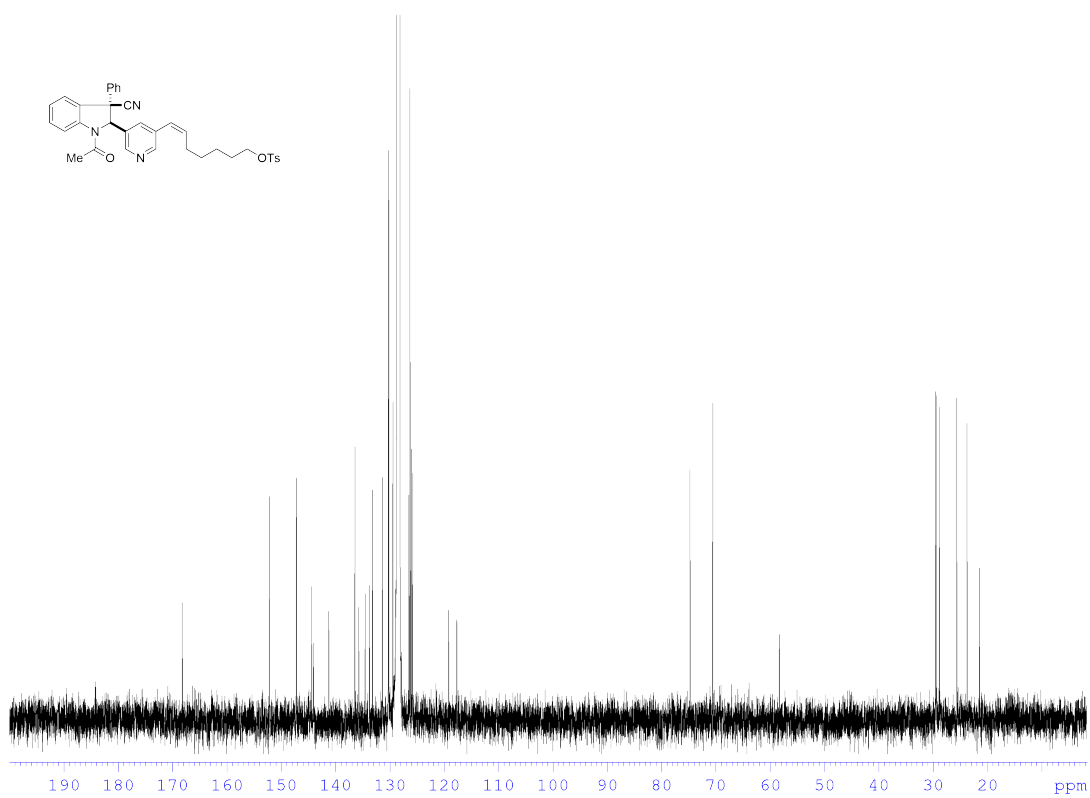

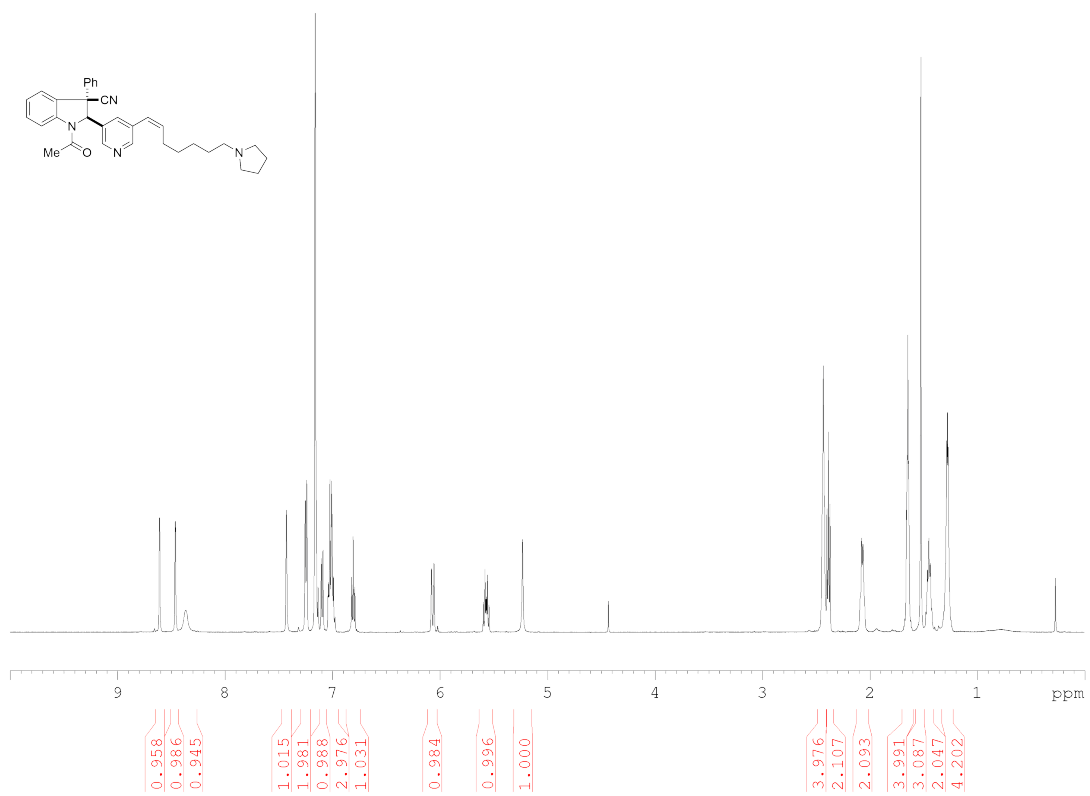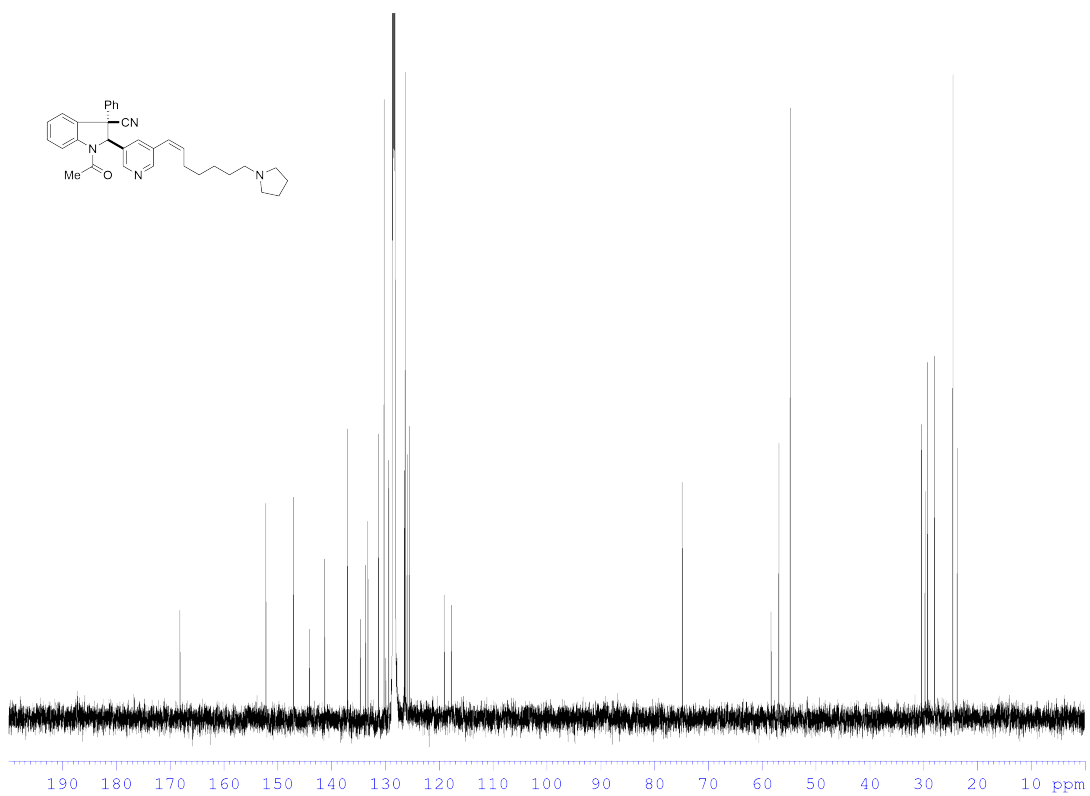

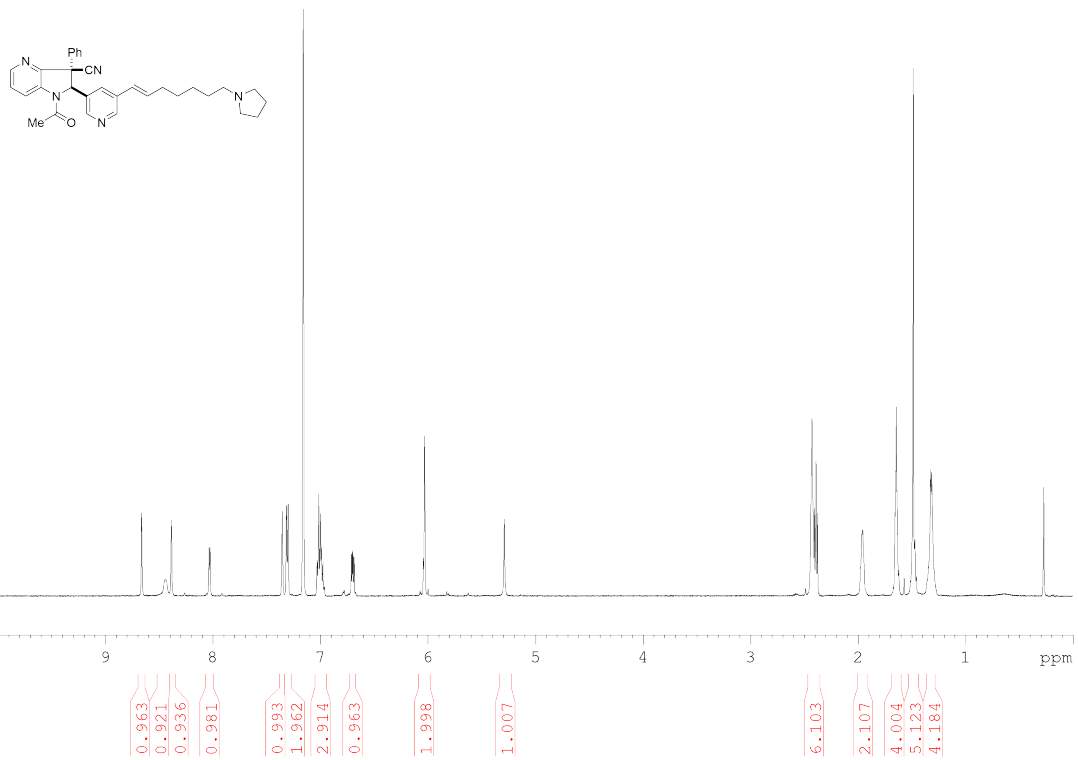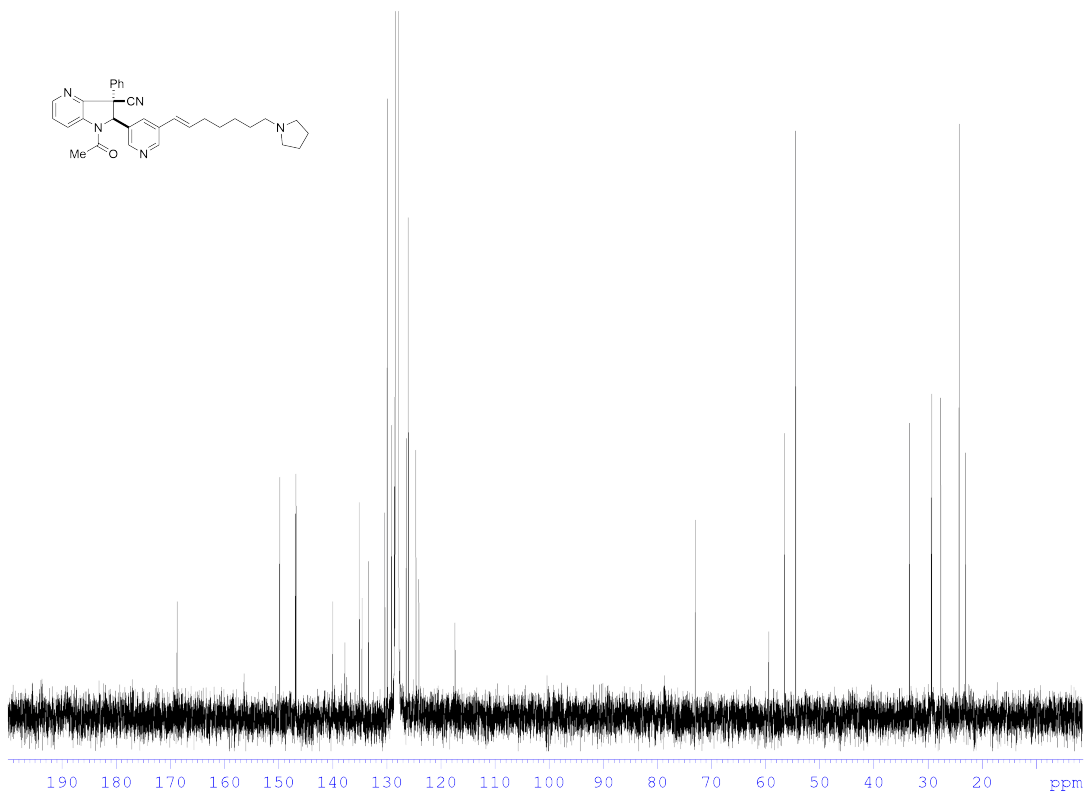

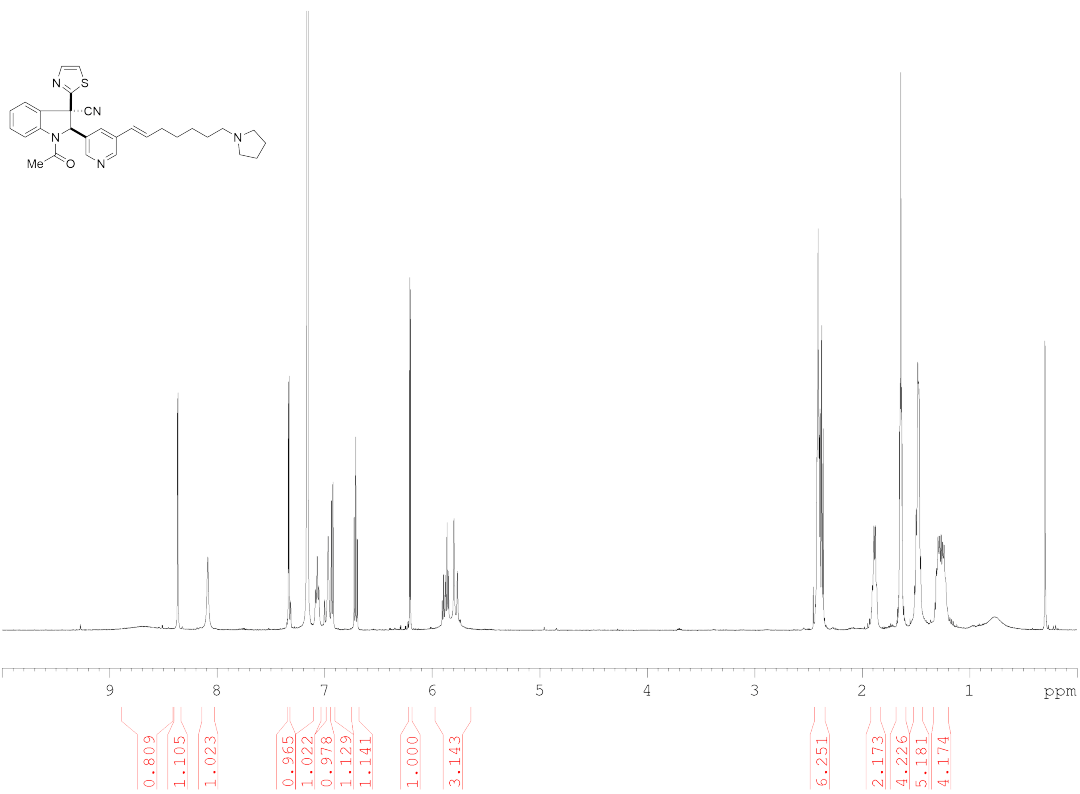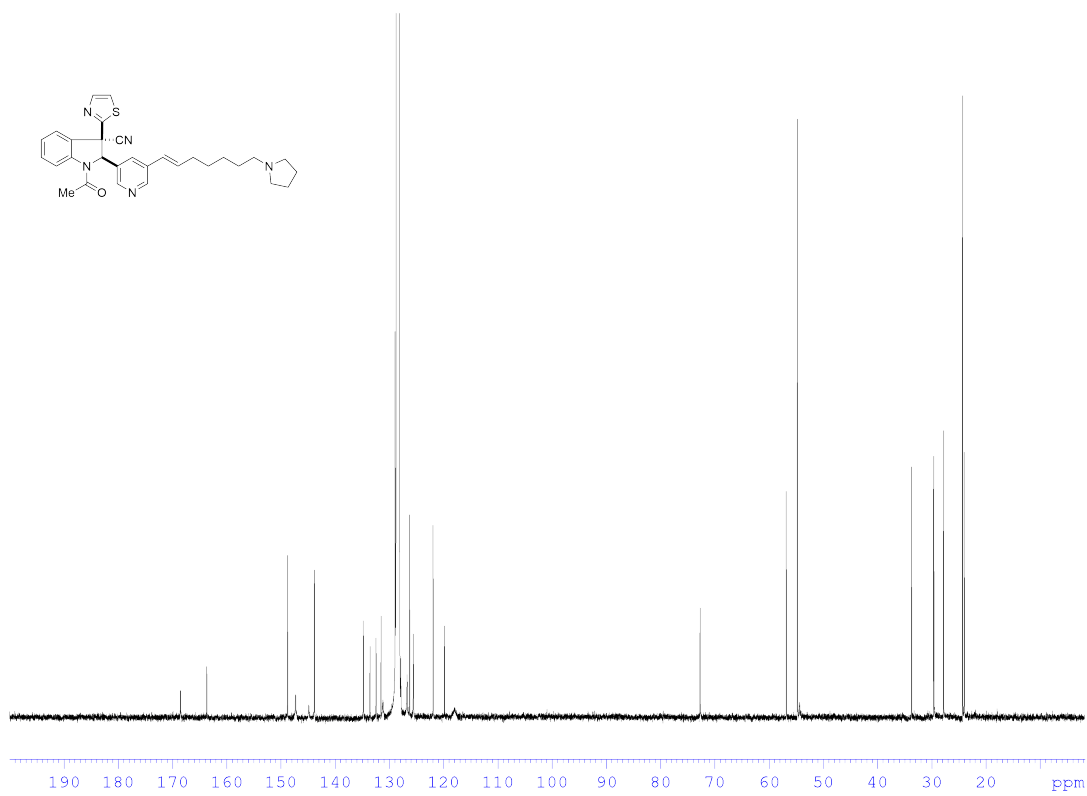

## X) HPLC Traces

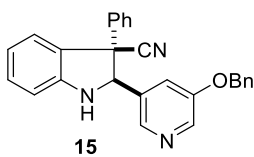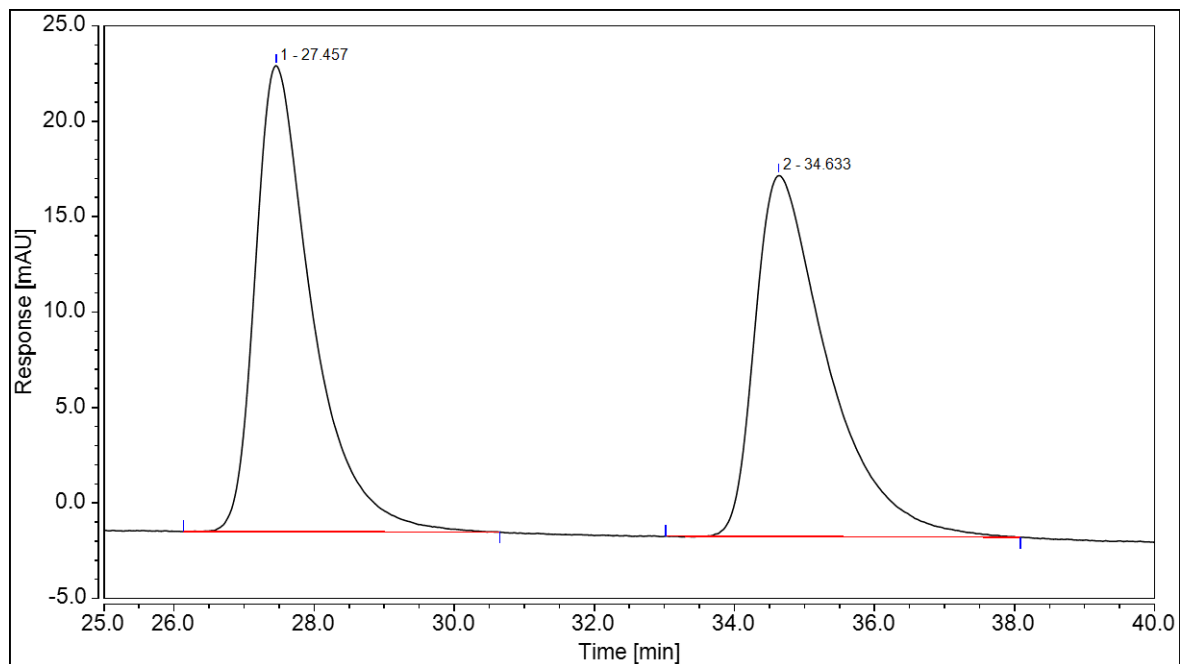

| Integration Results |           |                       |                 |               |                    |                      |        |
|---------------------|-----------|-----------------------|-----------------|---------------|--------------------|----------------------|--------|
| No.                 | Peak Name | Retention Time<br>min | Area<br>mAU*min | Height<br>mAU | Relative Area<br>% | Relative Height<br>% | Amount |
| n.a.                | Peak 1    | n.a.                  | n.a.            | n.a.          | n.a.               | n.a.                 | n.a.   |
| 1                   |           | 27.457                | 23.060          | 24.426        | 50.37              | 56.36                | n.a.   |
| 2                   |           | 34.633                | 22.723          | 18.910        | 49.63              | 43.64                | n.a.   |
| <b>Total:</b>       |           |                       | <b>45.783</b>   | <b>43.336</b> | <b>100.00</b>      | <b>100.00</b>        |        |

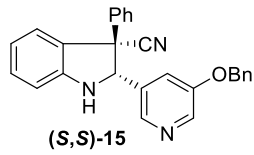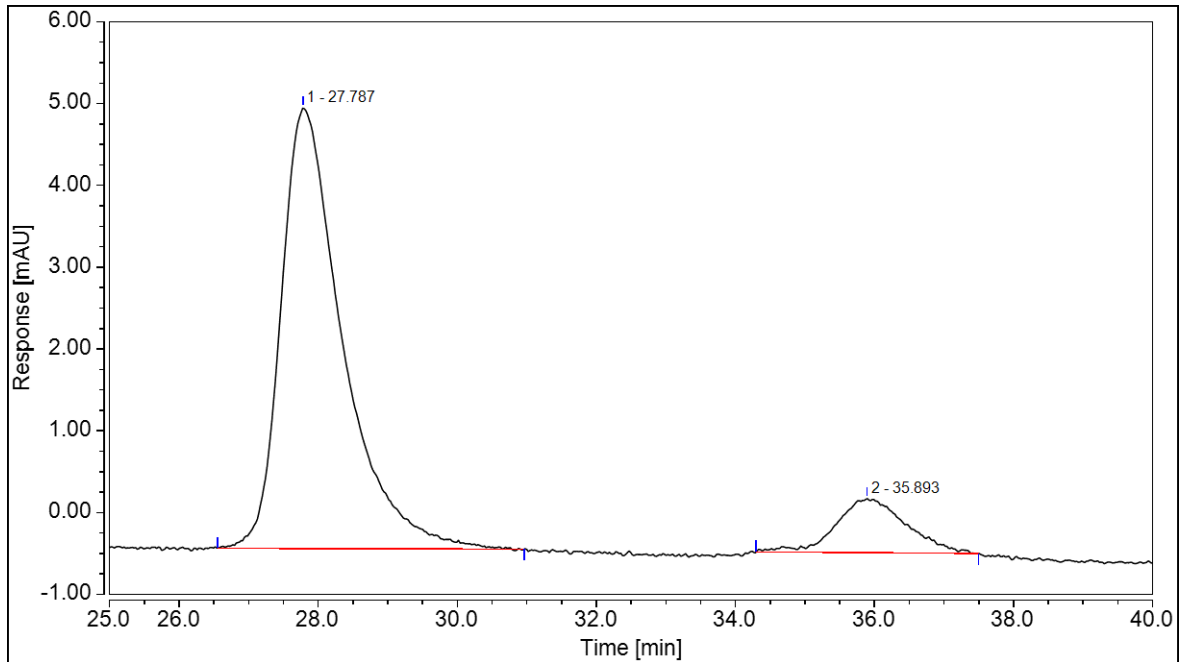

| Integration Results |           |                    |              |              |                 |                   |        |
|---------------------|-----------|--------------------|--------------|--------------|-----------------|-------------------|--------|
| No.                 | Peak Name | Retention Time min | Area mAU*min | Height mAU   | Relative Area % | Relative Height % | Amount |
| n.a.                | Peak 1    | n.a.               | n.a.         | n.a.         | n.a.            | n.a.              | n.a.   |
| 1                   |           | 27.787             | 5.507        | 5.390        | 87.68           | 89.06             | n.a.   |
| 2                   |           | 35.893             | 0.774        | 0.662        | 12.32           | 10.94             | n.a.   |
| <b>Total:</b>       |           |                    | <b>6.281</b> | <b>6.053</b> | <b>100.00</b>   | <b>100.00</b>     |        |

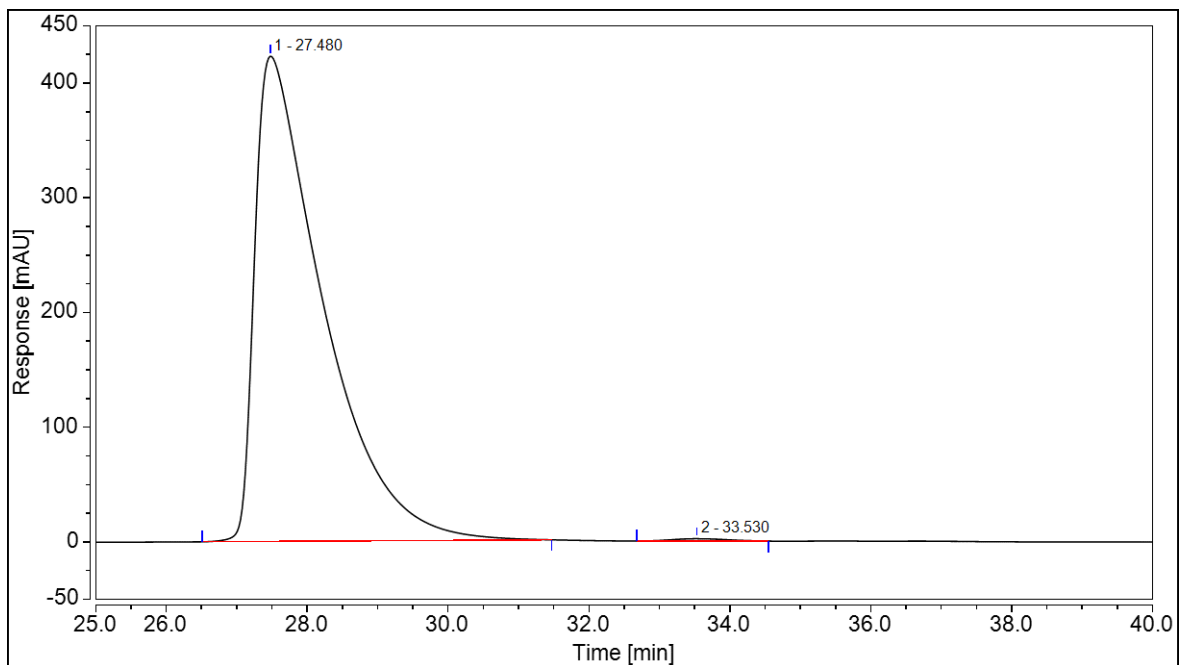

| Integration Results |           |                    |                |                |                 |                   |        |
|---------------------|-----------|--------------------|----------------|----------------|-----------------|-------------------|--------|
| No.                 | Peak Name | Retention Time min | Area mAU*min   | Height mAU     | Relative Area % | Relative Height % | Amount |
| n.a.                | Peak 1    | n.a.               | n.a.           | n.a.           | n.a.            | n.a.              | n.a.   |
| 1                   |           | 27.480             | 474.103        | 423.118        | 99.61           | 99.51             | n.a.   |
| 2                   |           | 33.530             | 1.877          | 2.069          | 0.39            | 0.49              | n.a.   |
| <b>Total:</b>       |           |                    | <b>475.979</b> | <b>425.187</b> | <b>100.00</b>   | <b>100.00</b>     |        |

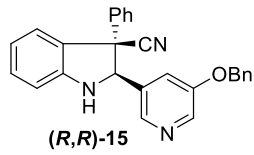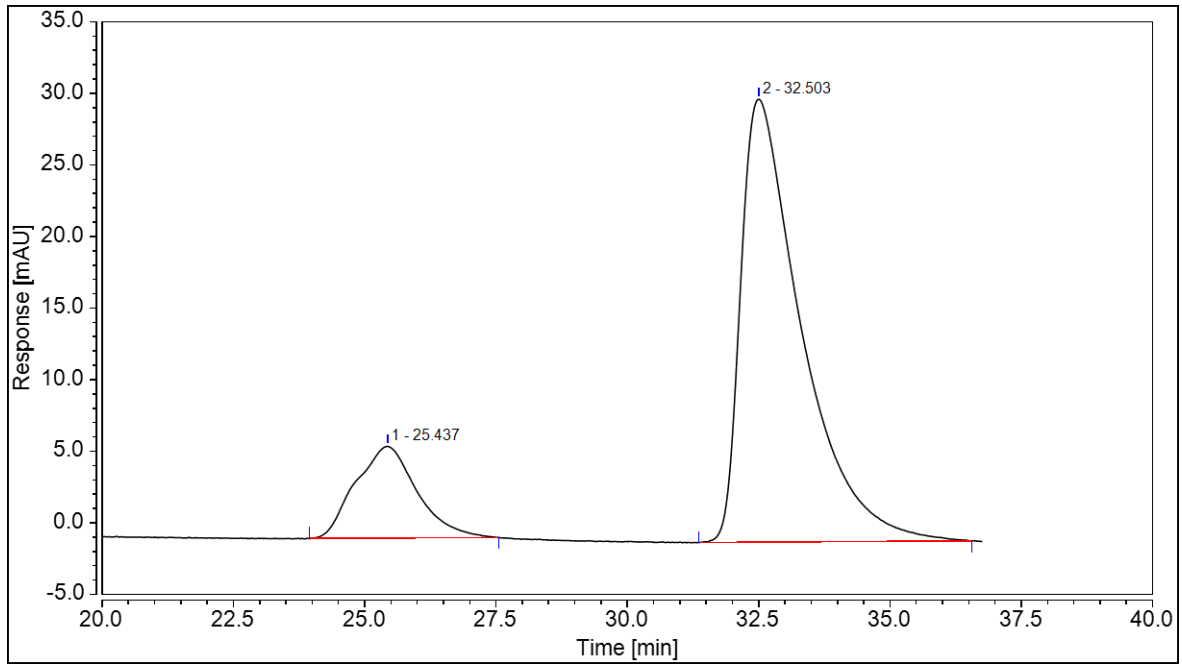

| Integration Results |           |                    |               |               |                 |                   |        |
|---------------------|-----------|--------------------|---------------|---------------|-----------------|-------------------|--------|
| No.                 | Peak Name | Retention Time min | Area mAU*min  | Height mAU    | Relative Area % | Relative Height % | Amount |
| n.a.                | Peak 1    | n.a.               | n.a.          | n.a.          | n.a.            | n.a.              | n.a.   |
| 1                   |           | 25.437             | 8.708         | 6.418         | 17.41           | 17.18             | n.a.   |
| 2                   |           | 32.503             | 41.297        | 30.945        | 82.59           | 82.82             | n.a.   |
| <b>Total:</b>       |           |                    | <b>50.006</b> | <b>37.363</b> | <b>100.00</b>   | <b>100.00</b>     |        |

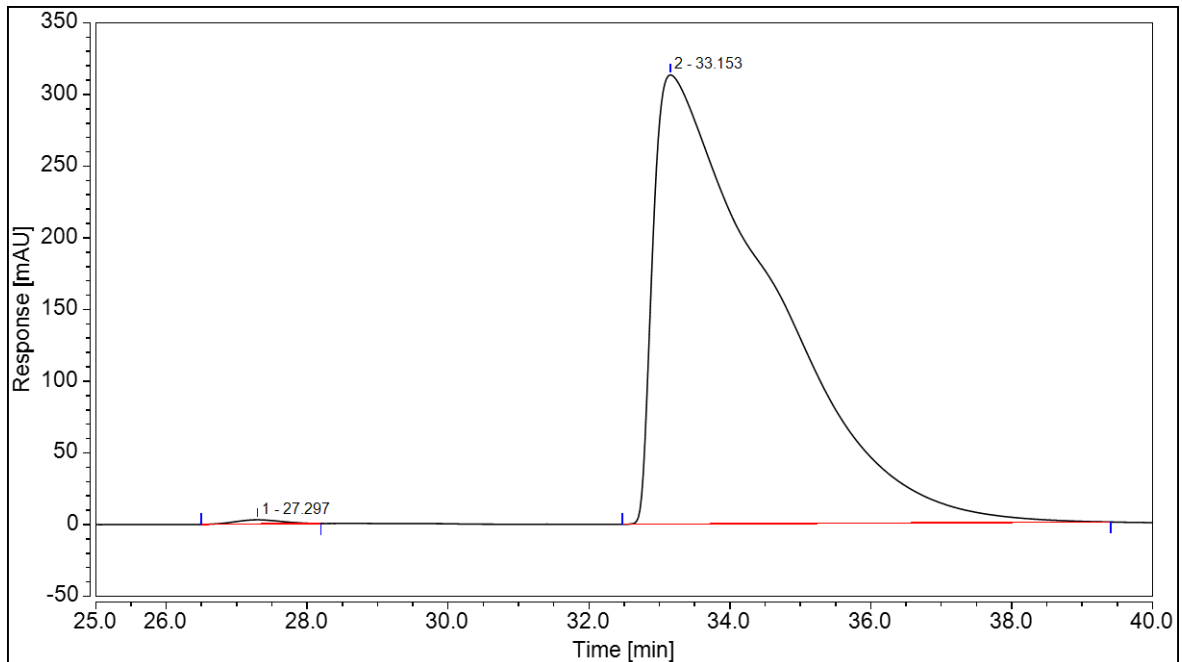

| Integration Results |           |                    |                |                |                 |                   |        |
|---------------------|-----------|--------------------|----------------|----------------|-----------------|-------------------|--------|
| No.                 | Peak Name | Retention Time min | Area mAU*min   | Height mAU     | Relative Area % | Relative Height % | Amount |
| n.a.                | Peak 1    | n.a.               | n.a.           | n.a.           | n.a.            | n.a.              | n.a.   |
| 1                   |           | 27.297             | 2.224          | 2.924          | 0.36            | 0.92              | n.a.   |
| 2                   |           | 33.153             | 608.014        | 313.355        | 99.64           | 99.08             | n.a.   |
| <b>Total:</b>       |           |                    | <b>610.238</b> | <b>316.279</b> | <b>100.00</b>   | <b>100.00</b>     |        |

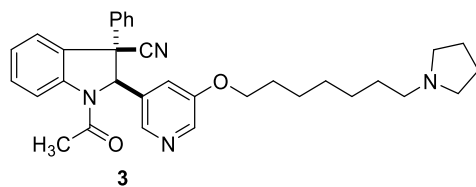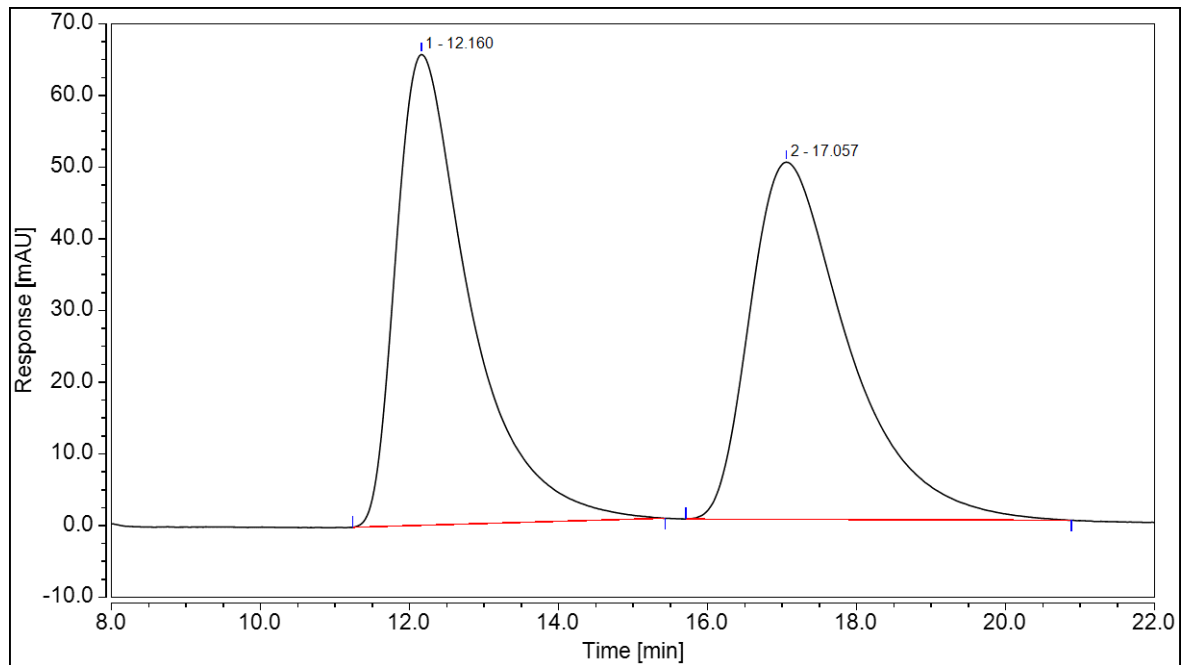

| Integration Results |           |                       |                 |                |                    |                      |        |
|---------------------|-----------|-----------------------|-----------------|----------------|--------------------|----------------------|--------|
| No.                 | Peak Name | Retention Time<br>min | Area<br>mAU*min | Height<br>mAU  | Relative Area<br>% | Relative Height<br>% | Amount |
| n.a.                | Peak 1    | n.a.                  | n.a.            | n.a.           | n.a.               | n.a.                 | n.a.   |
| 1                   |           | 12.160                | 75.775          | 65.695         | 49.85              | 56.86                | n.a.   |
| 2                   |           | 17.057                | 76.239          | 49.842         | 50.15              | 43.14                | n.a.   |
| <b>Total:</b>       |           |                       | <b>152.013</b>  | <b>115.537</b> | <b>100.00</b>      | <b>100.00</b>        |        |



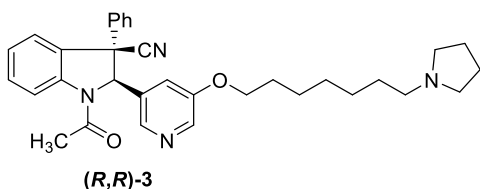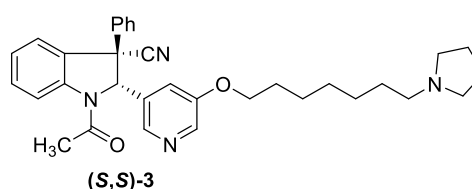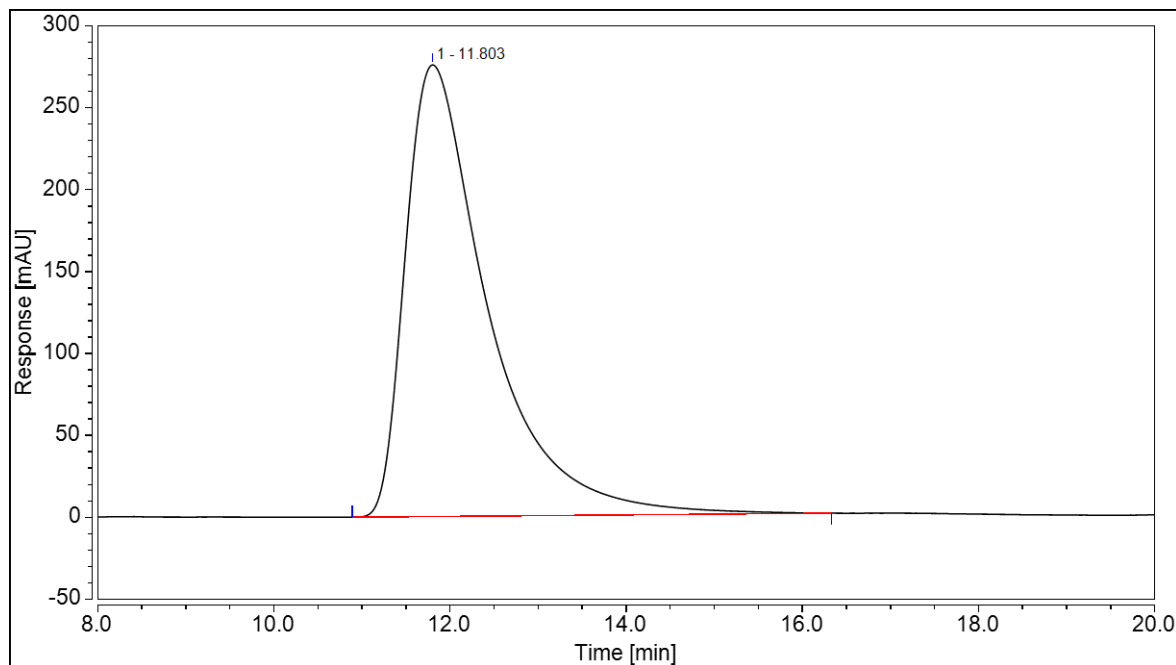

| Integration Results |           |                    |                |                |                 |                   |        |
|---------------------|-----------|--------------------|----------------|----------------|-----------------|-------------------|--------|
| No.                 | Peak Name | Retention Time min | Area mAU*min   | Height mAU     | Relative Area % | Relative Height % | Amount |
| n.a.                | Peak 1    | n.a.               | n.a.           | n.a.           | n.a.            | n.a.              | n.a.   |
| 1                   |           | 11.803             | 299.556        | 275.728        | 100.00          | 100.00            | n.a.   |
| <b>Total:</b>       |           |                    | <b>299.556</b> | <b>275.728</b> | <b>100.00</b>   | <b>100.00</b>     |        |

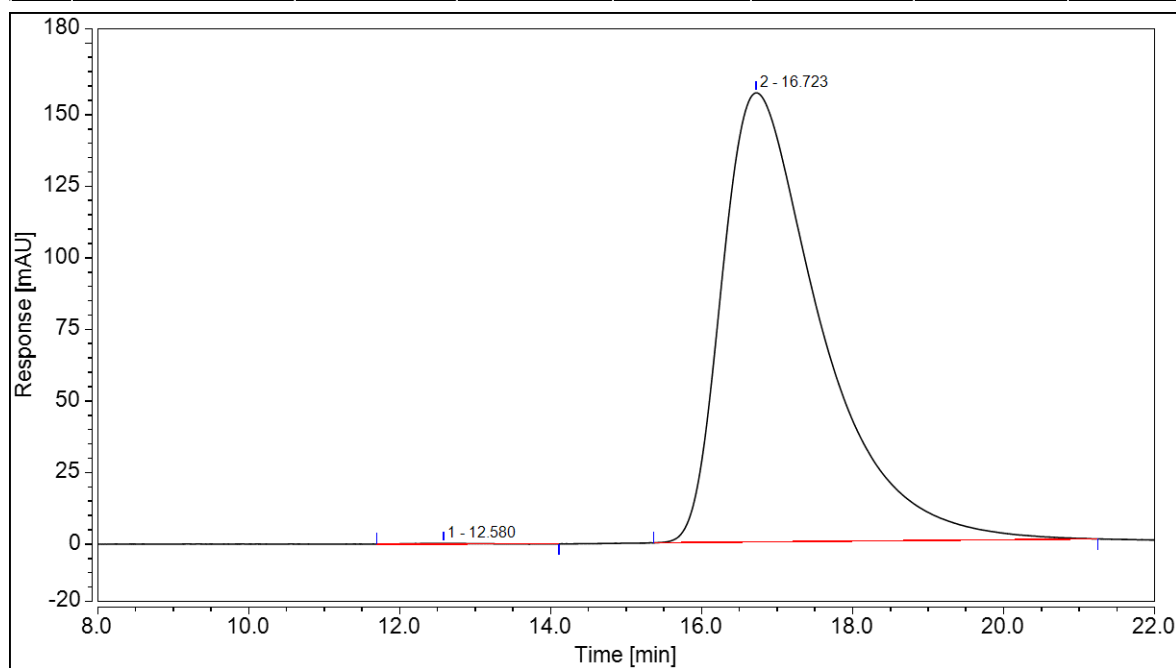

| Integration Results |           |                    |                |                |                 |                   |        |
|---------------------|-----------|--------------------|----------------|----------------|-----------------|-------------------|--------|
| No.                 | Peak Name | Retention Time min | Area mAU*min   | Height mAU     | Relative Area % | Relative Height % | Amount |
| n.a.                | Peak 1    | n.a.               | n.a.           | n.a.           | n.a.            | n.a.              | n.a.   |
| 1                   |           | 12.580             | 0.207          | 0.245          | 0.09            | 0.16              | n.a.   |
| 2                   |           | 16.723             | 237.678        | 156.873        | 99.91           | 99.84             | n.a.   |
| <b>Total:</b>       |           |                    | <b>237.886</b> | <b>157.119</b> | <b>100.00</b>   | <b>100.00</b>     |        |

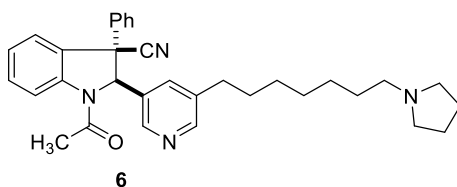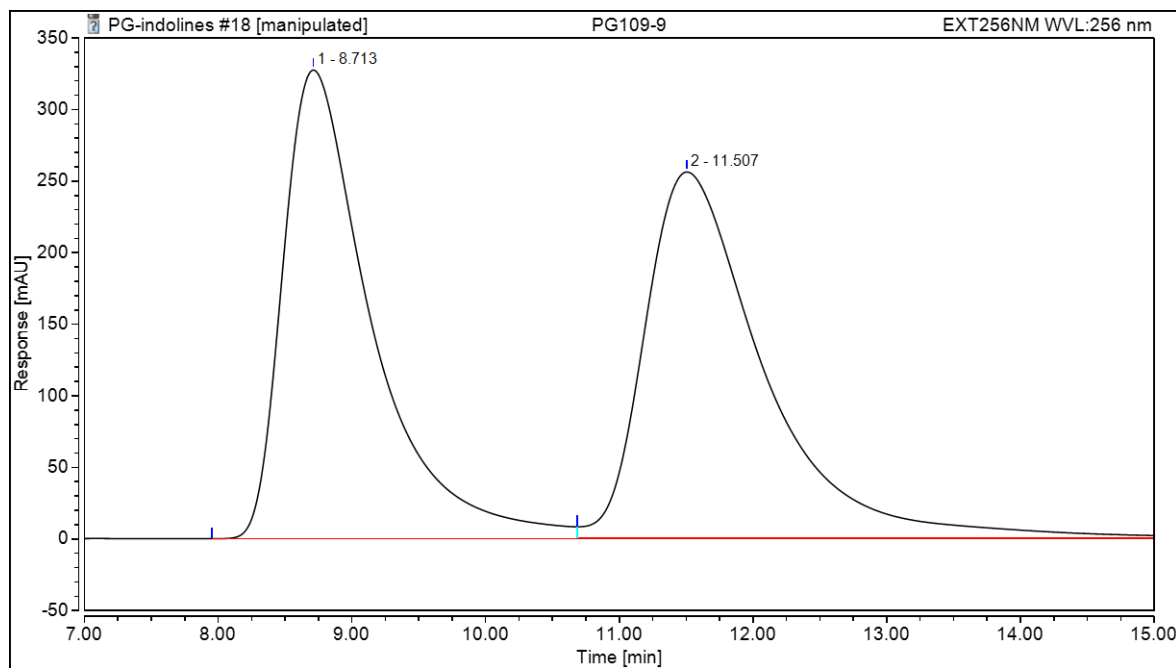

| Integration Results |           |                    |                |                |                 |                   |        |
|---------------------|-----------|--------------------|----------------|----------------|-----------------|-------------------|--------|
| No.                 | Peak Name | Retention Time min | Area mAU*min   | Height mAU     | Relative Area % | Relative Height % | Amount |
| n.a.                | Peak 1    | n.a.               | n.a.           | n.a.           | n.a.            | n.a.              | n.a.   |
| 1                   |           | 8.713              | 252.388        | 327.471        | 48.69           | 56.12             | n.a.   |
| 2                   |           | 11.507             | 266.010        | 256.089        | 51.31           | 43.88             | n.a.   |
| <b>Total:</b>       |           |                    | <b>518.397</b> | <b>583.560</b> | <b>100.00</b>   | <b>100.00</b>     |        |

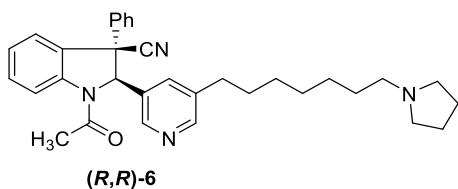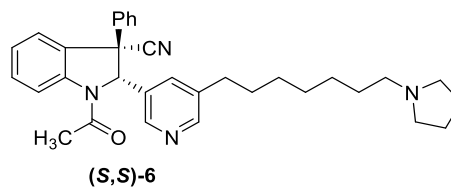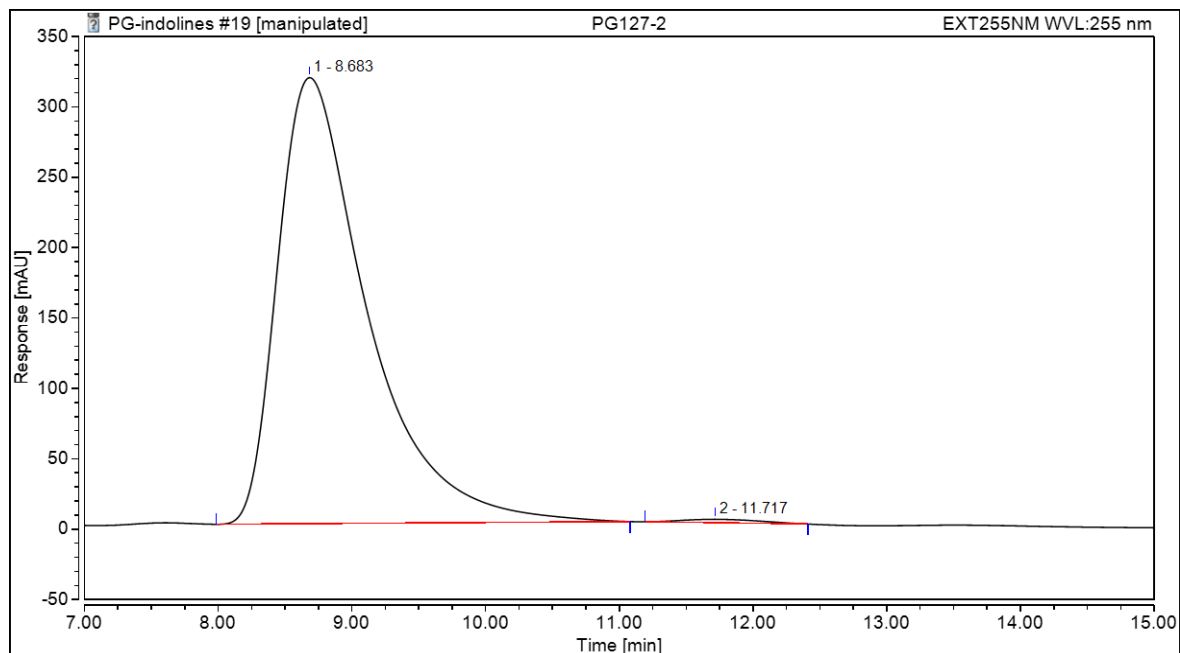

| Integration Results |           |                       |                 |                |                    |                      |        |
|---------------------|-----------|-----------------------|-----------------|----------------|--------------------|----------------------|--------|
| No.                 | Peak Name | Retention Time<br>min | Area<br>mAU*min | Height<br>mAU  | Relative Area<br>% | Relative Height<br>% | Amount |
| n.a.                | Peak 1    | n.a.                  | n.a.            | n.a.           | n.a.               | n.a.                 | n.a.   |
| 1                   |           | 8.683                 | 246.252         | 316.982        | 99.33              | 99.24                | n.a.   |
| 2                   |           | 11.717                | 1.659           | 2.436          | 0.67               | 0.76                 | n.a.   |
| <b>Total:</b>       |           |                       | <b>247.911</b>  | <b>319.418</b> | <b>100.00</b>      | <b>100.00</b>        |        |

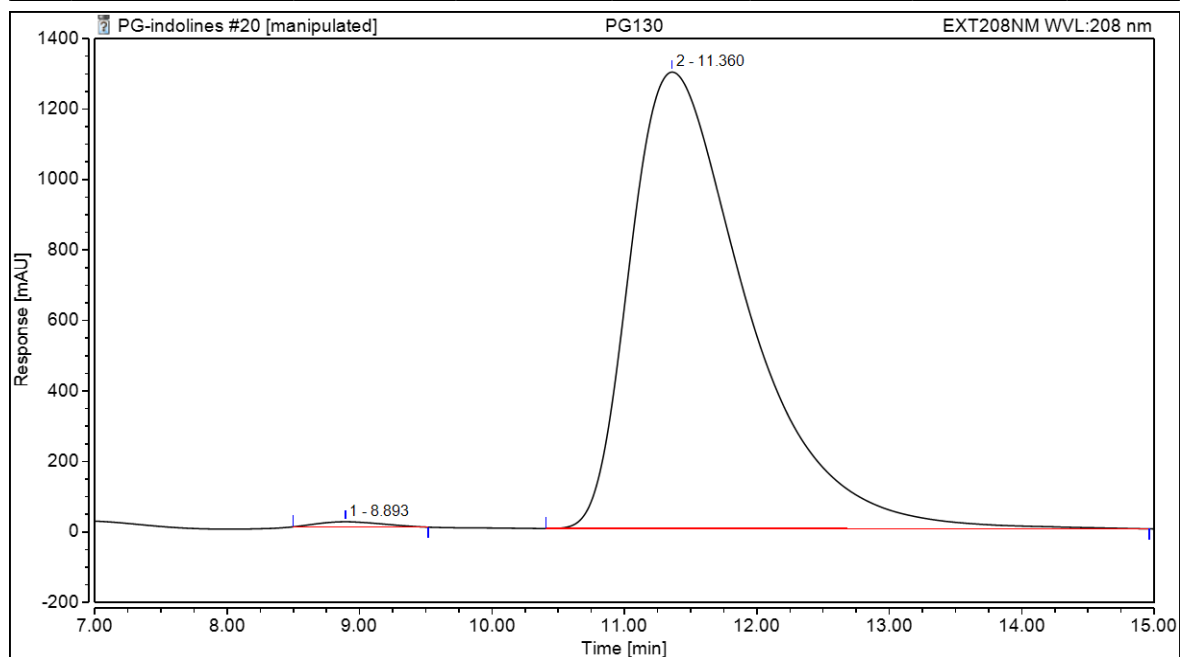

| Integration Results |           |                       |                 |                 |                    |                      |        |
|---------------------|-----------|-----------------------|-----------------|-----------------|--------------------|----------------------|--------|
| No.                 | Peak Name | Retention Time<br>min | Area<br>mAU*min | Height<br>mAU   | Relative Area<br>% | Relative Height<br>% | Amount |
| n.a.                | Peak 1    | n.a.                  | n.a.            | n.a.            | n.a.               | n.a.                 | n.a.   |
| 1                   |           | 8.893                 | 8.271           | 14.658          | 0.62               | 1.12                 | n.a.   |
| 2                   |           | 11.360                | 1328.356        | 1295.627        | 99.38              | 98.88                | n.a.   |
| <b>Total:</b>       |           |                       | <b>1336.627</b> | <b>1310.284</b> | <b>100.00</b>      | <b>100.00</b>        |        |

## XI) X-ray Crystallography Data

### X-ray Crystallographic Data and Structure Refinement for 77, 007JDJ14

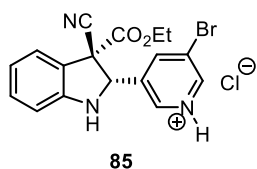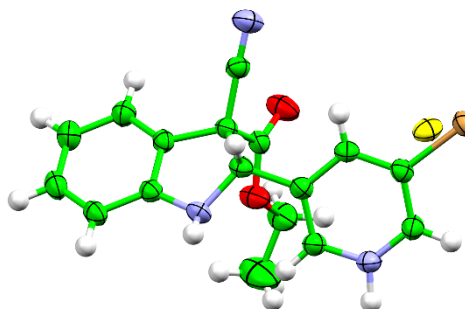

|                                              |                                                                   |               |
|----------------------------------------------|-------------------------------------------------------------------|---------------|
| Identification code                          | 007JDJ14                                                          |               |
| Empirical formula                            | C <sub>17</sub> H <sub>15</sub> BrClN <sub>3</sub> O <sub>2</sub> |               |
| Formula weight                               | 408.68                                                            |               |
| Temperature                                  | 150 K                                                             |               |
| Wavelength                                   | 0.71073 Å                                                         |               |
| Crystal system                               | Triclinic                                                         |               |
| Space group                                  | C 2/c                                                             |               |
| Unit cell dimensions                         | a = 41.1184 Å                                                     | α = 90°       |
|                                              | b = 8.77720 Å                                                     | β = 113.8427° |
|                                              | c = 22.7766 Å                                                     | γ = 90°       |
| Volume                                       | 7518.66 Å <sup>3</sup>                                            |               |
| Z,Z'                                         | Z: 16 Z': 0                                                       |               |
| Density (calculated)                         | 1.44 Mg m <sup>-3</sup>                                           |               |
| Absorption coefficient                       | 2.342 mm <sup>-1</sup>                                            |               |
| F(000)                                       | 3296.0                                                            |               |
| Crystal size                                 | 0.04 x 0.18 x 0.40 mm <sup>3</sup>                                |               |
| Theta range for data collection              | 5.122° to 27.496°                                                 |               |
| Reflections collected                        | 15307                                                             |               |
| Independent reflections                      | 8581                                                              |               |
| Absorption correction                        | Multi-scan                                                        |               |
| Refinement method                            | Full-matrix least squares on F <sup>2</sup>                       |               |
| Goodness-of-fit on F <sup>2</sup>            | 0.974                                                             |               |
| Final R indices [ <i>I</i> > 2σ( <i>I</i> )] | R <sup>1</sup> = 0.0656, wR <sup>2</sup> = 0.1703                 |               |
| R indices (all data)                         | R <sup>1</sup> = 0.0888, wR <sup>2</sup> = 0.1852                 |               |

X-ray Crystallographic Data and Structure  
for 100, 030JDJ15

Refinement

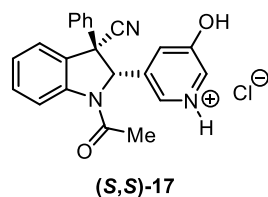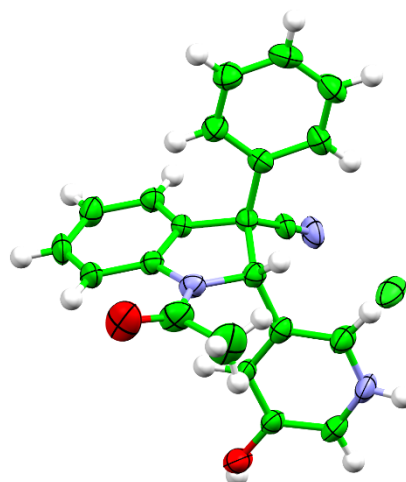

|                                 |                                                                                                           |
|---------------------------------|-----------------------------------------------------------------------------------------------------------|
| Identification code             | 030JDJ15                                                                                                  |
| Empirical formula               | C <sub>23</sub> H <sub>21</sub> ClN <sub>3</sub> O <sub>2.5</sub>                                         |
| Formula weight                  | 414.89                                                                                                    |
| Temperature                     | 150 K                                                                                                     |
| Wavelength                      | 1.54180 Å                                                                                                 |
| Crystal system                  | Triclinic                                                                                                 |
| Space group                     | P 1                                                                                                       |
| Unit cell dimensions            | a = 8.6005 Å      α =<br>b = 8.7390 Å      β =<br>c = 15.6102 Å     γ =<br>103.198°<br>92.916°<br>98.395° |
| Volume                          | 1125.70 Å <sup>3</sup>                                                                                    |
| Z,Z'                            | Z: 2 Z': 0                                                                                                |
| Density (calculated)            | 1.22 Mg m <sup>-3</sup>                                                                                   |
| Absorption coefficient          | 1.706 mm <sup>-1</sup>                                                                                    |
| F(000)                          | 434.0                                                                                                     |
| Crystal size                    | 0.01 x 0.03 x 0.20 mm <sup>3</sup>                                                                        |
| Theta range for data collection | 5.218° to 75.980°                                                                                         |
| Reflections collected           | 22875                                                                                                     |
| Independent reflections         | 8722                                                                                                      |
| Absorption correction           | Multi-scan                                                                                                |
| Refinement                      | Full-matrix least squares                                                                                 |

|                      |                                                   |
|----------------------|---------------------------------------------------|
| method               | on F <sup>2</sup>                                 |
| Goodness-of-fit      | 0.996                                             |
| on F <sup>2</sup>    |                                                   |
| Final R indices      | R <sup>1</sup> = 0.0753, wR <sup>2</sup> =        |
| [I>2σ(I)]            | 0.2132                                            |
| R indices (all data) | R <sup>1</sup> = 0.0800, wR <sup>2</sup> = 0.2208 |

## XII) References

- Pangborn, A. B.; Giardello, M. A.; Grubbs, R. H.; Rosen, R. K.; Timmers, F. J., Safe and Convenient Procedure for Solvent Purification. *Organometallics* **1996**, *15* (5), 1518-1520.
- Armarego, W. L. F.; Perrin, D. D., *Purification of Laboratory Chemicals*. 4 ed.; Butterworth Heinemann: Oxford, 1996.
- Makosza, M.; Tomashewskij, A. A., Does Nitroarylation of Phenylacetonitrile Proceed as a Phase-Transfer Catalyzed Process? *J. Org. Chem.* **1995**, *60* (17), 5425-9.
- MacMillan, K. S.; Nguyen, T.; Nguyen, T.; Hwang, I.; Boger, D. L., Total synthesis and evaluation of iso-duocarmycin SA and iso-yatakemycin. *J Am Chem Soc* **2009**, *131* (3), 1187-94.
- Yamazaki, Y.; Toma, T.; Nishikawa, M.; Ozawa, H.; Okuda, A.; Araki, T.; Abe, K.; Oda, S. Preparation of azole compounds as PPAR $\alpha$  agonists. WO2005023777A1, 2005.
- Sharma, K.; Wolstenhulme, J. R.; Painter, P. P.; Yeo, D.; Grande-Carmona, F.; Johnston, C. P.; Tantillo, D. J.; Smith, M. D., Cation-Controlled Enantioselective and Diastereoselective Synthesis of Indolines: An Autoinductive Phase-Transfer Initiated 5-endo-trig Process. *J. Am. Chem. Soc.* **2015**, *137* (41), 13414-13424.
- Choi, S. E.; Pflum, M. K. H., The structural requirements of histone deacetylase inhibitors: Suberoylanilide hydroxamic acid analogs modified at the C6 position. *Bioorganic & Medicinal Chemistry Letters* **2012**, *22* (23), 7084-7086.
- Rosillo, M.; Arnáiz, E.; Abdi, D.; Blanco-Urgoiti, J.; Domínguez, G.; Pérez-Castells, J., Combination of RCM and the Pauson-Khand Reaction: One-Step Synthesis of Tricyclic Structures. *European Journal of Organic Chemistry* **2008**, *2008* (23), 3917-3927.
- Mallia, C. J.; Englert, L.; Walter, G. C.; Baxendale, I. R., Thiazole formation through a modified Gewald reaction. *Beilstein J. Org. Chem.* **2015**, *11*, 875-883.
- Morales, S.; Guijarro, F. G.; Garcia Ruano, J. L.; Cid, M. B., A General Aminocatalytic Method for the Synthesis of Aldimines. *J. Am. Chem. Soc.* **2014**, *136* (3), 1082-1089.
- Jackson, R. F. W.; Wishart, N.; Wood, A.; James, K.; Wythes, M. J., Preparation of enantiomerically pure protected 4-oxo  $\alpha$ -amino acids and 3-aryl  $\alpha$ -amino acids from serine. *J. Org. Chem.* **1992**, *57* (12), 3397-404.
- Ahad, A. M.; Jensen, S. M.; Jewett, J. C., A Traceless Staudinger Reagent To Deliver Diazirines. *Org. Lett.* **2013**, *15* (19), 5060-5063.
- Caldarelli, S. A.; El Fangour, S.; Wein, S.; Tran van Ba, C.; Perigaud, C.; Pellet, A.; Vial, H. J.; Peyrottes, S., New Bis-thiazolium Analogues as Potential Antimalarial Agents: Design, Synthesis, and Biological Evaluation. *J. Med. Chem.* **2013**, *56* (2), 496-509.

14. Wei, Z.-L.; Petukhov, P. A.; Bizik, F.; Teixeira, J. C.; Mercola, M.; Volpe, E. A.; Glazer, R. I.; Willson, T. M.; Kozikowski, A. P., Isoxazolyl-serine-based agonists of peroxisome proliferator-activated receptor: design, synthesis, and effects on cardiomyocyte differentiation. *J. Am. Chem. Soc.* **2004**, *126* (51), 16714-16715.
15. Altendorfer, M.; Raja, A.; Sasse, F.; Irschik, H.; Menche, D., Modular synthesis of polyene side chain analogues of the potent macrolide antibiotic etnangien by a flexible coupling strategy based on hetero-bis-metallated alkenes. *Org. Biomol. Chem.* **2013**, *11* (13), 2116-2139.
16. Coombs, J. R.; Zhang, L.; Morken, J. P., Enantiomerically Enriched Tris(boronates): Readily Accessible Conjunctive Reagents for Asymmetric Synthesis. *J. Am. Chem. Soc.* **2014**, *136* (46), 16140-16143.
17. Takami, K.; Yorimitsu, H.; Oshima, K., Trans-Hydrometalation of Alkynes by a Combination of InCl<sub>3</sub> and DIBAL-H: One-Pot Access to Functionalized (Z)-Alkenes. *Org. Lett.* **2002**, *4* (17), 2993-2995.
18. Kondrat, F.D., Struwe, W.B., & Benesch, J.L.P., Native mass spectrometry: towards high-throughput structural proteomics, *Methods Mol. Biol.* (2014), 1261:349-71.
19. Lamb, A. D., Asymmetric synthesis of heterocycles via cation-directed cyclizations and rearrangements. University of Oxford, Oxford, 2014.
20. Trott, O.; Olson, A. J., AutoDock Vina: Improving the speed and accuracy of docking with a new scoring function, efficient optimization, and multithreading. *J. Comput. Chem.* **2010**, *31* (2), 455-461.
21. Cheng, Z.; Cheung, P.; Kuo, A. J.; Yukl, E. T.; Wilmot, C. M.; Gozani, O.; Patel, D. J.; A molecular threading mechanism underlies Jumonji lysine demethylase KDM2A regulation of methylated H3K36. *Genes Dev.* **2014**, *28* (16), 1758-1771.
22. Rotili, D., Altun, M., Kawamura, A., Wolf, A., Fischer, R., Leung, I.K.H., Mackeen, M.M., Tian, Y., Ratcliffe, P.J., Mai, A., Kessler, B.M., and Schofield, C.J. (2011) Article A Photoreactive Small-Molecule Probe for 2-Oxoglutarate Oxygenases. *Chem. Biol.*, **18** (5), 642–654.
23. Hopkinson, R.J., Tumber, A., Yapp, C., Chowdhury, R., Aik, W., Che, K.H., Li, X.S., Kristensen, J.B.L., King, O.N.F., Chan, M.C., Yeoh, K.K., Choi, H., Walport, L.J., Thinnes, C.C., Bush, J.T., Lejeune, C., Rydzik, A.M., Rose, N.R., Bagg, E. a., McDonough, M. a., Krojer, T.J., Yue, W.W., Ng, S.S., Olsen, L., Brennan, P.E., Oppermann, U., Müller, S., Klose, R.J., Ratcliffe, P.J., Schofield, C.J., and Kawamura, A. (2013) 5-Carboxy-8-hydroxyquinoline is a broad spectrum 2-oxoglutarate oxygenase inhibitor which causes iron translocation. *Chem. Sci.*, 3110–3117.
24. Johansson, C., Velupillai, S., Tumber, A., Szykowska, A., Hookway, E.S., Nowak, R.P., Strain-Damerell, C., Gileadi, C., Philpott, M., Burgess-Brown, N., Wu, N., Kopec, J., Nuzzi, A., Steuber, H., Egner, U., Badock, V., Munro, S., LaThangue, N.B., Westaway, S., Brown, J., Athanasou, N., Prinjha, R., Brennan, P.E., and Oppermann, U. (2016) Structural analysis of human KDM5B guides histone demethylase inhibitor development. *Nat. Chem. Biol.*, (may), 1–10.
25. Xu, W., Podoll, J.D., Dong, X., Tumber, A., Oppermann, U., and Wang, X. (2013) Quantitative analysis of histone demethylase probes using fluorescence polarization. *J Med Chem*, **56**, 5198–5202.
26. Allali-Hassani, A., Wasney, G. a, Siarheyeva, A., Hajian, T., Arrowsmith, C.H., and Vedadi, M. (2012) Fluorescence-based methods for screening writers and readers of histone methyl marks. *J. Biomol. Screen.*, **17** (1), 71–84.
27. Hatch, S.B., Yapp, C., Montenegro, R.C., Savitsky, P., Gamble, V., Tumber, A., Ruda, G.F., Bavetsias, V., Fedorov, O., Atrash, B., Raynaud, F., Lanigan, R., Carmichael, L., Tomlin, K., Burke, R., Westaway, S.M., Brown, J.A., Prinjha, R.K., Martinez, E.D., Oppermann, U., Schofield, C.J., Bountra, C., Kawamura, A., Blagg, J., and Brennan, P.E. (2017) Assessing histone demethylase inhibitors in cells : lessons learned. *Epigenetics Chromatin*, 1–17.
28. Wu, T.D., and Nacu, S. (2010) Fast and SNP-tolerant detection of complex variants and splicing in short reads. *Bioinformatics*, **26** (7), 873–81.
29. Gapp, B. V, Konopka, T., Penz, T., Dalal, V., Bürckstümmer, T., Bock, C., and Nijman, S.M.B. (2016) Parallel reverse genetic screening in mutant human cells using transcriptomics. *Mol. Syst. Biol.*, **12** (8), 879.
30. Totrov, M.; Abagyan, R., Flexible protein-ligand docking by global energy optimization in internal coordinates. *Proteins*, **1997**, *Suppl 1*, 215–220.

31. Wright, T. H., Bower, B. J., Chalker, J. M., Bernardes G. J. L., Wiewiora R., Ng, W.-L., Raj, R., Faulkner, S., Vallée M. R. J., Phantumrath A., Coleman, O. D., Thézénas M.-L., Khan, M., Galan S. R. G., Lercher L., Schombs M. W., Gerstberger S., Palm-Espling M. E., Baldwin A. J., Kessler B. M., Claridge T. D. W., Mohammed S., Davis B. G., Posttranslational mutagenesis: A chemical strategy for exploring protein side-chain diversity. *Science*, **2016**, 354 (6312), aag1465-5.
32. Cheng, Z.; Cheung, P.; Kuo, A. J.; Yukl, E. T.; Wilmot, C. M.; Gozani, O.; Patel, D. J., A molecular threading mechanism underlies Jumonji lysine demethylase KDM2A regulation of methylated H3K36. *Genes Dev.*, **2014**, 28 (16), 1758–1771.
